# Supplementary material for: Macrophage mediated recognition and clearance of Borrelia burgdorferi elicits MyD88-dependent and -independent phagosomal signals that contribute to phagocytosis and inflammation
Source: BMC Immunol. 2021 May 17;22:32. doi: 10.1186/s12865-021-00418-8 (PMC8127205; doi:10.1186/s12865-021-00418-8)
Supplement: Supplementary file 1 — Additional file 1: Supplemental File 1. Gene ontology analysis of differentially expressed genes. [file 12865_2021_418_MOESM1_ESM.xlsx]

## Sheet: MyD88 Dependent
ID	Level	Title	Number of hits	Group size	Expected hits	P-value	Adjusted P-value	Hit names
GO:0009987	2	cellular process	2018	12806	1548.84	3.60531e-88	2.21042e-84	["0610010K14Rik","2700049A03Rik","Aanat","Aarsd1","Aatk","Abca1","Abca12","Abca13","Abca15","Abca2","Abcb5","Abcb8","Abcc1","Abcc3","Abcc4","Abcc5","Abcc6","Abcc8","Abcd1","Abhd12","Abi3","Abl2","Abtb1","Abtb2","Acaa2","Acads","Acd","Acot1","Acot2","Acot7","Acot9","Acox3","Acp5","Acsf2","Acsl4","Acsl5","Acss1","Actr10","Acvr1b","Acvr2a","Adam12","Adam15","Adam17","Adam8","Adamts12","Adamts4","Ada…
GO:0008152	2	metabolic process	1582	9566	1156.97	1.32116e-68	4.05002e-65	["4931406C07Rik","Aanat","Aarsd1","Aatk","Abca1","Abca12","Abca13","Abca15","Abca2","Abcb5","Abcb8","Abcc1","Abcc3","Abcc4","Abcc5","Abcc6","Abcc8","Abcd1","Abhd12","Abhd14b","Abhd15","Abhd17a","Abhd17c","Abhd2","Abhd4","Abhd8","Abi3","Abl2","Abtb1","Acaa2","Acads","Accs","Acd","Acot1","Acot2","Acot7","Acot9","Acox3","Acp5","Acsf2","Acsl4","Acsl5","Acss1","Acvr1b","Acvr2a","Adam12","Adam15","Adam…
GO:0044763	3	single-organism cellular process	1609	9820	1187.69	2.66329e-67	5.44288e-64	["2700049A03Rik","Aarsd1","Aatk","Abca1","Abca12","Abca13","Abca15","Abca2","Abcb5","Abcb8","Abcc1","Abcc3","Abcc4","Abcc5","Abcc6","Abcc8","Abcd1","Abhd12","Abi3","Abl2","Acaa2","Acads","Acd","Acot1","Acot2","Acot7","Acox3","Acp5","Acsf2","Acsl4","Acsl5","Acss1","Actr10","Acvr1b","Acvr2a","Adam12","Adam15","Adam17","Adam8","Adamts12","Adamts4","Adamts7","Adamtsl1","Adcy3","Adcy7","Adcy9","Add3",…
GO:0048518	4	positive regulation of biological process	1010	5484	663.269	7.31682e-57	1.05765e-53	["1810022K09Rik","Abca1","Abca12","Abcb5","Abcc1","Abcc4","Abcc8","Abhd14b","Abl2","Acap3","Acd","Acp5","Acsl4","Acsl5","Acvr1b","Acvr2a","Adam17","Adam8","Adamts7","Adap1","Adap2","Adcy3","Adcy7","Adcy9","Adgrb2","Adgrg1","Adgrl2","Adgrl3","Adipor2","Adm","Adora2a","Adora2b","Adra1a","Aes","Aff1","Agap1","Agap3","Agfg1","Agfg2","Agpat1","Agpat2","Ahctf1","Ahr","Ahsa1","Akap6","Akna","Akr1c18","A…
GO:0071704	3	organic substance metabolic process	1406	8475	1025.02	8.6254e-57	1.05765e-53	["Aanat","Aarsd1","Aatk","Abca1","Abca2","Abcc1","Abcc3","Abcc5","Abcc8","Abcd1","Abhd12","Abhd4","Abi3","Abl2","Abtb1","Acaa2","Acads","Acd","Acot1","Acot2","Acot7","Acot9","Acox3","Acp5","Acsf2","Acsl4","Acsl5","Acss1","Acvr1b","Acvr2a","Adam12","Adam15","Adam17","Adam7","Adam8","Adamts10","Adamts12","Adamts18","Adamts19","Adamts4","Adamts7","Adamtsl1","Adck1","Adcy3","Adcy7","Adcy9","Adgb","Ad…
GO:0044238	3	primary metabolic process	1364	8175	988.735	1.02806e-55	1.0505e-52	["Aanat","Aarsd1","Aatk","Abca1","Abca2","Abcc1","Abcc3","Abcc5","Abcc8","Abcd1","Abhd12","Abhd4","Abi3","Abl2","Abtb1","Acaa2","Acads","Acd","Acot1","Acot2","Acot7","Acox3","Acsf2","Acsl4","Acsl5","Acss1","Acvr1b","Acvr2a","Adam12","Adam15","Adam17","Adam7","Adam8","Adamts10","Adamts12","Adamts18","Adamts19","Adamts4","Adamts7","Adamtsl1","Adck1","Adcy3","Adcy7","Adcy9","Adgb","Adi1","Adipor2","…
GO:0044237	3	cellular metabolic process	1326	8016	969.505	7.87714e-51	6.89925e-48	["Aanat","Aarsd1","Aatk","Abca1","Abcc1","Abcc3","Abcc8","Abcd1","Abhd12","Abi3","Abl2","Abtb1","Acaa2","Acads","Acd","Acot1","Acot2","Acot7","Acot9","Acox3","Acp5","Acsf2","Acsl4","Acsl5","Acss1","Acvr1b","Acvr2a","Adam17","Adamts12","Adamts7","Adamtsl1","Adck1","Adcy3","Adcy7","Adcy9","Adi1","Adipor2","Adm","Adora2a","Adora2b","Adssl1","Aebp1","Aes","Aff1","Agap3","Ago3","Ago4","Agpat1","Agpat2…
GO:0048583	4	regulation of response to stimulus	699	3494	422.586	5.35184e-49	4.10152e-46	["1810022K09Rik","Abca1","Abl2","Acaa2","Acp5","Acsl5","Acvr1b","Acvr2a","Adam17","Adam8","Adamts12","Adamts18","Adgrg1","Adora2a","Adora2b","Adra1a","Aes","Ago3","Ago4","Agpat1","Agpat2","Akap6","Akr1c18","Akt1s1","Alox5ap","Alpk1","Als2cl","Ambp","Amot","Angpt2","Aoah","Ap1b1","Ap1s1","Ap1s3","Ap2a1","Aplp2","Apoe","Arap2","Arfgef3","Arhgap19","Arhgap22","Arhgap24","Arhgap25","Arhgap31","Arhgap…
GO:0044710	3	single-organism metabolic process	791	4295	519.464	1.27415e-41	8.67976e-39	["Aanat","Aarsd1","Abca1","Abca2","Abcc1","Abcc3","Abcc4","Abcc5","Abcc8","Abcd1","Abhd12","Abhd4","Acaa2","Acads","Acd","Acot1","Acot2","Acot7","Acox3","Acp5","Acsf2","Acsl4","Acsl5","Acss1","Acvr1b","Acvr2a","Adam15","Adam17","Adamts7","Adamtsl1","Adcy3","Adcy7","Adcy9","Adi1","Adipor2","Adm","Adora2a","Adora2b","Adssl1","Ago3","Ago4","Agpat1","Agpat2","Agpat5","Ahcyl2","Akr1c18","Akr7a5","Alas…
GO:0048522	5	positive regulation of cellular process	855	4765	576.309	5.03898e-41	3.0894e-38	["1810022K09Rik","Abca1","Abca12","Abcc1","Abcc4","Abhd14b","Abl2","Acd","Acp5","Acsl4","Acsl5","Acvr1b","Acvr2a","Adam17","Adam8","Adamts7","Adcy3","Adcy7","Adcy9","Adgrb2","Adgrg1","Adgrl2","Adgrl3","Adm","Adora2a","Adora2b","Adra1a","Aes","Aff1","Agpat1","Agpat2","Ahctf1","Ahr","Akap6","Akna","Akr1c18","Aldh1a2","Aldh4a1","Alpk1","Amot","Anapc10","Anapc11","Anapc2","Ang","Ankar","Anxa3","Apobe…
GO:0019222	4	regulation of metabolic process	1075	6481	783.852	8.73332e-38	4.86764e-35	["0610009O20Rik","1810022K09Rik","Aarsd1","Abca1","Abca2","Abhd14b","Abl2","Acap3","Acd","Acp5","Acsl4","Acsl5","Acvr1b","Acvr2a","Adam17","Adam8","Adamts7","Adap1","Adap2","Adcy3","Adcy7","Adcy9","Adm","Adora2a","Adora2b","Adra1a","Aebp1","Aes","Aff1","Agap1","Agap3","Agfg1","Agfg2","Ago3","Ago4","Agpat1","Ahctf1","Ahnak","Ahr","Ahsa1","Akap6","Akna","Akr1c18","Akt1s1","Aldh1a2","Alox5ap","Alpk1…
GO:0010646	5	regulation of cell communication	579	2933	354.735	1.08803e-37	5.55895e-35	["Abca1","Abcc8","Abl2","Acaa2","Acsl5","Acvr1b","Acvr2a","Adam17","Adam8","Adamts12","Adgrg1","Adora2a","Adora2b","Adra1a","Aes","Agpat1","Agpat2","Akap6","Akr1c18","Akt1s1","Als2cl","Ambp","Amot","Anapc2","Ap2a1","Aplp2","Apoe","Arap2","Arfgef3","Arhgap19","Arhgap22","Arhgap24","Arhgap25","Arhgap31","Arhgap39","Arhgap9","Arhgdia","Arhgef1","Arhgef10l","Arhgef3","Arhgef6","Arhgef7","Arl2","Arrb1…
GO:0044699	2	single-organism process	1833	12631	1527.67	1.88732e-37	8.90088e-35	["2700049A03Rik","Aanat","Aarsd1","Aatk","Abca1","Abca12","Abca13","Abca15","Abca2","Abcb5","Abcb8","Abcc1","Abcc3","Abcc4","Abcc5","Abcc6","Abcc8","Abcd1","Abhd12","Abhd4","Abi3","Abl2","Acaa2","Acads","Acd","Acot1","Acot2","Acot7","Acox3","Acp5","Acsf2","Acsl4","Acsl5","Acss1","Actr10","Acvr1b","Acvr2a","Adam12","Adam15","Adam17","Adam7","Adam8","Adamts12","Adamts18","Adamts4","Adamts7","Adamts…
GO:0009966	5	regulation of signal transduction	520	2551	308.534	2.46018e-37	1.07738e-34	["Abca1","Abl2","Acaa2","Acsl5","Acvr1b","Acvr2a","Adam17","Adam8","Adamts12","Adgrg1","Adora2a","Adora2b","Adra1a","Aes","Agpat1","Agpat2","Akap6","Akr1c18","Akt1s1","Als2cl","Ambp","Amot","Ap2a1","Aplp2","Apoe","Arap2","Arfgef3","Arhgap19","Arhgap22","Arhgap24","Arhgap25","Arhgap31","Arhgap39","Arhgap9","Arhgdia","Arhgef1","Arhgef10l","Arhgef3","Arhgef6","Arhgef7","Arrb1","Atf3","Atm","Atp2c1",…
GO:0065007	2	biological regulation	1743	11898	1439.02	2.17155e-36	8.87586e-34	["0610009O20Rik","1810022K09Rik","2700049A03Rik","2900011O08Rik","Aanat","Aarsd1","Aatk","Abca1","Abca12","Abca2","Abcb5","Abcc1","Abcc4","Abcc8","Abhd14b","Abhd2","Abi3","Abl2","Acaa2","Acap3","Acd","Acp5","Acsl4","Acsl5","Acvr1b","Acvr2a","Adam12","Adam15","Adam17","Adam7","Adam8","Adamts12","Adamts18","Adamts19","Adamts7","Adap1","Adap2","Adcy3","Adcy7","Adcy9","Adgrb2","Adgre1","Adgrf1","Adgr…
GO:0048523	5	negative regulation of cellular process	770	4294	519.343	5.78168e-36	2.21547e-33	["2900011O08Rik","Aatk","Abca1","Abcc1","Abcc8","Abhd2","Abl2","Acaa2","Acd","Acp5","Acvr1b","Adam15","Adam17","Adam8","Adamts12","Adamts18","Adamts7","Adgrg1","Adipor2","Adm","Adora2a","Adora2b","Adra1a","Aebp1","Aes","Ago3","Ago4","Ahr","Akap6","Akr1c18","Akt1s1","Aldh1a2","Aldh2","Ambp","Anapc10","Anapc11","Anapc2","Ang","Angpt2","Angptl4","Ap2a1","Aplp2","Apobec1","Apoe","Arfgef3","Arhgap24",…
GO:0023051	4	regulation of signaling	568	2916	352.679	3.61292e-35	1.30299e-32	["Abca1","Abcc8","Abl2","Acaa2","Acsl5","Acvr1b","Acvr2a","Adam17","Adam8","Adamts12","Adgrg1","Adora2a","Adora2b","Adra1a","Aes","Agpat1","Agpat2","Akap6","Akr1c18","Akt1s1","Als2cl","Ambp","Amot","Anapc2","Ap2a1","Aplp2","Apoe","Arap2","Arfgef3","Arhgap19","Arhgap22","Arhgap24","Arhgap25","Arhgap31","Arhgap39","Arhgap9","Arhgdia","Arhgef1","Arhgef10l","Arhgef3","Arhgef6","Arhgef7","Arl2","Arrb1…
GO:0009893	5	positive regulation of metabolic process	668	3604	435.89	5.93531e-35	2.02163e-32	["1810022K09Rik","Abca1","Abhd14b","Abl2","Acap3","Acd","Acsl5","Acvr1b","Acvr2a","Adam17","Adam8","Adamts7","Adap1","Adap2","Adcy3","Adcy7","Adcy9","Adm","Adora2a","Adora2b","Adra1a","Aff1","Agap1","Agap3","Agfg1","Agfg2","Agpat1","Ahctf1","Ahr","Ahsa1","Akap6","Akna","Akr1c18","Aldh1a2","Alox5ap","Alpk1","Als2cl","Anapc10","Anapc11","Anapc2","Ang","Angptl4","Ankar","Anxa3","Apobec1","Apoe","Ara…
GO:0048519	4	negative regulation of biological process	819	4697	568.084	3.92063e-34	1.26513e-31	["2900011O08Rik","Aatk","Abca1","Abcc1","Abcc8","Abhd2","Abl2","Acaa2","Acd","Acp5","Acsl4","Acvr1b","Adam15","Adam17","Adam8","Adamts12","Adamts18","Adamts7","Adgrb2","Adgrg1","Adipor2","Adm","Adora2a","Adora2b","Adra1a","Aebp1","Aes","Ago3","Ago4","Ahr","Akap6","Akr1c18","Akt1s1","Aldh1a2","Aldh2","Ambp","Amot","Anapc10","Anapc11","Anapc2","Ang","Angpt2","Angptl4","Anxa3","Aoah","Ap2a1","Aplp2"…
GO:0002376	2	immune system process	389	1780	215.284	5.62807e-34	1.72528e-31	["Abcb5","Abl2","Actr1b","Adam15","Adam17","Adam8","Adcy3","Adcy7","Adcy9","Adssl1","Ago3","Ago4","Ahr","Akt1s1","Angpt2","Anxa3","Ap1b1","Ap1s1","Ap1s3","Ap2a1","Apobec1","Aqp9","Arpc4","Atg7","Atm","Atp1b3","B2m","B4galt1","Bag6","Baiap2","Bak1","Batf","Batf2","Bcl3","Blmh","Blnk","Bmi1","Braf","Brk1","Bst1","C1qa","C1qb","C1qc","C1ra","Cacnb3","Cadm1","Casp1","Casp3","Casp9","Cblb","Ccl17","Cc…
GO:0043170	4	macromolecule metabolic process	1108	6877	831.747	2.21475e-33	6.46603e-31	["Aanat","Aarsd1","Aatk","Abca1","Abcc5","Abi3","Abl2","Abtb1","Acd","Acvr1b","Acvr2a","Adam12","Adam15","Adam17","Adam7","Adam8","Adamts10","Adamts12","Adamts18","Adamts19","Adamts4","Adamts7","Adamtsl1","Adck1","Adgb","Adm","Adora2b","Aebp1","Aes","Aff1","Agap3","Ago3","Ago4","Ahctf1","Ahr","Akna","Alg10b","Alg11","Alpk1","Alpk2","Ambp","Anapc10","Anapc11","Anapc2","Ang","Anp32a","Aoah","Ap1s1"…
GO:0048584	5	positive regulation of response to stimulus	399	1860	224.96	5.0034e-33	1.39436e-30	["Abl2","Acvr1b","Acvr2a","Adam17","Adam8","Adgrg1","Adora2a","Adora2b","Adra1a","Agpat1","Agpat2","Akap6","Akr1c18","Alox5ap","Arpc4","Arrb1","Atf3","Atg7","Atm","Atp2c1","B2m","Babam1","Baiap2","Bak1","Bambi","Blnk","Bmf","Bmper","Braf","Brk1","C1qa","C1qb","C1qc","C1ra","C5ar2","Cacnb3","Cadm1","Camk1d","Cant1","Casp1","Casp2","Cbx8","Cc2d1a","Ccdc22","Ccl24","Ccl3","Ccl5","Cd180","Cd28","Cd30…
GO:0050789	3	regulation of biological process	1671	11418	1380.96	5.37961e-33	1.43402e-30	["0610009O20Rik","1810022K09Rik","2700049A03Rik","2900011O08Rik","Aanat","Aarsd1","Aatk","Abca1","Abca12","Abca2","Abcb5","Abcc1","Abcc4","Abcc8","Abhd14b","Abhd2","Abi3","Abl2","Acaa2","Acap3","Acd","Acp5","Acsl4","Acsl5","Acvr1b","Acvr2a","Adam12","Adam15","Adam17","Adam7","Adam8","Adamts12","Adamts18","Adamts19","Adamts7","Adap1","Adap2","Adcy3","Adcy7","Adcy9","Adgrb2","Adgre1","Adgrf1","Adgr…
GO:0006950	3	response to stress	592	3149	380.86	3.1554e-32	8.06074e-30	["Abca1","Abcc1","Abhd2","Abl2","Acaa2","Acads","Acd","Acot2","Acp5","Adam15","Adam17","Adam8","Adamts4","Adcy3","Adcy7","Adcy9","Adm","Adora2a","Adora2b","Adprhl2","Adssl1","Agap3","Ago3","Ago4","Ahr","Ahsa1","Akr1c18","Akt1s1","Alas1","Aldh2","Aldh3a2","Anapc10","Anapc11","Anapc2","Ang","Angpt2","Angptl4","Anxa3","Aoah","Ap1s1","Ap5s1","Ap5z1","Apobec1","Apoe","Aqp9","Arg1","Arg2","Arhgef10l","…
GO:0065009	3	regulation of molecular function	530	2740	331.393	9.28379e-32	2.27676e-29	["0610009O20Rik","Abl2","Acap3","Acd","Acvr2a","Adam15","Adam17","Adam8","Adap1","Adap2","Adcy3","Adcy7","Adcy9","Adora2a","Adora2b","Adra1a","Aes","Agap1","Agap3","Agfg1","Agfg2","Ahnak","Ahsa1","Akap6","Akt1s1","Alox5ap","Als2cl","Ambp","Amot","Anapc10","Anapc11","Anapc2","Ang","Angptl4","Anxa3","Aplp2","Apoe","Arap2","Arfgef3","Arg2","Arhgap19","Arhgap22","Arhgap24","Arhgap25","Arhgap27","Arhg…
GO:0019538	4	protein metabolic process	715	4028	487.171	1.81338e-31	4.27609e-29	["Aanat","Aarsd1","Aatk","Abca1","Abi3","Abl2","Abtb1","Acvr1b","Acvr2a","Adam12","Adam15","Adam17","Adam7","Adam8","Adamts10","Adamts12","Adamts18","Adamts19","Adamts4","Adamts7","Adamtsl1","Adck1","Adgb","Adora2b","Aebp1","Agap3","Alg10b","Alg11","Alpk1","Alpk2","Ambp","Anapc10","Anapc11","Anapc2","Ap1s1","Apeh","Apobec1","Apoe","Arhgef6","Arrb1","Arsa","Arsb","Astl","Atf3","Atg7","Atm","B2m","…
GO:0031323	5	regulation of cellular metabolic process	926	5591	676.21	1.10807e-30	2.51614e-28	["1810022K09Rik","Aarsd1","Abca1","Abca2","Abhd14b","Abl2","Acd","Acp5","Acsl4","Acsl5","Acvr1b","Acvr2a","Adam17","Adam8","Adamts7","Adcy3","Adcy7","Adcy9","Adm","Adora2a","Adora2b","Adra1a","Aebp1","Aes","Aff1","Ago3","Ago4","Agpat1","Ahctf1","Ahnak","Ahr","Akap6","Akna","Akr1c18","Akt1s1","Alpk1","Ambp","Anapc10","Anapc11","Anapc2","Ang","Ankar","Anp32a","Anxa3","Aplp2","Apobec1","Apoe","Arfge…
GO:0080090	5	regulation of primary metabolic process	889	5345	646.457	8.51633e-30	1.86477e-27	["0610009O20Rik","Aarsd1","Abca1","Abca2","Abhd14b","Abl2","Acd","Acsl4","Acsl5","Acvr1b","Acvr2a","Adam17","Adam8","Adcy3","Adcy7","Adcy9","Adm","Adora2a","Adora2b","Adra1a","Aebp1","Aes","Aff1","Ago3","Ago4","Ahctf1","Ahnak","Ahr","Akap6","Akna","Akr1c18","Akt1s1","Ambp","Anapc10","Anapc11","Anapc2","Ang","Angptl4","Ankar","Anp32a","Anxa3","Ap2a1","Aplp2","Apobec1","Apoe","Arhgap22","Arhgef10l"…
GO:1902531	6	regulation of intracellular signal transduction	331	1500	181.419	1.42115e-29	3.00451e-27	["Abca1","Abl2","Adam8","Adgrg1","Adora2b","Adra1a","Akap6","Akr1c18","Akt1s1","Als2cl","Ambp","Amot","Apoe","Arap2","Arfgef3","Arhgap19","Arhgap22","Arhgap24","Arhgap25","Arhgap31","Arhgap39","Arhgap9","Arhgdia","Arhgef1","Arhgef10l","Arhgef3","Arhgef6","Arhgef7","Arrb1","Atm","Atp2c1","Bcl2a1b","Bcl2l12","Bcl3","Bmf","Bmper","Braf","C5ar2","Cant1","Casp1","Cc2d1a","Ccdc22","Ccl3","Ccl5","Cd28",…
GO:0050794	4	regulation of cellular process	1590	10916	1320.25	1.20206e-28	2.4566e-26	["0610009O20Rik","1810022K09Rik","2700049A03Rik","2900011O08Rik","Aarsd1","Aatk","Abca1","Abca12","Abca2","Abcc1","Abcc4","Abcc8","Abhd14b","Abhd2","Abi3","Abl2","Acaa2","Acd","Acp5","Acsl4","Acsl5","Acvr1b","Acvr2a","Adam12","Adam15","Adam17","Adam7","Adam8","Adamts12","Adamts18","Adamts19","Adamts7","Adap1","Adap2","Adcy3","Adcy7","Adcy9","Adgrb2","Adgre1","Adgrf1","Adgrg1","Adgrg5","Adgrg6","A…
GO:0044281	4	small molecule metabolic process	441	2221	268.621	1.31196e-28	2.59471e-26	["Aanat","Aarsd1","Abca1","Abca2","Abcc1","Abcc3","Abcc5","Abcc8","Abcd1","Abhd12","Acaa2","Acads","Acot1","Acot2","Acot7","Acox3","Acp5","Acsf2","Acsl4","Acsl5","Acss1","Adcy3","Adcy7","Adcy9","Adi1","Adipor2","Adm","Adora2a","Adssl1","Agpat1","Agpat2","Agpat5","Ahcyl2","Akr1c18","Akr7a5","Alas1","Aldh1a2","Aldh1l1","Aldh2","Aldh3a2","Aldh4a1","Alox5ap","Amdhd2","Angptl4","Aplp2","Apoa1bp","Apob…
GO:0044093	4	positive regulation of molecular function	358	1700	205.609	6.67604e-28	1.27909e-25	["Abl2","Acap3","Acd","Adam17","Adam8","Adap1","Adap2","Adcy3","Adcy7","Adcy9","Adora2a","Adora2b","Adra1a","Agap1","Agap3","Agfg1","Agfg2","Ahsa1","Akap6","Alox5ap","Als2cl","Anapc10","Anapc11","Anapc2","Ang","Anxa3","Apoe","Arap2","Arfgef3","Arhgap19","Arhgap22","Arhgap24","Arhgap25","Arhgap27","Arhgap31","Arhgap9","Arhgdia","Arhgef1","Arhgef10l","Arhgef3","Arhgef6","Arhgef7","Arid5b","Arrb1","…
GO:0002682	4	regulation of immune system process	313	1428	172.711	2.07242e-27	3.85031e-25	["1810022K09Rik","Abcb5","Acvr1b","Acvr2a","Adam17","Adam8","Adora2a","Adora2b","Ago3","Ago4","Ahr","Akt1s1","Alpk1","Ambp","Ap1b1","Ap1s1","Ap1s3","Ap2a1","Arpc4","Atg7","Atm","B2m","Baiap2","Bmi1","Brk1","Bst1","C1qa","C1qb","C1qc","C1ra","C5ar2","Cacnb3","Cadm1","Camk1d","Car2","Casp3","Casp9","Cblb","Ccl24","Ccl3","Ccl5","Cd274","Cd28","Cd300a","Cd300lb","Cd300lh","Cd37","Cd37 (ENSMUSG0000010…
GO:0035556	6	intracellular signal transduction	367	1768	213.833	2.3005e-27	4.14835e-25	["Aatk","Acvr1b","Adam15","Adam17","Adap1","Adap2","Adcy3","Adcy7","Adcy9","Adgrg1","Adm","Adora2b","Adra1a","Agap1","Agap3","Ago3","Ago4","Ahctf1","Akap6","Akt1s1","Amot","Anp32a","Apoe","Arap2","Arhgap19","Arhgap22","Arhgap24","Arhgap25","Arhgap31","Arhgap39","Arhgap9","Arhgdia","Arhgef1","Arhgef3","Arhgef6","Arhgef7","Arl11","Arl2","Arl4c","Arl5c","Arpc4","Atm","Atp1a2","Bag6","Baiap2","Bak1",…
GO:0044260	4	cellular macromolecule metabolic process	975	6092	736.804	6.51526e-27	1.14129e-24	["Aanat","Aarsd1","Aatk","Abca1","Abi3","Abl2","Abtb1","Acd","Acvr1b","Acvr2a","Adam17","Adamts12","Adamts7","Adamtsl1","Adck1","Adm","Adora2b","Aebp1","Aes","Aff1","Agap3","Ago3","Ago4","Ahctf1","Ahr","Akna","Alg10b","Alg11","Alpk1","Alpk2","Ambp","Anapc10","Anapc11","Anapc2","Ang","Anp32a","Aoah","Ap1s1","Ap5s1","Ap5z1","Apobec1","Apoe","Arhgap22","Arhgef6","Arid1b","Arid5a","Arid5b","Arrb1","A…
GO:0050790	4	regulation of catalytic activity	436	2241	271.04	2.63507e-26	4.48767e-24	["0610009O20Rik","Abl2","Acap3","Acd","Acvr2a","Adam17","Adam8","Adap1","Adap2","Adcy3","Adcy7","Adcy9","Adora2a","Adora2b","Adra1a","Agap1","Agap3","Agfg1","Agfg2","Ahsa1","Akap6","Akt1s1","Alox5ap","Als2cl","Ambp","Amot","Anapc10","Anapc11","Anapc2","Ang","Angptl4","Anxa3","Aplp2","Apoe","Arap2","Arfgef3","Arg2","Arhgap19","Arhgap22","Arhgap24","Arhgap25","Arhgap27","Arhgap31","Arhgap9","Arhgdi…
GO:0009967	6	positive regulation of signal transduction	296	1353	163.64	9.01352e-26	1.49356e-23	["Abl2","Acvr1b","Acvr2a","Adam17","Adam8","Adgrg1","Adora2a","Adora2b","Adra1a","Agpat1","Agpat2","Akap6","Akr1c18","Arrb1","Atf3","Atm","Atp2c1","Bak1","Bambi","Blnk","Bmf","Bmper","Braf","C5ar2","Cant1","Casp1","Casp2","Cc2d1a","Ccdc22","Ccl3","Ccl5","Cd180","Cd28","Cd300lh","Cd40","Cd44","Cdk5rap3","Cflar","Cib1","Cmtm3","Crebrf","Crk","Csf2","Csf3","Csk","Csnk1a1","Csnk1e","Csnk1g2","Ctsc","…
GO:0032879	4	regulation of localization	463	2436	294.625	1.0288e-25	1.65988e-23	["2700049A03Rik","2900011O08Rik","Abca1","Abca12","Abca2","Abcc1","Abcc8","Abhd2","Abi3","Abl2","Acaa2","Acp5","Acsl4","Acsl5","Acvr1b","Acvr2a","Adam15","Adam17","Adam8","Adgrg1","Adipor2","Adora2a","Adora2b","Ahnak","Akap6","Amot","Ang","Angpt2","Anxa3","Apoe","Appl1","Arg1","Arg2","Arhgdia","Arhgef7","Arl2","Arrb1","Arsb","Aspscr1","Atg7","Atp1a2","Atp1b3","Atp2b2","B3gat3","B4galt1","Bak1","B…
GO:0051716	3	cellular response to stimulus	515	2810	339.859	5.83004e-25	9.16512e-23	["Aanat","Abca1","Abcc8","Abl2","Abtb2","Acaa2","Acd","Acsl5","Acvr2a","Adam8","Adamts12","Adamts7","Adcy3","Adcy7","Adcy9","Adm","Adora2b","Adprhl2","Adssl1","Aes","Agap3","Ago3","Ago4","Ahr","Akap6","Akr1c18","Akt1s1","Alas1","Aldh1a2","Aldh2","Alox5ap","Anapc10","Anapc11","Anapc2","Angpt2","Angptl4","Ap1s1","Ap5s1","Ap5z1","Apobec1","Apoe","Aprt","Aqp9","Arg1","Arg2","Arhgdia","Arhgef10l","Arh…
GO:0080134	5	regulation of response to stress	292	1347	162.915	9.27704e-25	1.40378e-22	["1810022K09Rik","Acp5","Adam8","Adamts12","Adamts18","Adora2a","Adora2b","Akt1s1","Alox5ap","Alpk1","Ambp","Aoah","Ap1b1","Ap1s1","Ap1s3","Ap2a1","Apoe","Atg7","Atm","B2m","Babam1","Bak1","Bcl2l12","Braf","Cadm1","Calcrl","Casp1","Casp4","Casp9","Cbx8","Ccl24","Ccl3","Ccl5","Cd28","Cd37","Cd37 (ENSMUSG00000109208)","Cd44","Cd55","Cd93","Cdk19","Cfb","Chaf1b","Chordc1","Chst3","Clec2d","Cnpy3","C…
GO:0031325	6	positive regulation of cellular metabolic process	535	2954	357.275	9.38756e-25	1.40378e-22	["1810022K09Rik","Abca1","Abhd14b","Abl2","Acd","Acsl5","Acvr1b","Acvr2a","Adam17","Adam8","Adamts7","Adcy3","Adcy7","Adcy9","Adm","Adora2a","Adora2b","Adra1a","Aff1","Agpat1","Ahctf1","Ahr","Akap6","Akna","Akr1c18","Alpk1","Anapc10","Anapc11","Anapc2","Ang","Ankar","Anxa3","Apobec1","Apoe","Arhgef10l","Arid1b","Arid5a","Arid5b","Arrb1","Arrdc4","Ass1","Astl","Atf3","Atf6b","Atg7","Atmin","Babam1…
GO:0006793	4	phosphorus metabolic process	384	1937	234.273	1.25616e-24	1.8337e-22	["Aatk","Abhd12","Abi3","Abl2","Acaa2","Acot1","Acot2","Acot7","Acot9","Acp5","Acsl4","Acsl5","Acss1","Acvr1b","Acvr2a","Adck1","Adcy3","Adcy7","Adcy9","Adm","Adora2a","Adora2b","Adssl1","Agpat1","Agpat2","Agpat5","Akap6","Alpk1","Alpk2","Apoa1bp","Aprt","Arhgef6","Atm","Atp2b2","Atp5d","Atp5g1","Atp6v0a1","Atp6v1a","Bckdk","Bmp2k","Braf","Calcrl","Camk1","Camk1d","Cant1","Ccl3","Ccl5","Cdipt","C…
GO:0044267	5	cellular protein metabolic process	575	3240	391.866	1.59404e-24	2.2728e-22	["Aanat","Aarsd1","Aatk","Abca1","Abi3","Abl2","Abtb1","Acvr1b","Acvr2a","Adam17","Adamts7","Adamtsl1","Adck1","Adora2b","Alg10b","Alg11","Alpk1","Alpk2","Ambp","Anapc10","Anapc11","Anapc2","Ap1s1","Arhgef6","Arrb1","Arsa","Arsb","Atf3","Atg7","Atm","B2m","B3gat3","B3gnt3","B3gnt8","B4galt1","B4galt4","B4galt6","B4gat1","Babam1","Bag6","Bckdk","Bhmt","Blmh","Bmi1","Bmp2k","Braf","Cacul1","Camk1",…
GO:0043085	5	positive regulation of catalytic activity	302	1414	171.018	1.64948e-24	2.27358e-22	["Abl2","Acap3","Acd","Adam17","Adam8","Adap1","Adap2","Adcy3","Adcy7","Adcy9","Adora2a","Adora2b","Adra1a","Agap1","Agap3","Agfg1","Agfg2","Ahsa1","Akap6","Alox5ap","Als2cl","Anapc10","Anapc11","Anapc2","Ang","Apoe","Arap2","Arfgef3","Arhgap19","Arhgap22","Arhgap24","Arhgap25","Arhgap27","Arhgap31","Arhgap9","Arhgdia","Arhgef1","Arhgef10l","Arhgef3","Arhgef6","Arhgef7","Arrb1","Arrdc4","Atp1b3",…
GO:0010647	6	positive regulation of cell communication	319	1521	183.959	1.66875e-24	2.27358e-22	["Abl2","Acvr1b","Acvr2a","Adam17","Adam8","Adgrg1","Adora2a","Adora2b","Adra1a","Agpat1","Agpat2","Akap6","Akr1c18","Arhgef7","Arrb1","Atf3","Atg7","Atm","Atp2c1","Bak1","Bambi","Blnk","Bmf","Bmper","Braf","C5ar2","Cant1","Car2","Casp1","Casp2","Cc2d1a","Ccdc22","Ccl3","Ccl5","Cd180","Cd28","Cd300lh","Cd38","Cd40","Cd44","Cdk5rap3","Cflar","Cftr","Cib1","Cmtm3","Crebrf","Crk","Csf2","Csf3","Csk"…
GO:0009892	5	negative regulation of metabolic process	488	2639	319.177	1.97534e-24	2.63278e-22	["Acd","Acp5","Acvr1b","Adora2a","Adora2b","Aebp1","Aes","Ago3","Ago4","Ahr","Akap6","Akr1c18","Akt1s1","Ambp","Amot","Anapc10","Anapc11","Anapc2","Ang","Angptl4","Anxa3","Ap2a1","Aplp2","Apoe","Arfgef3","Arg2","Arid5a","Arid5b","Arl2","Arrb1","Atf3","Atg7","Atm","Atp8b1","Atraid","BC094916","Bace2","Bag6","Bahcc1","Bak1","Bcas3","Bcl2l12","Bcl3","Bend6","Bmi1","Bscl2","Cacna1a","Calu","Casp3","C…
GO:0031324	6	negative regulation of cellular metabolic process	439	2308	279.144	2.22573e-24	2.90339e-22	["Acd","Acp5","Adora2a","Aebp1","Aes","Ago3","Ago4","Ahr","Akap6","Akr1c18","Akt1s1","Ambp","Anapc10","Anapc11","Anapc2","Ang","Aplp2","Apoe","Arfgef3","Arid5a","Arid5b","Arrb1","Atf3","Atg7","Atm","Atp8b1","Atraid","BC094916","Bace2","Bag6","Bahcc1","Bak1","Bcl2l12","Bcl3","Bend6","Bmi1","Cacna1a","Casp3","Cbx4","Cbx6","Cbx7","Cbx8","Cby1","Cc2d1a","Cc2d1b","Ccar1","Ccl3","Ccl5","Cd300a","Cd38",…
GO:0044767	3	single-organism developmental process	811	4956	599.409	2.73493e-24	3.4933e-22	["2700049A03Rik","Aatk","Abca12","Abca15","Abcb5","Abl2","Acd","Acp5","Acsl4","Acvr1b","Acvr2a","Adam12","Adam15","Adam17","Adam8","Adamts18","Adamts4","Adap2","Adgrg1","Adgrl2","Adgrl3","Adipor2","Adm","Adora2a","Adra1a","Aebp1","Aes","Agfg1","Agpat5","Ahctf1","Ahr","Aldh1a2","Aldh2","Alg10b","Amot","Anapc2","Ang","Angpt2","Angptl2","Angptl4","Antxr1","Anxa3","Apba2","Aplp2","Apoe","Arg1","Arg2"…
GO:0051246	6	regulation of protein metabolic process	464	2488	300.914	5.94336e-24	7.43647e-22	["0610009O20Rik","Aarsd1","Abl2","Acvr1b","Acvr2a","Adam17","Adam8","Adcy3","Adcy7","Adcy9","Adora2a","Adora2b","Adra1a","Ago3","Ago4","Akap6","Akt1s1","Ambp","Anapc10","Anapc11","Anapc2","Ang","Aplp2","Apoe","Arid5a","Arrb1","Arrdc4","Astl","Atg7","Atm","Atraid","Bace2","Bag6","Bak1","Bcar3","Bcl2l12","Bcl3","Bmi1","Bmper","Braf","C2cd3","C5ar2","Cacul1","Camk1","Casp1","Casp2","Casp3","Casp4","…
GO:0051128	4	regulation of cellular component organization	437	2307	279.023	6.9267e-24	8.49352e-22	["1810022K09Rik","2900011O08Rik","Aatk","Abl2","Acaa2","Acd","Acsl4","Acvr1b","Adam15","Adam17","Adamts7","Adgrb2","Adgrl2","Adgrl3","Adipor2","Ahr","Akap6","Alpk1","Amot","Anapc10","Anapc11","Anapc2","Apobec1","Apoe","Appl1","Arhgap24","Arhgdia","Arhgef1","Arhgef10l","Arhgef7","Arid5a","Arl2","Arpc4","Arrb1","Arsb","Atg7","Atm","Atp10a","Atp8b1","Baiap2","Bak1","Bambi","Bcas3","Bcl9l","Blzf1","B…
GO:0043412	5	macromolecule modification	497	2719	328.853	9.2084e-24	1.10699e-21	["Aanat","Aatk","Abca1","Abi3","Abl2","Acvr1b","Acvr2a","Adamts7","Adamtsl1","Adck1","Adora2b","Alg10b","Alg11","Alpk1","Alpk2","Ambp","Anapc10","Anapc11","Anapc2","Ap1s1","Apobec1","Arhgef6","Arrb1","Arsa","Arsb","Ascc1","Ascc3","Atg7","Atm","B3gat3","B3gnt3","B3gnt8","B4galt1","B4galt4","B4galt6","B4gat1","Babam1","Bag6","Bckdk","Bhmt","Blmh","Bmi1","Bmp2k","Braf","Cacul1","Camk1","Camk1d","Cbl…
GO:0006464	6	cellular protein modification process	476	2578	311.799	1.20022e-23	1.3884e-21	["Aanat","Aatk","Abca1","Abi3","Abl2","Acvr1b","Acvr2a","Adamts7","Adamtsl1","Adck1","Adora2b","Alg10b","Alg11","Alpk1","Alpk2","Ambp","Anapc10","Anapc11","Anapc2","Ap1s1","Arhgef6","Arrb1","Arsa","Arsb","Atg7","Atm","B3gat3","B3gnt3","B3gnt8","B4galt1","B4galt4","B4galt6","B4gat1","Babam1","Bag6","Bckdk","Bhmt","Blmh","Bmi1","Bmp2k","Braf","Cacul1","Camk1","Camk1d","Cblb","Cbr1","Cbx4","Cbx8","C…
GO:0036211	5	protein modification process	476	2578	311.799	1.20022e-23	1.3884e-21	["Aanat","Aatk","Abca1","Abi3","Abl2","Acvr1b","Acvr2a","Adamts7","Adamtsl1","Adck1","Adora2b","Alg10b","Alg11","Alpk1","Alpk2","Ambp","Anapc10","Anapc11","Anapc2","Ap1s1","Arhgef6","Arrb1","Arsa","Arsb","Atg7","Atm","B3gat3","B3gnt3","B3gnt8","B4galt1","B4galt4","B4galt6","B4gat1","Babam1","Bag6","Bckdk","Bhmt","Blmh","Bmi1","Bmp2k","Braf","Cacul1","Camk1","Camk1d","Cblb","Cbr1","Cbx4","Cbx8","C…
GO:0032502	2	developmental process	860	5346	646.578	1.2334e-23	1.40036e-21	["2700049A03Rik","Aatk","Abca12","Abca15","Abcb5","Abl2","Acd","Acp5","Acsl4","Acvr1b","Acvr2a","Adam12","Adam15","Adam17","Adam8","Adamts18","Adamts4","Adap2","Adgrb2","Adgrg1","Adgrl2","Adgrl3","Adipor2","Adm","Adora2a","Adra1a","Aebp1","Aes","Agfg1","Agpat2","Agpat5","Ahctf1","Ahr","Aldh1a2","Aldh2","Aldh3a2","Alg10b","Amot","Anapc2","Ang","Angpt2","Angptl2","Angptl4","Antxr1","Anxa3","Apba2",…
GO:0006796	5	phosphate-containing compound metabolic process	371	1876	226.895	1.42471e-23	1.58816e-21	["Aatk","Abhd12","Abi3","Abl2","Acot7","Acp5","Acsl5","Acvr1b","Acvr2a","Adck1","Adcy3","Adcy7","Adcy9","Adm","Adora2a","Adora2b","Adssl1","Agpat1","Agpat2","Agpat5","Akap6","Alpk1","Alpk2","Apoa1bp","Aprt","Arhgef6","Atm","Atp2b2","Atp5d","Atp5g1","Atp6v0a1","Atp6v1a","Bckdk","Bmp2k","Braf","Calcrl","Camk1","Camk1d","Cant1","Ccl3","Ccl5","Cdipt","Cdk15","Cdk18","Cdk19","Cdk2","Cdk20","Cdk8","Cdk…
GO:0023056	5	positive regulation of signaling	314	1515	183.233	3.03824e-23	3.32633e-21	["Abl2","Acvr1b","Acvr2a","Adam17","Adam8","Adgrg1","Adora2a","Adora2b","Adra1a","Agpat1","Agpat2","Akap6","Akr1c18","Arhgef7","Arrb1","Atf3","Atm","Atp2c1","Bak1","Bambi","Blnk","Bmf","Bmper","Braf","C5ar2","Cant1","Car2","Casp1","Casp2","Cc2d1a","Ccdc22","Ccl3","Ccl5","Cd180","Cd28","Cd300lh","Cd38","Cd40","Cd44","Cdk5rap3","Cflar","Cftr","Cib1","Cmtm3","Crebrf","Crk","Csf2","Csf3","Csk","Csnk1…
GO:1902533	7	positive regulation of intracellular signal transduction	205	857	103.651	9.22167e-23	9.91895e-21	["Abl2","Adam8","Adgrg1","Adora2b","Adra1a","Akap6","Akr1c18","Arrb1","Atm","Atp2c1","Bmf","Bmper","Braf","C5ar2","Cant1","Casp1","Cc2d1a","Ccdc22","Ccl3","Ccl5","Cd28","Cd40","Cd44","Cdk5rap3","Cflar","Cib1","Crk","Csf2","Csf3","Csk","Cxcl9","Cxcr3","Cxcr4","Cyp1b1","Ddx5","Ddx60","Dfna5","Dnm1l","Dvl2","Ecm1","Edn1","Eef1e1","Egfr","Eif2ak2","Epha4","Erbb4","Erp29","F10","F2r","F3","Fadd","Fgd4…
GO:0010604	6	positive regulation of macromolecule metabolic process	502	2782	336.472	9.41409e-23	9.95135e-21	["Abhd14b","Abl2","Acd","Acvr1b","Acvr2a","Adam17","Adam8","Adcy3","Adcy7","Adcy9","Adora2b","Adra1a","Aff1","Ahctf1","Ahr","Akap6","Akna","Aldh1a2","Anapc10","Anapc11","Anapc2","Ang","Ankar","Anxa3","Apobec1","Apoe","Arhgef10l","Arid1b","Arid5a","Arid5b","Arrb1","Arrdc4","Astl","Atf3","Atf6b","Atg7","Atmin","Babam1","Bag6","Bak1","Bambi","Batf","Bcar3","Bcas3","Bcl2l12","Bcl3","Bcl9l","Bmi1","Bm…
GO:0006952	4	defense response	284	1336	161.584	9.90235e-23	1.02901e-20	["Abl2","Acp5","Adam15","Adam17","Adam8","Adamts4","Adcy3","Adcy7","Adcy9","Adora2a","Adora2b","Ago3","Ago4","Akt1s1","Anxa3","Aoah","Apobec1","Arpc4","Ass1","Atg7","B2m","B4galt1","Baiap2","Batf","Batf2","Bcl3","Blnk","Brk1","C1qa","C1qb","C1qc","C1ra","C5ar2","Camk1d","Casp1","Casp4","Casp9","Ccl17","Ccl24","Ccl3","Ccl5","Ccr9","Ccrl2","Cd180","Cd28","Cd300e","Cd300lb","Cd37","Cd37 (ENSMUSG0000…
GO:0060255	5	regulation of macromolecule metabolic process	864	5423	655.891	2.05684e-22	2.10175e-20	["0610009O20Rik","Aarsd1","Abca2","Abhd14b","Abl2","Acd","Acvr1b","Acvr2a","Adam17","Adam8","Adcy3","Adcy7","Adcy9","Adora2a","Adora2b","Adra1a","Aebp1","Aes","Aff1","Ago3","Ago4","Ahctf1","Ahnak","Ahr","Akap6","Akna","Akt1s1","Aldh1a2","Ambp","Anapc10","Anapc11","Anapc2","Ang","Ankar","Anp32a","Anxa3","Ap2a1","Apba2","Aplp2","Apobec1","Apoe","Arhgap22","Arhgef10l","Arid1b","Arid5a","Arid5b","Arr…
GO:0051179	2	localization	697	4184	506.039	2.18741e-22	2.19853e-20	["Aagab","Abca1","Abca12","Abca13","Abca15","Abca2","Abcb5","Abcb8","Abcc1","Abcc3","Abcc4","Abcc5","Abcc6","Abcc8","Abcd1","Abl2","Acd","Acsl4","Acsl5","Adcy3","Adcy7","Adcy9","Add3","Adgb","Adm","Adora2a","Adra1a","Agap1","Agap3","Agfg1","Ahctf1","Akap6","Akr1c18","Als2cl","Ambp","Amot","Ank","Anp32a","Anxa3","Ap1b1","Ap1s1","Ap1s3","Ap2a1","Ap3s1","Ap4m1","Ap5b1","Ap5s1","Ap5z1","Apba2","Apobe…
GO:1901564	4	organonitrogen compound metabolic process	283	1337	161.705	2.31502e-22	2.28925e-20	["Aanat","Aarsd1","Abcc1","Abcc5","Abhd12","Acot7","Acp5","Adcy3","Adcy7","Adcy9","Adi1","Adm","Adora2a","Adssl1","Ahcyl2","Alas1","Aldh1l1","Aldh4a1","Ambp","Apeh","Apoa1bp","Apobec1","Aprt","Arg1","Arg2","Arsa","Arsb","Ass1","Atg7","Atp2b2","Atp5d","Atp5g1","Atp6v0a1","Atp6v1a","B3gat3","B3gnt3","B3gnt8","B4galt1","B4galt4","B4galt6","B4gat1","Bace2","Bckdha","Bckdk","Bhmt","Cacna1a","Calcrl","…
GO:0010605	6	negative regulation of macromolecule metabolic process	431	2308	279.144	2.77185e-22	2.69749e-20	["Acd","Acvr1b","Adora2a","Adora2b","Aebp1","Aes","Ago3","Ago4","Ahr","Akt1s1","Ambp","Anapc10","Anapc11","Anapc2","Ang","Ap2a1","Aplp2","Apoe","Arid5a","Arid5b","Arrb1","Atf3","Atg7","Atm","Atp8b1","Atraid","BC094916","Bace2","Bag6","Bahcc1","Bak1","Bcl2l12","Bcl3","Bend6","Bmi1","Casp3","Cbx4","Cbx6","Cbx7","Cbx8","Cby1","Cc2d1a","Cc2d1b","Ccar1","Ccl3","Ccl5","Cd300a","Cd38","Cd44","Cd55","Cda…
GO:0006810	4	transport	632	3717	449.557	2.96115e-22	2.83669e-20	["Aagab","Abca1","Abca12","Abca13","Abca15","Abca2","Abcb5","Abcb8","Abcc1","Abcc3","Abcc4","Abcc5","Abcc6","Abcc8","Abcd1","Abl2","Acd","Acsl4","Acsl5","Adcy3","Adcy7","Adcy9","Add3","Adgb","Adm","Adora2a","Adra1a","Agap1","Agap3","Agfg1","Ahctf1","Akap6","Akr1c18","Ambp","Ank","Anp32a","Anxa3","Ap1b1","Ap1s1","Ap1s3","Ap2a1","Ap3s1","Ap4m1","Ap5b1","Ap5s1","Ap5z1","Apba2","Apobec1","Apoe","Aprt…
GO:0032268	6	regulation of cellular protein metabolic process	433	2327	281.442	4.43544e-22	4.18365e-20	["Aarsd1","Abl2","Acvr1b","Acvr2a","Adam17","Adam8","Adcy3","Adcy7","Adcy9","Adora2a","Adora2b","Adra1a","Ago3","Ago4","Akap6","Akt1s1","Ambp","Anapc10","Anapc11","Anapc2","Ang","Aplp2","Apoe","Arid5a","Arrb1","Arrdc4","Astl","Atg7","Atm","Atraid","Bag6","Bak1","Bcar3","Bcl2l12","Bcl3","Bmi1","Bmper","Braf","C5ar2","Cacul1","Camk1","Casp1","Casp2","Casp3","Casp4","Casp7","Casp9","Ccdc22","Ccl3","…
GO:0051234	3	establishment of localization	647	3834	463.708	5.37413e-22	4.99224e-20	["Aagab","Abca1","Abca12","Abca13","Abca15","Abca2","Abcb5","Abcb8","Abcc1","Abcc3","Abcc4","Abcc5","Abcc6","Abcc8","Abcd1","Abl2","Acd","Acsl4","Acsl5","Adcy3","Adcy7","Adcy9","Add3","Adgb","Adm","Adora2a","Adra1a","Agap1","Agap3","Agfg1","Ahctf1","Akap6","Akr1c18","Ambp","Ank","Anp32a","Anxa3","Ap1b1","Ap1s1","Ap1s3","Ap2a1","Ap3s1","Ap4m1","Ap5b1","Ap5s1","Ap5z1","Apba2","Apobec1","Apoe","Aprt…
GO:0065008	3	regulation of biological quality	532	3015	364.653	5.91764e-22	5.41508e-20	["Aanat","Aarsd1","Abca1","Abca12","Abca2","Abcb5","Abcc4","Abl2","Acaa2","Acd","Acp5","Adcy3","Adcy7","Adcy9","Adipor2","Adm","Adora2a","Adra1a","Ahr","Akap6","Akr1c18","Akt1s1","Aldh1a2","Aldh2","Amot","Anapc2","Ang","Angpt2","Angptl4","Aplp2","Apobec1","Apoe","Aprt","Aqp9","Arhgdia","Arl2","Arpc4","Arrb1","Aspscr1","Atg7","Atm","Atox1","Atp10a","Atp1a2","Atp1a3","Atp1b3","Atp2b2","Atp2c1","Atp…
GO:0002684	5	positive regulation of immune system process	205	873	105.586	9.81618e-22	8.85044e-20	["Abcb5","Acvr1b","Acvr2a","Adam17","Adam8","Adora2b","Arpc4","B2m","Baiap2","Bmi1","Brk1","Bst1","C1qa","C1qb","C1qc","C1ra","Cacnb3","Cadm1","Camk1d","Car2","Cblb","Ccl24","Ccl3","Ccl5","Cd274","Cd28","Cd300a","Cd300lb","Cd300lh","Cd37","Cd37 (ENSMUSG00000109208)","Cd38","Cd40","Cd44","Cd55","Cdkn1a","Cfb","Cmklr1","Cmtm3","Cnpy3","Coro1a","Crk","Csf2","Csf3","Csk","Ctnnbip1","Ctsb","Ctsl","Cul…
GO:0006955	3	immune response	248	1136	137.395	1.67621e-21	1.4894e-19	["Abl2","Adam15","Adam17","Adcy3","Adcy7","Adcy9","Ago3","Ago4","Akt1s1","Aqp9","Arpc4","B2m","Baiap2","Bcl3","Blnk","Bmi1","Brk1","Bst1","C1qa","C1qb","C1qc","C1ra","Cadm1","Casp1","Casp9","Cblb","Ccl17","Ccl24","Ccl3","Ccl5","Ccr9","Cd164","Cd180","Cd274","Cd28","Cd300e","Cd300lb","Cd55","Cdkn1a","Cfb","Cmklr1","Cnpy3","Cnr2","Coro1a","Crk","Crlf2","Csf2","Csf3","Csk","Ctsb","Ctsc","Ctsl","Cul1…
GO:0010941	5	regulation of cell death	330	1662	201.013	3.14927e-21	2.75831e-19	["0610009O20Rik","Abcc1","Abl2","Acaa2","Acsl5","Adam17","Adam8","Adm","Adora2a","Aes","Ahr","Akr1c18","Akt1s1","Aldh1a2","Aldh2","Angptl4","Apoe","Arhgdia","Arhgef1","Arhgef3","Arhgef6","Arhgef7","Arrb1","Atf3","Atg7","Atm","B4galt1","Bag6","Bak1","Bcl2a1b","Bcl2l12","Bcl3","Bmf","Bmi1","Braf","Cacna1a","Camk1d","Casp1","Casp2","Casp3","Casp4","Casp7","Casp9","Cbx4","Ccar1","Ccl3","Ccl5","Cd274"…
GO:1901135	4	carbohydrate derivative metabolic process	188	792	95.7894	1.50788e-20	1.30209e-18	["Abcc5","Abhd12","Acot7","Adamts12","Adcy3","Adcy7","Adcy9","Adm","Adora2a","Adssl1","Ahcyl2","Akr1c18","Akr7a5","Alg10b","Alg11","Amdhd2","Aoah","Apobec1","Aprt","Arsa","Arsb","Atp2b2","Atp5d","Atp5g1","Atp6v0a1","Atp6v1a","B3gat3","B3gnt3","B3gnt8","B4galt1","B4galt4","B4galt6","B4gat1","Bhmt","Calcrl","Cant1","Cd44","Cemip","Cerk","Chchd10","Chia1","Chst12","Chst14","Chst3","Cln6","Cmas","Coa…
GO:0051270	5	regulation of cellular component movement	177	730	88.2907	1.98786e-20	1.69272e-18	["2900011O08Rik","Abcc1","Abhd2","Abi3","Abl2","Acp5","Acvr1b","Adam15","Adam17","Adam8","Adgrg1","Akap6","Amot","Angpt2","Anxa3","Apoe","Arhgdia","Arhgef7","Arsb","Atp1a2","B4galt1","Bcas3","Bmper","Braf","C5ar2","Camk1d","Ccar1","Ccl24","Ccl3","Ccl5","Ccsap","Cd274","Cd300a","Cemip","Chst3","Cib1","Cmklr1","Coro1a","Crk","Cxcl1","Cxcl9","Cxcr3","Cxcr4","Cyp1b1","Dag1","Dock10","Ecm1","Edn1","Eg…
GO:0009058	3	biosynthetic process	665	4021	486.325	2.11661e-20	1.77766e-18	["Aanat","Aarsd1","Abca1","Abcc5","Abtb1","Acaa2","Accs","Acot7","Acsl4","Acsl5","Acss1","Adcy3","Adcy7","Adcy9","Adi1","Adm","Adora2a","Adssl1","Aebp1","Aes","Aff1","Agpat1","Agpat2","Agpat5","Ahctf1","Ahr","Akna","Akr1c18","Alas1","Aldh1a2","Aldh1l1","Aldh2","Aldh4a1","Alg10b","Alg11","Alox5ap","Ang","Anp32a","Apobec1","Apoe","Aprt","Arg1","Arg2","Arhgap22","Arid1b","Arid5a","Arid5b","Arrb1","A…
GO:0043067	6	regulation of programmed cell death	309	1556	188.192	6.82399e-20	5.65377e-18	["0610009O20Rik","Abl2","Acaa2","Acsl5","Adam17","Adam8","Adm","Adora2a","Aes","Akr1c18","Akt1s1","Aldh1a2","Aldh2","Angptl4","Apoe","Arhgdia","Arhgef3","Arhgef6","Arhgef7","Arrb1","Atf3","Atg7","Atm","B4galt1","Bag6","Bak1","Bcl2a1b","Bcl2l12","Bcl3","Bmf","Bmi1","Braf","Cacna1a","Camk1d","Casp1","Casp2","Casp3","Casp4","Casp7","Casp9","Cbx4","Ccar1","Ccl3","Ccl5","Cd274","Cd38","Cd40","Cd44","C…
GO:0042981	7	regulation of apoptotic process	305	1540	186.257	1.8526e-19	1.51444e-17	["0610009O20Rik","Abl2","Acaa2","Acsl5","Adam17","Adam8","Adm","Adora2a","Aes","Akr1c18","Akt1s1","Aldh1a2","Aldh2","Angptl4","Apoe","Arhgdia","Arhgef3","Arhgef6","Arhgef7","Arrb1","Atf3","Atg7","Atm","B4galt1","Bag6","Bak1","Bcl2a1b","Bcl2l12","Bcl3","Bmf","Bmi1","Braf","Cacna1a","Camk1d","Casp1","Casp2","Casp3","Casp4","Casp7","Casp9","Cbx4","Ccar1","Ccl3","Ccl5","Cd274","Cd38","Cd40","Cd44","C…
GO:0016043	3	cellular component organization	762	4778	577.881	2.2833e-19	1.84196e-17	["0610010K14Rik","2700049A03Rik","Abca1","Abca12","Abcd1","Abl2","Acaa2","Acads","Acd","Adam15","Adam17","Adam8","Adamts4","Adcy3","Adm","Adora2a","Agap3","Agfg1","Ago3","Ago4","Ahctf1","Ahnak","Ahr","Akt1s1","Alas1","Alox5ap","Als2cl","Amot","Anapc10","Anapc11","Anapc2","Ang","Angptl4","Antxr1","Ap1b1","Ap1s1","Ap1s3","Ap4m1","Aplp2","Apoa1bp","Apoe","Arg1","Arhgef6","Arhgef7","Arid1b","Arid5b",…
GO:1901576	4	organic substance biosynthetic process	648	3936	476.044	2.49724e-19	1.98839e-17	["Aanat","Aarsd1","Abca1","Abcc5","Abtb1","Acaa2","Acot7","Acsl4","Acsl5","Acss1","Adcy3","Adcy7","Adcy9","Adi1","Adm","Adora2a","Adssl1","Aebp1","Aes","Aff1","Agpat1","Agpat2","Agpat5","Ahctf1","Ahr","Akna","Akr1c18","Alas1","Aldh1a2","Aldh1l1","Aldh4a1","Alg10b","Alg11","Alox5ap","Ang","Anp32a","Apobec1","Apoe","Aprt","Arg1","Arg2","Arhgap22","Arid1b","Arid5a","Arid5b","Arrb1","Ascc1","Ascc3","…
GO:0006807	3	nitrogen compound metabolic process	767	4818	582.719	2.64658e-19	2.08028e-17	["Aanat","Aarsd1","Abcc1","Abcc5","Abhd12","Acd","Acot7","Acp5","Adcy3","Adcy7","Adcy9","Adi1","Adm","Adora2a","Adssl1","Aebp1","Aes","Aff1","Ago3","Ago4","Ahctf1","Ahcyl2","Ahr","Akna","Akr1c18","Akr7a5","Alas1","Aldh1l1","Aldh4a1","Ambp","Ang","Anp32a","Ap1s1","Ap5s1","Ap5z1","Apeh","Apoa1bp","Apobec1","Aprt","Arg1","Arg2","Arhgap22","Arid1b","Arid5a","Arid5b","Arrb1","Arsa","Arsb","Ascc1","Asc…
GO:0030334	6	regulation of cell migration	158	638	77.1637	2.80312e-19	2.17543e-17	["2900011O08Rik","Abcc1","Abhd2","Abi3","Acp5","Acvr1b","Adam15","Adam17","Adam8","Adgrg1","Amot","Angpt2","Anxa3","Apoe","Arhgdia","Arhgef7","Arsb","Bcas3","Bmper","Braf","C5ar2","Camk1d","Ccar1","Ccl24","Ccl3","Ccl5","Cd274","Cd300a","Cemip","Cib1","Cmklr1","Coro1a","Cxcl1","Cxcl9","Cxcr3","Cxcr4","Cyp1b1","Dag1","Dock10","Ecm1","Edn1","Egfr","Erbb4","F10","F2r","F3","Fadd","Flcn","Flt1","Fn1",…
GO:0044249	4	cellular biosynthetic process	627	3791	458.507	4.21005e-19	3.22648e-17	["Aanat","Aarsd1","Abca1","Abtb1","Acot7","Acsl4","Acsl5","Acss1","Adcy3","Adcy7","Adcy9","Adi1","Adm","Adora2a","Adssl1","Aebp1","Aes","Aff1","Agpat1","Agpat2","Agpat5","Ahctf1","Ahr","Akna","Akr1c18","Alas1","Aldh1a2","Aldh1l1","Aldh2","Aldh4a1","Alox5ap","Ang","Anp32a","Apobec1","Apoe","Aprt","Arg1","Arg2","Arhgap22","Arid1b","Arid5a","Arid5b","Arrb1","Ascc1","Ascc3","Ass1","Atf3","Atf6b","Atg…
GO:2000145	5	regulation of cell motility	164	675	81.6387	4.28446e-19	3.24296e-17	["2900011O08Rik","Abcc1","Abhd2","Abi3","Abl2","Acp5","Acvr1b","Adam15","Adam17","Adam8","Adgrg1","Amot","Angpt2","Anxa3","Apoe","Arhgdia","Arhgef7","Arsb","Bcas3","Bmper","Braf","C5ar2","Camk1d","Ccar1","Ccl24","Ccl3","Ccl5","Ccsap","Cd274","Cd300a","Cemip","Cib1","Cmklr1","Coro1a","Cxcl1","Cxcl9","Cxcr3","Cxcr4","Cyp1b1","Dag1","Dock10","Ecm1","Edn1","Egfr","Erbb4","F10","F2r","F3","Fadd","Fes"…
GO:0071840	2	cellular component organization or biogenesis	768	4836	584.896	4.79806e-19	3.58743e-17	["0610010K14Rik","2700049A03Rik","Abca1","Abca12","Abcd1","Abl2","Acaa2","Acads","Acd","Adam15","Adam17","Adam8","Adamts4","Adcy3","Adm","Adora2a","Agap3","Agfg1","Ago3","Ago4","Ahctf1","Ahnak","Ahr","Akt1s1","Alas1","Alox5ap","Als2cl","Amot","Anapc10","Anapc11","Anapc2","Ang","Angptl4","Antxr1","Ap1b1","Ap1s1","Ap1s3","Ap4m1","Aplp2","Apoa1bp","Apoe","Arg1","Arhgef6","Arhgef7","Arid1b","Arid5b",…
GO:0009889	5	regulation of biosynthetic process	640	3890	470.481	5.42402e-19	4.00658e-17	["Aarsd1","Abca1","Abca2","Abhd14b","Acd","Acp5","Acsl5","Acvr1b","Acvr2a","Adam8","Adcy3","Adcy7","Adcy9","Adm","Adora2a","Adora2b","Aebp1","Aes","Aff1","Ago3","Ago4","Ahctf1","Ahr","Akap6","Akna","Akr1c18","Ang","Ankar","Anp32a","Anxa3","Ap2a1","Apobec1","Apoe","Arg2","Arhgap22","Arhgef10l","Arid1b","Arid5a","Arid5b","Arrb1","Ascc1","Ascc3","Ass1","Atf3","Atf6b","Atmin","Atp8b1","BC094916","Bac…
GO:0031399	7	regulation of protein modification process	311	1592	192.546	6.42565e-19	4.66887e-17	["Abl2","Acvr1b","Acvr2a","Adam17","Adam8","Adcy3","Adcy7","Adcy9","Adora2a","Adora2b","Adra1a","Akap6","Akt1s1","Ambp","Anapc10","Anapc11","Anapc2","Ang","Aplp2","Apoe","Arid5a","Arrb1","Arrdc4","Atg7","Atm","Bak1","Bcar3","Bmi1","Bmper","Braf","C5ar2","Cacul1","Camk1","Casp3","Ccdc22","Ccl3","Ccl5","Ccnb3","Ccnyl1","Cd300a","Cd300lh","Cd40","Cd44","Cdk2","Cdk5rap3","Cdkn1a","Cebpa","Cemip","Cho…
GO:0048585	5	negative regulation of response to stimulus	272	1339	161.947	6.47291e-19	4.66887e-17	["Abl2","Acaa2","Acp5","Adam17","Adamts12","Adamts18","Adora2a","Adra1a","Aes","Akt1s1","Ambp","Angpt2","Aoah","Ap2a1","Apoe","Arhgap24","Arhgef1","Arhgef7","Arrb1","Bambi","Bcl2a1b","Bcl2l12","Bcl9l","Bend6","Bmf","Bmi1","Bmper","C5ar2","Calcrl","Cblb","Cby1","Ccdc22","Ccl5","Cd300a","Cd44","Cd55","Cflar","Cib1","Cish","Clec2d","Cnr2","Crebrf","Csf2","Csk","Csnk1e","Ctdspl2","Ctla2a","Ctnnbip1",…
GO:0051247	7	positive regulation of protein metabolic process	288	1448	175.13	1.17076e-18	8.34646e-17	["Abl2","Acvr1b","Acvr2a","Adam17","Adam8","Adcy3","Adcy7","Adcy9","Adora2b","Adra1a","Akap6","Anapc10","Anapc11","Anapc2","Ang","Apoe","Arid5a","Arrb1","Arrdc4","Astl","Atg7","Bag6","Bak1","Bcar3","Bcl3","Bmi1","Bmper","Braf","C5ar2","Cacul1","Camk1","Casp1","Casp2","Casp3","Casp4","Casp7","Casp9","Cblb","Ccdc22","Ccl3","Ccl5","Cd28","Cd300lh","Cd40","Cd44","Cdk5rap3","Cdkn1a","Cebpa","Cemip","C…
GO:0010942	6	positive regulation of cell death	163	676	81.7596	1.21119e-18	8.5354e-17	["Adam8","Adm","Adora2a","Aes","Akr1c18","Aldh1a2","Apoe","Arhgef3","Arhgef6","Arhgef7","Arrb1","Atf3","Atg7","Atm","B4galt1","Bak1","Bmf","Camk1d","Casp1","Casp2","Casp3","Casp4","Casp7","Casp9","Ccar1","Ccl3","Ccl5","Cd40","Cd44","Cdk19","Cdkn1a","Cflar","Ctsc","Cxcr3","Cyp1b1","Dapk1","Dcun1d3","Dedd2","Dfna5","Dhodh","Dnm1l","Dnmt3a","Dusp1","Dynll2","E2f1","Eef1e1","Egr1","Eif2ak2","Epha7","…
GO:0050776	5	regulation of immune response	188	825	99.7806	1.61313e-18	1.12387e-16	["Adam8","Adora2b","Ago3","Ago4","Akt1s1","Ambp","Arpc4","B2m","Baiap2","Brk1","C1qa","C1qb","C1qc","C1ra","Cacnb3","Cadm1","Casp9","Ccl5","Cd28","Cd300a","Cd37","Cd37 (ENSMUSG00000109208)","Cd38","Cd40","Cd44","Cd55","Cdkn1a","Cfb","Clec2d","Cnpy3","Crk","Csk","Ctsb","Ctsl","Cul1","Cyfip1","Dusp3","Dusp7","Ecm1","Egfr","Elmo2","Erap1","Erbb4","Fadd","Fcgr2b","Fcgr3","Fcgrt","Fcrlb","Fes","Fgfr2"…
GO:0042127	5	regulation of cell proliferation	309	1591	192.425	2.0374e-18	1.40351e-16	["Abcc4","Abl2","Adam17","Adgrg1","Adm","Adora2a","Adora2b","Adra1a","Ago3","Ahr","Akr1c18","Aldh1a2","Ang","Apobec1","Apoe","Arg1","Atf3","Atm","Atraid","B4galt1","Bag6","Bak1","Bambi","Bmi1","Braf","Brk1","Bst1","C5ar2","Cacul1","Calcrl","Capn1","Casp3","Cblb","Cbx8","Ccar1","Ccl24","Ccl5","Ccpg1","Cd164","Cd274","Cd28","Cd300a","Cd33","Cd37","Cd37 (ENSMUSG00000109208)","Cd38","Cd40","Cd55","Cd…
GO:0043065	8	positive regulation of apoptotic process	155	634	76.6799	2.25254e-18	1.53448e-16	["Adam8","Adm","Adora2a","Aes","Akr1c18","Aldh1a2","Arhgef3","Arhgef6","Arhgef7","Arrb1","Atf3","Atg7","Atm","B4galt1","Bak1","Bmf","Camk1d","Casp1","Casp2","Casp3","Casp4","Casp7","Casp9","Ccar1","Ccl3","Ccl5","Cd40","Cd44","Cdk19","Cflar","Ctsc","Cxcr3","Cyp1b1","Dapk1","Dcun1d3","Dedd2","Dfna5","Dhodh","Dnm1l","Dusp1","Dynll2","E2f1","Eef1e1","Egr1","Eif2ak2","Epha7","F2r","F3","Fadd","Fgd2","…
GO:0043068	7	positive regulation of programmed cell death	156	640	77.4056	2.34883e-18	1.58249e-16	["Adam8","Adm","Adora2a","Aes","Akr1c18","Aldh1a2","Arhgef3","Arhgef6","Arhgef7","Arrb1","Atf3","Atg7","Atm","B4galt1","Bak1","Bmf","Camk1d","Casp1","Casp2","Casp3","Casp4","Casp7","Casp9","Ccar1","Ccl3","Ccl5","Cd40","Cd44","Cdk19","Cdkn1a","Cflar","Ctsc","Cxcr3","Cyp1b1","Dapk1","Dcun1d3","Dedd2","Dfna5","Dhodh","Dnm1l","Dusp1","Dynll2","E2f1","Eef1e1","Egr1","Eif2ak2","Epha7","F2r","F3","Fadd"…
GO:0040012	4	regulation of locomotion	174	746	90.2259	2.84856e-18	1.89832e-16	["2900011O08Rik","Abcc1","Abhd2","Abi3","Abl2","Acp5","Acvr1b","Adam15","Adam17","Adam8","Adgrg1","Adora2a","Amot","Angpt2","Anxa3","Apoe","Arhgdia","Arhgef7","Arsb","Bcas3","Bmper","Braf","C5ar2","Camk1d","Ccar1","Ccl24","Ccl3","Ccl5","Ccsap","Cd274","Cd300a","Cemip","Cib1","Cmklr1","Coro1a","Cxcl1","Cxcl9","Cxcr3","Cxcr4","Cyp1b1","Dag1","Dock10","Ecm1","Edn1","Egfr","Erbb4","F10","F2r","F3","F…
GO:0031326	6	regulation of cellular biosynthetic process	629	3838	464.191	3.10848e-18	2.04925e-16	["Aarsd1","Abca1","Abca2","Abhd14b","Acd","Acp5","Acsl5","Acvr1b","Acvr2a","Adam8","Adcy3","Adcy7","Adcy9","Adm","Adora2a","Adora2b","Aebp1","Aes","Aff1","Ago3","Ago4","Ahctf1","Ahr","Akap6","Akna","Akr1c18","Ang","Ankar","Anp32a","Anxa3","Apobec1","Apoe","Arg2","Arhgap22","Arhgef10l","Arid1b","Arid5a","Arid5b","Arrb1","Ascc1","Ascc3","Ass1","Atf3","Atf6b","Atmin","Atp8b1","BC094916","Bace2","Bah…
GO:0051239	4	regulation of multicellular organismal process	462	2641	319.419	3.51151e-18	2.29032e-16	["2900011O08Rik","Aatk","Abl2","Acp5","Acvr1b","Acvr2a","Adam17","Adam8","Adamts12","Adamts18","Adamts7","Adgrb2","Adgrg1","Adgrl2","Adgrl3","Adm","Adora2a","Adora2b","Adra1a","Agpat1","Agpat2","Ahr","Akap6","Amot","Anapc2","Angpt2","Angptl4","Ank","Anxa3","Apoe","Arg2","Arhgdia","Arhgef1","Arrb1","Arsb","Astl","Atg7","Atp1a2","Atraid","B4galt1","Baiap2","Bambi","Bcas3","Bcl3","Bcl9l","Bend6","Bm…
GO:0033554	4	cellular response to stress	303	1559	188.555	4.12531e-18	2.66235e-16	["Acaa2","Acd","Adam8","Adm","Adora2b","Adprhl2","Agap3","Ago3","Ago4","Akr1c18","Akt1s1","Anapc10","Anapc11","Anapc2","Angptl4","Ap1s1","Ap5s1","Ap5z1","Apoe","Arg1","Arhgef10l","Arhgef6","Arpp21","Ascc1","Ascc3","Ass1","Atf3","Atf6b","Atg2a","Atg7","Atm","Atmin","Atox1","Babam1","Bag6","Bak1","Batf","Bcl2a1b","Bcl3","Bmi1","C77370","Calu","Car2","Casp2","Casp3","Casp4","Casp9","Cbx4","Cbx6","Cb…
GO:0051338	5	regulation of transferase activity	199	904	109.335	8.30162e-18	5.3018e-16	["Acd","Adam17","Adam8","Adcy3","Adcy7","Adcy9","Adora2a","Adora2b","Akap6","Akt1s1","Anapc10","Anapc11","Anapc2","Ang","Aplp2","Apoe","Arrb1","Arrdc4","Atm","Bak1","Bmi1","Braf","Cacul1","Camk1","Casp3","Ccl5","Ccnb3","Ccnyl1","Cd300a","Cd40","Cd44","Cdk2","Cdk5rap3","Cdkn1a","Cebpa","Cemip","Chchd10","Chordc1","Cib1","Cish","Cln8","Crk","Csk","Cul1","Cxcr4","Deptor","Dusp1","Dusp16","Dusp2","Du…
GO:0050793	4	regulation of developmental process	422	2374	287.126	8.68653e-18	5.49042e-16	["2900011O08Rik","Aatk","Abca1","Abl2","Acvr1b","Acvr2a","Adam8","Adamts12","Adamts7","Adgrb2","Adgrg1","Adgrl2","Adgrl3","Adm","Adora2b","Ahr","Akap6","Amot","Anapc2","Angpt2","Angptl4","Ank","Ankar","Anxa3","Apoe","Arhgdia","Arhgef1","Arhgef7","Arsb","Atg7","Atp10a","Atraid","B4galt1","Baiap2","Bambi","Bcl2l12","Bcl9l","Bend6","Bmi1","Bmp1","Bmp2k","Boc","Braf","Brinp1","Brinp3","C1qc","Cacna1a…
GO:0009056	3	catabolic process	322	1695	205.004	1.04768e-17	6.55442e-16	["Abcd1","Abhd12","Abhd4","Acaa2","Acads","Acot2","Acot7","Acox3","Adam15","Adam17","Adamts12","Agap3","Ago3","Ago4","Akr1c18","Aldh1l1","Aldh2","Aldh4a1","Ambp","Amdhd2","Anapc10","Anapc11","Anapc2","Ap1s1","Apobec1","Apoe","Arg1","Arg2","Arrb1","Arsa","Arsb","Atg101","Atg2a","Atg7","Atg9b","Atm","Bace2","Bag6","Bckdha","Bckdk","Bhmt","Bscl2","Cacul1","Cant1","Capn1","Casp3","Cbr1","Cbr3","Cd44"…
GO:0010556	6	regulation of macromolecule biosynthetic process	596	3626	438.551	1.82979e-17	1.13318e-15	["Aarsd1","Abca2","Abhd14b","Acd","Acvr1b","Acvr2a","Adam8","Adora2a","Adora2b","Aebp1","Aes","Aff1","Ago3","Ago4","Ahctf1","Ahr","Akna","Ang","Ankar","Anp32a","Anxa3","Ap2a1","Apobec1","Arhgap22","Arhgef10l","Arid1b","Arid5a","Arid5b","Arrb1","Ascc1","Ascc3","Atf3","Atf6b","Atmin","Atp8b1","BC094916","Bace2","Bahcc1","Bambi","Batf","Batf2","Baz1a","Bcas3","Bcl2l12","Bcl3","Bcl9l","Bdp1","Bend6",…
GO:1902578	3	single-organism localization	530	3152	381.222	2.34777e-17	1.43942e-15	["Abca1","Abca12","Abca13","Abca15","Abca2","Abcb5","Abcb8","Abcc1","Abcc3","Abcc4","Abcc5","Abcc6","Abcc8","Abcd1","Abl2","Acsl4","Acsl5","Adcy3","Adcy7","Adcy9","Add3","Adgb","Adm","Adora2a","Adra1a","Agap3","Akap6","Akr1c18","Ank","Anxa3","Ap1b1","Ap1s1","Ap1s3","Ap2a1","Ap3s1","Ap4m1","Ap5b1","Ap5s1","Ap5z1","Apba2","Apobec1","Apoe","Aprt","Aqp9","Arl2","Arl4c","Arrb1","Arsb","Atox1","Atp10a"…
GO:0032270	7	positive regulation of cellular protein metabolic process	268	1355	163.882	4.51545e-17	2.74101e-15	["Abl2","Acvr1b","Acvr2a","Adam17","Adam8","Adcy3","Adcy7","Adcy9","Adora2b","Adra1a","Akap6","Anapc10","Anapc11","Anapc2","Ang","Apoe","Arid5a","Arrb1","Arrdc4","Astl","Atg7","Bag6","Bak1","Bcar3","Bcl3","Bmi1","Bmper","Braf","C5ar2","Cacul1","Camk1","Casp1","Casp2","Casp3","Casp4","Casp7","Casp9","Ccdc22","Ccl3","Ccl5","Cd28","Cd300lh","Cd40","Cd44","Cdk5rap3","Cdkn1a","Cebpa","Cemip","Cflar","…
GO:0044765	3	single-organism transport	500	2950	356.791	5.47729e-17	3.29228e-15	["Abca1","Abca12","Abca13","Abca15","Abca2","Abcb5","Abcb8","Abcc1","Abcc3","Abcc4","Abcc5","Abcc6","Abcc8","Abcd1","Abl2","Acsl4","Acsl5","Adcy3","Adcy7","Adcy9","Add3","Adgb","Adm","Adora2a","Adra1a","Agap3","Akap6","Akr1c18","Ank","Anxa3","Ap1b1","Ap1s1","Ap1s3","Ap2a1","Ap3s1","Ap4m1","Ap5b1","Ap5s1","Ap5z1","Apba2","Apobec1","Apoe","Aprt","Aqp9","Arl2","Arl4c","Arrb1","Arsb","Atox1","Atp10a"…
GO:0010648	6	negative regulation of cell communication	241	1190	143.926	1.14804e-16	6.8336e-15	["Abcc8","Abl2","Acaa2","Adam17","Adamts12","Adra1a","Aes","Akt1s1","Ambp","Ap2a1","Apoe","Arhgap24","Arhgef1","Arhgef7","Arrb1","Bambi","Bcl2a1b","Bcl2l12","Bcl9l","Bend6","Bmf","Bmi1","Bmper","Braf","Cblb","Cby1","Ccdc22","Ccl5","Cd300a","Cd38","Cd44","Cflar","Cib1","Cish","Cnr2","Crebrf","Csf2","Csk","Csnk1e","Ctdspl2","Ctnnbip1","D930015E06Rik","Dag1","Dapk1","Deptor","Dgkz","Dhrs3","Draxin",…
GO:0031347	6	regulation of defense response	171	757	91.5563	1.49455e-16	8.81064e-15	["1810022K09Rik","Acp5","Adam8","Adamts12","Adora2a","Adora2b","Alox5ap","Alpk1","Aoah","Ap1b1","Ap1s1","Ap1s3","Ap2a1","Apoe","B2m","Cadm1","Calcrl","Casp1","Casp4","Ccl24","Ccl3","Ccl5","Cd28","Cd37","Cd37 (ENSMUSG00000109208)","Cd55","Cd93","Cdk19","Cfb","Chaf1b","Chst3","Clec2d","Cnpy3","Cnr2","Ctla2a","Ctsb","Ctsl","Cul1","Cxcl1","Cyba","D430041D05Rik","Ddx60","Dusp3","Dusp7","Egfr","Eif2ak2…
GO:0009605	3	response to external stimulus	302	1592	192.546	1.53638e-16	8.971e-15	["Aanat","Abca1","Abcc3","Abcc5","Abcc8","Abhd12","Acads","Acot2","Acp5","Acsl4","Acsl5","Adam17","Adamts4","Adipor2","Adm","Adora2b","Adra1a","Adssl1","Aes","Alas1","Aldh1a2","Aldh2","Angpt2","Angptl4","Anxa3","Ap1s1","Apobec1","Apoe","Arg1","Arg2","Arhgdia","Arrb1","Arsa","Arsb","Ass1","Atf3","Atg2a","Atg7","Atp1a2","Atp2b2","B2m","Baiap2","Bak1","Batf","Batf2","Bcas3","Bckdha","Bcl3","Cacna1a"…
GO:0009968	6	negative regulation of signal transduction	220	1060	128.203	1.67591e-16	9.69338e-15	["Abl2","Acaa2","Adam17","Adamts12","Adra1a","Aes","Akt1s1","Ambp","Ap2a1","Apoe","Arhgap24","Arhgef1","Arhgef7","Arrb1","Bambi","Bcl2a1b","Bcl2l12","Bcl9l","Bend6","Bmf","Bmi1","Bmper","Cblb","Cby1","Ccdc22","Ccl5","Cd300a","Cd44","Cflar","Cib1","Cish","Crebrf","Csf2","Csk","Csnk1e","Ctdspl2","Ctnnbip1","D930015E06Rik","Dag1","Dapk1","Deptor","Dgkz","Dhrs3","Draxin","Dusp1","Dusp16","Dusp2","Dus…
GO:0006954	5	inflammatory response	116	443	53.5792	2.38301e-16	1.36544e-14	["Adam8","Adora2a","Aoah","Ass1","B4galt1","Blnk","C5ar2","Camk1d","Casp4","Ccl17","Ccl24","Ccl3","Ccl5","Ccrl2","Cd180","Cd40","Cd44","Cebpa","Cela1","Chia1","Cnr2","Crlf2","Cxcl1","Cxcl9","Cxcr3","Cxcr4","Cyba","Cybb","Cysltr1","Ecm1","F11r","F2r","Fcgr3","Fn1","Fpr2","Gja1","Hck","Hdac5","Hfe","Hp","Hyal1","Icam1","Igfbp4","Il18","Il19","Il1a","Il1b","Il1f9","Il1rl2","Il20rb","Il23a","Il27","I…
GO:0009890	6	negative regulation of biosynthetic process	279	1446	174.888	2.7426e-16	1.55693e-14	["Acd","Acp5","Adora2b","Aebp1","Aes","Ago3","Ago4","Ahr","Akap6","Akr1c18","Ang","Ap2a1","Apoe","Arid5a","Arid5b","Arrb1","Atf3","Atp8b1","BC094916","Bace2","Bahcc1","Bcl3","Bend6","Bmi1","Cacna1a","Cbx4","Cbx6","Cbx7","Cbx8","Cby1","Cc2d1a","Cc2d1b","Ccar1","Ccl3","Ccl5","Cd38","Cdan1","Cdk5rap3","Cebpa","Cela1","Chek2","Cipc","Cmklr1","Cops2","Crebrf","Ctnnbip1","Cyp1b1","Dapk1","Ddx5","Deaf1"…
GO:0010558	7	negative regulation of macromolecule biosynthetic process	265	1357	164.124	3.61265e-16	2.03203e-14	["Acd","Adora2b","Aebp1","Aes","Ago3","Ago4","Ahr","Ang","Ap2a1","Arid5a","Arid5b","Arrb1","Atf3","Atp8b1","BC094916","Bace2","Bahcc1","Bcl3","Bend6","Bmi1","Cbx4","Cbx6","Cbx7","Cbx8","Cby1","Cc2d1a","Cc2d1b","Ccar1","Ccl3","Ccl5","Cd38","Cdan1","Cdk5rap3","Cebpa","Cela1","Chek2","Cipc","Cmklr1","Cops2","Crebrf","Ctnnbip1","Cyp1b1","Dapk1","Ddx5","Deaf1","Dedd2","Dnajb6","Dnajc2","Dnmt1","Dnmt3a…
GO:0023057	5	negative regulation of signaling	238	1182	142.958	3.64972e-16	2.03422e-14	["Abcc8","Abl2","Acaa2","Adam17","Adamts12","Adra1a","Aes","Akt1s1","Ambp","Ap2a1","Apoe","Arhgap24","Arhgef1","Arhgef7","Arrb1","Bambi","Bcl2a1b","Bcl2l12","Bcl9l","Bend6","Bmf","Bmi1","Bmper","Braf","Cblb","Cby1","Ccdc22","Ccl5","Cd300a","Cd38","Cd44","Cflar","Cib1","Cish","Cnr2","Crebrf","Csf2","Csk","Csnk1e","Ctdspl2","Ctnnbip1","D930015E06Rik","Dag1","Dapk1","Deptor","Dgkz","Dhrs3","Draxin",…
GO:0016265	3	death	195	914	110.545	5.48622e-16	3.03027e-14	["Aatk","Adam15","Adora2a","Adra1a","Ahr","Appl1","Arg2","Arhgef6","Atm","Bag6","Bak1","Bcap29","Bcl2l12","Bmf","Brinp1","Cacna1a","Cadm1","Casp1","Casp2","Casp3","Casp4","Casp7","Casp9","Ccar1","Cflar","Chek2","Chia1","Cib1","Ctsc","Ctsl","Cul1","Cul7","Cxcr3","Cxcr4","Dapk1","Dedd2","Dfna5","Dnase2a","Dnm1l","Dnmt3a","Dpysl4","Dram1","Dynll2","E2f1","E2f2","Eif4g2","Elmo2","Emp3","Epha7","Erbb4…
GO:0031349	6	positive regulation of defense response	105	388	46.9271	5.72636e-16	3.13467e-14	["Adam8","Adora2b","Alox5ap","Cadm1","Ccl24","Ccl3","Ccl5","Cd28","Cdk19","Cnpy3","Ctsb","Ctsl","Cul1","Cxcl1","Cyba","Ddx60","Dusp3","Dusp7","Egfr","Fadd","Fcgr3","Gja1","Hck","Hyal2","Ifih1","Ikbke","Il12a","Il12b","Il17ra","Il18","Il1b","Il23a","Il6","Il6st","Irak2","Irak3","Irf3","Itpr3","Jak2","Lyn","Map2k1","Map3k1","Map3k14","Mapk8","Marco","Mef2c","Myd88","Nfatc1","Nfatc2","Nfkb1","Nfkb2"…
GO:0051171	5	regulation of nitrogen compound metabolic process	605	3751	453.669	5.88908e-16	3.19522e-14	["Abca1","Abca2","Abhd14b","Acd","Acp5","Acvr1b","Acvr2a","Adam8","Adcy3","Adcy7","Adcy9","Adm","Adora2a","Adora2b","Aebp1","Aes","Aff1","Ahctf1","Ahnak","Ahr","Akap6","Akna","Ankar","Anp32a","Anxa3","Ap2a1","Apobec1","Apoe","Arg2","Arhgap22","Arhgef10l","Arid1b","Arid5a","Arid5b","Arrb1","Ascc1","Ascc3","Ass1","Atf3","Atf6b","Atmin","Atp8b1","BC094916","Babam1","Bahcc1","Bak1","Bambi","Batf","Ba…
GO:2000112	7	regulation of cellular macromolecule biosynthetic process	571	3507	424.158	8.08641e-16	4.34893e-14	["Aarsd1","Abca2","Abhd14b","Acd","Acvr1b","Acvr2a","Adam8","Adora2a","Aebp1","Aes","Aff1","Ago3","Ago4","Ahctf1","Ahr","Akna","Ang","Ankar","Anp32a","Anxa3","Apobec1","Arhgap22","Arhgef10l","Arid1b","Arid5a","Arid5b","Arrb1","Ascc1","Ascc3","Atf3","Atf6b","Atmin","Atp8b1","BC094916","Bace2","Bahcc1","Bambi","Batf","Batf2","Baz1a","Bcas3","Bcl2l12","Bcl3","Bcl9l","Bdp1","Bend6","Blzf1","Bmi1","Bm…
GO:0008219	4	cell death	193	906	109.577	9.17444e-16	4.89117e-14	["Aatk","Adam15","Adora2a","Adra1a","Ahr","Appl1","Arg2","Arhgef6","Atm","Bag6","Bak1","Bcap29","Bcl2l12","Bmf","Brinp1","Cacna1a","Cadm1","Casp1","Casp2","Casp3","Casp4","Casp7","Casp9","Ccar1","Cflar","Chek2","Chia1","Cib1","Ctsc","Ctsl","Cul1","Cul7","Cxcr3","Cxcr4","Dapk1","Dedd2","Dfna5","Dnase2a","Dnm1l","Dnmt3a","Dpysl4","Dram1","Dynll2","E2f1","E2f2","Eif4g2","Elmo2","Emp3","Epha7","Erbb4…
GO:0002764	6	immune response-regulating signaling pathway	120	474	57.3285	1.10257e-15	5.82746e-14	["Adam8","Ago3","Ago4","Akt1s1","Arpc4","Baiap2","Brk1","Cacnb3","Casp9","Cd28","Cd38","Cd40","Cdkn1a","Cnpy3","Crk","Csk","Ctsb","Ctsl","Cul1","Cyfip1","Dusp3","Dusp7","Egfr","Elmo2","Erbb4","Fadd","Fcgr3","Fcgrt","Fgfr2","Foxo3","Foxo4","Fyb","Gab1","Hck","Ifih1","Ikbke","Il1b","Il20rb","Inpp5d","Irak2","Irak3","Irf3","Itpr3","Klhl6","Lat2","Lcp2","Limk1","Lyn","Map2k1","Map3k1","Map3k14","Mapk…
GO:0051345	6	positive regulation of hydrolase activity	174	794	96.0313	1.67074e-15	8.75494e-14	["Abl2","Acap3","Adap1","Adap2","Adcy3","Adcy7","Adcy9","Adra1a","Agap1","Agap3","Agfg1","Agfg2","Ahsa1","Akap6","Als2cl","Ang","Arap2","Arfgef3","Arhgap19","Arhgap22","Arhgap24","Arhgap25","Arhgap27","Arhgap31","Arhgap9","Arhgdia","Arhgef1","Arhgef10l","Arhgef3","Arhgef6","Arhgef7","Arrb1","Atp1b3","Bak1","Bcar3","Bcas3","Casp1","Casp2","Casp3","Casp4","Casp7","Casp9","Ccl24","Ccl5","Cd300a","Cd…
GO:0045087	4	innate immune response	169	764	92.4029	1.76413e-15	9.16601e-14	["Abl2","Adam15","Adcy3","Adcy7","Adcy9","Ago3","Ago4","Akt1s1","Arpc4","B2m","Baiap2","Brk1","C1qa","C1qb","C1qc","C1ra","Casp1","Casp9","Cd180","Cd28","Cd300e","Cd300lb","Cd55","Cdkn1a","Cfb","Cnpy3","Coro1a","Crk","Csk","Ctsb","Ctsl","Cul1","Cyba","Cybb","Cyfip1","Ddx60","Dusp3","Dusp7","Egfr","Eif2ak2","Elmo2","Erbb4","Fadd","Fau","Fes","Fgfr2","Foxo3","Foxo4","Gab1","H60b","Hck","Herc6","His…
GO:0031327	7	negative regulation of cellular biosynthetic process	272	1421	171.865	1.89436e-15	9.75992e-14	["Acd","Acp5","Aebp1","Aes","Ago3","Ago4","Ahr","Akap6","Akr1c18","Ang","Arid5a","Arid5b","Arrb1","Atf3","Atp8b1","BC094916","Bace2","Bahcc1","Bcl3","Bend6","Bmi1","Cacna1a","Cbx4","Cbx6","Cbx7","Cbx8","Cby1","Cc2d1a","Cc2d1b","Ccar1","Ccl3","Ccl5","Cd38","Cdan1","Cdk5rap3","Cebpa","Cela1","Chek2","Cipc","Cmklr1","Cops2","Crebrf","Ctnnbip1","Cyp1b1","Dapk1","Ddx5","Deaf1","Dedd2","Dnajb6","Dnajc2…
GO:0048856	3	anatomical structure development	556	3413	412.789	2.01184e-15	1.02788e-13	["Aatk","Abca12","Abcb5","Acd","Acsl4","Acvr1b","Acvr2a","Adam15","Adam17","Adamts18","Adamts4","Adap2","Adgrb2","Adgrg1","Adgrl2","Adgrl3","Adipor2","Adm","Adora2a","Adra1a","Aebp1","Aes","Agpat2","Ahctf1","Ahr","Aldh1a2","Aldh2","Aldh3a2","Alg10b","Amot","Anapc2","Ang","Angpt2","Anxa3","Apba2","Aplp2","Apoe","Arg1","Arg2","Arhgef7","Arid1b","Arid5b","Arsa","Arsb","Ass1","Atg7","Atm","Atp2b2","A…
GO:1901575	4	organic substance catabolic process	274	1437	173.8	2.42389e-15	1.22817e-13	["Abcd1","Abhd12","Abhd4","Acaa2","Acads","Acot2","Acot7","Acox3","Adamts12","Agap3","Ago3","Ago4","Akr1c18","Aldh1l1","Aldh2","Aldh4a1","Ambp","Amdhd2","Anapc10","Anapc11","Anapc2","Ap1s1","Apobec1","Apoe","Arg1","Arg2","Arrb1","Arsb","Atg7","Atm","Bace2","Bag6","Bckdha","Bckdk","Bhmt","Bscl2","Cacul1","Cant1","Capn1","Casp3","Cbr1","Cbr3","Cd44","Cdk2","Cemip","Chek2","Chia1","Cln5","Cln6","Cln…
GO:0032880	5	regulation of protein localization	198	948	114.657	3.11996e-15	1.56791e-13	["2700049A03Rik","Abca12","Abcc8","Abl2","Adam8","Adora2a","Akap6","Ang","Appl1","Arhgdia","Arl2","Arrb1","B3gat3","Bambi","Bcas3","Bcl3","Bmf","C5ar2","Cacna1a","Cadm1","Camk1","Casp1","Casp4","Ccdc22","Ccl3","Ccl5","Cd274","Cd38","Cd40","Cdk5rap3","Cdkn1a","Cemip","Cep131","Cftr","Chia1","Cib1","Cpt1a","Crebrf","Csf3","Csk","Ctdspl2","Cyb5r1","Dnajc1","Dnm1l","Dynll2","E2f1","Egfr","Erbb4","Erp…
GO:0001775	4	cell activation	151	663	80.1873	4.57914e-15	2.28249e-13	["Abcc4","Abl2","Adam17","Adora2a","Ahr","Anxa3","Arrb1","B2m","Batf","Batf2","Bcl3","Blnk","Bmper","Braf","Cadm1","Calu","Casp1","Cblb","Ccl3","Ccl5","Cd151","Cd180","Cd28","Cd40","Cd93","Cmtm7","Coro1a","Crk","Csf2","Csk","Cxcr4","Dagla","Daglb","Dgkd","Dgkh","Dgkz","Dock8","Edn1","Egfr","Egr1","Entpd1","F2r","Fadd","Fcgr2b","Fcgr3","Fcgr4","Fn1","Fyb","Fzd5","Gadd45g","Gna12","Gnb1","Gng2","Gp…
GO:0044711	4	single-organism biosynthetic process	252	1306	157.956	8.83544e-15	4.36856e-13	["Abcc5","Acaa2","Acot7","Acsl4","Acsl5","Acss1","Adcy3","Adcy7","Adcy9","Adi1","Adm","Adora2a","Adssl1","Agpat1","Agpat2","Agpat5","Akr1c18","Alas1","Aldh1a2","Aldh1l1","Aldh4a1","Alox5ap","Ang","Apoe","Aprt","Arg1","Arg2","Ass1","Atf3","Atm","Atp5d","Atp5g1","Atp6v0a1","B3gat3","B3gnt3","B3gnt8","B4galt1","B4galt4","B4galt6","B4gat1","Bhmt","C77370","Calcrl","Cdipt","Cds2","Cebpa","Cept1","Cers…
GO:0060341	5	regulation of cellular localization	250	1293	156.383	8.9585e-15	4.39396e-13	["Abca12","Abca2","Abcc8","Abl2","Acaa2","Acvr2a","Adam8","Adora2a","Adora2b","Akap6","Ang","Appl1","Arhgef7","Arl2","Arrb1","Atp1a2","B3gat3","B4galt1","Bak1","Bambi","Bcas3","Bcl3","Bmf","Braf","C5ar2","Cacna1a","Cadm1","Camk1","Casp1","Casp4","Ccdc22","Ccl3","Ccl5","Cd274","Cd300a","Cd38","Cd40","Cdk5rap3","Cdkn1a","Cemip","Cep131","Cftr","Chia1","Chmp6","Cib1","Coro1a","Cpt1a","Crebrf","Csf3"…
GO:0050778	6	positive regulation of immune response	134	568	68.6974	9.63434e-15	4.68795e-13	["Adam8","Adora2b","Arpc4","B2m","Baiap2","Brk1","C1qa","C1qb","C1qc","C1ra","Cacnb3","Cadm1","Ccl5","Cd28","Cd38","Cd40","Cd44","Cd55","Cfb","Cnpy3","Crk","Csk","Ctsb","Ctsl","Cul1","Cyfip1","Dusp3","Dusp7","Elmo2","Fadd","Fcgr3","Fyb","Fzd5","Hck","Ifih1","Ikbke","Il12a","Il12b","Il1b","Il23a","Il6","Il6st","Inpp5d","Irak2","Irak3","Irf3","Itpr3","Klhl6","Lat2","Lcp2","Limk1","Lyn","Map2k1","Ma…
GO:2000113	8	negative regulation of cellular macromolecule biosynthetic process	248	1283	155.174	1.19631e-14	5.77524e-13	["Acd","Aebp1","Aes","Ago3","Ago4","Ahr","Ang","Arid5a","Arid5b","Arrb1","Atf3","Atp8b1","BC094916","Bace2","Bahcc1","Bcl3","Bend6","Bmi1","Cbx4","Cbx6","Cbx7","Cbx8","Cby1","Cc2d1a","Cc2d1b","Cd38","Cdan1","Cdk5rap3","Cebpa","Cela1","Chek2","Cipc","Cmklr1","Cops2","Crebrf","Ctnnbip1","Cyp1b1","Dapk1","Ddx5","Deaf1","Dedd2","Dnajb6","Dnajc2","Dnmt1","Dnmt3a","Dnmt3l","Dot1l","Drap1","Dusp1","E2f1…
GO:0051049	5	regulation of transport	333	1865	225.565	2.53781e-14	1.21557e-12	["Abca1","Abca12","Abca2","Abcc8","Abl2","Acaa2","Acsl4","Acsl5","Acvr2a","Adam8","Adipor2","Adora2a","Adora2b","Ahnak","Akap6","Ang","Apoe","Appl1","Arg1","Arg2","Arhgef7","Arl2","Arrb1","Aspscr1","Atg7","Atp1a2","Atp1b3","Atp2b2","B3gat3","B4galt1","Bak1","Bambi","Bcas3","Bcl3","Bmf","Braf","C5ar2","Cacna1a","Cacnb2","Cacnb3","Cadm1","Camk1","Camk1d","Car2","Casp1","Casp4","Ccdc22","Ccl3","Ccl5…
GO:0019219	6	regulation of nucleobase-containing compound metabolic process	581	3642	440.486	2.55798e-14	1.21574e-12	["Abca1","Abca2","Abhd14b","Acd","Acvr1b","Acvr2a","Adam8","Adcy3","Adcy7","Adcy9","Adm","Adora2a","Adora2b","Aebp1","Aes","Aff1","Ahctf1","Ahnak","Ahr","Akap6","Akna","Ankar","Anp32a","Anxa3","Apobec1","Apoe","Arhgap22","Arhgef10l","Arid1b","Arid5a","Arid5b","Arrb1","Ascc1","Ascc3","Atf3","Atf6b","Atmin","Atp8b1","BC094916","Babam1","Bahcc1","Bak1","Bambi","Batf","Batf2","Baz1a","Bcas3","Bcl2l12…
GO:0051240	5	positive regulation of multicellular organismal process	280	1505	182.024	2.69338e-14	1.27024e-12	["Abl2","Acvr1b","Acvr2a","Adam17","Adam8","Adgrb2","Adgrl2","Adgrl3","Adm","Adora2a","Adora2b","Adra1a","Agpat1","Agpat2","Akap6","Amot","Anapc2","Angpt2","Angptl4","Anxa3","Apoe","Arhgdia","Arsb","Atg7","Atraid","B4galt1","Baiap2","Bambi","Bcas3","Bcl3","Bcl9l","Bend6","Bmi1","Bmp1","Braf","Brinp1","Brinp3","Cadm1","Camk1","Camk1d","Car2","Casp1","Casp4","Cblb","Cbx8","Ccl24","Ccl3","Ccl5","Cd2…
GO:0012501	5	programmed cell death	181	864	104.498	3.85627e-14	1.80479e-12	["Aatk","Adam15","Adora2a","Adra1a","Ahr","Appl1","Arg2","Arhgef6","Atm","Bag6","Bak1","Bcap29","Bcl2l12","Bmf","Cadm1","Casp1","Casp2","Casp3","Casp4","Casp7","Casp9","Ccar1","Cflar","Chek2","Chia1","Cib1","Ctsc","Ctsl","Cul1","Cul7","Cxcr3","Cxcr4","Dapk1","Dedd2","Dfna5","Dnase2a","Dnm1l","Dnmt3a","Dram1","Dynll2","E2f1","E2f2","Elmo2","Epha7","Erbb4","Fadd","Fastk","Fgfr2","Foxo3","Fzd5","Gad…
GO:0006915	6	apoptotic process	176	834	100.869	4.43364e-14	2.05929e-12	["Aatk","Adam15","Adora2a","Adra1a","Ahr","Appl1","Arg2","Arhgef6","Atm","Bag6","Bak1","Bcap29","Bcl2l12","Bmf","Cadm1","Casp1","Casp2","Casp3","Casp4","Casp7","Casp9","Ccar1","Cflar","Chek2","Chia1","Cib1","Ctsc","Ctsl","Cul1","Cul7","Cxcr3","Cxcr4","Dapk1","Dedd2","Dfna5","Dnase2a","Dnm1l","Dnmt3a","Dram1","Dynll2","E2f1","E2f2","Elmo2","Epha7","Erbb4","Fadd","Fastk","Fgfr2","Foxo3","Fzd5","Gad…
GO:0002253	3	activation of immune response	108	429	51.8859	4.49457e-14	2.0719e-12	["Adam8","Arpc4","Baiap2","Brk1","C1qa","C1qb","C1qc","C1ra","Cacnb3","Cd28","Cd38","Cd55","Cfb","Cnpy3","Crk","Csk","Ctsb","Ctsl","Cul1","Cyfip1","Dusp3","Dusp7","Elmo2","Fadd","Fyb","Hck","Ifih1","Ikbke","Il1b","Inpp5d","Irak2","Irak3","Irf3","Itpr3","Klhl6","Lat2","Lcp2","Limk1","Lyn","Map2k1","Map3k1","Map3k14","Mapk8","Marco","Mef2c","Myd88","Myo10","Nck1","Nckipsd","Nfam1","Nfatc1","Nfatc2"…
GO:0002757	4	immune response-activating signal transduction	99	380	45.9596	5.32352e-14	2.43571e-12	["Adam8","Arpc4","Baiap2","Brk1","Cacnb3","Cd28","Cd38","Cnpy3","Crk","Csk","Ctsb","Ctsl","Cul1","Cyfip1","Dusp3","Dusp7","Elmo2","Fadd","Fyb","Hck","Ifih1","Ikbke","Il1b","Inpp5d","Irak2","Irak3","Irf3","Itpr3","Klhl6","Lat2","Lcp2","Limk1","Lyn","Map2k1","Map3k1","Map3k14","Mapk8","Marco","Mef2c","Myd88","Myo10","Nck1","Nckipsd","Nfam1","Nfatc1","Nfatc2","Nfkb1","Nfkb2","Nod1","Nod2","Peli1","P…
GO:0048513	4	organ development	295	1617	195.57	6.38018e-14	2.8841e-12	["Aatk","Acvr2a","Adam17","Adamts18","Adap2","Adgrg1","Adgrl2","Adgrl3","Adipor2","Adm","Adra1a","Aebp1","Ahctf1","Ahr","Aldh1a2","Aldh2","Ang","Angpt2","Anxa3","Arg1","Arg2","Arid5b","Ass1","Atg7","Atm","Atp2b2","B4galt1","Bag6","Bak1","Bcl3","Bmi1","Bmp1","C1qb","C2cd3","Cadm1","Calcrl","Car2","Casp1","Casp2","Casp3","Casp7","Cbx7","Cd164","Cd44","Cdk2","Cdk5rap3","Cdkn1a","Cebpa","Cela1","Cftr…
GO:0016310	6	phosphorylation	214	1079	130.501	6.39761e-14	2.8841e-12	["Aatk","Abi3","Abl2","Acvr1b","Acvr2a","Adck1","Adora2b","Akap6","Alpk1","Alpk2","Arhgef6","Atm","Atp5d","Bckdk","Bmp2k","Braf","Camk1","Camk1d","Ccl3","Ccl5","Cdk15","Cdk18","Cdk19","Cdk2","Cdk20","Cdk8","Cdkn1a","Cerk","Chchd10","Chek2","Ckb","Coasy","Csk","Csnk1a1","Csnk1e","Csnk1g2","Csnk1g3","D8Ertd82e","Dapk1","Dcakd","Dclk1","Ddr1","Dgkd","Dgkh","Dgkz","Dguok","Dok1","Dusp3","Dusp7","Dyrk…
GO:0032101	5	regulation of response to external stimulus	170	800	96.7569	6.48493e-14	2.90212e-12	["1810022K09Rik","Acp5","Adam17","Adam8","Adamts12","Adamts18","Adora2a","Adora2b","Alox5ap","Alpk1","Angpt2","Aoah","Ap1b1","Ap1s1","Ap1s3","Ap2a1","Apoe","Atg7","B2m","Braf","C5ar2","Calcrl","Camk1d","Casp1","Casp4","Ccl24","Ccl3","Ccl5","Cd180","Cd28","Cd37","Cd37 (ENSMUSG00000109208)","Cd55","Cd93","Cdk19","Cfb","Chaf1b","Chst3","Cmklr1","Cnr2","Ctla2a","Cxcl1","Cxcl9","Cxcr3","Cxcr4","Cyba",…
GO:0051248	7	negative regulation of protein metabolic process	205	1024	123.849	8.63697e-14	3.83719e-12	["Adora2a","Ago3","Ago4","Akt1s1","Ambp","Anapc10","Anapc11","Anapc2","Ang","Aplp2","Apoe","Arrb1","Atg7","Atm","Atraid","Bace2","Bag6","Bak1","Bcl2l12","Bcl3","Casp3","Cd300a","Cd44","Cd55","Cdk5rap3","Cdkn1a","Cebpa","Cflar","Chordc1","Cib1","Cish","Cln8","Col28a1","Csk","Ctdsp1","Ctdsp2","Ctla2a","Dag1","Dapk1","Deptor","Dnajb6","Dnajc1","Dnmt1","Dusp1","Dusp16","Dusp2","Dusp3","Dusp7","Ecm1",…
GO:0030154	5	cell differentiation	378	2197	265.719	9.45338e-14	4.16969e-12	["Abca12","Abca15","Abcb5","Abl2","Acp5","Acsl4","Adam17","Adgrg1","Adm","Agfg1","Agpat5","Ahr","Aldh1a2","Amot","Anapc2","Ang","Angpt2","Angptl4","Apoe","Arhgap22","Arhgap24","Arhgef7","Arid5a","Arid5b","Arl11","Atf3","Atp2b2","Atraid","B2m","Bag6","Batf","Batf2","Bcap29","Bcl3","Bcl9l","Blnk","Bmp1","Bmper","Boc","Braf","Bscl2","Cacna1a","Cadm1","Camk1","Capn5","Car2","Casp3","Casp9","Cbr1","Cb…
GO:0044248	4	cellular catabolic process	256	1361	164.608	1.1015e-13	4.8238e-12	["Abcd1","Abhd12","Acaa2","Acads","Acot2","Acot7","Acox3","Adamts12","Agap3","Ago3","Ago4","Akr1c18","Aldh1l1","Aldh4a1","Ambp","Amdhd2","Anapc10","Anapc11","Anapc2","Ap1s1","Apobec1","Apoe","Arg1","Arg2","Arrb1","Arsa","Arsb","Atg101","Atg2a","Atg7","Atg9b","Atm","Bag6","Bckdha","Bckdk","Bhmt","Cacul1","Cant1","Capn1","Casp3","Cbr1","Cbr3","Cdk2","Chek2","Cln6","Cln8","Cnot7","Cnp","Cpt1a","Crat…
GO:0070201	6	regulation of establishment of protein localization	174	830	100.385	1.1524e-13	4.9839e-12	["2700049A03Rik","Abcc8","Abl2","Adam8","Adora2a","Akap6","Ang","Appl1","Arl2","Arrb1","B3gat3","Bambi","Bcas3","Bcl3","Bmf","C5ar2","Cacna1a","Cadm1","Camk1","Casp1","Casp4","Ccdc22","Ccl3","Ccl5","Cd274","Cd38","Cd40","Cdkn1a","Cemip","Cep131","Cftr","Chia1","Cib1","Cpt1a","Crebrf","Csf3","Csk","Ctdspl2","Cyb5r1","Dnajc1","Dnm1l","Dynll2","E2f1","Egfr","Erbb4","Erp29","Ezr","F2r","Fam89b","Fn1"…
GO:0048869	4	cellular developmental process	486	2973	359.573	1.15432e-13	4.9839e-12	["2700049A03Rik","Abca12","Abca15","Abcb5","Abl2","Acp5","Acsl4","Adam15","Adam17","Adam8","Adgrg1","Adm","Adora2a","Agfg1","Agpat5","Ahr","Aldh1a2","Alg10b","Amot","Anapc2","Ang","Angpt2","Angptl4","Antxr1","Apoe","Arhgap22","Arhgap24","Arhgef7","Arid5a","Arid5b","Arl11","Atf3","Atg7","Atm","Atmin","Atp2b2","Atp8b1","Atraid","B2m","B4galt1","Bag6","Baiap2","Bak1","Batf","Batf2","Bcap29","Bcl3","…
GO:2001141	7	regulation of RNA biosynthetic process	519	3215	388.842	1.24937e-13	5.35658e-12	["Abca2","Abhd14b","Acvr1b","Acvr2a","Adam8","Adora2a","Aebp1","Aes","Aff1","Ahctf1","Ahr","Akna","Ankar","Anp32a","Anxa3","Apobec1","Arhgap22","Arhgef10l","Arid1b","Arid5a","Arid5b","Arrb1","Ascc1","Ascc3","Atf3","Atf6b","Atmin","Atp8b1","BC094916","Bahcc1","Bambi","Batf","Batf2","Baz1a","Bcas3","Bcl2l12","Bcl3","Bcl9l","Bdp1","Bend6","Blzf1","Bmi1","Bmyc","C130026I21Rik","Calcoco1","Camk1","Cam…
GO:0042325	8	regulation of phosphorylation	255	1356	164.003	1.27061e-13	5.4098e-12	["Abl2","Acvr1b","Acvr2a","Adam17","Adam8","Adcy3","Adcy7","Adcy9","Adora2a","Adora2b","Adra1a","Akap6","Akt1s1","Ambp","Ang","Aplp2","Apoe","Arrb1","Bak1","Bcar3","Bmper","Braf","C5ar2","Cacul1","Camk1","Casp3","Ccl3","Ccl5","Ccnb3","Ccnyl1","Cd300a","Cd40","Cd44","Cdk5rap3","Cdkn1a","Cebpa","Cemip","Chordc1","Cib1","Cish","Crk","Csf2","Csf3","Csk","Ctdsp1","Ctdsp2","Cxcr4","Dag1","Deptor","Dusp…
GO:0010557	7	positive regulation of macromolecule biosynthetic process	302	1674	202.464	1.31321e-13	5.55262e-12	["Abhd14b","Acd","Acvr1b","Adam8","Aff1","Ahctf1","Ahr","Akna","Ankar","Anxa3","Apobec1","Arhgef10l","Arid1b","Arid5a","Arid5b","Arrb1","Atf3","Atf6b","Atmin","Bambi","Batf","Bcas3","Bcl2l12","Bcl3","Bcl9l","Calcoco1","Camk1","Camk1d","Cbx8","Ccl3","Ccl5","Ccpg1","Cd28","Cd38","Cd40","Cdk2","Cdk5rap3","Cdk8","Cebpa","Cela1","Cflar","Chek2","Cib1","Cnot7","Coa3","Creb3l2","Csf2","Csf3","Ctc1","Cxc…
GO:0044712	4	single-organism catabolic process	169	801	96.8779	1.47927e-13	6.21194e-12	["Abcd1","Abhd12","Abhd4","Acaa2","Acads","Acot2","Acot7","Acox3","Adam15","Adam17","Akr1c18","Aldh1l1","Aldh2","Aldh4a1","Ambp","Amdhd2","Apobec1","Apoe","Arg1","Arg2","Arsb","Atg2a","Atg7","Atg9b","Bckdha","Bckdk","Bscl2","Cant1","Cbr1","Cbr3","Cd44","Cemip","Cnp","Col11a1","Col11a2","Col12a1","Col16a1","Col19a1","Col4a1","Col4a2","Col4a5","Col5a3","Cpt1a","Crat","Crot","Ctsb","Ctsd","Ctsl","Cy…
GO:0042221	3	response to chemical	482	2949	356.67	1.54465e-13	6.44234e-12	["Aanat","Abca1","Abca2","Abcc1","Abcc3","Abcc4","Abcc5","Abcc6","Abcc8","Abl2","Abtb2","Acaa2","Acads","Acot2","Acp5","Acsl4","Acsl5","Acvr2a","Adam17","Adam8","Adamts12","Adamts7","Adcy3","Adcy7","Adcy9","Add3","Adipor2","Adm","Adora2a","Adprhl2","Adra1a","Adssl1","Aes","Agap3","Ahr","Akap6","Akr1c18","Alas1","Aldh1a2","Aldh2","Aldh3a2","Alox5ap","Ang","Angpt2","Anxa3","Ap1s1","Apobec1","Apoe",…
GO:0001932	8	regulation of protein phosphorylation	243	1279	154.69	1.61979e-13	6.71008e-12	["Abl2","Acvr1b","Acvr2a","Adam17","Adam8","Adcy3","Adcy7","Adcy9","Adora2a","Adora2b","Adra1a","Akap6","Akt1s1","Ambp","Ang","Aplp2","Apoe","Arrb1","Bak1","Bcar3","Bmper","Braf","C5ar2","Cacul1","Camk1","Casp3","Ccl3","Ccl5","Ccnb3","Ccnyl1","Cd300a","Cd40","Cd44","Cdk5rap3","Cdkn1a","Cebpa","Cemip","Chordc1","Cib1","Cish","Crk","Csf2","Csf3","Csk","Ctdsp1","Ctdsp2","Cxcr4","Dag1","Deptor","Dusp…
GO:1903506	8	regulation of nucleic acid-templated transcription	515	3195	386.423	2.09039e-13	8.60145e-12	["Abca2","Abhd14b","Acvr1b","Acvr2a","Adam8","Adora2a","Aebp1","Aes","Aff1","Ahctf1","Ahr","Akna","Ankar","Anp32a","Anxa3","Apobec1","Arhgap22","Arhgef10l","Arid1b","Arid5a","Arid5b","Arrb1","Ascc1","Ascc3","Atf3","Atf6b","Atmin","Atp8b1","BC094916","Bahcc1","Bambi","Batf","Batf2","Baz1a","Bcas3","Bcl2l12","Bcl3","Bcl9l","Bdp1","Bend6","Blzf1","Bmi1","Bmyc","C130026I21Rik","Calcoco1","Camk1","Cam…
GO:0043207	4	response to external biotic stimulus	175	842	101.837	2.16961e-13	8.86792e-12	["Abca1","Abcc3","Abcc5","Abcc8","Acp5","Adam17","Adamts4","Adm","Aldh2","Anxa3","Ap1s1","Apobec1","Arg1","Arg2","Ass1","Atg7","B2m","Baiap2","Bak1","Batf","Batf2","Bcl3","Casp1","Casp3","Casp9","Cbr1","Ccl5","Cd180","Cd300lb","Cd37","Cd37 (ENSMUSG00000109208)","Cd40","Cdk19","Cfb","Cnp","Cnr2","Cotl1","Csf2","Csf2rb","Csf3","Cxcl1","Cxcl9","Cxcr4","Dclk1","Ddx1","Ddx21","Ddx60","Dnmt1","Duox2","…
GO:0031401	8	positive regulation of protein modification process	213	1088	131.589	2.83798e-13	1.15229e-11	["Abl2","Acvr1b","Acvr2a","Adam17","Adam8","Adcy3","Adcy7","Adcy9","Adora2b","Adra1a","Akap6","Anapc10","Anapc11","Anapc2","Ang","Arid5a","Arrb1","Arrdc4","Atg7","Bak1","Bcar3","Bmi1","Bmper","Braf","C5ar2","Cacul1","Camk1","Ccdc22","Ccl3","Ccl5","Cd300lh","Cd40","Cd44","Cdk5rap3","Cdkn1a","Cemip","Cib1","Crk","Csf2","Csf3","Csk","Cul1","Cxcr4","Dnmt1","Dvl2","Edn1","Egfr","Eif2ak2","Epha4","Erbb…
GO:0051172	6	negative regulation of nitrogen compound metabolic process	255	1366	165.212	2.96033e-13	1.19406e-11	["Acd","Acp5","Aebp1","Aes","Ahr","Akap6","Ap2a1","Apoe","Arid5a","Arid5b","Arrb1","Atf3","Atp8b1","BC094916","Bahcc1","Bcl3","Bend6","Bmi1","Cbx4","Cbx6","Cbx7","Cbx8","Cby1","Cc2d1a","Cc2d1b","Ccar1","Ccl3","Ccl5","Cd38","Cdan1","Cdk5rap3","Cebpa","Cela1","Chek2","Cipc","Cmklr1","Cops2","Crebrf","Ctnnbip1","Cyp1b1","Ddx5","Deaf1","Dedd2","Dhx34","Dnajb6","Dnajc2","Dnmt1","Dnmt3a","Dnmt3l","Dot1…
GO:0045934	7	negative regulation of nucleobase-containing compound metabolic process	251	1341	162.189	3.43327e-13	1.37578e-11	["Acd","Aebp1","Aes","Ahr","Akap6","Arid5a","Arid5b","Arrb1","Atf3","Atp8b1","BC094916","Bahcc1","Bcl3","Bend6","Bmi1","Cbx4","Cbx6","Cbx7","Cbx8","Cby1","Cc2d1a","Cc2d1b","Ccar1","Ccl3","Ccl5","Cd38","Cdan1","Cdk5rap3","Cebpa","Cela1","Chek2","Cipc","Cmklr1","Cops2","Crebrf","Ctnnbip1","Cyp1b1","Ddx5","Deaf1","Dedd2","Dhx34","Dnajb6","Dnajc2","Dnmt1","Dnmt3a","Dnmt3l","Dot1l","Drap1","Dusp1","E2…
GO:0043549	6	regulation of kinase activity	162	766	92.6448	3.92003e-13	1.56063e-11	["Adam17","Adam8","Adcy3","Adcy7","Adcy9","Adora2a","Adora2b","Akap6","Akt1s1","Ang","Aplp2","Apoe","Arrb1","Bak1","Braf","Cacul1","Camk1","Casp3","Ccl5","Ccnb3","Ccnyl1","Cd300a","Cd40","Cd44","Cdk5rap3","Cdkn1a","Cebpa","Cemip","Chordc1","Cib1","Cish","Crk","Csk","Cxcr4","Deptor","Dusp1","Dusp16","Dusp2","Dusp3","Dusp7","Dvl2","Edn1","Egfr","Eif2ak2","Epha4","Erbb4","Erp29","F2r","Fgd4","Flt1",…
GO:0006355	7	regulation of transcription, DNA-templated	510	3173	383.762	4.66845e-13	1.83586e-11	["Abca2","Abhd14b","Acvr1b","Acvr2a","Adam8","Adora2a","Aebp1","Aes","Aff1","Ahctf1","Ahr","Akna","Ankar","Anp32a","Anxa3","Apobec1","Arhgap22","Arhgef10l","Arid1b","Arid5a","Arid5b","Arrb1","Ascc1","Ascc3","Atf3","Atf6b","Atmin","Atp8b1","BC094916","Bahcc1","Bambi","Batf","Batf2","Baz1a","Bcas3","Bcl2l12","Bcl3","Bcl9l","Bdp1","Bend6","Blzf1","Bmi1","Bmyc","C130026I21Rik","Calcoco1","Camk1","Cam…
GO:0045089	7	positive regulation of innate immune response	80	289	34.9534	4.67124e-13	1.83586e-11	["Adam8","Cadm1","Ccl5","Cnpy3","Ctsb","Ctsl","Cul1","Dusp3","Dusp7","Fadd","Hck","Ifih1","Ikbke","Il12a","Il12b","Il1b","Irak2","Irak3","Irf3","Itpr3","Lyn","Map2k1","Map3k1","Map3k14","Mapk8","Marco","Mef2c","Myd88","Nfatc1","Nfatc2","Nfkb1","Nfkb2","Nlrc4","Nod1","Nod2","Peli1","Peli2","Pik3r4","Polr3d","Ppp3ca","Prkacb","Prkcd","Psma2","Psma3","Psma4","Psma5","Psma6","Psmb4","Psmb7","Psmc1","…
GO:0045859	7	regulation of protein kinase activity	153	712	86.1137	4.78847e-13	1.86994e-11	["Adam17","Adam8","Adcy3","Adcy7","Adcy9","Adora2a","Adora2b","Akap6","Akt1s1","Ang","Aplp2","Apoe","Arrb1","Bak1","Braf","Cacul1","Camk1","Casp3","Ccl5","Ccnb3","Ccnyl1","Cd300a","Cd40","Cdk5rap3","Cdkn1a","Cebpa","Cemip","Chordc1","Cib1","Cish","Crk","Csk","Cxcr4","Deptor","Dusp1","Dusp16","Dusp2","Dusp3","Dusp7","Dvl2","Edn1","Egfr","Eif2ak2","Epha4","Erp29","F2r","Fgd4","Flt1","Fpr1","Fzd5","…
GO:0045088	6	regulation of innate immune response	93	360	43.5406	5.27834e-13	2.0482e-11	["Adam8","Cadm1","Ccl5","Clec2d","Cnpy3","Ctsb","Ctsl","Cul1","Dusp3","Dusp7","Erap1","Fadd","Hck","Ifih1","Ifnar2","Ikbke","Il12a","Il12b","Il1b","Irak2","Irak3","Irf3","Itpr3","Jak2","Lyn","Map2k1","Map3k1","Map3k14","Mapk8","Marco","Mef2c","Myd88","Myo1f","Nfatc1","Nfatc2","Nfkb1","Nfkb2","Nlrc4","Nlrx1","Nmi","Nod1","Nod2","Nr1h2","Peli1","Peli2","Pik3r4","Pik3r6","Polr3d","Pparg","Ppp3ca","P…
GO:0031400	8	negative regulation of protein modification process	125	544	65.7947	5.6736e-13	2.18773e-11	["Adora2a","Akt1s1","Ambp","Anapc10","Anapc11","Anapc2","Apoe","Arrb1","Atg7","Atm","Bak1","Casp3","Cd300a","Cdk5rap3","Cdkn1a","Cebpa","Chordc1","Cib1","Cish","Csk","Ctdsp1","Ctdsp2","Dag1","Deptor","Dnmt1","Dusp1","Dusp16","Dusp2","Dusp3","Dusp7","Enpp1","Fam129a","Flcn","Gadd45b","Gadd45g","Gbp4","Gpd1l","Gtpbp4","Hfe","Hhex","Hmg20b","Hnf4a","Hyal2","Il18","Il1b","Il6","Inppl1","Irak3","Isg15…
GO:2000026	5	regulation of multicellular organismal development	309	1742	210.688	5.80813e-13	2.2256e-11	["2900011O08Rik","Aatk","Abl2","Acvr1b","Acvr2a","Adam8","Adamts12","Adamts7","Adgrb2","Adgrg1","Adgrl2","Adgrl3","Adm","Adora2b","Ahr","Akap6","Amot","Anapc2","Angpt2","Angptl4","Ank","Anxa3","Apoe","Arhgdia","Arhgef1","Arsb","Atg7","Atraid","B4galt1","Baiap2","Bambi","Bcl9l","Bend6","Bmi1","Bmp1","Bmp2k","Boc","Braf","Brinp1","Brinp3","C1qc","Cacna1a","Camk1","Camk1d","Car2","Cblb","Ccl24","Ccl…
GO:0051347	6	positive regulation of transferase activity	133	592	71.6001	5.90465e-13	2.24853e-11	["Acd","Adam17","Adam8","Adcy3","Adcy7","Adcy9","Adora2b","Akap6","Anapc10","Anapc11","Anapc2","Ang","Arrb1","Arrdc4","Bak1","Bmi1","Braf","Cacul1","Camk1","Ccl5","Cd40","Cd44","Cdkn1a","Cemip","Cib1","Crk","Csk","Cul1","Cxcr4","Dvl2","Edn1","Egfr","Eif2ak2","Epha4","Erbb4","Erp29","F2r","Fgd4","Flt1","Fpr1","Fzd5","Gab1","Gadd45b","Gadd45g","Il1b","Irak2","Itgb3","Jak2","Kitl","Lcp2","Lpar1","Ly…
GO:0010033	4	response to organic substance	410	2455	296.923	6.83583e-13	2.58707e-11	["Aanat","Abca1","Abca2","Abcc3","Abcc4","Abcc5","Abcc8","Abl2","Acads","Acot2","Acp5","Acsl4","Acsl5","Acvr2a","Adam17","Adamts12","Adamts7","Adcy3","Adcy7","Adcy9","Adm","Adora2a","Adra1a","Aes","Ahr","Akap6","Akr1c18","Alas1","Aldh1a2","Aldh2","Ang","Angpt2","Anxa3","Ap1s1","Apobec1","Apoe","Aprt","Aqp9","Arg1","Arg2","Arhgdia","Arsa","Arsb","Ass1","Atf6b","Atp1a2","Atp1a3","Atp5g1","B2m","Bak…
GO:0006629	4	lipid metabolic process	221	1150	139.088	6.90528e-13	2.59732e-11	["Abca1","Abca2","Abcc1","Abcc3","Abcd1","Abhd12","Abhd4","Acaa2","Acads","Acot1","Acot2","Acot7","Acox3","Acsf2","Acsl4","Acsl5","Acss1","Adipor2","Adm","Agpat1","Agpat2","Agpat5","Akr1c18","Alas1","Aldh1a2","Aldh3a2","Alox5ap","Ang","Angptl4","Aoah","Aplp2","Apobec1","Apoe","Arsa","Arsb","Atm","Atp8b1","B4galt4","B4galt6","Bscl2","Cbr1","Cdipt","Cds2","Cebpa","Cept1","Cerk","Cers6","Cftr","Ch25…
GO:0032269	7	negative regulation of cellular protein metabolic process	192	963	116.471	8.20543e-13	3.05374e-11	["Adora2a","Ago3","Ago4","Akt1s1","Ambp","Anapc10","Anapc11","Anapc2","Ang","Aplp2","Apoe","Arrb1","Atg7","Atm","Atraid","Bag6","Bak1","Bcl2l12","Casp3","Cd300a","Cd44","Cd55","Cdk5rap3","Cdkn1a","Cebpa","Cflar","Chordc1","Cib1","Cish","Cln8","Col28a1","Csk","Ctdsp1","Ctdsp2","Ctla2a","Dag1","Dapk1","Deptor","Dnajb6","Dnajc1","Dnmt1","Dusp1","Dusp16","Dusp2","Dusp3","Dusp7","Ecm1","Edn1","Eif2ak2…
GO:0034641	4	cellular nitrogen compound metabolic process	678	4437	536.638	8.21836e-13	3.05374e-11	["Aanat","Aarsd1","Acd","Acot7","Acp5","Adcy3","Adcy7","Adcy9","Adi1","Adm","Adora2a","Adssl1","Aebp1","Aes","Aff1","Ago3","Ago4","Ahctf1","Ahcyl2","Ahr","Akna","Alas1","Aldh1l1","Aldh4a1","Ambp","Ang","Anp32a","Ap1s1","Ap5s1","Ap5z1","Apeh","Apoa1bp","Apobec1","Aprt","Arg1","Arg2","Arhgap22","Arid1b","Arid5a","Arid5b","Arrb1","Ascc1","Ascc3","Ass1","Atf3","Atf6b","Atg7","Atm","Atmin","Atp2b2","A…
GO:0002218	4	activation of innate immune response	71	245	29.6318	8.70028e-13	3.2105e-11	["Adam8","Cnpy3","Ctsb","Ctsl","Cul1","Dusp3","Dusp7","Fadd","Hck","Ifih1","Ikbke","Il1b","Irak2","Irak3","Irf3","Itpr3","Lyn","Map2k1","Map3k1","Map3k14","Mapk8","Marco","Mef2c","Myd88","Nfatc1","Nfatc2","Nfkb1","Nfkb2","Nlrc4","Nod1","Nod2","Peli1","Peli2","Pik3r4","Ppp3ca","Prkacb","Prkcd","Psma2","Psma3","Psma4","Psma5","Psma6","Psmb4","Psmb7","Psmc1","Psmc2","Psmc4","Psmc6","Psmd1","Psmd10",…
GO:0051252	6	regulation of RNA metabolic process	528	3317	401.179	8.74497e-13	3.2105e-11	["Abca2","Abhd14b","Acvr1b","Acvr2a","Adam8","Adora2a","Aebp1","Aes","Aff1","Ahctf1","Ahnak","Ahr","Akna","Ankar","Anp32a","Anxa3","Apobec1","Arhgap22","Arhgef10l","Arid1b","Arid5a","Arid5b","Arrb1","Ascc1","Ascc3","Atf3","Atf6b","Atmin","Atp8b1","BC094916","Bahcc1","Bambi","Batf","Batf2","Baz1a","Bcas3","Bcl2l12","Bcl3","Bcl9l","Bdp1","Bend6","Blzf1","Bmi1","Bmyc","C130026I21Rik","Calcoco1","Cam…
GO:0009891	6	positive regulation of biosynthetic process	325	1859	224.839	8.99106e-13	3.2812e-11	["Abca1","Abhd14b","Acd","Acsl5","Acvr1b","Adam8","Adcy3","Adcy7","Adcy9","Adm","Adora2a","Adora2b","Aff1","Ahctf1","Ahr","Akna","Ankar","Anxa3","Apobec1","Apoe","Arhgef10l","Arid1b","Arid5a","Arid5b","Arrb1","Ass1","Atf3","Atf6b","Atmin","Bambi","Batf","Bcas3","Bcl2l12","Bcl3","Bcl9l","Calcoco1","Calcrl","Camk1","Camk1d","Cbx8","Ccl3","Ccl5","Ccpg1","Cd28","Cd38","Cd40","Cdk2","Cdk5rap3","Cdk8",…
GO:0051272	6	positive regulation of cellular component movement	99	398	48.1366	1.12084e-12	4.06619e-11	["Abcc1","Acp5","Acvr1b","Adam17","Adam8","Amot","Anxa3","Arhgef7","Bcas3","Camk1d","Ccar1","Ccl24","Ccl3","Ccl5","Cd274","Cemip","Chst3","Cib1","Cmklr1","Coro1a","Cxcl1","Cxcl9","Cyp1b1","Edn1","Egfr","Erbb4","F10","F2r","F3","Fadd","Flt1","Fn1","Gcnt2","Glipr2","Grb7","Hyal1","Icam1","Il18","Il1a","Il1b","Il23a","Il6","Il6st","Itga4","Itgb3","Jak2","Kdr","Kitl","Lamb1","Lgr6","Lpar1","Lyn","Map…
GO:0043408	7	regulation of MAPK cascade	144	664	80.3083	1.14356e-12	4.12421e-11	["Abl2","Adam8","Adora2b","Adra1a","Ambp","Apoe","Arrb1","Bmper","Braf","C5ar2","Ccl3","Cd300a","Cd40","Cd44","Cib1","Crk","Csk","Cxcr4","Dag1","Dusp1","Dusp16","Dusp2","Dusp3","Dusp7","Dvl2","Edn1","Egfr","Eif2ak2","Epha4","Epha7","Erbb4","Erp29","F2r","Fgd4","Fgfr2","Flcn","Flt1","Fn1","Fpr1","Fzd5","Gab1","Gadd45b","Gadd45g","Gcnt2","Glipr2","Gpr183","Hyal2","Icam1","Igfbp4","Il1a","Il1b","Il6…
GO:0040011	2	locomotion	193	973	117.681	1.16291e-12	4.16949e-11	["Abcc1","Abl2","Adam17","Adam8","Adamts12","Adgrg1","Amot","Ang","Angpt2","Arhgap24","Arhgef7","Arid5b","Arsb","Astn1","Atp1a2","Atp1b3","Atp2b2","B4galt1","Bambi","Brk1","C5ar2","Ccl17","Ccl24","Ccl3","Ccl5","Ccr9","Ccrl2","Cd151","Cd44","Cd55","Cd84","Cln6","Cmklr1","Cmtm3","Cmtm7","Coro1a","Csf3r","Csk","Cxcl1","Cxcl9","Cxcr3","Cxcr4","Cyp1b1","Cysltr1","Dag1","Dclk1","Ddr1","Dgkz","Dnah5","D…
GO:0009607	3	response to biotic stimulus	177	872	105.465	1.36869e-12	4.87874e-11	["Abca1","Abcc3","Abcc5","Abcc8","Acp5","Adam17","Adamts4","Adm","Aldh2","Anxa3","Ap1s1","Apobec1","Arg1","Arg2","Ass1","Atg7","B2m","Baiap2","Bak1","Batf","Batf2","Bcl3","Casp1","Casp3","Casp9","Cbr1","Ccl5","Cd180","Cd300lb","Cd37","Cd37 (ENSMUSG00000109208)","Cd40","Cdk19","Cfb","Cnp","Cnr2","Cotl1","Csf2","Csf2rb","Csf3","Cxcl1","Cxcl9","Cxcr4","Dclk1","Ddx1","Ddx21","Ddx60","Dnmt1","Duox2","…
GO:0019637	4	organophosphate metabolic process	165	798	96.5151	1.69457e-12	6.00543e-11	["Abhd12","Acot7","Acsl5","Adcy3","Adcy7","Adcy9","Adm","Adora2a","Adssl1","Agpat1","Agpat2","Agpat5","Apoa1bp","Aprt","Atm","Atp2b2","Atp5d","Atp5g1","Atp6v0a1","Atp6v1a","Calcrl","Cant1","Cdipt","Cds2","Cept1","Chchd10","Ckb","Cln8","Cmas","Cnp","Coasy","Cpne6","Crot","Dcakd","Dctpp1","Dguok","Dhodh","Dolpp1","Dpm2","Dpm3","Eno1","Eno1b","Enpp1","Entpd1","Fads1","Fig4","Fmo2","Fut8","G6pc2","Ga…
GO:0022603	5	regulation of anatomical structure morphogenesis	189	953	115.262	2.05188e-12	7.22993e-11	["Aatk","Adamts12","Adgrb2","Adm","Adora2b","Amot","Anapc2","Angpt2","Angptl4","Anxa3","Apoe","Arhgdia","Arhgef1","Arhgef7","Atp10a","B4galt1","Baiap2","Bambi","Bcl9l","Braf","Cacna1a","Camk1","Ccl24","Ccl3","Ccl5","Cdc42ep2","Cdc42ep3","Cflar","Cib1","Col4a2","Coro1a","Cpne6","Csnk1a1","Csnk1e","Csnk1g2","Csnk1g3","Cul7","Cxcl9","Cxcr3","Cyfip1","Cyp1b1","Cysltr1","Dag1","Ddhd1","Dhodh","Dnm1l",…
GO:0010468	6	regulation of gene expression	612	3959	478.826	2.06447e-12	7.23271e-11	["Aarsd1","Abca2","Abhd14b","Acvr1b","Acvr2a","Adam8","Adora2a","Aebp1","Aes","Aff1","Ago3","Ago4","Ahctf1","Ahnak","Ahr","Akna","Aldh1a2","Ang","Ankar","Anp32a","Anxa3","Apba2","Apobec1","Apoe","Arhgap22","Arhgef10l","Arid1b","Arid5a","Arid5b","Arrb1","Ascc1","Ascc3","Astl","Atf3","Atf6b","Atm","Atmin","Atp8b1","Atraid","BC094916","Bahcc1","Bak1","Bambi","Batf","Batf2","Baz1a","Bcas3","Bcl2l12",…
GO:0005975	4	carbohydrate metabolic process	165	800	96.7569	2.10092e-12	7.31861e-11	["Abcc5","Abcc8","Adamts7","Adamtsl1","Aldh2","Alg10b","Alg11","Amdhd2","Aoah","Arsb","Atf3","B3gat3","B3gnt3","B3gnt8","B4galt1","B4galt4","B4galt6","B4gat1","Cacna1a","Cd44","Cds2","Chia1","Chst12","Chst14","Chst3","Cln5","Cmas","Cnot7","Cpt1a","Ctsa","Dolpp1","Dpm2","Dpm3","Dsel","Edem1","Eno1","Eno1b","Ext1","Ext2","Fuca1","Fut8","G6pc2","Gaa","Galm","Galnt12","Galt","Ganc","Gbe1","Gcnt1","Gc…
GO:0031328	7	positive regulation of cellular biosynthetic process	318	1824	220.606	2.33361e-12	8.08324e-11	["Abca1","Abhd14b","Acd","Acsl5","Acvr1b","Adam8","Adcy3","Adcy7","Adcy9","Adm","Adora2a","Adora2b","Aff1","Ahctf1","Ahr","Akna","Ankar","Anxa3","Apobec1","Apoe","Arhgef10l","Arid1b","Arid5a","Arid5b","Arrb1","Ass1","Atf3","Atf6b","Atmin","Bambi","Batf","Bcas3","Bcl2l12","Bcl3","Bcl9l","Calcoco1","Calcrl","Camk1","Camk1d","Ccl3","Ccl5","Ccpg1","Cd28","Cd38","Cd40","Cdk2","Cdk5rap3","Cdk8","Cebpa"…
GO:0051173	6	positive regulation of nitrogen compound metabolic process	311	1776	214.8	2.44817e-12	8.43242e-11	["Abca1","Abhd14b","Acd","Acvr1b","Adam8","Adcy3","Adcy7","Adcy9","Adm","Adora2a","Adora2b","Aff1","Ahctf1","Ahr","Akna","Ankar","Anxa3","Apobec1","Apoe","Arhgef10l","Arid1b","Arid5a","Arid5b","Arrb1","Ass1","Atf3","Atf6b","Atmin","Babam1","Bak1","Bambi","Batf","Bcas3","Bcl2l12","Bcl3","Bcl9l","Calcoco1","Calcrl","Camk1","Camk1d","Cbx8","Ccl3","Ccpg1","Cd28","Cd38","Cd40","Cdk2","Cdk5rap3","Cdk8"…
GO:0051223	6	regulation of protein transport	159	764	92.4029	2.54021e-12	8.70058e-11	["Abcc8","Abl2","Adam8","Adora2a","Akap6","Ang","Arl2","Arrb1","B3gat3","Bambi","Bcas3","Bcl3","C5ar2","Cacna1a","Cadm1","Camk1","Casp1","Casp4","Ccdc22","Ccl3","Ccl5","Cd274","Cd38","Cd40","Cdkn1a","Cemip","Cep131","Cftr","Chia1","Cib1","Cpt1a","Crebrf","Csf3","Csk","Ctdspl2","Cyb5r1","Dnajc1","Dnm1l","Egfr","Erbb4","Erp29","Ezr","F2r","Fam89b","Fn1","Fzd5","G6pc2","Gbp4","Gja1","Glul","Gpaa1","…
GO:0010629	7	negative regulation of gene expression	274	1522	184.08	2.62703e-12	8.94797e-11	["Acvr1b","Aebp1","Aes","Ago3","Ago4","Ahr","Ang","Arid5a","Arid5b","Arrb1","Atf3","Atp8b1","BC094916","Bahcc1","Bak1","Bcl2l12","Bcl3","Bend6","Bmi1","Cbx4","Cbx6","Cbx7","Cbx8","Cby1","Cc2d1a","Cc2d1b","Ccl3","Ccl5","Cd38","Cd55","Cdk5rap3","Cdkn1a","Cebpa","Cela1","Cipc","Cmklr1","Cnot7","Cops2","Crebrf","Ctla2a","Ctnnbip1","Cyp1b1","Dapk1","Ddx5","Deaf1","Dedd2","Dnajb6","Dnmt1","Dnmt3a","Dnm…
GO:0002758	5	innate immune response-activating signal transduction	69	240	29.0271	2.73835e-12	9.27558e-11	["Adam8","Cnpy3","Ctsb","Ctsl","Cul1","Dusp3","Dusp7","Fadd","Hck","Ifih1","Ikbke","Il1b","Irak2","Irak3","Irf3","Itpr3","Lyn","Map2k1","Map3k1","Map3k14","Mapk8","Marco","Mef2c","Myd88","Nfatc1","Nfatc2","Nfkb1","Nfkb2","Nod1","Nod2","Peli1","Peli2","Pik3r4","Ppp3ca","Prkacb","Prkcd","Psma2","Psma3","Psma4","Psma5","Psma6","Psmb4","Psmb7","Psmc1","Psmc2","Psmc4","Psmc6","Psmd1","Psmd10","Psmd12"…
GO:0010628	7	positive regulation of gene expression	308	1757	212.502	2.78337e-12	9.37627e-11	["Abhd14b","Acvr1b","Adam8","Aff1","Ahctf1","Ahr","Akna","Aldh1a2","Ankar","Anxa3","Apobec1","Arhgef10l","Arid1b","Arid5a","Arid5b","Arrb1","Astl","Atf3","Atf6b","Atmin","Bambi","Batf","Bcas3","Bcl2l12","Bcl3","Bcl9l","Braf","Calcoco1","Camk1","Camk1d","Ccl3","Ccl5","Ccpg1","Cd28","Cd38","Cd40","Cd44","Cdk2","Cdk5rap3","Cdk8","Cebpa","Cela1","Cflar","Chek2","Cib1","Cnot7","Coa3","Creb3l2","Csf2",…
GO:0042592	4	homeostatic process	242	1307	158.077	3.04746e-12	1.02098e-10	["Abca1","Abca12","Abca2","Abl2","Acd","Acp5","Adcy3","Adcy7","Adcy9","Adipor2","Adm","Adra1a","Ahr","Ang","Angptl4","Aplp2","Apoe","Aqp9","Aspscr1","Atm","Atox1","Atp1a2","Atp1a3","Atp1b3","Atp2b2","Atp2c1","Atp6v0a1","Atp6v0d2","Atp6v1a","Atp6v1e1","B2m","Bak1","Bmi1","Cacna1a","Car2","Casp3","Ccdc22","Ccl3","Ccl5","Ccr9","Cd38","Cd40","Cd55","Cebpa","Cftr","Chst3","Ckb","Cln5","Cln6","Cnnm2","…
GO:1901566	5	organonitrogen compound biosynthetic process	133	605	73.1724	3.08543e-12	1.02809e-10	["Aanat","Abcc5","Acot7","Adcy3","Adcy7","Adcy9","Adi1","Adm","Adora2a","Adssl1","Alas1","Aldh1l1","Aldh4a1","Aprt","Arg1","Arg2","Ass1","Atp5d","Atp5g1","Atp6v0a1","B3gat3","B3gnt3","B3gnt8","B4galt1","B4galt4","B4galt6","B4gat1","Bhmt","Calcrl","Cebpa","Cept1","Cers6","Chchd10","Chst12","Chst14","Chst3","Cln8","Coasy","Csnk1g2","Dcakd","Dguok","Dhodh","Dsel","Ext1","Ext2","Extl3","Gamt","Gch1",…
GO:1902679	8	negative regulation of RNA biosynthetic process	222	1174	141.991	3.20076e-12	1.06075e-10	["Aebp1","Aes","Ahr","Arid5a","Arid5b","Arrb1","Atf3","Atp8b1","BC094916","Bahcc1","Bcl3","Bend6","Bmi1","Cbx4","Cbx6","Cbx7","Cbx8","Cby1","Cc2d1a","Cc2d1b","Ccar1","Ccl3","Ccl5","Cd38","Cdk5rap3","Cebpa","Cela1","Cipc","Cmklr1","Cops2","Crebrf","Ctnnbip1","Cyp1b1","Ddx5","Deaf1","Dedd2","Dnajb6","Dnmt1","Dnmt3a","Dnmt3l","Dot1l","Drap1","E2f1","Edn1","Egln1","Egr1","Eno1","Erf","Etv6","Fgfr2","…
GO:0051336	5	regulation of hydrolase activity	235	1263	152.755	3.88873e-12	1.28182e-10	["0610009O20Rik","Abl2","Acap3","Adap1","Adap2","Adcy3","Adcy7","Adcy9","Adora2a","Adra1a","Agap1","Agap3","Agfg1","Agfg2","Ahsa1","Akap6","Als2cl","Ambp","Amot","Ang","Angptl4","Aplp2","Arap2","Arfgef3","Arhgap19","Arhgap22","Arhgap24","Arhgap25","Arhgap27","Arhgap31","Arhgap9","Arhgdia","Arhgef1","Arhgef10l","Arhgef3","Arhgef6","Arhgef7","Arl2","Arrb1","Atp1b3","Bak1","Bcar3","Bcas3","Bcl2l12",…
GO:0045892	8	negative regulation of transcription, DNA-templated	215	1130	136.669	3.93444e-12	1.28995e-10	["Aebp1","Aes","Ahr","Arid5a","Arid5b","Arrb1","Atf3","Atp8b1","BC094916","Bahcc1","Bcl3","Bend6","Bmi1","Cbx4","Cbx6","Cbx7","Cbx8","Cby1","Cc2d1a","Cc2d1b","Cd38","Cdk5rap3","Cebpa","Cela1","Cipc","Cmklr1","Cops2","Crebrf","Ctnnbip1","Cyp1b1","Ddx5","Deaf1","Dedd2","Dnajb6","Dnmt1","Dnmt3a","Dnmt3l","Dot1l","Drap1","E2f1","Edn1","Egln1","Egr1","Eno1","Erf","Etv6","Fgfr2","Flcn","Fnip2","Foxk1",…
GO:0040017	5	positive regulation of locomotion	99	406	49.1042	3.9756e-12	1.29651e-10	["Abcc1","Acp5","Acvr1b","Adam17","Adam8","Amot","Anxa3","Arhgef7","Bcas3","Camk1d","Ccar1","Ccl24","Ccl3","Ccl5","Cd274","Cemip","Cib1","Cmklr1","Coro1a","Cxcl1","Cxcl9","Cxcr3","Cyp1b1","Edn1","Egfr","Erbb4","F10","F2r","F3","Fadd","Flt1","Fn1","Gcnt2","Glipr2","Grb7","Hyal1","Icam1","Il16","Il18","Il1a","Il1b","Il23a","Il6","Il6st","Itga4","Itgb3","Jak2","Kdr","Kitl","Lamb1","Lgr6","Lpar1","Ly…
GO:0071702	5	organic substance transport	327	1896	229.314	4.33981e-12	1.4078e-10	["Aagab","Abca1","Abca12","Abca13","Abca15","Abca2","Abcc1","Abcc3","Abcc5","Abcd1","Acd","Acsl4","Acsl5","Agap1","Agap3","Agfg1","Ahctf1","Akap6","Akr1c18","Ap1b1","Ap1s1","Ap1s3","Ap2a1","Ap3s1","Ap4m1","Ap5b1","Ap5s1","Ap5z1","Apba2","Apobec1","Apoe","Aqp9","Arl2","Arrb1","Aspscr1","Atg7","Atp10a","Atp6v0a1","Atp6v0d2","Atp6v1a","Atp6v1e1","Atp8b1","Aup1","Bcap29","Bcl3","Blzf1","Braf","Cacna1…
GO:0051174	6	regulation of phosphorus metabolic process	290	1639	198.231	4.44298e-12	1.43368e-10	["Abca1","Abl2","Acvr1b","Acvr2a","Adam17","Adam8","Adcy3","Adcy7","Adcy9","Adm","Adora2a","Adora2b","Adra1a","Akap6","Akt1s1","Ambp","Ang","Aplp2","Apoe","Arfgef3","Arrb1","Bak1","Bcar3","Bmper","Braf","C5ar2","Cacul1","Calcrl","Camk1","Casp3","Ccl3","Ccl5","Ccnb3","Ccnyl1","Cd300a","Cd40","Cd44","Cdk5rap3","Cdkn1a","Cebpa","Cemip","Chordc1","Cib1","Cish","Crk","Csf2","Csf3","Csk","Ctdsp1","Ctds…
GO:0045935	7	positive regulation of nucleobase-containing compound metabolic process	305	1744	210.93	4.81219e-12	1.54469e-10	["Abca1","Abhd14b","Acd","Acvr1b","Adam8","Adcy3","Adcy7","Adcy9","Adm","Adora2a","Adora2b","Aff1","Ahctf1","Ahr","Akna","Ankar","Anxa3","Apobec1","Apoe","Arhgef10l","Arid1b","Arid5a","Arid5b","Arrb1","Atf3","Atf6b","Atmin","Babam1","Bak1","Bambi","Batf","Bcas3","Bcl2l12","Bcl3","Bcl9l","Calcoco1","Calcrl","Camk1","Camk1d","Cbx8","Ccl3","Ccpg1","Cd28","Cd38","Cd40","Cdk2","Cdk5rap3","Cdk8","Cebpa…
GO:0044255	4	cellular lipid metabolic process	180	906	109.577	6.03611e-12	1.92747e-10	["Abca1","Abcc1","Abcd1","Abhd12","Acaa2","Acads","Acot1","Acot2","Acot7","Acox3","Acsf2","Acsl4","Acsl5","Acss1","Adipor2","Agpat1","Agpat2","Agpat5","Akr1c18","Alas1","Aldh1a2","Aldh3a2","Alox5ap","Ang","Angptl4","Aoah","Apoe","Arsa","Arsb","Atm","B4galt4","B4galt6","Cbr1","Cdipt","Cds2","Cept1","Cerk","Cers6","Ch25h","Cln6","Cln8","Cotl1","Cpne6","Cpt1a","Crat","Crot","Csnk1g2","Ctsa","Cyp1b1"…
GO:0060548	6	negative regulation of cell death	197	1017	123.002	6.38279e-12	2.02761e-10	["Abcc1","Abl2","Acaa2","Adam17","Adam8","Adora2a","Ahr","Aldh2","Angptl4","Apoe","Arhgdia","Arhgef1","Arrb1","Atg7","Bag6","Bcl2a1b","Bcl2l12","Bcl3","Bmf","Bmi1","Braf","Cacna1a","Camk1d","Casp2","Casp3","Cbx4","Ccl5","Cd38","Cd44","Cdkn1a","Cflar","Cib1","Cln8","Coro1a","Csf2","Csf3","Ctsb","Cxcr3","Dapk1","Ddah2","Ddb1","Dnajb6","Dock8","Draxin","Dusp1","Edn1","Egfr","Egr1","Eif2ak2","Erbb4",…
GO:0007167	7	enzyme linked receptor protein signaling pathway	178	894	108.126	6.58179e-12	2.08005e-10	["Abl2","Acvr1b","Acvr2a","Adam12","Adam17","Adcy3","Adcy7","Adcy9","Adora2a","Ago3","Ago4","Akt1s1","Angpt2","Ap2a1","Ap3s1","Appl1","Arhgdia","Arhgef1","Arhgef3","Arhgef6","Arhgef7","Arid5b","Arpc4","Atp6v0a1","Atp6v0d2","Atp6v1a","Atp6v1e1","Baiap2","Bambi","Blnk","Braf","Brk1","Casp2","Casp3","Casp9","Cd28","Cdk8","Cdkn1a","Crk","Csk","Cyba","Cybb","Cyfip1","Ddr1","Dgkd","Dok1","Dusp3","Dusp7…
GO:0002237	5	response to molecule of bacterial origin	101	421	50.9183	6.79654e-12	2.1369e-10	["Abca1","Abcc3","Abcc5","Abcc8","Acp5","Adam17","Adm","Aldh2","Arg1","Arg2","Ass1","B2m","Casp1","Casp3","Casp9","Cbr1","Ccl5","Cd180","Cd300lb","Cd40","Cdk19","Cfb","Cnp","Cnr2","Csf2","Csf2rb","Csf3","Cxcl1","Cxcl9","Dnmt1","Edn1","Eif2ak2","Entpd1","F2r","F3","Fcgr2b","Fcgr4","Fn1","Fzd5","Gch1","Gfi1","Gng12","Hdac5","Hp","Icam1","Il12a","Il12b","Il18","Il1a","Il1b","Il6","Irak3","Irf3","Irf…
GO:0051253	7	negative regulation of RNA metabolic process	227	1217	147.192	7.26927e-12	2.27387e-10	["Aebp1","Aes","Ahr","Arid5a","Arid5b","Arrb1","Atf3","Atp8b1","BC094916","Bahcc1","Bcl3","Bend6","Bmi1","Cbx4","Cbx6","Cbx7","Cbx8","Cby1","Cc2d1a","Cc2d1b","Ccar1","Ccl3","Ccl5","Cd38","Cdk5rap3","Cebpa","Cela1","Cipc","Cmklr1","Cops2","Crebrf","Ctnnbip1","Cyp1b1","Ddx5","Deaf1","Dedd2","Dhx34","Dnajb6","Dnmt1","Dnmt3a","Dnmt3l","Dot1l","Drap1","E2f1","Edn1","Egln1","Egr1","Eno1","Erf","Etv6","…
GO:0043436	5	oxoacid metabolic process	196	1012	122.398	7.35199e-12	2.28807e-10	["Aarsd1","Abcc1","Abcc3","Abcd1","Abhd12","Acaa2","Acads","Acot1","Acot2","Acot7","Acox3","Acsf2","Acsl4","Acsl5","Acss1","Adi1","Adipor2","Adssl1","Ahcyl2","Aldh1a2","Aldh1l1","Aldh4a1","Alox5ap","Amdhd2","Arg1","Arg2","Arsb","Ass1","Atg7","Atp8b1","B3gat3","B3gnt3","B4galt1","B4galt4","B4galt6","B4gat1","Bckdha","Bckdk","Bhmt","Cacna1a","Cbr1","Ch25h","Chst12","Chst14","Chst3","Ckb","Cmas","Co…
GO:0006082	4	organic acid metabolic process	199	1032	124.816	7.58989e-12	2.35018e-10	["Aarsd1","Abcc1","Abcc3","Abcd1","Abhd12","Acaa2","Acads","Acot1","Acot2","Acot7","Acox3","Acsf2","Acsl4","Acsl5","Acss1","Adi1","Adipor2","Adssl1","Ahcyl2","Aldh1a2","Aldh1l1","Aldh4a1","Alox5ap","Amdhd2","Arg1","Arg2","Arsb","Ass1","Atg7","Atp8b1","B3gat3","B3gnt3","B4galt1","B4galt4","B4galt6","B4gat1","Bckdha","Bckdk","Bhmt","Cacna1a","Cbr1","Ch25h","Chst12","Chst14","Chst3","Ckb","Cmas","Co…
GO:0008285	6	negative regulation of cell proliferation	146	693	83.8157	7.94138e-12	2.44666e-10	["Adgrg1","Adm","Adora2a","Adora2b","Adra1a","Aldh1a2","Ang","Apoe","Atm","Atraid","B4galt1","Bak1","Casp3","Cblb","Cd164","Cd274","Cd300a","Cd33","Cd37","Cd37 (ENSMUSG00000109208)","Cdkn1a","Cebpa","Cib1","Cnot7","Csk","Ctnnbip1","Ctsl","Cul1","Cxcl1","Cxcr3","Cyp1b1","D930015E06Rik","Ddr1","Dfna5","E2f1","Eef1e1","Eif2ak2","Emp3","Erbb4","F2r","Fcgr2b","Fgfr2","Flcn","Foxo4","Fth1","Fzd5","Gja1…
GO:0045893	8	positive regulation of transcription, DNA-templated	264	1469	177.67	8.34373e-12	2.54505e-10	["Abhd14b","Acvr1b","Adam8","Aff1","Ahctf1","Ahr","Akna","Ankar","Anxa3","Apobec1","Arhgef10l","Arid1b","Arid5a","Arid5b","Arrb1","Atf3","Atf6b","Atmin","Bambi","Batf","Bcas3","Bcl2l12","Bcl3","Bcl9l","Calcoco1","Camk1","Camk1d","Ccl3","Ccpg1","Cd28","Cd38","Cd40","Cdk2","Cdk5rap3","Cdk8","Cebpa","Cela1","Cflar","Chek2","Cib1","Cnot7","Creb3l2","Csf3","Cxcr3","Dbp","Ddx5","Deaf1","Dlx3","Dnajc2",…
GO:1903508	9	positive regulation of nucleic acid-templated transcription	264	1469	177.67	8.34373e-12	2.54505e-10	["Abhd14b","Acvr1b","Adam8","Aff1","Ahctf1","Ahr","Akna","Ankar","Anxa3","Apobec1","Arhgef10l","Arid1b","Arid5a","Arid5b","Arrb1","Atf3","Atf6b","Atmin","Bambi","Batf","Bcas3","Bcl2l12","Bcl3","Bcl9l","Calcoco1","Camk1","Camk1d","Ccl3","Ccpg1","Cd28","Cd38","Cd40","Cdk2","Cdk5rap3","Cdk8","Cebpa","Cela1","Cflar","Chek2","Cib1","Cnot7","Creb3l2","Csf3","Cxcr3","Dbp","Ddx5","Deaf1","Dlx3","Dnajc2",…
GO:0009894	5	regulation of catabolic process	161	788	95.3056	8.58942e-12	2.60565e-10	["1810022K09Rik","Abl2","Acsl5","Adam8","Adamts7","Alpk1","Anapc10","Anapc11","Anapc2","Apoe","Arrb1","Atg7","Atm","Atraid","Bag6","Boc","Bscl2","Casp1","Casp3","Cblb","Ccdc22","Cd93","Cdk5rap3","Cebpa","Chaf1b","Chek2","Chst3","Cnot7","Cpt1a","Crebrf","Csnk1e","Ctsc","Cul1","D430041D05Rik","Dapk1","Dhx34","Dnm1l","Dram1","Egfr","Egln1","Eif2s1","Eva1b","Ezr","Fbxl5","Fbxo22","Fzd5","Gipc1","Gja1…
GO:1903507	9	negative regulation of nucleic acid-templated transcription	218	1159	140.177	8.62741e-12	2.60565e-10	["Aebp1","Aes","Ahr","Arid5a","Arid5b","Arrb1","Atf3","Atp8b1","BC094916","Bahcc1","Bcl3","Bend6","Bmi1","Cbx4","Cbx6","Cbx7","Cbx8","Cby1","Cc2d1a","Cc2d1b","Ccar1","Cd38","Cdk5rap3","Cebpa","Cela1","Cipc","Cmklr1","Cops2","Crebrf","Ctnnbip1","Cyp1b1","Ddx5","Deaf1","Dedd2","Dnajb6","Dnmt1","Dnmt3a","Dnmt3l","Dot1l","Drap1","E2f1","Edn1","Egln1","Egr1","Eno1","Erf","Etv6","Fgfr2","Flcn","Fnip2",…
GO:0044092	4	negative regulation of molecular function	211	1114	134.734	9.79721e-12	2.94445e-10	["Adam15","Adora2a","Aes","Akt1s1","Ambp","Amot","Anapc10","Anapc11","Anapc2","Angptl4","Anxa3","Aplp2","Apoe","Arfgef3","Arg2","Arl2","Arrb1","Atm","Atp1a2","B2m","Bcas3","Bcl2l12","Calu","Camk1","Casp3","Ccl5","Cd300a","Cd44","Cd55","Cdk5rap3","Cdkn1a","Cebpa","Cflar","Chchd10","Chordc1","Cib1","Cish","Cln8","Cmklr1","Cnn3","Cnr2","Col28a1","Csk","Ctnnbip1","Cyp1b1","Deptor","Dgkz","Dnajb6","Du…
GO:1902680	8	positive regulation of RNA biosynthetic process	267	1494	180.694	1.16346e-11	3.4796e-10	["Abhd14b","Acvr1b","Adam8","Aff1","Ahctf1","Ahr","Akna","Ankar","Anxa3","Apobec1","Arhgef10l","Arid1b","Arid5a","Arid5b","Arrb1","Atf3","Atf6b","Atmin","Bambi","Batf","Bcas3","Bcl2l12","Bcl3","Bcl9l","Calcoco1","Camk1","Camk1d","Ccl3","Ccpg1","Cd28","Cd38","Cd40","Cdk2","Cdk5rap3","Cdk8","Cebpa","Cela1","Cflar","Chek2","Cib1","Cnot7","Creb3l2","Csf3","Cxcr3","Dbp","Ddx5","Deaf1","Dlx3","Dnajc2",…
GO:0030335	7	positive regulation of cell migration	93	379	45.8386	1.22488e-11	3.63843e-10	["Abcc1","Acp5","Acvr1b","Adam17","Adam8","Amot","Anxa3","Arhgef7","Bcas3","Camk1d","Ccar1","Ccl24","Ccl3","Ccl5","Cd274","Cemip","Cib1","Cmklr1","Coro1a","Cxcl1","Cxcl9","Cyp1b1","Edn1","Egfr","Erbb4","F10","F2r","F3","Fadd","Flt1","Fn1","Gcnt2","Glipr2","Grb7","Hyal1","Icam1","Il18","Il1a","Il1b","Il23a","Il6","Il6st","Itga4","Itgb3","Jak2","Kdr","Kitl","Lamb1","Lgr6","Lpar1","Lyn","Map2k1","Ma…
GO:0043123	8	positive regulation of I-kappaB kinase/NF-kappaB signaling	54	171	20.6818	1.22844e-11	3.63843e-10	["Abl2","Atp2c1","Cant1","Casp1","Cc2d1a","Ccdc22","Cd40","Cflar","Ecm1","F2r","Fadd","Gja1","Ikbke","Il12b","Il18","Il1a","Il1b","Il23a","Irf3","Lpar1","Ltbr","Map3k14","Map3k3","Mib2","Mtdh","Myd88","Ndfip1","Nod1","Nod2","Peli1","Peli2","Pink1","Prkd1","Rbck1","Rel","S100a4","Shisa5","Slc20a1","Slc35b2","Tab2","Tbk1","Tlr2","Tlr6","Tlr9","Tmed4","Tmem101","Tmem9b","Tnf","Tnfrsf19","Tnfsf10","T…
GO:0019220	7	regulation of phosphate metabolic process	286	1626	196.658	1.2616e-11	3.7187e-10	["Abca1","Abl2","Acvr1b","Acvr2a","Adam17","Adam8","Adcy3","Adcy7","Adcy9","Adm","Adora2a","Adora2b","Adra1a","Akap6","Akt1s1","Ambp","Ang","Aplp2","Apoe","Arfgef3","Arrb1","Bak1","Bcar3","Bmper","Braf","C5ar2","Cacul1","Calcrl","Camk1","Casp3","Ccl3","Ccl5","Ccnb3","Ccnyl1","Cd300a","Cd40","Cd44","Cdk5rap3","Cdkn1a","Cebpa","Cemip","Chordc1","Cib1","Cish","Crk","Csf2","Csf3","Csk","Ctdsp1","Ctds…
GO:1901700	4	response to oxygen-containing compound	293	1676	202.706	1.39861e-11	4.10283e-10	["Aanat","Abca1","Abcc3","Abcc5","Abcc8","Abl2","Acp5","Acsl5","Adam17","Adcy3","Adcy7","Adcy9","Adm","Adprhl2","Agap3","Ahr","Akap6","Akr1c18","Alas1","Aldh1a2","Aldh2","Aldh3a2","Angpt2","Apobec1","Apoe","Aprt","Aqp9","Arg1","Arg2","Arsa","Ass1","Atox1","Atp1a2","Atp1a3","Atp5g1","Bak1","Bckdha","Bmi1","Braf","Brinp1","Brinp3","Calcrl","Casp1","Casp3","Casp9","Cbr1","Cbx8","Ccl3","Ccl5","Cd180"…
GO:0007169	8	transmembrane receptor protein tyrosine kinase signaling pathway	141	670	81.0339	1.98254e-11	5.78807e-10	["Abl2","Adam12","Adam17","Adcy3","Adcy7","Adcy9","Adora2a","Ago3","Ago4","Akt1s1","Angpt2","Ap2a1","Ap3s1","Appl1","Arhgdia","Arhgef1","Arhgef3","Arhgef6","Arhgef7","Arid5b","Arpc4","Atp6v0a1","Atp6v0d2","Atp6v1a","Atp6v1e1","Baiap2","Blnk","Braf","Brk1","Casp2","Casp3","Casp9","Cd28","Cdkn1a","Crk","Csk","Cyba","Cybb","Cyfip1","Ddr1","Dgkd","Dok1","Dusp3","Dusp7","Egfr","Eif4e","Eif4ebp2","Elmo…
GO:0044723	4	single-organism carbohydrate metabolic process	133	621	75.1076	2.11943e-11	6.1584e-10	["Adamts7","Adamtsl1","Alg10b","Alg11","Aoah","Atf3","B3gat3","B3gnt3","B3gnt8","B4galt1","B4galt4","B4galt6","B4gat1","Cacna1a","Cds2","Chst12","Chst14","Cln5","Cmas","Cpt1a","Ctsa","Dolpp1","Dpm2","Dpm3","Edem1","Eno1","Eno1b","Ext1","Ext2","Fuca1","Fut8","G6pc2","Gaa","Galm","Galnt12","Galt","Ganc","Gbe1","Gcnt1","Gcnt2","Gcnt3","Gdpd5","Gfpt2","Gk","Gla","Gm2a","Gnpda1","Gnptg","Gorasp1","Got…
GO:0043122	7	regulation of I-kappaB kinase/NF-kappaB signaling	64	224	27.0919	2.25123e-11	6.51052e-10	["Abl2","Atp2c1","Bcl3","Cant1","Casp1","Cc2d1a","Ccdc22","Cd40","Cflar","Ecm1","F2r","Fadd","Gja1","Ikbke","Il12b","Il18","Il1a","Il1b","Il23a","Irf3","Lpar1","Ltbr","Map3k14","Map3k3","Mib2","Mtdh","Myd88","Ndfip1","Nlrc3","Nlrp3","Nlrx1","Nod1","Nod2","Optn","Otud7b","Peli1","Peli2","Pink1","Prkd1","Psmd10","Rbck1","Rel","S100a4","Shisa5","Slc20a1","Slc35b2","Tab2","Tbk1","Tle1","Tlr2","Tlr6",…
GO:1903034	6	regulation of response to wounding	98	412	49.8298	2.34772e-11	6.75768e-10	["Acp5","Adam8","Adamts12","Adamts18","Adora2a","Adora2b","Alox5ap","Aoah","Apoe","Braf","Calcrl","Casp1","Casp4","Ccl24","Ccl3","Ccl5","Cd28","Cd55","Cdk19","Cfb","Cnr2","Ctla2a","Edn1","Egfr","Enpp4","Epha4","F2r","F3","Fcgr2b","Fcgr3","Gja1","Gpx1","Gsn","Hck","Hpse","Hyal2","Ier3","Il12b","Il17ra","Il18","Il1b","Il1rl2","Il20rb","Il23a","Il6","Il6st","Jak2","Lbh","Lyn","Map2k1","Mefv","Metrnl…
GO:2000147	6	positive regulation of cell motility	94	389	47.0481	2.37479e-11	6.80366e-10	["Abcc1","Acp5","Acvr1b","Adam17","Adam8","Amot","Anxa3","Arhgef7","Bcas3","Camk1d","Ccar1","Ccl24","Ccl3","Ccl5","Cd274","Cemip","Cib1","Cmklr1","Coro1a","Cxcl1","Cxcl9","Cyp1b1","Edn1","Egfr","Erbb4","F10","F2r","F3","Fadd","Flt1","Fn1","Gcnt2","Glipr2","Grb7","Hyal1","Icam1","Il18","Il1a","Il1b","Il23a","Il6","Il6st","Itga4","Itgb3","Jak2","Kdr","Kitl","Lamb1","Lgr6","Lpar1","Lyn","Map2k1","Ma…
GO:0051254	7	positive regulation of RNA metabolic process	271	1532	185.29	2.49756e-11	7.12211e-10	["Abhd14b","Acvr1b","Adam8","Aff1","Ahctf1","Ahr","Akna","Ankar","Anxa3","Apobec1","Arhgef10l","Arid1b","Arid5a","Arid5b","Arrb1","Atf3","Atf6b","Atmin","Bambi","Batf","Bcas3","Bcl2l12","Bcl3","Bcl9l","Calcoco1","Camk1","Camk1d","Ccl3","Ccpg1","Cd28","Cd38","Cd40","Cdk2","Cdk5rap3","Cdk8","Cebpa","Cela1","Cflar","Chek2","Cib1","Cnot7","Creb3l2","Csf3","Cxcr3","Dbp","Ddx5","Deaf1","Dlx3","Dnajc2",…
GO:0051348	6	negative regulation of transferase activity	84	333	40.2751	2.65818e-11	7.54504e-10	["Adora2a","Akt1s1","Anapc10","Anapc11","Anapc2","Apoe","Atm","Casp3","Cd300a","Cdk5rap3","Cdkn1a","Cebpa","Chchd10","Chordc1","Cib1","Cish","Cln8","Csk","Deptor","Dusp1","Dusp16","Dusp2","Dusp3","Dusp7","Gadd45b","Gadd45g","Hhex","Hyal2","Il1b","Il6","Inppl1","Irak3","Limk1","Lrp5","Lyn","Mad2l1bp","Midn","Nck1","Nf2","Pdcd4","Phpt1","Pinx1","Pkib","Pkig","Pkn1","Pparg","Ppp2r5a","Prkag2","Prkcd…
GO:0080135	5	regulation of cellular response to stress	124	568	68.6974	2.75068e-11	7.77162e-10	["Akt1s1","Ambp","Atg7","Atm","Babam1","Bak1","Bcl2l12","Braf","Casp9","Cbx8","Cd44","Chordc1","Crebrf","Crk","Ddx5","Dnajb6","Dnajc2","Dusp3","Dvl2","Edn1","Eef1e1","Egfr","Eif2ak2","Epha4","Erp29","Fgd4","Fkbp4","Fzd5","Gab1","Gadd45b","Gadd45g","Gpx1","Hk3","Hmga1","Hmga2","Hp","Hspa8","Htra2","Ier3","Il1a","Il1b","Kcnk2","Larp1","Ltbr","Lyn","Map2k1","Map3k1","Map3k11","Map3k3","Map3k9","Map4…
GO:0045321	3	leukocyte activation	104	449	54.3048	3.10118e-11	8.72171e-10	["Abl2","Adam17","Ahr","Anxa3","B2m","Batf","Batf2","Bcl3","Blnk","Braf","Cadm1","Casp1","Cblb","Ccl3","Ccl5","Cd151","Cd180","Cd28","Cd40","Cd93","Cmtm7","Coro1a","Csf2","Cxcr4","Dock8","Edn1","Egr1","Fadd","Fcgr2b","Fcgr3","Fcgr4","Fyb","Fzd5","Gadd45g","Gpr183","Hdac5","Hhex","Hs1bp3","Hyal2","Icam1","Il11ra1","Il12b","Il18","Il23a","Il6","Itga4","Itgal","Jmjd6","Kif13b","Lat2","Lcp1","Lcp2","…
GO:0051704	2	multi-organism process	246	1364	164.971	3.20109e-11	8.96158e-10	["Acp5","Adam17","Adamts4","Adipor2","Adm","Akr1c18","Ambp","Anxa3","Ap1b1","Ap1s1","Ap1s3","Ap2a1","Aplp2","Apobec1","Apoe","Arg1","Atg7","Atp6v0a1","Atp6v0d2","Atp6v1a","Atp6v1e1","B2m","B4galt1","Baiap2","Bak1","Batf","Batf2","Bcl3","Casp1","Ccl3","Ccl5","Cd28","Cd37","Cd37 (ENSMUSG00000109208)","Cd38","Cd40","Cd55","Cd93","Cebpa","Cflar","Chmp6","Cln8","Cntnap2","Col16a1","Cotl1","Crebrf","Cu…
GO:0070887	4	cellular response to chemical stimulus	285	1633	197.505	3.3332e-11	9.28903e-10	["Aanat","Abca1","Abcc8","Abl2","Abtb2","Acaa2","Acsl5","Acvr2a","Adam8","Adamts12","Adamts7","Adcy3","Adcy7","Adcy9","Adprhl2","Adssl1","Agap3","Ahr","Akap6","Akr1c18","Alas1","Aldh1a2","Aldh2","Alox5ap","Angpt2","Ap1s1","Apobec1","Apoe","Aprt","Aqp9","Arg1","Arg2","Arhgdia","Ass1","Atg7","Atp13a2","Atp1a2","Atp1a3","Bcas3","Bmi1","Braf","Brinp1","Brinp3","Calcrl","Casp1","Casp3","Casp9","Cbx8",…
GO:0001817	5	regulation of cytokine production	122	558	67.488	3.59369e-11	9.96964e-10	["Abl2","Acp5","Adam17","Adam8","Adora2b","Agpat1","Agpat2","Arrb1","Bcl3","C5ar2","Cadm1","Casp1","Casp4","Ccl3","Ccl5","Cd274","Cd28","Cd40","Chia1","Cmklr1","Csf2","Csk","Cyba","Cyp1b1","Ebi3","Eif2ak2","F2r","Fadd","Fcgr2b","Fcgr3","Fn1","Fzd5","Gbp4","Heg1","Hpse","Hyal2","Ifih1","Igf2bp1","Igf2bp2","Ikbke","Il12a","Il12b","Il17ra","Il18","Il1a","Il1b","Il1f5","Il1f9","Il1rl2","Il20rb","Il23…
GO:0031329	6	regulation of cellular catabolic process	143	688	83.211	3.64009e-11	1.00529e-09	["1810022K09Rik","Abl2","Acsl5","Adam8","Adamts7","Alpk1","Anapc10","Anapc11","Anapc2","Apoe","Arrb1","Atg7","Atm","Atraid","Bag6","Boc","Casp1","Casp3","Ccdc22","Cd93","Cdk5rap3","Cebpa","Chaf1b","Chst3","Cnot7","Cpt1a","Csnk1e","Ctsc","Cul1","D430041D05Rik","Dapk1","Dhx34","Dnm1l","Dram1","Egln1","Eif2s1","Eva1b","Ezr","Fbxl5","Fbxo22","Fzd5","Gipc1","Gna12","Gpx1","Hfe","Hp","Hspbp1","Htra2","…
GO:0032496	5	response to lipopolysaccharide	96	405	48.9832	4.61051e-11	1.26758e-09	["Abca1","Abcc3","Abcc5","Abcc8","Acp5","Adam17","Adm","Aldh2","Arg1","Arg2","Ass1","Casp1","Casp3","Casp9","Cbr1","Ccl5","Cd180","Cd300lb","Cd40","Cdk19","Cfb","Cnp","Cnr2","Csf2","Csf2rb","Csf3","Cxcl1","Cxcl9","Dnmt1","Edn1","Eif2ak2","Entpd1","F2r","F3","Fcgr2b","Fcgr4","Fn1","Gch1","Gfi1","Gng12","Hdac5","Hp","Icam1","Il12a","Il12b","Il18","Il1a","Il1b","Il6","Irak3","Irf3","Irf8","Jak2","Lc…
GO:0001819	6	positive regulation of cytokine production	90	371	44.871	5.04899e-11	1.37579e-09	["Abl2","Adam17","Adam8","Adora2b","Agpat1","Agpat2","Bcl3","Cadm1","Casp1","Casp4","Ccl3","Ccl5","Cd274","Cd28","Cd40","Chia1","Csf2","Cyba","Cyp1b1","Ebi3","Eif2ak2","F2r","Fadd","Fcgr3","Fzd5","Heg1","Hpse","Hyal2","Ifih1","Il12a","Il12b","Il17ra","Il18","Il1a","Il1b","Il1f9","Il1rl2","Il20rb","Il23a","Il27","Il6","Il6ra","Il6st","Irf3","Irf5","Irf8","Jak2","Myd88","Nfam1","Nfkb1","Nfkb2","Nlr…
GO:0002768	7	immune response-regulating cell surface receptor signaling pathway	90	371	44.871	5.04899e-11	1.37579e-09	["Ago3","Ago4","Akt1s1","Arpc4","Baiap2","Brk1","Cacnb3","Casp9","Cd28","Cd38","Cd40","Cdkn1a","Crk","Csk","Cul1","Cyfip1","Egfr","Elmo2","Erbb4","Fcgr3","Fcgrt","Fgfr2","Foxo3","Foxo4","Fyb","Gab1","Hck","Il1b","Inpp5d","Itpr3","Klhl6","Lat2","Lcp2","Limk1","Lyn","Map2k1","Map3k1","Map3k14","Mapk8","Mef2c","Myo10","Nck1","Nckipsd","Nfam1","Nfatc1","Nfatc2","Nfkb1","Nfkb2","Nrg1","Pdgfa","Pdgfrb"…
GO:0043410	8	positive regulation of MAPK cascade	104	454	54.9096	6.16462e-11	1.67236e-09	["Abl2","Adam8","Adora2b","Adra1a","Arrb1","Bmper","Braf","C5ar2","Ccl3","Cd40","Cd44","Cib1","Crk","Csk","Cxcr4","Dvl2","Edn1","Egfr","Eif2ak2","Epha4","Erbb4","Erp29","F2r","Fgd4","Fgfr2","Flt1","Fpr1","Fzd5","Gab1","Gadd45b","Gadd45g","Gcnt2","Glipr2","Gpr183","Icam1","Igfbp4","Il1a","Il1b","Il6","Il6ra","Irak2","Itgb3","Jak2","Kdr","Kitl","Ksr1","Lamtor1","Lif","Lpar1","Ltbr","Maged1","Map2k1…
GO:1901360	4	organic cyclic compound metabolic process	656	4368	528.293	6.51821e-11	1.76049e-09	["Aanat","Aarsd1","Abca1","Abca2","Abcc1","Abcc3","Acaa2","Acd","Acot7","Acp5","Adcy3","Adcy7","Adcy9","Adm","Adora2a","Adssl1","Aebp1","Aes","Aff1","Ago3","Ago4","Ahctf1","Ahcyl2","Ahr","Akna","Akr1c18","Alas1","Aldh1l1","Aldh4a1","Ambp","Ang","Anp32a","Ap1s1","Ap5s1","Ap5z1","Aplp2","Apoa1bp","Apobec1","Apoe","Aprt","Arhgap22","Arid1b","Arid5a","Arid5b","Arrb1","Ascc1","Ascc3","Atf3","Atf6b","A…
GO:0008284	6	positive regulation of cell proliferation	172	880	106.433	7.11193e-11	1.91242e-09	["Abcc4","Adam17","Adgrg1","Adm","Adora2b","Akr1c18","Aldh1a2","Ang","Arg1","Atf3","B4galt1","Bambi","Bmi1","Brk1","Bst1","C5ar2","Cacul1","Calcrl","Capn1","Cbx8","Ccar1","Ccl24","Ccl5","Ccpg1","Cd274","Cd28","Cd38","Cd40","Cd55","Cdca7l","Cdk2","Cdkn1a","Cep131","Cib1","Cnot7","Coro1a","Csf2","Csf3","Ctc1","Cxcl1","Cxcr3","Cyba","E2f1","Ebi3","Ecm1","Edn1","Egfr","Egr1","Erbb4","F2r","F3","Fadd"…
GO:0006790	4	sulfur compound metabolic process	88	362	43.7825	7.35437e-11	1.96898e-09	["Acaa2","Acot1","Acot2","Acot7","Acot9","Acsl4","Acsl5","Acss1","Adi1","Ahcyl2","Arsb","B3gat3","B3gnt3","B4galt1","B4galt4","B4galt6","B4gat1","Bhmt","Cacna1a","Chst12","Chst14","Chst3","Dld","Dnmt1","Dnmt3a","Dsel","Egfr","Enpp1","Ethe1","Ext1","Ext2","Extl3","Gamt","Gcdh","Ggct","Got1","Gpc6","Gpx1","Gsr","Gstm5","Gsto1","Gstt1","Gstt3","Haghl","Hexb","Hlcs","Hmgcl","Hnf4a","Hpgds","Hpse","Hs…
GO:0071310	5	cellular response to organic substance	241	1344	162.552	9.22273e-11	2.45846e-09	["Aanat","Abca1","Abcc8","Abl2","Acsl5","Acvr2a","Adamts12","Adamts7","Adcy3","Adcy7","Adcy9","Ahr","Akap6","Akr1c18","Alas1","Aldh1a2","Aldh2","Angpt2","Ap1s1","Apobec1","Apoe","Aprt","Aqp9","Arg1","Arg2","Arhgdia","Ass1","Atp1a2","Atp1a3","Bcas3","Bmi1","Brinp1","Brinp3","Calcrl","Casp1","Casp3","Casp9","Ccl3","Ccl5","Cd180","Cd300lb","Cd40","Cd44","Cdk19","Cdk2","Cebpa","Cftr","Cib1","Col16a1"…
GO:0030155	5	regulation of cell adhesion	135	647	78.2522	9.86947e-11	2.61947e-09	["Abl2","Acp5","Adam15","Adam8","Adamts18","Adgrg1","Adora2a","Angpt2","Arhgdia","Arhgef7","Arl2","Ass1","Bcas3","Bmi1","Braf","Casp3","Cblb","Ccl5","Cd164","Cd274","Cd28","Cd300a","Cd44","Cd55","Cib1","Col16a1","Coro1a","Csk","Ctla2a","Cyp1b1","Cytip","D930015E06Rik","Ddr1","Dscaml1","Dusp3","Ebi3","Emilin1","Epha7","Fadd","Fbln2","Fes","Flcn","Flot2","Fn1","Gcnt2","Gsn","Gtpbp4","Hsd17b12","Hya…
GO:0009725	4	response to hormone	191	1009	122.035	1.04876e-10	2.77153e-09	["Aanat","Abca2","Abcc3","Abcc5","Abcc8","Acads","Acot2","Acsl5","Adcy3","Adcy7","Adcy9","Adm","Adra1a","Ahr","Akr1c18","Alas1","Aldh1a2","Aldh2","Ang","Anxa3","Apobec1","Apoe","Aprt","Arg1","Arg2","Arsa","Arsb","Ass1","Atp1a2","Atp1a3","Bcas3","Bckdha","Bmi1","Braf","C1qb","Car2","Casp3","Casp9","Cblb","Cbr1","Ccl5","Cd38","Cd55","Cdk2","Cdkn1a","Cebpa","Cfb","Cftr","Csk","Ctsb","Ctsl","Cxcl1","…
GO:0009719	3	response to endogenous stimulus	262	1492	180.452	1.19702e-10	3.14453e-09	["Aanat","Abca1","Abca2","Abcc3","Abcc4","Abcc5","Abcc8","Acads","Acot2","Acsl5","Acvr2a","Adam17","Adamts12","Adamts7","Adcy3","Adcy7","Adcy9","Adm","Adora2a","Adra1a","Ahr","Akap6","Akr1c18","Alas1","Aldh1a2","Aldh2","Ang","Anxa3","Apobec1","Apoe","Aprt","Aqp9","Arg1","Arg2","Arsa","Arsb","Ass1","Atp1a2","Atp1a3","Bcas3","Bckdha","Bhmt","Bmi1","Braf","C1qb","Car2","Casp1","Casp3","Casp9","Cblb"…
GO:0043069	7	negative regulation of programmed cell death	180	938	113.448	1.20016e-10	3.14453e-09	["Abl2","Acaa2","Adam17","Adam8","Adora2a","Aldh2","Angptl4","Apoe","Arhgdia","Arrb1","Atg7","Bag6","Bcl2a1b","Bcl2l12","Bcl3","Bmf","Bmi1","Braf","Cacna1a","Camk1d","Casp2","Casp3","Cbx4","Ccl5","Cd38","Cd44","Cdkn1a","Cflar","Cib1","Cln8","Coro1a","Csf2","Cxcr3","Dapk1","Ddah2","Ddb1","Dnajb6","Dock8","Draxin","Dusp1","Edn1","Egfr","Egr1","Eif2ak2","Erbb4","F2r","Fadd","Fcgr2b","Fn1","Fzd3","Ga…
GO:1901137	5	carbohydrate derivative biosynthetic process	95	406	49.1042	1.2332e-10	3.21734e-09	["Abcc5","Acot7","Adcy3","Adcy7","Adcy9","Adm","Adora2a","Adssl1","Alg10b","Alg11","Aprt","Atp5d","Atp5g1","Atp6v0a1","B3gat3","B3gnt3","B3gnt8","B4galt1","B4galt4","B4galt6","B4gat1","Calcrl","Cant1","Chchd10","Chst12","Chst14","Chst3","Cmas","Coasy","Ctsa","Dcakd","Dhodh","Dolpp1","Dpm2","Dpm3","Dsel","Ext1","Ext2","Extl3","Gcnt1","Gcnt2","Gfpt2","Gk","Gpaa1","Gpc6","Gucy2e","Guk1","Has1","Hs6s…
GO:2001233	6	regulation of apoptotic signaling pathway	96	412	49.8298	1.25834e-10	3.26901e-09	["Acaa2","Acsl5","Adora2a","Atf3","Bak1","Bcl2a1b","Bcl2l12","Bmf","Bmi1","Casp2","Cd44","Cflar","Csf2","Ctsc","Dapk1","Dedd2","Deptor","Dfna5","Dnm1l","Dynll2","E2f1","Eef1e1","Erp29","Fadd","Flcn","Gpx1","Gsn","Higd1a","Htra2","Hyal2","Icam1","Ier3","Il19","Il1a","Il1b","Inhba","Itga6","Itm2c","Ivns1abp","Jak2","Ltbr","Maged1","Map2k5","Mapk8","Mkl1","Mllt11","Mmp9","Mnt","Nacc2","Nck1","Nck2",…
GO:0051222	6	positive regulation of protein transport	101	442	53.4582	1.34922e-10	3.49033e-09	["Abl2","Adam8","Adora2a","Akap6","Ang","Arrb1","B3gat3","Bambi","Bcas3","Cadm1","Camk1","Casp1","Casp4","Ccl3","Cd274","Cd38","Cemip","Cep131","Cftr","Chia1","Cib1","Crebrf","Csf3","Ctdspl2","Cyb5r1","Dnm1l","Egfr","Erbb4","Ezr","F2r","Fzd5","Gja1","Glul","Hcar2","Hcls1","Htra2","Hyal2","Il12b","Il18","Il1a","Il1b","Il23a","Il6","Irf3","Jak2","Kat2a","Kcnn3","Lrp1","Mcu","Myo18a","Nlrp10","Nlrp3…
GO:0016192	5	vesicle-mediated transport	195	1040	125.784	1.5305e-10	3.94265e-09	["Abca12","Abcc4","Abl2","Adm","Adora2a","Ambp","Anxa3","Ap1b1","Ap1s1","Ap1s3","Ap2a1","Ap3s1","Ap4m1","Apba2","Apoe","Arfgef3","Arhgap27","Arl4c","Arrb1","Bcap29","Blzf1","Cacna1a","Calcrl","Calu","Ccdc22","Ccl3","Ccl5","Cd300a","Cd302","Cd93","Chic2","Clcn5","Col4a1","Col4a2","Coro1a","Coro7","Cpne6","Creb3l2","Csnk1a1","Csnk1e","Csnk1g2","Csnk1g3","Dgkd","Dnm1l","Dtnbp1","Eea1","Egfr","Ehd1",…
GO:0032944	7	regulation of mononuclear cell proliferation	56	192	23.2217	1.65573e-10	4.24739e-09	["Ahr","Atm","Bmi1","Bst1","Casp3","Cblb","Ccl5","Cd274","Cd28","Cd300a","Cd38","Cd40","Cd55","Cdkn1a","Coro1a","D930015E06Rik","Ebi3","Fadd","Fcgr2b","Gpr183","Icam1","Il12a","Il12b","Il13ra1","Il18","Il1b","Il20rb","Il23a","Il27","Il6","Il6st","Inpp5d","Itgal","Lyn","Mef2c","Myd88","Nck1","Nck2","Ndfip1","Nfatc2","Peli1","Pkn1","Pnp","Prdm1","Sash3","Sox11","St6gal1","Syk","Tcf3","Tgfb1","Tnfrs…
GO:0033043	5	regulation of organelle organization	211	1150	139.088	1.92678e-10	4.92213e-09	["1810022K09Rik","2900011O08Rik","Abl2","Acaa2","Acd","Adamts7","Alpk1","Amot","Anapc10","Anapc11","Anapc2","Apobec1","Arhgef10l","Arid5a","Arl2","Arpc4","Arrb1","Atg7","Atm","Baiap2","Bak1","Bcas3","Bmf","Boc","Braf","Brk1","Camk1","Capg","Ccl24","Cd28","Cd93","Cdc42ep2","Cdc42ep3","Cep131","Chaf1b","Chordc1","Chst3","Cib1","Coa3","Coro1a","Crk","Csf2","Csf3","Ctsl","Cul7","Cul9","Cyb5r1","Cyfip…
GO:0006357	8	regulation of transcription from RNA polymerase II promoter	308	1822	220.364	2.05506e-10	5.22803e-09	["Abca2","Abhd14b","Acvr1b","Acvr2a","Aebp1","Aes","Ahr","Akna","Ankar","Arhgef10l","Arid5a","Arid5b","Arrb1","Atf3","Atf6b","BC094916","Batf","Batf2","Bcas3","Bcl2l12","Bcl3","Bcl9l","Bend6","Blzf1","Bmi1","Calcoco1","Camk1","Cbx4","Cbx6","Cbx7","Cbx8","Cc2d1a","Cc2d1b","Ccl3","Ccpg1","Cd28","Cd40","Cdk5rap3","Cdk8","Cdt1","Cebpa","Cela1","Cnot7","Cops2","Creb3l2","Crebrf","Crk","Csf3","Ctdsp1",…
GO:0070663	6	regulation of leukocyte proliferation	57	199	24.0683	2.4696e-10	6.25666e-09	["Ahr","Atm","Bmi1","Bst1","Casp3","Cblb","Ccl5","Cd274","Cd28","Cd300a","Cd38","Cd40","Cd55","Cdkn1a","Coro1a","D930015E06Rik","Ebi3","Fadd","Fcgr2b","Gpr183","Icam1","Il12a","Il12b","Il13ra1","Il18","Il1b","Il20rb","Il23a","Il27","Il6","Il6st","Inpp5d","Itgal","Kitl","Lyn","Mef2c","Myd88","Nck1","Nck2","Ndfip1","Nfatc2","Peli1","Pkn1","Pnp","Prdm1","Sash3","Sox11","St6gal1","Syk","Tcf3","Tgfb1"…
GO:0050670	7	regulation of lymphocyte proliferation	55	190	22.9798	3.28371e-10	8.28495e-09	["Ahr","Atm","Bmi1","Bst1","Casp3","Cblb","Ccl5","Cd274","Cd28","Cd300a","Cd38","Cd40","Cd55","Cdkn1a","Coro1a","D930015E06Rik","Ebi3","Fadd","Fcgr2b","Gpr183","Icam1","Il12a","Il12b","Il13ra1","Il18","Il1b","Il20rb","Il23a","Il27","Il6","Il6st","Inpp5d","Itgal","Lyn","Mef2c","Myd88","Nck1","Nck2","Ndfip1","Nfatc2","Peli1","Pkn1","Pnp","Prdm1","Sash3","Sox11","Syk","Tcf3","Tgfb1","Tnfrsf13b","Tnf…
GO:0033674	7	positive regulation of kinase activity	108	491	59.3846	3.33828e-10	8.3881e-09	["Adam17","Adam8","Adcy3","Adcy7","Adcy9","Adora2b","Akap6","Ang","Arrb1","Bak1","Braf","Cacul1","Camk1","Ccl5","Cd40","Cd44","Cdkn1a","Cemip","Cib1","Crk","Csk","Cxcr4","Dvl2","Edn1","Egfr","Eif2ak2","Epha4","Erbb4","Erp29","F2r","Fgd4","Flt1","Fpr1","Fzd5","Gab1","Gadd45b","Gadd45g","Il1b","Irak2","Itgb3","Jak2","Kitl","Lcp2","Lpar1","Lyn","Maged1","Map2k1","Map2k5","Map3k1","Map3k11","Map3k14"…
GO:0016477	4	cell migration	150	754	91.1934	3.35704e-10	8.40083e-09	["Abcc1","Abl2","Adam17","Adam8","Adamts12","Adgrg1","Amot","Ang","Angpt2","Arhgap24","Arhgef7","Arid5b","Arsb","Astn1","Atp1b3","B4galt1","Bambi","Ccl17","Ccl24","Ccl3","Ccl5","Cd151","Cd44","Cd84","Coro1a","Csf3r","Csk","Cxcl1","Cxcl9","Cxcr3","Cxcr4","Cyp1b1","Dclk1","Ddr1","Dgkz","Dock8","Edn1","Egfr","Elmo2","Epha4","Erbb4","F11r","Fat1","Fat2","Fat3","Fcgr3","Fes","Flt1","Fmnl1","Fmnl3","Fn…
GO:0034097	5	response to cytokine	98	431	52.1278	3.37135e-10	8.40234e-09	["Aanat","Acp5","Acsl4","Adamts12","Adamts7","Aes","Akap6","Aldh1a2","Apoe","Arg1","Arg2","Ass1","Bmi1","Casp3","Ccl3","Ccl5","Cd38","Cftr","Cib1","Coro1a","Cpd","Csf2rb","Csf3","Ctsb","Cxcr4","Cyba","Cyp1b1","Dapk1","Edn1","Eif2ak2","Entpd1","Fn1","Fosl2","Gbp3","Gbp4","Gbp7","Gch1","Hcls1","Hmbs","Htra2","Hyal1","Hyal2","Icam1","Ifi204","Ifnar2","Iigp1","Il12b","Il17ra","Il18","Il3ra","Il6","Il…
GO:0006468	7	protein phosphorylation	162	832	100.627	3.47483e-10	8.62518e-09	["Aatk","Abi3","Abl2","Acvr1b","Acvr2a","Adck1","Adora2b","Alpk1","Alpk2","Arhgef6","Atm","Bckdk","Bmp2k","Braf","Camk1","Camk1d","Ccl3","Ccl5","Cdk15","Cdk18","Cdk19","Cdk2","Cdk20","Cdk8","Cdkn1a","Chek2","Csk","Csnk1a1","Csnk1e","Csnk1g2","Csnk1g3","D8Ertd82e","Dapk1","Dclk1","Ddr1","Dguok","Dok1","Dusp3","Dusp7","Dyrk1b","Egfr","Eif2ak2","Eif2s1","Epha4","Epha7","Erbb4","F2r","Fastk","Fes","F…
GO:0002274	4	myeloid leukocyte activation	38	108	13.0622	4.0786e-10	1.0083e-08	["Anxa3","Batf","Batf2","Casp1","Ccl3","Ccl5","Cd93","Csf2","Cxcr4","Fcgr2b","Fcgr3","Fyb","Hyal2","Jmjd6","Lat2","Lcp2","Ltbr","Milr1","Myo1f","Notch2","Pilrb1","Pirb","Prkcd","Rasgrp1","Rbpj","Relb","Serpine1","Slc7a2","Stx11","Stxbp3","Syk","Tgfb1","Tgfbr2","Tlr1","Tlr2","Tlr6","Tlr9","Tnfsf9"]
GO:0043066	8	negative regulation of apoptotic process	176	926	111.996	4.24102e-10	1.04425e-08	["Abl2","Acaa2","Adam17","Adam8","Adora2a","Aldh2","Angptl4","Apoe","Arhgdia","Arrb1","Atg7","Bag6","Bcl2a1b","Bcl2l12","Bcl3","Bmf","Bmi1","Braf","Cacna1a","Camk1d","Casp2","Casp3","Cbx4","Ccl5","Cd38","Cd44","Cdkn1a","Cflar","Cib1","Cln8","Coro1a","Csf2","Cxcr3","Dapk1","Ddah2","Ddb1","Dnajb6","Dock8","Draxin","Dusp1","Edn1","Egfr","Egr1","Eif2ak2","Erbb4","F2r","Fadd","Fcgr2b","Fn1","Fzd3","Ga…
GO:0071900	8	regulation of protein serine/threonine kinase activity	101	451	54.5467	4.42785e-10	1.08588e-08	["Adam17","Adam8","Adora2b","Akap6","Apoe","Arrb1","Camk1","Casp3","Ccnb3","Ccnyl1","Cd300a","Cd40","Cdk5rap3","Cdkn1a","Cebpa","Cemip","Chordc1","Cib1","Crk","Csk","Cxcr4","Dusp1","Dusp16","Dusp2","Dusp3","Dusp7","Dvl2","Edn1","Egfr","Epha4","Erp29","Fgd4","Flt1","Fpr1","Fzd5","Gab1","Gadd45b","Gadd45g","Gtpbp4","Hhex","Hyal2","Il1b","Inppl1","Irak2","Irak3","Kitl","Lpar1","Lrp5","Lyn","Maged1",…
GO:0009991	4	response to extracellular stimulus	114	531	64.2224	5.00186e-10	1.22177e-08	["Abca1","Acads","Acot2","Acp5","Acsl4","Acsl5","Adipor2","Adm","Adora2b","Adssl1","Aes","Alas1","Aldh1a2","Angptl4","Apoe","Arg1","Arg2","Arsa","Arsb","Ass1","Atf3","Atg2a","Atg7","Bcas3","Bckdha","Ccl5","Cd44","Cdkn1a","Cebpa","Cp","Ctsl","Cyba","Cybb","Cyp1b1","Dhodh","Dnmt1","Dnmt3a","Egfr","Egr1","Eif2ak2","Eln","Fads1","Fbxo22","Fscn1","Gas2l1","Glul","Gpx1","Gsn","Gsr","Gstt1","Hfe","Higd1…
GO:0071496	4	cellular response to external stimulus	74	295	35.6791	5.23276e-10	1.2731e-08	["Adora2b","Aes","Angptl4","Arhgdia","Atf3","Atg2a","Atg7","Atp1a2","Bak1","Casp1","Casp2","Casp4","Ccl5","Cd40","Cdkn1a","Ctsb","Ctsl","Cyba","Egfr","Egr1","Eln","Fadd","Fads1","Fbxo22","Fscn1","Gas2l1","Gja1","Glul","Habp4","Hfe","Higd1a","Icam1","Il18","Il1b","Itga6","Itgb3","Kcnj2","Lcn2","Ltbr","Ltc4s","Lyn","Map3k1","Map3k14","Mapk8","Mmp3","Mmp9","Mtpn","Mtr","Myd88","Nbr1","Nfe2l2","Nfkb1…
GO:0051186	4	cofactor metabolic process	82	341	41.2426	5.67811e-10	1.37599e-08	["Acaa2","Acot1","Acot2","Acot7","Acot9","Acsl4","Acsl5","Acss1","Ahcyl2","Akr1c18","Akr7a5","Alas1","Aldh1l1","Ambp","Apoa1bp","Bhmt","Cbr1","Cbr3","Coasy","Crot","Dcakd","Dld","Dnmt1","Eno1","Eno1b","Fmo2","Folh1","Gamt","Gcdh","Gch1","Gpd1l","Gpd2","H6pd","Hebp1","Hk2","Hk3","Hlcs","Hmbs","Hmgcl","Hnf4a","Hsd17b12","Idh1","Kcnab2","Mccc2","Mlycd","Mocos","Mri1","Mthfd1","Mthfd1l","Mthfd2l","Mt…
GO:0045860	8	positive regulation of protein kinase activity	102	460	55.6352	6.48001e-10	1.56413e-08	["Adam17","Adam8","Adcy3","Adcy7","Adcy9","Adora2b","Akap6","Ang","Arrb1","Bak1","Braf","Cacul1","Camk1","Ccl5","Cd40","Cdkn1a","Cemip","Cib1","Crk","Csk","Cxcr4","Dvl2","Edn1","Egfr","Eif2ak2","Epha4","Erp29","F2r","Fgd4","Flt1","Fpr1","Fzd5","Gab1","Gadd45b","Gadd45g","Il1b","Irak2","Itgb3","Jak2","Kitl","Lcp2","Lpar1","Maged1","Map2k1","Map2k5","Map3k1","Map3k11","Map3k14","Map3k3","Map3k8","M…
GO:0042327	9	positive regulation of phosphorylation	171	898	108.61	6.54283e-10	1.5731e-08	["Abl2","Acvr1b","Acvr2a","Adam17","Adam8","Adcy3","Adcy7","Adcy9","Adora2b","Adra1a","Akap6","Ang","Arrb1","Bak1","Bcar3","Bmper","Braf","C5ar2","Cacul1","Camk1","Ccl3","Ccl5","Cd40","Cd44","Cdkn1a","Cemip","Cib1","Crk","Csf2","Csf3","Csk","Cxcr4","Dvl2","Edn1","Egfr","Eif2ak2","Epha4","Erbb4","Erp29","F2r","Fam129a","Fgd4","Fgfr2","Flcn","Flt1","Fnip2","Fpr1","Fzd5","Gab1","Gadd45b","Gadd45g","…
GO:0048870	3	cell motility	162	839	101.474	6.59457e-10	1.57935e-08	["Abcc1","Abl2","Adam17","Adam8","Adamts12","Adgrg1","Amot","Ang","Angpt2","Arhgap24","Arhgef7","Arid5b","Arsb","Astn1","Atp1b3","B4galt1","Bambi","Brk1","Ccl17","Ccl24","Ccl3","Ccl5","Cd151","Cd44","Cd84","Coro1a","Csf3r","Csk","Cxcl1","Cxcl9","Cxcr3","Cxcr4","Cyp1b1","Dclk1","Ddr1","Dgkz","Dnah5","Dock8","Drc1","Edn1","Egfr","Elmo2","Epha4","Erbb4","F11r","Fat1","Fat2","Fat3","Fcgr3","Fes","Flt…
GO:0043547	7	positive regulation of GTPase activity	101	455	55.0305	7.38414e-10	1.76156e-08	["Acap3","Adap1","Adap2","Agap1","Agap3","Agfg1","Agfg2","Als2cl","Arap2","Arfgef3","Arhgap19","Arhgap22","Arhgap24","Arhgap25","Arhgap27","Arhgap31","Arhgap9","Arhgdia","Arhgef1","Arhgef10l","Arhgef3","Arhgef6","Arhgef7","Arrb1","Bcar3","Bcas3","Ccl24","Cd40","Cdc42ep2","Cdc42ep3","Dennd3","Dennd4c","Dnmbp","Dock10","Dock8","F11r","Fbxo8","Fgd2","Fgd4","Fgd6","Gipc1","Git1","Hmha1","Icam1","Itsn…
GO:0019752	6	carboxylic acid metabolic process	170	894	108.126	8.20142e-10	1.94895e-08	["Aarsd1","Abcc1","Abcc3","Abcd1","Abhd12","Acaa2","Acads","Acot1","Acot2","Acot7","Acox3","Acsf2","Acsl4","Acsl5","Acss1","Adi1","Adipor2","Adssl1","Ahcyl2","Aldh1a2","Aldh1l1","Aldh4a1","Alox5ap","Amdhd2","Arg1","Arg2","Ass1","Atg7","Atp8b1","Bckdha","Bckdk","Bhmt","Cacna1a","Cbr1","Ch25h","Chst12","Chst14","Ckb","Cmas","Cotl1","Cpt1a","Crat","Crot","Cyp1b1","Cyp27a1","Cyp2j8","Cyp4f13","D2hgdh…
GO:0051130	5	positive regulation of cellular component organization	217	1210	146.345	8.44208e-10	1.99839e-08	["1810022K09Rik","Abl2","Adamts7","Adgrb2","Adgrl2","Adgrl3","Ahr","Alpk1","Amot","Anapc11","Anapc2","Apoe","Arhgdia","Arhgef10l","Arhgef7","Arid5a","Arl2","Arpc4","Arrb1","Arsb","Baiap2","Bak1","Bambi","Bcas3","Bcl9l","Bmf","Boc","Braf","Brk1","Camk1","Camk1d","Capg","Ccl24","Cd28","Cd93","Cdc42ep2","Cdc42ep3","Cemip","Chaf1b","Chst3","Cib1","Coa3","Cobl","Col16a1","Cpne6","Csf2","Csf3","Cul7","…
GO:0006928	4	movement of cell or subcellular component	243	1390	168.115	9.23209e-10	2.177e-08	["Abcc1","Abi3","Abl2","Actr10","Adam17","Adam8","Adamts12","Adgrg1","Amot","Ang","Angpt2","Ap2a1","Ap3s1","Arhgap24","Arhgap39","Arhgdia","Arhgef7","Arid5b","Arpc4","Arsb","Astn1","Atp1b3","B4galt1","B4gat1","Bambi","Boc","Brk1","Cacnb2","Cacnb3","Ccl17","Ccl24","Ccl3","Ccl5","Cd151","Cd44","Cd84","Cep131","Cercam","Cntn6","Col4a1","Col4a2","Col4a5","Col5a3","Coro1a","Csf3r","Csk","Cxcl1","Cxcl9…
GO:0008360	4	regulation of cell shape	42	130	15.723	1.03825e-09	2.43888e-08	["Arhgdia","Atp10a","Baiap2","Bambi","Ccl24","Ccl3","Cdc42ep2","Cdc42ep3","Coro1a","Csnk1a1","Csnk1e","Csnk1g2","Csnk1g3","Cyfip1","Dag1","Ezr","Fblim1","Fes","Fgd2","Fgd4","Fgd6","Fmnl1","Fmnl3","Fn1","Gas7","Gna12","Hck","Hexb","Icam1","Il6","Kdr","Myo10","Parvb","Plxnb2","Prpf40a","Pxn","Rhoj","Rhoq","Rhou","Sema4a","Sept7","Syne3"]
GO:0050865	5	regulation of cell activation	104	476	57.5704	1.04898e-09	2.4547e-08	["Adam8","Adamts18","Adora2a","Adora2b","Ahr","Apoe","Atm","Bmi1","Bst1","Casp3","Cblb","Ccl5","Cd274","Cd28","Cd300a","Cd300lb","Cd37","Cd37 (ENSMUSG00000109208)","Cd38","Cd40","Cd55","Cdkn1a","Cnr2","Coro1a","Csk","Ctla2a","D930015E06Rik","Dusp3","Ebi3","Fadd","Fcgr2b","Fes","Flot2","Gpr183","Gsn","Hps1","Icam1","Il12a","Il12b","Il13ra1","Il18","Il1b","Il1rl2","Il20rb","Il23a","Il27","Il6","Il6…
GO:0009653	3	anatomical structure morphogenesis	260	1514	183.113	1.34959e-09	3.14614e-08	["2700049A03Rik","Abl2","Acd","Acp5","Acvr2a","Adam15","Adam8","Adm","Adora2a","Aes","Ahr","Aldh1a2","Amot","Angpt2","Antxr1","Apoe","Arid5b","Atg7","Atmin","Atp2b2","B4galt1","Baiap2","Bak1","Bcar3","Bmi1","Braf","C2cd3","Cacna1a","Cadm1","Car2","Cc2d2a","Cd44","Cela1","Cnp","Col11a1","Col11a2","Col4a1","Commd5","Csf3r","Csk","Csnk1a1","Ctnnbip1","Ctsd","Ctsl","Cul1","Cul7","Cxcr4","Cyp1b1","Dag…
GO:0001934	9	positive regulation of protein phosphorylation	165	867	104.86	1.37847e-09	3.20129e-08	["Abl2","Acvr1b","Acvr2a","Adam17","Adam8","Adcy3","Adcy7","Adcy9","Adora2b","Adra1a","Akap6","Ang","Arrb1","Bak1","Bcar3","Bmper","Braf","C5ar2","Cacul1","Camk1","Ccl3","Ccl5","Cd40","Cd44","Cdkn1a","Cemip","Cib1","Crk","Csf2","Csf3","Csk","Cxcr4","Dvl2","Edn1","Egfr","Eif2ak2","Epha4","Erbb4","Erp29","F2r","Fam129a","Fgd4","Fgfr2","Flcn","Flt1","Fnip2","Fpr1","Fzd5","Gab1","Gadd45b","Gadd45g","…
GO:0007165	5	signal transduction	810	5637	681.774	1.47839e-09	3.42039e-08	["0610009O20Rik","2700049A03Rik","Aatk","Abca1","Abcc8","Abl2","Acvr1b","Acvr2a","Adam12","Adam15","Adam17","Adam7","Adam8","Adamts18","Adamts19","Adap1","Adap2","Adcy3","Adcy7","Adcy9","Adgrb2","Adgre1","Adgrf1","Adgrg1","Adgrg5","Adgrg6","Adgrl2","Adgrl3","Adipor2","Adm","Adora2a","Adora2b","Adra1a","Aes","Agap1","Agap3","Ago3","Ago4","Ahctf1","Ahr","Akap6","Akr1c18","Akt1s1","Aldh1a2","Amot","…
GO:1903827	6	regulation of cellular protein localization	108	504	60.9569	1.59657e-09	3.67991e-08	["Abca12","Akap6","Appl1","B3gat3","Bambi","Bcas3","Bcl3","Bmf","Camk1","Ccdc22","Cdk5rap3","Cdkn1a","Cemip","Cep131","Cib1","Csf3","Csk","Ctdspl2","Cyb5r1","Dynll2","E2f1","Egfr","Erbb4","Ezr","Fam89b","Flcn","Fzd5","Gbp4","Gpd1l","Gsn","Hcls1","Hnf4a","Htra2","Hyal2","Il12b","Il18","Il1b","Il23a","Il6","Jak2","Kat2a","Kcnab2","Kcnn3","Kif5b","Lcp1","Ldlrap1","Lif","Mapk8","Ndel1","Nedd4l","Nf2"…
GO:0032446	8	protein modification by small protein conjugation	134	669	80.913	1.90499e-09	4.37433e-08	["Anapc10","Anapc11","Anapc2","Ap1s1","Arrb1","Atg7","Blmh","Bmi1","Cacul1","Cblb","Cbx4","Cbx8","Cdk5rap3","Cdk8","Cish","Cul1","Cul7","Cul9","Dcaf11","Dcaf15","Dcaf7","Ddb1","Dtx3","Enc1","Fbxl5","Fbxl6","Fbxo21","Fbxo22","Fbxo30","Fbxo6","Gan","Hectd3","Herc3","Herc6","Ifih1","Kctd13","Kdm2b","Klhl17","Klhl21","Klhl25","Klhl36","Lnx1","Lrrc41","Map3k1","March1","March2","March6","March8","Med2…
GO:0045184	4	establishment of protein localization	229	1304	157.714	1.94536e-09	4.45038e-08	["Aagab","Abca1","Acd","Agap1","Agap3","Ahctf1","Akap6","Akr1c18","Ap1b1","Ap1s1","Ap1s3","Ap2a1","Ap3s1","Ap4m1","Ap5b1","Ap5s1","Ap5z1","Apba2","Apobec1","Apoe","Arrb1","Aspscr1","Atg7","Atp10a","Atp6v0a1","Atp6v0d2","Atp6v1a","Atp6v1e1","Aup1","Bag6","Bcap29","Bcl3","Blzf1","Braf","Calcrl","Cblb","Ccdc22","Chmp6","Coro7","Crlf2","Ctsa","Dag1","Dennd4c","Dgkd","Dusp16","Egfr","Ehd1","Erp29","F1…
GO:0044087	4	regulation of cellular component biogenesis	138	695	84.0576	1.96963e-09	4.48914e-08	["Adgrb2","Adgrl2","Adgrl3","Ahr","Amot","Apoe","Arhgap24","Arhgef10l","Arl2","Arpc4","Atp8b1","Baiap2","Bcas3","Bmf","Braf","Brk1","Capg","Ccl24","Cdc42ep2","Cdc42ep3","Cobl","Col16a1","Coro1a","Csf2","Csf3","Ctnnbip1","Dag1","Dnajb6","Dnm1l","Edn1","Eif2ak2","Eln","Ezr","Fblim1","Fes","Fhod1","Fkbp4","Fnbp1l","Fzd5","Gda","Gja1","Gsn","H3f3b","Hck","Hcls1","Hnf4a","Hyal1","Icam1","Ift140","Irf8…
GO:0043087	6	regulation of GTPase activity	108	506	61.1988	2.01452e-09	4.57444e-08	["Acap3","Adap1","Adap2","Agap1","Agap3","Agfg1","Agfg2","Als2cl","Amot","Arap2","Arfgef3","Arhgap19","Arhgap22","Arhgap24","Arhgap25","Arhgap27","Arhgap31","Arhgap9","Arhgdia","Arhgef1","Arhgef10l","Arhgef3","Arhgef6","Arhgef7","Arl2","Arrb1","Bcar3","Bcas3","Ccl24","Cd40","Cdc42ep2","Cdc42ep3","Crk","Dennd3","Dennd4c","Dnmbp","Dock10","Dock8","Epha4","F11r","Fbxo8","Fgd2","Fgd4","Fgd6","Gipc1",…
GO:0001933	9	negative regulation of protein phosphorylation	86	374	45.2339	2.27571e-09	5.13611e-08	["Adora2a","Akt1s1","Ambp","Apoe","Arrb1","Bak1","Casp3","Cd300a","Cdk5rap3","Cdkn1a","Cebpa","Chordc1","Cib1","Cish","Csk","Ctdsp1","Ctdsp2","Dag1","Deptor","Dusp1","Dusp16","Dusp2","Dusp3","Dusp7","Enpp1","Fam129a","Flcn","Gadd45b","Gadd45g","Gbp4","Gpd1l","Hhex","Hnf4a","Hyal2","Il18","Il1b","Il6","Inppl1","Irak3","Lif","Lrp5","Lrrk1","Lyn","Mecom","Mical1","Myadm","Nck1","Nck2","Nf2","P2rx7",…
GO:0033993	5	response to lipid	198	1094	132.315	2.27862e-09	5.13611e-08	["Aanat","Abca1","Abca2","Abcc3","Abcc5","Abcc8","Abl2","Acads","Acp5","Acsl5","Adam17","Adm","Ahr","Akr1c18","Aldh1a2","Aldh2","Anxa3","Apoe","Arg1","Arg2","Arsa","Arsb","Ass1","Atp1a2","Atp1a3","Bcas3","Bckdha","Bmi1","Brinp1","Brinp3","C1qb","Car2","Casp1","Casp3","Casp9","Cbr1","Ccl3","Ccl5","Cd180","Cd300lb","Cd38","Cd40","Cd44","Cdk19","Cdk2","Cdkn1a","Cebpa","Cfb","Cftr","Cnp","Cnr2","Cpt1…
GO:0050864	7	regulation of B cell activation	38	114	13.7879	2.37737e-09	5.33908e-08	["Ahr","Atm","Bmi1","Bst1","Casp3","Cd28","Cd300a","Cd38","Cd40","Cdkn1a","Fcgr2b","Gpr183","Il13ra1","Il6","Inhba","Inpp5d","Lyn","Mef2c","Ndfip1","Nfam1","Nfatc2","Nod2","Peli1","Pkn1","Pnp","Prdm1","Samsn1","Sash3","Sla2","Syk","Tcf3","Tgfb1","Thoc1","Tlr9","Tnfrsf13b","Tnfrsf21","Tnfsf13","Tnfsf4"]
GO:0002429	5	immune response-activating cell surface receptor signaling pathway	67	265	32.0507	2.39584e-09	5.3609e-08	["Arpc4","Baiap2","Brk1","Cacnb3","Cd28","Cd38","Crk","Csk","Cul1","Cyfip1","Elmo2","Fyb","Hck","Il1b","Inpp5d","Itpr3","Klhl6","Lat2","Lcp2","Limk1","Lyn","Map3k14","Mef2c","Myo10","Nck1","Nckipsd","Nfam1","Nfatc1","Nfatc2","Nfkb1","Nfkb2","Pik3r2","Pld2","Ppp3ca","Prkacb","Prkcd","Psen2","Psma2","Psma3","Psma4","Psma5","Psma6","Psmb4","Psmb7","Psmc1","Psmc2","Psmc4","Psmc6","Psmd1","Psmd10","Ps…
GO:0006732	5	coenzyme metabolic process	70	282	34.1068	2.45673e-09	5.47718e-08	["Acaa2","Acot1","Acot2","Acot7","Acot9","Acsl4","Acsl5","Acss1","Ahcyl2","Aldh1l1","Apoa1bp","Bhmt","Cbr1","Cbr3","Coasy","Crot","Dcakd","Dld","Dnmt1","Eno1","Eno1b","Fmo2","Folh1","Gamt","Gcdh","Gch1","Gpd1l","Gpd2","H6pd","Hk2","Hk3","Hmgcl","Hnf4a","Hsd17b12","Idh1","Kcnab2","Mccc2","Mlycd","Mocos","Mri1","Mthfd1","Mthfd1l","Mthfd2l","Mtr","Mvk","Nampt","Nmnat3","Nox1","Pank1","Pck2","Pdxk","…
GO:0010562	7	positive regulation of phosphorus metabolic process	191	1050	126.993	2.95557e-09	6.54173e-08	["Abca1","Abl2","Acvr1b","Acvr2a","Adam17","Adam8","Adcy3","Adcy7","Adcy9","Adm","Adora2a","Adora2b","Adra1a","Akap6","Ang","Apoe","Arrb1","Bak1","Bcar3","Bmper","Braf","C5ar2","Cacul1","Calcrl","Camk1","Ccl3","Ccl5","Cd300a","Cd40","Cd44","Cdkn1a","Cemip","Cib1","Crk","Csf2","Csf3","Csk","Cxcl9","Cxcr3","Cxcr4","Dvl2","Edn1","Egfr","Eif2ak2","Epha4","Erbb4","Erp29","F2r","Fam129a","Fgd4","Fgfr2"…
GO:0045937	8	positive regulation of phosphate metabolic process	191	1050	126.993	2.95557e-09	6.54173e-08	["Abca1","Abl2","Acvr1b","Acvr2a","Adam17","Adam8","Adcy3","Adcy7","Adcy9","Adm","Adora2a","Adora2b","Adra1a","Akap6","Ang","Apoe","Arrb1","Bak1","Bcar3","Bmper","Braf","C5ar2","Cacul1","Calcrl","Camk1","Ccl3","Ccl5","Cd300a","Cd40","Cd44","Cdkn1a","Cemip","Cib1","Crk","Csf2","Csf3","Csk","Cxcl9","Cxcr3","Cxcr4","Dvl2","Edn1","Egfr","Eif2ak2","Epha4","Erbb4","Erp29","F2r","Fam129a","Fgd4","Fgfr2"…
GO:0050708	7	regulation of protein secretion	92	412	49.8298	3.06701e-09	6.76397e-08	["Abcc8","Abl2","Adam8","Adora2a","Ang","Arl2","Arrb1","C5ar2","Cacna1a","Cadm1","Casp1","Casp4","Ccl3","Ccl5","Cd274","Cd38","Cd40","Cftr","Chia1","Cpt1a","Dnajc1","Dnm1l","Erp29","Ezr","F2r","Fn1","G6pc2","Gja1","Glul","Hadh","Hcar2","Hnf4a","Hyal2","Ica1","Il1a","Il1b","Il1f5","Il6","Irf3","Itpr3","Jak2","Kcns3","Lrp5","Lyn","Map4k4","Marcks","Mcu","Midn","Myo18a","Nlrp10","Nlrp3","Nod2","Nos2…
GO:0032103	6	positive regulation of response to external stimulus	64	250	30.2365	3.18913e-09	7.00809e-08	["Adam17","Adam8","Adora2b","Alox5ap","Atg7","Braf","Camk1d","Ccl24","Ccl3","Ccl5","Cd180","Cd28","Cdk19","Cmklr1","Cxcl1","Cxcl9","Cxcr3","Cyba","Ddx60","Edn1","Egfr","F3","Fcgr3","Fn1","Hyal2","Il12b","Il16","Il17ra","Il18","Il1b","Il23a","Il6","Il6st","Jak2","Kdr","Larp1","Lpar1","Megf8","Ndel1","Nod2","Nrp1","Osm","Pafah1b2","Pdgfrb","Pf4","Pink1","Prkd1","Ptprj","Rps19","S100a8","S1pr1","Ser…
GO:0051649	4	establishment of localization in cell	297	1792	216.736	3.71811e-09	8.14133e-08	["Abca1","Abca12","Abcc4","Abcd1","Acd","Adm","Adra1a","Agap3","Agfg1","Akap6","Akr1c18","Anp32a","Anxa3","Ap1b1","Ap1s1","Ap1s3","Ap2a1","Ap3s1","Ap4m1","Ap5b1","Ap5s1","Ap5z1","Apba2","Apoe","Arl4c","Arrb1","Arsb","Aspscr1","Atox1","Atp10a","Atp2c1","Atp5d","Atp5g1","Aup1","Bcap29","Bcl3","Blzf1","Cacna1a","Calu","Camk1","Cblb","Ccdc22","Ccl3","Ccl5","Cd300a","Cep131","Chic2","Chmp6","Coro1a","…
GO:0042326	9	negative regulation of phosphorylation	90	402	48.6204	3.97003e-09	8.66201e-08	["Adora2a","Akt1s1","Ambp","Apoe","Arrb1","Bak1","Casp3","Cd300a","Cdk5rap3","Cdkn1a","Cebpa","Chordc1","Cib1","Cish","Csk","Ctdsp1","Ctdsp2","Dag1","Deptor","Dusp1","Dusp16","Dusp2","Dusp3","Dusp7","Enpp1","Fam129a","Flcn","Gadd45b","Gadd45g","Gbp4","Gpd1l","Hhex","Hnf4a","Hyal2","Il18","Il1b","Il6","Inhba","Inppl1","Irak3","Lif","Lrp5","Lrrk1","Lyn","Mecom","Mical1","Midn","Myadm","Nck1","Nck2"…
GO:0055086	4	nucleobase-containing small molecule metabolic process	107	506	61.1988	4.08879e-09	8.8895e-08	["Acot7","Adcy3","Adcy7","Adcy9","Adm","Adora2a","Adssl1","Ahcyl2","Apoa1bp","Apobec1","Aprt","Atp2b2","Atp5d","Atp5g1","Atp6v0a1","Atp6v1a","Bhmt","Calcrl","Cant1","Chchd10","Cmas","Cnp","Coasy","Crot","Dcakd","Dctpp1","Dguok","Dhodh","Dnmt1","Dnmt3a","Eno1","Eno1b","Enpp1","Enpp4","Entpd1","Fmo2","Fut8","Galt","Gamt","Gda","Gfpt2","Gmpr","Gpd1l","Gpd2","Gpx1","Gsr","Gucy2e","Guk1","H6pd","Hk2",…
GO:0033036	3	macromolecule localization	270	1602	193.756	4.12221e-09	8.93048e-08	["Aagab","Abca1","Abca12","Abl2","Acd","Agap1","Agap3","Ahctf1","Akap6","Akr1c18","Als2cl","Amot","Ap1b1","Ap1s1","Ap1s3","Ap2a1","Ap3s1","Ap4m1","Ap5b1","Ap5s1","Ap5z1","Apba2","Apobec1","Apoe","Arrb1","Aspscr1","Atg7","Atg9b","Atp10a","Atp1b3","Atp6v0a1","Atp6v0d2","Atp6v1a","Atp6v1e1","Aup1","Bcap29","Bcl3","Blzf1","C2cd3","Cacna1a","Calcrl","Cblb","Cby1","Ccdc22","Cdan1","Chmp6","Cntnap2","Co…
GO:0050727	6	regulation of inflammatory response	71	291	35.1953	4.15418e-09	8.96805e-08	["Acp5","Adam8","Adamts12","Adora2a","Adora2b","Alox5ap","Aoah","Apoe","Calcrl","Casp1","Casp4","Ccl24","Ccl3","Ccl5","Cd28","Cd55","Cdk19","Cfb","Cnr2","Ctla2a","Egfr","Fcgr2b","Fcgr3","Gpx1","Hck","Hyal2","Ier3","Il12b","Il17ra","Il18","Il1b","Il1rl2","Il20rb","Il23a","Il6","Il6st","Jak2","Lyn","Mefv","Metrnl","Mvk","Myd88","Ndfip1","Nfkb1","Nlrp3","Nlrx1","Nod2","Nr1d2","Osm","Pparg","Prkcd","…
GO:0008104	4	protein localization	268	1589	192.183	4.41699e-09	9.49608e-08	["Aagab","Abca1","Abca12","Abl2","Acd","Agap1","Agap3","Ahctf1","Akap6","Akr1c18","Als2cl","Amot","Ap1b1","Ap1s1","Ap1s3","Ap2a1","Ap3s1","Ap4m1","Ap5b1","Ap5s1","Ap5z1","Apba2","Apobec1","Apoe","Arrb1","Aspscr1","Atg7","Atg9b","Atp10a","Atp1b3","Atp6v0a1","Atp6v0d2","Atp6v1a","Atp6v1e1","Aup1","Bcap29","Bcl3","Blzf1","C2cd3","Cacna1a","Calcrl","Cblb","Cby1","Ccdc22","Cdan1","Chmp6","Cntnap2","Co…
GO:0044271	5	cellular nitrogen compound biosynthetic process	425	2727	329.82	4.42975e-09	9.49608e-08	["Aanat","Acot7","Adcy3","Adcy7","Adcy9","Adm","Adora2a","Adssl1","Aebp1","Aes","Aff1","Ahctf1","Ahr","Akna","Alas1","Aldh1l1","Ang","Anp32a","Aprt","Arg1","Arg2","Arhgap22","Arid1b","Arid5a","Arid5b","Arrb1","Ascc1","Ascc3","Ass1","Atf3","Atf6b","Atg7","Atmin","Atp5d","Atp5g1","Atp6v0a1","BC094916","Batf","Batf2","Baz1a","Bcas3","Bcl3","Bcl9l","Bdp1","Bend6","Bmi1","C77370","Calcoco1","Calcrl","…
GO:2001235	7	positive regulation of apoptotic signaling pathway	54	199	24.0683	6.02513e-09	1.28711e-07	["Adora2a","Atf3","Bak1","Bmf","Casp2","Cflar","Ctsc","Dedd2","Dfna5","Dnm1l","Dynll2","E2f1","Eef1e1","Fadd","Flcn","Gsn","Htra2","Hyal2","Il19","Inhba","Itm2c","Jak2","Ltbr","Maged1","Mapk8","Mllt11","Mmp9","Nacc2","Nck1","Nck2","Nox1","Osm","Pea15a","Pink1","Plagl2","Plaur","Ppp3cc","Prkcd","Psen2","Ptpn2","Rad9a","Rbck1","Rps3","S100a8","Sh3glb1","Siva1","Skil","Smad3","Steap3","Stk3","Tgfbr1…
GO:0048878	5	chemical homeostasis	171	925	111.875	6.28425e-09	1.33366e-07	["Abca1","Abca12","Abca2","Abl2","Adcy3","Adcy7","Adcy9","Adipor2","Adm","Adra1a","Angptl4","Aplp2","Apoe","Aqp9","Aspscr1","Atox1","Atp1a2","Atp1a3","Atp1b3","Atp2b2","Atp2c1","Atp6v0a1","Atp6v0d2","Atp6v1a","Atp6v1e1","B2m","Bak1","Cacna1a","Car2","Ccdc22","Ccl3","Ccl5","Ccr9","Cd38","Cd40","Cd55","Cebpa","Cftr","Ckb","Cln5","Cln6","Cnnm2","Cp","Cxcl1","Cxcr3","Cxcr4","Cyba","Cysltr1","Ddb1","E…
GO:0002694	5	regulation of leukocyte activation	96	442	53.4582	6.28654e-09	1.33366e-07	["Adam8","Adora2a","Adora2b","Ahr","Atm","Bmi1","Bst1","Casp3","Cblb","Ccl5","Cd274","Cd28","Cd300a","Cd300lb","Cd37","Cd37 (ENSMUSG00000109208)","Cd38","Cd40","Cd55","Cdkn1a","Cnr2","Coro1a","Csk","Ctla2a","D930015E06Rik","Dusp3","Ebi3","Fadd","Fcgr2b","Fes","Flot2","Gpr183","Gsn","Hps1","Icam1","Il12a","Il12b","Il13ra1","Il18","Il1b","Il1rl2","Il20rb","Il23a","Il27","Il6","Il6st","Inhba","Inpp5…
GO:0046483	4	heterocycle metabolic process	608	4115	497.694	6.5795e-09	1.38875e-07	["Aanat","Aarsd1","Abcc1","Acd","Acot7","Acp5","Adcy3","Adcy7","Adcy9","Adm","Adora2a","Adssl1","Aebp1","Aes","Aff1","Ago3","Ago4","Ahctf1","Ahcyl2","Ahr","Akna","Alas1","Aldh1l1","Aldh4a1","Ambp","Ang","Anp32a","Ap1s1","Ap5s1","Ap5z1","Apoa1bp","Apobec1","Aprt","Arhgap22","Arid1b","Arid5a","Arid5b","Arrb1","Ascc1","Ascc3","Atf3","Atf6b","Atg7","Atm","Atmin","Atp2b2","Atp5d","Atp5g1","Atp6v0a1","…
GO:0055114	4	oxidation-reduction process	189	1047	126.631	6.59151e-09	1.38875e-07	["Abcc1","Abcc4","Abcc8","Abcd1","Acaa2","Acads","Acox3","Acss1","Adcy3","Adcy7","Adcy9","Adi1","Adipor2","Agpat1","Akr1c18","Akr7a5","Aldh16a1","Aldh1a2","Aldh1l1","Aldh2","Aldh3a2","Aldh4a1","Alox5ap","Arl2","Atp5d","Atp5g1","Bckdha","Cacna1a","Cbr1","Cbr3","Ch25h","Cp","Cpt1a","Crat","Crot","Cyb5r1","Cyba","Cybb","Cyc1","Cyp1b1","Cyp27a1","Cyp2j8","D2hgdh","Decr1","Dhcr7","Dhodh","Dhrs3","Dhrs…
GO:0030203	6	glycosaminoglycan metabolic process	48	168	20.319	6.84701e-09	1.43764e-07	["Abcc5","Arsb","B3gat3","B3gnt3","B4galt1","B4galt4","B4galt6","B4gat1","Cd44","Cemip","Chst12","Chst14","Chst3","Cln6","Dsel","Ext1","Ext2","Extl3","Fuca1","Gcnt2","Gpc6","Gusb","Habp4","Has1","Hexb","Hpse","Hs6st1","Hyal1","Hyal2","Il1b","Itih4","Itih5","Kdr","Naglu","Ndst1","Ndst2","Ndst3","Pdgfrb","Pim1","Sdc4","Slc35b2","Slc9a1","St3gal1","St3gal3","St3gal4","Tgfb1","Ust","Xylt1"]
GO:0016567	9	protein ubiquitination	118	580	70.1488	7.03173e-09	1.47138e-07	["Anapc10","Anapc11","Anapc2","Ap1s1","Arrb1","Atg7","Blmh","Bmi1","Cacul1","Cblb","Cbx8","Cdk8","Cish","Cul1","Cul7","Cul9","Dcaf11","Dcaf15","Dcaf7","Ddb1","Dtx3","Enc1","Fbxl5","Fbxl6","Fbxo21","Fbxo22","Fbxo30","Fbxo6","Gan","Hectd3","Herc3","Herc6","Kctd13","Kdm2b","Klhl17","Klhl21","Klhl25","Klhl36","Lnx1","Lrrc41","Map3k1","March1","March2","March6","March8","Med21","Med24","Mib2","Naip2",…
GO:0051090	4	regulation of sequence-specific DNA binding transcription factor activity	84	371	44.871	7.50111e-09	1.56426e-07	["Adam8","Anxa3","Arid5b","Arrb1","Camk1d","Cd40","Cdk5rap3","Cflar","Cib1","Cmklr1","Ctnnbip1","Cyp1b1","Dvl2","Egln1","Eif2ak2","Gfi1","Hck","Hdac5","Hmga2","Hnf4a","Hr","Icam1","Id3","Ifrd1","Il1b","Il6","Irak2","Irak3","Jak2","Jmy","Lrp5","Map2k5","Mapk8","Mtdh","Mtpn","Myd88","Ncoa3","Nfam1","Nfkb1","Nfkb2","Nlrc3","Nlrc4","Nlrp3","Nod1","Nod2","Peli1","Pim1","Pink1","Pkhd1","Pparg","Ppp3ca"…
GO:0015031	5	protein transport	213	1215	146.95	8.58287e-09	1.78378e-07	["Aagab","Abca1","Acd","Agap1","Agap3","Ahctf1","Akap6","Akr1c18","Ap1b1","Ap1s1","Ap1s3","Ap2a1","Ap3s1","Ap4m1","Ap5b1","Ap5s1","Ap5z1","Apba2","Apobec1","Apoe","Arrb1","Aspscr1","Atg7","Atp10a","Atp6v0a1","Atp6v0d2","Atp6v1a","Atp6v1e1","Aup1","Bcap29","Bcl3","Blzf1","Calcrl","Cblb","Ccdc22","Chmp6","Coro7","Crlf2","Ctsa","Dag1","Dennd4c","Dgkd","Dusp16","Ehd1","Erp29","F2r","Fam160a2","Fau","…
GO:0006974	5	cellular response to DNA damage stimulus	134	685	82.8481	8.89932e-09	1.8433e-07	["Acd","Ap1s1","Ap5s1","Ap5z1","Ascc1","Ascc3","Atm","Atmin","Babam1","Bag6","Bak1","Batf","Bcl2a1b","Bcl3","C77370","Casp2","Casp3","Casp9","Cdk2","Cdk5rap3","Cdkn1a","Chaf1b","Chek2","Cib1","Csnk1e","Ctc1","Ddb1","Ddx1","Dgkz","Dna2","E2f1","Eef1e1","Eepd1","Eya4","Faap100","Fancg","Fbxo6","Fnip2","Foxn3","Foxo3","Foxo4","Fto","Hist3h2a","Hmga1","Hmga2","Htra2","Ier3","Ifi204","Ikbke","Ing4","I…
GO:0051707	3	response to other organism	106	507	61.3197	9.15834e-09	1.89057e-07	["Acp5","Adam17","Adamts4","Anxa3","Ap1s1","Apobec1","Atg7","Baiap2","Bak1","Batf","Batf2","Bcl3","Casp1","Ccl5","Cd37","Cd37 (ENSMUSG00000109208)","Cd40","Cotl1","Cxcl9","Cxcr4","Dclk1","Ddx1","Ddx21","Ddx60","Duox2","Eif2ak2","Eno1","Erap1","Exosc5","Fadd","Fau","Fcgr2b","Gbp3","Gbp4","Gbp7","Gpx1","Hck","Hist1h2bj","Hmga1","Hmga2","Hp","Hyal1","Hyal2","Ier3","Ifih1","Ifnar2","Iigp1","Il12a","I…
GO:0006022	5	aminoglycan metabolic process	50	180	21.7703	9.39458e-09	1.93282e-07	["Abcc5","Arsb","B3gat3","B3gnt3","B3gnt8","B4galt1","B4galt4","B4galt6","B4gat1","Cd44","Cemip","Chia1","Chst12","Chst14","Chst3","Cln6","Dsel","Ext1","Ext2","Extl3","Fuca1","Gcnt2","Gpc6","Gusb","Habp4","Has1","Hexb","Hpse","Hs6st1","Hyal1","Hyal2","Il1b","Itih4","Itih5","Kdr","Naglu","Ndst1","Ndst2","Ndst3","Pdgfrb","Pim1","Sdc4","Slc35b2","Slc9a1","St3gal1","St3gal3","St3gal4","Tgfb1","Ust","…
GO:0071902	9	positive regulation of protein serine/threonine kinase activity	70	291	35.1953	9.97428e-09	2.04523e-07	["Adam17","Adam8","Adora2b","Akap6","Arrb1","Camk1","Cd40","Cemip","Cib1","Crk","Csk","Cxcr4","Dvl2","Edn1","Egfr","Epha4","Erp29","Fgd4","Flt1","Fpr1","Fzd5","Gab1","Gadd45b","Gadd45g","Il1b","Irak2","Kitl","Lpar1","Maged1","Map2k1","Map2k5","Map3k1","Map3k11","Map3k14","Map3k3","Map3k9","Marcks","Mef2c","Nod1","Nod2","P2rx7","Pdcd10","Pdgfa","Pdgfrb","Pik3r5","Pik3r6","Pim1","Pkd1","Pkn1","Prdx…
GO:1901362	5	organic cyclic compound biosynthetic process	429	2778	335.989	1.18713e-08	2.4261e-07	["Aanat","Acaa2","Acot7","Adcy3","Adcy7","Adcy9","Adm","Adora2a","Adssl1","Aebp1","Aes","Aff1","Ahctf1","Ahr","Akna","Akr1c18","Alas1","Aldh1l1","Aldh4a1","Ang","Anp32a","Apoe","Aprt","Arhgap22","Arid1b","Arid5a","Arid5b","Arrb1","Ascc1","Ascc3","Atf3","Atf6b","Atg7","Atmin","Atp5d","Atp5g1","Atp6v0a1","BC094916","Batf","Batf2","Baz1a","Bcas3","Bcl3","Bcl9l","Bdp1","Bend6","Bmi1","C77370","Calcoc…
GO:0032675	6	regulation of interleukin-6 production	34	101	12.2156	1.22335e-08	2.49181e-07	["Adora2b","Arrb1","C5ar2","Csk","Cyba","F2r","Hyal2","Il1a","Il1b","Il1f5","Il1f9","Il1rl2","Il6","Il6ra","Inpp5d","Irak3","Myd88","Nlrc3","Nlrp10","Nlrx1","Nod1","Nod2","P2rx7","Rab7b","Tlr1","Tlr2","Tlr6","Tlr9","Tnf","Tnfsf4","Tnfsf9","Trim30a","Zc3h12a","Zcchc11"]
GO:0044419	3	interspecies interaction between organisms	138	715	86.4765	1.28165e-08	2.60192e-07	["Ambp","Ap1b1","Ap1s1","Ap1s3","Ap2a1","Apoe","Atg7","Atp6v0a1","Atp6v0d2","Atp6v1a","Atp6v1e1","B2m","Ccl3","Ccl5","Cd28","Cd55","Cd93","Cebpa","Cflar","Chmp6","Cul1","Cul7","Cxcr4","Cyba","Cybb","Dag1","Ddb1","Eif2ak2","Eif4e","F11r","Fadd","Fau","Fcgr2b","Gfi1","Gpx1","Hck","Hmga1","Hmga2","Hspa8","Hyal2","Icam1","Ifih1","Il16","Il6st","Irf3","Isg15","Itgb3","Ivns1abp","Kat2a","Kdr","Kpna3","…
GO:0070647	7	protein modification by small protein conjugation or removal	146	770	93.1286	1.59514e-08	3.22766e-07	["Anapc10","Anapc11","Anapc2","Ap1s1","Arrb1","Atg7","Babam1","Blmh","Bmi1","Cacul1","Cblb","Cbx4","Cbx8","Cdk5rap3","Cdk8","Cish","Cops2","Cul1","Cul7","Cul9","Dcaf11","Dcaf15","Dcaf7","Ddb1","Dtx3","Enc1","Fbxl5","Fbxl6","Fbxo21","Fbxo22","Fbxo30","Fbxo6","Gan","Hectd3","Herc3","Herc6","Ifih1","Josd2","Kat2a","Kctd13","Kdm2b","Klhl17","Klhl21","Klhl25","Klhl36","Lnx1","Lrrc41","Map3k1","March1"…
GO:0000122	9	negative regulation of transcription from RNA polymerase II promoter	146	773	93.4914	2.06214e-08	4.15888e-07	["Aebp1","Aes","Ahr","Arid5b","Atf3","BC094916","Bend6","Bmi1","Cbx4","Cbx6","Cbx7","Cbx8","Cc2d1a","Cc2d1b","Cebpa","Cela1","Cops2","Crebrf","Ctnnbip1","Ddx5","Dnmt1","Dnmt3a","Drap1","E2f1","Edn1","Egr1","Eno1","Erf","Etv6","Fgfr2","Flcn","Fnip2","Foxo3","Gbp4","Gfi1","Hcls1","Hdac10","Hdac5","Hes6","Hhex","Hmga2","Id3","Ifi204","Ift172","Il1b","Irf2bp1","Irf2bp2","Irf3","Irf8","Kank2","Kdm2b",…
GO:0051249	6	regulation of lymphocyte activation	84	379	45.8386	2.10867e-08	4.23162e-07	["Adam8","Adora2a","Ahr","Atm","Bmi1","Bst1","Casp3","Cblb","Ccl5","Cd274","Cd28","Cd300a","Cd38","Cd40","Cd55","Cdkn1a","Coro1a","Csk","Ctla2a","D930015E06Rik","Dusp3","Ebi3","Fadd","Fcgr2b","Flot2","Gpr183","Gsn","Hps1","Icam1","Il12a","Il12b","Il13ra1","Il18","Il1b","Il1rl2","Il20rb","Il23a","Il27","Il6","Il6st","Inhba","Inpp5d","Itgal","Lyn","Map3k14","Map3k8","Mef2c","Mertk","Myd88","Nck1","…
GO:0010563	7	negative regulation of phosphorus metabolic process	110	540	65.3109	2.11891e-08	4.23162e-07	["Adora2a","Akap6","Akt1s1","Ambp","Apoe","Arfgef3","Arrb1","Bak1","Casp3","Cd300a","Cdk5rap3","Cdkn1a","Cebpa","Chordc1","Cib1","Cish","Csk","Ctdsp1","Ctdsp2","Dag1","Deptor","Dusp1","Dusp16","Dusp2","Dusp3","Dusp7","Edn1","Egln1","Enpp1","Entpd1","Fam129a","Flcn","Gadd45b","Gadd45g","Gbp4","Gpd1l","Hhex","Hnf4a","Hyal2","Ier3","Il18","Il1b","Il6","Inhba","Inppl1","Irak3","Lif","Lrp5","Lrrk1","L…
GO:0045936	8	negative regulation of phosphate metabolic process	110	540	65.3109	2.11891e-08	4.23162e-07	["Adora2a","Akap6","Akt1s1","Ambp","Apoe","Arfgef3","Arrb1","Bak1","Casp3","Cd300a","Cdk5rap3","Cdkn1a","Cebpa","Chordc1","Cib1","Cish","Csk","Ctdsp1","Ctdsp2","Dag1","Deptor","Dusp1","Dusp16","Dusp2","Dusp3","Dusp7","Edn1","Egln1","Enpp1","Entpd1","Fam129a","Flcn","Gadd45b","Gadd45g","Gbp4","Gpd1l","Hhex","Hnf4a","Hyal2","Ier3","Il18","Il1b","Il6","Inhba","Inppl1","Irak3","Lif","Lrp5","Lrrk1","L…
GO:0032870	5	cellular response to hormone stimulus	98	465	56.24	2.17908e-08	4.33764e-07	["Acsl5","Adcy3","Adcy7","Adcy9","Ahr","Akr1c18","Alas1","Aldh2","Apobec1","Aprt","Arg1","Arg2","Ass1","Atp1a2","Atp1a3","Bcas3","Bmi1","Casp9","Cdk2","Cftr","Csk","Ctsb","Ctsl","Cyp1b1","Dennd4c","Dusp1","Edn1","Egfr","Egr1","Eln","Enpp1","Fbn1","Fn1","Fosl2","Gas2l1","Glp2r","Gnb1","Gng12","Gng2","Gng7","Got1","Hck","Hdac5","Hmbs","Hnrnpd","Hsd17b3","Igfbp7","Il18","Il6","Inhba","Itgb3","Jak2",…
GO:0030099	6	myeloid cell differentiation	51	190	22.9798	2.32708e-08	4.61726e-07	["Acp5","Batf","Batf2","Car2","Casp3","Casp9","Cd300lf","Cebpa","Cib1","Csf2","Csf3","Dnase2a","Gab3","Gfi1","Hcls1","Heph","Hhex","Inhba","Irf8","Jak2","L3mbtl3","Ldb1","Ltbr","Lyn","Mef2c","Mfsd7b","Mitf","Mmp9","Nbeal2","Nfatc1","Notch2","Parp1","Pirb","Pparg","Psen2","Ptpn2","Rbpj","Relb","Rps19","Slc25a38","Snx10","Tcea1","Tet2","Tgfb1","Tgfbr2","Tmem14c","Tnf","Tnfsf9","Zbtb16","Zfp385a","Z…
GO:0043086	5	negative regulation of catalytic activity	160	868	104.981	2.38953e-08	4.72587e-07	["Adora2a","Akt1s1","Ambp","Amot","Anapc10","Anapc11","Anapc2","Angptl4","Anxa3","Aplp2","Apoe","Arfgef3","Arg2","Arl2","Arrb1","Atm","Bcas3","Bcl2l12","Calu","Casp3","Cd300a","Cd44","Cd55","Cdk5rap3","Cdkn1a","Cebpa","Cflar","Chchd10","Chordc1","Cib1","Cish","Cln8","Cnn3","Cnr2","Col28a1","Csk","Deptor","Dgkz","Dnajb6","Dusp1","Dusp16","Dusp2","Dusp3","Dusp7","Ecm1","Egln1","F11r","Fadd","Gadd45…
GO:0043434	5	response to peptide hormone	88	405	48.9832	2.6121e-08	5.14944e-07	["Aanat","Abcc5","Abcc8","Acsl5","Adcy3","Adcy7","Adcy9","Adm","Alas1","Apobec1","Apoe","Aprt","Arg1","Ass1","Braf","Ccl5","Cd55","Cdk2","Cftr","Csk","Ctsb","Cyc1","Dag1","Dennd4c","Edn1","Egr1","Enpp1","Fads1","Fbn1","Fosl2","Gcnt1","Gja1","Glp2r","Gnb1","Gng12","Gng2","Gng7","Got1","Hadh","Hck","Hdac5","Hhex","Hp","Igfbp5","Il18","Il1b","Il6","Inppl1","Itgb3","Khk","Lrp5","Lyn","Map1b","Mgarp",…
GO:0051056	7	regulation of small GTPase mediated signal transduction	68	286	34.5906	2.64095e-08	5.18964e-07	["Abca1","Abl2","Adgrg1","Adra1a","Als2cl","Amot","Apoe","Arap2","Arfgef3","Arhgap19","Arhgap22","Arhgap24","Arhgap25","Arhgap31","Arhgap39","Arhgap9","Arhgdia","Arhgef1","Arhgef10l","Arhgef3","Arhgef6","Arhgef7","Arrb1","Crk","Depdc7","Dgkz","Dnmbp","F2r","Fbxo8","Fgd2","Fgd4","Fgd6","Flcn","Hmha1","Icmt","Inpp5b","Itsn1","Kctd13","Kitl","Lpar1","Map2k1","Notch2","Nrg1","Ophn1","Pdcd10","Pik3r2"…
GO:0031667	5	response to nutrient levels	104	505	61.0778	2.86218e-08	5.60639e-07	["Abca1","Acads","Acot2","Acp5","Acsl4","Acsl5","Adipor2","Adm","Adssl1","Alas1","Aldh1a2","Angptl4","Apoe","Arg1","Arg2","Arsa","Arsb","Ass1","Atf3","Atg2a","Atg7","Bcas3","Bckdha","Ccl5","Cd44","Cebpa","Cp","Ctsl","Cyba","Cybb","Cyp1b1","Dhodh","Dnmt1","Dnmt3a","Egfr","Egr1","Eif2ak2","Eln","Fads1","Fbxo22","Gas2l1","Glul","Gpx1","Gsn","Gsr","Gstt1","Hfe","Higd1a","Hlcs","Hmbs","Hmgcl","Hp","Hs…
GO:0018130	5	heterocycle biosynthetic process	408	2643	319.661	3.07274e-08	5.99967e-07	["Aanat","Acot7","Adcy3","Adcy7","Adcy9","Adm","Adora2a","Adssl1","Aebp1","Aes","Aff1","Ahctf1","Ahr","Akna","Alas1","Aldh1l1","Aldh4a1","Ang","Anp32a","Aprt","Arhgap22","Arid1b","Arid5a","Arid5b","Arrb1","Ascc1","Ascc3","Atf3","Atf6b","Atg7","Atmin","Atp5d","Atp5g1","Atp6v0a1","BC094916","Batf","Batf2","Baz1a","Bcas3","Bcl3","Bcl9l","Bdp1","Bend6","Bmi1","C77370","Calcoco1","Calcrl","Cbx4","Cbx6…
GO:0070665	7	positive regulation of leukocyte proliferation	38	124	14.9973	3.20309e-08	6.23433e-07	["Bmi1","Bst1","Ccl5","Cd274","Cd28","Cd38","Cd40","Cd55","Cdkn1a","Coro1a","Ebi3","Fadd","Gpr183","Il12a","Il12b","Il13ra1","Il18","Il1b","Il23a","Il6","Il6st","Itgal","Kitl","Lyn","Mef2c","Myd88","Nck1","Nck2","Nfatc2","Peli1","Pnp","Sash3","St6gal1","Syk","Tcf3","Tnfsf4","Tnfsf9","Vcam1"]
GO:0031344	5	regulation of cell projection organization	112	557	67.367	3.27949e-08	6.33899e-07	["Aatk","Abl2","Anapc2","Apoe","Arhgap24","Arhgdia","Arhgef1","Arhgef7","Arsb","Atp8b1","Baiap2","Bcas3","Braf","Brk1","Cacna1a","Camk1","Camk1d","Cdc42ep2","Cdc42ep3","Cib1","Cobl","Cpne6","Cul7","Dguok","Draxin","Enc1","Epha4","Ezr","Fat3","Fes","Fig4","Fkbp4","Fn1","Fnbp1l","Gfi1","Gorasp1","Grn","Hnf4a","Icam1","Ifrd1","Ift140","Inppl1","Itm2c","Kat2a","Kif13b","Lcn2","Lif","Limk1","Lpar1","L…
GO:0071345	6	cellular response to cytokine stimulus	62	253	30.5994	3.28367e-08	6.33899e-07	["Adamts12","Adamts7","Akap6","Apoe","Arg1","Arg2","Ass1","Bmi1","Ccl3","Ccl5","Cib1","Coro1a","Cpd","Csf2rb","Csf3","Cxcr4","Cyba","Cyp1b1","Dapk1","Edn1","Entpd1","Fn1","Gbp3","Gbp4","Gbp7","Hcls1","Hmbs","Htra2","Hyal1","Hyal2","Icam1","Ifi204","Iigp1","Il12b","Il17ra","Il18","Il3ra","Il6","Itga4","Kat2a","Lcn2","Mme","Mmp3","Mmp9","Ndufa13","Nfe2l2","Nfil3","Nfkb1","Nos2","Otub1","P2ry2","Pid…
GO:0043405	8	regulation of MAP kinase activity	71	305	36.8886	3.28788e-08	6.33899e-07	["Adam8","Adora2b","Apoe","Arrb1","Cd300a","Cd40","Crk","Csk","Cxcr4","Dusp1","Dusp16","Dusp2","Dusp3","Dusp7","Dvl2","Edn1","Egfr","Epha4","Erp29","Fgd4","Flt1","Fpr1","Fzd5","Gab1","Hyal2","Il1b","Inppl1","Irak2","Irak3","Kitl","Lpar1","Lyn","Maged1","Map2k1","Map2k5","Map3k1","Map3k11","Map3k14","Map3k3","Map3k9","Mef2c","Nod1","Nod2","P2rx7","Pdcd10","Pdcd4","Pdgfa","Pdgfrb","Pik3r5","Pik3r6"…
GO:0006508	5	proteolysis	198	1132	136.911	3.51886e-08	6.76305e-07	["Adam12","Adam15","Adam17","Adam7","Adam8","Adamts10","Adamts12","Adamts18","Adamts19","Adamts4","Adamts7","Adamtsl1","Adgb","Aebp1","Agap3","Anapc10","Anapc11","Anapc2","Ap1s1","Apeh","Arrb1","Astl","Babam1","Bace2","Bag6","Bak1","Blmh","Bmp1","C1ra","C2cd3","Cacul1","Capn1","Capn5","Casp1","Casp2","Casp3","Casp4","Casp7","Casp9","Cdk2","Cela1","Cfb","Cflar","Cln5","Cndp1","Cops2","Cpd","Ctla2a…
GO:1903036	6	positive regulation of response to wounding	44	155	18.7467	3.53449e-08	6.77186e-07	["Adam8","Adora2b","Alox5ap","Braf","Ccl24","Ccl3","Ccl5","Cd28","Cdk19","Egfr","Enpp4","F2r","F3","Fcgr3","Hpse","Hyal2","Il12b","Il17ra","Il18","Il1b","Il23a","Il6","Il6st","Jak2","Mylk","Ndel1","Nfe2l2","Nod2","Osm","Plek","Prdx2","Ptprj","Rps19","S100a8","Serpine1","Tgfbr2","Thbd","Tlr2","Tlr9","Tnf","Tnfsf4","Tnip1","Usf1","Vegfb"]
GO:0006725	4	cellular aromatic compound metabolic process	606	4145	501.322	3.63297e-08	6.93885e-07	["Aanat","Aarsd1","Abcc1","Acd","Acot7","Adcy3","Adcy7","Adcy9","Adm","Adora2a","Adssl1","Aebp1","Aes","Aff1","Ago3","Ago4","Ahctf1","Ahcyl2","Ahr","Akna","Alas1","Aldh1l1","Ambp","Ang","Anp32a","Ap1s1","Ap5s1","Ap5z1","Apoa1bp","Apobec1","Aprt","Arhgap22","Arid1b","Arid5a","Arid5b","Arrb1","Ascc1","Ascc3","Atf3","Atf6b","Atg7","Atm","Atmin","Atp2b2","Atp5d","Atp5g1","Atp6v0a1","Atp6v1a","BC09491…
GO:0007264	7	small GTPase mediated signal transduction	120	610	73.7772	3.8534e-08	7.33701e-07	["Aatk","Adgrg1","Agap1","Agap3","Ahctf1","Arap2","Arhgap19","Arhgap22","Arhgap24","Arhgap25","Arhgap31","Arhgap39","Arhgap9","Arhgdia","Arhgef1","Arhgef3","Arhgef6","Arhgef7","Arl11","Arl2","Arl4c","Arl5c","Arpc4","Baiap2","Bcar3","Braf","Brk1","Cdc42ep2","Cdc42ep3","Cdk2","Cdkn1a","Cenpo","Cftr","Cyba","Cybb","Cyfip1","Daam1","Depdc7","Diaph2","Dock10","Dock8","Dok1","Dok3","Dvl2","Fgd2","Fgd4"…
GO:0009059	5	macromolecule biosynthetic process	444	2917	352.8	3.90497e-08	7.41219e-07	["Aarsd1","Abca1","Abcc5","Abtb1","Aebp1","Aes","Aff1","Ahctf1","Ahr","Akna","Ang","Anp32a","Apobec1","Apoe","Arg1","Arhgap22","Arid1b","Arid5a","Arid5b","Arrb1","Ascc1","Ascc3","Atf3","Atf6b","Atg7","Atmin","B3gat3","B3gnt3","B3gnt8","B4galt1","B4galt4","B4galt6","B4gat1","BC094916","Batf","Batf2","Baz1a","Bcas3","Bcl3","Bcl9l","Bdp1","Bend6","Bmi1","C77370","Calcoco1","Cant1","Cbx4","Cbx6","Cbx…
GO:0006996	3	organelle organization	386	2486	300.672	4.05534e-08	7.67385e-07	["2700049A03Rik","Abca1","Abcd1","Abl2","Acaa2","Acd","Adcy3","Agap3","Agfg1","Ahctf1","Alas1","Als2cl","Amot","Anapc10","Anapc11","Anapc2","Antxr1","Ap1b1","Apoe","Arl2","Arrb1","Arsb","Ascc3","Atg101","Atg2a","Atg7","Atg9b","Atm","Atp2b2","Atp2c1","Atp6v0a1","Atp6v0d2","Atp6v1a","Atp6v1e1","Atp8b1","Bag6","Bak1","Bcas3","Blzf1","Bmi1","Brk1","Bscl2","Bsn","C2cd3","Casp3","Casp7","Cbx8","Cby1","…
GO:0032386	6	regulation of intracellular transport	116	585	70.7535	4.14842e-08	7.81933e-07	["Abca2","Acaa2","Adora2b","Akap6","Atp1a2","B3gat3","Bak1","Bambi","Bcas3","Bcl3","Bmf","Camk1","Ccdc22","Cd300a","Cdkn1a","Cemip","Cep131","Cib1","Coro1a","Crebrf","Csf3","Csk","Ctdspl2","Cxcl9","Cxcr3","Cyb5r1","Cyba","Dynll2","E2f1","Egfr","Ehd1","Erbb4","Ezr","F2r","Fam89b","Fes","Fzd5","Gbp4","Gsto1","Hcls1","Hnf4a","Htra2","Hyal2","Ier3","Il12b","Il18","Il1b","Il23a","Il6","Itgb3","Jak2","…
GO:0051050	5	positive regulation of transport	173	963	116.471	4.15773e-08	7.81933e-07	["Abca1","Abca12","Abcc8","Abl2","Acsl5","Acvr2a","Adam8","Adipor2","Adora2a","Adora2b","Akap6","Ang","Apoe","Arhgef7","Arrb1","Atg7","Atp1b3","Atp2b2","B3gat3","Bak1","Bambi","Bcas3","Bmf","Cacnb2","Cadm1","Camk1","Camk1d","Car2","Casp1","Casp4","Ccl3","Ccl5","Cd274","Cd38","Cemip","Cep131","Cftr","Chia1","Cib1","Crebrf","Csf3","Ctdspl2","Cxcl1","Cxcl9","Cxcr3","Cyb5r1","Cyba","Dnm1l","Dtnbp1","…
GO:0044272	5	sulfur compound biosynthetic process	47	172	20.8027	4.49275e-08	8.42356e-07	["Acsl4","Acsl5","Acss1","Adi1","B3gat3","B3gnt3","B4galt1","B4galt4","B4galt6","B4gat1","Bhmt","Chst12","Chst14","Chst3","Dld","Dsel","Ext1","Ext2","Extl3","Gcdh","Ggct","Got1","Gstm5","Gsto1","Gstt1","Haghl","Hpgds","Hs6st1","Hsd17b12","Mgst3","Mlycd","Mpst","Mri1","Mthfd1","Mthfd2l","Mtr","Ndst1","Ndst2","Ndst3","Pnkd","Slc35b2","St3gal1","St3gal3","St3gal4","Tecr","Ust","Xylt1"]
GO:0009057	5	macromolecule catabolic process	153	830	100.385	4.85654e-08	9.07789e-07	["Adamts12","Agap3","Ago3","Ago4","Ambp","Anapc10","Anapc11","Anapc2","Ap1s1","Apoe","Arrb1","Arsb","Atg7","Atm","Bace2","Bag6","Cacul1","Capn1","Casp3","Cd44","Cdk2","Cemip","Chek2","Chia1","Cln5","Cln6","Cln8","Cnot7","Ctsd","Cul1","Cul7","Cul9","Ddb1","Dedd2","Dennd3","Dhx34","Dna2","Dnase2a","Edem1","Eif4e","Enc1","Eri3","Exosc5","Fau","Fbxl5","Fbxo21","Fbxo22","Fbxo6","Fbxo8","Fbxw4","Foxred…
GO:0008610	5	lipid biosynthetic process	105	517	62.5292	5.18256e-08	9.65783e-07	["Acaa2","Acot7","Acsl4","Acsl5","Acss1","Adm","Agpat1","Agpat2","Agpat5","Akr1c18","Aldh1a2","Alox5ap","Ang","Apoe","Atm","B4galt6","Cdipt","Cds2","Cept1","Cers6","Cftr","Ch25h","Cln8","Cotl1","Cpne6","Csnk1g2","Cyb5r1","Cyp27a1","Dhcr7","Dhrs9","Dolpp1","Dpm2","Dpm3","Ebp","Edn1","Fads1","Fig4","Ggps1","Gk","Gpaa1","Gpd1l","Hacd4","Hexb","Hpgds","Hsd17b11","Hsd17b12","Hsd17b3","Hsd3b7","Inpp5d"…
GO:0045595	5	regulation of cell differentiation	276	1691	204.52	5.99509e-08	1.11381e-06	["2900011O08Rik","Aatk","Abca1","Abl2","Acvr1b","Acvr2a","Adam8","Adamts12","Adamts7","Adgrg1","Adm","Akap6","Anapc2","Ankar","Apoe","Arhgdia","Arhgef1","Arhgef7","Arsb","Atg7","Atraid","B4galt1","Baiap2","Bambi","Bcl9l","Bend6","Bmi1","Boc","Braf","Brinp1","Brinp3","C1qc","Cacna1a","Camk1","Camk1d","Car2","Ccl17","Ccl3","Ccl5","Cdk5rap3","Cebpa","Cela1","Cflar","Cib1","Clec2d","Cmklr1","Cobl","C…
GO:0010243	4	response to organonitrogen compound	171	956	115.625	6.75875e-08	1.2519e-06	["Aanat","Abcc3","Abcc4","Abcc5","Abcc8","Acsl5","Adcy3","Adcy7","Adcy9","Adm","Adora2a","Ahr","Akap6","Alas1","Aldh2","Apobec1","Apoe","Aprt","Aqp9","Arg1","Arg2","Ass1","Atp1a2","Bckdha","Bhmt","Braf","Casp1","Casp3","Ccl5","Cd55","Cdk2","Cdkn1a","Cebpa","Cftr","Cnr2","Col16a1","Col4a1","Crot","Csk","Ctsb","Cxcl1","Cyba","Cyc1","Cyp1b1","Dag1","Dennd4c","Dhodh","Dnmt1","Dnmt3a","Duox1","Duox2",…
GO:0019725	4	cellular homeostasis	135	715	86.4765	7.20351e-08	1.33026e-06	["Abca12","Abl2","Adm","Adra1a","Aplp2","Apoe","Aqp9","Atox1","Atp1a2","Atp1a3","Atp1b3","Atp2b2","Atp2c1","Atp6v0a1","Atp6v0d2","Atp6v1a","Atp6v1e1","Bak1","Cacna1a","Car2","Ccdc22","Ccl3","Ccl5","Ccr9","Cd38","Cd40","Cd55","Cftr","Ckb","Cln5","Cln6","Cp","Cxcl1","Cxcr3","Cxcr4","Cyba","Cysltr1","Dedd2","Dld","Dna2","Edn1","Enpp1","F2r","Fn1","Fth1","Ftl1","Gaa","Gja1","Glrx3","Glrx5","Gnb1","Gp…
GO:0051241	5	negative regulation of multicellular organismal process	187	1067	129.05	7.42023e-08	1.36617e-06	["2900011O08Rik","Aatk","Acp5","Adam17","Adamts12","Adamts18","Adamts7","Adgrb2","Adgrg1","Adm","Adora2b","Adra1a","Ahr","Amot","Angpt2","Apoe","Arg2","Arhgdia","Arhgef1","Arrb1","Atp1a2","Bcl3","C1qc","C5ar2","Calcrl","Ccl3","Cd274","Cd38","Cib1","Clec2d","Cmklr1","Col4a2","Csk","Ctdsp1","Cxcr3","D930015E06Rik","Dguok","Draxin","Ecm1","Edn1","Eif4e","Enpp1","Epha4","F2r","Fat3","Fcgr2b","Fig4","…
GO:0071495	4	cellular response to endogenous stimulus	151	822	99.4178	7.45459e-08	1.36839e-06	["Aanat","Acsl5","Acvr2a","Adamts12","Adamts7","Adcy3","Adcy7","Adcy9","Ahr","Akap6","Akr1c18","Alas1","Aldh2","Apobec1","Aprt","Aqp9","Arg1","Arg2","Ass1","Atp1a2","Atp1a3","Bcas3","Bmi1","Casp9","Ccl5","Cd44","Cdk2","Cftr","Cib1","Col16a1","Col4a1","Col4a2","Csk","Cstf2","Ctsb","Ctsl","Cyba","Cyp1b1","Dennd4c","Dnmt1","Dnmt3a","Dusp1","E2f1","Edn1","Egfr","Egr1","Ehd1","Eln","Enpp1","Fbn1","Fn1…
GO:0006643	5	membrane lipid metabolic process	45	164	19.8352	7.5402e-08	1.37978e-06	["Arsa","Arsb","B4galt4","B4galt6","Cerk","Cers6","Cln6","Cln8","Csnk1g2","Ctsa","Cyp1b1","Dpm2","Dpm3","Gla","Gltp","Gm2a","Gpaa1","Hexb","Htra2","Itgb8","Kdsr","Mppe1","Naga","Neu1","P2rx7","Pigh","Pigq","Pigs","Pigt","Pigyl","Pigz","Pla2g15","Prkd1","Psap","Serinc5","Sgpl1","Smpd1","Sphk2","Spns2","Sptlc2","Sptssb","St6galnac6","St8sia2","Tex2","Ugcg"]
GO:0051897	8	positive regulation of protein kinase B signaling	29	84	10.1595	7.56168e-08	1.37978e-06	["Adam8","Akr1c18","Ccl3","Cd28","Csf3","Egfr","F10","F3","Gcnt2","Gpx1","Hcls1","Hpse","Igfbp5","Il6","Itsn1","Mtdh","Nrg1","Osbpl8","Pdgfa","Pik3r5","Pink1","Ptprj","Src","Stk3","Tcf7l2","Tgfb1","Tgfbr1","Tnf","Vegfb"]
GO:0045944	9	positive regulation of transcription from RNA polymerase II promoter	185	1054	127.477	7.83015e-08	1.42453e-06	["Abhd14b","Acvr1b","Ahr","Akna","Ankar","Arhgef10l","Arid5a","Arrb1","Atf3","Atf6b","Batf","Bcas3","Bcl2l12","Bcl3","Bcl9l","Calcoco1","Camk1","Ccl3","Ccpg1","Cd28","Cd40","Cdk5rap3","Cdk8","Cebpa","Cela1","Cnot7","Creb3l2","Csf3","Cxcr3","Dbp","Ddx5","Deaf1","Dlx3","E2f1","Edn1","Egfr","Egr1","Elf5","Ell2","Esrrb","Etv6","Fadd","Fgfr2","Fhod1","Flcn","Fosl2","Foxj2","Foxo3","Fubp1","Fzd5","Gabp…
GO:0051726	5	regulation of cell cycle	172	965	116.713	7.91684e-08	1.43604e-06	["Adam17","Aldh4a1","Anapc10","Anapc11","Anapc2","Atm","Bak1","Brinp1","Brinp3","Casp2","Casp3","Ccnb3","Ccnyl1","Ccpg1","Cd28","Cdk15","Cdk18","Cdk19","Cdk2","Cdk20","Cdk5rap3","Cdk8","Cdkn1a","Cdt1","Cebpa","Cep131","Chek2","Chordc1","Commd5","Ctc1","Ctdsp1","Ctdsp2","Cul1","Cul7","Cul9","Ddb1","Dgkz","Dot1l","Dusp1","Dusp3","E2f1","E2f2","Edn1","Egfr","Eif4e","Eif4g2","Fgfr2","Flcn","Foxk1","F…
GO:0019438	5	aromatic compound biosynthetic process	406	2650	320.507	8.09601e-08	1.46421e-06	["Aanat","Acot7","Adcy3","Adcy7","Adcy9","Adm","Adora2a","Adssl1","Aebp1","Aes","Aff1","Ahctf1","Ahr","Akna","Alas1","Aldh1l1","Ang","Anp32a","Aprt","Arhgap22","Arid1b","Arid5a","Arid5b","Arrb1","Ascc1","Ascc3","Atf3","Atf6b","Atg7","Atmin","Atp5d","Atp5g1","Atp6v0a1","BC094916","Batf","Batf2","Baz1a","Bcas3","Bcl3","Bcl9l","Bdp1","Bend6","Bmi1","C77370","Calcoco1","Calcrl","Cbx4","Cbx6","Cbx7","…
GO:0002683	5	negative regulation of immune system process	83	384	46.4433	8.20088e-08	1.47881e-06	["Adam8","Adora2a","Ambp","Atm","C1qc","C5ar2","Casp3","Cblb","Ccl3","Cd274","Cd300a","Cd37","Cd37 (ENSMUSG00000109208)","Cd44","Cd55","Cib1","Clec2d","Cnr2","D930015E06Rik","Dusp3","Eif2ak2","Fadd","Fcgr2b","Fcrlb","Gas2l1","Gpx1","Htra1","Il12b","Il18","Il20rb","Inhba","Inpp5d","Irak3","Irf3","Kitl","Klf13","Ldb1","Lmo2","Lpxn","Lyn","Mafb","Mertk","Milr1","Ndfip1","Nlrx1","Nmi","Nod2","Notch1"…
GO:0032755	7	positive regulation of interleukin-6 production	24	62	7.49866	8.27216e-08	1.48729e-06	["Adora2b","Cyba","F2r","Hyal2","Il1a","Il1b","Il1f9","Il1rl2","Il6","Il6ra","Myd88","Nlrp10","Nod1","Nod2","P2rx7","Rab7b","Tlr1","Tlr2","Tlr6","Tlr9","Tnf","Tnfsf4","Tnfsf9","Zcchc11"]
GO:1901652	5	response to peptide	93	446	53.942	8.36813e-08	1.50015e-06	["Aanat","Abcc5","Abcc8","Acsl5","Adcy3","Adcy7","Adcy9","Adm","Alas1","Apobec1","Apoe","Aprt","Arg1","Ass1","Braf","Ccl5","Cd55","Cdk2","Cftr","Csk","Ctsb","Cyc1","Dag1","Dennd4c","Edn1","Egr1","Enpp1","Fads1","Fbn1","Fosl2","Gcnt1","Gja1","Glp2r","Gnb1","Gng12","Gng2","Gng7","Got1","Hadh","Hck","Hdac5","Hhex","Hp","Igfbp5","Il18","Il1b","Il6","Inppl1","Irf5","Itgb3","Khk","Klf11","Lrp5","Lyn","…
GO:1903829	5	positive regulation of cellular protein localization	73	324	39.1866	8.69344e-08	1.55392e-06	["Abca12","Akap6","B3gat3","Bambi","Bcas3","Bmf","Camk1","Cdk5rap3","Cemip","Cep131","Cib1","Csf3","Ctdspl2","Cyb5r1","Dynll2","E2f1","Egfr","Erbb4","Ezr","Fzd5","Gpd1l","Hcls1","Htra2","Hyal2","Il12b","Il18","Il1b","Il23a","Il6","Jak2","Kat2a","Kcnn3","Kif5b","Lif","Mapk8","Npepps","Nrg1","Parp1","Pik3r2","Pink1","Plagl2","Plk3","Ppp3ca","Ppp3cc","Psmb7","Rab29","Rbck1","Rbpms","Rcc2","Rhog","Rh…
GO:0097190	6	apoptotic signaling pathway	79	361	43.6616	9.69138e-08	1.72726e-06	["0610009O20Rik","Acvr1b","Appl1","Arhgef3","Arhgef6","Arhgef7","Atm","Bag6","Bak1","Bcl2a1b","Bcl3","Bmf","Casp2","Casp3","Casp4","Casp7","Casp9","Cd28","Cd38","Cdkn1a","Cflar","Chek2","Cib1","Cul1","Cyp1b1","Dapk1","Ddx5","Dedd2","Dynll2","E2f1","E2f2","Fadd","Fastk","Fgd2","Fgd4","Fnip2","Foxo3","Gpx1","Hip1","Htra2","Ier3","Ifi204","Ikbke","Il12a","Il18","Il1a","Il1b","Inhba","Itsn1","Jak2","…
GO:0090407	5	organophosphate biosynthetic process	95	460	55.6352	9.81888e-08	1.74491e-06	["Acot7","Acsl5","Adcy3","Adcy7","Adcy9","Adm","Adora2a","Adssl1","Agpat1","Agpat2","Agpat5","Aprt","Atm","Atp5d","Atp5g1","Atp6v0a1","Calcrl","Cdipt","Cds2","Cept1","Chchd10","Cmas","Coasy","Cpne6","Dcakd","Dguok","Dhodh","Dolpp1","Dpm2","Dpm3","Fads1","Fig4","Gch1","Gfpt2","Ggps1","Gk","Gpaa1","Gpd1l","Gucy2e","Guk1","Hexb","Inpp5d","Inppl1","Ip6k1","Lpcat2","Mocos","Mppe1","Mthfd1","Mthfd2l","…
GO:0051896	7	regulation of protein kinase B signaling	38	129	15.6021	1.02562e-07	1.81736e-06	["Adam8","Akr1c18","Ccl3","Cd28","Cib1","Csf3","Dag1","Egfr","F10","F3","Flcn","Gcnt2","Gpx1","Hcls1","Hpse","Hyal2","Igfbp5","Il6","Itsn1","Mmp3","Mtdh","Nrg1","Osbpl8","Pdgfa","Pik3r5","Pink1","Pkhd1","Ptprj","Sesn1","Src","Stk3","Tcf7l2","Tgfb1","Tgfbr1","Tnf","Tsc2","Vegfb","Xdh"]
GO:0006753	5	nucleoside phosphate metabolic process	93	448	54.1839	1.04048e-07	1.83837e-06	["Acot7","Adcy3","Adcy7","Adcy9","Adm","Adora2a","Adssl1","Apoa1bp","Aprt","Atp2b2","Atp5d","Atp5g1","Atp6v0a1","Atp6v1a","Calcrl","Cant1","Chchd10","Cmas","Cnp","Coasy","Crot","Dcakd","Dctpp1","Dguok","Dhodh","Eno1","Eno1b","Enpp1","Entpd1","Fmo2","Fut8","Galt","Gda","Gfpt2","Gmpr","Gpd1l","Gpd2","Gpx1","Gucy2e","Guk1","H6pd","Hk2","Hk3","Hspa8","Idh1","Kcnab2","Mccc2","Mgat1","Mlycd","Msh2","Mt…
GO:0031099	4	regeneration	50	193	23.3426	1.08007e-07	1.90284e-06	["Adam15","Adm","Angpt2","Anxa3","Apoe","Bak1","Calu","Cdk2","Cdkn1a","Cebpa","Cflar","Chst3","Ddr1","Erbb4","Gja1","Gpx1","Gsn","Hfe","Hmbs","Hp","Ifrd1","Igsf10","Jak2","Lcp1","Lif","Lifr","Lrp2","Map1b","Mtpn","Naca","Notch1","Notch2","Notch3","Plaur","Pparg","Prps2","Ptpn12","Ptpru","Sepn1","Serpine1","Socs3","Tgfb1","Tgfbr1","Tgfbr2","Tnc","Top1","Ucp2","Ulk1","Vwf","Ybx3"]
GO:0014070	5	response to organic cyclic compound	187	1073	129.775	1.11622e-07	1.9609e-06	["Aanat","Abca1","Abca2","Abcc3","Abcc4","Acads","Acp5","Acsl5","Adm","Adora2a","Ahr","Akap6","Akr1c18","Alas1","Aldh1a2","Aldh2","Angpt2","Anxa3","Apoe","Aqp9","Arg1","Arg2","Arhgdia","Arsa","Arsb","Ass1","Atp1a2","Atp1a3","Bak1","Bcas3","Bckdha","Bmi1","Braf","C1qb","Calu","Car2","Casp1","Casp3","Casp9","Cbr1","Ccl3","Ccl5","Cd38","Cd44","Cdk2","Cdkn1a","Cebpa","Cftr","Cpt1a","Ctsb","Ctsl","Cxc…
GO:0006520	4	cellular amino acid metabolic process	78	357	43.1778	1.24954e-07	2.18883e-06	["Aarsd1","Abhd12","Adi1","Adssl1","Ahcyl2","Aldh1l1","Aldh4a1","Arg1","Arg2","Ass1","Atg7","Bckdha","Bckdk","Bhmt","Cacna1a","Ckb","Dalrd3","Dars2","Dbt","Ddah2","Dld","Dnmt1","Dnmt3a","Dtd1","Eef1e1","Egln1","Ethe1","Folh1","Gamt","Gcdh","Gch1","Gfpt2","Glul","Got1","Gpt2","Hdc","Hibch","Hmgcl","Hnf4a","Icmt","Ivd","Lars2","Mccc2","Mpst","Mri1","Msra","Mthfd1","Mthfd1l","Mthfd2l","Mtr","Nos2","…
GO:0022610	2	biological adhesion	185	1061	128.324	1.26259e-07	2.2054e-06	["Abl2","Adam12","Adam15","Adam17","Adam8","Adamts12","Adgrg1","Ambp","Antxr1","Astl","Astn1","Atp2c1","B2m","B4galt1","Batf","Bcam","Bcl3","Boc","Braf","Cadm1","Cblb","Ccl5","Cd151","Cd164","Cd28","Cd300a","Cd33","Cd44","Cd84","Cd93","Cd99l2","Cdh12","Cdhr2","Cercam","Cib1","Cntn6","Cntnap2","Cntnap5c","Col12a1","Col16a1","Col19a1","Col28a1","Col5a3","Coro1a","Csf3r","Csrp1","Cxcr3","Cxcr4","Cyp…
GO:0022604	5	regulation of cell morphogenesis	105	526	63.6177	1.28039e-07	2.23013e-06	["Aatk","Anapc2","Apoe","Arhgdia","Arhgef1","Arhgef7","Atp10a","Baiap2","Bambi","Bcl9l","Braf","Cacna1a","Ccl24","Ccl3","Cdc42ep2","Cdc42ep3","Cib1","Coro1a","Cpne6","Csnk1a1","Csnk1e","Csnk1g2","Csnk1g3","Cul7","Cyfip1","Dag1","Draxin","Epha4","Ezr","Fblim1","Fes","Fgd2","Fgd4","Fgd6","Fmnl1","Fmnl3","Fn1","Gas7","Gcnt2","Glipr2","Gna12","Gorasp1","Hck","Hexb","Icam1","Ifrd1","Ift140","Il6","Kdr…
GO:0032946	8	positive regulation of mononuclear cell proliferation	36	120	14.5135	1.32787e-07	2.30627e-06	["Bmi1","Bst1","Ccl5","Cd274","Cd28","Cd38","Cd40","Cd55","Cdkn1a","Coro1a","Ebi3","Fadd","Gpr183","Il12a","Il12b","Il13ra1","Il18","Il1b","Il23a","Il6","Il6st","Itgal","Mef2c","Myd88","Nck1","Nck2","Nfatc2","Peli1","Pnp","Sash3","St6gal1","Syk","Tcf3","Tnfsf4","Tnfsf9","Vcam1"]
GO:1901657	4	glycosyl compound metabolic process	64	275	33.2602	1.54939e-07	2.68341e-06	["Acot7","Adssl1","Ahcyl2","Akr1c18","Akr7a5","Apobec1","Aprt","Atp5d","Atp5g1","Atp6v0a1","Atp6v1a","Bhmt","Chchd10","Coasy","Crot","Dcakd","Dguok","Dhodh","Dnmt1","Dnmt3a","Eno1","Eno1b","Enpp1","Enpp4","Fuca1","Gamt","Gla","Guk1","Hk2","Hk3","Hspa8","Icmt","Mccc2","Mlycd","Mri1","Msh2","Myh6","Myh8","Naga","Nme3","Nme4","Nos2","Nt5c1a","Osgep","Pank1","Pfkfb2","Pfkfb3","Pfkfb4","Pfkm","Pnp","P…
GO:0009636	4	response to toxic substance	54	218	26.3663	1.69484e-07	2.92706e-06	["Abtb2","Ahr","Alas1","Arg1","Arg2","Ass1","Bak1","Blmh","Casp1","Casp3","Casp9","Ccl3","Ccl5","Cdk2","Cdkn1a","Cnp","Cyp1b1","Dnmt1","Dnmt3a","Egr1","Eif2ak2","Fosl2","Gpx1","Hmbs","Hsd17b3","Htra2","Hyal1","Hyal2","Il1b","Il6","Jak2","Kdm5b","Kdm6b","Lcn2","Lyn","Map1b","Mbp","Mef2c","Mpst","Nupr1","Pdgfrb","Pdxk","Pebp1","Pink1","Rab10","Rasgrf1","Rps6kb1","Skil","Slc9a1","Tgfbr1","Tlr2","Trp…
GO:0009628	3	response to abiotic stimulus	228	1368	165.454	1.81456e-07	3.12502e-06	["Aanat","Abcc8","Abhd12","Abl2","Acaa2","Acot2","Adam17","Adam8","Adm","Adssl1","Agap3","Akt1s1","Alas1","Aldh2","Ang","Angpt2","Angptl4","Apobec1","Apoe","Aqp9","Arg2","Arhgdia","Arpp21","Arrb1","Arsa","Arsb","Atg7","Atm","Atp1a2","Atp1a3","Atp2b2","Babam1","Bak1","Bcl3","Braf","Car2","Casp1","Casp2","Casp3","Casp4","Casp7","Casp9","Cblb","Ccl5","Cd38","Cd40","Cdk2","Cdkn1a","Cds2","Chek2","Col…
GO:0051094	5	positive regulation of developmental process	210	1241	150.094	1.82284e-07	3.13048e-06	["Abl2","Acvr1b","Acvr2a","Adam8","Adgrb2","Adgrl2","Adgrl3","Adm","Akap6","Amot","Anapc2","Angpt2","Angptl4","Anxa3","Apoe","Arhgdia","Arhgef7","Arsb","Atraid","B4galt1","Baiap2","Bambi","Bcl9l","Bend6","Bmi1","Bmp1","Boc","Braf","Brinp1","Brinp3","Camk1","Camk1d","Car2","Cblb","Ccl24","Ccl3","Ccl5","Cd28","Cd40","Cebpa","Cib1","Cmklr1","Cobl","Commd5","Cpne6","Csf2","Csf3","Ctnnbip1","Cul7","Cx…
GO:0019318	6	hexose metabolic process	48	185	22.375	1.8309e-07	3.13554e-06	["Atf3","B4galt1","Cacna1a","Cpt1a","Eno1","Fuca1","Fut8","G6pc2","Gaa","Galm","Galt","Ganc","Gbe1","Gnpda1","Got1","Gpd2","Gys1","H6pd","Hk2","Hk3","Igfbp5","Inppl1","Khk","Lrp5","Man1c1","Man2a2","Man2b1","Man2b2","Man2c1","Pck2","Pdk2","Pfkfb2","Pfkfb3","Pfkfb4","Pfkm","Phka2","Pmm1","Prkacb","Pygb","Serp1","Serpina12","Slc25a10","Slc25a11","Slc25a13","Sord","Tcf7l2","Tnf","Usf1"]
GO:0051129	5	negative regulation of cellular component organization	115	595	71.963	1.93728e-07	3.30848e-06	["2900011O08Rik","Aatk","Acaa2","Acd","Anapc10","Anapc11","Anapc2","Apobec1","Apoe","Arhgap24","Arhgdia","Arhgef1","Atg7","Atm","Bcas3","Capg","Cd300a","Cflar","Cib1","Coro1a","Csk","Ctnnbip1","Dguok","Dnajb6","Dnmt1","Draxin","Eml4","Epha4","Fat3","Fcgr2b","Fgfr2","Fkbp4","Flcn","Gas2l1","Gfi1","Gorasp1","Gpx1","Gsn","H3f3a","H3f3b","Higd1a","Hmga1","Hspa8","Ier3","Ifrd1","Il1f9","Inppl1","Irak3…
GO:0030198	5	extracellular matrix organization	80	373	45.1129	1.96341e-07	3.34379e-06	["Adam15","Adam17","Adam8","Adamts4","Aplp2","B4galt1","Bcl3","Bmp1","Capg","Capn1","Casp3","Cd151","Cd44","Col11a1","Col11a2","Col12a1","Col16a1","Col19a1","Col27a1","Col28a1","Col4a1","Col4a2","Col4a5","Col5a3","Ctsb","Ctsd","Ctsl","Cyp1b1","Dag1","Ddr1","Dnajb6","Eln","Emilin1","F11r","Fbln2","Fbn1","Fbn2","Fn1","Gsn","Has1","Hsd17b12","Icam1","Itga4","Itga6","Itgal","Itgb3","Itgb5","Itgb8","K…
GO:0042493	4	response to drug	110	563	68.0927	2.02665e-07	3.44193e-06	["Abca1","Abca2","Abcc1","Abcc4","Abcc6","Abcc8","Acot2","Adam17","Add3","Adora2a","Adra1a","Adssl1","Alas1","Apobec1","Arg1","Arg2","Ass1","Atp1a3","B2m","Bak1","Bcar3","Blmh","Braf","Casp1","Casp3","Cbx7","Ccl3","Ccl5","Cd38","Cdk2","Cdkn1a","Cftr","Cpt1a","Crot","Cyba","Cybb","Dhodh","Dnmt1","Dnmt3a","Edn1","Egfr","Egr1","Eln","Erbb4","Fosl2","Fzd3","Gk","Gna12","Gstt1","Hadh","Hdac5","Hmbs","…
GO:0006139	4	nucleobase-containing compound metabolic process	571	3924	474.593	2.0395e-07	3.4542e-06	["Aarsd1","Acd","Acot7","Adcy3","Adcy7","Adcy9","Adm","Adora2a","Adssl1","Aebp1","Aes","Aff1","Ago3","Ago4","Ahctf1","Ahcyl2","Ahr","Akna","Ang","Anp32a","Ap1s1","Ap5s1","Ap5z1","Apoa1bp","Apobec1","Aprt","Arhgap22","Arid1b","Arid5a","Arid5b","Arrb1","Ascc1","Ascc3","Atf3","Atf6b","Atg7","Atm","Atmin","Atp2b2","Atp5d","Atp5g1","Atp6v0a1","Atp6v1a","BC094916","Babam1","Batf","Batf2","Baz1a","Bcas3…
GO:1903510	7	mucopolysaccharide metabolic process	37	127	15.3602	2.04794e-07	3.45893e-06	["Abcc5","Arsb","B3gat3","B3gnt3","B4galt1","B4galt4","B4galt6","B4gat1","Cd44","Cemip","Chst12","Chst14","Chst3","Dsel","Gpc6","Gusb","Habp4","Has1","Hexb","Hyal1","Hyal2","Il1b","Itih4","Itih5","Kdr","Ndst1","Ndst2","Ndst3","Pim1","Sdc4","Slc9a1","St3gal1","St3gal3","St3gal4","Tgfb1","Ust","Xylt1"]
GO:0002220	6	innate immune response activating cell surface receptor signaling pathway	35	117	14.1507	2.13098e-07	3.58929e-06	["Cul1","Il1b","Itpr3","Lyn","Map3k14","Nfatc1","Nfatc2","Nfkb1","Nfkb2","Ppp3ca","Prkacb","Prkcd","Psma2","Psma3","Psma4","Psma5","Psma6","Psmb4","Psmb7","Psmc1","Psmc2","Psmc4","Psmc6","Psmd1","Psmd10","Psmd12","Psmd5","Psmd7","Relb","Src","Syk","Tab2","Tlr2","Uba3","Ube2n"]
GO:0043062	4	extracellular structure organization	80	374	45.2339	2.20652e-07	3.70634e-06	["Adam15","Adam17","Adam8","Adamts4","Aplp2","B4galt1","Bcl3","Bmp1","Capg","Capn1","Casp3","Cd151","Cd44","Col11a1","Col11a2","Col12a1","Col16a1","Col19a1","Col27a1","Col28a1","Col4a1","Col4a2","Col4a5","Col5a3","Ctsb","Ctsd","Ctsl","Cyp1b1","Dag1","Ddr1","Dnajb6","Eln","Emilin1","F11r","Fbln2","Fbn1","Fbn2","Fn1","Gsn","Has1","Hsd17b12","Icam1","Itga4","Itga6","Itgal","Itgb3","Itgb5","Itgb8","K…
GO:1901698	4	response to nitrogen compound	180	1035	125.179	2.24774e-07	3.76528e-06	["Aanat","Abcc3","Abcc4","Abcc5","Abcc8","Acsl5","Adcy3","Adcy7","Adcy9","Adm","Adora2a","Ahr","Akap6","Alas1","Aldh2","Apobec1","Apoe","Aprt","Aqp9","Arg1","Arg2","Ass1","Atp1a2","Bckdha","Bhmt","Braf","Casp1","Casp3","Ccl5","Cd55","Cdk2","Cdkn1a","Cebpa","Cftr","Cnr2","Col16a1","Col4a1","Crot","Csk","Ctsb","Cxcl1","Cyba","Cyc1","Cyp1b1","Dag1","Ddx1","Ddx21","Dennd4c","Dhodh","Dnmt1","Dnmt3a","…
GO:0031334	6	positive regulation of protein complex assembly	43	159	19.2304	2.26681e-07	3.78313e-06	["Ahr","Arl2","Arpc4","Baiap2","Bmf","Capg","Ccl24","Cdc42ep2","Cdc42ep3","Csf2","Csf3","Fes","Gda","Gsn","Hck","Icam1","Irf8","Jmy","Lcp1","Map1b","Map3k1","Mapk8","Med25","Mitf","Mmp3","Nck1","Nck2","Piezo1","Plek","Psmc1","Psmc2","Psmc4","Psmc6","Rgs2","Sh3glb1","Snx9","Spidr","Src","Stub1","Tenm1","Tgfb1","Tnf","Vasp"]
GO:0007155	3	cell adhesion	182	1049	126.873	2.27074e-07	3.78313e-06	["Abl2","Adam12","Adam15","Adam17","Adam8","Adamts12","Adgrg1","Ambp","Antxr1","Astl","Astn1","Atp2c1","B2m","B4galt1","Batf","Bcam","Bcl3","Boc","Braf","Cadm1","Cblb","Ccl5","Cd151","Cd164","Cd28","Cd300a","Cd33","Cd44","Cd84","Cd93","Cd99l2","Cdh12","Cdhr2","Cercam","Cib1","Cntn6","Cntnap2","Cntnap5c","Col12a1","Col16a1","Col19a1","Col28a1","Col5a3","Coro1a","Csf3r","Csrp1","Cxcr3","Cxcr4","Cyp…
GO:0070372	8	regulation of ERK1 and ERK2 cascade	51	203	24.5521	2.30248e-07	3.82562e-06	["Abl2","Adra1a","Arrb1","Bmper","Braf","C5ar2","Ccl3","Cd44","Cib1","Csk","Dusp1","Dusp3","Egfr","Epha7","Erbb4","F2r","Fgfr2","Flcn","Fn1","Gcnt2","Glipr2","Gpr183","Icam1","Il1a","Il1b","Il6","Itgb3","Kdr","Lif","Lyn","Ndrg4","Nod1","Nod2","Nrp1","P2ry1","Pdgfa","Pdgfrb","Pkhd1","Ptpn2","Rap1b","Rapgef2","Rasgrp1","Scimp","Spry1","Src","Styx","Syk","Tnf","Tnip1","Trem2","Vegfb"]
GO:0098602	3	single organism cell adhesion	100	501	60.594	2.5486e-07	4.2231e-06	["Abl2","Adam15","Adam17","Adam8","Antxr1","Astn1","B2m","Batf","Bcl3","Boc","Braf","Cadm1","Cblb","Ccl5","Cd151","Cd28","Cd44","Cd93","Cercam","Col19a1","Coro1a","Csrp1","Cxcr4","Cyp1b1","Dnajb6","Dock8","Egfr","Egr1","Erf","Ezr","Fadd","Fat1","Fblim1","Fcgr4","Fibp","Fn1","Fndc3a","Fzd5","Gadd45g","Gcnt1","Hs1bp3","Icam1","Il12b","Il1b","Il23a","Il6","Itga4","Itga6","Itgal","Itgb3","Itgb5","Jmj…
GO:0050671	8	positive regulation of lymphocyte proliferation	35	118	14.2717	2.68017e-07	4.42914e-06	["Bmi1","Bst1","Ccl5","Cd274","Cd28","Cd38","Cd40","Cd55","Cdkn1a","Coro1a","Ebi3","Fadd","Gpr183","Il12a","Il12b","Il13ra1","Il18","Il1b","Il23a","Il6","Il6st","Itgal","Mef2c","Myd88","Nck1","Nck2","Nfatc2","Peli1","Pnp","Sash3","Syk","Tcf3","Tnfsf4","Tnfsf9","Vcam1"]
GO:1903530	6	regulation of secretion by cell	132	711	85.9927	2.70057e-07	4.45087e-06	["Abcc8","Abl2","Acvr2a","Adam8","Adora2a","Adora2b","Ang","Arhgef7","Arl2","Arrb1","B4galt1","Braf","C5ar2","Cacna1a","Cadm1","Casp1","Casp4","Ccl3","Ccl5","Cd274","Cd300a","Cd38","Cd40","Cftr","Chia1","Chmp6","Cpt1a","Dnajc1","Dnm1l","Dtnbp1","Edn1","Entpd1","Erp29","Ezr","F2r","Fes","Fn1","G6pc2","Gja1","Glul","Hadh","Hcar2","Hmga2","Hnf4a","Hyal2","Ica1","Il1a","Il1b","Il1f5","Il6","Il6st","I…
GO:0002223	7	stimulatory C-type lectin receptor signaling pathway	34	113	13.6669	2.71203e-07	4.45777e-06	["Cul1","Il1b","Itpr3","Lyn","Map3k14","Nfatc1","Nfatc2","Nfkb1","Nfkb2","Ppp3ca","Prkacb","Prkcd","Psma2","Psma3","Psma4","Psma5","Psma6","Psmb4","Psmb7","Psmc1","Psmc2","Psmc4","Psmc6","Psmd1","Psmd10","Psmd12","Psmd5","Psmd7","Relb","Src","Syk","Tab2","Uba3","Ube2n"]
GO:0048534	4	hematopoietic or lymphoid organ development	54	222	26.8501	3.18147e-07	5.21541e-06	["Adam17","Ahctf1","Ahr","Angpt2","Bcl3","Bmi1","Cd164","Ctc1","Ebp","Fadd","Flcn","Glrx5","Hhex","Kdr","Kitl","Klf11","Lmo2","Lrp5","Ltbr","Lyl1","Lyn","Mafb","Mfsd7b","Mknk2","Nfkb1","Nfkb2","Notch2","Pdgfrb","Pkn1","Prdx2","Psen2","Rbpj","Rogdi","Rpa1","Samd9l","Sbds","Sgpl1","Sh2b3","Six1","Six4","Spns2","Stk3","Tcf3","Tet2","Tgfb1","Tgfbr1","Tgfbr2","Tiparp","Ttc7","Txnrd2","Tyr","Zbtb16","Z…
GO:0009117	6	nucleotide metabolic process	90	440	53.2163	3.30381e-07	5.40135e-06	["Acot7","Adcy3","Adcy7","Adcy9","Adm","Adora2a","Adssl1","Apoa1bp","Aprt","Atp2b2","Atp5d","Atp5g1","Atp6v0a1","Atp6v1a","Calcrl","Chchd10","Cmas","Cnp","Coasy","Crot","Dcakd","Dguok","Dhodh","Eno1","Eno1b","Enpp1","Fmo2","Fut8","Galt","Gda","Gfpt2","Gmpr","Gpd1l","Gpd2","Gpx1","Gucy2e","Guk1","H6pd","Hk2","Hk3","Hspa8","Idh1","Kcnab2","Mccc2","Mgat1","Mlycd","Msh2","Mthfd1","Mthfd2l","Myh6","My…
GO:1900180	7	regulation of protein localization to nucleus	49	194	23.4636	3.31252e-07	5.40135e-06	["Akap6","Bambi","Bcl3","Ccdc22","Cdk5rap3","Cdkn1a","Csf3","Egfr","Erbb4","Fam89b","Flcn","Gbp4","Hcls1","Hnf4a","Hyal2","Il12b","Il18","Il1b","Il23a","Il6","Jak2","Lif","Nf2","Nfkbie","Nlrp3","Otud7b","Parp1","Pik3r2","Pkd1","Pkig","Ppp3ca","Psmd10","Rassf5","Rbck1","Rbpms","Slc9a1","Smad3","Sppl3","Sufu","Tgfb1","Tgfbr1","Tlr2","Tlr9","Tmem173","Tnf","Tonsl","Tpr","Trim8","Txn1"]
GO:0006979	4	response to oxidative stress	82	390	47.169	3.3399e-07	5.43155e-06	["Abcc1","Adprhl2","Agap3","Akr1c18","Aldh3a2","Apoe","Arg1","Atox1","Bak1","Casp3","Cbx8","Ccl5","Cd38","Cdk2","Cln8","Cyp1b1","Duox1","Duox2","Dusp1","Edn1","Egfr","Egln1","Erbb4","F3","Fn1","Foxo3","Gab1","Gpx1","Gsr","Hnrnpd","Hp","Htra2","Hyal1","Hyal2","Idh1","Il18","Il1a","Il1b","Il6","Jak2","Kdm6b","Lcn2","Map2k1","Mapk8","Mmp3","Mmp9","Msra","Msrb2","Muc5ac","Nfe2l2","Nfkb1","Nox1","Nudt…
GO:0030162	7	regulation of proteolysis	146	809	97.8455	3.65705e-07	5.93158e-06	["0610009O20Rik","Adam8","Adora2a","Ambp","Anapc10","Anapc11","Anapc2","Aplp2","Apoe","Arrb1","Astl","Atm","Atraid","Bag6","Bak1","Bcl2l12","C2cd3","Casp1","Casp2","Casp3","Casp4","Casp7","Casp9","Ccdc22","Cd44","Cd55","Cdk5rap3","Cebpa","Cfb","Cflar","Cln6","Cln8","Col28a1","Csnk1e","Ctla2a","Ctsc","Cul1","Dapk1","Dnajb6","Dnajc1","Ecm1","Epha7","F2r","F3","Fadd","Fbxo22","Fn1","Gipc1","Gna12","…
GO:0050896	2	response to stimulus	884	6393	773.209	3.75245e-07	6.07026e-06	["Aanat","Abca1","Abca2","Abcc1","Abcc3","Abcc4","Abcc5","Abcc6","Abcc8","Abhd12","Abhd2","Abl2","Abtb2","Acaa2","Acads","Acd","Acot2","Acp5","Acsl4","Acsl5","Acvr2a","Adam15","Adam17","Adam8","Adamts12","Adamts4","Adamts7","Adcy3","Adcy7","Adcy9","Add3","Adipor2","Adm","Adora2a","Adora2b","Adprhl2","Adra1a","Adssl1","Aes","Agap3","Ago3","Ago4","Ahr","Ahsa1","Akap6","Akr1c18","Akt1s1","Alas1","Al…
GO:0009612	4	response to mechanical stimulus	60	258	31.2041	3.83408e-07	6.18598e-06	["Abhd12","Angpt2","Arhgdia","Atp1a2","Atp2b2","Bak1","Casp1","Casp2","Casp4","Cd40","Col11a1","Ctsb","Cyba","Edn1","Egfr","Egr1","Eif2ak2","Entpd1","F3","Fadd","Fosl2","Gja1","Habp4","Il18","Il1b","Il6","Itgb3","Kcnj2","Kcnk2","Loxhd1","Ltbr","Map1b","Map3k1","Map3k14","Mapk8","Mmp9","Mtpn","Myd88","Nfkb1","Nos2","P2rx7","P2ry1","Piezo1","Pkd1","Pkd2l1","Pparg","Prkcd","Ptprq","Rps6kb1","Ryr2","…
GO:0045786	6	negative regulation of cell cycle	94	467	56.4819	3.90885e-07	6.29006e-06	["Anapc10","Anapc11","Anapc2","Atm","Brinp1","Brinp3","Casp2","Casp3","Cdk2","Cdk5rap3","Cdkn1a","Cebpa","Chek2","Commd5","Ctdsp1","Ctdsp2","Cul1","Dgkz","Dusp1","Egfr","Eif4g2","Fgfr2","Foxk1","Foxn3","Foxo4","Fzd3","Gas2l1","Gas7","Hhex","Hmga2","Hmgn5","Hnf4a","Htra2","Ier3","Il12a","Il12b","Ing4","Inhba","Jmy","Kank2","Lif","Mad2l1bp","Map2k1","Msh2","Nacc2","Notch2","Nupr1","Osm","Ovol1","Pd…
GO:1901342	6	regulation of vasculature development	58	247	29.8737	4.23011e-07	6.78922e-06	["Adgrb2","Adm","Adora2b","Amot","Angpt2","Angptl4","Anxa3","Ccl24","Ccl5","Cib1","Col4a2","Cxcr3","Cyp1b1","Cysltr1","Ecm1","Egln1","Egr1","Erap1","F3","Flcn","Flt1","Foxo4","Gtf2i","Hdac5","Hhex","Hyal1","Il1a","Il1b","Il6","Itgb3","Kdr","Krit1","Lif","Map2k5","Mmp9","Mtdh","Notch1","Pdcd10","Pde3b","Pdgfa","Pf4","Pik3r6","Plxnd1","Ppp1r16b","Prkd1","Rapgef2","Rnh1","Rock1","Sema4a","Serpine1",…
GO:0019221	7	cytokine-mediated signaling pathway	81	386	46.6852	4.27591e-07	6.84481e-06	["Adam17","Adipor2","B2m","Ccl5","Ccr9","Ccrl2","Cd44","Cebpa","Cib1","Cish","Cmklr1","Csf2rb","Csf3","Csf3r","Cxcl1","Cxcl9","Cxcr3","Cxcr4","Duox1","Duox2","Ebi3","Egr1","Eif4e","Eif4g2","F3","Fadd","Flnb","Gab1","Hck","Icam1","Ifi30","Ifnar2","Iigp1","Il11ra1","Il12b","Il13ra1","Il17ra","Il17rd","Il1a","Il1b","Il1f5","Il1f9","Il1rl2","Il20rb","Il3ra","Il6","Il6ra","Il6st","Irak2","Irak3","Irf3…
GO:0050663	6	cytokine secretion	15	30	3.62839	4.34145e-07	6.93162e-06	["Abca1","Lcp2","Lyn","Nlrc4","Nlrp3","Nod2","Notch1","Notch2","Optn","Pnp","Rbpj","Rnf19b","Tlr2","Trem1","Trem3"]
GO:0033673	7	negative regulation of kinase activity	55	230	27.8176	4.48372e-07	7.14018e-06	["Adora2a","Akt1s1","Apoe","Casp3","Cd300a","Cdk5rap3","Cdkn1a","Cebpa","Chordc1","Cib1","Cish","Csk","Deptor","Dusp1","Dusp16","Dusp2","Dusp3","Dusp7","Gadd45b","Gadd45g","Hhex","Hyal2","Il1b","Il6","Inppl1","Irak3","Lrp5","Lyn","Midn","Nck1","Nf2","Pdcd4","Pkib","Pkig","Pkn1","Ppp2r5a","Prkag2","Prkcd","Prkrip1","Psen2","Ptpn2","Ptprj","Ranbp2","Rgs2","Sh3bp5l","Smpd1","Snx6","Socs3","Socs6","S…
GO:0032102	6	negative regulation of response to external stimulus	60	260	31.446	5.06636e-07	8.03166e-06	["Acp5","Adamts18","Adora2a","Angpt2","Aoah","Apoe","C5ar2","Calcrl","Cnr2","Ctla2a","Edn1","Eif2ak2","Epha4","Fcgr2b","Gja1","Gpx1","Htra1","Ier3","Il12b","Il20rb","Irf3","Kank2","Mefv","Metrnl","Mvk","Ndfip1","Nfkb1","Nlrp3","Nlrx1","Nod2","Notch1","Npc1","Nrp1","Nucb2","Padi2","Pdgfa","Pink1","Plat","Plaur","Pparg","Prdm1","Prdx2","Prkcd","Psmb4","Ptpn2","Qsox1","Robo2","Rps19","Serpine1","Ser…
GO:0016337	4	single organismal cell-cell adhesion	95	476	57.5704	5.06973e-07	8.03166e-06	["Abl2","Adam15","Adam17","Adam8","Astn1","B2m","Batf","Bcl3","Boc","Braf","Cadm1","Cblb","Ccl5","Cd151","Cd28","Cd44","Cd93","Cercam","Col19a1","Coro1a","Csrp1","Cxcr4","Cyp1b1","Dnajb6","Dock8","Egfr","Egr1","Erf","Ezr","Fadd","Fat1","Fblim1","Fcgr4","Fibp","Fndc3a","Fzd5","Gadd45g","Gcnt1","Hs1bp3","Icam1","Il12b","Il1b","Il23a","Il6","Itga4","Itga6","Itgal","Itgb3","Itgb5","Jmjd6","Kif13b","K…
GO:0046907	5	intracellular transport	218	1315	159.044	5.13632e-07	8.11618e-06	["Abca1","Abcd1","Acd","Adra1a","Agap3","Agfg1","Akap6","Akr1c18","Anp32a","Ap1b1","Ap1s1","Ap1s3","Ap2a1","Ap3s1","Ap4m1","Ap5b1","Ap5s1","Ap5z1","Apoe","Arl4c","Arrb1","Arsb","Aspscr1","Atox1","Atp10a","Atp2c1","Atp5d","Atp5g1","Aup1","Bcap29","Bcl3","Blzf1","Camk1","Cblb","Ccdc22","Ccl3","Cep131","Chic2","Chmp6","Coro1a","Coro7","Cpt1a","Creb3l2","Ctsa","Dag1","Dclk1","Ddx25","Dennd3","Dtnbp1"…
GO:0030212	8	hyaluronan metabolic process	16	34	4.11217	5.15162e-07	8.11943e-06	["Abcc5","Cd44","Cemip","Gusb","Habp4","Has1","Hexb","Hyal1","Hyal2","Il1b","Itih4","Itih5","Kdr","Pim1","Slc9a1","Tgfb1"]
GO:0030888	8	regulation of B cell proliferation	23	63	7.61961	5.28932e-07	8.31508e-06	["Ahr","Atm","Bmi1","Bst1","Casp3","Cd300a","Cd38","Cd40","Cdkn1a","Fcgr2b","Gpr183","Il13ra1","Inpp5d","Lyn","Mef2c","Nfatc2","Peli1","Pkn1","Prdm1","Sash3","Tcf3","Tnfrsf13b","Tnfrsf21"]
GO:0009119	6	ribonucleoside metabolic process	56	237	28.6642	5.3595e-07	8.40387e-06	["Acot7","Adssl1","Ahcyl2","Apobec1","Aprt","Atp5d","Atp5g1","Atp6v0a1","Atp6v1a","Bhmt","Chchd10","Coasy","Crot","Dcakd","Dguok","Dhodh","Dnmt1","Dnmt3a","Eno1","Eno1b","Enpp1","Enpp4","Gamt","Guk1","Hk2","Hk3","Hspa8","Icmt","Mccc2","Mlycd","Mri1","Msh2","Myh6","Myh8","Nme3","Nme4","Nt5c1a","Osgep","Pank1","Pfkfb2","Pfkfb3","Pfkfb4","Pfkm","Pnp","Prkag2","Prps2","Pycrl","Rhoq","Slc25a13","Slc35…
GO:0002252	3	immune effector process	90	445	53.8211	5.53211e-07	8.65239e-06	["Adam17","Anxa3","Apobec1","Arpc4","Atg7","Baiap2","Batf","Bcl3","Brk1","C1qa","C1qb","C1qc","C1ra","Cadm1","Ccl3","Cd180","Cd300lb","Cd40","Cd55","Cfb","Coro1a","Crk","Crlf2","Ctsc","Cxcl9","Cyfip1","Ddx60","Eif2ak2","Elmo2","Exosc5","Fadd","Fcgr2b","Fcgr3","Gadd45g","Gbp3","Gpr183","H60b","Hck","Hyal2","Icam1","Ifih1","Il12b","Il23a","Il6","Inpp5d","Irf3","Irf5","Isg15","Itgal","Itpr3","Lat2",…
GO:1901701	5	cellular response to oxygen-containing compound	163	931	112.601	5.55028e-07	8.65871e-06	["Aanat","Abca1","Abl2","Acsl5","Adcy3","Adcy7","Adcy9","Adprhl2","Agap3","Ahr","Akap6","Akr1c18","Alas1","Aldh1a2","Aldh2","Apobec1","Apoe","Aprt","Aqp9","Arg1","Arg2","Ass1","Bmi1","Brinp1","Brinp3","Calcrl","Casp9","Cbx8","Ccl5","Cd180","Cd300lb","Cd40","Cdk19","Cdk2","Cftr","Col16a1","Col4a1","Cpt1a","Csf2","Csf3","Csk","Cyba","Cyp1b1","Dennd4c","Dnmt1","Dnmt3a","E2f1","Edn1","Egfr","Egr1","E…
GO:0002460	5	adaptive immune response based on somatic recombination of immune receptors built from immunoglobulin superfamily domains	26	77	9.31286	5.77043e-07	8.97264e-06	["Adam17","Bcl3","Cadm1","Cd55","Crlf2","Ctsc","Ebi3","Fcgr2b","Fcgr3","H60b","Il12b","Il18","Inpp5d","Klhl6","Mef2c","Msh2","Myd88","Nfkb2","Pirb","Prkcd","Relb","Sla2","Stx11","Tgfb1","Tlr6","Tnfsf13"]
GO:0072521	5	purine-containing compound metabolic process	71	327	39.5494	5.78078e-07	8.97264e-06	["Acot7","Adcy3","Adcy7","Adcy9","Adm","Adora2a","Adssl1","Ahcyl2","Aprt","Atp2b2","Atp5d","Atp5g1","Atp6v0a1","Atp6v1a","Bhmt","Calcrl","Chchd10","Coasy","Crot","Dcakd","Dguok","Dnmt1","Dnmt3a","Eno1","Eno1b","Enpp1","Enpp4","Gamt","Gda","Gmpr","Gpx1","Gucy2e","Guk1","Hk2","Hk3","Hspa8","Icmt","Il1b","Mccc2","Mlycd","Mri1","Msh2","Mthfd1","Mthfd2l","Myh6","Myh8","Nme3","Nme4","Nt5c1a","Nudt1","O…
GO:0042176	6	regulation of protein catabolic process	85	414	50.0717	5.89762e-07	9.12651e-06	["Adam8","Anapc10","Anapc11","Anapc2","Apoe","Atg7","Atm","Atraid","Bag6","Cblb","Ccdc22","Cdk5rap3","Cebpa","Chek2","Crebrf","Csnk1e","Ctsc","Cul1","Egfr","Ezr","Fbxl5","Fbxo22","Gipc1","Gja1","Gna12","Gpx1","Hfe","Hspbp1","Ier3","Il1b","Irak3","Klhl40","Mad2l1bp","N4bp1","Ndfip1","Ndufa13","Nedd4l","Nos2","Nrg1","Ophn1","Pink1","Pkd1","Plk3","Psen2","Psma2","Psma3","Psma4","Psma5","Psma6","Psmb…
GO:0034654	5	nucleobase-containing compound biosynthetic process	389	2570	310.832	5.90968e-07	9.12651e-06	["Acot7","Adcy3","Adcy7","Adcy9","Adm","Adora2a","Adssl1","Aebp1","Aes","Aff1","Ahctf1","Ahr","Akna","Ang","Anp32a","Aprt","Arhgap22","Arid1b","Arid5a","Arid5b","Arrb1","Ascc1","Ascc3","Atf3","Atf6b","Atg7","Atmin","Atp5d","Atp5g1","Atp6v0a1","BC094916","Batf","Batf2","Baz1a","Bcas3","Bcl3","Bcl9l","Bdp1","Bend6","Bmi1","C77370","Calcoco1","Calcrl","Cbx4","Cbx6","Cbx7","Cbx8","Cc2d1a","Cc2d1b","C…
GO:0001525	4	angiogenesis	62	273	33.0183	5.93697e-07	9.14561e-06	["Adam15","Adam8","Adgrg1","Adipor2","Ang","Angpt2","Angptl4","Arhgap22","Arhgap24","B4galt1","Bcas3","Calcrl","Cib1","Col4a1","Col4a2","Cxcr3","Cyp1b1","Ecm1","Erap1","Fgfr2","Flt1","Fn1","Fzd5","Gpx1","Hpse","Hs6st1","Il18","Itgb3","Jmjd6","Kdr","Krit1","Mfge8","Naa15","Notch1","Notch3","Nox1","Nrp1","Nrp2","Nus1","Pdcd10","Pde3b","Pdgfa","Pdgfrb","Pik3r6","Plxdc1","Plxnd1","Pnpla6","Prcp","Prk…
GO:0009896	6	positive regulation of catabolic process	94	472	57.0866	6.41624e-07	9.85914e-06	["1810022K09Rik","Acsl5","Adam8","Adamts7","Alpk1","Anapc10","Anapc11","Anapc2","Apoe","Atg7","Bag6","Boc","Cblb","Ccdc22","Cd93","Cdk5rap3","Cebpa","Chaf1b","Chst3","Cnot7","Cpt1a","Crebrf","Csnk1e","Ctsc","Cul1","D430041D05Rik","Eif2s1","Eva1b","Ezr","Fbxl5","Fbxo22","Gja1","Hspbp1","Ier3","Il1b","Krcc1","Larp1","Map2k1","Mtdh","Myh11","Mylk","Nanos1","Ndfip1","Ndufa13","Ndufb9","Nedd4l","Nthl1…
GO:0022617	5	extracellular matrix disassembly	34	117	14.1507	6.70541e-07	1.02688e-05	["Adam15","Adam17","Adam8","Adamts4","Bmp1","Capg","Capn1","Casp3","Cd44","Col11a1","Col11a2","Col12a1","Col16a1","Col19a1","Col4a1","Col4a2","Col4a5","Col5a3","Ctsb","Ctsd","Ctsl","Eln","Fbn1","Fbn2","Fn1","Gsn","Lama3","Lamb1","Lcp1","Mmp10","Mmp3","Mmp9","Nid1","Timp2"]
GO:0044089	5	positive regulation of cellular component biogenesis	76	359	43.4197	6.71635e-07	1.02688e-05	["Adgrb2","Adgrl2","Adgrl3","Ahr","Amot","Apoe","Arhgef10l","Arl2","Arpc4","Baiap2","Bcas3","Bmf","Braf","Brk1","Capg","Ccl24","Cdc42ep2","Cdc42ep3","Cobl","Col16a1","Csf2","Csf3","Dag1","Edn1","Fes","Fhod1","Fnbp1l","Gda","Gsn","Hck","Hyal1","Icam1","Irf8","Jmy","Kdr","Lcp1","Limk1","Map1b","Map3k1","Mapk8","Med25","Mitf","Mmp3","Mtss1","Myo3b","Nck1","Nck2","Nf2","Nr1h2","P2rx7","Piezo1","Plek"…
GO:0050730	9	regulation of peptidyl-tyrosine phosphorylation	54	227	27.4548	6.76959e-07	1.03245e-05	["Adam17","Aplp2","Ccl5","Cd300a","Cd40","Cd44","Csf2","Csf3","Dvl2","Egfr","Epha7","Erbb4","Hcls1","Hnf4a","Hyal2","Icam1","Il12a","Il12b","Il18","Il23a","Il6","Il6ra","Il6st","Itgb3","Jak2","Kitl","Lif","Lrrk1","Lyn","Nck2","Nf2","Nod2","Nrg1","Nrp1","Osm","Pdgfa","Pdgfc","Pdgfrb","Prkcd","Psen2","Ptpn2","Rap2c","Samsn1","Sh3bp5l","Snx6","Src","Srcin1","Syk","Tdgf1","Trem2","Unc119","Vegfb","Zf…
GO:0072331	7	signal transduction by p53 class mediator	37	133	16.0858	7.25648e-07	1.10396e-05	["Atm","Bag6","Batf","Bcl3","Casp2","Cdk2","Cdkn1a","Ddx5","E2f1","E2f2","Foxo3","Ifi204","Ing4","Jmy","Msh2","Nupr1","Pdk2","Psma2","Psma3","Psma4","Psma5","Psma6","Psmb4","Psmb7","Psmc1","Psmc2","Psmc4","Psmc6","Psmd1","Psmd10","Psmd12","Psmd5","Psmd7","Rfwd2","Shisa5","Sp100","Zfp385b"]
GO:0043406	9	positive regulation of MAP kinase activity	53	222	26.8501	7.59851e-07	1.15313e-05	["Adam8","Adora2b","Arrb1","Cd40","Crk","Csk","Cxcr4","Dvl2","Edn1","Egfr","Epha4","Erp29","Fgd4","Flt1","Fpr1","Fzd5","Gab1","Il1b","Irak2","Kitl","Lpar1","Maged1","Map2k1","Map2k5","Map3k1","Map3k11","Map3k14","Map3k3","Map3k9","Mef2c","Nod1","Nod2","P2rx7","Pdcd10","Pdgfa","Pdgfrb","Pik3r5","Pik3r6","Pkn1","Prdx2","Prkcd","Pxn","Rasgrp1","S1pr2","Src","Syk","Tab2","Tdgf1","Tenm1","Tgfb1","Tlr6…
GO:0032388	6	positive regulation of intracellular transport	74	348	42.0893	7.8441e-07	1.18746e-05	["Adora2b","Akap6","B3gat3","Bak1","Bambi","Bcas3","Bmf","Camk1","Cemip","Cep131","Cib1","Crebrf","Csf3","Ctdspl2","Cxcl9","Cxcr3","Cyb5r1","Dynll2","E2f1","Egfr","Ehd1","Erbb4","Ezr","F2r","Fzd5","Hcls1","Htra2","Hyal2","Il12b","Il18","Il1b","Il23a","Il6","Jak2","Kat2a","Kcnn3","Mapk8","Npepps","Nrg1","P2rx7","Parp1","Pik3r2","Pink1","Plagl2","Pld2","Plk3","Ppp3ca","Ppp3cc","Psmb7","Rab29","Rbck…
GO:0050801	6	ion homeostasis	113	598	72.3258	7.97395e-07	1.20415e-05	["Abca1","Abl2","Adm","Adra1a","Aplp2","Apoe","Atox1","Atp1a2","Atp1a3","Atp1b3","Atp2b2","Atp2c1","Atp6v0a1","Atp6v0d2","Atp6v1a","Atp6v1e1","B2m","Bak1","Cacna1a","Car2","Ccdc22","Ccl3","Ccl5","Ccr9","Cd38","Cd40","Cd55","Cftr","Ckb","Cln5","Cln6","Cnnm2","Cp","Cxcl1","Cxcr3","Cxcr4","Cysltr1","Edn1","Egfr","Enpp1","F2r","Fbxl5","Fth1","Ftl1","Gja1","Gnb1","Got1","Gtf2i","Heph","Hexb","Hfe","Hn…
GO:0006897	6	endocytosis	84	411	49.7089	8.34228e-07	1.25667e-05	["Abl2","Adm","Adora2a","Ambp","Anxa3","Ap1s1","Ap2a1","Apoe","Arhgap27","Arrb1","Calcrl","Cd300a","Cd302","Cd93","Clcn5","Col4a1","Col4a2","Coro1a","Csnk1a1","Csnk1e","Csnk1g2","Csnk1g3","Dgkd","Dnm1l","Eea1","Egfr","Ehd1","Elmo2","Enpp1","Epn1","Ezr","Fcgr2b","Fnbp1","Fnbp1l","Fth1","Grn","Hck","Hip1","Hp","Inppl1","Irf8","Itsn1","Jmjd6","Ldlrap1","Lrp1","Lrp10","Lrp2","Lrp5","Lsr","Ly75","Marc…
GO:0051098	4	regulation of binding	63	282	34.1068	8.82952e-07	1.32681e-05	["Abl2","Acd","Adam15","Aes","Aplp2","Arhgef7","Arrb1","B2m","Bak1","Bambi","Bcl3","Camk1","Csf3","Ctnnbip1","Dot1l","E2f1","Eno1","Epb41","Gtpbp4","Habp4","Hdac5","Hfe","Hmga2","Ica1","Itga4","Jak2","Kat2a","Krit1","Ldlrap1","Lfng","Lif","Mapk8","Med25","Mef2c","Mfng","Mmp9","Nfib","Nrg1","Nrp1","P2ry1","Parp1","Pkd1","Plaur","Plxnd1","Ppp3ca","Prkcd","Psen2","Rapgef2","Rock1","Ski","Smad3","Sox…
GO:0022407	6	regulation of cell-cell adhesion	78	374	45.2339	8.95094e-07	1.33853e-05	["Abl2","Adam8","Adamts18","Adora2a","Ass1","Bmi1","Casp3","Cblb","Ccl5","Cd274","Cd28","Cd300a","Cd44","Cd55","Coro1a","Csk","Ctla2a","D930015E06Rik","Dusp3","Ebi3","Epha7","Fadd","Flot2","Gcnt2","Gsn","Gtpbp4","Icam1","Il12a","Il12b","Il18","Il1b","Il1rl2","Il20rb","Il23a","Il27","Il6","Il6st","Itga4","Itga6","Itgal","Jak2","Lyn","Map2k1","Map2k5","Map3k14","Map3k8","Mink1","Myadm","Myo10","Nck…
GO:0031331	7	positive regulation of cellular catabolic process	85	418	50.5555	8.95117e-07	1.33853e-05	["1810022K09Rik","Acsl5","Adam8","Adamts7","Alpk1","Anapc10","Anapc11","Anapc2","Apoe","Atg7","Bag6","Boc","Ccdc22","Cd93","Cdk5rap3","Cebpa","Chaf1b","Chst3","Cnot7","Cpt1a","Csnk1e","Ctsc","Cul1","D430041D05Rik","Eif2s1","Eva1b","Ezr","Fbxl5","Fbxo22","Hspbp1","Il1b","Krcc1","Larp1","Map2k1","Mtdh","Myh11","Mylk","Nanos1","Ndufb9","Nthl1","P2rx7","Pafah1b2","Pink1","Plk3","Pnpo","Prkcd","Psen2"…
GO:0045765	6	regulation of angiogenesis	54	229	27.6967	9.06907e-07	1.35177e-05	["Adgrb2","Adm","Adora2b","Amot","Angpt2","Angptl4","Anxa3","Ccl24","Ccl5","Cib1","Col4a2","Cxcr3","Cyp1b1","Cysltr1","Ecm1","Egln1","Erap1","F3","Flcn","Flt1","Foxo4","Gtf2i","Hdac5","Hhex","Hyal1","Il1a","Il1b","Il6","Itgb3","Kdr","Krit1","Lif","Map2k5","Mmp9","Mtdh","Notch1","Pdcd10","Pde3b","Pf4","Pik3r6","Plxnd1","Ppp1r16b","Prkd1","Rnh1","Rock1","Sema4a","Serpine1","Sp100","Spink5","Srpx2",…
GO:0051046	6	regulation of secretion	138	767	92.7657	9.08383e-07	1.35177e-05	["Abcc8","Abl2","Acsl4","Acvr2a","Adam8","Adora2a","Adora2b","Ang","Arhgef7","Arl2","Arrb1","Atg7","B4galt1","Braf","C5ar2","Cacna1a","Cadm1","Casp1","Casp4","Ccl3","Ccl5","Cd274","Cd300a","Cd38","Cd40","Cftr","Chia1","Chmp6","Cpt1a","Cyba","Dnajc1","Dnm1l","Dtnbp1","Edn1","Entpd1","Erp29","Ezr","F2r","Fes","Fn1","G6pc2","Gja1","Glul","Hadh","Hcar2","Hmga2","Hnf4a","Hyal2","Ica1","Il1a","Il1b","I…
GO:0071375	6	cellular response to peptide hormone stimulus	50	206	24.9149	9.16584e-07	1.36067e-05	["Acsl5","Adcy3","Adcy7","Adcy9","Alas1","Apobec1","Aprt","Arg1","Ass1","Cdk2","Csk","Dennd4c","Edn1","Egr1","Enpp1","Fbn1","Glp2r","Gnb1","Gng12","Gng2","Gng7","Got1","Hck","Hdac5","Il18","Itgb3","Lyn","Map1b","Mgarp","Mtus1","Myo5a","Nfkb1","Parp1","Pde3b","Pik3r2","Pparg","Prkacb","Prkcd","Rab10","Rap1b","Rasgrf1","Rhoq","Rps6kb1","Serpine1","Slc9a1","Src","Tbc1d4","Tsc2","Ucp2","Usf1"]
GO:0034645	5	cellular macromolecule biosynthetic process	411	2748	332.36	9.81027e-07	1.45282e-05	["Aarsd1","Abca1","Abtb1","Aebp1","Aes","Aff1","Ahctf1","Ahr","Akna","Ang","Anp32a","Apobec1","Apoe","Arhgap22","Arid1b","Arid5a","Arid5b","Arrb1","Ascc1","Ascc3","Atf3","Atf6b","Atmin","B3gat3","B3gnt3","B3gnt8","B4galt1","B4gat1","BC094916","Batf","Batf2","Baz1a","Bcas3","Bcl3","Bcl9l","Bdp1","Bend6","Bmi1","C77370","Calcoco1","Cant1","Cbx4","Cbx6","Cbx7","Cbx8","Cc2d1a","Cc2d1b","Ccar1","Ccdc5…
GO:0045862	8	positive regulation of proteolysis	76	363	43.9035	1.05196e-06	1.55411e-05	["Adam8","Anapc10","Anapc11","Anapc2","Apoe","Arrb1","Astl","Bag6","Bak1","Casp1","Casp2","Casp3","Casp4","Casp7","Casp9","Ccdc22","Cdk5rap3","Cebpa","Cflar","Cln6","Csnk1e","Ctsc","Cul1","Dapk1","F2r","F3","Fadd","Fbxo22","Fn1","Gsn","Hip1","Hspbp1","Htra2","Il1b","Jak2","Mefv","Ndufa13","Nlrc4","Nlrp1b","Nlrp3","Nod1","Pink1","Plk3","Pparg","Psen2","Psma2","Psma3","Psma4","Psma5","Psma6","Psmb4…
GO:0097191	7	extrinsic apoptotic signaling pathway	33	114	13.7879	1.07131e-06	1.5789e-05	["0610009O20Rik","Acvr1b","Appl1","Bak1","Bcl2a1b","Casp2","Casp3","Casp9","Cflar","Cib1","Dapk1","Dedd2","Fadd","Foxo3","Il12a","Il18","Il1a","Il1b","Inhba","Jak2","Kitl","Lcn2","Maged1","Mknk2","Mllt11","Ndufa13","P2rx7","Siva1","Smad3","Tgfb1","Tnf","Tnfrsf1b","Tnfsf10"]
GO:0006023	5	aminoglycan biosynthetic process	31	104	12.5784	1.12354e-06	1.6519e-05	["Abcc5","B3gat3","B3gnt3","B3gnt8","B4galt1","B4galt4","B4galt6","B4gat1","Chst12","Chst14","Chst3","Dsel","Ext1","Ext2","Extl3","Gcnt2","Gpc6","Has1","Hs6st1","Hyal1","Il1b","Ndst1","Ndst2","Ndst3","Pdgfrb","Sdc4","St3gal1","St3gal3","St3gal4","Ust","Xylt1"]
GO:0007599	5	hemostasis	91	459	55.5143	1.17712e-06	1.72621e-05	["Abcc4","Adora2a","Angpt2","Arrb1","Atp1b3","Atp2b2","Calu","Cd44","Cd84","Cdk2","Crk","Csk","Dagla","Daglb","Dgkd","Dgkh","Dgkz","Dock8","Dtnbp1","Ehd1","Enpp4","Entpd1","F10","F11r","F2r","F3","Fn1","Gna12","Gnb1","Gng2","Grb7","H3f3a","Habp4","Hmg20b","Hnf4a","Hps1","Hps6","Inpp5d","Itga4","Itga6","Itgal","Itgb3","Itpr3","Jak2","Kif2a","Kif3c","Lcp2","Lyn","Maff","Mertk","Nbeal2","Nos2","P2ry…
GO:1901653	6	cellular response to peptide	53	225	27.2129	1.17971e-06	1.72621e-05	["Acsl5","Adcy3","Adcy7","Adcy9","Alas1","Apobec1","Aprt","Arg1","Ass1","Cdk2","Csk","Dennd4c","Edn1","Egr1","Enpp1","Fbn1","Glp2r","Gnb1","Gng12","Gng2","Gng7","Got1","Hck","Hdac5","Il18","Itgb3","Klf11","Lyn","Map1b","Mgarp","Mtus1","Myo5a","Nfkb1","Nod1","Nod2","Parp1","Pde3b","Pik3r2","Pparg","Prkacb","Prkcd","Rab10","Rap1b","Rasgrf1","Rhoq","Rps6kb1","Serpine1","Slc9a1","Src","Tbc1d4","Tsc2"…
GO:0019882	3	antigen processing and presentation	54	231	27.9386	1.20851e-06	1.76414e-05	["Abcb5","Actr1b","Ap1b1","Ap1s1","Ap1s3","Ap2a1","B2m","Bag6","Blmh","Ctsd","Ctsf","Ctsl","Cyba","Cybb","Dynll2","Erap1","Fcgr2b","Fcgr3","Fcgrt","Gm11127","H2-Q4","H60b","Hfe","Icam1","Ifi30","Itgb5","Kif2a","Kif3c","March1","March8","Mr1","Ncf4","Npepps","Psma2","Psma3","Psma4","Psma5","Psma6","Psmb4","Psmb7","Psmc1","Psmc2","Psmc4","Psmc6","Psmd1","Psmd10","Psmd12","Psmd5","Psmd7","Rab10","Ra…
GO:0090316	6	positive regulation of intracellular protein transport	56	243	29.3899	1.25368e-06	1.82573e-05	["Akap6","B3gat3","Bambi","Bcas3","Camk1","Cemip","Cep131","Cib1","Csf3","Ctdspl2","Cyb5r1","Egfr","Erbb4","Fzd5","Hcls1","Htra2","Hyal2","Il12b","Il18","Il1b","Il23a","Il6","Jak2","Kat2a","Kcnn3","Npepps","Nrg1","Parp1","Pik3r2","Pink1","Plagl2","Plk3","Ppp3ca","Psmb7","Rab29","Rbck1","Rbpms","Rhou","Sh3glb1","Slc9a1","Smad3","Sppl3","Stard7","Tcf7l2","Tenm1","Tgfb1","Tgfbr1","Tlr2","Tlr9","Tmem…
GO:0032868	6	response to insulin	47	191	23.1007	1.27008e-06	1.84523e-05	["Aanat","Abcc5","Abcc8","Acsl5","Adm","Alas1","Apobec1","Apoe","Aprt","Ccl5","Cdk2","Dennd4c","Egr1","Enpp1","Fads1","Gcnt1","Got1","Hadh","Hdac5","Il6","Inppl1","Khk","Lyn","Myo5a","Nr3c1","Parp1","Pde3b","Pik3r2","Pparg","Prkcd","Rab10","Rasgrf1","Rhoq","Rps6kb1","Serpine1","Slc27a1","Slc9a1","Socs3","Src","Stxbp3","Tbc1d4","Tlr2","Tnfsf10","Tsc2","Ucp2","Uprt","Usf1"]
GO:0006469	8	negative regulation of protein kinase activity	51	214	25.8825	1.28781e-06	1.86646e-05	["Adora2a","Akt1s1","Apoe","Casp3","Cd300a","Cdk5rap3","Cdkn1a","Cebpa","Chordc1","Cib1","Cish","Deptor","Dusp1","Dusp16","Dusp2","Dusp3","Dusp7","Gadd45b","Gadd45g","Hhex","Hyal2","Il1b","Il6","Inppl1","Irak3","Lrp5","Lyn","Nck1","Nf2","Pdcd4","Pkib","Pkig","Pkn1","Prkag2","Prkcd","Prkrip1","Psen2","Ptpn2","Ptprj","Rgs2","Sh3bp5l","Smpd1","Snx6","Socs3","Socs6","Spry1","Srcin1","Taf7","Tsc2","Zf…
GO:0007568	4	aging	72	340	41.1217	1.29078e-06	1.86646e-05	["Adm","Adra1a","Apoe","Arg1","Ass1","Atm","Bak1","C1qb","Casp2","Casp7","Casp9","Ccl5","Cdkn1a","Chek2","Cnp","Cp","Ctc1","Ctsc","Ctsl","Dld","Dnmt1","Dnmt3a","Edn1","Eln","F3","Fads1","Fosl2","Gpx1","Gsn","Hmga1","Hmga2","Hyal2","Icam1","Il1b","Il6","Kdr","Lrp1","Lrp2","Map2k1","Mbp","Mme","Mmp9","Mnt","Msra","Nfkb2","Nos2","Nr3c1","P2ry1","P2ry2","Pdcd4","Pebp1","Prkcd","Ptgs1","Rnpep","Rps6kb…
GO:1901565	5	organonitrogen compound catabolic process	70	328	39.6703	1.34271e-06	1.93698e-05	["Abhd12","Aldh1l1","Aldh4a1","Ambp","Apobec1","Arg1","Arg2","Arsb","Bckdha","Bckdk","Cd44","Cemip","Chia1","Dbt","Ddah2","Dld","Dtd1","Enpp4","Ethe1","Fuca1","Gcdh","Gda","Gla","Glul","Gm2a","Got1","Gpc6","Gpt2","Gpx1","Gusb","Hdc","Hexb","Hibch","Hmgcl","Hpse","Hyal1","Hyal2","Ivd","Mccc2","Mlycd","Mpst","Naga","Naglu","Nos2","Nt5c1a","Nthl1","Nudt1","Paox","Pccb","Pcyox1","Pde10a","Pde11a","Pd…
GO:1901136	5	carbohydrate derivative catabolic process	43	169	20.4399	1.37333e-06	1.9765e-05	["Abhd12","Adamts12","Amdhd2","Apobec1","Arsb","Cd44","Cemip","Chia1","Enpp4","Fbxo6","Fuca1","Galt","Gla","Gm2a","Gnpda1","Gpc6","Gpd1l","Gusb","Hexb","Hpse","Hyal1","Hyal2","Manba","Mgat1","Mlycd","Naga","Nagk","Naglu","Ngly1","Nt5c1a","Nthl1","Nudt1","Pde10a","Pde11a","Pde3b","Pde4a","Pnp","Pycrl","Renbp","Sdc4","Slc9a1","Tgfb1","Upp1"]
GO:0051493	6	regulation of cytoskeleton organization	84	416	50.3136	1.39513e-06	2.00005e-05	["2900011O08Rik","Abl2","Amot","Arhgef10l","Arl2","Arpc4","Baiap2","Bcas3","Braf","Brk1","Capg","Ccl24","Cdc42ep2","Cdc42ep3","Cep131","Chordc1","Cib1","Coro1a","Crk","Csf3","Ctsl","Cyfip1","Edn1","Eln","Eml4","F11r","Fes","Fhod1","Fkbp4","Gas2l1","Gda","Gsn","Hck","Hcls1","Icam1","Jmy","Kank2","Limk1","Lrp1","Map1b","Map3k1","Mapk8","Mef2c","Mid1ip1","Mtss1","Myadm","Myo1f","Nck1","Nck2","Nf2","…
GO:0032844	4	regulation of homeostatic process	81	397	48.0156	1.39622e-06	2.00005e-05	["Acd","Acvr1b","Acvr2a","Adam17","Adam8","Adora2a","Akap6","Arrb1","Atp1a2","Bak1","Car2","Ccl3","Ccl5","Cd38","Cd44","Cemip","Cftr","Coro1a","Csk","Cxcl9","Cxcr3","Cyba","Edn1","F2r","Fadd","Fcgr2b","Fgf12","Flcn","Foxo3","Gas2l1","Gja1","Gpd1l","Gsto1","Hcar2","Hnf4a","Il18","Il1b","Inhba","Inpp5d","Isg15","Itgb3","Kitl","Klf13","Ldb1","Lmo2","Lrp5","Ltbp3","Lyn","Mafb","Map4k4","Mcoln1","Metr…
GO:0009611	4	response to wounding	59	262	31.6879	1.47343e-06	2.10573e-05	["Abhd2","Adm","Apoe","Arg1","Arg2","B4galt1","Calu","Casp3","Cd44","Chst3","Ctsb","Dcbld2","F2r","F3","Fn1","Gpx1","Gsn","Hhex","Hpse","Id3","Il1a","Il1b","Il6","Itgb3","Jak2","Kcnk2","Lcp1","Ltc4s","Lyn","Map1b","Map2k1","Map3k1","Mmp3","Nbeal2","Nmnat3","Nos2","Notch2","Nrg1","Nrp1","Optn","P2ry1","P2ry2","Pdgfa","Pdgfrb","Pebp1","Plat","Rps6kb1","S100a8","Scarb1","Sdc4","Serpine1","Smad3","Tg…
GO:0007596	5	blood coagulation	90	455	55.0305	1.4872e-06	2.11555e-05	["Abcc4","Adora2a","Angpt2","Arrb1","Atp1b3","Atp2b2","Calu","Cd44","Cd84","Cdk2","Crk","Csk","Dagla","Daglb","Dgkd","Dgkh","Dgkz","Dock8","Dtnbp1","Ehd1","Enpp4","Entpd1","F10","F11r","F2r","F3","Fn1","Gna12","Gnb1","Gng2","Grb7","H3f3a","Habp4","Hmg20b","Hnf4a","Hps1","Hps6","Inpp5d","Itga4","Itga6","Itgal","Itgb3","Itpr3","Jak2","Kif2a","Kif3c","Lcp2","Lyn","Maff","Mertk","Nbeal2","Nos2","P2ry…
GO:0050817	4	coagulation	90	455	55.0305	1.4872e-06	2.11555e-05	["Abcc4","Adora2a","Angpt2","Arrb1","Atp1b3","Atp2b2","Calu","Cd44","Cd84","Cdk2","Crk","Csk","Dagla","Daglb","Dgkd","Dgkh","Dgkz","Dock8","Dtnbp1","Ehd1","Enpp4","Entpd1","F10","F11r","F2r","F3","Fn1","Gna12","Gnb1","Gng2","Grb7","H3f3a","Habp4","Hmg20b","Hnf4a","Hps1","Hps6","Inpp5d","Itga4","Itga6","Itgal","Itgb3","Itpr3","Jak2","Kif2a","Kif3c","Lcp2","Lyn","Maff","Mertk","Nbeal2","Nos2","P2ry…
GO:0050866	6	negative regulation of cell activation	42	164	19.8352	1.50928e-06	2.13704e-05	["Adam8","Adamts18","Adora2a","Apoe","Atm","Casp3","Cblb","Cd274","Cd300a","Cd37","Cd37 (ENSMUSG00000109208)","Cnr2","D930015E06Rik","Dusp3","Fcgr2b","Il20rb","Inhba","Inpp5d","Lyn","Mertk","Milr1","Ndfip1","Pdgfa","Peli1","Pkn1","Prdm1","Prdx2","Prkcd","Ptpn2","Samsn1","Sla2","Socs6","Sox11","Tgfb1","Thbd","Thoc1","Tnfaip8l2","Tnfrsf13b","Tnfrsf21","Tnfsf4","Zc3h12a","Zc3h12d"]
GO:1903035	6	negative regulation of response to wounding	42	164	19.8352	1.50928e-06	2.13704e-05	["Acp5","Adamts18","Adora2a","Aoah","Apoe","Calcrl","Cnr2","Ctla2a","Edn1","Epha4","Fcgr2b","Gja1","Gpx1","Ier3","Il12b","Il20rb","Mefv","Metrnl","Mvk","Ndfip1","Nfkb1","Nlrp3","Nlrx1","Nod2","Pdgfa","Plat","Plaur","Pparg","Prkcd","Psmb4","Ptpn2","Rps19","Serpine1","Serping1","Siglece","Smad3","Socs3","Thbd","Tnfaip6","Tnfaip8l2","Tnfrsf1b","Xylt1"]
GO:0030168	5	platelet activation	50	210	25.3987	1.6766e-06	2.36849e-05	["Abcc4","Arrb1","Calu","Cd40","Crk","Csk","Dagla","Daglb","Dgkd","Dgkh","Dgkz","Entpd1","F2r","Fn1","Gna12","Gnb1","Gng2","Habp4","Il6","Itgb3","Itpr3","Lcp2","Lyn","Mertk","P2ry1","Pdgfa","Pf4","Pik3c2a","Pik3r5","Pik3r6","Plek","Prkcd","Prkch","Psap","Rap1b","Rapgef4","Rasgrp1","Rhog","Scg3","Serpine1","Serping1","Src","Srgn","Stxbp3","Syk","Tgfb1","Treml1","Vcl","Vegfb","Vwf"]
GO:1902532	7	negative regulation of intracellular signal transduction	84	418	50.5555	1.70649e-06	2.40516e-05	["Abl2","Adra1a","Akt1s1","Ambp","Apoe","Arhgap24","Arrb1","Bcl2a1b","Bcl2l12","Ccdc22","Cd300a","Cd44","Cib1","Cish","Csk","Dag1","Deptor","Dgkz","Dusp1","Dusp16","Dusp2","Dusp3","Dusp7","Flcn","Gpd1l","Gpx1","Hmga2","Hnf4a","Htra2","Hyal2","Il1b","Inppl1","Irak3","Ivns1abp","Kctd13","Lif","Lyn","Mecom","Mmp3","Mmp9","Myadm","Ndufa13","Nf2","Nfe2l2","Nlrc3","Nlrp3","Nlrx1","Optn","Otud7b","P2rx7…
GO:1902582	4	single-organism intracellular transport	180	1067	129.05	1.72821e-06	2.4302e-05	["Abca1","Abcd1","Adra1a","Agap3","Akap6","Akr1c18","Ap1b1","Ap1s1","Ap1s3","Ap2a1","Ap3s1","Ap4m1","Ap5b1","Ap5s1","Ap5z1","Arl4c","Arrb1","Arsb","Atox1","Atp2c1","Atp5d","Atp5g1","Aup1","Bcap29","Bcl3","Blzf1","Cblb","Ccdc22","Ccl3","Cep131","Chic2","Chmp6","Coro1a","Coro7","Cpt1a","Creb3l2","Dag1","Dclk1","Dennd3","Dtnbp1","Dusp16","Eea1","Ehd1","Eif6","Erp29","F2r","Fam160a2","Fau","Fcgr2b","…
GO:0030029	4	actin filament-based process	77	374	45.2339	1.76036e-06	2.46974e-05	["Abl2","Amot","Antxr1","Arrb1","Atp2c1","Brk1","Cdc42ep2","Cflar","Cnn3","Coro1a","Coro2a","Csrp1","Cxcl1","Daam1","Daam2","Diaph2","Dnajb6","Dtnbp1","Eln","Epb41","Epb41l1","Epb41l4b","Ezr","F11r","Fgd2","Fgd4","Fgd6","Flnb","Flnc","Fmnl1","Fmnl3","Fnbp1l","Fscn1","Gsn","Inf2","Itgb5","Kctd13","Klhl17","Limk1","Mink1","Mob2","Mtss1","Mybpc3","Myh11","Myh6","Myh8","Myl6","Myo18a","Myo5a","Nf2","…
GO:0044262	4	cellular carbohydrate metabolic process	42	165	19.9561	1.79061e-06	2.50645e-05	["Aoah","B3gnt3","B3gnt8","B4galt1","B4gat1","Ext1","Ext2","Gaa","Ganc","Gbe1","Gdpd5","Gk","Gnptg","Got1","Gpd2","Gys1","Has1","Hk2","Hk3","Idh1","Idh2","Il6st","Impa2","Ip6k1","Khk","Manba","Nagk","Pfkfb2","Pfkfb3","Pfkfb4","Pfkm","Phka2","Pomk","Prkag2","Ptges3","Pygb","Slc2a1","Slc5a3","Sord","Stk40","Synj2","Tcf7l2"]
GO:0032970	5	regulation of actin filament-based process	65	300	36.2839	1.83747e-06	2.56617e-05	["Abl2","Akap6","Amot","Arhgef10l","Arpc4","Atp1a2","Baiap2","Bcas3","Braf","Brk1","Capg","Ccl24","Cdc42ep2","Cdc42ep3","Coro1a","Crk","Csf3","Ctsl","Cyfip1","Edn1","Eln","F11r","Fes","Fhod1","Gsn","Hck","Hcls1","Icam1","Jmy","Kank2","Kcnj2","Limk1","Lrp1","Map3k1","Mef2c","Mtss1","Myadm","Mybpc3","Myo1f","Nck1","Nck2","Nf2","Pard3","Pdgfa","Pdgfrb","Phpt1","Pik3r2","Plek","Plekhh2","Prkcd","Rhoq…
GO:0007159	5	leukocyte cell-cell adhesion	62	282	34.1068	1.89197e-06	2.63629e-05	["Abl2","Adam17","B2m","Batf","Bcl3","Braf","Cadm1","Cblb","Ccl5","Cd151","Cd28","Cd44","Cercam","Coro1a","Cxcr4","Dock8","Egr1","Ezr","Fadd","Fcgr4","Fzd5","Gadd45g","Gcnt1","Hs1bp3","Icam1","Il12b","Il1b","Il23a","Il6","Itga4","Itgal","Jmjd6","Kif13b","Lcp1","Mafb","Mpzl2","Nck1","Nck2","Nlrc3","P2rx7","Patz1","Ppp3ca","Prdx2","Psen2","Ptpn2","Relb","Rock1","S100a8","Sema4a","Sla2","Smad3","Stk…
GO:0070374	9	positive regulation of ERK1 and ERK2 cascade	37	138	16.6906	1.92416e-06	2.67507e-05	["Abl2","Adra1a","Arrb1","Bmper","Braf","C5ar2","Ccl3","Cd44","Cib1","Egfr","Erbb4","F2r","Fgfr2","Gcnt2","Glipr2","Gpr183","Icam1","Il1a","Il1b","Il6","Itgb3","Kdr","Ndrg4","Nod1","Nod2","Nrp1","P2ry1","Pdgfa","Pdgfrb","Rap1b","Rapgef2","Rasgrp1","Scimp","Src","Tnf","Trem2","Vegfb"]
GO:0001818	6	negative regulation of cytokine production	50	211	25.5196	1.94259e-06	2.69458e-05	["Acp5","Adam17","Arrb1","Bcl3","C5ar2","Cd274","Cmklr1","Csk","Fcgr2b","Fn1","Gbp4","Ifih1","Ikbke","Il12a","Il12b","Il1f5","Il20rb","Il23a","Il6","Inhba","Inpp5d","Irak3","Irf3","Isg15","Map2k5","Mefv","Ndfip1","Nfkb1","Nlrc3","Nlrp3","Nlrx1","Nmi","Nod2","Otud7b","Pparg","Rel","Relb","Srgn","Tax1bp1","Tbk1","Tgfb1","Tlr2","Tlr9","Tnf","Tnfrsf21","Tnfsf4","Trim30a","Ube2d3","Zc3h12a","Zfpm1"]
GO:0048660	6	regulation of smooth muscle cell proliferation	33	117	14.1507	2.0271e-06	2.80546e-05	["Abcc4","Ang","Calcrl","Ccl5","Ctnnbip1","Cyba","Edn1","Egfr","Fgfr2","Flt1","Igfbp5","Il12a","Il12b","Il18","Il6","Il6ra","Itgb3","Myd88","Nampt","Ndrg4","Notch3","Nox1","Npr3","Pdgfrb","Pparg","Ptgir","Ralbp1","Rbpj","Rps6kb1","S1pr1","Tcf7l2","Tgfbr2","Tnf"]
GO:0031663	7	lipopolysaccharide-mediated signaling pathway	15	33	3.99122	2.03323e-06	2.80759e-05	["Ccl3","Ccl5","Hck","Il18","Il1b","Irak2","Irf3","Lyn","Mtdh","Myd88","Scarb1","Tgfb1","Tlr2","Tnf","Trem2"]
GO:0051091	5	positive regulation of sequence-specific DNA binding transcription factor activity	54	235	28.4224	2.11289e-06	2.91104e-05	["Adam8","Anxa3","Arid5b","Camk1d","Cd40","Cflar","Cib1","Dvl2","Eif2ak2","Hdac5","Hmga2","Icam1","Ifrd1","Il1b","Il6","Irak2","Irak3","Jak2","Jmy","Lrp5","Mtdh","Mtpn","Myd88","Ncoa3","Nfam1","Nfkb1","Nfkb2","Nlrc4","Nlrp3","Nod1","Nod2","Pink1","Pparg","Ppp3ca","Prkch","Prkd1","Psma6","Rab7b","Rbck1","Rps3","S100a8","Sav1","Sp100","Stk3","Tab2","Tcf3","Tgfb1","Tlr2","Tlr9","Tnf","Tnfrsf8","Trim…
GO:0031396	9	regulation of protein ubiquitination	57	253	30.5994	2.16733e-06	2.97935e-05	["Anapc10","Anapc11","Anapc2","Arrb1","Arrdc4","Atg7","Atm","Bmi1","Ccdc22","Cd300lh","Cdk2","Cdk5rap3","Cul1","Fbxo22","Gbp4","Gtpbp4","Hfe","Hspbp1","Isg15","Klhl40","Limk1","Mad2l1bp","N4bp1","Ndfip1","Nlrc3","Nmi","Nod2","Otub1","Peli1","Pink1","Psen2","Psma2","Psma3","Psma4","Psma5","Psma6","Psmb4","Psmb7","Psmc1","Psmc2","Psmc4","Psmc6","Psmd1","Psmd10","Psmd12","Psmd5","Psmd7","Rassf5","St…
GO:0050728	7	negative regulation of inflammatory response	31	107	12.9412	2.19995e-06	3.01743e-05	["Acp5","Adora2a","Aoah","Apoe","Calcrl","Cnr2","Ctla2a","Fcgr2b","Gpx1","Ier3","Il12b","Il20rb","Mefv","Metrnl","Mvk","Ndfip1","Nfkb1","Nlrp3","Nlrx1","Nod2","Pparg","Prkcd","Psmb4","Ptpn2","Rps19","Siglece","Smad3","Socs3","Tnfaip6","Tnfaip8l2","Tnfrsf1b"]
GO:0007033	4	vacuole organization	29	97	11.7318	2.30321e-06	3.152e-05	["Abca1","Arsb","Atg101","Atg2a","Atg7","Atg9b","Cln5","Cln6","Cln8","Coro1a","Ctsd","Fam160a2","Fig4","Gaa","Gabarapl1","Hexb","Hps1","Lamtor1","Naglu","Nagpa","P2rx7","Pacs2","Tpcn2","Trp53inp1","Trp53inp2","Ulk1","Ulk2","Vps18","Wdr45"]
GO:0031348	6	negative regulation of defense response	39	150	18.1419	2.3573e-06	3.21884e-05	["Acp5","Adora2a","Aoah","Apoe","Calcrl","Clec2d","Cnr2","Ctla2a","Eif2ak2","Fcgr2b","Gpx1","Htra1","Ier3","Il12b","Il20rb","Irak3","Irf3","Mefv","Metrnl","Mvk","Ndfip1","Nfkb1","Nlrp3","Nlrx1","Nmi","Nod2","Nr1h2","Pparg","Prkcd","Psmb4","Ptpn2","Rps19","Serping1","Siglece","Smad3","Socs3","Tnfaip6","Tnfaip8l2","Tnfrsf1b"]
GO:1903320	8	regulation of protein modification by small protein conjugation or removal	60	272	32.8974	2.45739e-06	3.34806e-05	["Anapc10","Anapc11","Anapc2","Arrb1","Arrdc4","Atg7","Atm","Bmi1","Ccdc22","Cd300lh","Cdk2","Cdk5rap3","Cul1","Egr1","Fbxo22","Gbp4","Gtpbp4","Hfe","Hmg20b","Hspbp1","Isg15","Klhl40","Limk1","Mad2l1bp","N4bp1","Ndfip1","Nlrc3","Nmi","Nod2","Otub1","Peli1","Pias3","Pink1","Psen2","Psma2","Psma3","Psma4","Psma5","Psma6","Psmb4","Psmb7","Psmc1","Psmc2","Psmc4","Psmc6","Psmd1","Psmd10","Psmd12","Psm…
GO:0098771	7	inorganic ion homeostasis	107	572	69.1812	2.51802e-06	3.42306e-05	["Abl2","Adm","Adra1a","Aplp2","Apoe","Atox1","Atp1a2","Atp1a3","Atp1b3","Atp2b2","Atp2c1","Atp6v0a1","Atp6v0d2","Atp6v1a","Atp6v1e1","B2m","Bak1","Cacna1a","Car2","Ccdc22","Ccl3","Ccl5","Ccr9","Cd38","Cd40","Cd55","Cftr","Ckb","Cln5","Cln6","Cnnm2","Cp","Cxcl1","Cxcr3","Cxcr4","Cysltr1","Edn1","Egfr","Enpp1","F2r","Fbxl5","Fth1","Ftl1","Gja1","Gnb1","Gtf2i","Heph","Hexb","Hfe","Hyal2","Il1b","Il…
GO:0002521	6	leukocyte differentiation	67	315	38.098	2.53142e-06	3.43365e-05	["Abl2","Acp5","Adam17","Ahr","B2m","Batf","Batf2","Bcl3","Blnk","Braf","Car2","Cd28","Cd300lf","Cebpa","Cmtm7","Coro1a","Csf2","Csf3","Egr1","Fadd","Fzd5","Gab3","Gadd45g","Gpr183","Hdac5","Hhex","Hs1bp3","Il11ra1","Il12b","Itga4","Jmjd6","L3mbtl3","Ltbr","Lyl1","Lyn","Mafb","Mef2c","Mertk","Mitf","Mmp9","Mpzl2","Msh2","Nfam1","Nfatc1","Notch2","Parp1","Patz1","Pirb","Pou2f2","Pparg","Psen2","Pt…
GO:0051603	6	proteolysis involved in cellular protein catabolic process	86	435	52.6116	2.57608e-06	3.48652e-05	["Adamts12","Adamts7","Agap3","Anapc10","Anapc11","Anapc2","Ap1s1","Arrb1","Bag6","Cacul1","Cdk2","Ctla2a","Ctsb","Ctsc","Ctsf","Ctsl","Cul1","Cul7","Cul9","Ddb1","Edem1","Enc1","Fbxl5","Fbxo21","Fbxo22","Fbxo6","Fbxo8","Fbxw4","Foxred2","Hectd3","Isg15","Kctd13","Lnx1","Mvb12a","Mvb12b","Ndfip1","Nedd4l","Nfe2l2","Nrros","Pcyox1","Pink1","Psma2","Psma3","Psma4","Psma5","Psma6","Psmb4","Psmb7","P…
GO:0050714	7	positive regulation of protein secretion	50	213	25.7615	2.59658e-06	3.50653e-05	["Abl2","Adam8","Adora2a","Ang","Arrb1","Cadm1","Casp1","Casp4","Ccl3","Cd274","Cd38","Cftr","Chia1","Dnm1l","Ezr","F2r","Gja1","Glul","Hcar2","Hyal2","Il1a","Il6","Irf3","Jak2","Mcu","Myo18a","Nlrp10","Nlrp3","Nod2","Nr1h2","P2rx7","Pck2","Pfkfb2","Pfkm","Phpt1","Ppid","Rapgef4","Rasgrp1","Scamp5","Serp1","Sptbn1","Src","Syk","Tcf7l2","Tgfb1","Tlr2","Tnf","Tnfsf15","Tnfsf4","Trim16"]
GO:0016032	4	viral process	115	626	75.7123	2.65764e-06	3.57325e-05	["Ambp","Ap1b1","Ap1s1","Ap1s3","Ap2a1","Apoe","Atg7","B2m","Cd28","Cd93","Cebpa","Cflar","Chmp6","Cul1","Cul7","Cxcr4","Dag1","Ddb1","Eif2ak2","Eif4e","F11r","Fadd","Fau","Fcgr2b","Gfi1","Hck","Hmga1","Hspa8","Hyal2","Icam1","Ifih1","Il16","Il6st","Irf3","Isg15","Itgb3","Ivns1abp","Kat2a","Kdr","Kpna3","Ltbr","Lyn","Mfge8","Mmp9","Mvb12a","Mvb12b","Naca","Nedd4l","Nfia","Nlrx1","Nup54","Nupl1","…
GO:0044403	4	symbiosis, encompassing mutualism through parasitism	115	626	75.7123	2.65764e-06	3.57325e-05	["Ambp","Ap1b1","Ap1s1","Ap1s3","Ap2a1","Apoe","Atg7","B2m","Cd28","Cd93","Cebpa","Cflar","Chmp6","Cul1","Cul7","Cxcr4","Dag1","Ddb1","Eif2ak2","Eif4e","F11r","Fadd","Fau","Fcgr2b","Gfi1","Hck","Hmga1","Hspa8","Hyal2","Icam1","Ifih1","Il16","Il6st","Irf3","Isg15","Itgb3","Ivns1abp","Kat2a","Kdr","Kpna3","Ltbr","Lyn","Mfge8","Mmp9","Mvb12a","Mvb12b","Naca","Nedd4l","Nfia","Nlrx1","Nup54","Nupl1","…
GO:0018193	7	peptidyl-amino acid modification	146	837	101.232	2.6747e-06	3.58831e-05	["Aatk","Abi3","Abl2","Acvr1b","Alg10b","Alg11","Atm","B4galt1","B4galt4","B4galt6","Bag6","Bmi1","Cbr1","Cbx4","Cbx8","Cdk2","Cmas","Csk","Csnk1a1","Csnk1e","Csnk1g2","Csnk1g3","Csrp2bp","Ctsa","Ddr1","Dolpp1","Dot1l","Dpm2","Dpm3","Dyrk1b","Edem1","Egfr","Egln1","Eif2ak2","Epha4","Epha7","Erbb4","F10","F2r","Fes","Fgfr2","Fkbp4","Flt1","Fut8","Gfpt2","Hck","Hmbs","Hmga2","Ifih1","Ing4","Jak2","…
GO:0022607	4	cellular component assembly	290	1870	226.169	2.73944e-06	3.66714e-05	["2700049A03Rik","Abca1","Abl2","Acads","Acd","Agfg1","Ago3","Ago4","Ahctf1","Ahnak","Alox5ap","Amot","Ang","Angptl4","Ap1b1","Apoa1bp","Apoe","Arg1","Arhgef6","Arhgef7","Arl2","Arpc4","Arrb1","Atg101","Atg2a","Atg7","Atg9b","Atp6v0a1","Bag6","Bahcc1","Baiap2","Braf","Brix1","Brk1","Bsn","C2cd3","Cacna1a","Cadm1","Capg","Cby1","Cc2d2a","Ccl5","Cct2","Cct3","Cd151","Cd40","Cdan1","Cdh12","Celf2","…
GO:0006024	6	glycosaminoglycan biosynthetic process	30	103	12.4575	2.82616e-06	3.77499e-05	["Abcc5","B3gat3","B3gnt3","B4galt1","B4galt4","B4galt6","B4gat1","Chst12","Chst14","Chst3","Dsel","Ext1","Ext2","Extl3","Gcnt2","Gpc6","Has1","Hs6st1","Hyal1","Il1b","Ndst1","Ndst2","Ndst3","Pdgfrb","Sdc4","St3gal1","St3gal3","St3gal4","Ust","Xylt1"]
GO:0042832	5	defense response to protozoan	14	30	3.62839	3.03052e-06	4.03915e-05	["Batf","Batf2","Bcl3","Cd37","Cd37 (ENSMUSG00000109208)","Cd40","Gbp3","Gbp4","Gbp7","Iigp1","Il12a","Il12b","Il6","Irf8"]
GO:0034612	6	response to tumor necrosis factor	33	119	14.3926	3.04999e-06	4.05629e-05	["Adamts12","Adamts7","Ass1","Casp3","Ccl3","Ccl5","Cib1","Cyba","Cyp1b1","Edn1","Entpd1","Gch1","Hyal1","Hyal2","Icam1","Il18","Il6","Jak2","Kat2a","Lcn2","Mbp","Mmp3","Mmp9","Nfe2l2","Nos2","Pid1","Rps6kb1","Slc11a2","Tdgf1","Tnfrsf21","Vcam1","Wfdc21","Ybx3"]
GO:0005996	5	monosaccharide metabolic process	53	232	28.0595	3.14249e-06	4.17026e-05	["Atf3","B4galt1","Cacna1a","Cpt1a","Eno1","Fuca1","Fut8","G6pc2","Gaa","Galm","Galt","Ganc","Gbe1","Gnpda1","Got1","Gpd2","Gsto1","Gulo","Gys1","H6pd","Hk2","Hk3","Igfbp5","Inppl1","Khk","Lrp5","Man1c1","Man2a2","Man2b1","Man2b2","Man2c1","Pck2","Pdk2","Pfkfb2","Pfkfb3","Pfkfb4","Pfkm","Phka2","Pmm1","Prkacb","Pygb","Serp1","Serpina12","Slc25a10","Slc25a11","Slc25a13","Slc2a1","Slc2a3","Sord","T…
GO:0046824	8	positive regulation of nucleocytoplasmic transport	32	114	13.7879	3.22134e-06	4.26566e-05	["Akap6","Bambi","Camk1","Csf3","Ctdspl2","Egfr","Erbb4","Hcls1","Hyal2","Il12b","Il18","Il1b","Il23a","Il6","Jak2","Parp1","Pik3r2","Ppp3ca","Rbck1","Rbpms","Slc9a1","Smad3","Sppl3","Tcf7l2","Tgfb1","Tgfbr1","Tlr2","Tlr9","Tmem173","Tnf","Tpr","Wipf1"]
GO:0001562	4	response to protozoan	15	34	4.11217	3.2317e-06	4.27016e-05	["Batf","Batf2","Bcl3","Cd37","Cd37 (ENSMUSG00000109208)","Cd40","Gbp3","Gbp4","Gbp7","Ier3","Iigp1","Il12a","Il12b","Il6","Irf8"]
GO:1900182	6	positive regulation of protein localization to nucleus	31	109	13.1831	3.37887e-06	4.45502e-05	["Akap6","Bambi","Cdk5rap3","Csf3","Egfr","Erbb4","Hcls1","Hyal2","Il12b","Il18","Il1b","Il23a","Il6","Jak2","Lif","Parp1","Pik3r2","Ppp3ca","Rbck1","Rbpms","Slc9a1","Smad3","Sppl3","Tgfb1","Tgfbr1","Tlr2","Tlr9","Tmem173","Tnf","Tpr","Trim8"]
GO:2001236	7	regulation of extrinsic apoptotic signaling pathway	42	169	20.4399	3.47698e-06	4.57454e-05	["Acsl5","Atf3","Cflar","Csf2","Dapk1","Dedd2","Deptor","Fadd","Gpx1","Htra2","Hyal2","Icam1","Il19","Il1a","Il1b","Inhba","Itga6","Itm2c","Ltbr","Map2k5","Nrg1","Nrp1","Pea15a","Pf4","Prdx2","Psen2","Rbck1","Rffl","Rps6kb1","Scrt2","Serpine1","Sgk3","Skil","Sp100","Src","Stk3","Tcf7l2","Tgfbr1","Tnf","Tnfsf10","Tnfsf4","Trps1"]
GO:0030036	5	actin cytoskeleton organization	67	318	38.4609	3.56155e-06	4.67578e-05	["Abl2","Amot","Antxr1","Arrb1","Atp2c1","Brk1","Cdc42ep2","Cflar","Cnn3","Coro1a","Coro2a","Csrp1","Cxcl1","Daam1","Daam2","Diaph2","Dnajb6","Dtnbp1","Eln","Epb41","Epb41l1","Epb41l4b","Ezr","F11r","Fgd2","Fgd4","Fgd6","Flnb","Fmnl1","Fmnl3","Fscn1","Inf2","Itgb5","Kctd13","Klhl17","Limk1","Mink1","Mob2","Mtss1","Mybpc3","Myh11","Myh6","Myo18a","Nf2","Ophn1","Parvb","Pdcd10","Pdgfa","Pdgfrb","Pf…
GO:0046425	7	regulation of JAK-STAT cascade	29	99	11.9737	3.62695e-06	4.75146e-05	["Ccl5","Cd300a","Cd40","Cish","Csf2","Cyp1b1","Dot1l","Erbb4","F2r","Hcls1","Hmga2","Hnf4a","Il12a","Il12b","Il18","Il19","Il23a","Il6","Il6ra","Il6st","Jak2","Lif","Lyn","Nf2","Notch1","Osm","Ptpn2","Socs3","Socs6"]
GO:0048002	4	antigen processing and presentation of peptide antigen	48	204	24.673	3.80548e-06	4.97471e-05	["Abcb5","Actr1b","Ap1b1","Ap1s1","Ap1s3","Ap2a1","B2m","Bag6","Blmh","Ctsd","Ctsf","Ctsl","Cyba","Cybb","Dynll2","Erap1","Fcgr2b","Fcgr3","Gm11127","H2-Q4","H60b","Hfe","Ifi30","Itgb5","Kif2a","Kif3c","March1","March8","Mr1","Ncf4","Npepps","Psma2","Psma3","Psma4","Psma5","Psma6","Psmb4","Psmb7","Psmc1","Psmc2","Psmc4","Psmc6","Psmd1","Psmd10","Psmd12","Psmd5","Psmd7","Tpp2"]
GO:0044764	3	multi-organism cellular process	115	631	76.317	3.92179e-06	5.11585e-05	["Ambp","Ap1b1","Ap1s1","Ap1s3","Ap2a1","Apoe","Atg7","B2m","Cd28","Cd93","Cebpa","Cflar","Chmp6","Cul1","Cul7","Cxcr4","Dag1","Ddb1","Eif2ak2","Eif4e","F11r","Fadd","Fau","Fcgr2b","Gfi1","Hck","Hmga1","Hspa8","Hyal2","Icam1","Ifih1","Il16","Il6st","Irf3","Isg15","Itgb3","Ivns1abp","Kat2a","Kdr","Kpna3","Ltbr","Lyn","Mfge8","Mmp9","Mvb12a","Mvb12b","Naca","Nedd4l","Nfia","Nlrx1","Nup54","Nupl1","…
GO:0000302	5	response to reactive oxygen species	50	216	26.1244	3.9703e-06	5.15718e-05	["Adprhl2","Agap3","Akr1c18","Aldh3a2","Apoe","Arg1","Atox1","Bak1","Casp3","Cbx8","Cdk2","Cyp1b1","Dusp1","Edn1","Egln1","Erbb4","F3","Fn1","Gpx1","Gsr","Hnrnpd","Hp","Hyal1","Hyal2","Il18","Il1a","Il1b","Il6","Kdm6b","Lcn2","Mapk8","Mmp3","Muc5ac","Nfe2l2","Nox1","Parp1","Pdcd10","Pdgfrb","Pdk2","Pld2","Plk3","Ppp1r15b","Prdx2","Prdx5","Prkcd","Pxn","Serpine1","Src","Txnrd2","Ucp2"]
GO:0046128	7	purine ribonucleoside metabolic process	50	216	26.1244	3.9703e-06	5.15718e-05	["Acot7","Adssl1","Ahcyl2","Aprt","Atp5d","Atp5g1","Atp6v0a1","Atp6v1a","Bhmt","Chchd10","Coasy","Crot","Dcakd","Dguok","Dnmt1","Dnmt3a","Eno1","Eno1b","Enpp1","Enpp4","Gamt","Guk1","Hk2","Hk3","Hspa8","Icmt","Mccc2","Mlycd","Mri1","Msh2","Myh6","Myh8","Nme3","Nme4","Nt5c1a","Osgep","Pank1","Pfkfb2","Pfkfb3","Pfkfb4","Pfkm","Pnp","Prkag2","Prps2","Rhoq","Slc25a13","Slc35b2","Tgfb1","Uqcrc1","Vps9…
GO:0055082	5	cellular chemical homeostasis	109	591	71.4792	3.99521e-06	5.17857e-05	["Abl2","Adm","Adra1a","Aplp2","Apoe","Aqp9","Atox1","Atp1a2","Atp1a3","Atp1b3","Atp2b2","Atp2c1","Atp6v0a1","Atp6v0d2","Atp6v1a","Atp6v1e1","Bak1","Cacna1a","Car2","Ccdc22","Ccl3","Ccl5","Ccr9","Cd38","Cd40","Cd55","Cftr","Ckb","Cln5","Cln6","Cp","Cxcl1","Cxcr3","Cxcr4","Cyba","Cysltr1","Edn1","Enpp1","F2r","Fn1","Fth1","Ftl1","Gja1","Gnb1","Gtf2i","Heph","Hexb","Hfe","Hk2","Hk3","Icam1","Il1b",…
GO:0006163	6	purine nucleotide metabolic process	59	270	32.6555	4.06338e-06	5.25582e-05	["Acot7","Adcy3","Adcy7","Adcy9","Adm","Adora2a","Adssl1","Aprt","Atp2b2","Atp5d","Atp5g1","Atp6v0a1","Atp6v1a","Calcrl","Chchd10","Coasy","Crot","Dcakd","Dguok","Eno1","Eno1b","Enpp1","Gda","Gpx1","Gucy2e","Guk1","Hk2","Hk3","Hspa8","Mccc2","Mlycd","Msh2","Mthfd1","Mthfd2l","Myh6","Myh8","Nme3","Nme4","Nt5c1a","Nudt1","Pank1","Pde10a","Pde11a","Pde3b","Pde4a","Pfkfb2","Pfkfb3","Pfkfb4","Pfkm","P…
GO:0009116	5	nucleoside metabolic process	57	258	31.2041	4.12036e-06	5.3183e-05	["Acot7","Adssl1","Ahcyl2","Apobec1","Aprt","Atp5d","Atp5g1","Atp6v0a1","Atp6v1a","Bhmt","Chchd10","Coasy","Crot","Dcakd","Dguok","Dhodh","Dnmt1","Dnmt3a","Eno1","Eno1b","Enpp1","Enpp4","Gamt","Guk1","Hk2","Hk3","Hspa8","Icmt","Mccc2","Mlycd","Mri1","Msh2","Myh6","Myh8","Nme3","Nme4","Nt5c1a","Osgep","Pank1","Pfkfb2","Pfkfb3","Pfkfb4","Pfkm","Pnp","Prkag2","Prps2","Pycrl","Rhoq","Slc25a13","Slc35…
GO:0002224	7	toll-like receptor signaling pathway	34	126	15.2392	4.22882e-06	5.44683e-05	["Cnpy3","Ctsb","Ctsl","Dusp3","Dusp7","Fadd","Ikbke","Irak2","Irak3","Irf3","Map2k1","Map3k1","Mapk8","Mef2c","Myd88","Nfkb1","Nfkb2","Nod1","Nod2","Peli1","Peli2","Pik3r4","Tab2","Tank","Tbk1","Tlr1","Tlr13","Tlr2","Tlr6","Tlr9","Tnip1","Tnip3","Ube2d3","Ube2n"]
GO:0048646	3	anatomical structure formation involved in morphogenesis	151	879	106.312	4.34519e-06	5.58498e-05	["2700049A03Rik","Adam12","Adam15","Adam17","Adam8","Adgrg1","Adipor2","Adm","Agfg1","Ang","Angpt2","Angptl4","Arhgap22","Arhgap24","Atm","Atp8b1","B4galt1","Bcas3","Bcl3","C2cd3","Calcrl","Casp1","Casp3","Casp9","Cby1","Cc2d2a","Cd44","Cep126","Cflar","Cib1","Cobl","Col4a1","Col4a2","Csf3r","Cxcr3","Cyp1b1","Deaf1","Dnah5","Drc1","Dusp1","Dusp2","Dvl2","Dyrk1b","Ecm1","Egln1","Erap1","Ext2","Fat…
GO:0043254	5	regulation of protein complex assembly	67	320	38.7028	4.45333e-06	5.712e-05	["Ahr","Arl2","Arpc4","Baiap2","Bmf","Capg","Ccl24","Cdc42ep2","Cdc42ep3","Coro1a","Csf2","Csf3","Ctnnbip1","Dnm1l","Eif2ak2","Eln","Fblim1","Fes","Fkbp4","Gda","Gsn","Hck","Hcls1","Icam1","Irf8","Jmy","Lcp1","Map1b","Map3k1","Mapk8","Med25","Mitf","Mmp3","Myadm","Nck1","Nck2","Ncln","Piezo1","Pik3r2","Pink1","Plek","Prkcd","Psen2","Psmc1","Psmc2","Psmc4","Psmc6","Rgs2","Senp6","Sh3glb1","Snx9","…
GO:0071260	5	cellular response to mechanical stimulus	29	100	12.0946	4.52324e-06	5.7775e-05	["Arhgdia","Atp1a2","Bak1","Casp1","Casp2","Casp4","Cd40","Ctsb","Cyba","Egfr","Egr1","Fadd","Gja1","Habp4","Il18","Il1b","Itgb3","Kcnj2","Ltbr","Map3k1","Map3k14","Mapk8","Mtpn","Myd88","Nfkb1","Serpine1","Slc38a2","Slc9a1","Tnfrsf8"]
GO:1903509	5	liposaccharide metabolic process	29	100	12.0946	4.52324e-06	5.7775e-05	["Aoah","Arsa","Arsb","B4galt6","Cerk","Cln6","Ctsa","Dpm2","Dpm3","Gla","Gltp","Gm2a","Gpaa1","Hexb","Itgb8","Mppe1","Naga","Neu1","Pigh","Pigq","Pigs","Pigt","Pigyl","Pigz","Psap","Smpd1","St6galnac6","St8sia2","Ugcg"]
GO:0071219	5	cellular response to molecule of bacterial origin	50	217	26.2453	4.56136e-06	5.81408e-05	["Abca1","Arg1","Arg2","Ass1","Ccl5","Cd180","Cd300lb","Cd40","Cdk19","Csf2","Csf3","Entpd1","Fcgr2b","Fcgr4","Fn1","Fzd5","Gfi1","Hdac5","Icam1","Il12a","Il12b","Il18","Il1b","Il6","Irf3","Irf8","Jak2","Lcn2","Ltc4s","Mapk8","Mef2c","Mmp9","Nfkb1","Nlrp3","Nod2","Nos2","P2ry2","Plscr4","Serpine1","Src","Tlr1","Tlr2","Tlr6","Tlr9","Tnf","Tnfrsf1b","Tnfsf4","Tnip3","Trem2","Zc3h12a"]
GO:0001816	4	cytokine production	25	80	9.67569	4.68835e-06	5.96355e-05	["Adgrg1","Batf","Casp1","Cd55","Crlf2","Cxcr3","Heg1","Il1b","Lipa","Mr1","Nfat5","Nfatc2","Nlrp1b","Nlrp3","Nod2","Prkcd","Rasgrp1","Rel","S100a8","Tbk1","Tlr2","Tlr9","Tmem173","Tnfsf4","Zcchc11"]
GO:0051092	6	positive regulation of NF-kappaB transcription factor activity	35	132	15.9649	4.72987e-06	6.0039e-05	["Adam8","Cd40","Cflar","Cib1","Eif2ak2","Icam1","Il1b","Il6","Irak2","Irak3","Mtdh","Mtpn","Myd88","Nfkb1","Nfkb2","Nlrc4","Nlrp3","Nod1","Nod2","Prkch","Prkd1","Psma6","Rab7b","Rbck1","Rps3","S100a8","Tab2","Tgfb1","Tlr2","Tlr9","Tnf","Tnfrsf8","Trim13","Trim8","Ube2n"]
GO:0043933	4	macromolecular complex subunit organization	327	2158	261.002	4.86667e-06	6.16478e-05	["0610010K14Rik","Abca1","Abl2","Acads","Agfg1","Ago3","Ago4","Ahctf1","Ahnak","Alox5ap","Ang","Angptl4","Ap1b1","Apoa1bp","Apoe","Arg1","Arid1b","Arid5b","Arl2","Arpc4","Arrb1","Atm","Atp6v0a1","Babam1","Bag6","Bahcc1","Baiap2","Baz1a","Bmi1","Braf","Brix1","Brk1","C130026I21Rik","Capg","Casp4","Cbx4","Cbx6","Cbx7","Cbx8","Ccl5","Cct2","Cct3","Cd40","Cdan1","Cdc42ep2","Cdk2","Celf2","Cenpo","Cep…
GO:0050869	8	negative regulation of B cell activation	15	35	4.23312	5.02367e-06	6.35054e-05	["Atm","Casp3","Cd300a","Fcgr2b","Inhba","Inpp5d","Lyn","Ndfip1","Pkn1","Prdm1","Samsn1","Sla2","Thoc1","Tnfrsf13b","Tnfrsf21"]
GO:0043603	5	cellular amide metabolic process	59	272	32.8974	5.18215e-06	6.53741e-05	["Aanat","Aldh1l1","Apeh","Arg1","Arg2","Ass1","Bace2","Cebpa","Cerk","Cers6","Cln5","Cln6","Cln8","Coasy","Dld","Dnpep","Ethe1","Folh1","Gch1","Ggct","Gla","Gm2a","Gpx1","Gsr","Gstm5","Gstt1","Gstt3","Haghl","Hexb","Hlcs","Htra2","Idh1","Itgb8","Mccc2","Mme","Mthfd1","Mthfd1l","Mthfd2l","Mtr","Naga","Nampt","P2rx7","Pank1","Pccb","Pcsk5","Pla2g15","Pnkd","Psen2","Sgpl1","Shmt2","Slc19a1","Slc46a…
GO:0033157	7	regulation of intracellular protein transport	74	366	44.2663	5.50096e-06	6.91115e-05	["Akap6","B3gat3","Bambi","Bcas3","Bcl3","Camk1","Ccdc22","Cdkn1a","Cemip","Cep131","Cib1","Csf3","Csk","Ctdspl2","Cyb5r1","Egfr","Erbb4","Fam89b","Fzd5","Gbp4","Hcls1","Hnf4a","Htra2","Hyal2","Il12b","Il18","Il1b","Il23a","Il6","Jak2","Kat2a","Kcnn3","Lcp1","Ndel1","Nfkbie","Nlrp3","Npepps","Nrg1","Parp1","Pik3r2","Pink1","Pkd1","Pkig","Plagl2","Plk3","Ppp3ca","Psmb7","Psmd10","Rab29","Rbck1","R…
GO:0046649	4	lymphocyte activation	74	366	44.2663	5.50096e-06	6.91115e-05	["Abl2","Adam17","Ahr","B2m","Batf","Bcl3","Blnk","Braf","Cadm1","Cblb","Cd151","Cd180","Cd28","Cd40","Cmtm7","Coro1a","Cxcr4","Dock8","Egr1","Fadd","Fcgr4","Fzd5","Gadd45g","Gpr183","Hdac5","Hhex","Hs1bp3","Icam1","Il11ra1","Il12b","Il18","Il23a","Il6","Itga4","Itgal","Jmjd6","Kif13b","Lat2","Lcp1","Lyl1","Mafb","Mef2c","Mertk","Mpzl2","Msh2","Nck1","Nck2","Nfam1","Nfatc1","Nlrc3","P2rx7","Patz1…
GO:0055080	7	cation homeostasis	103	555	67.1251	5.52234e-06	6.92381e-05	["Abl2","Adm","Adra1a","Aplp2","Apoe","Atox1","Atp1a2","Atp1a3","Atp1b3","Atp2b2","Atp2c1","Atp6v0a1","Atp6v0d2","Atp6v1a","Atp6v1e1","B2m","Bak1","Cacna1a","Car2","Ccdc22","Ccl3","Ccl5","Ccr9","Cd38","Cd40","Cd55","Cftr","Cln5","Cln6","Cnnm2","Cp","Cxcl1","Cxcr3","Cxcr4","Cysltr1","Edn1","Egfr","F2r","Fbxl5","Fth1","Ftl1","Gja1","Gnb1","Gtf2i","Heph","Hexb","Hfe","Hyal2","Il1b","Il6st","Itgb3","…
GO:0042306	8	regulation of protein import into nucleus	42	172	20.8027	5.60434e-06	7.0014e-05	["Akap6","Bambi","Bcl3","Ccdc22","Cdkn1a","Csf3","Egfr","Erbb4","Fam89b","Gbp4","Hcls1","Hnf4a","Hyal2","Il12b","Il18","Il1b","Il23a","Il6","Jak2","Nfkbie","Nlrp3","Parp1","Pik3r2","Pkd1","Pkig","Ppp3ca","Psmd10","Rbck1","Rbpms","Slc9a1","Smad3","Sppl3","Sufu","Tgfb1","Tgfbr1","Tlr2","Tlr9","Tmem173","Tnf","Tonsl","Tpr","Txn1"]
GO:0002573	7	myeloid leukocyte differentiation	29	101	12.2156	5.61847e-06	7.0014e-05	["Acp5","Batf","Batf2","Car2","Cd300lf","Cebpa","Csf2","Csf3","Gab3","Hhex","L3mbtl3","Ltbr","Mef2c","Mitf","Mmp9","Nfatc1","Notch2","Parp1","Pirb","Pparg","Psen2","Rbpj","Relb","Snx10","Tgfb1","Tgfbr2","Tnf","Tnfsf9","Zfpm1"]
GO:0070555	6	response to interleukin-1	29	101	12.2156	5.61847e-06	7.0014e-05	["Adamts12","Adamts7","Aes","Apoe","Bmi1","Ccl3","Ccl5","Cd38","Cyba","Edn1","Fn1","Hyal1","Hyal2","Icam1","Il6","Irak2","Irak3","Lcn2","Mmp3","Mmp9","Myd88","Nfkb1","Nos2","Otub1","P2ry2","Ppp4c","Serpine1","Src","Xylt1"]
GO:0030163	5	protein catabolic process	76	379	45.8386	5.65572e-06	7.03351e-05	["Adamts12","Agap3","Ambp","Anapc10","Anapc11","Anapc2","Ap1s1","Apoe","Arrb1","Atg7","Atm","Bace2","Cdk2","Chek2","Cln5","Cln6","Cln8","Ctsd","Cul1","Ddb1","Dennd3","Edem1","Enc1","Fbxl5","Fbxo6","Foxred2","Hectd3","Hpse","Htra2","Kctd13","Manba","Mmp3","Nedd4l","Nfe2l2","Ngly1","Nlrp1b","Nrros","P2rx7","Psma2","Psma3","Psma4","Psma5","Psma6","Psmb4","Psmb7","Psmc1","Psmc2","Psmc4","Psmc6","Psmd…
GO:0050707	6	regulation of cytokine secretion	35	133	16.0858	5.68058e-06	7.05012e-05	["Abl2","C5ar2","Cadm1","Casp1","Casp4","Ccl3","Cd274","Chia1","F2r","Fn1","Hyal2","Il1a","Il1f5","Il6","Irf3","Lyn","Nlrp10","Nlrp3","Nod2","P2rx7","Rasgrp1","Scamp5","Sptbn1","Src","Srgn","Syk","Tlr1","Tlr2","Tlr6","Tlr9","Tnf","Tnfrsf21","Tnfsf15","Tnfsf4","Trim16"]
GO:0042307	7	positive regulation of protein import into nucleus	28	96	11.6108	5.81287e-06	7.19974e-05	["Akap6","Bambi","Csf3","Egfr","Erbb4","Hcls1","Hyal2","Il12b","Il18","Il1b","Il23a","Il6","Jak2","Parp1","Pik3r2","Ppp3ca","Rbck1","Rbpms","Slc9a1","Smad3","Sppl3","Tgfb1","Tgfbr1","Tlr2","Tlr9","Tmem173","Tnf","Tpr"]
GO:0042278	6	purine nucleoside metabolic process	50	219	26.4872	5.99614e-06	7.41176e-05	["Acot7","Adssl1","Ahcyl2","Aprt","Atp5d","Atp5g1","Atp6v0a1","Atp6v1a","Bhmt","Chchd10","Coasy","Crot","Dcakd","Dguok","Dnmt1","Dnmt3a","Eno1","Eno1b","Enpp1","Enpp4","Gamt","Guk1","Hk2","Hk3","Hspa8","Icmt","Mccc2","Mlycd","Mri1","Msh2","Myh6","Myh8","Nme3","Nme4","Nt5c1a","Osgep","Pank1","Pfkfb2","Pfkfb3","Pfkfb4","Pfkm","Pnp","Prkag2","Prps2","Rhoq","Slc25a13","Slc35b2","Tgfb1","Uqcrc1","Vps9…
GO:0045639	7	positive regulation of myeloid cell differentiation	26	86	10.4014	6.0223e-06	7.42912e-05	["Acvr1b","Acvr2a","Car2","Ccl3","Ccl5","Csf2","Csf3","Ctnnbip1","Fadd","Fes","Foxo3","Hcls1","Il12b","Il23a","Inhba","Inpp5d","Isg15","Itgb3","Kitl","Lif","Notch2","Pf4","Rab7b","Smap1","Tmem64","Tnf"]
GO:0007507	4	heart development	55	249	30.1156	6.06513e-06	7.46693e-05	["Adap2","Adipor2","Adm","Adra1a","Aldh1a2","Atm","Calcrl","Casp3","Casp7","Dvl2","Edn1","Erbb4","Fbn1","Fgf12","Gab1","Gja1","Gys1","Hdac5","Heg1","Id3","Ift172","Il1a","Itga4","Jmjd6","Map2k5","Mef2c","Mef2d","Mmp9","Mospd3","Mthfd1","Myh6","Nfatc1","Notch1","Nrg1","Nrp1","Nrp2","Pcna","Pcsk5","Pdlim5","Pkd1","Pparg","Ptprj","Rapgef4","Rbpj","Tab2","Tdgf1","Tfdp2","Tgfbr1","Tgfbr2","Tsc2","Txnr…
GO:0045930	7	negative regulation of mitotic cell cycle	53	237	28.6642	6.09093e-06	7.48367e-05	["Anapc10","Anapc11","Anapc2","Atm","Brinp1","Brinp3","Casp2","Cdk2","Cdk5rap3","Cdkn1a","Chek2","Ctdsp1","Ctdsp2","Dgkz","Egfr","Fgfr2","Foxn3","Foxo4","Fzd3","Hmga2","Hnf4a","Ier3","Kank2","Mad2l1bp","Msh2","Nacc2","Ovol1","Plk3","Psma2","Psma3","Psma4","Psma5","Psma6","Psmb4","Psmb7","Psmc1","Psmc2","Psmc4","Psmc6","Psmd1","Psmd10","Psmd12","Psmd5","Psmd7","Rad9a","Rfwd2","Smad3","Tgfb1","Timp…
GO:0016051	5	carbohydrate biosynthetic process	34	128	15.4811	6.15929e-06	7.55253e-05	["Atf3","B3gnt3","B3gnt8","B4galt1","B4gat1","Chst12","Chst14","Eno1","Ext1","Ext2","Fut8","G6pc2","Gbe1","Gnpda1","Got1","Gpd2","Gsto1","Gulo","Gys1","Has1","Impa2","Mpdu1","Ndst1","Pck2","Pmm1","Prkacb","Ptges3","Slc25a10","Slc25a11","Slc25a13","Slc2a1","Sord","St6galnac6","Taldo1"]
GO:0019941	7	modification-dependent protein catabolic process	76	380	45.9596	6.24673e-06	7.64445e-05	["Agap3","Anapc10","Anapc11","Anapc2","Ap1s1","Arrb1","Bag6","Cacul1","Cdk2","Cul1","Cul7","Cul9","Ddb1","Edem1","Fbxl5","Fbxo21","Fbxo22","Fbxo6","Fbxo8","Fbxw4","Foxred2","Hectd3","Isg15","Kctd13","Lnx1","Mvb12a","Mvb12b","Ndfip1","Nedd4l","Nfe2l2","Nrros","Pcyox1","Pink1","Psma2","Psma3","Psma4","Psma5","Psma6","Psmb4","Psmb7","Psmc1","Psmc2","Psmc4","Psmc6","Psmd1","Psmd10","Psmd12","Psmd5","…
GO:0006664	6	glycolipid metabolic process	28	97	11.7318	7.23708e-06	8.83875e-05	["Arsa","Arsb","B4galt6","Cerk","Cln6","Ctsa","Dpm2","Dpm3","Gla","Gltp","Gm2a","Gpaa1","Hexb","Itgb8","Mppe1","Naga","Neu1","Pigh","Pigq","Pigs","Pigt","Pigyl","Pigz","Psap","Smpd1","St6galnac6","St8sia2","Ugcg"]
GO:0044282	5	small molecule catabolic process	60	281	33.9859	7.28177e-06	8.87565e-05	["Abcd1","Abhd12","Acaa2","Acads","Acot2","Acot7","Acox3","Akr1c18","Aldh1l1","Aldh2","Aldh4a1","Amdhd2","Apoe","Arg1","Arg2","Bckdha","Bckdk","Cbr1","Cbr3","Cpt1a","Crat","Crot","Dbt","Ddah2","Decr1","Dld","Dtd1","Ech1","Ethe1","Gcdh","Gk","Glul","Got1","Gpd2","Gpt2","Hadh","Hdc","Hibch","Hmgcl","Impa2","Ivd","Mccc2","Nagk","Nos2","Nudt1","Nudt3","Pccb","Pcyox1","Pdpr","Pla2g15","Qdpr","Renbp","…
GO:0040008	4	regulation of growth	121	680	82.2434	7.29748e-06	8.87715e-05	["Aatk","Acsl4","Acvr1b","Adam15","Adam17","Adipor2","Aes","Ahr","Akap6","Anapc2","Apoe","Blzf1","Cd38","Cd44","Cdhr2","Cdkn1a","Cib1","Cish","Commd5","Cpne6","Cyba","Dcbld2","Dcun1d3","Ddr1","Dnajc2","Draxin","Eno1","Enpp1","Erbb4","Extl3","Ezr","Fgfr2","Flcn","Fn1","Foxk1","Fto","Gamt","Gas2l1","Gja1","H3f3a","H3f3b","Hmga2","Hnf4a","Hsd3b7","Htra1","Htra2","Hyal1","Hyal2","Ifrd1","Igfbp4","Igf…
GO:1901605	5	alpha-amino acid metabolic process	56	257	31.0832	7.71097e-06	9.36157e-05	["Abhd12","Adi1","Adssl1","Ahcyl2","Aldh1l1","Aldh4a1","Arg1","Arg2","Ass1","Bhmt","Ckb","Ddah2","Dld","Dnmt1","Dnmt3a","Dtd1","Egln1","Folh1","Gamt","Gcdh","Gch1","Gfpt2","Glul","Got1","Gpt2","Hdc","Hibch","Hmgcl","Hnf4a","Icmt","Ivd","Mccc2","Mpst","Mri1","Msra","Mthfd1","Mthfd1l","Mthfd2l","Mtr","Nos2","P4ha1","P4ha2","Padi2","Pdpr","Plod1","Pycrl","Qdpr","Serinc5","Shmt2","Slc19a1","Slc27a1",…
GO:0045732	7	positive regulation of protein catabolic process	53	239	28.9061	7.86992e-06	9.53567e-05	["Adam8","Anapc10","Anapc11","Anapc2","Apoe","Atg7","Bag6","Cblb","Ccdc22","Cdk5rap3","Cebpa","Crebrf","Csnk1e","Ctsc","Cul1","Ezr","Fbxl5","Fbxo22","Gja1","Hspbp1","Ier3","Il1b","Ndfip1","Ndufa13","Nedd4l","Plk3","Psen2","Psma2","Psma3","Psma4","Psma5","Psma6","Psmb4","Psmb7","Psmc1","Psmc2","Psmc4","Psmc6","Psmd1","Psmd10","Psmd12","Psmd5","Psmd7","Rfwd2","Snx33","Snx9","Stub1","Sumo3","Tiparp"…
GO:0006873	6	cellular ion homeostasis	91	480	58.0542	8.00518e-06	9.66171e-05	["Abl2","Adm","Adra1a","Aplp2","Apoe","Atox1","Atp1a2","Atp1a3","Atp1b3","Atp2b2","Atp2c1","Atp6v0a1","Atp6v0d2","Atp6v1a","Atp6v1e1","Bak1","Cacna1a","Car2","Ccdc22","Ccl3","Ccl5","Ccr9","Cd38","Cd40","Cd55","Cftr","Ckb","Cln5","Cln6","Cp","Cxcl1","Cxcr3","Cxcr4","Cysltr1","Edn1","Enpp1","F2r","Fth1","Ftl1","Gja1","Gnb1","Gtf2i","Heph","Hexb","Hfe","Il1b","Il6st","Itgb3","Itpr3","Jak2","Kcnj2","…
GO:0002695	6	negative regulation of leukocyte activation	37	146	17.6581	8.01298e-06	9.66171e-05	["Adam8","Adora2a","Atm","Casp3","Cblb","Cd274","Cd300a","Cd37","Cd37 (ENSMUSG00000109208)","Cnr2","D930015E06Rik","Dusp3","Fcgr2b","Il20rb","Inhba","Inpp5d","Lyn","Mertk","Milr1","Ndfip1","Peli1","Pkn1","Prdm1","Prdx2","Ptpn2","Samsn1","Sla2","Socs6","Sox11","Tgfb1","Thoc1","Tnfaip8l2","Tnfrsf13b","Tnfrsf21","Tnfsf4","Zc3h12a","Zc3h12d"]
GO:0006665	5	sphingolipid metabolic process	33	124	14.9973	8.02122e-06	9.66171e-05	["Arsa","Arsb","B4galt6","Cerk","Cers6","Cln6","Cln8","Csnk1g2","Ctsa","Gla","Gltp","Gm2a","Hexb","Htra2","Itgb8","Kdsr","Naga","Neu1","P2rx7","Pla2g15","Prkd1","Psap","Serinc5","Sgpl1","Smpd1","Sphk2","Spns2","Sptlc2","Sptssb","St6galnac6","St8sia2","Tex2","Ugcg"]
GO:0046777	8	protein autophosphorylation	47	204	24.673	8.70931e-06	0.0001047	["Aatk","Abl2","Acvr1b","Atm","Chek2","Csk","Csnk1g2","Csnk1g3","Dapk1","Ddr1","Egfr","Eif2ak2","Eif2s1","Epha4","Erbb4","Fes","Fgfr2","Flt1","Hck","Irak2","Irak3","Jak2","Kdr","Lyn","Map3k1","Map3k11","Map3k3","Map3k9","Matk","Mex3b","Mink1","Mknk2","Mob1b","Myo3b","Pdgfrb","Pim1","Pink1","Prkcd","Prkd1","Sik1","Src","Stk10","Stk17b","Syk","Tgfbr1","Ulk1","Ulk2"]
GO:1903708	6	positive regulation of hemopoiesis	42	175	21.1656	8.88423e-06	0.000106565	["Acvr1b","Acvr2a","Adam8","Bmi1","Car2","Ccl3","Ccl5","Csf2","Csf3","Ctnnbip1","Cxcl1","Fadd","Fes","Flt1","Foxo3","Hcls1","Il12a","Il12b","Il1b","Il1rl2","Il23a","Il6","Inhba","Inpp5d","Isg15","Itgb3","Kitl","Lif","Notch2","Pf4","Pnp","Prdm1","Rab7b","Sash3","Smap1","Syk","Tgfbr2","Tmem64","Tnf","Tnfsf4","Tnfsf9","Zbtb16"]
GO:0046822	8	regulation of nucleocytoplasmic transport	49	216	26.1244	8.89922e-06	0.000106565	["Akap6","Bambi","Bcl3","Camk1","Ccdc22","Cdkn1a","Csf3","Ctdspl2","Egfr","Erbb4","Fam89b","Gbp4","Hcls1","Hnf4a","Hyal2","Ier3","Il12b","Il18","Il1b","Il23a","Il6","Jak2","Nfkbie","Nlrp3","Parp1","Pik3r2","Pkd1","Pkig","Ppp1r12a","Ppp3ca","Psmd10","Rbck1","Rbpms","Slc9a1","Smad3","Sp100","Sppl3","Sufu","Tcf7l2","Tgfb1","Tgfbr1","Tlr2","Tlr9","Tmem173","Tnf","Tonsl","Tpr","Txn1","Wipf1"]
GO:0032655	6	regulation of interleukin-12 production	17	45	5.44258	9.3241e-06	0.000111435	["Acp5","Cd40","Cmklr1","Il12b","Il23a","Irak3","Irf5","Irf8","Mefv","Nfkb1","Nod2","Rel","Tlr2","Tlr6","Tlr9","Tnfsf4","Tnfsf9"]
GO:0032956	6	regulation of actin cytoskeleton organization	59	277	33.5021	9.35402e-06	0.000111575	["Abl2","Amot","Arhgef10l","Arpc4","Baiap2","Bcas3","Braf","Brk1","Capg","Ccl24","Cdc42ep2","Cdc42ep3","Coro1a","Crk","Csf3","Ctsl","Cyfip1","Edn1","Eln","F11r","Fes","Fhod1","Gsn","Hck","Hcls1","Icam1","Jmy","Kank2","Limk1","Lrp1","Map3k1","Mef2c","Mtss1","Myadm","Myo1f","Nck1","Nck2","Nf2","Pdgfa","Pdgfrb","Phpt1","Pik3r2","Plek","Plekhh2","Prkcd","Rhoq","Rock1","S1pr1","Sdc4","Sh3bgrl3","Slc9a…
GO:0072395	5	signal transduction involved in cell cycle checkpoint	23	73	8.82907	9.55789e-06	0.000113682	["Atm","Casp2","Cdk2","Cdkn1a","Chek2","Psma2","Psma3","Psma4","Psma5","Psma6","Psmb4","Psmb7","Psmc1","Psmc2","Psmc4","Psmc6","Psmd1","Psmd10","Psmd12","Psmd5","Psmd7","Rfwd2","Sox11"]
GO:0071356	7	cellular response to tumor necrosis factor	26	88	10.6433	9.56773e-06	0.000113682	["Adamts12","Adamts7","Ass1","Ccl3","Ccl5","Cib1","Cyba","Cyp1b1","Edn1","Entpd1","Hyal1","Hyal2","Icam1","Il18","Il6","Kat2a","Lcn2","Mmp9","Nfe2l2","Nos2","Pid1","Slc11a2","Tdgf1","Tnfrsf21","Vcam1","Ybx3"]
GO:0006511	8	ubiquitin-dependent protein catabolic process	74	372	44.992	1.00102e-05	0.000118709	["Agap3","Anapc10","Anapc11","Anapc2","Ap1s1","Arrb1","Bag6","Cacul1","Cdk2","Cul1","Cul7","Cul9","Ddb1","Edem1","Fbxl5","Fbxo21","Fbxo22","Fbxo6","Fbxo8","Fbxw4","Foxred2","Hectd3","Kctd13","Lnx1","Mvb12a","Mvb12b","Ndfip1","Nedd4l","Nfe2l2","Nrros","Pink1","Psma2","Psma3","Psma4","Psma5","Psma6","Psmb4","Psmb7","Psmc1","Psmc2","Psmc4","Psmc6","Psmd1","Psmd10","Psmd12","Psmd5","Psmd7","Rad23a","…
GO:0006575	4	cellular modified amino acid metabolic process	49	217	26.2453	1.01644e-05	0.000120305	["Abhd12","Ahcyl2","Aldh1l1","Aldh4a1","Ass1","Bhmt","Cacna1a","Ckb","Coasy","Ddah2","Dnmt1","Dnmt3a","Duox1","Duox2","Egln1","Ethe1","Folh1","Gamt","Gch1","Ggct","Gpx1","Gsr","Gstm5","Gstt1","Gstt3","Haghl","Icmt","Idh1","Mpst","Mri1","Mthfd1","Mthfd1l","Mthfd2l","Mtr","P4ha1","P4ha2","Padi2","Pank1","Pcyox1","Plod1","Pnkd","Serinc5","Shmt2","Slc19a1","Slc27a1","Slc46a1","Slc5a6","Slc6a8","Vnn3"]
GO:1903649	7	regulation of cytoplasmic transport	86	450	54.4258	1.02354e-05	0.000120912	["Akap6","Atp1a2","Bak1","Bambi","Bcl3","Camk1","Ccdc22","Cdkn1a","Cemip","Coro1a","Csf3","Csk","Ctdspl2","Cxcl9","Cxcr3","Cyb5r1","Cyba","Egfr","Erbb4","Ezr","F2r","Fam89b","Fzd5","Gbp4","Gsto1","Hcls1","Hnf4a","Htra2","Hyal2","Ier3","Il12b","Il18","Il1b","Il23a","Il6","Itgb3","Jak2","Kat2a","Kcnn3","Lyn","Map2k1","Nfkbie","Nlrp3","Npepps","Nrg1","P2rx7","Parp1","Pik3r2","Pink1","Pkd1","Pkig","P…
GO:0044283	5	small molecule biosynthetic process	78	398	48.1366	1.02746e-05	0.000121142	["Acaa2","Acot7","Acss1","Adi1","Adm","Akr1c18","Aldh1a2","Aldh1l1","Aldh4a1","Alox5ap","Apoe","Ass1","Bhmt","Cept1","Cftr","Ch25h","Chst12","Chst14","Cotl1","Cyb5r1","Cyp27a1","Dhcr7","Dhrs9","Dsel","Ebp","Edn1","Fads1","Gamt","Gch1","Ggps1","Glul","Got1","Gpt2","Gsto1","Gulo","Hacd4","Hmgcl","Hpgds","Hsd17b12","Hsd17b3","Hsd3b7","Impa2","Ip6k1","Lpcat2","Ltc4s","Mlycd","Mri1","Mthfd1","Mthfd1l"…
GO:0002474	5	antigen processing and presentation of peptide antigen via MHC class I	34	131	15.844	1.0605e-05	0.000124797	["Abcb5","B2m","Bag6","Blmh","Cyba","Cybb","Erap1","Fcgr3","Gm11127","H2-Q4","H60b","Hfe","Ifi30","Itgb5","Mr1","Ncf4","Npepps","Psma2","Psma3","Psma4","Psma5","Psma6","Psmb4","Psmb7","Psmc1","Psmc2","Psmc4","Psmc6","Psmd1","Psmd10","Psmd12","Psmd5","Psmd7","Tpp2"]
GO:0042107	5	cytokine metabolic process	12	25	3.02365	1.08494e-05	0.000127428	["Cd28","Gadd45g","Il12b","Il18","Il19","Irf3","Myd88","Nod1","Pcsk5","Tnfsf15","Trem1","Trem3"]
GO:0043632	6	modification-dependent macromolecule catabolic process	76	386	46.6852	1.11885e-05	0.00013116	["Agap3","Anapc10","Anapc11","Anapc2","Ap1s1","Arrb1","Bag6","Cacul1","Cdk2","Cul1","Cul7","Cul9","Ddb1","Edem1","Fbxl5","Fbxo21","Fbxo22","Fbxo6","Fbxo8","Fbxw4","Foxred2","Hectd3","Isg15","Kctd13","Lnx1","Mvb12a","Mvb12b","Ndfip1","Nedd4l","Nfe2l2","Nrros","Pcyox1","Pink1","Psma2","Psma3","Psma4","Psma5","Psma6","Psmb4","Psmb7","Psmc1","Psmc2","Psmc4","Psmc6","Psmd1","Psmd10","Psmd12","Psmd5","…
GO:0031668	4	cellular response to extracellular stimulus	46	200	24.1892	1.13156e-05	0.000132397	["Adora2b","Aes","Angptl4","Atf3","Atg2a","Atg7","Ccl5","Cdkn1a","Ctsl","Eln","Fads1","Fbxo22","Fscn1","Gas2l1","Glul","Hfe","Higd1a","Icam1","Itga6","Lcn2","Ltc4s","Lyn","Mmp3","Mmp9","Mtr","Nbr1","Nfe2l2","Nos2","Nudt1","Optn","P2rx7","Pdk2","Pik3r4","Pparg","Prkcd","Rptor","Rragd","Sh3glb1","Slc2a1","Slc38a2","Tcf7l2","Tnc","Ucp2","Ulk1","Upp1","Wdr45"]
GO:0006811	4	ion transport	203	1265	152.997	1.14347e-05	0.000133481	["Abca1","Abca12","Abca13","Abcc1","Abcc3","Abcc5","Abcc8","Abcd1","Acsl4","Acsl5","Adra1a","Ank","Apoe","Aqp9","Arl2","Atox1","Atp10a","Atp13a2","Atp1a2","Atp1a3","Atp1b3","Atp2b2","Atp2c1","Atp5d","Atp5g1","Atp6v0a1","Atp6v0d2","Atp6v1a","Atp6v1e1","Atp8b1","Bak1","Cacna1a","Cacnb2","Cacnb3","Calcrl","Calhm2","Ccl3","Ccl5","Cd300a","Cdk2","Cftr","Chrnb3","Clcn5","Clic6","Cln8","Cnnm2","Cnnm3","…
GO:0030889	9	negative regulation of B cell proliferation	10	18	2.17703	1.14518e-05	0.000133481	["Atm","Casp3","Cd300a","Fcgr2b","Inpp5d","Lyn","Pkn1","Prdm1","Tnfrsf13b","Tnfrsf21"]
GO:0042060	5	wound healing	33	126	15.2392	1.15695e-05	0.000134374	["B4galt1","Casp3","Cd44","Dcbld2","Fn1","Gsn","Hpse","Il1a","Il1b","Il6","Itgb3","Map3k1","Mmp3","Nbeal2","Nos2","Notch2","Nrg1","Optn","P2ry1","P2ry2","Pdgfa","Pdgfrb","Plat","S100a8","Scarb1","Sdc4","Serpine1","Smad3","Tgfb1","Tgfbr1","Tgfbr2","Tnc","Treml1"]
GO:0043393	5	regulation of protein binding	41	171	20.6818	1.15824e-05	0.000134374	["Abl2","Adam15","Aes","Aplp2","Arhgef7","Arrb1","B2m","Bak1","Bambi","Camk1","Csf3","Ctnnbip1","Epb41","Gtpbp4","Hdac5","Hfe","Ica1","Itga4","Krit1","Ldlrap1","Lfng","Mapk8","Mef2c","Mfng","Mmp9","Nrg1","Nrp1","Pkd1","Plxnd1","Prkcd","Psen2","Rapgef2","Rock1","Sppl3","Src","Stk3","Stub1","Tcf7l2","Tgfbr1","Tmem173","Zfpm1"]
GO:2001234	7	negative regulation of apoptotic signaling pathway	49	218	26.3663	1.15942e-05	0.000134374	["Acaa2","Bcl2a1b","Bcl2l12","Bmf","Bmi1","Cd44","Cflar","Csf2","Dapk1","Gpx1","Higd1a","Htra2","Icam1","Ier3","Il19","Il1a","Il1b","Itga6","Ivns1abp","Map2k5","Mkl1","Mmp9","Mnt","Ndufa13","Nfe2l2","Nrg1","Nrp1","Pea15a","Pf4","Pink1","Plaur","Prdx2","Psen2","Psmd10","Rffl","Rps6kb1","Scrt2","Serpine1","Sgk3","Sh3glb1","Slc35f6","Src","Syvn1","Tcf7l2","Tgfbr1","Tnf","Tnfsf4","Ybx3","Zfp385a"]
GO:0044265	5	cellular macromolecule catabolic process	119	673	81.3968	1.17067e-05	0.000135422	["Adamts12","Agap3","Ago3","Ago4","Anapc10","Anapc11","Anapc2","Ap1s1","Arrb1","Atm","Bag6","Cacul1","Casp3","Cdk2","Chek2","Cln6","Cln8","Cnot7","Cul1","Cul7","Cul9","Ddb1","Dedd2","Dennd3","Dhx34","Dna2","Dnase2a","Edem1","Eif4e","Eri3","Exosc5","Fau","Fbxl5","Fbxo21","Fbxo22","Fbxo6","Fbxo8","Fbxw4","Foxred2","Gspt1","Hectd3","Hnrnpd","Hpse","Htra2","Isg15","Kctd13","Lnx1","Manba","Mvb12a","Mv…
GO:0006644	5	phospholipid metabolic process	63	304	36.7676	1.1901e-05	0.000137411	["Abhd12","Acsl5","Agpat1","Agpat2","Agpat5","Atm","Cdipt","Cds2","Cept1","Cln8","Cpne6","Dolpp1","Dpm2","Dpm3","Fads1","Fig4","Ggps1","Gpaa1","Gpd1l","Hexb","Impa2","Inpp1","Inpp5b","Inpp5d","Inppl1","Ip6k1","Lipg","Lpcat2","Mppe1","Mtm1","Mtmr3","Mvk","Pcyt1a","Pdgfrb","Pi4kb","Pigh","Pigq","Pigs","Pigt","Pigyl","Pigz","Pik3c2a","Pik3r2","Pik3r4","Pik3r5","Pik3r6","Pip4k2a","Pla2g15","Plaa","Pl…
GO:0006661	7	phosphatidylinositol biosynthetic process	26	89	10.7642	1.19747e-05	0.000138002	["Atm","Cdipt","Dpm2","Dpm3","Fig4","Gpaa1","Inpp5d","Inppl1","Mppe1","Mtm1","Mtmr3","Pi4kb","Pigh","Pigq","Pigs","Pigt","Pigyl","Pigz","Pik3c2a","Pik3r2","Pik3r4","Pik3r5","Pik3r6","Pip4k2a","Slc27a1","Synj2"]
GO:0034110	7	regulation of homotypic cell-cell adhesion	62	298	36.042	1.22325e-05	0.000140709	["Adam8","Adamts18","Adora2a","Bmi1","Casp3","Cblb","Ccl5","Cd274","Cd28","Cd300a","Cd44","Cd55","Coro1a","Csk","Ctla2a","D930015E06Rik","Dusp3","Ebi3","Fadd","Flot2","Gsn","Icam1","Il12a","Il12b","Il18","Il1b","Il1rl2","Il20rb","Il23a","Il27","Il6","Il6st","Itgal","Lyn","Map2k1","Map3k14","Map3k8","Nck1","Nck2","Ndfip1","Nod2","Peli1","Pnp","Prdx2","Prkcd","Ptpn2","Sash3","Sh2d2a","Socs6","Spink…
GO:0042590	6	antigen processing and presentation of exogenous peptide antigen via MHC class I	23	74	8.95002	1.22929e-05	0.000141005	["B2m","Cyba","Cybb","Fcgr3","Ifi30","Itgb5","Ncf4","Psma2","Psma3","Psma4","Psma5","Psma6","Psmb4","Psmb7","Psmc1","Psmc2","Psmc4","Psmc6","Psmd1","Psmd10","Psmd12","Psmd5","Psmd7"]
GO:1901988	7	negative regulation of cell cycle phase transition	43	183	22.1332	1.23043e-05	0.000141005	["Anapc10","Anapc11","Anapc2","Atm","Casp2","Cdk2","Cdk5rap3","Cdkn1a","Chek2","Ctdsp1","Ctdsp2","Dgkz","Foxn3","Foxo4","Hmga2","Ier3","Kank2","Mad2l1bp","Nacc2","Ovol1","Plk3","Psma2","Psma3","Psma4","Psma5","Psma6","Psmb4","Psmb7","Psmc1","Psmc2","Psmc4","Psmc6","Psmd1","Psmd10","Psmd12","Psmd5","Psmd7","Rfwd2","Sox11","Susd2","Tpr","Tpra1","Zc3h12d"]
GO:0009895	6	negative regulation of catabolic process	45	195	23.5845	1.28057e-05	0.000146477	["Anapc10","Anapc11","Anapc2","Atg7","Atm","Atraid","Bag6","Bscl2","Cdk5rap3","Dhx34","Egfr","Egln1","Gipc1","Hcar2","Hfe","Hp","Ier3","Il1b","Irak3","Klhl40","Mad2l1bp","N4bp1","Nos2","Npc1","Nrg1","Ophn1","Pde3b","Pink1","Psen2","Qsox1","Ric1","Rnf5","Slirp","Smad3","Stat3","Sufu","Tbc1d14","Timp2","Tlk2","Tnf","Tpr","Ubqln4","Ubxn1","Wac","Wdr6"]
GO:1903706	5	regulation of hemopoiesis	70	349	42.2102	1.28926e-05	0.000147197	["Acvr1b","Acvr2a","Adam8","Atg7","Bmi1","C1qc","Car2","Ccl3","Ccl5","Cib1","Clec2d","Csf2","Csf3","Csf3r","Ctla2a","Ctnnbip1","Cxcl1","D930015E06Rik","Eif2ak2","Fadd","Fes","Flcn","Flt1","Foxo3","Gas2l1","Hcls1","Il12a","Il12b","Il1b","Il1rl2","Il23a","Il27","Il6","Inhba","Inpp5d","Isg15","Itgb3","Kdr","Kitl","Klf13","Ldb1","Lif","Lmo2","Lyn","Mafb","Mef2c","Mitf","Ndfip1","Nfam1","Notch1","Notc…
GO:0070302	6	regulation of stress-activated protein kinase signaling cascade	46	201	24.3102	1.29776e-05	0.000147892	["Ambp","Crk","Dusp3","Dvl2","Edn1","Eif2ak2","Epha4","Fgd4","Fzd5","Gab1","Gadd45b","Gadd45g","Il1a","Il1b","Ltbr","Lyn","Map2k1","Map3k1","Map3k11","Map3k3","Map3k9","Map4k4","Mapkbp1","Mecom","Mink1","Myd88","Nbr1","Nod1","Nod2","Nox1","Pdcd10","Pdcd4","Pink1","Pkn1","Ppef2","Rap2a","Rasgrp1","Sema4c","Sh3rf3","Stk3","Syk","Taok1","Tlr6","Tlr9","Tnf","Xdh"]
GO:0071216	4	cellular response to biotic stimulus	52	237	28.6642	1.30695e-05	0.000148662	["Abca1","Arg1","Arg2","Ass1","Ccl5","Cd180","Cd300lb","Cd40","Cdk19","Csf2","Csf3","Entpd1","Fcgr2b","Fcgr4","Fn1","Fzd5","Gfi1","Hdac5","Icam1","Il12a","Il12b","Il18","Il1b","Il6","Irf3","Irf8","Jak2","Lcn2","Ltc4s","Mapk8","Mef2c","Mmp9","Nfkb1","Nlrp3","Nod2","Nos2","P2ry2","Plscr4","Ppp1r15b","Serpine1","Src","Syk","Tlr1","Tlr2","Tlr6","Tlr9","Tnf","Tnfrsf1b","Tnfsf4","Tnip3","Trem2","Zc3h12…
GO:0002221	6	pattern recognition receptor signaling pathway	37	149	18.021	1.31609e-05	0.000149424	["Cnpy3","Ctsb","Ctsl","Dusp3","Dusp7","Fadd","Ifih1","Ikbke","Irak2","Irak3","Irf3","Map2k1","Map3k1","Mapk8","Marco","Mef2c","Myd88","Nfkb1","Nfkb2","Nod1","Nod2","Peli1","Peli2","Pik3r4","Scarb1","Tab2","Tank","Tbk1","Tlr1","Tlr13","Tlr2","Tlr6","Tlr9","Tnip1","Tnip3","Ube2d3","Ube2n"]
GO:0070085	5	glycosylation	62	299	36.1629	1.36409e-05	0.000154471	["Adamts7","Adamtsl1","Alg10b","Alg11","B3gat3","B3gnt3","B3gnt8","B4galt1","B4galt4","B4galt6","B4gat1","Cds2","Cln5","Cmas","Ctsa","Dolpp1","Dpm2","Dpm3","Edem1","Ext1","Ext2","Fut8","Galnt12","Gcnt1","Gcnt2","Gcnt3","Gfpt2","Gorasp1","Lmf1","Lrp2","Man1c1","Man2a2","Mgat1","Mgat4a","Mgat4b","Mgat5","Mlec","Muc5ac","Nagpa","Neu1","Npc1","Nus1","Parp1","Pigz","Pmm1","Pomk","Pomt2","Serp1","Slc17…
GO:0042129	8	regulation of T cell proliferation	35	138	16.6906	1.36557e-05	0.000154471	["Bmi1","Casp3","Cblb","Ccl5","Cd274","Cd28","Cd55","Coro1a","D930015E06Rik","Ebi3","Fadd","Icam1","Il12a","Il12b","Il18","Il1b","Il20rb","Il23a","Il27","Il6","Il6st","Itgal","Nck1","Nck2","Ndfip1","Peli1","Pnp","Sash3","Syk","Tgfb1","Tnfrsf21","Tnfsf4","Tnfsf9","Vcam1","Zc3h12d"]
GO:0007346	6	regulation of mitotic cell cycle	92	493	59.6265	1.37131e-05	0.000154834	["Anapc10","Anapc11","Anapc2","Atm","Brinp1","Brinp3","Casp2","Ccnb3","Cd28","Cdk2","Cdk5rap3","Cdkn1a","Chek2","Ctc1","Ctdsp1","Ctdsp2","Cul7","Cul9","Ddb1","Dgkz","Dusp1","Dusp3","E2f1","Edn1","Egfr","Eif4e","Fgfr2","Foxn3","Foxo4","Fzd3","Hmga2","Hnf4a","Ier3","Il1a","Il1b","Ino80","Kank2","Lrp5","Mad2l1bp","Map3k1","Map3k14","Map3k8","Map4k4","Mink1","Msh2","Nacc2","Ovol1","Pdgfrb","Pebp1","P…
GO:0055085	4	transmembrane transport	189	1168	141.265	1.39249e-05	0.000156936	["Abca1","Abca12","Abca13","Abca15","Abca2","Abcb5","Abcb8","Abcc1","Abcc3","Abcc4","Abcc5","Abcc6","Abcc8","Abcd1","Adcy3","Adcy7","Adcy9","Add3","Ank","Aqp9","Atox1","Atp10a","Atp1a2","Atp1a3","Atp1b3","Atp2b2","Atp2c1","Atp5d","Atp5g1","Atp6v0a1","Atp6v0d2","Atp6v1a","Atp6v1e1","Atp8b1","Bak1","Cacna1a","Cacnb2","Cacnb3","Calhm2","Cftr","Chrnb3","Clcn5","Clic6","Cp","Cpt1a","Csf2","Ebp","Edn1"…
GO:1903651	7	positive regulation of cytoplasmic transport	56	262	31.6879	1.40022e-05	0.000157518	["Akap6","Bak1","Bambi","Camk1","Cemip","Csf3","Ctdspl2","Cxcl9","Cxcr3","Cyb5r1","Egfr","Erbb4","Ezr","F2r","Fzd5","Hcls1","Htra2","Hyal2","Il12b","Il18","Il1b","Il23a","Il6","Jak2","Kat2a","Kcnn3","Npepps","Nrg1","P2rx7","Parp1","Pik3r2","Pink1","Plagl2","Ppp3ca","Psmb7","Rbck1","Rbpms","Rhou","Sh3glb1","Slc9a1","Smad3","Sppl3","Stard7","Tbc1d20","Tcf7l2","Tgfb1","Tgfbr1","Tlr2","Tlr9","Tmem173…
GO:0014910	7	regulation of smooth muscle cell migration	20	60	7.25677	1.40996e-05	0.000158324	["Ccl5","Cyp1b1","F3","Igfbp5","Il18","Il6st","Itgb3","Lpar1","Lrp1","Ndrg4","Nrp1","P2ry2","P2ry6","Pdgfa","Pdgfrb","Rapgef4","Rbpj","Rps6kb1","Serpine1","Src"]
GO:0006351	6	transcription, DNA-templated	317	2110	255.196	1.4159e-05	0.0001587	["Aebp1","Aes","Aff1","Ahctf1","Ahr","Akna","Ang","Anp32a","Arhgap22","Arid1b","Arid5a","Arid5b","Arrb1","Ascc1","Ascc3","Atf3","Atf6b","Atmin","BC094916","Batf","Batf2","Baz1a","Bcas3","Bcl3","Bcl9l","Bdp1","Bend6","Bmi1","Calcoco1","Cbx4","Cbx6","Cbx7","Cbx8","Cc2d1a","Cc2d1b","Ccar1","Ccdc59","Cdca7l","Cdk8","Cebpa","Chaf1b","Chek2","Cipc","Cnot7","Col4a2","Commd5","Cops2","Creb3l2","Crebrf","…
GO:0050920	5	regulation of chemotaxis	39	161	19.4723	1.45293e-05	0.000162257	["Adam17","Angpt2","C5ar2","Camk1d","Ccl3","Ccl5","Cmklr1","Cxcl1","Cxcl9","Cxcr3","Cxcr4","Edn1","F3","Fn1","Il16","Il1b","Il23a","Il6","Kdr","Lpar1","Lyn","Megf8","Mtus1","Nod2","Notch1","Nrp1","Padi2","Pdgfrb","Pf4","Prkd1","Ptpn2","Ptprj","Robo2","S1pr1","Serpine1","Smad3","St6gal1","Tgfb1","Vegfb"]
GO:2000377	6	regulation of reactive oxygen species metabolic process	39	161	19.4723	1.45293e-05	0.000162257	["Acp5","Akr1c18","Arg2","Ass1","Cdkn1a","Cxcl1","Cyba","Cyp1b1","Ddah2","Edn1","Egfr","Foxo3","Gla","Hp","Icam1","Ier3","Il18","Il1b","Il6","Jak2","Mmp3","Nfe2l2","Nox1","Pdgfrb","Pid1","Pink1","Prcp","Prdx2","Prkcd","Ptx3","Stat3","Syk","Tgfb1","Tgfbr2","Tlr2","Tnf","Trim30a","Xdh","Zc3h12a"]
GO:0097659	7	nucleic acid-templated transcription	317	2111	255.317	1.47218e-05	0.000164108	["Aebp1","Aes","Aff1","Ahctf1","Ahr","Akna","Ang","Anp32a","Arhgap22","Arid1b","Arid5a","Arid5b","Arrb1","Ascc1","Ascc3","Atf3","Atf6b","Atmin","BC094916","Batf","Batf2","Baz1a","Bcas3","Bcl3","Bcl9l","Bdp1","Bend6","Bmi1","Calcoco1","Cbx4","Cbx6","Cbx7","Cbx8","Cc2d1a","Cc2d1b","Ccar1","Ccdc59","Cdca7l","Cdk8","Cebpa","Chaf1b","Chek2","Cipc","Cnot7","Col4a2","Commd5","Cops2","Creb3l2","Crebrf","…
GO:0071347	7	cellular response to interleukin-1	21	65	7.8615	1.49771e-05	0.000166379	["Adamts12","Adamts7","Apoe","Bmi1","Ccl3","Ccl5","Edn1","Fn1","Hyal1","Hyal2","Icam1","Il6","Lcn2","Mmp3","Mmp9","Nfkb1","Nos2","Otub1","P2ry2","Ppp4c","Serpine1"]
GO:0038093	8	Fc receptor signaling pathway	50	226	27.3338	1.49865e-05	0.000166379	["Ago3","Ago4","Akt1s1","Arpc4","Baiap2","Brk1","Casp9","Cd28","Cdkn1a","Crk","Cyfip1","Egfr","Elmo2","Erbb4","Fcgr3","Fcgrt","Fgfr2","Foxo3","Foxo4","Gab1","Hck","Itpr3","Lat2","Lcp2","Limk1","Lyn","Map2k1","Map3k1","Mapk8","Myo10","Nck1","Nckipsd","Nfatc1","Nfatc2","Nfkb1","Nrg1","Pdgfa","Pdgfrb","Pik3r2","Pld2","Ppp3ca","Prkcd","Rasgrp1","Src","Syk","Tab2","Tnrc6b","Tsc2","Ube2n","Wipf1"]
GO:0007040	5	lysosome organization	16	42	5.07974	1.50341e-05	0.000166379	["Abca1","Arsb","Cln5","Cln6","Cln8","Coro1a","Fam160a2","Gaa","Hexb","Hps1","Lamtor1","Naglu","Nagpa","P2rx7","Tpcn2","Vps18"]
GO:0080171	5	lytic vacuole organization	16	42	5.07974	1.50341e-05	0.000166379	["Abca1","Arsb","Cln5","Cln6","Cln8","Coro1a","Fam160a2","Gaa","Hexb","Hps1","Lamtor1","Naglu","Nagpa","P2rx7","Tpcn2","Vps18"]
GO:0019693	5	ribose phosphate metabolic process	58	275	33.2602	1.50895e-05	0.000166528	["Acot7","Adcy3","Adcy7","Adcy9","Adm","Adora2a","Adssl1","Aprt","Atp2b2","Atp5d","Atp5g1","Atp6v0a1","Atp6v1a","Calcrl","Chchd10","Coasy","Crot","Dcakd","Dhodh","Eno1","Eno1b","Enpp1","Gucy2e","Guk1","H6pd","Hk2","Hk3","Hspa8","Mccc2","Mlycd","Msh2","Myh6","Myh8","Nme3","Nme4","Pank1","Pde10a","Pde11a","Pde3b","Pde4a","Pfkfb2","Pfkfb3","Pfkfb4","Pfkm","Pgls","Pnp","Prkag2","Prps2","Rhoq","Slc25a…
GO:0002703	6	regulation of leukocyte mediated immunity	40	167	20.198	1.51019e-05	0.000166528	["Adora2b","B2m","Cadm1","Cd28","Cd300a","Cd40","Cd55","Clec2d","Cxcl1","Fadd","Fcgr2b","Fcgr3","Fes","Fzd5","Icam1","Il12a","Il12b","Il1b","Il20rb","Il23a","Lyn","Ndfip1","Nod2","Nos2","P2rx7","Pik3r6","Pld2","Pnp","Pvr","Rasgrp1","Sash3","Snx6","Syk","Tgfb1","Thoc1","Tlr2","Tlr9","Tnf","Tnfsf13","Tnfsf4"]
GO:0050871	8	positive regulation of B cell activation	22	70	8.46623	1.55042e-05	0.000169679	["Bmi1","Bst1","Cd28","Cd38","Cd40","Cdkn1a","Gpr183","Il13ra1","Il6","Inpp5d","Mef2c","Nfatc2","Nod2","Peli1","Pnp","Prdm1","Sash3","Syk","Tcf3","Tgfb1","Tnfsf13","Tnfsf4"]
GO:0072413	6	signal transduction involved in mitotic cell cycle checkpoint	22	70	8.46623	1.55042e-05	0.000169679	["Atm","Casp2","Cdk2","Cdkn1a","Chek2","Psma2","Psma3","Psma4","Psma5","Psma6","Psmb4","Psmb7","Psmc1","Psmc2","Psmc4","Psmc6","Psmd1","Psmd10","Psmd12","Psmd5","Psmd7","Rfwd2"]
GO:1902402	8	signal transduction involved in mitotic DNA damage checkpoint	22	70	8.46623	1.55042e-05	0.000169679	["Atm","Casp2","Cdk2","Cdkn1a","Chek2","Psma2","Psma3","Psma4","Psma5","Psma6","Psmb4","Psmb7","Psmc1","Psmc2","Psmc4","Psmc6","Psmd1","Psmd10","Psmd12","Psmd5","Psmd7","Rfwd2"]
GO:1902403	7	signal transduction involved in mitotic DNA integrity checkpoint	22	70	8.46623	1.55042e-05	0.000169679	["Atm","Casp2","Cdk2","Cdkn1a","Chek2","Psma2","Psma3","Psma4","Psma5","Psma6","Psmb4","Psmb7","Psmc1","Psmc2","Psmc4","Psmc6","Psmd1","Psmd10","Psmd12","Psmd5","Psmd7","Rfwd2"]
GO:0030003	7	cellular cation homeostasis	88	468	56.6028	1.5526e-05	0.000169679	["Abl2","Adm","Adra1a","Aplp2","Apoe","Atox1","Atp1a2","Atp1a3","Atp1b3","Atp2b2","Atp2c1","Atp6v0a1","Atp6v0d2","Atp6v1a","Atp6v1e1","Bak1","Cacna1a","Car2","Ccdc22","Ccl3","Ccl5","Ccr9","Cd38","Cd40","Cd55","Cftr","Cln5","Cln6","Cp","Cxcl1","Cxcr3","Cxcr4","Cysltr1","Edn1","F2r","Fth1","Ftl1","Gja1","Gnb1","Gtf2i","Heph","Hexb","Hfe","Il1b","Il6st","Itgb3","Itpr3","Jak2","Kcnj2","Kdr","Lcn2","L…
GO:0043011	6	myeloid dendritic cell differentiation	11	22	2.66082	1.55798e-05	0.000169964	["Batf","Batf2","Csf2","Ltbr","Notch2","Pirb","Rbpj","Relb","Tgfb1","Tgfbr2","Tnfsf9"]
GO:0050729	7	positive regulation of inflammatory response	29	106	12.8203	1.56951e-05	0.000170918	["Adam8","Adora2b","Alox5ap","Ccl24","Ccl3","Ccl5","Cd28","Cdk19","Egfr","Fcgr3","Hyal2","Il12b","Il17ra","Il18","Il1b","Il23a","Il6","Il6st","Jak2","Nod2","Osm","Rps19","S100a8","Serpine1","Tlr2","Tlr9","Tnf","Tnfsf4","Tnip1"]
GO:0001558	5	regulation of cell growth	80	416	50.3136	1.62797e-05	0.000176969	["Aatk","Acsl4","Acvr1b","Adam15","Adam17","Adipor2","Akap6","Anapc2","Apoe","Blzf1","Cd38","Cd44","Cdhr2","Cdkn1a","Cib1","Cish","Commd5","Cpne6","Cyba","Dcbld2","Dcun1d3","Ddr1","Dnajc2","Draxin","Eno1","Enpp1","Extl3","Flcn","Fn1","Foxk1","Gas2l1","H3f3a","H3f3b","Hnf4a","Hsd3b7","Htra1","Hyal1","Hyal2","Ifrd1","Igfbp4","Igfbp5","Igfbp7","Igfbpl1","Inhba","Ino80","Limk1","Map1b","Map2k5","Megf…
GO:0007584	4	response to nutrient	57	270	32.6555	1.72779e-05	0.000187488	["Abca1","Acp5","Acsl4","Acsl5","Adipor2","Aldh1a2","Arg1","Arg2","Arsa","Arsb","Ass1","Bckdha","Ccl5","Cd44","Cebpa","Cp","Cybb","Cyp1b1","Dnmt1","Dnmt3a","Egfr","Eif2ak2","Eln","Fads1","Gpx1","Gsn","Gsr","Gstt1","Hlcs","Hmbs","Hmgcl","Hp","Hsd17b3","Il1a","Il1b","Il6st","Lipg","Lrp2","Ltc4s","Map1b","Mef2c","Mmp9","Mtr","Muc5ac","Nod2","Nos2","Pdk2","Pparg","Rps6kb1","Ryr2","Suox","Tgfb1","Tgfb…
GO:0010975	6	regulation of neuron projection development	80	417	50.4346	1.77996e-05	0.000192808	["Aatk","Abl2","Anapc2","Apoe","Arhgdia","Arhgef1","Arsb","Baiap2","Braf","Cacna1a","Camk1","Camk1d","Cib1","Cobl","Cpne6","Cul7","Dguok","Draxin","Enc1","Epha4","Fat3","Fes","Fig4","Fkbp4","Fn1","Gfi1","Gorasp1","Grn","Ifrd1","Inppl1","Itm2c","Kif13b","Lif","Limk1","Lpar1","Lrp1","Lrrc4c","Lyn","Map1b","Map2k1","Map4k4","Marcks","Mbp","Mef2c","Megf8","Metrn","Mob2","Ndel1","Ndrg4","Nedd4l","Neu1…
GO:0031397	10	negative regulation of protein ubiquitination	34	134	16.2068	1.78328e-05	0.000192827	["Anapc10","Anapc11","Anapc2","Arrb1","Atm","Gbp4","Gtpbp4","Hfe","Isg15","Klhl40","Limk1","Mad2l1bp","N4bp1","Otub1","Psen2","Psma2","Psma3","Psma4","Psma5","Psma6","Psmb4","Psmb7","Psmc1","Psmc2","Psmc4","Psmc6","Psmd1","Psmd10","Psmd12","Psmd5","Psmd7","Sufu","Tpr","Ubxn1"]
GO:1903037	7	regulation of leukocyte cell-cell adhesion	60	289	34.9534	1.79207e-05	0.000192866	["Adam8","Adora2a","Ass1","Bmi1","Casp3","Cblb","Ccl5","Cd274","Cd28","Cd300a","Cd44","Cd55","Coro1a","Csk","Ctla2a","D930015E06Rik","Dusp3","Ebi3","Fadd","Flot2","Gsn","Icam1","Il12a","Il12b","Il18","Il1b","Il1rl2","Il20rb","Il23a","Il27","Il6","Il6st","Itga4","Itgal","Lyn","Map3k14","Map3k8","Nck1","Nck2","Ndfip1","Nod2","Peli1","Pnp","Prdx2","Ptpn2","Sash3","Sh2d2a","Socs6","Spink5","Src","Syk…
GO:0001773	5	myeloid dendritic cell activation	12	26	3.1446	1.79308e-05	0.000192866	["Batf","Batf2","Csf2","Ltbr","Notch2","Pilrb1","Pirb","Rbpj","Relb","Tgfb1","Tgfbr2","Tnfsf9"]
GO:1901699	5	cellular response to nitrogen compound	96	523	63.2549	1.79308e-05	0.000192866	["Aanat","Acsl5","Adcy3","Adcy7","Adcy9","Ahr","Akap6","Alas1","Apobec1","Aprt","Aqp9","Arg1","Ass1","Ccl5","Cdk2","Cftr","Col16a1","Col4a1","Csk","Cyba","Cyp1b1","Dennd4c","Dnmt1","Dnmt3a","Edn1","Egfr","Egr1","Enpp1","Fbn1","Gabrb2","Glp2r","Gnb1","Gng12","Gng2","Gng7","Got1","Hck","Hdac5","Hmbs","Hnrnpd","Icam1","Igfbp5","Il18","Il1b","Irf3","Itgb3","Itpr3","Klf11","Lamtor1","Lamtor4","Lyn","M…
GO:0032774	6	RNA biosynthetic process	339	2282	275.999	1.82191e-05	0.000195624	["Aebp1","Aes","Aff1","Ahctf1","Ahr","Akna","Ang","Anp32a","Arhgap22","Arid1b","Arid5a","Arid5b","Arrb1","Ascc1","Ascc3","Atf3","Atf6b","Atg7","Atmin","BC094916","Batf","Batf2","Baz1a","Bcas3","Bcl3","Bcl9l","Bdp1","Bend6","Bmi1","Calcoco1","Cbx4","Cbx6","Cbx7","Cbx8","Cc2d1a","Cc2d1b","Ccar1","Ccdc59","Cdca7l","Cdk8","Cebpa","Chaf1b","Chek2","Cipc","Cnot7","Col4a2","Commd5","Cops2","Creb3l2","Cr…
GO:0042993	8	positive regulation of transcription factor import into nucleus	17	47	5.68447	1.82631e-05	0.000195754	["Akap6","Csf3","Hcls1","Il12b","Il18","Il1b","Il23a","Pik3r2","Ppp3ca","Rbck1","Slc9a1","Smad3","Sppl3","Tlr2","Tlr9","Tmem173","Tnf"]
GO:0051093	5	negative regulation of developmental process	159	959	115.987	1.83953e-05	0.000196826	["2900011O08Rik","Aatk","Abca1","Adamts12","Adamts7","Adgrb2","Adgrg1","Amot","Angpt2","Apoe","Arhgdia","Arhgef1","Bcl2l12","Bcl9l","Braf","C1qc","Ccl17","Ccl3","Cflar","Cib1","Clec2d","Col4a2","Ctdsp1","Cxcr3","D930015E06Rik","Dguok","Draxin","E2f1","Ecm1","Eif4e","Elf5","Enpp1","Epha4","Esrrb","Fat3","Fig4","Fkbp4","Flcn","Foxo3","Foxo4","Fzd3","Gas2l1","Gfi1","Gja1","Gorasp1","Gtf2i","Hdac5","…
GO:0071417	5	cellular response to organonitrogen compound	91	490	59.2636	1.84819e-05	0.000196982	["Aanat","Acsl5","Adcy3","Adcy7","Adcy9","Ahr","Akap6","Alas1","Apobec1","Aprt","Aqp9","Arg1","Ass1","Ccl5","Cdk2","Cftr","Col16a1","Col4a1","Csk","Cyba","Cyp1b1","Dennd4c","Dnmt1","Dnmt3a","Edn1","Egfr","Egr1","Enpp1","Fbn1","Gabrb2","Glp2r","Gnb1","Gng12","Gng2","Gng7","Got1","Hck","Hdac5","Hmbs","Hnrnpd","Icam1","Igfbp5","Il18","Il1b","Itgb3","Itpr3","Klf11","Lamtor1","Lamtor4","Lyn","Map1b","…
GO:0097305	5	response to alcohol	91	490	59.2636	1.84819e-05	0.000196982	["Aanat","Abca1","Abcc3","Acp5","Acsl5","Adcy7","Ahr","Alas1","Aldh1a2","Aldh2","Apobec1","Apoe","Arg1","Arg2","Arsa","Ass1","Atp5g1","Bak1","Bmi1","Casp3","Casp9","Cbr1","Ccl3","Ccl5","Cd38","Cdk2","Cdkn1a","Ctsb","Cxcl1","Cyp1b1","Dnmt1","Dnmt3a","Dnmt3l","Dusp1","Edn1","Egfr","Egr1","Eln","F3","Fcgr2b","Fosl2","Gk","Gpx1","Grn","Gsn","Gsr","H6pd","Hmbs","Hnrnpd","Hsd17b3","Icam1","Igfbp7","Il1…
GO:0030330	7	DNA damage response, signal transduction by p53 class mediator	26	91	11.0061	1.85062e-05	0.000196982	["Atm","Batf","Bcl3","Casp2","Cdk2","Cdkn1a","Foxo3","Ing4","Psma2","Psma3","Psma4","Psma5","Psma6","Psmb4","Psmb7","Psmc1","Psmc2","Psmc4","Psmc6","Psmd1","Psmd10","Psmd12","Psmd5","Psmd7","Rfwd2","Sp100"]
GO:0050900	3	leukocyte migration	52	240	29.0271	1.88618e-05	0.000200419	["Adam8","Angpt2","Atp1b3","B4galt1","Ccl24","Ccl3","Ccl5","Cd44","Cd84","Coro1a","Csf3r","Cxcl1","Cxcl9","Cxcr3","Cxcr4","Dock8","Edn1","F11r","Fcgr3","Flt1","Fn1","Grb7","Hck","Icam1","Il16","Il1b","Il6","Inpp5d","Itga4","Itga6","Itgal","Itgb3","Lyn","Mertk","Mitf","Mmp9","Nlrp10","Pf4","Pik3r2","Rock1","Rpl13a","Rps19","S100a8","S1pr1","Sbds","Spns2","Src","Syk","Thbd","Tnf","Trem1","Trem3"]
GO:0070304	7	positive regulation of stress-activated protein kinase signaling cascade	35	140	16.9325	1.90636e-05	0.000201863	["Crk","Dvl2","Edn1","Eif2ak2","Epha4","Fgd4","Fzd5","Gab1","Gadd45b","Gadd45g","Il1a","Il1b","Ltbr","Lyn","Map3k1","Map3k11","Map3k3","Map3k9","Mapkbp1","Mink1","Myd88","Nod1","Nod2","Nox1","Pdcd10","Pkn1","Rasgrp1","Sema4c","Stk3","Syk","Taok1","Tlr6","Tlr9","Tnf","Xdh"]
GO:1903321	9	negative regulation of protein modification by small protein conjugation or removal	35	140	16.9325	1.90636e-05	0.000201863	["Anapc10","Anapc11","Anapc2","Arrb1","Atm","Gbp4","Gtpbp4","Hfe","Hmg20b","Isg15","Klhl40","Limk1","Mad2l1bp","N4bp1","Otub1","Psen2","Psma2","Psma3","Psma4","Psma5","Psma6","Psmb4","Psmb7","Psmc1","Psmc2","Psmc4","Psmc6","Psmd1","Psmd10","Psmd12","Psmd5","Psmd7","Sufu","Tpr","Ubxn1"]
GO:0032088	6	negative regulation of NF-kappaB transcription factor activity	21	66	7.98245	1.94809e-05	0.000205927	["Arrb1","Cdk5rap3","Cmklr1","Cyp1b1","Gfi1","Irak2","Irak3","Map2k5","Nlrc3","Nlrp3","Nod2","Peli1","Pkhd1","Prdx2","Psmd10","Rbck1","Siva1","Tax1bp1","Tlr9","Zc3h12a","Zcchc11"]
GO:0042102	9	positive regulation of T cell proliferation	24	81	9.79664	1.97227e-05	0.000208123	["Bmi1","Ccl5","Cd274","Cd28","Cd55","Coro1a","Ebi3","Fadd","Il12a","Il12b","Il18","Il1b","Il23a","Il6","Il6st","Itgal","Nck1","Nck2","Pnp","Sash3","Syk","Tnfsf4","Tnfsf9","Vcam1"]
GO:0010638	6	positive regulation of organelle organization	112	633	76.5589	2.0358e-05	0.000214458	["1810022K09Rik","Adamts7","Alpk1","Amot","Anapc11","Arhgef10l","Arid5a","Arl2","Arpc4","Arrb1","Baiap2","Bak1","Bcas3","Bmf","Boc","Braf","Brk1","Capg","Ccl24","Cd28","Cd93","Cdc42ep2","Cdc42ep3","Chaf1b","Chst3","Coa3","Csf2","Csf3","Cyb5r1","Cyfip1","D430041D05Rik","Ddhd1","Dnm1l","Dnmt1","Dynll2","E2f1","Edn1","Eif2s1","Eva1b","Fes","Fhod1","Fzd5","Gda","Gsn","Hck","Hcls1","Htra2","Icam1","Il…
GO:0034405	4	response to fluid shear stress	16	43	5.20069	2.12658e-05	0.000223637	["Abca1","Ass1","Car2","F3","Gja1","Hdac5","Map2k5","Mef2c","Mtss1","Nfe2l2","P2rx7","Pdgfrb","Pkd1","Serpine1","Src","Tgfb1"]
GO:0051438	6	regulation of ubiquitin-protein transferase activity	32	124	14.9973	2.15479e-05	0.000226169	["Anapc10","Anapc11","Anapc2","Arrdc4","Atm","Bmi1","Cdk2","Cul1","Limk1","Mad2l1bp","Pink1","Psen2","Psma2","Psma3","Psma4","Psma5","Psma6","Psmb4","Psmb7","Psmc1","Psmc2","Psmc4","Psmc6","Psmd1","Psmd10","Psmd12","Psmd5","Psmd7","Stub1","Tpr","Ube2n","Zer1"]
GO:0032147	9	activation of protein kinase activity	61	297	35.921	2.15803e-05	0.000226169	["Adam8","Adcy3","Adcy7","Adcy9","Adora2b","Ang","Arrb1","Braf","Crk","Cxcr4","Egfr","Eif2ak2","Erp29","F2r","Fgd4","Flt1","Fpr1","Gab1","Gadd45b","Gadd45g","Il1b","Irak2","Itgb3","Jak2","Lpar1","Map2k1","Map2k5","Map3k1","Map3k11","Map3k14","Map3k3","Map3k8","Map3k9","Map4k4","Mapkbp1","Mink1","Nod1","Nod2","Nrg1","Nrg3","P2rx7","Pdgfc","Pink1","Pkn1","Prdx2","Prkacb","Pxn","S1pr2","Src","Stk10"…
GO:2000058	9	regulation of protein ubiquitination involved in ubiquitin-dependent protein catabolic process	27	97	11.7318	2.16745e-05	0.000226769	["Anapc10","Anapc11","Anapc2","Ccdc22","Cdk5rap3","Cul1","Fbxo22","Hfe","Psen2","Psma2","Psma3","Psma4","Psma5","Psma6","Psmb4","Psmb7","Psmc1","Psmc2","Psmc4","Psmc6","Psmd1","Psmd10","Psmd12","Psmd5","Psmd7","Sufu","Sumo3"]
GO:0008654	5	phospholipid biosynthetic process	49	223	26.971	2.19592e-05	0.000229355	["Acsl5","Agpat1","Agpat2","Agpat5","Atm","Cdipt","Cds2","Cept1","Cpne6","Dolpp1","Dpm2","Dpm3","Fads1","Fig4","Ggps1","Gpaa1","Gpd1l","Hexb","Inpp5d","Inppl1","Lpcat2","Mppe1","Mtm1","Mtmr3","Mvk","Pcyt1a","Pi4kb","Pigh","Pigq","Pigs","Pigt","Pigyl","Pigz","Pik3c2a","Pik3r2","Pik3r4","Pik3r5","Pik3r6","Pip4k2a","Pld2","Pld3","Pld4","Serinc5","Sh3glb1","Slc27a1","Slc44a1","Sphk2","Sptlc2","Synj2"]
GO:0043281	8	regulation of cysteine-type endopeptidase activity involved in apoptotic process	50	230	27.8176	2.46088e-05	0.000256593	["0610009O20Rik","Adora2a","Arrb1","Bak1","Bcl2l12","Casp1","Casp2","Casp3","Casp4","Casp7","Casp9","Cd44","Cflar","Ctsc","Dapk1","Dnajb6","Epha7","F2r","F3","Fadd","Gpx1","Gsn","Hip1","Htra2","Il6","Ints1","Jak2","Map2k5","Mical1","Mkl1","Mmp9","Naip2","Ndufa13","Nlrc4","Nlrp1b","Nlrp3","Nod1","Plaur","Pparg","Prdx5","Rest","Rffl","S100a8","Slc11a2","Smad3","Src","Tnf","Tnfsf10","Tnfsf15","Xdh"]
GO:0032872	7	regulation of stress-activated MAPK cascade	45	200	24.1892	2.51645e-05	0.000260581	["Ambp","Crk","Dusp3","Dvl2","Edn1","Eif2ak2","Epha4","Fgd4","Fzd5","Gab1","Gadd45b","Gadd45g","Il1a","Il1b","Ltbr","Map2k1","Map3k1","Map3k11","Map3k3","Map3k9","Map4k4","Mapkbp1","Mecom","Mink1","Myd88","Nbr1","Nod1","Nod2","Nox1","Pdcd10","Pdcd4","Pink1","Pkn1","Ppef2","Rap2a","Rasgrp1","Sema4c","Sh3rf3","Stk3","Syk","Taok1","Tlr6","Tlr9","Tnf","Xdh"]
GO:0002479	7	antigen processing and presentation of exogenous peptide antigen via MHC class I, TAP-dependent	21	67	8.10339	2.51652e-05	0.000260581	["B2m","Cyba","Cybb","Itgb5","Ncf4","Psma2","Psma3","Psma4","Psma5","Psma6","Psmb4","Psmb7","Psmc1","Psmc2","Psmc4","Psmc6","Psmd1","Psmd10","Psmd12","Psmd5","Psmd7"]
GO:1900076	5	regulation of cellular response to insulin stimulus	21	67	8.10339	2.51652e-05	0.000260581	["Cish","Enpp1","Il1b","Inppl1","Marcks","Ncoa5","Nucb2","Osbpl8","Pid1","Pik3r2","Pparg","Prkcd","Ptpn2","Ptpre","Repin1","Rnasel","Rps6kb1","Serpina12","Socs3","Src","Tsc2"]
GO:0016054	5	organic acid catabolic process	46	206	24.9149	2.52038e-05	0.000260581	["Abcd1","Abhd12","Acaa2","Acads","Acot2","Acot7","Acox3","Aldh1l1","Aldh4a1","Amdhd2","Arg1","Arg2","Bckdha","Bckdk","Cpt1a","Crat","Crot","Dbt","Ddah2","Decr1","Dld","Dtd1","Ech1","Ethe1","Gcdh","Glul","Got1","Gpt2","Hadh","Hdc","Hibch","Hmgcl","Ivd","Mccc2","Nagk","Nos2","Pccb","Pcyox1","Pdpr","Pla2g15","Qdpr","Renbp","Slc25a10","Sqrdl","Suox","Tdh"]
GO:0046395	6	carboxylic acid catabolic process	46	206	24.9149	2.52038e-05	0.000260581	["Abcd1","Abhd12","Acaa2","Acads","Acot2","Acot7","Acox3","Aldh1l1","Aldh4a1","Amdhd2","Arg1","Arg2","Bckdha","Bckdk","Cpt1a","Crat","Crot","Dbt","Ddah2","Decr1","Dld","Dtd1","Ech1","Ethe1","Gcdh","Glul","Got1","Gpt2","Hadh","Hdc","Hibch","Hmgcl","Ivd","Mccc2","Nagk","Nos2","Pccb","Pcyox1","Pdpr","Pla2g15","Qdpr","Renbp","Slc25a10","Sqrdl","Suox","Tdh"]
GO:0072401	6	signal transduction involved in DNA integrity checkpoint	22	72	8.70813	2.54337e-05	0.000262074	["Atm","Casp2","Cdk2","Cdkn1a","Chek2","Psma2","Psma3","Psma4","Psma5","Psma6","Psmb4","Psmb7","Psmc1","Psmc2","Psmc4","Psmc6","Psmd1","Psmd10","Psmd12","Psmd5","Psmd7","Rfwd2"]
GO:0072422	7	signal transduction involved in DNA damage checkpoint	22	72	8.70813	2.54337e-05	0.000262074	["Atm","Casp2","Cdk2","Cdkn1a","Chek2","Psma2","Psma3","Psma4","Psma5","Psma6","Psmb4","Psmb7","Psmc1","Psmc2","Psmc4","Psmc6","Psmd1","Psmd10","Psmd12","Psmd5","Psmd7","Rfwd2"]
GO:0023014	4	signal transduction by protein phosphorylation	54	255	30.8413	2.59328e-05	0.000266769	["Acvr1b","Acvr2a","Adora2b","Arhgef6","Braf","Ccl3","Ccl5","Dok1","Dusp3","Dusp7","Egfr","Erbb4","Fgf12","Flt1","Ikbke","Il18","Il1b","Irak2","Kdr","Lyn","Map2k1","Map2k5","Map3k1","Map3k11","Map3k14","Map3k3","Map3k8","Map3k9","Map4k4","Mapk6","Mapk8","Mef2c","Mink1","Myd88","Ndst1","Nod1","Nod2","Nrg1","Numa1","Pebp1","Ppp4c","Rapgef2","Rasgrp3","Sh2d3c","Stk10","Stk3","Syk","Tab2","Taok1","Tg…
GO:1903533	8	regulation of protein targeting	60	293	35.4372	2.7511e-05	0.00028253	["Akap6","Bambi","Bcl3","Ccdc22","Cdkn1a","Cemip","Cib1","Csf3","Cyb5r1","Egfr","Erbb4","Fam89b","Fzd5","Gbp4","Hcls1","Hnf4a","Htra2","Hyal2","Il12b","Il18","Il1b","Il23a","Il6","Jak2","Kat2a","Kcnn3","Nfkbie","Nlrp3","Npepps","Nrg1","Parp1","Pik3r2","Pink1","Pkd1","Pkig","Plagl2","Ppp3ca","Psmb7","Psmd10","Rbck1","Rbpms","Rhou","Sh3glb1","Slc9a1","Smad3","Sppl3","Stard7","Sufu","Tgfb1","Tgfbr1"…
GO:0051340	5	regulation of ligase activity	33	131	15.844	2.75658e-05	0.000282619	["Anapc10","Anapc11","Anapc2","Arrdc4","Atm","Bmi1","Cdk2","Cul1","Limk1","Mad2l1bp","Mid1ip1","Pink1","Psen2","Psma2","Psma3","Psma4","Psma5","Psma6","Psmb4","Psmb7","Psmc1","Psmc2","Psmc4","Psmc6","Psmd1","Psmd10","Psmd12","Psmd5","Psmd7","Stub1","Tpr","Ube2n","Zer1"]
GO:0002685	5	regulation of leukocyte migration	36	148	17.9	2.76727e-05	0.000283241	["Adam17","Adam8","C5ar2","Camk1d","Ccl24","Ccl3","Ccl5","Cd300a","Cmklr1","Cxcl1","Cxcl9","Cxcr3","Ecm1","Edn1","Fadd","Icam1","Il1a","Il1b","Il23a","Il6","Itga4","Itgb3","Kitl","Lyn","Mmp9","Mtus1","Nod2","Padi2","Pf4","Ptprj","Serpine1","Stk10","Tlr2","Tnf","Tnfsf4","Vegfb"]
GO:0009615	4	response to virus	50	231	27.9386	2.77738e-05	0.000283802	["Ap1s1","Apobec1","Atg7","Bcl3","Ccl5","Cd40","Cxcl9","Cxcr4","Dclk1","Ddx1","Ddx21","Ddx60","Duox2","Eif2ak2","Eno1","Exosc5","Fadd","Gbp3","Hmga1","Hmga2","Hyal1","Hyal2","Ifih1","Ifnar2","Il12a","Il12b","Il23a","Il6","Irak3","Irf3","Irf5","Isg15","Ivns1abp","Lcn2","Mef2c","Myd88","Nlrp3","Polr3d","Psma2","Rnasel","Src","Tbk1","Tlr13","Tlr9","Tmem173","Tnf","Tnfsf4","Trim11","Xpr1","Zbp1"]
GO:2000379	7	positive regulation of reactive oxygen species metabolic process	26	93	11.248	2.81125e-05	0.000286784	["Akr1c18","Ass1","Cdkn1a","Cxcl1","Cyba","Cyp1b1","Ddah2","Edn1","Egfr","Icam1","Il18","Il1b","Il6","Jak2","Nfe2l2","Nox1","Pdgfrb","Pid1","Prkcd","Ptx3","Tgfb1","Tgfbr2","Tlr2","Tnf","Xdh","Zc3h12a"]
GO:0009259	6	ribonucleotide metabolic process	55	262	31.6879	2.83944e-05	0.00028918	["Acot7","Adcy3","Adcy7","Adcy9","Adm","Adora2a","Adssl1","Aprt","Atp2b2","Atp5d","Atp5g1","Atp6v0a1","Atp6v1a","Calcrl","Chchd10","Coasy","Crot","Dcakd","Dhodh","Eno1","Eno1b","Enpp1","Gucy2e","Guk1","Hk2","Hk3","Hspa8","Mccc2","Mlycd","Msh2","Myh6","Myh8","Nme3","Nme4","Pank1","Pde10a","Pde11a","Pde3b","Pde4a","Pfkfb2","Pfkfb3","Pfkfb4","Pfkm","Pnp","Prkag2","Prps2","Rhoq","Slc25a13","Slc35b2",…
GO:0009100	5	glycoprotein metabolic process	25	88	10.6433	2.95753e-05	0.000300706	["Adamts12","B3gat3","B4galt1","Cant1","Chst14","Col11a1","Ext1","Ext2","Extl3","Fbxo6","Gcnt1","Hpse","Hs6st1","Il1b","Man1c1","Manba","Ndst1","Ndst2","Ndst3","Ngly1","Phlda1","St6galnac6","Sulf2","Tnip1","Xylt1"]
GO:0010506	7	regulation of autophagy	57	275	33.2602	3.00958e-05	0.000305492	["1810022K09Rik","Abl2","Adamts7","Alpk1","Atg7","Boc","Casp1","Cd93","Chaf1b","Chst3","D430041D05Rik","Dapk1","Dnm1l","Dram1","Eif2s1","Eva1b","Fzd5","Htra2","Iigp1","Kat2a","Krcc1","Larp1","Map2k1","Mtdh","Myh11","Mylk","Ndufb9","Npc1","Nthl1","Pafah1b2","Pik3r2","Pink1","Pnpo","Qsox1","Rab1b","Rnf5","Rragd","Sh3bp4","Sh3glb1","Snrpb","Tbc1d14","Tlk2","Tlr9","Tmem150b","Tmem59","Trem1","Trim13"…
GO:0006977	8	DNA damage response, signal transduction by p53 class mediator resulting in cell cycle arrest	21	68	8.22434	3.22929e-05	0.000326834	["Atm","Casp2","Cdk2","Cdkn1a","Psma2","Psma3","Psma4","Psma5","Psma6","Psmb4","Psmb7","Psmc1","Psmc2","Psmc4","Psmc6","Psmd1","Psmd10","Psmd12","Psmd5","Psmd7","Rfwd2"]
GO:0045955	8	negative regulation of calcium ion-dependent exocytosis	7	10	1.20946	3.23049e-05	0.000326834	["Notch1","Ppp3ca","Rap1b","Rest","Stxbp3","Syt4","Trim9"]
GO:0045637	6	regulation of myeloid cell differentiation	44	196	23.7055	3.26242e-05	0.000329521	["Acvr1b","Acvr2a","Adam8","C1qc","Car2","Ccl3","Ccl5","Cib1","Clec2d","Csf2","Csf3","Csf3r","Ctnnbip1","Fadd","Fes","Foxo3","Gas2l1","Hcls1","Il12b","Il23a","Inhba","Inpp5d","Isg15","Itgb3","Kitl","Klf13","Ldb1","Lif","Lmo2","Lyn","Mafb","Mef2c","Mitf","Ndfip1","Notch2","Pf4","Pilrb1","Ptpn2","Rab7b","Smap1","Tmem64","Tnf","Zbtb16","Zfpm1"]
GO:1903362	7	regulation of cellular protein catabolic process	61	301	36.4048	3.27698e-05	0.000330447	["Anapc10","Anapc11","Anapc2","Apoe","Atm","Atraid","Bag6","Ccdc22","Cdk5rap3","Cebpa","Csnk1e","Ctsc","Cul1","Ezr","Fbxl5","Fbxo22","Gipc1","Gna12","Gpx1","Hfe","Hspbp1","Klhl40","Mad2l1bp","N4bp1","Ophn1","Pink1","Pkd1","Plk3","Psen2","Psma2","Psma3","Psma4","Psma5","Psma6","Psmb4","Psmb7","Psmc1","Psmc2","Psmc4","Psmc6","Psmd1","Psmd10","Psmd12","Psmd5","Psmd7","Rad23a","Rfwd2","Ric1","Stub1",…
GO:0051351	6	positive regulation of ligase activity	26	94	11.3689	3.44356e-05	0.000346397	["Anapc10","Anapc11","Anapc2","Arrdc4","Bmi1","Cul1","Mid1ip1","Pink1","Psma2","Psma3","Psma4","Psma5","Psma6","Psmb4","Psmb7","Psmc1","Psmc2","Psmc4","Psmc6","Psmd1","Psmd10","Psmd12","Psmd5","Psmd7","Stub1","Ube2n"]
GO:0050878	4	regulation of body fluid levels	109	620	74.9866	3.44645e-05	0.000346397	["Abca12","Abcc4","Adcy3","Adcy7","Adcy9","Adora2a","Angpt2","Aprt","Arrb1","Atp1b3","Atp2b2","Calu","Cd44","Cd84","Cdk2","Cftr","Crk","Csk","Dagla","Daglb","Ddr1","Dgkd","Dgkh","Dgkz","Dhodh","Dock8","Dtnbp1","Edn1","Ehd1","Enpp4","Entpd1","Erbb4","F10","F11r","F2r","F3","Fn1","Gna12","Gnb1","Gng2","Grb7","H3f3a","Habp4","Heg1","Hk2","Hmg20b","Hnf4a","Hps1","Hps6","Hyal2","Inpp5d","Itga4","Itga6…
GO:0019216	6	regulation of lipid metabolic process	62	308	37.2514	3.50157e-05	0.000350577	["Acsl4","Acsl5","Adora2b","Akr1c18","Angptl4","Apoe","Bscl2","Cdk8","Cpt1a","Dhcr7","Dld","Erbb4","Flt1","Gfi1","Hcar2","Hnf4a","Idh1","Igfbp7","Il1a","Il1b","Lamtor1","Ldlrap1","Lmf1","Lsr","Lyn","Mid1ip1","Mlycd","Mvk","Nfkb1","Nod2","Nr1d2","Nr1h2","Nr3c1","Nucb2","Pde3b","Pdgfa","Pdgfrb","Pdk2","Pdp1","Pdpr","Pik3r2","Pik3r4","Pik3r5","Pik3r6","Pparg","Ppp2r5a","Prkag2","Prkcd","Psap","Rest"…
GO:0006486	4	protein glycosylation	59	289	34.9534	3.5052e-05	0.000350577	["Adamts7","Adamtsl1","Alg10b","Alg11","B3gat3","B3gnt3","B3gnt8","B4galt1","B4galt4","B4galt6","B4gat1","Cmas","Ctsa","Dolpp1","Dpm2","Dpm3","Edem1","Ext1","Ext2","Fut8","Galnt12","Gcnt1","Gcnt2","Gcnt3","Gfpt2","Gorasp1","Lmf1","Lrp2","Man1c1","Man2a2","Mgat1","Mgat4a","Mgat4b","Mgat5","Mlec","Muc5ac","Nagpa","Neu1","Npc1","Nus1","Parp1","Pmm1","Pomk","Pomt2","Serp1","Slc17a5","Slc35c2","St3gal…
GO:0043413	6	macromolecule glycosylation	59	289	34.9534	3.5052e-05	0.000350577	["Adamts7","Adamtsl1","Alg10b","Alg11","B3gat3","B3gnt3","B3gnt8","B4galt1","B4galt4","B4galt6","B4gat1","Cmas","Ctsa","Dolpp1","Dpm2","Dpm3","Edem1","Ext1","Ext2","Fut8","Galnt12","Gcnt1","Gcnt2","Gcnt3","Gfpt2","Gorasp1","Lmf1","Lrp2","Man1c1","Man2a2","Mgat1","Mgat4a","Mgat4b","Mgat5","Mlec","Muc5ac","Nagpa","Neu1","Npc1","Nus1","Parp1","Pmm1","Pomk","Pomt2","Serp1","Slc17a5","Slc35c2","St3gal…
GO:0030097	5	hemopoiesis	32	127	15.3602	3.60243e-05	0.000359715	["Ahctf1","Ahr","Angpt2","Bmi1","Cd164","Ebp","Flcn","Glrx5","Hhex","Kdr","Kitl","Klf11","Lmo2","Lyl1","Lyn","Mknk2","Notch2","Pdgfrb","Rbpj","Rogdi","Rpa1","Sgpl1","Sh2b3","Stk3","Tet2","Tgfbr2","Tiparp","Ttc7","Txnrd2","Zbtb16","Zfp36l2","Zfpm1"]
GO:0051443	7	positive regulation of ubiquitin-protein transferase activity	25	89	10.7642	3.64505e-05	0.000362789	["Anapc10","Anapc11","Anapc2","Arrdc4","Bmi1","Cul1","Pink1","Psma2","Psma3","Psma4","Psma5","Psma6","Psmb4","Psmb7","Psmc1","Psmc2","Psmc4","Psmc6","Psmd1","Psmd10","Psmd12","Psmd5","Psmd7","Stub1","Ube2n"]
GO:0071158	7	positive regulation of cell cycle arrest	25	89	10.7642	3.64505e-05	0.000362789	["Atm","Casp2","Cdk2","Cdkn1a","Hmga2","Med25","Psma2","Psma3","Psma4","Psma5","Psma6","Psmb4","Psmb7","Psmc1","Psmc2","Psmc4","Psmc6","Psmd1","Psmd10","Psmd12","Psmd5","Psmd7","Rfwd2","Tgfb1","Uhrf2"]
GO:0009063	5	cellular amino acid catabolic process	30	116	14.0298	3.67593e-05	0.00036527	["Abhd12","Aldh1l1","Aldh4a1","Arg1","Arg2","Bckdha","Bckdk","Dbt","Ddah2","Dld","Dtd1","Ethe1","Gcdh","Glul","Got1","Gpt2","Hdc","Hibch","Hmgcl","Ivd","Mccc2","Nos2","Pccb","Pcyox1","Pdpr","Qdpr","Slc25a10","Sqrdl","Suox","Tdh"]
GO:0046578	8	regulation of Ras protein signal transduction	43	191	23.1007	3.70971e-05	0.00036803	["Abca1","Abl2","Adgrg1","Adra1a","Als2cl","Apoe","Arfgef3","Arhgap24","Arhgef1","Arhgef10l","Arhgef3","Arhgef6","Arhgef7","Arrb1","Crk","Dgkz","Dnmbp","F2r","Fbxo8","Fgd2","Fgd4","Fgd6","Flcn","Icmt","Itsn1","Kctd13","Kitl","Lpar1","Map2k1","Notch2","Nrg1","Pdcd10","Plekhg1","Plekhg3","Prex2","Rasa2","Rasa3","Rasgef1a","Rasgrf1","Rasgrp1","Spata13","Spry1","Timp2"]
GO:0006006	7	glucose metabolic process	36	150	18.1419	3.76127e-05	0.000372542	["Atf3","Cacna1a","Cpt1a","Eno1","G6pc2","Gaa","Galm","Ganc","Gbe1","Got1","Gpd2","Gys1","H6pd","Hk2","Hk3","Igfbp5","Inppl1","Lrp5","Pck2","Pdk2","Pfkfb2","Pfkfb3","Pfkfb4","Pfkm","Phka2","Prkacb","Pygb","Serp1","Serpina12","Slc25a10","Slc25a11","Slc25a13","Sord","Tcf7l2","Tnf","Usf1"]
GO:0006935	4	chemotaxis	56	271	32.7764	3.84522e-05	0.000380242	["Abcc1","Adam8","Amot","C5ar2","Ccl17","Ccl24","Ccl3","Ccl5","Ccr9","Ccrl2","Cmklr1","Cmtm3","Cmtm7","Coro1a","Csf3r","Cxcl1","Cxcl9","Cxcr3","Cxcr4","Cysltr1","Edn1","Elmo2","Epha7","Fcgr3","Fes","Flt1","Fpr1","Fpr2","Il16","Il1b","Il6","Itgb3","Map2k1","Nrp1","Nrp2","Pdgfa","Pdgfrb","Pf4","Pik3c2a","Plaur","Ptprj","Ralbp1","Rhog","Robo2","Robo3","Rpl13a","Rps19","S100a8","S1pr1","Sbds","Syk","…
GO:0016311	6	dephosphorylation	55	265	32.0507	3.95573e-05	0.00039054	["Acp5","Ctdsp1","Ctdsp2","Ctdspl2","Dusp1","Dusp16","Dusp2","Dusp3","Dusp7","Eya4","Fig4","G6pc2","Impa2","Inpp1","Inpp5b","Inpp5d","Inppl1","Lhpp","Map2k1","Mdp1","Mtm1","Mtmr3","Nceh1","Nck1","Nt5c1a","Ntpcr","Pdp1","Pfkfb2","Pfkfb3","Pfkfb4","Phpt1","Pnkp","Ppef2","Ppm1n","Ppp1r12a","Ppp1r15b","Ppp3ca","Ppp3cc","Ppp4c","Ptp4a1","Ptpn12","Ptpn18","Ptpn2","Ptpra","Ptprb","Ptpre","Ptprg","Ptprj"…
GO:0071548	6	response to dexamethasone	19	59	7.13583	3.96836e-05	0.000391158	["Arg1","Arg2","Ass1","Bmi1","Casp9","Cyp1b1","Edn1","Egfr","Eln","Hmbs","Il1b","Il6","Jak2","Nos2","Nr3c1","Plat","Serpine1","Tgfb1","Txn1"]
GO:0045597	6	positive regulation of cell differentiation	150	909	109.94	4.02375e-05	0.000395981	["Abl2","Acvr1b","Acvr2a","Adam8","Adm","Akap6","Anapc2","Apoe","Arhgdia","Arhgef7","Arsb","Atraid","B4galt1","Baiap2","Bambi","Bcl9l","Bend6","Bmi1","Boc","Braf","Brinp1","Brinp3","Camk1","Camk1d","Car2","Ccl3","Ccl5","Cebpa","Cib1","Cmklr1","Cobl","Commd5","Cpne6","Csf2","Csf3","Ctnnbip1","Cul7","Cxcl9","Cxcr4","Edn1","Ehd1","Enc1","Epha4","Fadd","Fbn2","Fes","Fig4","Flt1","Fn1","Foxo3","Fzd3",…
GO:0032874	8	positive regulation of stress-activated MAPK cascade	34	139	16.8115	4.03663e-05	0.000396611	["Crk","Dvl2","Edn1","Eif2ak2","Epha4","Fgd4","Fzd5","Gab1","Gadd45b","Gadd45g","Il1a","Il1b","Ltbr","Map3k1","Map3k11","Map3k3","Map3k9","Mapkbp1","Mink1","Myd88","Nod1","Nod2","Nox1","Pdcd10","Pkn1","Rasgrp1","Sema4c","Stk3","Syk","Taok1","Tlr6","Tlr9","Tnf","Xdh"]
GO:0048661	7	positive regulation of smooth muscle cell proliferation	22	74	8.95002	4.0739e-05	0.000399633	["Abcc4","Calcrl","Ccl5","Cyba","Edn1","Egfr","Fgfr2","Flt1","Il18","Il6","Il6ra","Itgb3","Myd88","Nampt","Notch3","Nox1","Pdgfrb","Rbpj","Rps6kb1","S1pr1","Tgfbr2","Tnf"]
GO:0072431	9	signal transduction involved in mitotic G1 DNA damage checkpoint	21	69	8.34529	4.11749e-05	0.000402621	["Atm","Casp2","Cdk2","Cdkn1a","Psma2","Psma3","Psma4","Psma5","Psma6","Psmb4","Psmb7","Psmc1","Psmc2","Psmc4","Psmc6","Psmd1","Psmd10","Psmd12","Psmd5","Psmd7","Rfwd2"]
GO:1902400	8	intracellular signal transduction involved in G1 DNA damage checkpoint	21	69	8.34529	4.11749e-05	0.000402621	["Atm","Casp2","Cdk2","Cdkn1a","Psma2","Psma3","Psma4","Psma5","Psma6","Psmb4","Psmb7","Psmc1","Psmc2","Psmc4","Psmc6","Psmd1","Psmd10","Psmd12","Psmd5","Psmd7","Rfwd2"]
GO:0033273	5	response to vitamin	35	145	17.5372	4.21659e-05	0.000410351	["Acp5","Aldh1a2","Arg1","Arg2","Ccl5","Cd44","Cebpa","Dnmt1","Dnmt3a","Egfr","Eif2ak2","Eln","Fads1","Gpx1","Gsn","Gsr","Gstt1","Hlcs","Hmbs","Hp","Hsd17b3","Il1a","Il1b","Lrp2","Ltc4s","Map1b","Mef2c","Mmp9","Muc5ac","Nos2","Pparg","Tgfb1","Tnc","Tpcn2","Tyr"]
GO:0030522	6	intracellular receptor signaling pathway	42	186	22.496	4.21662e-05	0.000410351	["Ahr","Aldh1a2","Calcoco1","Casp1","Dcbld2","Esrrb","Fkbp4","Flt1","Glmp","Hnf4a","Ifih1","Irak2","Irf3","Jak2","Med16","Med24","Mefv","Ncoa3","Nlrc4","Nlrp3","Nod1","Nod2","Nos2","Notch2","Nr1d2","Nr1h2","Nr3c1","P2rx7","Padi2","Pim1","Pparg","Ptges3","Rbm14","Rnf14","Rxrb","Sla2","Sp100","Src","Stat3","Tab2","Taf7","Ube2n"]
GO:0097193	7	intrinsic apoptotic signaling pathway	42	186	22.496	4.21662e-05	0.000410351	["Atm","Bag6","Bak1","Bcl2a1b","Bcl3","Bmf","Casp2","Casp3","Casp4","Casp7","Casp9","Cdkn1a","Chek2","Cul1","Cyp1b1","Ddx5","Dynll2","E2f1","E2f2","Fnip2","Gpx1","Htra2","Ier3","Ifi204","Ikbke","Jak2","Jmy","Mapk8","Mllt11","Msh2","Nupr1","Pdcd10","Pdk2","Pnp","Ppp3cc","Prkcd","Shisa5","Siva1","Tnf","Tnfrsf1b","Ube2k","Zfp385b"]
GO:0042330	3	taxis	56	272	32.8974	4.28123e-05	0.000415979	["Abcc1","Adam8","Amot","C5ar2","Ccl17","Ccl24","Ccl3","Ccl5","Ccr9","Ccrl2","Cmklr1","Cmtm3","Cmtm7","Coro1a","Csf3r","Cxcl1","Cxcl9","Cxcr3","Cxcr4","Cysltr1","Edn1","Elmo2","Epha7","Fcgr3","Fes","Flt1","Fpr1","Fpr2","Il16","Il1b","Il6","Itgb3","Map2k1","Nrp1","Nrp2","Pdgfa","Pdgfrb","Pf4","Pik3c2a","Plaur","Ptprj","Ralbp1","Rhog","Robo2","Robo3","Rpl13a","Rps19","S100a8","S1pr1","Sbds","Syk","…
GO:0090087	6	regulation of peptide transport	59	291	35.1953	4.31399e-05	0.000418498	["Abcc8","Arhgef7","Arl2","Arrb1","Bcl3","Cacna1a","Car2","Ccdc22","Ccl5","Cd38","Cftr","Cpt1a","G6pc2","Gja1","Glul","Hadh","Hmga2","Hnf4a","Ica1","Il12b","Il18","Il1b","Il23a","Itpr3","Jak2","Kcns3","Lif","Lrp5","Map4k4","Marcks","Mcu","Midn","Nlrp3","Nos2","Nucb2","Pck2","Pde3b","Pfkfb2","Pfkm","Phpt1","Pparg","Ppp3ca","Prkacb","Psmd10","Rapgef4","Rbck1","Rest","S100a8","Serp1","Sidt2","Slc2a1…
GO:2000116	8	regulation of cysteine-type endopeptidase activity	51	241	29.148	4.36459e-05	0.000422738	["0610009O20Rik","Adora2a","Arrb1","Bak1","Bcl2l12","Casp1","Casp2","Casp3","Casp4","Casp7","Casp9","Cd44","Cflar","Ctsc","Dapk1","Dnajb6","Epha7","F2r","F3","Fadd","Gpx1","Gsn","Hip1","Htra2","Il6","Ints1","Jak2","Map2k5","Mefv","Mical1","Mkl1","Mmp9","Naip2","Ndufa13","Nlrc4","Nlrp1b","Nlrp3","Nod1","Plaur","Pparg","Prdx5","Rest","Rffl","S100a8","Slc11a2","Smad3","Src","Tnf","Tnfsf10","Tnfsf15"…
GO:0042770	6	signal transduction in response to DNA damage	28	106	12.8203	4.37437e-05	0.000423017	["Atm","Batf","Bcl3","Casp2","Casp9","Cdk2","Cdkn1a","Chek2","Foxo3","Ing4","Psma2","Psma3","Psma4","Psma5","Psma6","Psmb4","Psmb7","Psmc1","Psmc2","Psmc4","Psmc6","Psmd1","Psmd10","Psmd12","Psmd5","Psmd7","Rfwd2","Sp100"]
GO:0055065	8	metal ion homeostasis	91	501	60.594	4.39961e-05	0.000424788	["Abl2","Adm","Adra1a","Aplp2","Apoe","Atox1","Atp1a2","Atp1a3","Atp1b3","Atp2b2","Atp2c1","Atp6v0a1","Atp6v0d2","Atp6v1a","Atp6v1e1","B2m","Bak1","Cacna1a","Ccdc22","Ccl3","Ccl5","Ccr9","Cd38","Cd40","Cd55","Cnnm2","Cp","Cxcl1","Cxcr3","Cxcr4","Cysltr1","Edn1","Egfr","F2r","Fbxl5","Fth1","Ftl1","Gja1","Gnb1","Gtf2i","Heph","Hexb","Hfe","Hyal2","Il1b","Il6st","Itgb3","Itpr3","Jak2","Kcnj2","Kdr",…
GO:0007162	6	negative regulation of cell adhesion	50	235	28.4224	4.45414e-05	0.000429377	["Abl2","Acp5","Adam15","Adam8","Adamts18","Adora2a","Angpt2","Arhgdia","Ass1","Bcas3","Casp3","Cblb","Cd164","Cd274","Cd300a","Cyp1b1","D930015E06Rik","Dscaml1","Dusp3","Gcnt2","Gtpbp4","Il20rb","Jak2","Lamb1","Lpxn","Map2k1","Map2k5","Myadm","Myo1f","Ndfip1","Nf2","Notch1","Pde3b","Peli1","Prdx2","Prkcd","Ptpn2","Rcc2","Rnd1","Serpine1","Socs6","Src","Srcin1","Tgfb1","Tnc","Tnfaip8l2","Tnfrsf21…
GO:0043687	7	post-translational protein modification	62	311	37.6143	4.72442e-05	0.000454716	["Adamts7","Adamtsl1","Alg10b","Alg11","Arsa","Arsb","Atg7","B3gnt3","B3gnt8","B4galt1","B4galt4","B4galt6","Bmi1","Cbx4","Cbx8","Cmas","Ctsa","Dolpp1","Dpm2","Dpm3","Edem1","F10","Fut8","Galnt12","Gcnt1","Gcnt3","Gfpt2","Gpaa1","Icmt","Man1c1","Man2a2","Mgat1","Mgat4a","Mgat4b","Mgat5","Mlec","Muc5ac","Neu1","Nup54","Nupl1","Parp1","Pigh","Pigq","Pigs","Pigt","Plaur","Pmm1","Ranbp2","Ring1","Rpa…
GO:1902807	8	negative regulation of cell cycle G1/S phase transition	29	112	13.546	4.80316e-05	0.000461571	["Atm","Casp2","Cdk2","Cdkn1a","Ctdsp1","Ctdsp2","Dgkz","Kank2","Nacc2","Plk3","Psma2","Psma3","Psma4","Psma5","Psma6","Psmb4","Psmb7","Psmc1","Psmc2","Psmc4","Psmc6","Psmd1","Psmd10","Psmd12","Psmd5","Psmd7","Rfwd2","Susd2","Zc3h12d"]
GO:0040007	2	growth	80	429	51.8859	4.97642e-05	0.000477472	["Adam15","Adm","Adra1a","Ahr","Apba2","Arid5b","Cacna1a","Cadm1","Cela1","Cflar","Cobl","Ctc1","Cyfip1","Dclk1","Ddx5","Dgkd","Dhcr7","Duox2","Edn1","Emp3","Erbb4","Fgfr2","Foxo3","Gja1","Gpd2","Gpx1","Gsn","Heg1","Hhex","Icmt","Ifrd1","Igfbp5","Igsf10","Il6","Il6ra","Inhba","Ints1","Itgb3","Kat2a","Kdr","Lamtor1","Map1b","Mfsd7b","Mtpn","Naca","Ncoa3","Ndel1","Ndrg4","Notch1","Notch2","Notch3",…
GO:0030512	8	negative regulation of transforming growth factor beta receptor signaling pathway	22	75	9.07096	5.11256e-05	0.000489003	["Adam17","Bambi","Bcl9l","Fam89b","Fbn1","Fbn2","Htra1","Mecom","Nedd4l","Onecut2","Peg10","Ski","Skil","Skor1","Smad3","Snx25","Snx6","Stub1","Tdgf1","Tgfb1","Tgfbr1","Tgfbr2"]
GO:1903845	7	negative regulation of cellular response to transforming growth factor beta stimulus	22	75	9.07096	5.11256e-05	0.000489003	["Adam17","Bambi","Bcl9l","Fam89b","Fbn1","Fbn2","Htra1","Mecom","Nedd4l","Onecut2","Peg10","Ski","Skil","Skor1","Smad3","Snx25","Snx6","Stub1","Tdgf1","Tgfb1","Tgfbr1","Tgfbr2"]
GO:0050863	7	regulation of T cell activation	57	280	33.8649	5.12115e-05	0.000489062	["Adam8","Adora2a","Bmi1","Casp3","Cblb","Ccl5","Cd274","Cd28","Cd300a","Cd55","Coro1a","Csk","Ctla2a","D930015E06Rik","Dusp3","Ebi3","Fadd","Flot2","Gsn","Icam1","Il12a","Il12b","Il18","Il1b","Il1rl2","Il20rb","Il23a","Il27","Il6","Il6st","Itgal","Lyn","Map3k14","Map3k8","Nck1","Nck2","Ndfip1","Nod2","Peli1","Pnp","Prdx2","Ptpn2","Sash3","Sh2d2a","Socs6","Spink5","Src","Syk","Tgfb1","Tgfbr2","Tn…
GO:0009617	4	response to bacterium	55	268	32.4136	5.46291e-05	0.000520426	["Acp5","Adam17","Adamts4","Anxa3","Baiap2","Bcl3","Casp1","Ccl5","Erap1","Fau","Fcgr2b","Gbp3","Gbp4","Gbp7","Gpx1","Hck","Hist1h2bj","Hp","Iigp1","Il12a","Il12b","Il23a","Il27","Il6","Irf3","Irf8","Isg15","Lcn2","Mecom","Mr1","Myd88","Myo1f","Naip2","Nfkb1","Nlrc4","Nlrp10","Nod1","Nod2","Nos2","Notch2","Optn","P2rx7","Prkcd","Rbpj","Rnf5","S100a8","Serpine1","Socs3","Stab1","Syk","Tbk1","Tlr2"…
GO:0032649	6	regulation of interferon-gamma production	25	91	11.0061	5.46655e-05	0.000520426	["Abl2","Bcl3","Cd274","Ebi3","Fadd","Fzd5","Il12a","Il12b","Il18","Il1b","Il1f5","Il20rb","Il23a","Il27","Inhba","Irf8","Isg15","Nod2","Rasgrp1","Sash3","Tlr9","Tnf","Tnfsf4","Tnfsf9","Zfpm1"]
GO:0051250	7	negative regulation of lymphocyte activation	31	124	14.9973	5.56074e-05	0.000528572	["Adora2a","Atm","Casp3","Cblb","Cd274","Cd300a","D930015E06Rik","Dusp3","Fcgr2b","Il20rb","Inhba","Inpp5d","Lyn","Mertk","Ndfip1","Peli1","Pkn1","Prdm1","Prdx2","Ptpn2","Samsn1","Sla2","Socs6","Sox11","Tgfb1","Thoc1","Tnfaip8l2","Tnfrsf13b","Tnfrsf21","Tnfsf4","Zc3h12d"]
GO:0000096	5	sulfur amino acid metabolic process	16	46	5.56352	5.57346e-05	0.000528902	["Adi1","Ahcyl2","Bhmt","Cacna1a","Ethe1","Got1","Mpst","Mri1","Msra","Mthfd1","Mthfd2l","Mtr","Pcyox1","Slc25a10","Sqrdl","Suox"]
GO:0045646	5	regulation of erythrocyte differentiation	14	37	4.47501	5.58146e-05	0.000528902	["Acvr1b","Acvr2a","Foxo3","Gas2l1","Inhba","Inpp5d","Isg15","Klf13","Ldb1","Lmo2","Lyn","Mafb","Smap1","Zfpm1"]
GO:0048545	5	response to steroid hormone	103	586	70.8745	5.64777e-05	0.000534359	["Aanat","Abca2","Abcc3","Acads","Adm","Ahr","Akr1c18","Aldh1a2","Aldh2","Anxa3","Arg1","Arg2","Arsa","Arsb","Ass1","Atp1a2","Atp1a3","Bcas3","Bckdha","Bmi1","C1qb","Car2","Casp3","Casp9","Cbr1","Ccl5","Cd38","Cdk2","Cdkn1a","Cebpa","Cftr","Ctsl","Cxcl1","Cyp1b1","Dnmt1","Dnmt3a","Dusp1","Edn1","Egfr","Egr1","Eln","Erbb4","F3","Fcgr2b","Fn1","Fosl2","Got1","Gpx1","Grn","Hmbs","Hnrnpd","Hp","Hsd17…
GO:0030258	5	lipid modification	35	147	17.7791	5.70448e-05	0.000538893	["Abcd1","Acaa2","Acads","Acox3","Adipor2","Atm","Cerk","Cpt1a","Crat","Crot","Decr1","Dgkz","Ech1","Gcdh","Hadh","Impa2","Inpp1","Inpp5b","Inpp5d","Inppl1","Ip6k1","Ivd","Mlycd","Mtm1","Mtmr3","Pccb","Pi4kb","Pik3c2a","Pik3r2","Pik3r6","Pip4k2a","Pparg","Soat1","Sphk2","Synj2"]
GO:2000060	10	positive regulation of protein ubiquitination involved in ubiquitin-dependent protein catabolic process	24	86	10.4014	5.80931e-05	0.000547952	["Anapc10","Anapc11","Anapc2","Ccdc22","Cdk5rap3","Cul1","Fbxo22","Psma2","Psma3","Psma4","Psma5","Psma6","Psmb4","Psmb7","Psmc1","Psmc2","Psmc4","Psmc6","Psmd1","Psmd10","Psmd12","Psmd5","Psmd7","Sumo3"]
GO:0046486	5	glycerolipid metabolic process	64	326	39.4285	5.8188e-05	0.000548004	["Abhd12","Acsl4","Acsl5","Agpat1","Agpat2","Agpat5","Ang","Apoe","Atm","Cdipt","Cds2","Cept1","Cpne6","Cpt1a","Dagla","Dgkd","Dgkh","Dpm2","Dpm3","Fig4","Gk","Gpaa1","Gpd1l","Gpx1","Hsd17b12","Il6st","Impa2","Inpp1","Inpp5b","Inpp5d","Inppl1","Ip6k1","Lpcat2","Mppe1","Mtm1","Mtmr3","Pcyt1a","Pdgfrb","Pi4kb","Pigh","Pigq","Pigs","Pigt","Pigyl","Pigz","Pik3c2a","Pik3r2","Pik3r4","Pik3r5","Pik3r6",…
GO:0006875	8	cellular metal ion homeostasis	80	431	52.1278	5.86242e-05	0.000551265	["Abl2","Adm","Adra1a","Aplp2","Apoe","Atox1","Atp1a2","Atp1a3","Atp1b3","Atp2b2","Atp2c1","Atp6v0a1","Atp6v0d2","Atp6v1a","Atp6v1e1","Bak1","Cacna1a","Ccdc22","Ccl3","Ccl5","Ccr9","Cd38","Cd40","Cd55","Cp","Cxcl1","Cxcr3","Cxcr4","Cysltr1","Edn1","F2r","Fth1","Ftl1","Gja1","Gnb1","Gtf2i","Heph","Hexb","Hfe","Il1b","Il6st","Itgb3","Itpr3","Jak2","Kcnj2","Kdr","Lcn2","Lpar1","Mcoln1","Mcu","Mt2","…
GO:0070486	6	leukocyte aggregation	52	250	30.2365	5.96165e-05	0.000559738	["Abl2","Adam17","B2m","Batf","Bcl3","Braf","Cadm1","Cblb","Cd151","Cd28","Cd44","Coro1a","Cxcr4","Dock8","Egr1","Fadd","Fcgr4","Fzd5","Gadd45g","Hs1bp3","Icam1","Il12b","Il1b","Il23a","Il6","Itgal","Jmjd6","Kif13b","Lcp1","Mafb","Mpzl2","Nck1","Nck2","Nlrc3","P2rx7","Patz1","Ppp3ca","Prdx2","Psen2","Ptpn2","Relb","S100a8","Sema4a","Sla2","Smad3","Stk10","Stx11","Tcf3","Tgfb1","Tnfsf4","Zfp36l1",…
GO:0051052	6	regulation of DNA metabolic process	61	307	37.1305	5.98184e-05	0.000560774	["Acd","Anxa3","Babam1","Casp3","Cbx8","Cd28","Cd40","Cdan1","Cdk2","Cdkn1a","Cdt1","Chek2","Csf2","Ctc1","Cyp1b1","Dna2","Dnajc2","Dnmt1","Dnmt3a","Dusp1","Egfr","Flcn","Gja1","Gtpbp4","Hmga2","Id3","Ier3","Il6","Ino80","Inppl1","Kcnk2","Kctd13","Kitl","Mapk8","Msh2","Msh3","Ndfip1","Nf2","Npas2","Otub1","Parp1","Pcna","Pdgfa","Pdgfc","Pdgfrb","Pid1","Pinx1","Pnp","Pparg","Ppp4c","Ppp4r2","Rps3"…
GO:0051251	7	positive regulation of lymphocyte activation	51	244	29.5109	6.12008e-05	0.000572858	["Adam8","Bmi1","Bst1","Ccl5","Cd274","Cd28","Cd38","Cd40","Cd55","Cdkn1a","Coro1a","Csk","Ebi3","Fadd","Flot2","Gpr183","Hps1","Il12a","Il12b","Il13ra1","Il18","Il1b","Il1rl2","Il23a","Il6","Il6st","Inpp5d","Itgal","Lyn","Map3k14","Map3k8","Mef2c","Myd88","Nck1","Nck2","Nfatc2","Nod2","Peli1","Pnp","Prdm1","Sash3","Src","Syk","Tcf3","Tgfb1","Tgfbr2","Tnfsf13","Tnfsf4","Tnfsf9","Vcam1","Zbtb16"]
GO:0042035	6	regulation of cytokine biosynthetic process	28	108	13.0622	6.27798e-05	0.000586743	["Bcl3","Cd28","Ebi3","Fcgr3","Igf2bp1","Igf2bp2","Il12b","Il1a","Il1b","Il27","Il6","Inhba","Inpp5d","Irf3","Map2k5","Myd88","Nfkb1","Nmi","Rel","Syk","Tbk1","Tlr1","Tlr2","Tlr6","Tlr9","Tnf","Tnfrsf8","Zfpm1"]
GO:0098609	4	cell-cell adhesion	111	643	77.7684	6.40632e-05	0.000597826	["Abl2","Adam15","Adam17","Adam8","Astn1","Atp2c1","B2m","Batf","Bcl3","Boc","Braf","Cadm1","Cblb","Ccl5","Cd151","Cd164","Cd28","Cd44","Cd84","Cd93","Cdh12","Cdhr2","Cercam","Col19a1","Coro1a","Csrp1","Cxcr4","Cyp1b1","Dnajb6","Dock8","Dscaml1","Egfr","Egr1","Elmo2","Erf","Ezr","Fadd","Fat1","Fat2","Fat3","Fat4","Fblim1","Fcgr4","Fibp","Fndc3a","Fzd5","Gadd45g","Gcnt1","Hs1bp3","Icam1","Il12b","…
GO:0032660	6	regulation of interleukin-17 production	10	21	2.53987	6.53929e-05	0.000609307	["Il12a","Il12b","Il18","Il1f5","Il23a","Myd88","Nod2","Tgfb1","Tlr2","Tnfsf4"]
GO:1903557	7	positive regulation of tumor necrosis factor superfamily cytokine production	19	61	7.37772	6.64371e-05	0.000618097	["Adam8","Ccl3","Cyba","Fadd","Fcgr3","Il12b","Il18","Il23a","Jak2","Myd88","Nod1","Nod2","Pf4","Rasgrp1","Sash3","Tlr1","Tlr2","Tlr9","Tnfrsf8"]
GO:0046427	8	positive regulation of JAK-STAT cascade	20	66	7.98245	6.66885e-05	0.000619496	["Ccl5","Cd40","Csf2","Cyp1b1","Erbb4","F2r","Hcls1","Il12a","Il12b","Il18","Il19","Il23a","Il6","Il6ra","Il6st","Jak2","Lif","Lyn","Notch1","Osm"]
GO:0050820	6	positive regulation of coagulation	12	29	3.50744	6.79503e-05	0.000630262	["Enpp4","F2r","F3","Hpse","Nfe2l2","Plek","Prdx2","Psen2","Ptprj","Serpine1","Thbd","Usf1"]
GO:0090263	8	positive regulation of canonical Wnt signaling pathway	32	131	15.844	6.89406e-05	0.000638482	["Bambi","Csnk1a1","Csnk1e","Csnk1g2","Dvl2","Fgfr2","Frat2","Fzd5","Lgr6","Lrp5","Nfkb1","Psma2","Psma3","Psma4","Psma5","Psma6","Psmb4","Psmb7","Psmc1","Psmc2","Psmc4","Psmc6","Psmd1","Psmd10","Psmd12","Psmd5","Psmd7","Rbpj","Rnf220","Smad3","Src","Wls"]
GO:0006470	7	protein dephosphorylation	37	160	19.3514	6.90991e-05	0.000638985	["Ctdsp1","Ctdsp2","Ctdspl2","Dusp1","Dusp16","Dusp2","Dusp3","Dusp7","Eya4","Lhpp","Map2k1","Mdp1","Mtm1","Mtmr3","Nceh1","Nck1","Pdp1","Phpt1","Ppef2","Ppp1r12a","Ppp1r15b","Ppp3ca","Ptp4a1","Ptpn12","Ptpn18","Ptpn2","Ptpra","Ptprb","Ptpre","Ptprg","Ptprj","Ptprq","Ptprs","Ptprt","Ptpru","Smek1","Styx"]
GO:0032731	8	positive regulation of interleukin-1 beta production	11	25	3.02365	6.9572e-05	0.000642389	["Casp1","Casp4","Ccl3","Il18","Jak2","Nlrp3","Nod1","Nod2","P2rx7","Smad3","Trim16"]
GO:0050867	6	positive regulation of cell activation	57	283	34.2278	6.96926e-05	0.000642534	["Adam8","Adora2b","Bmi1","Bst1","Ccl5","Cd274","Cd28","Cd300lb","Cd38","Cd40","Cd55","Cdkn1a","Coro1a","Csk","Ebi3","Fadd","Flot2","Gpr183","Hps1","Il12a","Il12b","Il13ra1","Il18","Il1b","Il1rl2","Il23a","Il6","Il6st","Inpp5d","Itgal","Jak2","Lyn","Map3k14","Map3k8","Mef2c","Myd88","Nck1","Nck2","Nfatc2","Nod2","Peli1","Pld2","Plek","Pnp","Prdm1","Ptprj","Sash3","Src","Syk","Tcf3","Tgfb1","Tgfbr…
GO:0051495	7	positive regulation of cytoskeleton organization	38	166	20.0771	7.00487e-05	0.000644551	["Amot","Arhgef10l","Arl2","Arpc4","Baiap2","Bcas3","Braf","Brk1","Ccl24","Cdc42ep2","Cdc42ep3","Csf3","Cyfip1","Edn1","Fes","Fhod1","Gda","Gsn","Hck","Hcls1","Icam1","Jmy","Limk1","Map1b","Map3k1","Mapk8","Mtss1","Nck1","Nck2","Nf2","P2rx7","Plek","Rcc2","Rgs2","Sdc4","Smad3","Tenm1","Vasp"]
GO:0070102	8	interleukin-6-mediated signaling pathway	6	8	0.967569	7.01216e-05	0.000644551	["Gab1","Il6","Il6ra","Il6st","Stat3","Zcchc11"]
GO:1901987	7	regulation of cell cycle phase transition	56	277	33.5021	7.22403e-05	0.000663032	["Anapc10","Anapc11","Anapc2","Atm","Casp2","Ccnb3","Cdk2","Cdk5rap3","Cdkn1a","Chek2","Ctc1","Ctdsp1","Ctdsp2","Ddb1","Dgkz","E2f1","Foxn3","Foxo4","Hmga2","Ier3","Ino80","Kank2","Mad2l1bp","Nacc2","Ovol1","Pid1","Plk3","Plk5","Psma2","Psma3","Psma4","Psma5","Psma6","Psmb4","Psmb7","Psmc1","Psmc2","Psmc4","Psmc6","Psmd1","Psmd10","Psmd12","Psmd5","Psmd7","Rcc2","Rfwd2","Sox11","Susd2","Tcf3","Tg…
GO:0048589	3	developmental growth	65	335	40.517	7.36968e-05	0.000675389	["Adam15","Adm","Adra1a","Ahr","Apba2","Arid5b","Cadm1","Cela1","Cflar","Cobl","Ctc1","Cyfip1","Dclk1","Dhcr7","Duox2","Erbb4","Fgfr2","Foxo3","Gja1","Gpd2","Gpx1","Gsn","Heg1","Hhex","Icmt","Ifrd1","Igfbp5","Igsf10","Ints1","Kat2a","Kdr","Map1b","Mfsd7b","Mtpn","Naca","Ncoa3","Ndel1","Notch1","Notch2","Notch3","Nrp1","Nrp2","Plaur","Psap","Ptpn12","Rpl29","S1pr1","Selm","Sepn1","Serpine1","Sik3"…
GO:2000181	6	negative regulation of blood vessel morphogenesis	23	82	9.91759	7.54248e-05	0.000690193	["Adgrb2","Amot","Angpt2","Col4a2","Cxcr3","Flcn","Foxo4","Gtf2i","Hdac5","Hhex","Krit1","Lif","Map2k5","Notch1","Pdcd10","Pde3b","Pf4","Rock1","Sema4a","Serpine1","Spink5","Stab1","Xdh"]
GO:0009150	7	purine ribonucleotide metabolic process	51	246	29.7528	7.62637e-05	0.00069683	["Acot7","Adcy3","Adcy7","Adcy9","Adm","Adora2a","Adssl1","Aprt","Atp2b2","Atp5d","Atp5g1","Atp6v0a1","Atp6v1a","Calcrl","Chchd10","Coasy","Crot","Dcakd","Eno1","Eno1b","Enpp1","Gucy2e","Guk1","Hk2","Hk3","Hspa8","Mccc2","Mlycd","Msh2","Myh6","Myh8","Nme3","Nme4","Pank1","Pde10a","Pde11a","Pde3b","Pde4a","Pfkfb2","Pfkfb3","Pfkfb4","Pfkm","Pnp","Prkag2","Prps2","Rhoq","Slc25a13","Slc35b2","Tgfb1",…
GO:2000045	8	regulation of G1/S transition of mitotic cell cycle	35	149	18.021	7.65337e-05	0.000698256	["Atm","Casp2","Cdk2","Cdkn1a","Ctdsp1","Ctdsp2","Dgkz","E2f1","Ino80","Kank2","Nacc2","Pid1","Plk3","Plk5","Psma2","Psma3","Psma4","Psma5","Psma6","Psmb4","Psmb7","Psmc1","Psmc2","Psmc4","Psmc6","Psmd1","Psmd10","Psmd12","Psmd5","Psmd7","Rfwd2","Tcf3","Tjp3","Ube2e2","Zc3h12d"]
GO:0002478	5	antigen processing and presentation of exogenous peptide antigen	36	155	18.7467	7.81792e-05	0.000711153	["Abcb5","Actr1b","Ap1b1","Ap1s1","Ap1s3","Ap2a1","B2m","Ctsd","Ctsf","Ctsl","Cyba","Cybb","Dynll2","Fcgr2b","Fcgr3","Ifi30","Itgb5","Kif2a","Kif3c","Ncf4","Psma2","Psma3","Psma4","Psma5","Psma6","Psmb4","Psmb7","Psmc1","Psmc2","Psmc4","Psmc6","Psmd1","Psmd10","Psmd12","Psmd5","Psmd7"]
GO:1902806	8	regulation of cell cycle G1/S phase transition	36	155	18.7467	7.81792e-05	0.000711153	["Atm","Casp2","Cdk2","Cdkn1a","Ctdsp1","Ctdsp2","Dgkz","E2f1","Ino80","Kank2","Nacc2","Pid1","Plk3","Plk5","Psma2","Psma3","Psma4","Psma5","Psma6","Psmb4","Psmb7","Psmc1","Psmc2","Psmc4","Psmc6","Psmd1","Psmd10","Psmd12","Psmd5","Psmd7","Rfwd2","Susd2","Tcf3","Tjp3","Ube2e2","Zc3h12d"]
GO:0061299	4	retina vasculature morphogenesis in camera-type eye	7	11	1.33041	7.95108e-05	0.000722194	["Col4a1","Cyp1b1","Lama1","Lrp5","Nrp1","Rhoj","Slc4a7"]
GO:0055076	9	transition metal ion homeostasis	32	132	15.9649	8.05888e-05	0.000730903	["Aplp2","Atox1","Atp2c1","Atp6v0a1","Atp6v0d2","Atp6v1a","Atp6v1e1","B2m","Ccdc22","Cp","Fbxl5","Fth1","Ftl1","Heph","Hfe","Hyal2","Lcn2","Mcoln1","Mt2","Ndfip1","Sfxn3","Sfxn5","Slc11a2","Slc25a37","Slc31a1","Slc31a2","Slc39a14","Slc46a1","Steap3","Steap4","Tfr2","Ttc7"]
GO:1901991	8	negative regulation of mitotic cell cycle phase transition	39	173	20.9237	8.07517e-05	0.000731298	["Anapc10","Anapc11","Anapc2","Atm","Casp2","Cdk2","Cdk5rap3","Cdkn1a","Ctdsp1","Ctdsp2","Dgkz","Foxn3","Foxo4","Hmga2","Ier3","Kank2","Mad2l1bp","Nacc2","Plk3","Psma2","Psma3","Psma4","Psma5","Psma6","Psmb4","Psmb7","Psmc1","Psmc2","Psmc4","Psmc6","Psmd1","Psmd10","Psmd12","Psmd5","Psmd7","Rfwd2","Tpr","Tpra1","Zc3h12d"]
GO:0034109	5	homotypic cell-cell adhesion	60	304	36.7676	8.33689e-05	0.000753886	["Abl2","Adam17","B2m","Batf","Bcl3","Braf","Cadm1","Cblb","Cd151","Cd28","Cd44","Coro1a","Csrp1","Cxcr4","Dock8","Egr1","Fadd","Fcgr4","Fibp","Fzd5","Gadd45g","Hs1bp3","Icam1","Il12b","Il1b","Il23a","Il6","Itgal","Itgb3","Jmjd6","Kif13b","Lcp1","Mafb","Megf11","Mpzl2","Nck1","Nck2","Nlrc3","P2rx7","Patz1","Plek","Ppp3ca","Prdx2","Psen2","Ptpn2","Ptpru","Relb","S100a8","Sema4a","Sla2","Smad3","St…
GO:0042246	4	tissue regeneration	18	57	6.89393	8.39455e-05	0.000757982	["Adam15","Cflar","Erbb4","Gja1","Gpx1","Gsn","Ifrd1","Igsf10","Mtpn","Naca","Notch1","Notch2","Notch3","Plaur","Ptpn12","Sepn1","Serpine1","Vwf"]
GO:0032729	7	positive regulation of interferon-gamma production	19	62	7.49866	8.50258e-05	0.000766607	["Abl2","Bcl3","Ebi3","Fadd","Fzd5","Il12a","Il12b","Il18","Il1b","Il23a","Il27","Irf8","Rasgrp1","Sash3","Tlr9","Tnf","Tnfsf4","Tnfsf9","Zfpm1"]
GO:1903050	8	regulation of proteolysis involved in cellular protein catabolic process	57	285	34.4697	8.52109e-05	0.000767148	["Anapc10","Anapc11","Anapc2","Atm","Atraid","Bag6","Ccdc22","Cdk5rap3","Cebpa","Csnk1e","Ctsc","Cul1","Fbxo22","Gipc1","Gna12","Gpx1","Hfe","Hspbp1","Klhl40","Mad2l1bp","N4bp1","Ophn1","Pink1","Pkd1","Plk3","Psen2","Psma2","Psma3","Psma4","Psma5","Psma6","Psmb4","Psmb7","Psmc1","Psmc2","Psmc4","Psmc6","Psmd1","Psmd10","Psmd12","Psmd5","Psmd7","Rad23a","Rfwd2","Stub1","Sufu","Sumo3","Tlk2","Tpr",…
GO:0046883	5	regulation of hormone secretion	59	298	36.042	8.68696e-05	0.000780935	["Abcc8","Acvr2a","Arhgef7","Arl2","Arrb1","Cacna1a","Ccl5","Cd38","Cftr","Cpt1a","Edn1","G6pc2","Gja1","Glul","Hadh","Hcar2","Hmga2","Hnf4a","Ica1","Il1b","Il6","Il6st","Inhba","Itpr3","Jak2","Kcns3","Lif","Lrp5","Map4k4","Marcks","Mcu","Midn","Nos2","Nucb2","Osm","P2ry1","Pck2","Pde3b","Pfkfb2","Pfkm","Phpt1","Pparg","Ppp3ca","Prkacb","Ptgs1","Rab11fip5","Rapgef4","Rest","Serp1","Sidt2","Slc2a1…
GO:0006650	6	glycerophospholipid metabolic process	50	241	29.148	8.74661e-05	0.000785146	["Abhd12","Agpat1","Agpat2","Agpat5","Atm","Cdipt","Cds2","Cept1","Cpne6","Dpm2","Dpm3","Fig4","Gpaa1","Gpd1l","Impa2","Inpp1","Inpp5b","Inpp5d","Inppl1","Ip6k1","Lpcat2","Mppe1","Mtm1","Mtmr3","Pcyt1a","Pdgfrb","Pi4kb","Pigh","Pigq","Pigs","Pigt","Pigyl","Pigz","Pik3c2a","Pik3r2","Pik3r4","Pik3r5","Pik3r6","Pip4k2a","Pla2g15","Pld2","Pld3","Pld4","Plek","Pnpla6","Serinc5","Sh3glb1","Slc27a1","Sl…
GO:1990267	4	response to transition metal nanoparticle	35	150	18.1419	8.83792e-05	0.00079205	["Aanat","Abcc8","Acp5","Apobec1","Aqp9","Arg1","Arg2","Arsa","Arsb","Ass1","Atp13a2","Atp5d","Car2","Cp","D2hgdh","Egfr","Eln","Fn1","Hmbs","Hp","Icam1","Il1a","Khk","Mbp","Mmp9","Nfkb1","Nr3c1","P2rx7","S100a8","Slc11a2","Slc31a1","Sord","Tnf","Urod","Vcam1"]
GO:0038179	7	neurotrophin signaling pathway	56	279	33.744	8.84936e-05	0.00079205	["Adam17","Adcy3","Adcy7","Adcy9","Adora2a","Ago3","Ago4","Akt1s1","Ap2a1","Arhgdia","Arhgef1","Arhgef3","Arhgef6","Arhgef7","Braf","Casp2","Casp3","Casp9","Cd28","Cdkn1a","Coro1a","Crk","Dusp3","Dusp7","Egfr","Erbb4","Fgd2","Fgd4","Fgfr2","Foxo3","Foxo4","Gab1","Itpr3","Itsn1","Maged1","Map2k1","Map2k5","Mapk8","Mef2c","Myd88","Nfkb1","Nrg1","Pcsk5","Pdgfa","Pdgfrb","Pik3r2","Prkacb","Prkcd","Ps…
GO:0090288	6	negative regulation of cellular response to growth factor stimulus	28	110	13.3041	8.8965e-05	0.000793951	["Adam17","Adamts12","Bambi","Bcl9l","Fam89b","Fbn1","Fbn2","Hhex","Htra1","Mecom","Nedd4l","Onecut2","Peg10","Ski","Skil","Skor1","Smad3","Snx25","Snx6","Spry1","Stub1","Sulf2","Tcf7l2","Tdgf1","Tgfb1","Tgfbr1","Tgfbr2","Xdh"]
GO:2000134	9	negative regulation of G1/S transition of mitotic cell cycle	28	110	13.3041	8.8965e-05	0.000793951	["Atm","Casp2","Cdk2","Cdkn1a","Ctdsp1","Ctdsp2","Dgkz","Kank2","Nacc2","Plk3","Psma2","Psma3","Psma4","Psma5","Psma6","Psmb4","Psmb7","Psmc1","Psmc2","Psmc4","Psmc6","Psmd1","Psmd10","Psmd12","Psmd5","Psmd7","Rfwd2","Zc3h12d"]
GO:0045785	6	positive regulation of cell adhesion	70	370	44.7501	9.04892e-05	0.00080638	["Adam8","Adgrg1","Arhgef7","Arl2","Bmi1","Braf","Ccl5","Cd274","Cd28","Cd44","Cd55","Cib1","Col16a1","Coro1a","Csk","Ebi3","Emilin1","Fadd","Fbln2","Flcn","Flot2","Fn1","Gcnt2","Hsd17b12","Hyal1","Il12a","Il12b","Il18","Il1b","Il1rl2","Il23a","Il6","Il6st","Itga4","Itga6","Itgal","Itgb3","Jak2","Kdr","Ldb1","Lyn","Map3k14","Map3k8","Myadm","Myo10","Nck1","Nck2","Nid1","Nod2","Nrg1","Piezo1","Pik…
GO:0002755	8	MyD88-dependent toll-like receptor signaling pathway	23	83	10.0385	9.25239e-05	0.000823315	["Dusp3","Dusp7","Irak2","Irak3","Map2k1","Map3k1","Mapk8","Mef2c","Myd88","Nfkb1","Nfkb2","Nod1","Nod2","Peli1","Peli2","Tab2","Tlr1","Tlr13","Tlr2","Tlr6","Tlr9","Tnip1","Ube2n"]
GO:0046488	7	phosphatidylinositol metabolic process	32	133	16.0858	9.39819e-05	0.000835077	["Atm","Cdipt","Dpm2","Dpm3","Fig4","Gpaa1","Impa2","Inpp1","Inpp5b","Inpp5d","Inppl1","Ip6k1","Mppe1","Mtm1","Mtmr3","Pdgfrb","Pi4kb","Pigh","Pigq","Pigs","Pigt","Pigyl","Pigz","Pik3c2a","Pik3r2","Pik3r4","Pik3r5","Pik3r6","Pip4k2a","Plek","Slc27a1","Synj2"]
GO:0010564	6	regulation of cell cycle process	94	532	64.3434	9.60631e-05	0.000852334	["Aldh4a1","Anapc10","Anapc11","Anapc2","Atm","Casp2","Ccnb3","Cd28","Cdk2","Cdk5rap3","Cdkn1a","Cdt1","Cep131","Chek2","Chordc1","Ctc1","Ctdsp1","Ctdsp2","Cul7","Cul9","Ddb1","Dgkz","Dusp1","E2f1","Edn1","Fgfr2","Flcn","Foxn3","Foxo4","Gipc1","Git1","Hmga2","Hmgn5","Ier3","Il1a","Il1b","Ino80","Kank2","Klhl21","Lif","Lrp5","Mad2l1bp","Med25","Msh2","Nacc2","Osm","Ovol1","Pdgfrb","Pebp1","Pid1","…
GO:0043433	5	negative regulation of sequence-specific DNA binding transcription factor activity	33	139	16.8115	9.72029e-05	0.000861201	["Arrb1","Cdk5rap3","Cmklr1","Ctnnbip1","Cyp1b1","Egln1","Gfi1","Hnf4a","Hr","Id3","Irak2","Irak3","Map2k5","Nlrc3","Nlrp3","Nod2","Peli1","Pim1","Pkhd1","Prdx2","Psmd10","Rbck1","Rlim","Sik1","Siva1","Sp100","Sufu","Tax1bp1","Tcf7l2","Tlr9","Tnfsf4","Zc3h12a","Zcchc11"]
GO:0042990	9	regulation of transcription factor import into nucleus	25	94	11.3689	9.74081e-05	0.000861774	["Akap6","Bcl3","Ccdc22","Csf3","Hcls1","Il12b","Il18","Il1b","Il23a","Nfkbie","Nlrp3","Pik3r2","Pkd1","Ppp3ca","Psmd10","Rbck1","Slc9a1","Smad3","Sppl3","Sufu","Tlr2","Tlr9","Tmem173","Tnf","Tonsl"]
GO:0032940	4	secretion by cell	91	512	61.9244	9.93366e-05	0.000877569	["Abca1","Abca12","Abcc4","Adm","Anxa3","Apba2","Cacna1a","Calu","Ccl3","Ccl5","Cd300a","Coro1a","Crlf2","Edn1","Erp29","Exoc3l4","Fcgr3","Fn1","Gipc1","Gnpda1","Habp4","Hck","Hps1","Hspa8","Il6","Inhba","Itgb3","Itsn1","Lat2","Lcp2","Lmf1","Lrp2","Lyn","Mertk","Milr1","Myo1f","Myo5a","Nlrc4","Nlrp3","Nod2","Notch1","Notch2","Optn","P2rx7","Pcsk5","Pdgfa","Pf4","Pik3c2a","Plek","Pnp","Pou2f2","Ps…
GO:0009311	5	oligosaccharide metabolic process	16	48	5.80542	0.000100058	0.00088198	["B4galt1","Fut8","Gaa","Ganc","Gla","Gm2a","Gnptg","Hexb","Mgat4a","Mgat4b","Mpdu1","Naga","Neu1","Slc2a1","St6galnac6","St8sia2"]
GO:0010565	6	regulation of cellular ketone metabolic process	44	205	24.794	0.000100124	0.00088198	["Acsl4","Acsl5","Akr1c18","Bhmt","Cpt1a","Dld","Hnf4a","Il6","Kat2a","Mid1ip1","Mlycd","Ncor2","Nr1h2","Nr3c1","Nucb2","Pdk2","Pdp1","Pdpr","Pparg","Prkag2","Psma2","Psma3","Psma4","Psma5","Psma6","Psmb4","Psmb7","Psmc1","Psmc2","Psmc4","Psmc6","Psmd1","Psmd10","Psmd12","Psmd5","Psmd7","Ptpn2","Ranbp2","Rest","Serpina12","Sik1","Smek1","Tcf7l2","Tysnd1"]
GO:0071214	4	cellular response to abiotic stimulus	62	319	38.5818	0.000101483	0.00089267	["Adssl1","Agap3","Arhgdia","Atm","Atp1a2","Bak1","Casp1","Casp2","Casp4","Casp9","Cd40","Cdkn1a","Ctsb","Cyba","Ddb1","Egfr","Egr1","Fadd","Gja1","Gnb1","Habp4","Hist3h2a","Hyal1","Hyal2","Il18","Il1b","Ino80","Itgb3","Kcnj2","Ltbr","Map3k1","Map3k14","Mapk8","Mme","Mtpn","Myd88","Mylk","N4bp1","Nfkb1","Nox1","Pcna","Pkd2l1","Pold1","Ppid","Rab11fip5","Rad9a","Relb","Rest","Rgs9","Rp1","Rp1 (ENS…
GO:0043409	8	negative regulation of MAPK cascade	35	151	18.2629	0.000101856	0.000894667	["Ambp","Apoe","Arrb1","Cd300a","Csk","Dag1","Dusp1","Dusp16","Dusp2","Dusp3","Dusp7","Flcn","Hyal2","Il1b","Inppl1","Irak3","Lif","Lyn","Mecom","Nf2","P2rx7","Pdcd4","Pebp1","Pink1","Ppef2","Prkcd","Psmd10","Ptpn2","Ptprj","Rgs2","Rnf149","Smpd1","Spry1","Tnip1","Tsc2"]
GO:0050679	7	positive regulation of epithelial cell proliferation	37	163	19.7142	0.000104326	0.000913951	["Ang","Arg1","B4galt1","C5ar2","Ccl24","Ccl5","Cyba","Ecm1","Egfr","Erbb4","F3","Fgfr2","Glul","Grn","Htra1","Hyal1","Il6","Itgb3","Kdr","Lamb1","Map2k5","Nod2","Notch1","Nrp1","Nrp2","Ppp1r16b","Prkd1","Rptor","Scn5a","Sox11","Tbx18","Tcf7l2","Tgfb1","Tgfbr1","Vash2","Vegfb","Zfp703"]
GO:0010035	4	response to inorganic substance	104	602	72.8096	0.000104349	0.000913951	["Aanat","Abcc8","Acp5","Adprhl2","Akr1c18","Alas1","Alox5ap","Apobec1","Aqp9","Arg1","Arg2","Ass1","Atp13a2","Atp5d","B2m","Bak1","Braf","Car2","Casp3","Casp9","Cbx8","Cdk2","Cebpa","Cp","Cyp1b1","D2hgdh","Dnmt1","Dnmt3a","Dusp1","Edn1","Egfr","Egln1","Eln","Entpd1","Entpd6","Erbb4","F3","Fn1","Ftl1","Gpx1","Gsn","Gstt1","Hmbs","Hnrnpd","Hp","Hsd17b3","Icam1","Il18","Il1a","Il1b","Il6","Itpr3","…
GO:0031398	10	positive regulation of protein ubiquitination	38	169	20.4399	0.000104833	0.000916879	["Anapc10","Anapc11","Anapc2","Arrb1","Arrdc4","Bmi1","Ccdc22","Cd300lh","Cdk5rap3","Cul1","Fbxo22","Hspbp1","Ndfip1","Nmi","Nod2","Peli1","Pink1","Psma2","Psma3","Psma4","Psma5","Psma6","Psmb4","Psmb7","Psmc1","Psmc2","Psmc4","Psmc6","Psmd1","Psmd10","Psmd12","Psmd5","Psmd7","Rassf5","Stra13","Stub1","Sumo3","Ube2n"]
GO:0050715	7	positive regulation of cytokine secretion	24	89	10.7642	0.000105257	0.000919277	["Abl2","Cadm1","Casp1","Casp4","Ccl3","Cd274","Chia1","F2r","Hyal2","Il1a","Irf3","Nlrp10","Nlrp3","Nod2","P2rx7","Rasgrp1","Scamp5","Sptbn1","Src","Syk","Tlr2","Tnf","Tnfsf15","Trim16"]
GO:0006509	7	membrane protein ectodomain proteolysis	10	22	2.66082	0.000106904	0.000930408	["Adam17","Bace2","Dag1","Erap1","P2rx7","Psen2","Psenen","Sppl2a","Sppl2b","Sppl3"]
GO:0002705	7	positive regulation of leukocyte mediated immunity	26	100	12.0946	0.000107361	0.000930408	["Adora2b","B2m","Cadm1","Cd28","Cd40","Cxcl1","Fadd","Fcgr3","Fzd5","Il12a","Il12b","Il1b","Il23a","Nod2","Nos2","P2rx7","Pld2","Pnp","Pvr","Rasgrp1","Sash3","Syk","Tgfb1","Tnf","Tnfsf13","Tnfsf4"]
GO:0006919	9	activation of cysteine-type endopeptidase activity involved in apoptotic process	26	100	12.0946	0.000107361	0.000930408	["Bak1","Casp1","Casp2","Casp3","Casp4","Casp7","Casp9","Cflar","Ctsc","F2r","F3","Fadd","Hip1","Jak2","Nlrc4","Nlrp1b","Nlrp3","Nod1","Pparg","S100a8","Slc11a2","Smad3","Tnf","Tnfsf10","Tnfsf15","Xdh"]
GO:0034142	8	toll-like receptor 4 signaling pathway	26	100	12.0946	0.000107361	0.000930408	["Dusp3","Dusp7","Fadd","Ikbke","Irak2","Irf3","Map2k1","Map3k1","Mapk8","Mef2c","Myd88","Nfkb1","Nfkb2","Nod1","Nod2","Peli1","Peli2","Tab2","Tank","Tbk1","Tlr1","Tlr2","Tlr6","Tnip3","Ube2d3","Ube2n"]
GO:0030194	7	positive regulation of blood coagulation	11	26	3.1446	0.000107442	0.000930408	["Enpp4","F2r","F3","Hpse","Nfe2l2","Plek","Prdx2","Ptprj","Serpine1","Thbd","Usf1"]
GO:1900048	6	positive regulation of hemostasis	11	26	3.1446	0.000107442	0.000930408	["Enpp4","F2r","F3","Hpse","Nfe2l2","Plek","Prdx2","Ptprj","Serpine1","Thbd","Usf1"]
GO:0006687	6	glycosphingolipid metabolic process	18	58	7.01488	0.000108078	0.000934033	["Arsa","Arsb","B4galt6","Cerk","Cln6","Ctsa","Gla","Gltp","Gm2a","Hexb","Itgb8","Naga","Neu1","Psap","Smpd1","St6galnac6","St8sia2","Ugcg"]
GO:0045017	5	glycerolipid biosynthetic process	46	218	26.3663	0.000108166	0.000934033	["Acsl4","Acsl5","Agpat1","Agpat2","Agpat5","Ang","Atm","Cdipt","Cds2","Cept1","Cpne6","Dpm2","Dpm3","Fig4","Gk","Gpaa1","Gpd1l","Hsd17b12","Inpp5d","Inppl1","Lpcat2","Mppe1","Mtm1","Mtmr3","Pcyt1a","Pi4kb","Pigh","Pigq","Pigs","Pigt","Pigyl","Pigz","Pik3c2a","Pik3r2","Pik3r4","Pik3r5","Pik3r6","Pip4k2a","Pld2","Pld3","Pld4","Sh3glb1","Slc27a1","Slc44a1","Synj2","Tecr"]
GO:0071407	6	cellular response to organic cyclic compound	76	412	49.8298	0.000108795	0.000936167	["Aanat","Abca1","Ahr","Akap6","Akr1c18","Alas1","Apoe","Aqp9","Arg1","Arg2","Arhgdia","Ass1","Atp1a2","Atp1a3","Bcas3","Bmi1","Casp3","Casp9","Ccl3","Ccl5","Cebpa","Cftr","Cyba","Cyp1b1","Edn1","Egfr","Egr1","Eln","Gabrb2","Gnb1","Gng2","Hmbs","Hnrnpd","Igfbp5","Il18","Il1b","Il6","Inhba","Irf3","Itga6","Itpr3","Jak2","Mef2c","Mgarp","Muc5ac","Naip2","Ncoa3","Nfkb1","Nod2","Nos2","Npc1","Nr3c1",…
GO:0010883	5	regulation of lipid storage	14	39	4.7169	0.000109024	0.000936167	["Abca1","Ehd1","Fto","Il6","Itgb3","Nfkb1","Nr1h2","Osbpl11","Osbpl8","Pparg","Ptpn2","Scarb1","Tnf","Zc3h12a"]
GO:0048008	9	platelet-derived growth factor receptor signaling pathway	14	39	4.7169	0.000109024	0.000936167	["Abl2","Arid5b","Gab1","Jak2","Nrp1","Pdgfa","Pdgfc","Pdgfrb","Pik3c2a","Plat","Ptprj","Sgpl1","Tiparp","Zfand5"]
GO:1900077	6	negative regulation of cellular response to insulin stimulus	14	39	4.7169	0.000109024	0.000936167	["Cish","Enpp1","Il1b","Inppl1","Ncoa5","Nucb2","Pid1","Pparg","Prkcd","Ptpn2","Ptpre","Rps6kb1","Socs3","Tsc2"]
GO:0031346	6	positive regulation of cell projection organization	62	320	38.7028	0.000111282	0.00095422	["Abl2","Anapc2","Apoe","Arhgdia","Arhgef7","Arsb","Baiap2","Bcas3","Braf","Brk1","Camk1","Camk1d","Cdc42ep2","Cdc42ep3","Cobl","Cpne6","Cul7","Enc1","Epha4","Fes","Fig4","Fn1","Fnbp1l","Grn","Kat2a","Lcn2","Lif","Limk1","Lpar1","Lyn","Map1b","Map2k1","Marcks","Megf8","Metrn","Mob2","Myo3b","Ndel1","Ndrg4","Nedd4l","Neu1","Nr3c1","Nrp1","Numb","P2rx7","P2ry2","Plk5","Plxnb2","Prkd1","Rapgef2","Rh…
GO:0009887	4	organ morphogenesis	96	548	66.2785	0.0001127	0.000965031	["Acp5","Adm","Aes","Ahr","Aldh1a2","Arid5b","Bak1","Bmi1","Braf","Car2","Cela1","Col11a1","Col11a2","Csf3r","Cul1","Cxcr4","Dgcr6","Dhrs3","Dlx3","Dscaml1","Dvl2","Egfr","Eln","Erbb4","Fat4","Fbn1","Fbn2","Fgfr2","Gaa","Gamt","Gcnt1","Gcnt3","Hhex","Htra1","Hyal1","Hyal2","Id3","Ift122","Ift140","Inhba","Itga6","Kdm2b","Lamb1","Lfng","Lif","Lrp5","Ltbp3","Map2k1","Mef2c","Megf8","Mfsd7b","Mybpc3…
GO:1901655	6	cellular response to ketone	23	84	10.1595	0.000112989	0.000966162	["Arg1","Arg2","Ass1","Bmi1","Casp9","Ccl5","Cyp1b1","Egfr","Eln","Fn1","Gnb1","Gng2","Hmbs","Il6","Jak2","Nr3c1","P2ry6","Plat","Pparg","Serpine1","Src","Tgfb1","Tnfsf4"]
GO:0050767	7	regulation of neurogenesis	120	715	86.4765	0.000113713	0.000970996	["2900011O08Rik","Aatk","Abl2","Adgrg1","Anapc2","Apoe","Arhgdia","Arhgef1","Arsb","Baiap2","Bend6","Braf","Brinp1","Brinp3","Cacna1a","Camk1","Camk1d","Ccl5","Cdk5rap3","Cib1","Cobl","Cpne6","Ctdsp1","Cul7","Cxcr4","Dguok","Draxin","Eif4e","Enc1","Epha4","Fat3","Fes","Fig4","Fkbp4","Fn1","Fzd3","Gdpd5","Gfi1","Gorasp1","Grn","Hmg20b","Hmga2","Ifrd1","Il1b","Il6","Il6st","Inppl1","Itm2c","Kdr","K…
GO:0010639	6	negative regulation of organelle organization	59	301	36.4048	0.000115824	0.000987646	["2900011O08Rik","Acaa2","Acd","Anapc10","Anapc11","Anapc2","Apobec1","Atg7","Atm","Capg","Cib1","Coro1a","Dnmt1","Eml4","Fgfr2","Fkbp4","Flcn","Gas2l1","Gpx1","Gsn","H3f3a","H3f3b","Higd1a","Hmga1","Ier3","Kank2","Lif","Mad2l1bp","Map1b","Map3k1","Mid1ip1","Msh2","Myadm","Osm","Otub1","Phf1","Pid1","Pink1","Plekhh2","Prkcd","Psmd10","Rbm14","Rp1","Rp1 (ENSMUSG00000109048)","S1pr1","Sbds","Ski","…
GO:0048771	4	tissue remodeling	25	95	11.4899	0.000117192	0.000997922	["Ahr","Angpt2","Arg1","Bak1","Capn1","Eln","Enpp1","F2r","Gja1","Igfbp5","Il1a","Il23a","Il6","Itga4","Lif","Lipa","Lrp5","Ltbp3","Mef2c","Mitf","Mmp9","Nos2","Notch2","Rbpj","Tgfb1"]
GO:0018279	6	protein N-linked glycosylation via asparagine	30	123	14.8764	0.000117891	0.00100249	["Alg10b","Alg11","B4galt1","B4galt4","B4galt6","Cmas","Ctsa","Dolpp1","Dpm2","Dpm3","Edem1","Fut8","Gfpt2","Man1c1","Man2a2","Mgat1","Mgat4a","Mgat4b","Mgat5","Mlec","Neu1","Pmm1","Slc17a5","St3gal1","St3gal3","St3gal4","St6gal1","St6galnac6","St8sia2","Syvn1"]
GO:0046328	8	regulation of JNK cascade	38	170	20.5609	0.000119507	0.00101481	["Ambp","Crk","Dusp3","Dvl2","Edn1","Epha4","Fgd4","Fzd5","Gab1","Gadd45b","Gadd45g","Il1a","Il1b","Ltbr","Map3k1","Map3k11","Map3k9","Map4k4","Mapkbp1","Mecom","Mink1","Myd88","Nod1","Nod2","Nox1","Pdcd4","Pink1","Pkn1","Ppef2","Rap2a","Rasgrp1","Sh3rf3","Stk3","Syk","Taok1","Tlr6","Tlr9","Tnf"]
GO:0030031	5	cell projection assembly	53	263	31.8088	0.000120994	0.00102602	["2700049A03Rik","Abl2","Arhgef6","Arhgef7","C2cd3","Capg","Cby1","Cc2d2a","Ccl5","Cep126","Cyfip1","Dnah5","Emp3","Ezr","Fgd2","Fgd4","Fgd6","Fnbp1l","Ift122","Ift140","Ift172","Inppl1","Itga6","Lpar1","Map4k4","Mink1","Mtss1","Mylk","Nck1","Nck2","Onecut2","Ophn1","P2rx7","Parvb","Pdgfa","Pkhd1","Pmp22","Pxn","Rap1b","Rap2a","Rap2c","Rapgef2","Rock1","Rp1","Rp1 (ENSMUSG00000109048)","S1pr1","S1…
GO:0097028	7	dendritic cell differentiation	13	35	4.23312	0.000128016	0.00108407	["Batf","Batf2","Csf2","Ltbr","Lyn","Notch2","Pirb","Rbpj","Relb","Tgfb1","Tgfbr2","Tnfsf9","Trem2"]
GO:0000209	10	protein polyubiquitination	43	201	24.3102	0.00012897	0.00109064	["Anapc10","Anapc11","Anapc2","Ap1s1","Blmh","Fbxo22","Map3k1","March1","March6","March8","Nedd4l","Npepps","Peli1","Psma2","Psma3","Psma4","Psma5","Psma6","Psmb4","Psmb7","Psmc1","Psmc2","Psmc4","Psmc6","Psmd1","Psmd10","Psmd12","Psmd5","Psmd7","Rbck1","Rffl","Rnf167","Rnf187","Rnf5","Stub1","Syvn1","Tpp2","Ube2d3","Ube2e2","Ube2k","Ube2n","Ube2q2","Znrf1"]
GO:0007173	10	epidermal growth factor receptor signaling pathway	42	195	23.5845	0.000131096	0.00110709	["Abl2","Adam12","Adam17","Adcy3","Adcy7","Adcy9","Ago3","Ago4","Akt1s1","Ap2a1","Arhgef7","Casp9","Cd28","Cdkn1a","Csk","Dgkd","Egfr","Epn1","Erbb4","Fgfr2","Foxo3","Foxo4","Gab1","Grb7","Itpr3","Map2k1","Nck2","Nrg1","Pdgfa","Pdgfrb","Pik3c2a","Pik3r2","Prkacb","Prkcd","Pxn","Reps2","Spry1","Src","Tdgf1","Tgfb1","Tnrc6b","Tsc2"]
GO:0030214	5	hyaluronan catabolic process	8	15	1.81419	0.000132489	0.00111462	["Cd44","Cemip","Gusb","Hexb","Hyal1","Hyal2","Slc9a1","Tgfb1"]
GO:0032928	8	regulation of superoxide anion generation	8	15	1.81419	0.000132489	0.00111462	["Acp5","Cxcl1","Cyba","Egfr","Il18","Prkcd","Syk","Tgfb1"]
GO:0034103	5	regulation of tissue remodeling	20	69	8.34529	0.000132532	0.00111462	["Adam8","B4galt1","Car2","Cd38","Csk","Gja1","Il12b","Il18","Il23a","Inpp5d","Itgb3","Lrp5","Ltbp3","P2rx7","S1pr1","Src","Suco","Syk","Tgfb1","Tmem64"]
GO:0019884	4	antigen processing and presentation of exogenous antigen	36	159	19.2304	0.000135605	0.0011389	["Abcb5","Actr1b","Ap1b1","Ap1s1","Ap1s3","Ap2a1","B2m","Ctsd","Ctsf","Ctsl","Cyba","Cybb","Dynll2","Fcgr2b","Fcgr3","Ifi30","Itgb5","Kif2a","Kif3c","Ncf4","Psma2","Psma3","Psma4","Psma5","Psma6","Psmb4","Psmb7","Psmc1","Psmc2","Psmc4","Psmc6","Psmd1","Psmd10","Psmd12","Psmd5","Psmd7"]
GO:0007219	7	Notch signaling pathway	37	165	19.9561	0.00013609	0.00113984	["Adam17","Ago3","Ago4","Akt1s1","Arrb1","B4galt1","Cdk8","Cebpa","Cntn6","Cul1","Dtx3","E2f1","Epn1","Got1","Hdac10","Hdac5","Hhex","Hp","Ift172","Lfng","Maml3","Mib2","Ncor2","Notch1","Notch2","Notch3","Numb","Psen2","Psenen","Rbpj","Rps19","Tbl1xr1","Tfdp2","Tgfb1","Tgfbr2","Tle1","Tnrc6b"]
GO:0030177	7	positive regulation of Wnt signaling pathway	37	165	19.9561	0.00013609	0.00113984	["Abl2","Bambi","Csnk1a1","Csnk1e","Csnk1g2","Dvl2","Fgfr2","Frat2","Fzd5","Hhex","Lgr6","Lrp5","Nfkb1","Psma2","Psma3","Psma4","Psma5","Psma6","Psmb4","Psmb7","Psmc1","Psmc2","Psmc4","Psmc6","Psmd1","Psmd10","Psmd12","Psmd5","Psmd7","Rbpj","Rnf220","Ski","Smad3","Src","Sulf2","Tlr2","Wls"]
GO:0018196	8	peptidyl-asparagine modification	30	124	14.9973	0.000137769	0.00115028	["Alg10b","Alg11","B4galt1","B4galt4","B4galt6","Cmas","Ctsa","Dolpp1","Dpm2","Dpm3","Edem1","Fut8","Gfpt2","Man1c1","Man2a2","Mgat1","Mgat4a","Mgat4b","Mgat5","Mlec","Neu1","Pmm1","Slc17a5","St3gal1","St3gal3","St3gal4","St6gal1","St6galnac6","St8sia2","Syvn1"]
GO:0035023	9	regulation of Rho protein signal transduction	27	107	12.9412	0.000138017	0.00115028	["Abca1","Abl2","Adgrg1","Adra1a","Als2cl","Apoe","Arhgef1","Arhgef10l","Arhgef3","Arhgef6","Arhgef7","Arrb1","Dnmbp","F2r","Fgd2","Fgd4","Fgd6","Flcn","Itsn1","Kctd13","Lpar1","Pdcd10","Plekhg1","Plekhg3","Prex2","Rasgrf1","Spata13"]
GO:1903555	6	regulation of tumor necrosis factor superfamily cytokine production	27	107	12.9412	0.000138017	0.00115028	["Acp5","Adam8","Bcl3","C5ar2","Ccl3","Cd274","Cyba","Fadd","Fcgr3","Il12b","Il18","Il23a","Irak3","Jak2","Myd88","Nlrc3","Nod1","Nod2","Pf4","Rasgrp1","Sash3","Tlr1","Tlr2","Tlr9","Tnfrsf8","Trim30a","Zc3h12a"]
GO:0032760	8	positive regulation of tumor necrosis factor production	18	59	7.13583	0.000138105	0.00115028	["Ccl3","Cyba","Fadd","Fcgr3","Il12b","Il18","Il23a","Jak2","Myd88","Nod1","Nod2","Pf4","Rasgrp1","Sash3","Tlr1","Tlr2","Tlr9","Tnfrsf8"]
GO:0071396	6	cellular response to lipid	89	503	60.8359	0.000138274	0.00115028	["Abca1","Abl2","Ahr","Akr1c18","Aldh1a2","Aldh2","Apoe","Arg1","Arg2","Ass1","Atp1a2","Atp1a3","Bcas3","Bmi1","Brinp1","Brinp3","Casp9","Ccl5","Cd180","Cd300lb","Cd40","Cdk19","Cpt1a","Csf2","Csf3","Cyp1b1","E2f1","Edn1","Egfr","Egr1","Eln","Entpd1","Fcgr2b","Fcgr4","Fn1","Gfi1","Gnb1","Gng2","Hdac5","Hmbs","Hnrnpd","Htra2","Icam1","Il12a","Il12b","Il18","Il1b","Il6","Inhba","Irf3","Irf8","Jak2"…
GO:0046467	5	membrane lipid biosynthetic process	25	96	11.6108	0.000140478	0.00116545	["B4galt6","Cers6","Cln8","Csnk1g2","Dpm2","Dpm3","Gpaa1","Kdsr","Mppe1","P2rx7","Pigh","Pigq","Pigs","Pigt","Pigyl","Pigz","Prkd1","Sgpl1","Smpd1","Sphk2","Sptlc2","Sptssb","St6galnac6","St8sia2","Ugcg"]
GO:0046916	9	cellular transition metal ion homeostasis	25	96	11.6108	0.000140478	0.00116545	["Aplp2","Atox1","Atp2c1","Atp6v0a1","Atp6v0d2","Atp6v1a","Atp6v1e1","Ccdc22","Cp","Fth1","Ftl1","Heph","Hfe","Lcn2","Mcoln1","Mt2","Ndfip1","Slc11a2","Slc31a1","Slc31a2","Slc39a14","Slc46a1","Steap3","Tfr2","Ttc7"]
GO:0071222	6	cellular response to lipopolysaccharide	44	208	25.1568	0.000142043	0.00117685	["Abca1","Arg1","Arg2","Ass1","Ccl5","Cd180","Cd300lb","Cd40","Cdk19","Csf2","Csf3","Entpd1","Fcgr2b","Fcgr4","Fn1","Gfi1","Hdac5","Icam1","Il12a","Il12b","Il18","Il1b","Il6","Irf3","Irf8","Jak2","Lcn2","Ltc4s","Mapk8","Mef2c","Mmp9","Nfkb1","Nlrp3","Nos2","P2ry2","Plscr4","Serpine1","Src","Tlr9","Tnf","Tnfrsf1b","Tnfsf4","Tnip3","Zc3h12a"]
GO:0032735	7	positive regulation of interleukin-12 production	12	31	3.74933	0.000146482	0.00121198	["Cd40","Il12b","Il23a","Irf5","Irf8","Nod2","Rel","Tlr2","Tlr6","Tlr9","Tnfsf4","Tnfsf9"]
GO:0009306	5	protein secretion	32	136	16.4487	0.000147012	0.0012131	["Abca1","Crlf2","Erp29","Hps1","Lcp2","Lmf1","Lyn","Myo5a","Nlrc4","Nlrp3","Nod2","Notch1","Notch2","Optn","Pcsk5","Plek","Pnp","Pou2f2","Rab10","Rab11fip5","Rab3d","Rab40c","Rapgef4","Rasef","Rbpj","Rims2","Rnf19b","Steap3","Stxbp3","Tlr2","Trem1","Trem3"]
GO:0043280	9	positive regulation of cysteine-type endopeptidase activity involved in apoptotic process	32	136	16.4487	0.000147012	0.0012131	["Arrb1","Bak1","Casp1","Casp2","Casp3","Casp4","Casp7","Casp9","Cflar","Ctsc","Dapk1","F2r","F3","Fadd","Gsn","Hip1","Htra2","Jak2","Ndufa13","Nlrc4","Nlrp1b","Nlrp3","Nod1","Pparg","Rest","S100a8","Slc11a2","Smad3","Tnf","Tnfsf10","Tnfsf15","Xdh"]
GO:0016525	6	negative regulation of angiogenesis	22	80	9.67569	0.00014725	0.00121343	["Adgrb2","Amot","Angpt2","Col4a2","Cxcr3","Flcn","Foxo4","Gtf2i","Hdac5","Hhex","Krit1","Lif","Map2k5","Notch1","Pdcd10","Pde3b","Pf4","Rock1","Sema4a","Serpine1","Spink5","Stab1"]
GO:0014911	8	positive regulation of smooth muscle cell migration	14	40	4.83785	0.000149179	0.00122767	["Ccl5","Cyp1b1","F3","Il18","Il6st","Itgb3","Lpar1","Nrp1","P2ry2","P2ry6","Pdgfrb","Rapgef4","Rps6kb1","Src"]
GO:0051960	6	regulation of nervous system development	133	812	98.2083	0.000151186	0.00124252	["2900011O08Rik","Aatk","Abl2","Adgrb2","Adgrg1","Adgrl2","Adgrl3","Anapc2","Apoe","Arhgdia","Arhgef1","Arsb","Baiap2","Bend6","Braf","Brinp1","Brinp3","Cacna1a","Camk1","Camk1d","Ccl5","Cdk5rap3","Cib1","Cobl","Cpne6","Ctdsp1","Cul7","Cxcr4","Dguok","Draxin","Dvl2","Eif4e","Enc1","Epha4","Fat3","Fes","Fig4","Fkbp4","Fn1","Fzd3","Gdpd5","Gfi1","Gorasp1","Grn","Hmg20b","Hmga2","Ifrd1","Ift122","Il…
GO:2001237	8	negative regulation of extrinsic apoptotic signaling pathway	26	102	12.3365	0.000152455	0.00125127	["Cflar","Csf2","Dapk1","Gpx1","Icam1","Il19","Il1a","Il1b","Itga6","Map2k5","Nrg1","Nrp1","Pea15a","Pf4","Prdx2","Psen2","Rffl","Rps6kb1","Scrt2","Serpine1","Sgk3","Src","Tcf7l2","Tgfbr1","Tnf","Tnfsf4"]
GO:0006417	7	regulation of translation	59	304	36.7676	0.00015333	0.00125677	["Aarsd1","Ago3","Ago4","Ang","Bcl3","Ccl5","Cd28","Cnot7","Coa3","Cyp1b1","Dapk1","Ddx1","Ddx25","Dnajc1","Dtd1","Eif2ak2","Eif2s1","Eif3c","Eif4e","Eif4ebp2","Eif4ebp3","Eif4g2","Eif5","Enc1","Fam129a","Foxo3","Grb7","Hnrnpd","Igf2bp1","Igf2bp2","Igfbp5","Il6","Imp3","Klhl25","Larp1","Lars2","Mknk2","Mtpn","Mvk","Nanos1","Nck1","Nck2","Pink1","Piwil2","Piwil4","Ppp1r15b","Rgs2","Rpl13a","Rps3",…
GO:0002696	6	positive regulation of leukocyte activation	54	272	32.8974	0.000157111	0.00128605	["Adam8","Adora2b","Bmi1","Bst1","Ccl5","Cd274","Cd28","Cd300lb","Cd38","Cd40","Cd55","Cdkn1a","Coro1a","Csk","Ebi3","Fadd","Flot2","Gpr183","Hps1","Il12a","Il12b","Il13ra1","Il18","Il1b","Il1rl2","Il23a","Il6","Il6st","Inpp5d","Itgal","Lyn","Map3k14","Map3k8","Mef2c","Myd88","Nck1","Nck2","Nfatc2","Nod2","Peli1","Pld2","Pnp","Prdm1","Sash3","Src","Syk","Tcf3","Tgfb1","Tgfbr2","Tnfsf13","Tnfsf4",…
GO:1901615	4	organic hydroxy compound metabolic process	88	498	60.2312	0.000157374	0.00128648	["Abca1","Abca2","Abcc3","Acaa2","Acss1","Akr1c18","Aldh1a2","Aldh2","Aldh3a2","Aplp2","Apoe","Atp2b2","Atp8b1","Cacna1a","Cebpa","Cept1","Cftr","Ch25h","Cln6","Cln8","Cpt1a","Crat","Crot","Cyb5r1","Cyp1b1","Cyp27a1","Dhcr7","Dhrs3","Dhrs9","Dpm2","Duox1","Duox2","Ebp","Gch1","Gdpd5","Ggps1","Gk","Got1","Gpd2","Hdc","Hsd17b3","Hsd3b7","Impa2","Inpp1","Inpp5b","Inpp5d","Inppl1","Ip6k1","Ldlrap1","…
GO:0050678	6	regulation of epithelial cell proliferation	58	298	36.042	0.00016039	0.00130939	["Aldh1a2","Ang","Apoe","Arg1","B4galt1","C5ar2","Ccl24","Ccl5","Ctsl","Cxcr3","Cyba","Deaf1","Ecm1","Egfr","Erbb4","F3","Fgfr2","Gja1","Glul","Gpx1","Grn","Htra1","Hyal1","Ift122","Ift172","Il6","Itgb3","Kdr","Krit1","Lamb1","Maged1","Map2k5","Mef2c","Mtss1","Nfib","Nod2","Notch1","Nrp1","Nrp2","Pdcd10","Ppp1r16b","Prkd1","Rptor","Sav1","Scn5a","Six1","Six4","Smad3","Sox11","Tbx18","Tcf7l2","Tgf…
GO:0015012	5	heparan sulfate proteoglycan biosynthetic process	9	19	2.29798	0.000161381	0.00131369	["B3gat3","Ext1","Ext2","Extl3","Hs6st1","Ndst1","Ndst2","Ndst3","Xylt1"]
GO:0042089	6	cytokine biosynthetic process	9	19	2.29798	0.000161381	0.00131369	["Cd28","Gadd45g","Il12b","Il18","Il19","Irf3","Myd88","Nod1","Pcsk5"]
GO:0030041	8	actin filament polymerization	11	27	3.26555	0.00016156	0.00131369	["Ang","Arpc4","Cobl","Coro7","Diaph2","Gas7","Gsn","Hcls1","Jak2","Msrb2","Mtss1"]
GO:0009101	6	glycoprotein biosynthetic process	15	45	5.44258	0.000163875	0.00133075	["B3gat3","B4galt1","Cant1","Ext1","Ext2","Extl3","Gcnt1","Hs6st1","Man1c1","Ndst1","Ndst2","Ndst3","Phlda1","Tnip1","Xylt1"]
GO:0000186	8	activation of MAPKK activity	20	70	8.46623	0.000164674	0.00133548	["Braf","Crk","Egfr","Eif2ak2","F2r","Flt1","Gadd45b","Gadd45g","Jak2","Map2k1","Map3k1","Map3k11","Map3k14","Map3k3","Map3k8","Map3k9","Mapkbp1","Stk3","Taok1","Tgfbr1"]
GO:0000075	5	cell cycle checkpoint	50	247	29.8737	0.000165297	0.00133875	["Anapc10","Anapc11","Anapc2","Atm","Babam1","Cdk2","Cdk5rap3","Cdkn1a","Cdt1","Chek2","Dgkz","Dna2","E2f1","Fancg","Fbxo6","Foxn3","Foxo4","Hmga2","Ier3","Mad2l1bp","Msh2","Pea15a","Plk3","Plk5","Psma2","Psma3","Psma4","Psma5","Psma6","Psmb4","Psmb7","Psmc1","Psmc2","Psmc4","Psmc6","Psmd1","Psmd10","Psmd12","Psmd5","Psmd7","Rad9a","Rbbp8","Rfc2","Rfwd2","Rpa1","Taok1","Tgfb1","Tpr","Wac","Xpc"]
GO:0002819	6	regulation of adaptive immune response	31	131	15.844	0.000165793	0.001341	["B2m","Cd28","Cd40","Cd44","Cd55","Fadd","Fcgr2b","Fcgr3","Fzd5","Il12a","Il12b","Il1b","Il20rb","Il23a","Il27","Il6st","Mef2c","Ndfip1","Nlrp10","Nod2","P2rx7","Pkn1","Pnp","Pvr","Samsn1","Sash3","Tgfb1","Thoc1","Tnf","Tnfsf13","Tnfsf4"]
GO:1901343	6	negative regulation of vasculature development	23	86	10.4014	0.000166325	0.00134353	["Adgrb2","Amot","Angpt2","Col4a2","Cxcr3","Flcn","Foxo4","Gtf2i","Hdac5","Hhex","Krit1","Lif","Map2k5","Notch1","Pdcd10","Pde3b","Pf4","Rock1","Sema4a","Serpine1","Spink5","Stab1","Xdh"]
GO:0031960	6	response to corticosteroid	52	260	31.446	0.000169957	0.00137088	["Aanat","Acads","Adm","Ahr","Akr1c18","Anxa3","Arg1","Arg2","Ass1","Bckdha","Bmi1","C1qb","Casp3","Casp9","Ccl5","Cdkn1a","Cebpa","Ctsl","Cxcl1","Cyp1b1","Dusp1","Edn1","Egfr","Eln","Fn1","Fosl2","Got1","Hmbs","Hp","Hsd17b3","Igfbp7","Il1b","Il6","Jak2","Map2k1","Muc5ac","Nos2","Notch1","Nr3c1","Pck2","Pebp1","Plat","Ptgs1","Ptpru","Rest","Rps6kb1","Serpine1","Socs3","Src","Tgfb1","Tnf","Txn1"]
GO:0032494	5	response to peptidoglycan	7	12	1.45135	0.00017083	0.00137088	["Il6","Irak3","Irf5","Myd88","Nod2","Tlr2","Trem2"]
GO:0032725	7	positive regulation of granulocyte macrophage colony-stimulating factor production	7	12	1.45135	0.00017083	0.00137088	["Il12b","Il18","Il1b","Il23a","Rasgrp1","Syk","Tlr9"]
GO:0038061	7	NIK/NF-kappaB signaling	7	12	1.45135	0.00017083	0.00137088	["Ikbke","Map3k14","Nfkb1","Nfkb2","Ppp4c","Rel","Relb"]
GO:0071801	6	regulation of podosome assembly	7	12	1.45135	0.00017083	0.00137088	["Capg","Csf2","Gsn","Hck","Lcp1","Src","Tnf"]
GO:0042509	8	regulation of tyrosine phosphorylation of STAT protein	19	65	7.8615	0.00017115	0.00137166	["Ccl5","Cd40","Csf2","Erbb4","Hcls1","Hnf4a","Il12a","Il12b","Il18","Il23a","Il6","Il6ra","Il6st","Jak2","Lif","Lyn","Nf2","Osm","Ptpn2"]
GO:0043900	4	regulation of multi-organism process	84	472	57.0866	0.000172418	0.00138002	["1810022K09Rik","Acvr1b","Alpk1","Ap1b1","Ap1s1","Ap1s3","Ap2a1","Apoe","Astl","B2m","B4galt1","Ccl3","Ccl5","Cd180","Cd28","Cd37","Cd37 (ENSMUSG00000109208)","Cd55","Cd93","Chaf1b","Chst3","Cib1","Cxcl1","Cyba","D430041D05Rik","Ddb1","Ddx5","Ddx60","Eif2ak2","Eif2s1","Gbp4","Gsn","Hck","Hmga2","Hpgds","Htra1","Il12b","Il18","Il23a","Il27","Inhba","Irf3","Irf8","Isg15","Map3k1","Mtss1","Mvb12a",…
GO:0006066	5	alcohol metabolic process	67	358	43.2987	0.000175442	0.00140239	["Abca1","Abca2","Acaa2","Acss1","Akr1c18","Aldh1a2","Aldh2","Aldh3a2","Aplp2","Apoe","Cebpa","Cept1","Cftr","Ch25h","Cln6","Cln8","Cyb5r1","Cyp1b1","Cyp27a1","Dhcr7","Dhrs3","Dhrs9","Dpm2","Ebp","Gdpd5","Ggps1","Gk","Got1","Gpd2","Hsd17b3","Impa2","Inpp1","Inpp5b","Inpp5d","Inppl1","Ip6k1","Ldlrap1","Lipa","Lpcat2","Lrp1","Lrp2","Lrp5","Mvk","Npc1","Nudt3","Nus1","Pctp","Pcyt1a","Pla2g15","Plcb2…
GO:0031330	7	negative regulation of cellular catabolic process	35	155	18.7467	0.000176265	0.00140714	["Anapc10","Anapc11","Anapc2","Atg7","Atm","Atraid","Bag6","Cdk5rap3","Dhx34","Egln1","Gipc1","Hfe","Hp","Ier3","Klhl40","Mad2l1bp","N4bp1","Npc1","Ophn1","Pink1","Psen2","Qsox1","Ric1","Rnf5","Slirp","Stat3","Sufu","Tbc1d14","Timp2","Tlk2","Tpr","Ubqln4","Ubxn1","Wac","Wdr6"]
GO:0098542	4	defense response to other organism	70	378	45.7177	0.000176558	0.00140764	["Acp5","Adam17","Adamts4","Anxa3","Apobec1","Atg7","Batf","Batf2","Bcl3","Cd37","Cd37 (ENSMUSG00000109208)","Cd40","Cotl1","Cxcl9","Ddx60","Eif2ak2","Exosc5","Fadd","Fau","Gbp3","Gbp4","Gbp7","Hck","Hist1h2bj","Hp","Hyal2","Ifih1","Iigp1","Il12a","Il12b","Il1f5","Il23a","Il6","Irf3","Irf5","Irf8","Isg15","Mr1","Myd88","Myo1f","Naip2","Nlrc4","Nlrp10","Nlrp3","Nod1","Nod2","Nos2","Notch2","Optn",…
GO:0043094	5	cellular metabolic compound salvage	13	36	4.35406	0.000178318	0.00141799	["Adi1","Aprt","Bhmt","Dguok","Gmpr","Got1","Mri1","Pdxk","Pnp","Pnp2","Tk2","Uck1","Upp1"]
GO:0046627	7	negative regulation of insulin receptor signaling pathway	13	36	4.35406	0.000178318	0.00141799	["Cish","Enpp1","Il1b","Inppl1","Ncoa5","Nucb2","Pid1","Prkcd","Ptpn2","Ptpre","Rps6kb1","Socs3","Tsc2"]
GO:1901654	5	response to ketone	47	229	27.6967	0.000182665	0.00145067	["Aanat","Aldh2","Arg1","Arg2","Ass1","Bmi1","Casp9","Cbr1","Ccl5","Cd38","Cdkn1a","Cyp1b1","Dnmt1","Dusp1","Edn1","Egfr","Eln","Erbb4","Fn1","Fosl2","Gnb1","Gng2","Hmbs","Hnrnpd","Hsd17b3","Igfbp7","Il1b","Il6","Jak2","Mbp","Nos2","Nr3c1","P2ry6","Pdxk","Pebp1","Plat","Pparg","Ptgs1","Rps6kb1","Serpine1","Socs3","Src","Tgfb1","Tgfbr1","Tlr2","Tnfsf4","Txn1"]
GO:0051444	7	negative regulation of ubiquitin-protein transferase activity	24	92	11.127	0.000183886	0.00145848	["Anapc10","Anapc11","Anapc2","Atm","Limk1","Mad2l1bp","Psen2","Psma2","Psma3","Psma4","Psma5","Psma6","Psmb4","Psmb7","Psmc1","Psmc2","Psmc4","Psmc6","Psmd1","Psmd10","Psmd12","Psmd5","Psmd7","Tpr"]
GO:0038127	9	ERBB signaling pathway	42	198	23.9473	0.000186535	0.00147539	["Abl2","Adam12","Adam17","Adcy3","Adcy7","Adcy9","Ago3","Ago4","Akt1s1","Ap2a1","Arhgef7","Casp9","Cd28","Cdkn1a","Csk","Dgkd","Egfr","Epn1","Erbb4","Fgfr2","Foxo3","Foxo4","Gab1","Grb7","Itpr3","Map2k1","Nck2","Nrg1","Pdgfa","Pdgfrb","Pik3c2a","Pik3r2","Prkacb","Prkcd","Pxn","Reps2","Spry1","Src","Tdgf1","Tgfb1","Tnrc6b","Tsc2"]
GO:0051099	5	positive regulation of binding	30	126	15.2392	0.00018674	0.00147539	["Abl2","Acd","Arhgef7","Arrb1","Bambi","Csf3","Eno1","Epb41","Hmga2","Jak2","Kat2a","Krit1","Lfng","Med25","Mef2c","Mfng","Mmp9","Nrp1","Parp1","Pkd1","Plaur","Plxnd1","Rapgef2","Ski","Sppl3","Stk3","Tcf7l2","Tgfb1","Tmem173","Txn1"]
GO:0071901	9	negative regulation of protein serine/threonine kinase activity	30	126	15.2392	0.00018674	0.00147539	["Apoe","Casp3","Cd300a","Cdk5rap3","Cdkn1a","Cebpa","Chordc1","Cib1","Dusp1","Dusp16","Dusp2","Dusp3","Dusp7","Hhex","Hyal2","Il1b","Inppl1","Irak3","Lrp5","Lyn","Pdcd4","Pkib","Pkig","Prkag2","Prkcd","Ptprj","Rgs2","Smpd1","Spry1","Tsc2"]
GO:0022411	4	cellular component disassembly	85	480	58.0542	0.000187673	0.00148085	["Adam15","Adam17","Adam8","Adamts4","Atg2a","Atg7","Atg9b","Bmp1","Capg","Capn1","Casp3","Casp7","Cd44","Col11a1","Col11a2","Col12a1","Col16a1","Col19a1","Col4a1","Col4a2","Col4a5","Col5a3","Ctsb","Ctsd","Ctsl","Dedd2","Denr","Dnm1l","Eln","Fau","Fbn1","Fbn2","Fn1","Gabarapl1","Gsn","Gspt1","Hist3h2a","Hmga1","Hspa8","Kif2a","Kif5b","Lama3","Lamb1","Lcp1","Mical1","Mmp10","Mmp3","Mmp9","Mrpl10",…
GO:0006013	7	mannose metabolic process	6	9	1.08852	0.000188703	0.00148325	["Man1c1","Man2a2","Man2b1","Man2b2","Man2c1","Pmm1"]
GO:0010533	8	regulation of activation of Janus kinase activity	6	9	1.08852	0.000188703	0.00148325	["Ccl5","Cd300a","Hnf4a","Il12b","Il23a","Il6ra"]
GO:0055098	5	response to low-density lipoprotein particle	6	9	1.08852	0.000188703	0.00148325	["Abca1","F3","Mmp9","Npc1","Pparg","Serpine1"]
GO:0051384	7	response to glucocorticoid	49	242	29.269	0.000189801	0.00148997	["Aanat","Acads","Adm","Ahr","Anxa3","Arg1","Arg2","Ass1","Bckdha","Bmi1","C1qb","Casp3","Casp9","Ccl5","Cdkn1a","Cebpa","Ctsl","Cxcl1","Cyp1b1","Dusp1","Edn1","Egfr","Eln","Fn1","Fosl2","Got1","Hmbs","Hp","Hsd17b3","Igfbp7","Il1b","Il6","Jak2","Map2k1","Muc5ac","Nos2","Nr3c1","Pck2","Pebp1","Plat","Ptgs1","Ptpru","Rest","Rps6kb1","Serpine1","Socs3","Tgfb1","Tnf","Txn1"]
GO:0008283	3	cell proliferation	122	738	89.2583	0.000190456	0.0014932	["Acvr2a","Appl1","Arhgef1","Ascc3","Bak1","Blzf1","Bmper","Cadm1","Cd151","Cd180","Cd40","Cdk5rap3","Cfb","Cops2","Csf2","Ctc1","Cul1","Cxcl1","Cxcr4","Dagla","Daglb","Dock8","Egfr","Egr1","Eif2s2","Elf5","Eln","Erbb4","Esrrb","Etv6","Fcgr4","Fes","Fgfr2","Frat2","Fscn1","Ftsj2","Fzd3","Gab1","Glul","Gnb1","Gng2","Gpx1","Grn","Hhex","Hlcs","Hmga2","Ifnar2","Ifrd1","Igf2bp1","Igfbp4","Igfbp5","Il…
GO:0002699	6	positive regulation of immune effector process	37	168	20.319	0.00020018	0.00156744	["Adora2b","B2m","Cadm1","Cd28","Cd300a","Cd37","Cd37 (ENSMUSG00000109208)","Cd40","Cxcl1","Ddx60","Fadd","Fcgr3","Fes","Fzd5","Il12a","Il12b","Il13ra1","Il1b","Il23a","Il6","Lyn","Nod2","Nos2","P2rx7","Pld2","Pnp","Pvr","Rasgrp1","Rps19","Sash3","Snx6","Syk","Tgfb1","Tlr2","Tnf","Tnfsf13","Tnfsf4"]
GO:0016241	6	regulation of macroautophagy	14	41	4.95879	0.000201497	0.00157373	["Atg7","Larp1","Npc1","Pafah1b2","Pink1","Qsox1","Rab1b","Rnf5","Sh3glb1","Tbc1d14","Trim13","Ubqln4","Ulk1","Wac"]
GO:0032651	7	regulation of interleukin-1 beta production	14	41	4.95879	0.000201497	0.00157373	["Acp5","Casp1","Casp4","Ccl3","F2r","Il18","Jak2","Mefv","Nlrp3","Nod1","Nod2","P2rx7","Smad3","Trim16"]
GO:0048729	4	tissue morphogenesis	76	420	50.7974	0.000203035	0.00158373	["Adam8","Adm","Ahr","Aldh1a2","B4galt1","C2cd3","Car2","Cd44","Col11a1","Col4a1","Commd5","Csk","Ctnnbip1","Ctsd","Ctsl","Cxcr4","Dag1","Ddr1","Dvl2","Edn1","Egfr","Egln1","Epha4","Epha7","Fat4","Fgfr2","Flt1","Fzd5","Gcnt1","Gcnt3","Gja1","Hdac5","Heg1","Hhex","Ift172","Il6","Kdm2b","Kdr","Lama1","Lrp5","Matk","Mef2c","Megf8","Mtss1","Mybpc3","Myh6","Mylk","Ncoa3","Ndrg4","Notch1","Notch2","Nr3…
GO:0051437	8	positive regulation of ubiquitin-protein ligase activity involved in regulation of mitotic cell cycle transition	20	71	8.58718	0.000203478	0.00158517	["Anapc10","Anapc11","Anapc2","Cul1","Psma2","Psma3","Psma4","Psma5","Psma6","Psmb4","Psmb7","Psmc1","Psmc2","Psmc4","Psmc6","Psmd1","Psmd10","Psmd12","Psmd5","Psmd7"]
GO:1901990	7	regulation of mitotic cell cycle phase transition	52	262	31.6879	0.000207162	0.00161182	["Anapc10","Anapc11","Anapc2","Atm","Casp2","Ccnb3","Cdk2","Cdk5rap3","Cdkn1a","Ctc1","Ctdsp1","Ctdsp2","Ddb1","Dgkz","E2f1","Foxn3","Foxo4","Hmga2","Ier3","Ino80","Kank2","Mad2l1bp","Nacc2","Pid1","Plk3","Plk5","Psma2","Psma3","Psma4","Psma5","Psma6","Psmb4","Psmb7","Psmc1","Psmc2","Psmc4","Psmc6","Psmd1","Psmd10","Psmd12","Psmd5","Psmd7","Rcc2","Rfwd2","Tcf3","Tgfb1","Tjp3","Tpr","Tpra1","Ube2e…
GO:0045664	8	regulation of neuron differentiation	100	585	70.7535	0.00020886	0.00162297	["Aatk","Abl2","Anapc2","Apoe","Arhgdia","Arhgef1","Arsb","Baiap2","Bend6","Braf","Brinp1","Brinp3","Cacna1a","Camk1","Camk1d","Ccl5","Cdk5rap3","Cib1","Cobl","Cpne6","Ctdsp1","Cul7","Dguok","Draxin","Eif4e","Enc1","Epha4","Fat3","Fes","Fig4","Fkbp4","Fn1","Gdpd5","Gfi1","Gorasp1","Grn","Hmg20b","Ifrd1","Il1b","Il6","Inppl1","Itm2c","Kif13b","Lif","Limk1","Lpar1","Lrp1","Lrrc4c","Lyn","Map1b","Ma…
GO:0048011	8	neurotrophin TRK receptor signaling pathway	54	275	33.2602	0.000209975	0.00162957	["Adam17","Adcy3","Adcy7","Adcy9","Adora2a","Ago3","Ago4","Akt1s1","Ap2a1","Arhgdia","Arhgef1","Arhgef3","Arhgef6","Arhgef7","Braf","Casp2","Casp3","Casp9","Cd28","Cdkn1a","Crk","Dusp3","Dusp7","Egfr","Erbb4","Fgd2","Fgd4","Fgfr2","Foxo3","Foxo4","Gab1","Itpr3","Itsn1","Maged1","Map2k1","Map2k5","Mapk8","Mef2c","Myd88","Nfkb1","Nrg1","Pcsk5","Pdgfa","Pdgfrb","Pik3r2","Prkacb","Prkcd","Psen2","Pse…
GO:0010038	5	response to metal ion	71	387	46.8062	0.000212665	0.00164835	["Aanat","Abcc8","Acp5","Akr1c18","Alas1","Alox5ap","Apobec1","Aqp9","Arg1","Arg2","Ass1","Atp13a2","Atp5d","B2m","Braf","Car2","Casp3","Casp9","Cdk2","Cebpa","Cp","D2hgdh","Dnmt1","Dnmt3a","Dusp1","Edn1","Egfr","Eln","Entpd1","Entpd6","Fn1","Ftl1","Gsn","Hmbs","Hnrnpd","Hp","Hsd17b3","Icam1","Il1a","Il6","Itpr3","Khk","Mapk8","Mbp","Mef2c","Mmp9","Nedd4l","Nfkb1","Nos2","Npc1","Nptx1","Nr3c1","P…
GO:0002374	7	cytokine secretion involved in immune response	4	4	0.483785	0.000213562	0.00165322	["Nod2","Tlr2","Trem1","Trem3"]
GO:0009314	4	response to radiation	92	530	64.1015	0.000214795	0.00166067	["Aanat","Abl2","Agap3","Angpt2","Apobec1","Apoe","Arrb1","Atm","Atp1a2","Atp1a3","Babam1","Bak1","Bcl3","Braf","Casp3","Casp7","Casp9","Cdkn1a","Cds2","Chek2","Cxcl1","Cyba","Dcun1d3","Ddb1","Deaf1","Dhrs3","Dnmt1","Dnmt3a","Dusp1","Egfr","Egr1","Entpd1","F11r","Fancg","Fosl2","Gnb1","Gpc6","Gpx1","Hist3h2a","Hp","Hyal1","Hyal2","Icam1","Il12a","Il12b","Il18","Il1a","Il1b","Ino80","Itgb3","Lrp1"…
GO:0050732	10	negative regulation of peptidyl-tyrosine phosphorylation	15	46	5.56352	0.0002162	0.00166943	["Cd300a","Hnf4a","Hyal2","Il18","Lrrk1","Nf2","Prkcd","Psen2","Ptpn2","Samsn1","Sh3bp5l","Snx6","Srcin1","Zfyve28","Zgpat"]
GO:0051352	6	negative regulation of ligase activity	24	93	11.248	0.000219791	0.00169289	["Anapc10","Anapc11","Anapc2","Atm","Limk1","Mad2l1bp","Psen2","Psma2","Psma3","Psma4","Psma5","Psma6","Psmb4","Psmb7","Psmc1","Psmc2","Psmc4","Psmc6","Psmd1","Psmd10","Psmd12","Psmd5","Psmd7","Tpr"]
GO:0051439	5	regulation of ubiquitin-protein ligase activity involved in mitotic cell cycle	24	93	11.248	0.000219791	0.00169289	["Anapc10","Anapc11","Anapc2","Atm","Cdk2","Cul1","Mad2l1bp","Psma2","Psma3","Psma4","Psma5","Psma6","Psmb4","Psmb7","Psmc1","Psmc2","Psmc4","Psmc6","Psmd1","Psmd10","Psmd12","Psmd5","Psmd7","Tpr"]
GO:0051051	5	negative regulation of transport	88	503	60.8359	0.000222756	0.00171357	["Abcc8","Acaa2","Acsl4","Apoe","Atp1a2","Braf","C5ar2","Ccdc22","Cd300a","Coro1a","Csk","Edn1","Enpp1","Entpd1","Erp29","F2r","Fam89b","Fcgr2b","Fgf12","Fn1","Gbp4","Gpaa1","Grk6","Gsto1","Hadh","Hnf4a","Icam1","Ier3","Il1b","Il1f5","Il6","Inhba","Itgb3","Kdelr1","Lif","Map1b","Map4k4","Midn","Mmp9","Ndfip1","Nedd4l","Nfkb1","Nfkbie","Nlrp3","Notch1","Nr1h2","Nrg1","Nucb2","Osm","P2ry1","Pde3b",…
GO:0046626	6	regulation of insulin receptor signaling pathway	16	51	6.16826	0.000223429	0.00171659	["Cish","Enpp1","Il1b","Inppl1","Ncoa5","Nucb2","Osbpl8","Pid1","Prkcd","Ptpn2","Ptpre","Rps6kb1","Serpina12","Socs3","Src","Tsc2"]
GO:0010948	6	negative regulation of cell cycle process	50	250	30.2365	0.000224144	0.00171993	["Anapc10","Anapc11","Anapc2","Atm","Casp2","Cdk2","Cdk5rap3","Cdkn1a","Chek2","Ctdsp1","Ctdsp2","Dgkz","Fgfr2","Foxn3","Foxo4","Hmga2","Hmgn5","Ier3","Kank2","Lif","Mad2l1bp","Msh2","Nacc2","Osm","Ovol1","Plk3","Psma2","Psma3","Psma4","Psma5","Psma6","Psmb4","Psmb7","Psmc1","Psmc2","Psmc4","Psmc6","Psmd1","Psmd10","Psmd12","Psmd5","Psmd7","Rbm14","Rfwd2","Sox11","Susd2","Thoc1","Tpr","Tpra1","Zc…
GO:2001056	9	positive regulation of cysteine-type endopeptidase activity	33	145	17.5372	0.000227865	0.0017463	["Arrb1","Bak1","Casp1","Casp2","Casp3","Casp4","Casp7","Casp9","Cflar","Ctsc","Dapk1","F2r","F3","Fadd","Gsn","Hip1","Htra2","Jak2","Mefv","Ndufa13","Nlrc4","Nlrp1b","Nlrp3","Nod1","Pparg","Rest","S100a8","Slc11a2","Smad3","Tnf","Tnfsf10","Tnfsf15","Xdh"]
GO:0071593	7	lymphocyte aggregation	49	244	29.5109	0.000232806	0.00178194	["Abl2","Adam17","B2m","Batf","Bcl3","Braf","Cadm1","Cblb","Cd151","Cd28","Coro1a","Cxcr4","Dock8","Egr1","Fadd","Fcgr4","Fzd5","Gadd45g","Hs1bp3","Icam1","Il12b","Il23a","Il6","Itgal","Jmjd6","Kif13b","Lcp1","Mafb","Mpzl2","Nck1","Nck2","Nlrc3","P2rx7","Patz1","Ppp3ca","Prdx2","Psen2","Ptpn2","Relb","Sema4a","Sla2","Smad3","Stk10","Stx11","Tcf3","Tgfb1","Tnfsf4","Zfp36l1","Zfp36l2"]
GO:0010888	5	negative regulation of lipid storage	8	16	1.93514	0.000236872	0.0018039	["Abca1","Il6","Itgb3","Nr1h2","Osbpl8","Pparg","Ptpn2","Tnf"]
GO:0055094	4	response to lipoprotein particle	8	16	1.93514	0.000236872	0.0018039	["Abca1","Adam17","Ccl5","F3","Mmp9","Npc1","Pparg","Serpine1"]
GO:0030201	5	heparan sulfate proteoglycan metabolic process	11	28	3.38649	0.000237146	0.0018039	["B3gat3","Ext1","Ext2","Extl3","Hpse","Hs6st1","Ndst1","Ndst2","Ndst3","Sulf2","Xylt1"]
GO:0035987	6	endodermal cell differentiation	11	28	3.38649	0.000237146	0.0018039	["Col11a1","Col12a1","Col4a2","Fn1","Hmga2","Inhba","Itga4","Itgb5","Lama3","Lamb1","Mmp9"]
GO:0061028	7	establishment of endothelial barrier	11	28	3.38649	0.000237146	0.0018039	["Ezr","F11r","Icam1","Myadm","Myd88","Ppp1r16b","Ptprs","Rab1b","Rap1b","Rap2c","Rapgef2"]
GO:0016053	5	organic acid biosynthetic process	52	264	31.9298	0.00025158	0.00190896	["Acot7","Acss1","Adi1","Aldh1a2","Aldh1l1","Aldh4a1","Alox5ap","Ass1","Bhmt","Ch25h","Chst12","Chst14","Cotl1","Cyp27a1","Dhrs9","Dsel","Edn1","Fads1","Gamt","Gch1","Glul","Got1","Gpt2","Gsto1","Gulo","Hacd4","Hpgds","Hsd17b12","Hsd3b7","Ltc4s","Mlycd","Mri1","Mthfd1","Mthfd1l","Mthfd2l","Mtr","Myo5a","Padi2","Pccb","Plod1","Prkag2","Ptges3","Ptgs1","Pycrl","Rdh16","Rnpep","Rnpepl1","Shmt2","Syk…
GO:0046394	6	carboxylic acid biosynthetic process	52	264	31.9298	0.00025158	0.00190896	["Acot7","Acss1","Adi1","Aldh1a2","Aldh1l1","Aldh4a1","Alox5ap","Ass1","Bhmt","Ch25h","Chst12","Chst14","Cotl1","Cyp27a1","Dhrs9","Dsel","Edn1","Fads1","Gamt","Gch1","Glul","Got1","Gpt2","Gsto1","Gulo","Hacd4","Hpgds","Hsd17b12","Hsd3b7","Ltc4s","Mlycd","Mri1","Mthfd1","Mthfd1l","Mthfd2l","Mtr","Myo5a","Padi2","Pccb","Plod1","Prkag2","Ptges3","Ptgs1","Pycrl","Rdh16","Rnpep","Rnpepl1","Shmt2","Syk…
GO:0010821	6	regulation of mitochondrion organization	63	336	40.6379	0.000255337	0.00193421	["1810022K09Rik","Acaa2","Adamts7","Alpk1","Atg7","Bak1","Bmf","Boc","Cd93","Chaf1b","Chst3","Coa3","Cyb5r1","D430041D05Rik","Ddhd1","Dhodh","Dnm1l","Dynll2","E2f1","Eif2s1","Eva1b","Flcn","Fzd5","Gpx1","Higd1a","Htra2","Ier3","Inf2","Kat2a","Kcnn3","Krcc1","Map2k1","Mapk8","Mgarp","Mllt11","Mmp9","Myh11","Mylk","Ndufb9","Npepps","Nrg1","Nthl1","Pid1","Pink1","Plagl2","Plaur","Pnpo","Ppp3cc","Psm…
GO:0006487	5	protein N-linked glycosylation	31	134	16.2068	0.000255539	0.00193421	["Alg10b","Alg11","B4galt1","B4galt4","B4galt6","Cmas","Ctsa","Dolpp1","Dpm2","Dpm3","Edem1","Fut8","Gfpt2","Gorasp1","Man1c1","Man2a2","Mgat1","Mgat4a","Mgat4b","Mgat5","Mlec","Neu1","Pmm1","Slc17a5","St3gal1","St3gal3","St3gal4","St6gal1","St6galnac6","St8sia2","Syvn1"]
GO:0043949	7	regulation of cAMP-mediated signaling	10	24	2.90271	0.000257927	0.00194987	["Cxcl9","Cxcr3","Pde10a","Pde3b","Pde4a","Pebp1","Pf4","Ptgir","Rapgef2","Rgs2"]
GO:0007050	5	cell cycle arrest	33	146	17.6581	0.000260762	0.00196888	["Atm","Brinp1","Brinp3","Cdkn1a","Commd5","Cul1","Dusp1","Eif4g2","Foxo4","Gas2l1","Gas7","Il12a","Il12b","Ing4","Inhba","Jmy","Map2k1","Msh2","Notch2","Pkd1","Pmp22","Prkag2","Rptor","Sesn1","Skil","Smad3","Tcf7l2","Tgfb1","Tgfbr1","Trp53inp1","Tsc2","Wdr6","Zfhx3"]
GO:0060759	5	regulation of response to cytokine stimulus	27	111	13.425	0.000264388	0.00198938	["Aes","Agpat1","Agpat2","Ccl5","Crebrf","Ecm1","Edn1","Fadd","Gfi1","Ifnar2","Il1f5","Il6st","Irak2","Irak3","Irf3","Jak2","Map2k5","Nr1h2","Padi2","Pparg","Ptpn2","Pxdn","Rffl","Socs3","Syk","Trem2","Zbp1"]
GO:0097285	7	cell-type specific apoptotic process	27	111	13.425	0.000264388	0.00198938	["Aatk","Atm","Bak1","Casp3","Casp7","Casp9","Ctsl","Dnmt3a","E2f1","E2f2","Fadd","Gnb1","Gsn","Hcar2","Il6","Irf3","Mapk8","Nlrp1b","Pigt","Pkn1","Plk5","Ryr2","Siva1","Stk3","Tgfbr2","Tnf","Tnfrsf21"]
GO:0042108	7	positive regulation of cytokine biosynthetic process	19	67	8.10339	0.000264451	0.00198938	["Bcl3","Cd28","Ebi3","Fcgr3","Il12b","Il1a","Il1b","Il27","Myd88","Rel","Syk","Tbk1","Tlr1","Tlr2","Tlr6","Tlr9","Tnf","Tnfrsf8","Zfpm1"]
GO:0015711	6	organic anion transport	68	370	44.7501	0.000271321	0.00203857	["Abca1","Abca12","Abca13","Abcc1","Abcc3","Abcc5","Abcd1","Acsl4","Acsl5","Apoe","Aqp9","Atp10a","Atp8b1","Cacna1a","Cftr","Cln8","Cpt1a","Crot","Gipc1","Gja1","Mfsd10","Nfkbie","P2rx7","Pctp","Plin2","Plscr4","Pparg","Pqlc2","Prelid2","Prkag2","Prkcd","Scarb1","Serinc5","Sfxn3","Sfxn5","Sh3bp4","Slc12a9","Slc13a3","Slc15a4","Slc16a7","Slc17a5","Slc19a1","Slc22a19","Slc25a10","Slc25a11","Slc25a1…
GO:2001022	6	positive regulation of response to DNA damage stimulus	18	62	7.49866	0.000276254	0.00207309	["Atm","Babam1","Cbx8","Ddx5","Eef1e1","Egfr","Hmga2","Nacc2","Npas2","Pcna","Pnp","Prkcd","Rad9a","Skil","Spidr","Steap3","Ube2n","Zfp385a"]
GO:0035306	9	positive regulation of dephosphorylation	15	47	5.68447	0.000282353	0.00211111	["Akap6","Cd300a","Jak2","Mef2c","Pdgfrb","Pink1","Plek","Ppp1r16b","Ppp2r4","Ppp2r5a","Prkcd","Smad3","Smpd1","Sppl3","Tgfb1"]
GO:0038034	6	signal transduction in absence of ligand	15	47	5.68447	0.000282353	0.00211111	["Appl1","Bak1","Bcl2a1b","Casp2","Casp3","Casp9","Dapk1","Fadd","Foxo3","Il1a","Il1b","Kitl","Lcn2","Maged1","Mknk2"]
GO:0097192	7	extrinsic apoptotic signaling pathway in absence of ligand	15	47	5.68447	0.000282353	0.00211111	["Appl1","Bak1","Bcl2a1b","Casp2","Casp3","Casp9","Dapk1","Fadd","Foxo3","Il1a","Il1b","Kitl","Lcn2","Maged1","Mknk2"]
GO:0046330	9	positive regulation of JNK cascade	29	123	14.8764	0.000283108	0.00211418	["Crk","Dvl2","Edn1","Epha4","Fgd4","Fzd5","Gab1","Gadd45b","Gadd45g","Il1a","Il1b","Ltbr","Map3k1","Map3k11","Map3k9","Mapkbp1","Mink1","Myd88","Nod1","Nod2","Nox1","Pkn1","Rasgrp1","Stk3","Syk","Taok1","Tlr6","Tlr9","Tnf"]
GO:0042531	9	positive regulation of tyrosine phosphorylation of STAT protein	16	52	6.2892	0.000286846	0.00213948	["Ccl5","Cd40","Csf2","Erbb4","Hcls1","Il12a","Il12b","Il18","Il23a","Il6","Il6ra","Il6st","Jak2","Lif","Lyn","Osm"]
GO:1903364	8	positive regulation of cellular protein catabolic process	37	171	20.6818	0.000290133	0.00216137	["Anapc10","Anapc11","Anapc2","Apoe","Bag6","Ccdc22","Cdk5rap3","Cebpa","Csnk1e","Ctsc","Cul1","Ezr","Fbxl5","Fbxo22","Hspbp1","Plk3","Psen2","Psma2","Psma3","Psma4","Psma5","Psma6","Psmb4","Psmb7","Psmc1","Psmc2","Psmc4","Psmc6","Psmd1","Psmd10","Psmd12","Psmd5","Psmd7","Rfwd2","Stub1","Sumo3","Zfand2a"]
GO:0097202	8	activation of cysteine-type endopeptidase activity	26	106	12.8203	0.000295752	0.00220055	["Bak1","Casp1","Casp2","Casp3","Casp4","Casp7","Casp9","Cflar","Ctsc","F2r","F3","Fadd","Hip1","Jak2","Nlrc4","Nlrp1b","Nlrp3","Nod1","Pparg","S100a8","Slc11a2","Smad3","Tnf","Tnfsf10","Tnfsf15","Xdh"]
GO:0014074	5	response to purine-containing compound	41	196	23.7055	0.000300925	0.00223633	["Aanat","Adora2a","Ahr","Akap6","Alas1","Aqp9","Ass1","Bckdha","Braf","Casp1","Cdk2","Cftr","Cyp1b1","Dhodh","Dnmt1","Duox1","Duox2","Dusp1","Egr1","Entpd1","Fosl2","Hnf4a","Igfbp5","Il18","Il1b","Il6","Itpr3","P2rx7","P2ry2","Pebp1","Plat","Pparg","Rap1b","Rapgef2","Ryr2","Sepn1","Serpine1","Slc26a3","Thbd","Top1","Tyr"]
GO:1903322	9	positive regulation of protein modification by small protein conjugation or removal	39	184	22.2541	0.000315353	0.00233641	["Anapc10","Anapc11","Anapc2","Arrb1","Arrdc4","Bmi1","Ccdc22","Cd300lh","Cdk5rap3","Cul1","Fbxo22","Hspbp1","Ndfip1","Nmi","Nod2","Peli1","Pias3","Pink1","Psma2","Psma3","Psma4","Psma5","Psma6","Psmb4","Psmb7","Psmc1","Psmc2","Psmc4","Psmc6","Psmd1","Psmd10","Psmd12","Psmd5","Psmd7","Rassf5","Stra13","Stub1","Sumo3","Ube2n"]
GO:0043604	6	amide biosynthetic process	22	84	10.1595	0.000315535	0.00233641	["Aanat","Aldh1l1","Arg1","Arg2","Ass1","Cebpa","Cers6","Cln8","Gch1","Ggct","Haghl","Mthfd1","Mthfd1l","Mthfd2l","P2rx7","Pcsk5","Pnkd","Smpd1","Sptlc2","St6galnac6","St8sia2","Ugcg"]
GO:0051436	6	negative regulation of ubiquitin-protein ligase activity involved in mitotic cell cycle	22	84	10.1595	0.000315535	0.00233641	["Anapc10","Anapc11","Anapc2","Atm","Mad2l1bp","Psma2","Psma3","Psma4","Psma5","Psma6","Psmb4","Psmb7","Psmc1","Psmc2","Psmc4","Psmc6","Psmd1","Psmd10","Psmd12","Psmd5","Psmd7","Tpr"]
GO:0002761	7	regulation of myeloid leukocyte differentiation	28	118	14.2717	0.000319337	0.00235886	["Adam8","C1qc","Car2","Ccl3","Ccl5","Clec2d","Csf2","Ctnnbip1","Fadd","Hcls1","Il12b","Il23a","Inhba","Inpp5d","Itgb3","Kitl","Lif","Lyn","Mafb","Mitf","Ndfip1","Notch2","Pf4","Pilrb1","Ptpn2","Tmem64","Tnf","Zfpm1"]
GO:0050921	6	positive regulation of chemotaxis	28	118	14.2717	0.000319337	0.00235886	["Adam17","Camk1d","Ccl3","Ccl5","Cmklr1","Cxcl1","Cxcl9","Cxcr3","Edn1","F3","Fn1","Il16","Il1b","Il23a","Il6","Kdr","Lpar1","Megf8","Nrp1","Pdgfrb","Pf4","Prkd1","Ptprj","S1pr1","Serpine1","Smad3","Tgfb1","Vegfb"]
GO:0032945	8	negative regulation of mononuclear cell proliferation	19	68	8.22434	0.000325871	0.00240134	["Atm","Casp3","Cblb","Cd274","Cd300a","D930015E06Rik","Fcgr2b","Il20rb","Inpp5d","Lyn","Ndfip1","Peli1","Pkn1","Prdm1","Sox11","Tgfb1","Tnfrsf13b","Tnfrsf21","Zc3h12d"]
GO:0050672	8	negative regulation of lymphocyte proliferation	19	68	8.22434	0.000325871	0.00240134	["Atm","Casp3","Cblb","Cd274","Cd300a","D930015E06Rik","Fcgr2b","Il20rb","Inpp5d","Lyn","Ndfip1","Peli1","Pkn1","Prdm1","Sox11","Tgfb1","Tnfrsf13b","Tnfrsf21","Zc3h12d"]
GO:0042110	5	T cell activation	48	241	29.148	0.000326715	0.00240449	["Abl2","Adam17","B2m","Batf","Bcl3","Braf","Cadm1","Cblb","Cd151","Cd28","Coro1a","Cxcr4","Dock8","Egr1","Fadd","Fcgr4","Fzd5","Gadd45g","Hs1bp3","Icam1","Il12b","Il23a","Il6","Itgal","Jmjd6","Kif13b","Lcp1","Mafb","Mpzl2","Nck1","Nck2","Nlrc3","P2rx7","Patz1","Ppp3ca","Prdx2","Psen2","Ptpn2","Relb","Sema4a","Sla2","Smad3","Stx11","Tcf3","Tgfb1","Tnfsf4","Zfp36l1","Zfp36l2"]
GO:0051235	3	maintenance of location	37	172	20.8027	0.000327296	0.00240449	["Apoe","Arl2","Bcl3","Bscl2","Ccdc22","Cep350","Dag1","Enpp1","Ezr","Fbn1","Fbn2","Flnb","Fth1","Gaa","Gm2a","Gpaa1","Gsn","Hexb","Il1b","Kdelr1","Nfkbie","Pkd1","Plin2","Psmd10","S100a8","Soat1","Srgn","Sufu","Sun2","Syne2","Syne3","Tmsb10","Tnf","Tonsl","Twf1","Twf2","Vps13c"]
GO:0051701	4	interaction with host	29	124	14.9973	0.000327475	0.00240449	["Atg7","Atp6v0a1","Atp6v0d2","Atp6v1a","Atp6v1e1","Cd55","Cxcr4","Cyba","Cybb","Dag1","Eif2ak2","Hyal2","Icam1","Itgb3","Kpna3","Mmp9","Ncf4","Nos2","Npc1","Ptx3","Pvr","Siva1","Smad3","Tcp1","Tgfb1","Tlr2","Tnip1","Vps18","Xpr1"]
GO:0001885	6	endothelial cell development	13	38	4.59596	0.000331041	0.00242766	["Ezr","F11r","Gpx1","Heg1","Icam1","Myadm","Myd88","Ppp1r16b","Ptprs","Rab1b","Rap1b","Rap2c","Rapgef2"]
GO:0032645	6	regulation of granulocyte macrophage colony-stimulating factor production	7	13	1.5723	0.000331423	0.00242766	["Il12b","Il18","Il1b","Il23a","Rasgrp1","Syk","Tlr9"]
GO:0046903	4	secretion	107	642	77.6475	0.00033899	0.00248012	["Abca1","Abca12","Abcc3","Abcc4","Adm","Anxa3","Apba2","Aprt","Aqp9","Atp2b2","Cacna1a","Calu","Car2","Ccl3","Ccl5","Cd300a","Cftr","Coro1a","Crlf2","Ddr1","Dhodh","Edn1","Erbb4","Erp29","Exoc3l4","Fcgr3","Fn1","Gipc1","Gnpda1","Habp4","Hck","Hk2","Hps1","Hspa8","Il6","Inhba","Itgb3","Itsn1","Lat2","Lcp2","Lmf1","Lrp2","Lyn","Mertk","Milr1","Myo1f","Myo5a","Ncor2","Nlrc4","Nlrp3","Nod2","Notch1"…
GO:1903409	4	reactive oxygen species biosynthetic process	11	29	3.50744	0.000340543	0.00248852	["Arg2","Cyba","Cybb","Cyp1b1","Ddah2","Duox1","Duox2","Gch1","Nos2","Slc7a2","Spr"]
GO:0002443	4	leukocyte mediated immunity	23	90	10.8852	0.000343258	0.00250538	["Adam17","Bcl3","Cadm1","Cd300lb","Cd55","Crlf2","Ctsc","Fcgr2b","Fcgr3","H60b","Il6","Inpp5d","Msh2","Myd88","Myo1f","Pirb","Prkcd","Rnf19b","Sla2","Stx11","Tnfsf13","Trem1","Trem3"]
GO:1901292	5	nucleoside phosphate catabolic process	21	79	9.55475	0.000343725	0.0025058	["Cant1","Cnp","Dctpp1","Enpp1","Entpd1","Galt","Gda","Gpx1","Mgat1","Mlycd","Nt5c1a","Nthl1","Nudt1","Nudt3","Pde10a","Pde11a","Pde3b","Pde4a","Pnp","Upp1","Xdh"]
GO:0046474	6	glycerophospholipid biosynthetic process	40	191	23.1007	0.000345311	0.00251437	["Agpat1","Agpat2","Agpat5","Atm","Cdipt","Cds2","Cept1","Cpne6","Dpm2","Dpm3","Fig4","Gpaa1","Gpd1l","Inpp5d","Inppl1","Lpcat2","Mppe1","Mtm1","Mtmr3","Pcyt1a","Pi4kb","Pigh","Pigq","Pigs","Pigt","Pigyl","Pigz","Pik3c2a","Pik3r2","Pik3r4","Pik3r5","Pik3r6","Pip4k2a","Pld2","Pld3","Pld4","Sh3glb1","Slc27a1","Slc44a1","Synj2"]
GO:0010594	6	regulation of endothelial cell migration	26	107	12.9412	0.000346383	0.00251769	["Amot","Angpt2","Anxa3","Apoe","Bcas3","Bmper","Cib1","Edn1","Hdac5","Itgb3","Kdr","Krit1","Map2k5","Notch1","Nrp1","Nrp2","Pdcd10","Prcp","Prkd1","Scarb1","Sema4a","Sh3bgrl3","Sp100","Srpx2","Tdgf1","Tgfb1"]
GO:0007010	4	cytoskeleton organization	123	756	91.4353	0.000346588	0.00251769	["Abl2","Agfg1","Amot","Antxr1","Apoe","Arrb1","Atp2c1","Brk1","Bsn","Ccl24","Ccl3","Cdc42ep2","Cep126","Cep350","Cflar","Chek2","Cib1","Cln8","Cnn3","Cnp","Coro1a","Coro2a","Csrp1","Cul7","Cul9","Cxcl1","Daam1","Daam2","Dag1","Diaph2","Dnajb6","Dtnbp1","Elmo2","Eln","Epb41","Epb41l1","Epb41l4b","Ezr","F11r","Fes","Fgd2","Fgd4","Fgd6","Flnb","Fmnl1","Fmnl3","Fscn1","Gan","Gas2l1","Haus4","Haus8",…
GO:0060284	6	regulation of cell development	142	893	108.005	0.000353066	0.00256172	["2900011O08Rik","Aatk","Abl2","Adgrg1","Akap6","Anapc2","Apoe","Arhgdia","Arhgef1","Arhgef7","Arsb","Atg7","B4galt1","Baiap2","Bambi","Bcl9l","Bend6","Braf","Brinp1","Brinp3","Cacna1a","Camk1","Camk1d","Ccl5","Cdk5rap3","Cib1","Cobl","Cpne6","Ctdsp1","Cul7","Cxcr4","Dag1","Dguok","Draxin","Edn1","Eif4e","Enc1","Epha4","Fat3","Fbxo22","Fes","Fig4","Fkbp4","Fn1","Fzd3","Gcnt2","Gdpd5","Gfi1","Glip…
GO:0071346	7	cellular response to interferon-gamma	14	43	5.20069	0.000354686	0.00257042	["Arg2","Ass1","Ccl3","Ccl5","Dapk1","Edn1","Gbp3","Gbp4","Gbp7","Il12b","Il18","Nos2","Rpl13a","Tdgf1"]
GO:0032869	7	cellular response to insulin stimulus	27	113	13.6669	0.000359693	0.00260364	["Acsl5","Alas1","Apobec1","Aprt","Cdk2","Dennd4c","Egr1","Enpp1","Got1","Hdac5","Myo5a","Parp1","Pde3b","Pik3r2","Pparg","Prkcd","Rab10","Rasgrf1","Rhoq","Rps6kb1","Serpine1","Slc9a1","Src","Tbc1d4","Tsc2","Ucp2","Usf1"]
GO:0070489	4	T cell aggregation	48	242	29.269	0.000360591	0.00260706	["Abl2","Adam17","B2m","Batf","Bcl3","Braf","Cadm1","Cblb","Cd151","Cd28","Coro1a","Cxcr4","Dock8","Egr1","Fadd","Fcgr4","Fzd5","Gadd45g","Hs1bp3","Icam1","Il12b","Il23a","Il6","Itgal","Jmjd6","Kif13b","Lcp1","Mafb","Mpzl2","Nck1","Nck2","Nlrc3","P2rx7","Patz1","Ppp3ca","Prdx2","Psen2","Ptpn2","Relb","Sema4a","Sla2","Smad3","Stx11","Tcf3","Tgfb1","Tnfsf4","Zfp36l1","Zfp36l2"]
GO:0006029	6	proteoglycan metabolic process	16	53	6.41015	0.000365233	0.00263751	["Adamts12","B3gat3","Cant1","Chst14","Col11a1","Ext1","Ext2","Extl3","Hpse","Hs6st1","Man1c1","Ndst1","Ndst2","Ndst3","Sulf2","Xylt1"]
GO:0010977	7	negative regulation of neuron projection development	28	119	14.3926	0.000370133	0.00266975	["Aatk","Apoe","Arhgdia","Arhgef1","Cib1","Dguok","Draxin","Epha4","Fat3","Fkbp4","Gfi1","Gorasp1","Ifrd1","Inppl1","Itm2c","Lpar1","Lrp1","Map4k4","Mbp","Nrp1","Pmp22","Ppp3ca","Ptprg","Rapgef2","Rbpj","Ulk1","Ulk2","Xylt1"]
GO:0034599	5	cellular response to oxidative stress	36	167	20.198	0.00037482	0.00270038	["Adprhl2","Agap3","Akr1c18","Arg1","Cbx8","Ccl5","Cdk2","Cyp1b1","F3","Foxo3","Gpx1","Hnrnpd","Htra2","Il18","Il6","Kdm6b","Lcn2","Mapk8","Mmp3","Nfe2l2","Oxr1","Parp1","Pdk2","Pink1","Prdx2","Prdx5","Prkcd","Prkd1","Pxn","Sepn1","Serpine1","Slc11a2","Src","Trp53inp1","Txn1","Txnl1"]
GO:0007265	8	Ras protein signal transduction	47	236	28.5433	0.00037536	0.00270109	["Aatk","Adgrg1","Arhgdia","Arhgef1","Arhgef3","Baiap2","Brk1","Cdc42ep2","Cdc42ep3","Cdk2","Cdkn1a","Cyfip1","Dok1","Dok3","Gna12","Gnb1","Ift27","Ksr1","Limk1","Map2k1","Rab10","Rab1b","Rab20","Rab29","Rab32","Rab3d","Rab40c","Rab43","Rab4a","Rab6b","Rab7b","Ralgapa2","Ralgds","Rap1b","Rap2a","Rap2c","Rapgef2","Rasef","Rasgrp1","Rasgrp3","Rgl2","Rhog","Rhoj","Rhou","Rock1","Src","Ulk1"]
GO:0006259	5	DNA metabolic process	116	708	85.6299	0.000384581	0.0027642	["Acd","Ap1s1","Ap5s1","Ap5z1","Apobec1","Ascc1","Ascc3","Atm","Babam1","Batf","Baz1a","Bmi1","C77370","Casp3","Cdk2","Cdt1","Chaf1b","Chek2","Cib1","Csnk1e","Ctc1","Cyp1b1","Ddb1","Ddx1","Dna2","Dnajc2","Dnase2a","Dnmt1","Dnmt3a","Dnmt3l","Dtd1","Eef1e1","Eepd1","Eri3","Exosc5","Eya4","Faap100","Fancg","Fbxo6","Fto","Gstt1","H3f3a","Hist3h2a","Hmga1","Hmga2","Igfbp4","Ing4","Ino80","Ino80b","Isg…
GO:0071822	5	protein complex subunit organization	226	1515	183.233	0.000388526	0.00278929	["Abl2","Acads","Agfg1","Ahctf1","Ahnak","Alox5ap","Ang","Angptl4","Ap1b1","Apoa1bp","Arg1","Arl2","Arpc4","Arrb1","Atp6v0a1","Baiap2","Braf","Brk1","Capg","Casp4","Ccl5","Cct2","Cct3","Cd40","Cdc42ep2","Cenpo","Cep126","Chaf1b","Chek2","Chrnb3","Cib1","Coa3","Cobl","Col11a1","Col11a2","Col12a1","Col16a1","Col5a3","Coro1a","Coro7","Cox14","Cpt1a","Cyba","Cyp1b1","Dctpp1","Decr1","Dgkd","Dgkh","Di…
GO:0051047	6	positive regulation of secretion	71	395	47.7737	0.000393174	0.00281936	["Abl2","Acvr2a","Adam8","Adora2a","Adora2b","Ang","Arhgef7","Arrb1","Atg7","Cadm1","Casp1","Casp4","Ccl3","Cd274","Cd38","Cftr","Chia1","Cyba","Dnm1l","Dtnbp1","Edn1","Ezr","F2r","Gja1","Glul","Hcar2","Hyal2","Il1a","Il1b","Il6","Inhba","Irf3","Jak2","Lif","Mcu","Myo18a","Nlrp10","Nlrp3","Nod2","Nr1h2","Nr3c1","Nucb2","P2rx7","P2ry1","P2ry2","Pck2","Pfkfb2","Pfkm","Phpt1","Pink1","Pld2","Ppid","…
GO:0002697	5	regulation of immune effector process	76	429	51.8859	0.000393827	0.00282074	["1810022K09Rik","Adora2b","Alpk1","Ap1b1","Ap1s1","Ap1s3","Ap2a1","B2m","Cadm1","Ccl5","Cd28","Cd300a","Cd37","Cd37 (ENSMUSG00000109208)","Cd40","Cd55","Cd93","Cfb","Chaf1b","Chst3","Clec2d","Cxcl1","D430041D05Rik","Ddx60","Eif2ak2","Eif2s1","Fadd","Fcgr2b","Fcgr3","Fes","Fzd5","Gbp4","Hck","Htra1","Icam1","Il12a","Il12b","Il13ra1","Il1b","Il20rb","Il23a","Il27","Il6","Irak3","Irf3","Lyn","Mtss1…
GO:0010224	7	response to UV-B	8	17	2.05609	0.000400049	0.00285198	["Cdkn1a","Hyal1","Hyal2","Il12a","Il12b","Mme","Msh2","Xpc"]
GO:0010640	6	regulation of platelet-derived growth factor receptor signaling pathway	8	17	2.05609	0.000400049	0.00285198	["F3","Inppl1","Lrp1","Ndrg4","Ptgir","Ptpn2","Ptprj","Src"]
GO:0014812	5	muscle cell migration	8	17	2.05609	0.000400049	0.00285198	["Ddr1","Itgb3","Naca","Pdgfrb","Plat","Rock1","Six1","Six4"]
GO:0016239	7	positive regulation of macroautophagy	8	17	2.05609	0.000400049	0.00285198	["Atg7","Larp1","Pafah1b2","Pink1","Sh3glb1","Trim13","Ulk1","Wac"]
GO:0017015	7	regulation of transforming growth factor beta receptor signaling pathway	26	108	13.0622	0.000404498	0.002877	["Adam17","Bambi","Bcl9l","Fam89b","Fbn1","Fbn2","Flcn","Gipc1","Htra1","Mecom","Nedd4l","Onecut2","Peg10","Ski","Skil","Skor1","Smad3","Snx25","Snx6","Sox11","Stub1","Tdgf1","Tgfb1","Tgfbr1","Tgfbr2","Zfp703"]
GO:1903844	6	regulation of cellular response to transforming growth factor beta stimulus	26	108	13.0622	0.000404498	0.002877	["Adam17","Bambi","Bcl9l","Fam89b","Fbn1","Fbn2","Flcn","Gipc1","Htra1","Mecom","Nedd4l","Onecut2","Peg10","Ski","Skil","Skor1","Smad3","Snx25","Snx6","Sox11","Stub1","Tdgf1","Tgfb1","Tgfbr1","Tgfbr2","Zfp703"]
GO:0051053	7	negative regulation of DNA metabolic process	23	91	11.0061	0.000407518	0.00289513	["Acd","Cdan1","Chek2","Dnajc2","Dusp1","Flcn","Gja1","Gtpbp4","Hmga2","Inppl1","Kcnk2","Msh2","Msh3","Ndfip1","Nf2","Otub1","Pid1","Pinx1","Pparg","Rps3","Tgfb1","Thoc1","Zranb3"]
GO:0006825	8	copper ion transport	9	21	2.53987	0.00040943	0.00290534	["Atox1","Cp","Fkbp4","Heph","Slc11a2","Slc31a1","Slc31a2","Steap3","Steap4"]
GO:0038094	9	Fc-gamma receptor signaling pathway	21	80	9.67569	0.000413657	0.00293194	["Arpc4","Baiap2","Brk1","Crk","Cyfip1","Elmo2","Fcgr3","Fcgrt","Hck","Itpr3","Limk1","Lyn","Myo10","Nck1","Nckipsd","Pik3r2","Pld2","Prkcd","Src","Syk","Wipf1"]
GO:1903532	6	positive regulation of secretion by cell	66	362	43.7825	0.000415125	0.00293895	["Abl2","Acvr2a","Adam8","Adora2a","Adora2b","Ang","Arhgef7","Arrb1","Cadm1","Casp1","Casp4","Ccl3","Cd274","Cd38","Cftr","Chia1","Dnm1l","Dtnbp1","Edn1","Ezr","F2r","Gja1","Glul","Hcar2","Hyal2","Il1a","Il6","Inhba","Irf3","Jak2","Lif","Mcu","Myo18a","Nlrp10","Nlrp3","Nod2","Nr1h2","Nr3c1","Nucb2","P2rx7","P2ry1","Pck2","Pfkfb2","Pfkm","Phpt1","Pink1","Pld2","Ppid","Rab3d","Rapgef4","Rasgrp1","S…
GO:0009888	4	tissue development	126	781	94.459	0.000417078	0.00294937	["Acvr1b","Acvr2a","Adam15","Adm","Agpat2","Ahr","Aldh1a2","Aldh3a2","Angpt2","Arg2","Arid5b","Atp2b2","Atp2c1","Bmper","C2cd3","Cflar","Cln8","Col11a1","Col19a1","Ctc1","Ctsb","Ctsl","Cyp1b1","Duox2","Dyrk1b","Ecm1","Egfr","Elf5","Eln","Enpp1","Erbb4","Ext1","Fadd","Fgfr2","Flnb","Flot2","Fto","Fzd3","Gaa","Gab1","Gja1","Gla","Gnb1","Gpnmb","Gpx1","Gsn","Hck","Heg1","Hhex","Hmga2","Hps1","Ifrd1"…
GO:0002687	6	positive regulation of leukocyte migration	27	114	13.7879	0.000417833	0.0029513	["Adam17","Adam8","Camk1d","Ccl24","Ccl3","Ccl5","Cmklr1","Cxcl1","Cxcl9","Edn1","Fadd","Icam1","Il1a","Il1b","Il23a","Il6","Itga4","Itgb3","Kitl","Mmp9","Pf4","Ptprj","Serpine1","Tlr2","Tnf","Tnfsf4","Vegfb"]
GO:0006054	6	N-acetylneuraminate metabolic process	6	10	1.20946	0.0004233	0.00298305	["Amdhd2","Cmas","Nagk","Renbp","St3gal1","St6gal1"]
GO:0042088	6	T-helper 1 type immune response	6	10	1.20946	0.0004233	0.00298305	["Bcl3","Ebi3","Il12b","Il18","Relb","Tlr6"]
GO:0002706	7	regulation of lymphocyte mediated immunity	28	120	14.5135	0.000427931	0.00300877	["B2m","Cadm1","Cd28","Cd40","Cd55","Clec2d","Fadd","Fcgr2b","Fcgr3","Fzd5","Il12a","Il12b","Il1b","Il20rb","Il23a","Ndfip1","Nod2","P2rx7","Pik3r6","Pnp","Pvr","Rasgrp1","Sash3","Tgfb1","Thoc1","Tnf","Tnfsf13","Tnfsf4"]
GO:0002822	7	regulation of adaptive immune response based on somatic recombination of immune receptors built from immunoglobulin superfamily domains	28	120	14.5135	0.000427931	0.00300877	["B2m","Cd28","Cd40","Cd55","Fadd","Fcgr2b","Fcgr3","Fzd5","Il12a","Il12b","Il1b","Il20rb","Il23a","Il27","Mef2c","Ndfip1","Nlrp10","Nod2","P2rx7","Pkn1","Pnp","Pvr","Sash3","Tgfb1","Thoc1","Tnf","Tnfsf13","Tnfsf4"]
GO:0032611	6	interleukin-1 beta production	5	7	0.846623	0.000438337	0.00307136	["Casp1","Il1b","Mr1","Nlrp1b","Nlrp3"]
GO:0032612	5	interleukin-1 production	5	7	0.846623	0.000438337	0.00307136	["Casp1","Il1b","Mr1","Nlrp1b","Nlrp3"]
GO:2001169	9	regulation of ATP biosynthetic process	5	7	0.846623	0.000438337	0.00307136	["Entpd1","Flcn","Pid1","Pink1","Stat3"]
GO:0051188	5	cofactor biosynthetic process	31	138	16.6906	0.000441295	0.00308661	["Acot7","Acsl4","Acsl5","Acss1","Alas1","Aldh1l1","Coasy","Dcakd","Dld","Gcdh","Gch1","Hmbs","Hsd17b12","Mlycd","Mocos","Mthfd1","Mthfd1l","Mthfd2l","Nampt","Nmnat3","Pank1","Pdxk","Pnp","Pnpo","Qdpr","Slc11a2","Slc25a38","Spr","Tecr","Tmem14c","Urod"]
GO:0002009	5	morphogenesis of an epithelium	62	336	40.6379	0.00044152	0.00308661	["Adm","Ahr","Aldh1a2","B4galt1","C2cd3","Car2","Cd44","Col4a1","Commd5","Csk","Ctnnbip1","Ctsd","Ctsl","Cxcr4","Dag1","Ddr1","Dvl2","Edn1","Egfr","Epha4","Epha7","Fat4","Fgfr2","Flt1","Fzd5","Gja1","Hdac5","Hhex","Ift172","Il6","Kdm2b","Kdr","Lama1","Lrp5","Matk","Mef2c","Megf8","Mtss1","Ncoa3","Ndrg4","Notch1","Notch2","Nr3c1","Nrp1","Pkd1","Plod3","Plxnd1","Pxn","Rbpj","Ryr2","Six1","Smad3","S…
GO:0001666	4	response to hypoxia	64	350	42.3312	0.000463947	0.0032397	["Acaa2","Acot2","Adam17","Adam8","Adm","Alas1","Ang","Angpt2","Angptl4","Arg2","Atm","Casp1","Casp3","Cd38","Cxcr4","Dnmt3a","E2f1","Edn1","Egln1","Egr1","Eln","Flt1","Fosl2","Gnb1","Higd1a","Hmbs","Hp","Icam1","Il18","Il1a","Il1b","Kcnk2","Kdr","Mgarp","Mmp3","Mmp9","Nos2","Npepps","Pdgfa","Pink1","Plat","Pld2","Plod1","Prkcd","Psen2","Ryr2","Serpine1","Slc11a2","Slc9a1","Smad3","Socs3","Src","…
GO:0046850	6	regulation of bone remodeling	15	49	5.92636	0.000468095	0.00326495	["Adam8","Car2","Cd38","Csk","Gja1","Inpp5d","Itgb3","Lrp5","Ltbp3","P2rx7","S1pr1","Src","Suco","Syk","Tmem64"]
GO:0031100	5	organ regeneration	26	109	13.1831	0.000471015	0.00328158	["Adm","Angpt2","Anxa3","Bak1","Cdk2","Cdkn1a","Cebpa","Ddr1","Hfe","Hmbs","Hp","Lcp1","Lif","Lifr","Lrp2","Notch1","Pparg","Prps2","Ptpru","Socs3","Tgfb1","Tgfbr1","Tgfbr2","Top1","Ucp2","Ybx3"]
GO:0030030	4	cell projection organization	122	755	91.3144	0.000479824	0.00333916	["2700049A03Rik","Abl2","Adm","Adora2a","Apoe","Arhgef6","Arhgef7","Atg7","Atmin","Atp2b2","Baiap2","Boc","C2cd3","Cacna1a","Calu","Capg","Cby1","Cc2d2a","Ccl5","Cd44","Cep126","Cep131","Chst3","Cnp","Cntnap2","Coro1a","Cyfip1","Dclk1","Dnah5","Dscaml1","Dtnbp1","Egfr","Ehd1","Emp3","Epha4","Ezr","Fat4","Fgd2","Fgd4","Fgd6","Fgfr2","Fnbp1l","Gas7","Gdpd5","Gja1","Gsn","Ift122","Ift140","Ift172","…
GO:0050818	5	regulation of coagulation	23	92	11.127	0.000482062	0.00335093	["Adamts18","Apoe","Edn1","Enpp4","F2r","F3","Hpse","Lbh","Lyn","Nfe2l2","Pdgfa","Plat","Plaur","Plek","Prdx2","Prkcd","Psen2","Ptprj","Serpine1","Serping1","Syk","Thbd","Usf1"]
GO:0000082	7	G1/S transition of mitotic cell cycle	34	157	18.9886	0.000491486	0.00340871	["Acvr1b","Cacul1","Cdk2","Cdkn1a","Cdt1","Cul1","E2f1","Eif4e","Gspt1","Inhba","Nfatc1","Pcna","Plk3","Ppp3ca","Psma2","Psma3","Psma4","Psma5","Psma6","Psmb4","Psmb7","Psmc1","Psmc2","Psmc4","Psmc6","Psmd1","Psmd10","Psmd12","Psmd5","Psmd7","Rbbp8","Rhou","Rpa1","Rps6kb1"]
GO:0044843	6	cell cycle G1/S phase transition	34	157	18.9886	0.000491486	0.00340871	["Acvr1b","Cacul1","Cdk2","Cdkn1a","Cdt1","Cul1","E2f1","Eif4e","Gspt1","Inhba","Nfatc1","Pcna","Plk3","Ppp3ca","Psma2","Psma3","Psma4","Psma5","Psma6","Psmb4","Psmb7","Psmc1","Psmc2","Psmc4","Psmc6","Psmd1","Psmd10","Psmd12","Psmd5","Psmd7","Rbbp8","Rhou","Rpa1","Rps6kb1"]
GO:1903531	6	negative regulation of secretion by cell	39	188	22.7379	0.000495194	0.00342997	["Abcc8","Braf","C5ar2","Cd300a","Edn1","Entpd1","Erp29","F2r","Fn1","Hadh","Il1b","Il1f5","Il6","Inhba","Lif","Map4k4","Midn","Nlrp3","Notch1","Nucb2","Osm","P2ry1","Pde3b","Pparg","Ppp3ca","Ptgs1","Rab11fip5","Rap1b","Rest","Rhbdf2","Srcin1","Srgn","Stxbp3","Syt4","Tnf","Tnfrsf21","Tnfsf4","Trim9","Ucp2"]
GO:0002708	8	positive regulation of lymphocyte mediated immunity	21	81	9.79664	0.000495669	0.00342997	["B2m","Cadm1","Cd28","Cd40","Fadd","Fcgr3","Fzd5","Il12a","Il12b","Il1b","Il23a","Nod2","P2rx7","Pnp","Pvr","Rasgrp1","Sash3","Tgfb1","Tnf","Tnfsf13","Tnfsf4"]
GO:0060627	5	regulation of vesicle-mediated transport	78	446	53.942	0.000496436	0.00343139	["Abl2","Adora2b","Arrb1","B4galt1","Braf","Cacna1a","Camk1d","Cd300a","Cftr","Chmp6","Coro1a","Csk","Cyba","Ehd1","Ezr","Fcgr2b","Fcgr3","Fes","Hck","Hip1","Il1b","Ldlrap1","Lman2","Lyn","Map2k1","Mertk","Mfge8","Mvb12a","Myo5a","Ndrg4","Nedd4l","Nod2","Notch1","Nr1h2","Nrp1","Ophn1","Pink1","Pld2","Pparg","Ppp3ca","Prkd1","Ptx3","Rab10","Rab20","Rab3d","Rab40c","Rab4a","Rap1b","Rapgef4","Rasef"…
GO:0032271	6	regulation of protein polymerization	33	151	18.2629	0.000497315	0.0034336	["Arl2","Arpc4","Baiap2","Capg","Ccl24","Cdc42ep2","Cdc42ep3","Coro1a","Csf3","Eln","Fes","Fkbp4","Gda","Gsn","Hck","Hcls1","Icam1","Jmy","Map1b","Map3k1","Mapk8","Myadm","Nck1","Nck2","Pik3r2","Prkcd","Rgs2","Sptbn1","Tenm1","Tmsb10","Twf1","Twf2","Vasp"]
GO:0050796	7	regulation of insulin secretion	42	207	25.0359	0.000500972	0.00345354	["Abcc8","Arl2","Arrb1","Cacna1a","Ccl5","Cd38","Cftr","Cpt1a","G6pc2","Gja1","Glul","Hadh","Hnf4a","Ica1","Il1b","Itpr3","Jak2","Kcns3","Lrp5","Map4k4","Marcks","Mcu","Midn","Nos2","Pck2","Pde3b","Pfkfb2","Pfkm","Phpt1","Ppp3ca","Prkacb","Rapgef4","Rest","Serp1","Sidt2","Slc2a1","Slc8b1","Sybu","Syt7","Tcf7l2","Tnf","Ucp2"]
GO:0048520	6	positive regulation of behavior	32	145	17.5372	0.000501329	0.00345354	["Adam17","Adora2a","Camk1d","Casp1","Ccl3","Ccl5","Cmklr1","Cxcl1","Cxcl9","Cxcr3","Edn1","F3","Fn1","Gja1","Il16","Il1b","Il23a","Il6","Kdr","Lpar1","Mef2c","Megf8","Nrp1","Pdgfrb","Pf4","Prkd1","Ptprj","S1pr1","Serpine1","Smad3","Tgfb1","Vegfb"]
GO:0070542	5	response to fatty acid	24	98	11.8527	0.000508571	0.00349949	["Aanat","Akr1c18","Aldh2","Ass1","Cpt1a","E2f1","Edn1","Fn1","Gnb1","Gng2","Hmgcl","Hsd17b3","Il1b","Mbp","P2ry6","Pid1","Pparg","Ptgs1","Src","Tgfbr1","Tlr2","Tnc","Tnfsf4","Ucp2"]
GO:0090304	5	nucleic acid metabolic process	478	3462	418.716	0.00051013	0.00350629	["Aarsd1","Acd","Aebp1","Aes","Aff1","Ago3","Ago4","Ahctf1","Ahr","Akna","Ang","Anp32a","Ap1s1","Ap5s1","Ap5z1","Apobec1","Arhgap22","Arid1b","Arid5a","Arid5b","Arrb1","Ascc1","Ascc3","Atf3","Atf6b","Atg7","Atm","Atmin","BC094916","Babam1","Batf","Batf2","Baz1a","Bcas3","Bcl3","Bcl9l","Bdp1","Bend6","Bmi1","C77370","Calcoco1","Casp3","Cbx4","Cbx6","Cbx7","Cbx8","Cc2d1a","Cc2d1b","Ccar1","Ccdc59",…
GO:0006672	6	ceramide metabolic process	18	65	7.8615	0.00052162	0.00358125	["Cerk","Cers6","Cln6","Cln8","Gla","Gm2a","Hexb","Htra2","Itgb8","Naga","P2rx7","Pla2g15","Sgpl1","Smpd1","Sptlc2","St6galnac6","St8sia2","Ugcg"]
GO:0032680	7	regulation of tumor necrosis factor production	25	104	12.5784	0.00053011	0.00363546	["Acp5","Bcl3","C5ar2","Ccl3","Cyba","Fadd","Fcgr3","Il12b","Il18","Il23a","Irak3","Jak2","Myd88","Nlrc3","Nod1","Nod2","Pf4","Rasgrp1","Sash3","Tlr1","Tlr2","Tlr9","Tnfrsf8","Trim30a","Zc3h12a"]
GO:0031669	5	cellular response to nutrient levels	36	170	20.5609	0.000534104	0.00365675	["Angptl4","Atf3","Atg2a","Atg7","Ccl5","Ctsl","Eln","Fads1","Fbxo22","Gas2l1","Glul","Hfe","Higd1a","Icam1","Lcn2","Ltc4s","Mtr","Nbr1","Nfe2l2","Nos2","Optn","Pdk2","Pik3r4","Pparg","Prkcd","Rptor","Rragd","Sh3glb1","Slc2a1","Slc38a2","Tcf7l2","Tnc","Ucp2","Ulk1","Upp1","Wdr45"]
GO:0030193	6	regulation of blood coagulation	22	87	10.5223	0.000535003	0.00365675	["Adamts18","Apoe","Edn1","Enpp4","F2r","F3","Hpse","Lbh","Lyn","Nfe2l2","Pdgfa","Plat","Plaur","Plek","Prdx2","Prkcd","Ptprj","Serpine1","Serping1","Syk","Thbd","Usf1"]
GO:1900046	5	regulation of hemostasis	22	87	10.5223	0.000535003	0.00365675	["Adamts18","Apoe","Edn1","Enpp4","F2r","F3","Hpse","Lbh","Lyn","Nfe2l2","Pdgfa","Plat","Plaur","Plek","Prdx2","Prkcd","Ptprj","Serpine1","Serping1","Syk","Thbd","Usf1"]
GO:0042558	5	pteridine-containing compound metabolic process	12	35	4.23312	0.000545114	0.00372171	["Aldh1l1","Folh1","Gch1","Mthfd1","Mthfd1l","Mthfd2l","Mtr","Qdpr","Shmt2","Slc19a1","Slc46a1","Spr"]
GO:0072524	5	pyridine-containing compound metabolic process	26	110	13.3041	0.00054694	0.00373002	["Apoa1bp","Eno1","Eno1b","Fmo2","Gpd1l","Gpd2","H6pd","Hk2","Hk3","Idh1","Kcnab2","Nampt","Nmnat3","Nox1","Pck2","Pdxk","Pfkfb2","Pfkfb3","Pfkfb4","Pfkm","Pgls","Pnp","Pnpo","Prdx5","Taldo1","Yjefn3"]
GO:0006820	5	anion transport	84	489	59.1427	0.000551586	0.00375753	["Abca1","Abca12","Abca13","Abcc1","Abcc3","Abcc5","Abcd1","Acsl4","Acsl5","Ank","Apoe","Aqp9","Atp10a","Atp8b1","Cacna1a","Cftr","Clcn5","Clic6","Cln8","Cpt1a","Crot","Enpp1","Gabrb2","Gabrp","Gipc1","Gja1","Mfsd10","Mfsd5","Nfkbie","P2rx7","P2ry6","Pctp","Pcyox1","Plin2","Plscr4","Pparg","Pqlc2","Prelid2","Prkag2","Prkcd","Scarb1","Serinc5","Sfxn3","Sfxn5","Sh3bp4","Slc12a3","Slc12a7","Slc12a9"…
GO:0010332	6	response to gamma radiation	17	60	7.25677	0.00055302	0.00375894	["Apobec1","Atm","Bak1","Chek2","Cxcl1","Cyba","Dcun1d3","Egr1","Entpd1","Gpx1","Il1a","Il1b","Pnp","Socs3","Tlk2","Top1","Trim13"]
GO:0032677	6	regulation of interleukin-8 production	17	60	7.25677	0.00055302	0.00375894	["Adam17","Arrb1","Bcl3","C5ar2","F2r","Fadd","Hyal2","Il18","Il1b","Map2k5","Nlrp10","Nod2","Otud7b","Serpine1","Tlr2","Tlr9","Tnf"]
GO:0032733	7	positive regulation of interleukin-10 production	10	26	3.1446	0.00055603	0.00376271	["Bcl3","Cd274","Il12b","Il20rb","Il23a","Nod2","Sash3","Tlr2","Tlr9","Tnfsf4"]
GO:0046835	5	carbohydrate phosphorylation	10	26	3.1446	0.00055603	0.00376271	["Gnptg","Hk2","Hk3","Khk","Nagk","Pfkfb2","Pfkfb3","Pfkfb4","Pfkm","Pomk"]
GO:0070723	7	response to cholesterol	10	26	3.1446	0.00055603	0.00376271	["Abca1","Acp5","Acsl5","Apoe","Ccl3","Ccl5","Inhba","Tgfb1","Tgfbr1","Tgfbr2"]
GO:0098657	5	import into cell	10	26	3.1446	0.00055603	0.00376271	["Cln8","Hfe","Itga4","Slc11a2","Slc31a1","Slc7a2","Slc7a4","Slc9a1","Steap3","Steap4"]
GO:0050777	6	negative regulation of immune response	28	122	14.7554	0.000567816	0.00383681	["Ambp","Cd300a","Cd55","Clec2d","Fcgr2b","Fcrlb","Gpx1","Il12b","Il20rb","Inpp5d","Irak3","Lyn","Ndfip1","Nlrx1","Nmi","Nod2","Nr1h2","Pparg","Psmb4","Ptpn2","Rps19","Samsn1","Serping1","Spink5","Tgfb1","Thoc1","Tnf","Tnfsf4"]
GO:0007015	6	actin filament organization	38	183	22.1332	0.000568767	0.00383681	["Abl2","Ang","Arpc4","Arrb1","Baiap2","Casp4","Cdc42ep2","Cobl","Coro1a","Coro7","Diaph2","Eln","Ezr","Fat1","Fscn1","Gas7","Gsn","Hcls1","Inppl1","Itgb5","Jak2","Jmy","Kctd13","Lcp1","Marcks","Mical1","Msrb2","Mtss1","Mylk","Nck1","Nck2","Pdcd10","Rnd1","Src","Tmsb10","Ush1c","Vasp","Wipf1"]
GO:0072522	6	purine-containing compound biosynthetic process	32	146	17.6581	0.000568857	0.00383681	["Acot7","Adcy3","Adcy7","Adcy9","Adm","Adora2a","Adssl1","Aprt","Atp5d","Atp5g1","Atp6v0a1","Calcrl","Chchd10","Coasy","Dcakd","Dguok","Gmpr","Gucy2e","Guk1","Mthfd1","Mthfd2l","Nme3","Nme4","Pank1","Pnp","Pnp2","Prkag2","Prps2","Slc25a13","Slc35b2","Tgfb1","Vps9d1"]
GO:0006887	5	exocytosis	54	286	34.5906	0.000569646	0.00383791	["Abca12","Abcc4","Anxa3","Apba2","Cacna1a","Calu","Ccl3","Ccl5","Coro1a","Exoc3l4","Fn1","Gnpda1","Habp4","Hck","Itgb3","Itsn1","Lat2","Lyn","Milr1","Myo1f","Myo5a","P2rx7","Pdgfa","Pf4","Pik3c2a","Plek","Psap","Rab11fip5","Rab3d","Rapgef4","Rasgrp1","Rims2","Scamp1","Scamp5","Scg3","Serpine1","Serping1","Srcin1","Srgn","Steap3","Stx11","Stxbp3","Syt16","Syt4","Syt7","Tgfb1","Tnfaip2","Trim36","…
GO:1904018	6	positive regulation of vasculature development	31	140	16.9325	0.000572763	0.00385468	["Adm","Angpt2","Angptl4","Anxa3","Ccl24","Ccl5","Cib1","Cxcr3","Cyp1b1","Cysltr1","Ecm1","Egr1","Erap1","F3","Flt1","Hyal1","Il1a","Il1b","Itgb3","Kdr","Mmp9","Mtdh","Pik3r6","Ppp1r16b","Prkd1","Rapgef2","Serpine1","Srpx2","Tgfbr2","Vash2","Vegfb"]
GO:0002250	4	adaptive immune response	30	134	16.2068	0.00057413	0.00385964	["Adam17","Bcl3","Cadm1","Cd55","Crlf2","Ctsc","Ctsl","Ebi3","Fcgr2b","Fcgr3","H60b","Il12b","Il18","Inpp5d","Klhl6","Mef2c","Msh2","Myd88","Nfkb2","Pik3c2a","Pirb","Prkcd","Relb","Sla2","Stx11","Syk","Tgfb1","Tlr6","Tnfrsf21","Tnfsf13"]
GO:0000165	5	MAPK cascade	41	202	24.4311	0.000575773	0.00386644	["Adora2b","Arhgef6","Braf","Ccl3","Ccl5","Dok1","Dusp3","Dusp7","Egfr","Fgf12","Il18","Il1b","Irak2","Map2k1","Map2k5","Map3k1","Map3k11","Map3k14","Map3k3","Map3k8","Map3k9","Map4k4","Mapk6","Mapk8","Mef2c","Mink1","Myd88","Ndst1","Nod1","Nod2","Nrg1","Pebp1","Rapgef2","Rasgrp3","Sh2d3c","Stk3","Tab2","Taok1","Tgfb1","Tnf","Tnfrsf19"]
GO:0032768	6	regulation of monooxygenase activity	16	55	6.65204	0.000578474	0.00388033	["Acvr2a","Apoe","Arg2","Cnr2","Egfr","Gch1","Gfi1","Gla","Il1b","Nfkb1","Nod1","Npr3","Scarb1","Spr","Tnf","Zdhhc21"]
GO:0002791	7	regulation of peptide secretion	48	247	29.8737	0.000581873	0.00389886	["Abcc8","Arhgef7","Arl2","Arrb1","Cacna1a","Ccl5","Cd38","Cftr","Cpt1a","G6pc2","Gja1","Glul","Hadh","Hmga2","Hnf4a","Ica1","Il1b","Itpr3","Jak2","Kcns3","Lif","Lrp5","Map4k4","Marcks","Mcu","Midn","Nos2","Nucb2","Pck2","Pde3b","Pfkfb2","Pfkm","Phpt1","Pparg","Ppp3ca","Prkacb","Rapgef4","Rest","S100a8","Serp1","Sidt2","Slc2a1","Slc8b1","Sybu","Syt7","Tcf7l2","Tnf","Ucp2"]
GO:0031145	8	anaphase-promoting complex-dependent proteasomal ubiquitin-dependent protein catabolic process	21	82	9.91759	0.000591454	0.00395442	["Anapc10","Anapc11","Anapc2","Cdk2","Cul1","Psma2","Psma3","Psma4","Psma5","Psma6","Psmb4","Psmb7","Psmc1","Psmc2","Psmc4","Psmc6","Psmd1","Psmd10","Psmd12","Psmd5","Psmd7"]
GO:0032273	7	positive regulation of protein polymerization	21	82	9.91759	0.000591454	0.00395442	["Arl2","Arpc4","Baiap2","Ccl24","Cdc42ep2","Cdc42ep3","Csf3","Fes","Gda","Gsn","Hck","Icam1","Jmy","Map1b","Map3k1","Mapk8","Nck1","Nck2","Rgs2","Tenm1","Vasp"]
GO:0006607	6	NLS-bearing protein import into nucleus	7	14	1.69325	0.000593668	0.00396059	["Cblb","Dag1","Fyb","Kpna3","Nckipsd","Rere","Trps1"]
GO:0032695	7	negative regulation of interleukin-12 production	7	14	1.69325	0.000593668	0.00396059	["Acp5","Cmklr1","Irak3","Mefv","Nfkb1","Nod2","Tlr2"]
GO:0032368	6	regulation of lipid transport	24	99	11.9737	0.000595506	0.00396422	["Abca1","Abca12","Abca2","Acsl4","Acsl5","Apoe","Edn1","Il1a","Il1b","Itgb3","Lamtor1","Lipg","Lrp1","Nfkb1","Nr1h2","Nucb2","Nus1","P2rx7","P2ry2","Pltp","Pparg","Prkcd","Repin1","Syk"]
GO:0055072	10	iron ion homeostasis	24	99	11.9737	0.000595506	0.00396422	["Atp6v0a1","Atp6v0d2","Atp6v1a","Atp6v1e1","B2m","Cp","Fbxl5","Fth1","Ftl1","Heph","Hfe","Hyal2","Lcn2","Mcoln1","Ndfip1","Sfxn3","Sfxn5","Slc11a2","Slc25a37","Slc46a1","Steap3","Steap4","Tfr2","Ttc7"]
GO:0008154	7	actin polymerization or depolymerization	14	45	5.44258	0.000597882	0.00397142	["Ang","Arpc4","Cobl","Coro7","Diaph2","Gas7","Gsn","Hcls1","Jak2","Mical1","Msrb2","Mtss1","Vasp","Wipf1"]
GO:0071549	7	cellular response to dexamethasone stimulus	14	45	5.44258	0.000597882	0.00397142	["Arg1","Arg2","Ass1","Bmi1","Casp9","Egfr","Eln","Hmbs","Il6","Jak2","Nr3c1","Plat","Serpine1","Tgfb1"]
GO:0045926	5	negative regulation of growth	47	241	29.148	0.000608679	0.00403439	["Aatk","Acvr1b","Adam15","Adipor2","Cdhr2","Cdkn1a","Dcbld2","Dcun1d3","Dnajc2","Draxin","Eno1","Enpp1","Flcn","Foxk1","Gas2l1","Gja1","Hnf4a","Hyal1","Hyal2","Ifrd1","Il12b","Ing4","Inhba","Irf8","Kcnk2","Myd88","Ndrg3","Ndufa13","Nf2","Nod2","Nrp1","Pparg","Ptprj","Sav1","Sertad3","Sh3bp4","Smad3","Smarca2","Stk3","Tcf7l2","Tgfb1","Tgfbr2","Tlr2","Tnf","Ulk1","Ulk2","Zc3h12d"]
GO:0090276	6	regulation of peptide hormone secretion	47	241	29.148	0.000608679	0.00403439	["Abcc8","Arhgef7","Arl2","Arrb1","Cacna1a","Ccl5","Cd38","Cftr","Cpt1a","G6pc2","Gja1","Glul","Hadh","Hmga2","Hnf4a","Ica1","Il1b","Itpr3","Jak2","Kcns3","Lif","Lrp5","Map4k4","Marcks","Mcu","Midn","Nos2","Nucb2","Pck2","Pde3b","Pfkfb2","Pfkm","Phpt1","Pparg","Ppp3ca","Prkacb","Rapgef4","Rest","Serp1","Sidt2","Slc2a1","Slc8b1","Sybu","Syt7","Tcf7l2","Tnf","Ucp2"]
GO:0030307	6	positive regulation of cell growth	35	165	19.9561	0.000612794	0.00405728	["Acsl4","Adam17","Akap6","Anapc2","Apoe","Cd38","Cib1","Commd5","Cpne6","Cyba","Extl3","Fn1","H3f3a","H3f3b","Hyal1","Ino80","Limk1","Map1b","Map2k5","Megf8","Mtpn","Ncoa3","Ndel1","Nedd4l","Nr3c1","Nrg1","Nrp1","Psmd10","Rims2","S100a8","Slc9a1","Syt4","Tgfbr1","Trpv2","Twf2"]
GO:0001959	6	regulation of cytokine-mediated signaling pathway	25	105	12.6993	0.000617091	0.00408132	["Agpat1","Agpat2","Ccl5","Crebrf","Ecm1","Edn1","Fadd","Gfi1","Ifnar2","Il1f5","Il6st","Irak2","Irak3","Irf3","Jak2","Nr1h2","Padi2","Pparg","Ptpn2","Pxdn","Rffl","Socs3","Syk","Trem2","Zbp1"]
GO:0036230	5	granulocyte activation	9	22	2.66082	0.000618872	0.00408429	["Anxa3","Ccl3","Ccl5","Cxcr4","Myo1f","Prkcd","Stx11","Stxbp3","Syk"]
GO:0090322	7	regulation of superoxide metabolic process	9	22	2.66082	0.000618872	0.00408429	["Acp5","Cxcl1","Cyba","Egfr","Il18","Nfe2l2","Prkcd","Syk","Tgfb1"]
GO:0032845	5	negative regulation of homeostatic process	26	111	13.425	0.000633367	0.00417097	["Acd","Ccl3","Cd38","Cd44","Csk","F2r","Fadd","Fcgr2b","Flcn","Gas2l1","Il18","Inpp5d","Kitl","Klf13","Ldb1","Lmo2","Mafb","Map4k4","Mcoln1","P2rx7","Ryr2","Tgfb1","Tnfsf4","Tpcn2","Tsc22d3","Ucp2"]
GO:0071156	7	regulation of cell cycle arrest	26	111	13.425	0.000633367	0.00417097	["Atm","Casp2","Cdk2","Cdkn1a","Hmga2","Hmgn5","Med25","Psma2","Psma3","Psma4","Psma5","Psma6","Psmb4","Psmb7","Psmc1","Psmc2","Psmc4","Psmc6","Psmd1","Psmd10","Psmd12","Psmd5","Psmd7","Rfwd2","Tgfb1","Uhrf2"]
GO:0001889	4	liver development	33	153	18.5048	0.000635649	0.0041815	["Ahr","Aldh1a2","Aldh2","Ang","Arg1","Arid5b","Ass1","Atg7","Cadm1","Cebpa","Cobl","Cp","Dbp","Egfr","Fscn1","Hfe","Hhex","Hmgcl","Hnrnpd","Hp","Icmt","Lsr","Mpst","Notch1","Notch2","Onecut2","Pkd1","Qdpr","Slco2b1","Smad3","Ucp2","Urod","Vwf"]
GO:0006488	6	dolichol-linked oligosaccharide biosynthetic process	18	66	7.98245	0.00063721	0.00418728	["Alg10b","Alg11","Cmas","Ctsa","Dolpp1","Dpm2","Dpm3","Gfpt2","Mpdu1","Neu1","Pmm1","Slc17a5","St3gal1","St3gal3","St3gal4","St6gal1","St6galnac6","St8sia2"]
GO:0006869	4	lipid transport	48	248	29.9947	0.000638463	0.00419103	["Abca1","Abca12","Abca13","Abca15","Abca2","Abcc1","Abcc3","Abcd1","Acsl4","Acsl5","Apoe","Aqp9","Atp10a","Atp8b1","Cftr","Cln8","Cpt1a","Crot","Esyt1","Gltp","Gm2a","Inhba","Lipg","Lrp10","Nme4","Npc1","Nus1","Osbpl11","Osbpl8","P2rx7","Pctp","Plin2","Plscr4","Pltp","Pparg","Prelid2","Prkag2","Psap","Scarb1","Selm","Slc27a1","Slco2b1","Slco3a1","Soat1","Spns1","Spns2","Stard3","Stard5"]
GO:0009260	7	ribonucleotide biosynthetic process	31	141	17.0534	0.000650584	0.00426602	["Acot7","Adcy3","Adcy7","Adcy9","Adm","Adora2a","Adssl1","Aprt","Atp5d","Atp5g1","Atp6v0a1","Calcrl","Chchd10","Coasy","Dcakd","Dhodh","Gucy2e","Guk1","Nme3","Nme4","Pank1","Pnp","Prkag2","Prps2","Slc25a13","Slc35b2","Tgfb1","Uck1","Upp1","Uprt","Vps9d1"]
GO:0032732	7	positive regulation of interleukin-1 production	11	31	3.74933	0.00066239	0.00433417	["Casp1","Casp4","Ccl3","Il18","Jak2","Nlrp3","Nod1","Nod2","P2rx7","Smad3","Trim16"]
GO:2000249	7	regulation of actin cytoskeleton reorganization	11	31	3.74933	0.00066239	0.00433417	["Abl2","Baiap2","Bcas3","Csf3","Ctsl","F11r","Fes","Hck","Hcls1","Phpt1","Tgfb1"]
GO:0006767	6	water-soluble vitamin metabolic process	23	94	11.3689	0.00066752	0.00435843	["Abcc1","Acp5","Coasy","Enpp1","Gsto1","Gulo","Hlcs","Mccc2","Mocos","Mthfd1","Mtr","Nampt","Nmnat3","Pank1","Pccb","Pdxk","Pnpo","Slc19a1","Slc2a1","Slc2a3","Slc46a1","Slc5a6","Vnn3"]
GO:0048514	4	blood vessel morphogenesis	23	94	11.3689	0.00066752	0.00435843	["Ahr","Amot","Angpt2","Apoe","Col4a1","Cyp1b1","Edn1","Flt1","Gja1","Heg1","Lama1","Lrp1","Lrp5","Notch1","Notch3","Nrp1","Pdgfrb","Prdm1","Rbpj","Six1","Syk","Tgfbr1","Zmiz1"]
GO:0048732	4	gland development	60	328	39.6703	0.000677945	0.00442178	["Ahr","Aldh1a2","Aldh2","Ang","Arg1","Arid5b","Ass1","Atg7","B4galt1","Cadm1","Cbx7","Cebpa","Cela1","Cobl","Cp","Ctc1","Cyp1b1","Dbp","Duox2","Egfr","Erbb4","Fadd","Fgfr2","Fkbp4","Fscn1","Hfe","Hhex","Hmga2","Hmgcl","Hnrnpd","Hp","Icmt","Lsr","Mafb","Mpst","Notch1","Notch2","Nr3c1","Nrg1","Nrg3","Onecut2","Pdgfrb","Pkd1","Prdx2","Psen2","Qdpr","Rbpj","Six1","Six4","Slco2b1","Smad3","Tcf7l2","T…
GO:0008630	6	intrinsic apoptotic signaling pathway in response to DNA damage	21	83	10.0385	0.000702879	0.00457138	["Atm","Bag6","Bak1","Bcl2a1b","Bcl3","Casp2","Casp9","Cdkn1a","Chek2","E2f1","Fnip2","Htra2","Ier3","Ifi204","Ikbke","Msh2","Nupr1","Pnp","Shisa5","Tnf","Tnfrsf1b"]
GO:0010632	5	regulation of epithelial cell migration	34	160	19.3514	0.000703117	0.00457138	["Amot","Angpt2","Anxa3","Apoe","Arsb","Bcas3","Bmper","Cib1","Edn1","Glipr2","Hdac5","Hyal1","Itgb3","Kdr","Krit1","Map2k5","Mmp9","Notch1","Nrp1","Nrp2","Pdcd10","Prcp","Prkd1","Ptprg","Scarb1","Sema4a","Serpine1","Sh3bgrl3","Sp100","Src","Srpx2","Tdgf1","Tgfb1","Tgfbr2"]
GO:1903052	9	positive regulation of proteolysis involved in cellular protein catabolic process	34	160	19.3514	0.000703117	0.00457138	["Anapc10","Anapc11","Anapc2","Bag6","Ccdc22","Cdk5rap3","Cebpa","Csnk1e","Ctsc","Cul1","Fbxo22","Hspbp1","Plk3","Psen2","Psma2","Psma3","Psma4","Psma5","Psma6","Psmb4","Psmb7","Psmc1","Psmc2","Psmc4","Psmc6","Psmd1","Psmd10","Psmd12","Psmd5","Psmd7","Rfwd2","Stub1","Sumo3","Zfand2a"]
GO:0032092	6	positive regulation of protein binding	19	72	8.70813	0.000712226	0.0046208	["Abl2","Arhgef7","Arrb1","Bambi","Csf3","Epb41","Krit1","Lfng","Mef2c","Mfng","Mmp9","Nrp1","Pkd1","Plxnd1","Rapgef2","Sppl3","Stk3","Tcf7l2","Tmem173"]
GO:0070664	7	negative regulation of leukocyte proliferation	19	72	8.70813	0.000712226	0.0046208	["Atm","Casp3","Cblb","Cd274","Cd300a","D930015E06Rik","Fcgr2b","Il20rb","Inpp5d","Lyn","Ndfip1","Peli1","Pkn1","Prdm1","Sox11","Tgfb1","Tnfrsf13b","Tnfrsf21","Zc3h12d"]
GO:0032787	7	monocarboxylic acid metabolic process	91	542	65.5528	0.000714131	0.00462826	["Abcc1","Abcc3","Abcd1","Acaa2","Acads","Acot1","Acot2","Acot7","Acox3","Acsf2","Acsl4","Acsl5","Acss1","Adipor2","Aldh1a2","Aldh4a1","Alox5ap","Atp8b1","Cbr1","Ch25h","Chst12","Chst14","Cotl1","Cpt1a","Crat","Crot","Cyp1b1","Cyp27a1","Cyp2j8","Cyp4f13","Dagla","Daglb","Decr1","Dhrs9","Dld","Dsel","Ech1","Edn1","Egln1","Eno1","Eno1b","Fads1","Gcdh","Gpx1","Hacd4","Hadh","Hk2","Hk3","Hlcs","Hpgds…
GO:0071398	6	cellular response to fatty acid	16	56	6.77299	0.000720065	0.00466179	["Akr1c18","Aldh2","Ass1","Cpt1a","E2f1","Edn1","Fn1","Gnb1","Gng2","Il1b","P2ry6","Pid1","Pparg","Src","Tnc","Tnfsf4"]
GO:0032715	7	negative regulation of interleukin-6 production	12	36	4.35406	0.000728512	0.00470654	["Arrb1","C5ar2","Csk","Il1f5","Inpp5d","Irak3","Nlrc3","Nlrx1","Tlr9","Tnf","Trim30a","Zc3h12a"]
GO:0033189	6	response to vitamin A	12	36	4.35406	0.000728512	0.00470654	["Aldh1a2","Arg1","Cd44","Dnmt1","Dnmt3a","Fads1","Gsr","Ltc4s","Map1b","Mmp9","Muc5ac","Pparg"]
GO:0090287	5	regulation of cellular response to growth factor stimulus	40	198	23.9473	0.000734337	0.00473918	["Adam17","Adamts12","Bambi","Bcl9l","Fam89b","Fbn1","Fbn2","Fgfr2","Flcn","Flt1","Gipc1","Hhex","Htra1","Il1b","Itgb3","Kdr","Mecom","Nedd4l","Onecut2","Peg10","Ski","Skil","Skor1","Smad3","Snx25","Snx6","Sox11","Spry1","Stub1","Sulf2","Tcf7l2","Tdgf1","Tgfb1","Tgfbr1","Tgfbr2","Ulk1","Utrn","Vegfb","Xdh","Zfp703"]
GO:0009790	4	embryo development	69	390	47.169	0.000736111	0.00474563	["Acvr1b","Amot","Apba2","Aplp2","Bag6","Bmi1","Brk1","C2cd3","Csrp2bp","Ddx5","Dnmt3l","Dusp3","Edn1","Eef1e1","Eif2s2","Eno1","Epn1","Erf","Esrrb","Fgfr2","Flcn","Fut8","Gja1","Gna12","Gtf2i","Heg1","Hhex","Hmgcl","Icmt","Inpp5b","Kat2a","Maff","Mecom","Mfsd7b","Mgat1","Msh2","Mtss1","Myh6","Ncor2","Ndst1","Notch1","Notch2","Nrg1","Nrg3","P2ry2","Pdgfc","Pdgfrb","Pkd1","Plod3","Prdm1","Psen2","…
[truncated: 1,609 more rows]

## Sheet: MyD88 Independent
ID	Level	Title	Number of hits	Group size	Expected hits	P-value	Adjusted P-value	Hit names
[truncated: 950 more rows]

## Sheet: MyD88 Privative
ID	Level	Title	Number of hits	Group size	Expected hits	P-value	Adjusted P-value	Hit names
[truncated: 445 more rows]
