# Supplementary material for: Macrophage mediated recognition and clearance of Borrelia burgdorferi elicits MyD88-dependent and -independent phagosomal signals that contribute to phagocytosis and inflammation
Source: BMC Immunol. 2021 May 17;22:32. doi: 10.1186/s12865-021-00418-8 (PMC8127205; doi:10.1186/s12865-021-00418-8)
Supplement: Supplementary file 2 — Additional file 2: Supplemental File 2. Gene ontology analysis of identified transcription factors. [file 12865_2021_418_MOESM2_ESM.xlsx]

## Sheet: MyD88 Dependent
ID	Level	Title	Number of hits	Group size	Expected hits	P-value	Adjusted P-value	Hit names
GO:0006366	7	transcription from RNA polymerase II promoter	46	891	2.14335	8.5796e-57	7.3305e-54	["Bcl6","Cbfb","Egr2","Foxc1","Foxf2","Foxi1","Foxj2","Foxj3","Foxk1","Foxo1","Foxo4","Foxp3","Gata3","Hnf4a","Irf1","Irf2","Irf3","Irf4","Irf7","Irf9","Klf4","Lhx3","Nhlh1","Nr1h3","Nr1h4","Nr1i2","Nr1i3","Nr2f2","Pbx1","Pou2f1","Pou5f1","Prdm1","Rara","Rreb1","Rxra","Sox30","Srebf1","Stat5a","Stat5b","Tbx15","Tbx5","Trp53","Zbtb3","Zeb1","Zfp90","Zic1"]
GO:0006351	6	transcription, DNA-templated	54	2110	5.07573	1.89805e-56	7.3305e-54	["Bbx","Bcl6","Cbfb","Dmrt2","Egr2","Foxc1","Foxf2","Foxg1","Foxi1","Foxj2","Foxj3","Foxk1","Foxo1","Foxo4","Foxp3","Gata3","Hnf4a","Irf1","Irf2","Irf3","Irf4","Irf5","Irf7","Irf8","Irf9","Klf4","Lhx3","Mecom","Nhlh1","Nr1h3","Nr1h4","Nr1i2","Nr1i3","Nr2f2","Pbx1","Pou2f1","Pou5f1","Prdm1","Rara","Rreb1","Rxra","Sox30","Srebf1","Stat5a","Stat5b","Tbx15","Tbx5","Trp53","Zbtb3","Zbtb41","Zeb1","Zfp…
GO:0097659	7	nucleic acid-templated transcription	54	2111	5.07814	1.94787e-56	7.3305e-54	["Bbx","Bcl6","Cbfb","Dmrt2","Egr2","Foxc1","Foxf2","Foxg1","Foxi1","Foxj2","Foxj3","Foxk1","Foxo1","Foxo4","Foxp3","Gata3","Hnf4a","Irf1","Irf2","Irf3","Irf4","Irf5","Irf7","Irf8","Irf9","Klf4","Lhx3","Mecom","Nhlh1","Nr1h3","Nr1h4","Nr1i2","Nr1i3","Nr2f2","Pbx1","Pou2f1","Pou5f1","Prdm1","Rara","Rreb1","Rxra","Sox30","Srebf1","Stat5a","Stat5b","Tbx15","Tbx5","Trp53","Zbtb3","Zbtb41","Zeb1","Zfp…
GO:0032774	6	RNA biosynthetic process	54	2282	5.48949	1.37615e-54	3.88419e-52	["Bbx","Bcl6","Cbfb","Dmrt2","Egr2","Foxc1","Foxf2","Foxg1","Foxi1","Foxj2","Foxj3","Foxk1","Foxo1","Foxo4","Foxp3","Gata3","Hnf4a","Irf1","Irf2","Irf3","Irf4","Irf5","Irf7","Irf8","Irf9","Klf4","Lhx3","Mecom","Nhlh1","Nr1h3","Nr1h4","Nr1i2","Nr1i3","Nr2f2","Pbx1","Pou2f1","Pou5f1","Prdm1","Rara","Rreb1","Rxra","Sox30","Srebf1","Stat5a","Stat5b","Tbx15","Tbx5","Trp53","Zbtb3","Zbtb41","Zeb1","Zfp…
GO:0034654	5	nucleobase-containing compound biosynthetic process	54	2570	6.18229	9.05707e-52	2.04509e-49	["Bbx","Bcl6","Cbfb","Dmrt2","Egr2","Foxc1","Foxf2","Foxg1","Foxi1","Foxj2","Foxj3","Foxk1","Foxo1","Foxo4","Foxp3","Gata3","Hnf4a","Irf1","Irf2","Irf3","Irf4","Irf5","Irf7","Irf8","Irf9","Klf4","Lhx3","Mecom","Nhlh1","Nr1h3","Nr1h4","Nr1i2","Nr1i3","Nr2f2","Pbx1","Pou2f1","Pou5f1","Prdm1","Rara","Rreb1","Rxra","Sox30","Srebf1","Stat5a","Stat5b","Tbx15","Tbx5","Trp53","Zbtb3","Zbtb41","Zeb1","Zfp…
GO:0018130	5	heterocycle biosynthetic process	54	2643	6.35789	4.17463e-51	7.7781e-49	["Bbx","Bcl6","Cbfb","Dmrt2","Egr2","Foxc1","Foxf2","Foxg1","Foxi1","Foxj2","Foxj3","Foxk1","Foxo1","Foxo4","Foxp3","Gata3","Hnf4a","Irf1","Irf2","Irf3","Irf4","Irf5","Irf7","Irf8","Irf9","Klf4","Lhx3","Mecom","Nhlh1","Nr1h3","Nr1h4","Nr1i2","Nr1i3","Nr2f2","Pbx1","Pou2f1","Pou5f1","Prdm1","Rara","Rreb1","Rxra","Sox30","Srebf1","Stat5a","Stat5b","Tbx15","Tbx5","Trp53","Zbtb3","Zbtb41","Zeb1","Zfp…
GO:0019438	5	aromatic compound biosynthetic process	54	2650	6.37473	4.82256e-51	7.7781e-49	["Bbx","Bcl6","Cbfb","Dmrt2","Egr2","Foxc1","Foxf2","Foxg1","Foxi1","Foxj2","Foxj3","Foxk1","Foxo1","Foxo4","Foxp3","Gata3","Hnf4a","Irf1","Irf2","Irf3","Irf4","Irf5","Irf7","Irf8","Irf9","Klf4","Lhx3","Mecom","Nhlh1","Nr1h3","Nr1h4","Nr1i2","Nr1i3","Nr2f2","Pbx1","Pou2f1","Pou5f1","Prdm1","Rara","Rreb1","Rxra","Sox30","Srebf1","Stat5a","Stat5b","Tbx15","Tbx5","Trp53","Zbtb3","Zbtb41","Zeb1","Zfp…
GO:0044271	5	cellular nitrogen compound biosynthetic process	54	2727	6.55996	2.2999e-50	3.24573e-48	["Bbx","Bcl6","Cbfb","Dmrt2","Egr2","Foxc1","Foxf2","Foxg1","Foxi1","Foxj2","Foxj3","Foxk1","Foxo1","Foxo4","Foxp3","Gata3","Hnf4a","Irf1","Irf2","Irf3","Irf4","Irf5","Irf7","Irf8","Irf9","Klf4","Lhx3","Mecom","Nhlh1","Nr1h3","Nr1h4","Nr1i2","Nr1i3","Nr2f2","Pbx1","Pou2f1","Pou5f1","Prdm1","Rara","Rreb1","Rxra","Sox30","Srebf1","Stat5a","Stat5b","Tbx15","Tbx5","Trp53","Zbtb3","Zbtb41","Zeb1","Zfp…
GO:0034645	5	cellular macromolecule biosynthetic process	54	2748	6.61048	3.49446e-50	4.07427e-48	["Bbx","Bcl6","Cbfb","Dmrt2","Egr2","Foxc1","Foxf2","Foxg1","Foxi1","Foxj2","Foxj3","Foxk1","Foxo1","Foxo4","Foxp3","Gata3","Hnf4a","Irf1","Irf2","Irf3","Irf4","Irf5","Irf7","Irf8","Irf9","Klf4","Lhx3","Mecom","Nhlh1","Nr1h3","Nr1h4","Nr1i2","Nr1i3","Nr2f2","Pbx1","Pou2f1","Pou5f1","Prdm1","Rara","Rreb1","Rxra","Sox30","Srebf1","Stat5a","Stat5b","Tbx15","Tbx5","Trp53","Zbtb3","Zbtb41","Zeb1","Zfp…
GO:0006357	8	regulation of transcription from RNA polymerase II promoter	50	1822	4.38293	3.60874e-50	4.07427e-48	["Bcl6","Cbfb","Dmrt2","Egr2","Foxc1","Foxf2","Foxg1","Foxi1","Foxj2","Foxj3","Foxk1","Foxo1","Foxo4","Foxp3","Gata3","Hnf4a","Irf1","Irf2","Irf3","Irf4","Irf5","Irf7","Irf8","Klf4","Lhx3","Mecom","Nhlh1","Nr1h3","Nr1h4","Nr1i2","Nr1i3","Nr2f2","Pbx1","Pou2f1","Pou5f1","Prdm1","Rara","Rreb1","Rxra","Sox30","Srebf1","Stat5a","Stat5b","Tbx15","Tbx5","Trp53","Zbtb3","Zeb1","Zfp90","Zic1"]
GO:1901362	5	organic cyclic compound biosynthetic process	54	2778	6.68264	6.31672e-50	6.48325e-48	["Bbx","Bcl6","Cbfb","Dmrt2","Egr2","Foxc1","Foxf2","Foxg1","Foxi1","Foxj2","Foxj3","Foxk1","Foxo1","Foxo4","Foxp3","Gata3","Hnf4a","Irf1","Irf2","Irf3","Irf4","Irf5","Irf7","Irf8","Irf9","Klf4","Lhx3","Mecom","Nhlh1","Nr1h3","Nr1h4","Nr1i2","Nr1i3","Nr2f2","Pbx1","Pou2f1","Pou5f1","Prdm1","Rara","Rreb1","Rxra","Sox30","Srebf1","Stat5a","Stat5b","Tbx15","Tbx5","Trp53","Zbtb3","Zbtb41","Zeb1","Zfp…
GO:0009059	5	macromolecule biosynthetic process	54	2917	7.01702	9.04302e-49	8.50797e-47	["Bbx","Bcl6","Cbfb","Dmrt2","Egr2","Foxc1","Foxf2","Foxg1","Foxi1","Foxj2","Foxj3","Foxk1","Foxo1","Foxo4","Foxp3","Gata3","Hnf4a","Irf1","Irf2","Irf3","Irf4","Irf5","Irf7","Irf8","Irf9","Klf4","Lhx3","Mecom","Nhlh1","Nr1h3","Nr1h4","Nr1i2","Nr1i3","Nr2f2","Pbx1","Pou2f1","Pou5f1","Prdm1","Rara","Rreb1","Rxra","Sox30","Srebf1","Stat5a","Stat5b","Tbx15","Tbx5","Trp53","Zbtb3","Zbtb41","Zeb1","Zfp…
GO:0016070	5	RNA metabolic process	54	2979	7.16616	2.84474e-48	2.47054e-46	["Bbx","Bcl6","Cbfb","Dmrt2","Egr2","Foxc1","Foxf2","Foxg1","Foxi1","Foxj2","Foxj3","Foxk1","Foxo1","Foxo4","Foxp3","Gata3","Hnf4a","Irf1","Irf2","Irf3","Irf4","Irf5","Irf7","Irf8","Irf9","Klf4","Lhx3","Mecom","Nhlh1","Nr1h3","Nr1h4","Nr1i2","Nr1i3","Nr2f2","Pbx1","Pou2f1","Pou5f1","Prdm1","Rara","Rreb1","Rxra","Sox30","Srebf1","Stat5a","Stat5b","Tbx15","Tbx5","Trp53","Zbtb3","Zbtb41","Zeb1","Zfp…
GO:0006355	7	regulation of transcription, DNA-templated	54	3173	7.63284	8.84146e-47	7.13e-45	["Bbx","Bcl6","Cbfb","Dmrt2","Egr2","Foxc1","Foxf2","Foxg1","Foxi1","Foxj2","Foxj3","Foxk1","Foxo1","Foxo4","Foxp3","Gata3","Hnf4a","Irf1","Irf2","Irf3","Irf4","Irf5","Irf7","Irf8","Irf9","Klf4","Lhx3","Mecom","Nhlh1","Nr1h3","Nr1h4","Nr1i2","Nr1i3","Nr2f2","Pbx1","Pou2f1","Pou5f1","Prdm1","Rara","Rreb1","Rxra","Sox30","Srebf1","Stat5a","Stat5b","Tbx15","Tbx5","Trp53","Zbtb3","Zbtb41","Zeb1","Zfp…
GO:1903506	8	regulation of nucleic acid-templated transcription	54	3195	7.68576	1.28804e-46	9.69467e-45	["Bbx","Bcl6","Cbfb","Dmrt2","Egr2","Foxc1","Foxf2","Foxg1","Foxi1","Foxj2","Foxj3","Foxk1","Foxo1","Foxo4","Foxp3","Gata3","Hnf4a","Irf1","Irf2","Irf3","Irf4","Irf5","Irf7","Irf8","Irf9","Klf4","Lhx3","Mecom","Nhlh1","Nr1h3","Nr1h4","Nr1i2","Nr1i3","Nr2f2","Pbx1","Pou2f1","Pou5f1","Prdm1","Rara","Rreb1","Rxra","Sox30","Srebf1","Stat5a","Stat5b","Tbx15","Tbx5","Trp53","Zbtb3","Zbtb41","Zeb1","Zfp…
GO:2001141	7	regulation of RNA biosynthetic process	54	3215	7.73387	1.80926e-46	1.27666e-44	["Bbx","Bcl6","Cbfb","Dmrt2","Egr2","Foxc1","Foxf2","Foxg1","Foxi1","Foxj2","Foxj3","Foxk1","Foxo1","Foxo4","Foxp3","Gata3","Hnf4a","Irf1","Irf2","Irf3","Irf4","Irf5","Irf7","Irf8","Irf9","Klf4","Lhx3","Mecom","Nhlh1","Nr1h3","Nr1h4","Nr1i2","Nr1i3","Nr2f2","Pbx1","Pou2f1","Pou5f1","Prdm1","Rara","Rreb1","Rxra","Sox30","Srebf1","Stat5a","Stat5b","Tbx15","Tbx5","Trp53","Zbtb3","Zbtb41","Zeb1","Zfp…
GO:0051252	6	regulation of RNA metabolic process	54	3317	7.97924	9.90816e-46	6.58019e-44	["Bbx","Bcl6","Cbfb","Dmrt2","Egr2","Foxc1","Foxf2","Foxg1","Foxi1","Foxj2","Foxj3","Foxk1","Foxo1","Foxo4","Foxp3","Gata3","Hnf4a","Irf1","Irf2","Irf3","Irf4","Irf5","Irf7","Irf8","Irf9","Klf4","Lhx3","Mecom","Nhlh1","Nr1h3","Nr1h4","Nr1i2","Nr1i3","Nr2f2","Pbx1","Pou2f1","Pou5f1","Prdm1","Rara","Rreb1","Rxra","Sox30","Srebf1","Stat5a","Stat5b","Tbx15","Tbx5","Trp53","Zbtb3","Zbtb41","Zeb1","Zfp…
GO:0090304	5	nucleic acid metabolic process	54	3462	8.32805	1.01702e-44	6.37898e-43	["Bbx","Bcl6","Cbfb","Dmrt2","Egr2","Foxc1","Foxf2","Foxg1","Foxi1","Foxj2","Foxj3","Foxk1","Foxo1","Foxo4","Foxp3","Gata3","Hnf4a","Irf1","Irf2","Irf3","Irf4","Irf5","Irf7","Irf8","Irf9","Klf4","Lhx3","Mecom","Nhlh1","Nr1h3","Nr1h4","Nr1i2","Nr1i3","Nr2f2","Pbx1","Pou2f1","Pou5f1","Prdm1","Rara","Rreb1","Rxra","Sox30","Srebf1","Stat5a","Stat5b","Tbx15","Tbx5","Trp53","Zbtb3","Zbtb41","Zeb1","Zfp…
GO:2000112	7	regulation of cellular macromolecule biosynthetic process	54	3507	8.4363	2.05365e-44	1.2203e-42	["Bbx","Bcl6","Cbfb","Dmrt2","Egr2","Foxc1","Foxf2","Foxg1","Foxi1","Foxj2","Foxj3","Foxk1","Foxo1","Foxo4","Foxp3","Gata3","Hnf4a","Irf1","Irf2","Irf3","Irf4","Irf5","Irf7","Irf8","Irf9","Klf4","Lhx3","Mecom","Nhlh1","Nr1h3","Nr1h4","Nr1i2","Nr1i3","Nr2f2","Pbx1","Pou2f1","Pou5f1","Prdm1","Rara","Rreb1","Rxra","Sox30","Srebf1","Stat5a","Stat5b","Tbx15","Tbx5","Trp53","Zbtb3","Zbtb41","Zeb1","Zfp…
GO:0010556	6	regulation of macromolecule biosynthetic process	54	3626	8.72256	1.26174e-43	7.12255e-42	["Bbx","Bcl6","Cbfb","Dmrt2","Egr2","Foxc1","Foxf2","Foxg1","Foxi1","Foxj2","Foxj3","Foxk1","Foxo1","Foxo4","Foxp3","Gata3","Hnf4a","Irf1","Irf2","Irf3","Irf4","Irf5","Irf7","Irf8","Irf9","Klf4","Lhx3","Mecom","Nhlh1","Nr1h3","Nr1h4","Nr1i2","Nr1i3","Nr2f2","Pbx1","Pou2f1","Pou5f1","Prdm1","Rara","Rreb1","Rxra","Sox30","Srebf1","Stat5a","Stat5b","Tbx15","Tbx5","Trp53","Zbtb3","Zbtb41","Zeb1","Zfp…
GO:0019219	6	regulation of nucleobase-containing compound metabolic process	54	3642	8.76105	1.6032e-43	8.61911e-42	["Bbx","Bcl6","Cbfb","Dmrt2","Egr2","Foxc1","Foxf2","Foxg1","Foxi1","Foxj2","Foxj3","Foxk1","Foxo1","Foxo4","Foxp3","Gata3","Hnf4a","Irf1","Irf2","Irf3","Irf4","Irf5","Irf7","Irf8","Irf9","Klf4","Lhx3","Mecom","Nhlh1","Nr1h3","Nr1h4","Nr1i2","Nr1i3","Nr2f2","Pbx1","Pou2f1","Pou5f1","Prdm1","Rara","Rreb1","Rxra","Sox30","Srebf1","Stat5a","Stat5b","Tbx15","Tbx5","Trp53","Zbtb3","Zbtb41","Zeb1","Zfp…
GO:0051171	5	regulation of nitrogen compound metabolic process	54	3751	9.02325	7.97222e-43	4.0912e-41	["Bbx","Bcl6","Cbfb","Dmrt2","Egr2","Foxc1","Foxf2","Foxg1","Foxi1","Foxj2","Foxj3","Foxk1","Foxo1","Foxo4","Foxp3","Gata3","Hnf4a","Irf1","Irf2","Irf3","Irf4","Irf5","Irf7","Irf8","Irf9","Klf4","Lhx3","Mecom","Nhlh1","Nr1h3","Nr1h4","Nr1i2","Nr1i3","Nr2f2","Pbx1","Pou2f1","Pou5f1","Prdm1","Rara","Rreb1","Rxra","Sox30","Srebf1","Stat5a","Stat5b","Tbx15","Tbx5","Trp53","Zbtb3","Zbtb41","Zeb1","Zfp…
GO:0044249	4	cellular biosynthetic process	54	3791	9.11948	1.41941e-42	6.96744e-41	["Bbx","Bcl6","Cbfb","Dmrt2","Egr2","Foxc1","Foxf2","Foxg1","Foxi1","Foxj2","Foxj3","Foxk1","Foxo1","Foxo4","Foxp3","Gata3","Hnf4a","Irf1","Irf2","Irf3","Irf4","Irf5","Irf7","Irf8","Irf9","Klf4","Lhx3","Mecom","Nhlh1","Nr1h3","Nr1h4","Nr1i2","Nr1i3","Nr2f2","Pbx1","Pou2f1","Pou5f1","Prdm1","Rara","Rreb1","Rxra","Sox30","Srebf1","Stat5a","Stat5b","Tbx15","Tbx5","Trp53","Zbtb3","Zbtb41","Zeb1","Zfp…
GO:0031326	6	regulation of cellular biosynthetic process	54	3838	9.23254	2.77394e-42	1.30491e-40	["Bbx","Bcl6","Cbfb","Dmrt2","Egr2","Foxc1","Foxf2","Foxg1","Foxi1","Foxj2","Foxj3","Foxk1","Foxo1","Foxo4","Foxp3","Gata3","Hnf4a","Irf1","Irf2","Irf3","Irf4","Irf5","Irf7","Irf8","Irf9","Klf4","Lhx3","Mecom","Nhlh1","Nr1h3","Nr1h4","Nr1i2","Nr1i3","Nr2f2","Pbx1","Pou2f1","Pou5f1","Prdm1","Rara","Rreb1","Rxra","Sox30","Srebf1","Stat5a","Stat5b","Tbx15","Tbx5","Trp53","Zbtb3","Zbtb41","Zeb1","Zfp…
GO:0009889	5	regulation of biosynthetic process	54	3890	9.35763	5.76624e-42	2.60403e-40	["Bbx","Bcl6","Cbfb","Dmrt2","Egr2","Foxc1","Foxf2","Foxg1","Foxi1","Foxj2","Foxj3","Foxk1","Foxo1","Foxo4","Foxp3","Gata3","Hnf4a","Irf1","Irf2","Irf3","Irf4","Irf5","Irf7","Irf8","Irf9","Klf4","Lhx3","Mecom","Nhlh1","Nr1h3","Nr1h4","Nr1i2","Nr1i3","Nr2f2","Pbx1","Pou2f1","Pou5f1","Prdm1","Rara","Rreb1","Rxra","Sox30","Srebf1","Stat5a","Stat5b","Tbx15","Tbx5","Trp53","Zbtb3","Zbtb41","Zeb1","Zfp…
GO:0006139	4	nucleobase-containing compound metabolic process	54	3924	9.43942	9.25501e-42	4.01881e-40	["Bbx","Bcl6","Cbfb","Dmrt2","Egr2","Foxc1","Foxf2","Foxg1","Foxi1","Foxj2","Foxj3","Foxk1","Foxo1","Foxo4","Foxp3","Gata3","Hnf4a","Irf1","Irf2","Irf3","Irf4","Irf5","Irf7","Irf8","Irf9","Klf4","Lhx3","Mecom","Nhlh1","Nr1h3","Nr1h4","Nr1i2","Nr1i3","Nr2f2","Pbx1","Pou2f1","Pou5f1","Prdm1","Rara","Rreb1","Rxra","Sox30","Srebf1","Stat5a","Stat5b","Tbx15","Tbx5","Trp53","Zbtb3","Zbtb41","Zeb1","Zfp…
GO:1901576	4	organic substance biosynthetic process	54	3936	9.46828	1.09263e-41	4.56881e-40	["Bbx","Bcl6","Cbfb","Dmrt2","Egr2","Foxc1","Foxf2","Foxg1","Foxi1","Foxj2","Foxj3","Foxk1","Foxo1","Foxo4","Foxp3","Gata3","Hnf4a","Irf1","Irf2","Irf3","Irf4","Irf5","Irf7","Irf8","Irf9","Klf4","Lhx3","Mecom","Nhlh1","Nr1h3","Nr1h4","Nr1i2","Nr1i3","Nr2f2","Pbx1","Pou2f1","Pou5f1","Prdm1","Rara","Rreb1","Rxra","Sox30","Srebf1","Stat5a","Stat5b","Tbx15","Tbx5","Trp53","Zbtb3","Zbtb41","Zeb1","Zfp…
GO:0010468	6	regulation of gene expression	54	3959	9.52361	1.49983e-41	6.04752e-40	["Bbx","Bcl6","Cbfb","Dmrt2","Egr2","Foxc1","Foxf2","Foxg1","Foxi1","Foxj2","Foxj3","Foxk1","Foxo1","Foxo4","Foxp3","Gata3","Hnf4a","Irf1","Irf2","Irf3","Irf4","Irf5","Irf7","Irf8","Irf9","Klf4","Lhx3","Mecom","Nhlh1","Nr1h3","Nr1h4","Nr1i2","Nr1i3","Nr2f2","Pbx1","Pou2f1","Pou5f1","Prdm1","Rara","Rreb1","Rxra","Sox30","Srebf1","Stat5a","Stat5b","Tbx15","Tbx5","Trp53","Zbtb3","Zbtb41","Zeb1","Zfp…
GO:0009058	3	biosynthetic process	54	4021	9.67275	3.49065e-41	1.35895e-39	["Bbx","Bcl6","Cbfb","Dmrt2","Egr2","Foxc1","Foxf2","Foxg1","Foxi1","Foxj2","Foxj3","Foxk1","Foxo1","Foxo4","Foxp3","Gata3","Hnf4a","Irf1","Irf2","Irf3","Irf4","Irf5","Irf7","Irf8","Irf9","Klf4","Lhx3","Mecom","Nhlh1","Nr1h3","Nr1h4","Nr1i2","Nr1i3","Nr2f2","Pbx1","Pou2f1","Pou5f1","Prdm1","Rara","Rreb1","Rxra","Sox30","Srebf1","Stat5a","Stat5b","Tbx15","Tbx5","Trp53","Zbtb3","Zbtb41","Zeb1","Zfp…
GO:0046483	4	heterocycle metabolic process	54	4115	9.89888	1.22574e-40	4.61288e-39	["Bbx","Bcl6","Cbfb","Dmrt2","Egr2","Foxc1","Foxf2","Foxg1","Foxi1","Foxj2","Foxj3","Foxk1","Foxo1","Foxo4","Foxp3","Gata3","Hnf4a","Irf1","Irf2","Irf3","Irf4","Irf5","Irf7","Irf8","Irf9","Klf4","Lhx3","Mecom","Nhlh1","Nr1h3","Nr1h4","Nr1i2","Nr1i3","Nr2f2","Pbx1","Pou2f1","Pou5f1","Prdm1","Rara","Rreb1","Rxra","Sox30","Srebf1","Stat5a","Stat5b","Tbx15","Tbx5","Trp53","Zbtb3","Zbtb41","Zeb1","Zfp…
GO:0006725	4	cellular aromatic compound metabolic process	54	4145	9.97104	1.8191e-40	6.62503e-39	["Bbx","Bcl6","Cbfb","Dmrt2","Egr2","Foxc1","Foxf2","Foxg1","Foxi1","Foxj2","Foxj3","Foxk1","Foxo1","Foxo4","Foxp3","Gata3","Hnf4a","Irf1","Irf2","Irf3","Irf4","Irf5","Irf7","Irf8","Irf9","Klf4","Lhx3","Mecom","Nhlh1","Nr1h3","Nr1h4","Nr1i2","Nr1i3","Nr2f2","Pbx1","Pou2f1","Pou5f1","Prdm1","Rara","Rreb1","Rxra","Sox30","Srebf1","Stat5a","Stat5b","Tbx15","Tbx5","Trp53","Zbtb3","Zbtb41","Zeb1","Zfp…
GO:0045893	8	positive regulation of transcription, DNA-templated	42	1469	3.53377	1.68158e-39	5.75303e-38	["Cbfb","Dmrt2","Egr2","Foxc1","Foxf2","Foxi1","Foxj2","Foxk1","Foxo1","Foxo4","Foxp3","Gata3","Hnf4a","Irf1","Irf2","Irf4","Irf5","Irf7","Irf8","Klf4","Lhx3","Mecom","Nhlh1","Nr1h3","Nr1h4","Nr1i2","Nr1i3","Nr2f2","Pbx1","Pou2f1","Pou5f1","Rara","Rreb1","Rxra","Srebf1","Stat5a","Stat5b","Tbx5","Trp53","Zeb1","Zfp90","Zic1"]
GO:1903508	9	positive regulation of nucleic acid-templated transcription	42	1469	3.53377	1.68158e-39	5.75303e-38	["Cbfb","Dmrt2","Egr2","Foxc1","Foxf2","Foxi1","Foxj2","Foxk1","Foxo1","Foxo4","Foxp3","Gata3","Hnf4a","Irf1","Irf2","Irf4","Irf5","Irf7","Irf8","Klf4","Lhx3","Mecom","Nhlh1","Nr1h3","Nr1h4","Nr1i2","Nr1i3","Nr2f2","Pbx1","Pou2f1","Pou5f1","Rara","Rreb1","Rxra","Srebf1","Stat5a","Stat5b","Tbx5","Trp53","Zeb1","Zfp90","Zic1"]
GO:1901360	4	organic cyclic compound metabolic process	54	4368	10.5075	3.13698e-39	1.04166e-37	["Bbx","Bcl6","Cbfb","Dmrt2","Egr2","Foxc1","Foxf2","Foxg1","Foxi1","Foxj2","Foxj3","Foxk1","Foxo1","Foxo4","Foxp3","Gata3","Hnf4a","Irf1","Irf2","Irf3","Irf4","Irf5","Irf7","Irf8","Irf9","Klf4","Lhx3","Mecom","Nhlh1","Nr1h3","Nr1h4","Nr1i2","Nr1i3","Nr2f2","Pbx1","Pou2f1","Pou5f1","Prdm1","Rara","Rreb1","Rxra","Sox30","Srebf1","Stat5a","Stat5b","Tbx15","Tbx5","Trp53","Zbtb3","Zbtb41","Zeb1","Zfp…
GO:1902680	8	positive regulation of RNA biosynthetic process	42	1494	3.59391	3.40258e-39	1.09757e-37	["Cbfb","Dmrt2","Egr2","Foxc1","Foxf2","Foxi1","Foxj2","Foxk1","Foxo1","Foxo4","Foxp3","Gata3","Hnf4a","Irf1","Irf2","Irf4","Irf5","Irf7","Irf8","Klf4","Lhx3","Mecom","Nhlh1","Nr1h3","Nr1h4","Nr1i2","Nr1i3","Nr2f2","Pbx1","Pou2f1","Pou5f1","Rara","Rreb1","Rxra","Srebf1","Stat5a","Stat5b","Tbx5","Trp53","Zeb1","Zfp90","Zic1"]
GO:0034641	4	cellular nitrogen compound metabolic process	54	4437	10.6735	7.35038e-39	2.30516e-37	["Bbx","Bcl6","Cbfb","Dmrt2","Egr2","Foxc1","Foxf2","Foxg1","Foxi1","Foxj2","Foxj3","Foxk1","Foxo1","Foxo4","Foxp3","Gata3","Hnf4a","Irf1","Irf2","Irf3","Irf4","Irf5","Irf7","Irf8","Irf9","Klf4","Lhx3","Mecom","Nhlh1","Nr1h3","Nr1h4","Nr1i2","Nr1i3","Nr2f2","Pbx1","Pou2f1","Pou5f1","Prdm1","Rara","Rreb1","Rxra","Sox30","Srebf1","Stat5a","Stat5b","Tbx15","Tbx5","Trp53","Zbtb3","Zbtb41","Zeb1","Zfp…
GO:0051254	7	positive regulation of RNA metabolic process	42	1532	3.68532	9.70627e-39	2.96172e-37	["Cbfb","Dmrt2","Egr2","Foxc1","Foxf2","Foxi1","Foxj2","Foxk1","Foxo1","Foxo4","Foxp3","Gata3","Hnf4a","Irf1","Irf2","Irf4","Irf5","Irf7","Irf8","Klf4","Lhx3","Mecom","Nhlh1","Nr1h3","Nr1h4","Nr1i2","Nr1i3","Nr2f2","Pbx1","Pou2f1","Pou5f1","Rara","Rreb1","Rxra","Srebf1","Stat5a","Stat5b","Tbx5","Trp53","Zeb1","Zfp90","Zic1"]
GO:0010628	7	positive regulation of gene expression	43	1757	4.22657	6.71125e-38	1.99395e-36	["Cbfb","Dmrt2","Egr2","Foxc1","Foxf2","Foxi1","Foxj2","Foxk1","Foxo1","Foxo4","Foxp3","Gata3","Hnf4a","Irf1","Irf2","Irf4","Irf5","Irf7","Irf8","Klf4","Lhx3","Mecom","Nhlh1","Nr1h3","Nr1h4","Nr1i2","Nr1i3","Nr2f2","Pbx1","Pou2f1","Pou5f1","Prdm1","Rara","Rreb1","Rxra","Srebf1","Stat5a","Stat5b","Tbx5","Trp53","Zeb1","Zfp90","Zic1"]
GO:0010557	7	positive regulation of macromolecule biosynthetic process	42	1674	4.02691	3.8938e-37	1.12721e-35	["Cbfb","Dmrt2","Egr2","Foxc1","Foxf2","Foxi1","Foxj2","Foxk1","Foxo1","Foxo4","Foxp3","Gata3","Hnf4a","Irf1","Irf2","Irf4","Irf5","Irf7","Irf8","Klf4","Lhx3","Mecom","Nhlh1","Nr1h3","Nr1h4","Nr1i2","Nr1i3","Nr2f2","Pbx1","Pou2f1","Pou5f1","Rara","Rreb1","Rxra","Srebf1","Stat5a","Stat5b","Tbx5","Trp53","Zeb1","Zfp90","Zic1"]
GO:0006807	3	nitrogen compound metabolic process	54	4818	11.59	6.44838e-37	1.82005e-35	["Bbx","Bcl6","Cbfb","Dmrt2","Egr2","Foxc1","Foxf2","Foxg1","Foxi1","Foxj2","Foxj3","Foxk1","Foxo1","Foxo4","Foxp3","Gata3","Hnf4a","Irf1","Irf2","Irf3","Irf4","Irf5","Irf7","Irf8","Irf9","Klf4","Lhx3","Mecom","Nhlh1","Nr1h3","Nr1h4","Nr1i2","Nr1i3","Nr2f2","Pbx1","Pou2f1","Pou5f1","Prdm1","Rara","Rreb1","Rxra","Sox30","Srebf1","Stat5a","Stat5b","Tbx15","Tbx5","Trp53","Zbtb3","Zbtb41","Zeb1","Zfp…
GO:0045944	9	positive regulation of transcription from RNA polymerase II promoter	37	1054	2.53546	8.44524e-37	2.32553e-35	["Cbfb","Dmrt2","Egr2","Foxc1","Foxf2","Foxi1","Foxj2","Foxo1","Foxp3","Gata3","Hnf4a","Irf1","Irf2","Irf4","Irf5","Irf7","Irf8","Klf4","Lhx3","Mecom","Nhlh1","Nr1h3","Nr1h4","Nr1i2","Nr1i3","Pbx1","Pou2f1","Pou5f1","Rara","Rxra","Srebf1","Stat5a","Stat5b","Tbx5","Trp53","Zeb1","Zic1"]
GO:0045935	7	positive regulation of nucleobase-containing compound metabolic process	42	1744	4.1953	2.13583e-36	5.7413e-35	["Cbfb","Dmrt2","Egr2","Foxc1","Foxf2","Foxi1","Foxj2","Foxk1","Foxo1","Foxo4","Foxp3","Gata3","Hnf4a","Irf1","Irf2","Irf4","Irf5","Irf7","Irf8","Klf4","Lhx3","Mecom","Nhlh1","Nr1h3","Nr1h4","Nr1i2","Nr1i3","Nr2f2","Pbx1","Pou2f1","Pou5f1","Rara","Rreb1","Rxra","Srebf1","Stat5a","Stat5b","Tbx5","Trp53","Zeb1","Zfp90","Zic1"]
GO:0051173	6	positive regulation of nitrogen compound metabolic process	42	1776	4.27227	4.54241e-36	1.19265e-34	["Cbfb","Dmrt2","Egr2","Foxc1","Foxf2","Foxi1","Foxj2","Foxk1","Foxo1","Foxo4","Foxp3","Gata3","Hnf4a","Irf1","Irf2","Irf4","Irf5","Irf7","Irf8","Klf4","Lhx3","Mecom","Nhlh1","Nr1h3","Nr1h4","Nr1i2","Nr1i3","Nr2f2","Pbx1","Pou2f1","Pou5f1","Rara","Rreb1","Rxra","Srebf1","Stat5a","Stat5b","Tbx5","Trp53","Zeb1","Zfp90","Zic1"]
GO:0031328	7	positive regulation of cellular biosynthetic process	42	1824	4.38774	1.37261e-35	3.52198e-34	["Cbfb","Dmrt2","Egr2","Foxc1","Foxf2","Foxi1","Foxj2","Foxk1","Foxo1","Foxo4","Foxp3","Gata3","Hnf4a","Irf1","Irf2","Irf4","Irf5","Irf7","Irf8","Klf4","Lhx3","Mecom","Nhlh1","Nr1h3","Nr1h4","Nr1i2","Nr1i3","Nr2f2","Pbx1","Pou2f1","Pou5f1","Rara","Rreb1","Rxra","Srebf1","Stat5a","Stat5b","Tbx5","Trp53","Zeb1","Zfp90","Zic1"]
GO:0009891	6	positive regulation of biosynthetic process	42	1859	4.47194	3.01669e-35	7.56853e-34	["Cbfb","Dmrt2","Egr2","Foxc1","Foxf2","Foxi1","Foxj2","Foxk1","Foxo1","Foxo4","Foxp3","Gata3","Hnf4a","Irf1","Irf2","Irf4","Irf5","Irf7","Irf8","Klf4","Lhx3","Mecom","Nhlh1","Nr1h3","Nr1h4","Nr1i2","Nr1i3","Nr2f2","Pbx1","Pou2f1","Pou5f1","Rara","Rreb1","Rxra","Srebf1","Stat5a","Stat5b","Tbx5","Trp53","Zeb1","Zfp90","Zic1"]
GO:0080090	5	regulation of primary metabolic process	54	5345	12.8577	1.80563e-34	4.43164e-33	["Bbx","Bcl6","Cbfb","Dmrt2","Egr2","Foxc1","Foxf2","Foxg1","Foxi1","Foxj2","Foxj3","Foxk1","Foxo1","Foxo4","Foxp3","Gata3","Hnf4a","Irf1","Irf2","Irf3","Irf4","Irf5","Irf7","Irf8","Irf9","Klf4","Lhx3","Mecom","Nhlh1","Nr1h3","Nr1h4","Nr1i2","Nr1i3","Nr2f2","Pbx1","Pou2f1","Pou5f1","Prdm1","Rara","Rreb1","Rxra","Sox30","Srebf1","Stat5a","Stat5b","Tbx15","Tbx5","Trp53","Zbtb3","Zbtb41","Zeb1","Zfp…
GO:0060255	5	regulation of macromolecule metabolic process	54	5423	13.0453	3.96345e-34	9.52072e-33	["Bbx","Bcl6","Cbfb","Dmrt2","Egr2","Foxc1","Foxf2","Foxg1","Foxi1","Foxj2","Foxj3","Foxk1","Foxo1","Foxo4","Foxp3","Gata3","Hnf4a","Irf1","Irf2","Irf3","Irf4","Irf5","Irf7","Irf8","Irf9","Klf4","Lhx3","Mecom","Nhlh1","Nr1h3","Nr1h4","Nr1i2","Nr1i3","Nr2f2","Pbx1","Pou2f1","Pou5f1","Prdm1","Rara","Rreb1","Rxra","Sox30","Srebf1","Stat5a","Stat5b","Tbx15","Tbx5","Trp53","Zbtb3","Zbtb41","Zeb1","Zfp…
GO:0031323	5	regulation of cellular metabolic process	54	5591	13.4495	2.07507e-33	4.88075e-32	["Bbx","Bcl6","Cbfb","Dmrt2","Egr2","Foxc1","Foxf2","Foxg1","Foxi1","Foxj2","Foxj3","Foxk1","Foxo1","Foxo4","Foxp3","Gata3","Hnf4a","Irf1","Irf2","Irf3","Irf4","Irf5","Irf7","Irf8","Irf9","Klf4","Lhx3","Mecom","Nhlh1","Nr1h3","Nr1h4","Nr1i2","Nr1i3","Nr2f2","Pbx1","Pou2f1","Pou5f1","Prdm1","Rara","Rreb1","Rxra","Sox30","Srebf1","Stat5a","Stat5b","Tbx15","Tbx5","Trp53","Zbtb3","Zbtb41","Zeb1","Zfp…
GO:0044260	4	cellular macromolecule metabolic process	54	6092	14.6547	2.18189e-31	5.02726e-30	["Bbx","Bcl6","Cbfb","Dmrt2","Egr2","Foxc1","Foxf2","Foxg1","Foxi1","Foxj2","Foxj3","Foxk1","Foxo1","Foxo4","Foxp3","Gata3","Hnf4a","Irf1","Irf2","Irf3","Irf4","Irf5","Irf7","Irf8","Irf9","Klf4","Lhx3","Mecom","Nhlh1","Nr1h3","Nr1h4","Nr1i2","Nr1i3","Nr2f2","Pbx1","Pou2f1","Pou5f1","Prdm1","Rara","Rreb1","Rxra","Sox30","Srebf1","Stat5a","Stat5b","Tbx15","Tbx5","Trp53","Zbtb3","Zbtb41","Zeb1","Zfp…
GO:0010604	6	positive regulation of macromolecule metabolic process	44	2782	6.69227	6.25313e-31	1.41196e-29	["Bcl6","Cbfb","Dmrt2","Egr2","Foxc1","Foxf2","Foxi1","Foxj2","Foxk1","Foxo1","Foxo4","Foxp3","Gata3","Hnf4a","Irf1","Irf2","Irf4","Irf5","Irf7","Irf8","Klf4","Lhx3","Mecom","Nhlh1","Nr1h3","Nr1h4","Nr1i2","Nr1i3","Nr2f2","Pbx1","Pou2f1","Pou5f1","Prdm1","Rara","Rreb1","Rxra","Srebf1","Stat5a","Stat5b","Tbx5","Trp53","Zeb1","Zfp90","Zic1"]
GO:0019222	4	regulation of metabolic process	54	6481	15.5904	6.26075e-30	1.38596e-28	["Bbx","Bcl6","Cbfb","Dmrt2","Egr2","Foxc1","Foxf2","Foxg1","Foxi1","Foxj2","Foxj3","Foxk1","Foxo1","Foxo4","Foxp3","Gata3","Hnf4a","Irf1","Irf2","Irf3","Irf4","Irf5","Irf7","Irf8","Irf9","Klf4","Lhx3","Mecom","Nhlh1","Nr1h3","Nr1h4","Nr1i2","Nr1i3","Nr2f2","Pbx1","Pou2f1","Pou5f1","Prdm1","Rara","Rreb1","Rxra","Sox30","Srebf1","Stat5a","Stat5b","Tbx15","Tbx5","Trp53","Zbtb3","Zbtb41","Zeb1","Zfp…
GO:0045892	8	negative regulation of transcription, DNA-templated	33	1130	2.71828	1.73977e-29	3.77731e-28	["Bcl6","Foxf2","Foxg1","Foxk1","Foxo1","Foxp3","Gata3","Hnf4a","Irf1","Irf2","Irf3","Irf7","Irf8","Klf4","Mecom","Nr1h3","Nr1h4","Nr1i2","Nr1i3","Nr2f2","Pbx1","Pou2f1","Pou5f1","Prdm1","Rara","Rreb1","Rxra","Srebf1","Tbx15","Trp53","Zbtb3","Zeb1","Zfp90"]
GO:1903507	9	negative regulation of nucleic acid-templated transcription	33	1159	2.78804	3.95191e-29	8.41831e-28	["Bcl6","Foxf2","Foxg1","Foxk1","Foxo1","Foxp3","Gata3","Hnf4a","Irf1","Irf2","Irf3","Irf7","Irf8","Klf4","Mecom","Nr1h3","Nr1h4","Nr1i2","Nr1i3","Nr2f2","Pbx1","Pou2f1","Pou5f1","Prdm1","Rara","Rreb1","Rxra","Srebf1","Tbx15","Trp53","Zbtb3","Zeb1","Zfp90"]
GO:1902679	8	negative regulation of RNA biosynthetic process	33	1174	2.82413	5.99032e-29	1.25242e-27	["Bcl6","Foxf2","Foxg1","Foxk1","Foxo1","Foxp3","Gata3","Hnf4a","Irf1","Irf2","Irf3","Irf7","Irf8","Klf4","Mecom","Nr1h3","Nr1h4","Nr1i2","Nr1i3","Nr2f2","Pbx1","Pou2f1","Pou5f1","Prdm1","Rara","Rreb1","Rxra","Srebf1","Tbx15","Trp53","Zbtb3","Zeb1","Zfp90"]
GO:0043170	4	macromolecule metabolic process	54	6877	16.543	1.55975e-28	3.20175e-27	["Bbx","Bcl6","Cbfb","Dmrt2","Egr2","Foxc1","Foxf2","Foxg1","Foxi1","Foxj2","Foxj3","Foxk1","Foxo1","Foxo4","Foxp3","Gata3","Hnf4a","Irf1","Irf2","Irf3","Irf4","Irf5","Irf7","Irf8","Irf9","Klf4","Lhx3","Mecom","Nhlh1","Nr1h3","Nr1h4","Nr1i2","Nr1i3","Nr2f2","Pbx1","Pou2f1","Pou5f1","Prdm1","Rara","Rreb1","Rxra","Sox30","Srebf1","Stat5a","Stat5b","Tbx15","Tbx5","Trp53","Zbtb3","Zbtb41","Zeb1","Zfp…
GO:0051253	7	negative regulation of RNA metabolic process	33	1217	2.92757	1.91491e-28	3.8606e-27	["Bcl6","Foxf2","Foxg1","Foxk1","Foxo1","Foxp3","Gata3","Hnf4a","Irf1","Irf2","Irf3","Irf7","Irf8","Klf4","Mecom","Nr1h3","Nr1h4","Nr1i2","Nr1i3","Nr2f2","Pbx1","Pou2f1","Pou5f1","Prdm1","Rara","Rreb1","Rxra","Srebf1","Tbx15","Trp53","Zbtb3","Zeb1","Zfp90"]
GO:0031325	6	positive regulation of cellular metabolic process	43	2954	7.10602	2.2056e-28	4.36863e-27	["Bcl6","Cbfb","Dmrt2","Egr2","Foxc1","Foxf2","Foxi1","Foxj2","Foxk1","Foxo1","Foxo4","Foxp3","Gata3","Hnf4a","Irf1","Irf2","Irf4","Irf5","Irf7","Irf8","Klf4","Lhx3","Mecom","Nhlh1","Nr1h3","Nr1h4","Nr1i2","Nr1i3","Nr2f2","Pbx1","Pou2f1","Pou5f1","Rara","Rreb1","Rxra","Srebf1","Stat5a","Stat5b","Tbx5","Trp53","Zeb1","Zfp90","Zic1"]
GO:2000113	8	negative regulation of cellular macromolecule biosynthetic process	33	1283	3.08633	1.05052e-27	2.0449e-26	["Bcl6","Foxf2","Foxg1","Foxk1","Foxo1","Foxp3","Gata3","Hnf4a","Irf1","Irf2","Irf3","Irf7","Irf8","Klf4","Mecom","Nr1h3","Nr1h4","Nr1i2","Nr1i3","Nr2f2","Pbx1","Pou2f1","Pou5f1","Prdm1","Rara","Rreb1","Rxra","Srebf1","Tbx15","Trp53","Zbtb3","Zeb1","Zfp90"]
GO:0045934	7	negative regulation of nucleobase-containing compound metabolic process	33	1341	3.22586	4.35216e-27	8.32811e-26	["Bcl6","Foxf2","Foxg1","Foxk1","Foxo1","Foxp3","Gata3","Hnf4a","Irf1","Irf2","Irf3","Irf7","Irf8","Klf4","Mecom","Nr1h3","Nr1h4","Nr1i2","Nr1i3","Nr2f2","Pbx1","Pou2f1","Pou5f1","Prdm1","Rara","Rreb1","Rxra","Srebf1","Tbx15","Trp53","Zbtb3","Zeb1","Zfp90"]
GO:0010558	7	negative regulation of macromolecule biosynthetic process	33	1357	3.26434	6.36859e-27	1.19836e-25	["Bcl6","Foxf2","Foxg1","Foxk1","Foxo1","Foxp3","Gata3","Hnf4a","Irf1","Irf2","Irf3","Irf7","Irf8","Klf4","Mecom","Nr1h3","Nr1h4","Nr1i2","Nr1i3","Nr2f2","Pbx1","Pou2f1","Pou5f1","Prdm1","Rara","Rreb1","Rxra","Srebf1","Tbx15","Trp53","Zbtb3","Zeb1","Zfp90"]
GO:0051172	6	negative regulation of nitrogen compound metabolic process	33	1366	3.28599	7.87307e-27	1.45716e-25	["Bcl6","Foxf2","Foxg1","Foxk1","Foxo1","Foxp3","Gata3","Hnf4a","Irf1","Irf2","Irf3","Irf7","Irf8","Klf4","Mecom","Nr1h3","Nr1h4","Nr1i2","Nr1i3","Nr2f2","Pbx1","Pou2f1","Pou5f1","Prdm1","Rara","Rreb1","Rxra","Srebf1","Tbx15","Trp53","Zbtb3","Zeb1","Zfp90"]
GO:0031327	7	negative regulation of cellular biosynthetic process	33	1421	3.4183	2.78877e-26	5.07827e-25	["Bcl6","Foxf2","Foxg1","Foxk1","Foxo1","Foxp3","Gata3","Hnf4a","Irf1","Irf2","Irf3","Irf7","Irf8","Klf4","Mecom","Nr1h3","Nr1h4","Nr1i2","Nr1i3","Nr2f2","Pbx1","Pou2f1","Pou5f1","Prdm1","Rara","Rreb1","Rxra","Srebf1","Tbx15","Trp53","Zbtb3","Zeb1","Zfp90"]
GO:0009893	5	positive regulation of metabolic process	44	3604	8.66964	3.94796e-26	7.07499e-25	["Bcl6","Cbfb","Dmrt2","Egr2","Foxc1","Foxf2","Foxi1","Foxj2","Foxk1","Foxo1","Foxo4","Foxp3","Gata3","Hnf4a","Irf1","Irf2","Irf4","Irf5","Irf7","Irf8","Klf4","Lhx3","Mecom","Nhlh1","Nr1h3","Nr1h4","Nr1i2","Nr1i3","Nr2f2","Pbx1","Pou2f1","Pou5f1","Prdm1","Rara","Rreb1","Rxra","Srebf1","Stat5a","Stat5b","Tbx5","Trp53","Zeb1","Zfp90","Zic1"]
GO:0009890	6	negative regulation of biosynthetic process	33	1446	3.47844	4.87184e-26	8.59423e-25	["Bcl6","Foxf2","Foxg1","Foxk1","Foxo1","Foxp3","Gata3","Hnf4a","Irf1","Irf2","Irf3","Irf7","Irf8","Klf4","Mecom","Nr1h3","Nr1h4","Nr1i2","Nr1i3","Nr2f2","Pbx1","Pou2f1","Pou5f1","Prdm1","Rara","Rreb1","Rxra","Srebf1","Tbx15","Trp53","Zbtb3","Zeb1","Zfp90"]
GO:0010629	7	negative regulation of gene expression	33	1522	3.66126	2.49954e-25	4.34151e-24	["Bcl6","Foxf2","Foxg1","Foxk1","Foxo1","Foxp3","Gata3","Hnf4a","Irf1","Irf2","Irf3","Irf7","Irf8","Klf4","Mecom","Nr1h3","Nr1h4","Nr1i2","Nr1i3","Nr2f2","Pbx1","Pou2f1","Pou5f1","Prdm1","Rara","Rreb1","Rxra","Srebf1","Tbx15","Trp53","Zbtb3","Zeb1","Zfp90"]
GO:0044237	3	cellular metabolic process	54	8016	19.283	6.31143e-25	1.07964e-23	["Bbx","Bcl6","Cbfb","Dmrt2","Egr2","Foxc1","Foxf2","Foxg1","Foxi1","Foxj2","Foxj3","Foxk1","Foxo1","Foxo4","Foxp3","Gata3","Hnf4a","Irf1","Irf2","Irf3","Irf4","Irf5","Irf7","Irf8","Irf9","Klf4","Lhx3","Mecom","Nhlh1","Nr1h3","Nr1h4","Nr1i2","Nr1i3","Nr2f2","Pbx1","Pou2f1","Pou5f1","Prdm1","Rara","Rreb1","Rxra","Sox30","Srebf1","Stat5a","Stat5b","Tbx15","Tbx5","Trp53","Zbtb3","Zbtb41","Zeb1","Zfp…
GO:0044238	3	primary metabolic process	54	8175	19.6654	1.82922e-24	3.08237e-23	["Bbx","Bcl6","Cbfb","Dmrt2","Egr2","Foxc1","Foxf2","Foxg1","Foxi1","Foxj2","Foxj3","Foxk1","Foxo1","Foxo4","Foxp3","Gata3","Hnf4a","Irf1","Irf2","Irf3","Irf4","Irf5","Irf7","Irf8","Irf9","Klf4","Lhx3","Mecom","Nhlh1","Nr1h3","Nr1h4","Nr1i2","Nr1i3","Nr2f2","Pbx1","Pou2f1","Pou5f1","Prdm1","Rara","Rreb1","Rxra","Sox30","Srebf1","Stat5a","Stat5b","Tbx15","Tbx5","Trp53","Zbtb3","Zbtb41","Zeb1","Zfp…
GO:0071704	3	organic substance metabolic process	54	8475	20.3871	1.28876e-23	2.13972e-22	["Bbx","Bcl6","Cbfb","Dmrt2","Egr2","Foxc1","Foxf2","Foxg1","Foxi1","Foxj2","Foxj3","Foxk1","Foxo1","Foxo4","Foxp3","Gata3","Hnf4a","Irf1","Irf2","Irf3","Irf4","Irf5","Irf7","Irf8","Irf9","Klf4","Lhx3","Mecom","Nhlh1","Nr1h3","Nr1h4","Nr1i2","Nr1i3","Nr2f2","Pbx1","Pou2f1","Pou5f1","Prdm1","Rara","Rreb1","Rxra","Sox30","Srebf1","Stat5a","Stat5b","Tbx15","Tbx5","Trp53","Zbtb3","Zbtb41","Zeb1","Zfp…
GO:0048522	5	positive regulation of cellular process	46	4765	11.4625	1.50459e-23	2.46187e-22	["Bcl6","Cbfb","Dmrt2","Egr2","Foxc1","Foxf2","Foxg1","Foxi1","Foxj2","Foxk1","Foxo1","Foxo4","Foxp3","Gata3","Hnf4a","Irf1","Irf2","Irf3","Irf4","Irf5","Irf7","Irf8","Klf4","Lhx3","Mecom","Nhlh1","Nr1h3","Nr1h4","Nr1i2","Nr1i3","Nr2f2","Pbx1","Pou2f1","Pou5f1","Prdm1","Rara","Rreb1","Rxra","Srebf1","Stat5a","Stat5b","Tbx5","Trp53","Zeb1","Zfp90","Zic1"]
GO:0030154	5	cell differentiation	34	2197	5.28501	1.71392e-21	2.76431e-20	["Bcl6","Cbfb","Egr2","Foxc1","Foxg1","Foxj2","Foxj3","Foxk1","Foxo1","Foxo4","Foxp3","Gata3","Hnf4a","Irf1","Irf4","Irf8","Klf4","Lhx3","Mecom","Nhlh1","Nr1i3","Nr2f2","Pbx1","Pou5f1","Prdm1","Rara","Rxra","Stat5a","Stat5b","Tbx5","Trp53","Zeb1","Zfp39","Zic1"]
GO:0000122	9	negative regulation of transcription from RNA polymerase II promoter	24	773	1.8595	2.87824e-21	4.5768e-20	["Bcl6","Foxg1","Foxo1","Foxp3","Gata3","Irf2","Irf3","Irf7","Irf8","Klf4","Nr1h3","Nr1h4","Nr2f2","Pou5f1","Prdm1","Rara","Rreb1","Rxra","Srebf1","Tbx15","Trp53","Zbtb3","Zeb1","Zfp90"]
GO:0048518	4	positive regulation of biological process	46	5484	13.1921	7.19971e-21	1.12896e-19	["Bcl6","Cbfb","Dmrt2","Egr2","Foxc1","Foxf2","Foxg1","Foxi1","Foxj2","Foxk1","Foxo1","Foxo4","Foxp3","Gata3","Hnf4a","Irf1","Irf2","Irf3","Irf4","Irf5","Irf7","Irf8","Klf4","Lhx3","Mecom","Nhlh1","Nr1h3","Nr1h4","Nr1i2","Nr1i3","Nr2f2","Pbx1","Pou2f1","Pou5f1","Prdm1","Rara","Rreb1","Rxra","Srebf1","Stat5a","Stat5b","Tbx5","Trp53","Zeb1","Zfp90","Zic1"]
GO:0008152	2	metabolic process	54	9566	23.0116	9.08794e-21	1.40552e-19	["Bbx","Bcl6","Cbfb","Dmrt2","Egr2","Foxc1","Foxf2","Foxg1","Foxi1","Foxj2","Foxj3","Foxk1","Foxo1","Foxo4","Foxp3","Gata3","Hnf4a","Irf1","Irf2","Irf3","Irf4","Irf5","Irf7","Irf8","Irf9","Klf4","Lhx3","Mecom","Nhlh1","Nr1h3","Nr1h4","Nr1i2","Nr1i3","Nr2f2","Pbx1","Pou2f1","Pou5f1","Prdm1","Rara","Rreb1","Rxra","Sox30","Srebf1","Stat5a","Stat5b","Tbx15","Tbx5","Trp53","Zbtb3","Zbtb41","Zeb1","Zfp…
GO:0010605	6	negative regulation of macromolecule metabolic process	33	2308	5.55203	1.20044e-19	1.80706e-18	["Bcl6","Foxf2","Foxg1","Foxk1","Foxo1","Foxp3","Gata3","Hnf4a","Irf1","Irf2","Irf3","Irf7","Irf8","Klf4","Mecom","Nr1h3","Nr1h4","Nr1i2","Nr1i3","Nr2f2","Pbx1","Pou2f1","Pou5f1","Prdm1","Rara","Rreb1","Rxra","Srebf1","Tbx15","Trp53","Zbtb3","Zeb1","Zfp90"]
GO:0031324	6	negative regulation of cellular metabolic process	33	2308	5.55203	1.20044e-19	1.80706e-18	["Bcl6","Foxf2","Foxg1","Foxk1","Foxo1","Foxp3","Gata3","Hnf4a","Irf1","Irf2","Irf3","Irf7","Irf8","Klf4","Mecom","Nr1h3","Nr1h4","Nr1i2","Nr1i3","Nr2f2","Pbx1","Pou2f1","Pou5f1","Prdm1","Rara","Rreb1","Rxra","Srebf1","Tbx15","Trp53","Zbtb3","Zeb1","Zfp90"]
GO:0048523	5	negative regulation of cellular process	41	4294	10.3295	2.34477e-19	3.48322e-18	["Bcl6","Egr2","Foxc1","Foxf2","Foxg1","Foxk1","Foxo1","Foxo4","Foxp3","Gata3","Hnf4a","Irf1","Irf2","Irf3","Irf4","Irf7","Irf8","Klf4","Lhx3","Mecom","Nr1h3","Nr1h4","Nr1i2","Nr1i3","Nr2f2","Pbx1","Pou2f1","Pou5f1","Prdm1","Rara","Rreb1","Rxra","Srebf1","Stat5a","Stat5b","Tbx15","Tbx5","Trp53","Zbtb3","Zeb1","Zfp90"]
GO:0044767	3	single-organism developmental process	43	4956	11.922	3.61122e-19	5.29489e-18	["Bbx","Bcl6","Cbfb","Dmrt2","Egr2","Foxc1","Foxf2","Foxg1","Foxi1","Foxj2","Foxj3","Foxk1","Foxo1","Foxo4","Foxp3","Gata3","Hnf4a","Irf1","Irf4","Irf8","Klf4","Lhx3","Mecom","Nhlh1","Nr1h4","Nr1i3","Nr2f2","Pbx1","Pou2f1","Pou5f1","Prdm1","Rara","Rreb1","Rxra","Srebf1","Stat5a","Stat5b","Tbx15","Tbx5","Trp53","Zeb1","Zfp39","Zic1"]
GO:0009653	3	anatomical structure morphogenesis	28	1514	3.64202	4.32482e-19	6.25991e-18	["Bcl6","Foxc1","Foxf2","Foxg1","Foxi1","Foxj2","Foxj3","Foxk1","Foxo1","Foxo4","Foxp3","Gata3","Hnf4a","Klf4","Lhx3","Mecom","Nr2f2","Pbx1","Pou5f1","Prdm1","Rara","Rxra","Stat5a","Tbx15","Tbx5","Trp53","Zeb1","Zic1"]
GO:0048869	4	cellular developmental process	35	2973	7.15173	2.16145e-18	3.08896e-17	["Bcl6","Cbfb","Egr2","Foxc1","Foxf2","Foxg1","Foxj2","Foxj3","Foxk1","Foxo1","Foxo4","Foxp3","Gata3","Hnf4a","Irf1","Irf4","Irf8","Klf4","Lhx3","Mecom","Nhlh1","Nr1i3","Nr2f2","Pbx1","Pou5f1","Prdm1","Rara","Rxra","Stat5a","Stat5b","Tbx5","Trp53","Zeb1","Zfp39","Zic1"]
GO:0048519	4	negative regulation of biological process	41	4697	11.2989	7.10865e-18	1.00321e-16	["Bcl6","Egr2","Foxc1","Foxf2","Foxg1","Foxk1","Foxo1","Foxo4","Foxp3","Gata3","Hnf4a","Irf1","Irf2","Irf3","Irf4","Irf7","Irf8","Klf4","Lhx3","Mecom","Nr1h3","Nr1h4","Nr1i2","Nr1i3","Nr2f2","Pbx1","Pou2f1","Pou5f1","Prdm1","Rara","Rreb1","Rxra","Srebf1","Stat5a","Stat5b","Tbx15","Tbx5","Trp53","Zbtb3","Zeb1","Zfp90"]
GO:0009892	5	negative regulation of metabolic process	33	2639	6.34827	7.35787e-18	1.02556e-16	["Bcl6","Foxf2","Foxg1","Foxk1","Foxo1","Foxp3","Gata3","Hnf4a","Irf1","Irf2","Irf3","Irf7","Irf8","Klf4","Mecom","Nr1h3","Nr1h4","Nr1i2","Nr1i3","Nr2f2","Pbx1","Pou2f1","Pou5f1","Prdm1","Rara","Rreb1","Rxra","Srebf1","Tbx15","Trp53","Zbtb3","Zeb1","Zfp90"]
GO:0032502	2	developmental process	43	5346	12.8601	7.47604e-18	1.02932e-16	["Bbx","Bcl6","Cbfb","Dmrt2","Egr2","Foxc1","Foxf2","Foxg1","Foxi1","Foxj2","Foxj3","Foxk1","Foxo1","Foxo4","Foxp3","Gata3","Hnf4a","Irf1","Irf4","Irf8","Klf4","Lhx3","Mecom","Nhlh1","Nr1h4","Nr1i3","Nr2f2","Pbx1","Pou2f1","Pou5f1","Prdm1","Rara","Rreb1","Rxra","Srebf1","Stat5a","Stat5b","Tbx15","Tbx5","Trp53","Zeb1","Zfp39","Zic1"]
GO:0050794	4	regulation of cellular process	54	10916	26.2591	1.15483e-17	1.57085e-16	["Bbx","Bcl6","Cbfb","Dmrt2","Egr2","Foxc1","Foxf2","Foxg1","Foxi1","Foxj2","Foxj3","Foxk1","Foxo1","Foxo4","Foxp3","Gata3","Hnf4a","Irf1","Irf2","Irf3","Irf4","Irf5","Irf7","Irf8","Irf9","Klf4","Lhx3","Mecom","Nhlh1","Nr1h3","Nr1h4","Nr1i2","Nr1i3","Nr2f2","Pbx1","Pou2f1","Pou5f1","Prdm1","Rara","Rreb1","Rxra","Sox30","Srebf1","Stat5a","Stat5b","Tbx15","Tbx5","Trp53","Zbtb3","Zbtb41","Zeb1","Zfp…
GO:0050789	3	regulation of biological process	54	11418	27.4667	1.31662e-16	1.7696e-15	["Bbx","Bcl6","Cbfb","Dmrt2","Egr2","Foxc1","Foxf2","Foxg1","Foxi1","Foxj2","Foxj3","Foxk1","Foxo1","Foxo4","Foxp3","Gata3","Hnf4a","Irf1","Irf2","Irf3","Irf4","Irf5","Irf7","Irf8","Irf9","Klf4","Lhx3","Mecom","Nhlh1","Nr1h3","Nr1h4","Nr1i2","Nr1i3","Nr2f2","Pbx1","Pou2f1","Pou5f1","Prdm1","Rara","Rreb1","Rxra","Sox30","Srebf1","Stat5a","Stat5b","Tbx15","Tbx5","Trp53","Zbtb3","Zbtb41","Zeb1","Zfp…
GO:0051239	4	regulation of multicellular organismal process	31	2641	6.35308	9.16597e-16	1.21746e-14	["Bcl6","Dmrt2","Egr2","Foxc1","Foxg1","Foxo1","Foxo4","Foxp3","Gata3","Hnf4a","Irf1","Irf3","Irf4","Irf5","Irf7","Irf8","Klf4","Nr1h3","Nr2f2","Pbx1","Pou5f1","Prdm1","Rara","Rreb1","Rxra","Srebf1","Stat5a","Stat5b","Tbx5","Trp53","Zeb1"]
GO:0065007	2	biological regulation	54	11898	28.6213	1.22291e-15	1.60543e-14	["Bbx","Bcl6","Cbfb","Dmrt2","Egr2","Foxc1","Foxf2","Foxg1","Foxi1","Foxj2","Foxj3","Foxk1","Foxo1","Foxo4","Foxp3","Gata3","Hnf4a","Irf1","Irf2","Irf3","Irf4","Irf5","Irf7","Irf8","Irf9","Klf4","Lhx3","Mecom","Nhlh1","Nr1h3","Nr1h4","Nr1i2","Nr1i3","Nr2f2","Pbx1","Pou2f1","Pou5f1","Prdm1","Rara","Rreb1","Rxra","Sox30","Srebf1","Stat5a","Stat5b","Tbx15","Tbx5","Trp53","Zbtb3","Zbtb41","Zeb1","Zfp…
GO:0045596	6	negative regulation of cell differentiation	19	753	1.81139	4.72996e-15	6.13807e-14	["Bcl6","Foxc1","Foxg1","Foxo1","Foxo4","Foxp3","Gata3","Irf1","Klf4","Mecom","Nr1h3","Pbx1","Pou5f1","Rara","Stat5a","Stat5b","Tbx5","Trp53","Zeb1"]
GO:0048856	3	anatomical structure development	33	3413	8.21017	1.66855e-14	2.14068e-13	["Bbx","Bcl6","Cbfb","Dmrt2","Egr2","Foxc1","Foxf2","Foxg1","Foxi1","Foxk1","Foxo1","Foxo4","Gata3","Hnf4a","Klf4","Lhx3","Mecom","Nhlh1","Nr1h4","Nr2f2","Pbx1","Pou2f1","Pou5f1","Prdm1","Rara","Rxra","Srebf1","Stat5a","Stat5b","Tbx5","Trp53","Zeb1","Zic1"]
GO:0009755	6	hormone-mediated signaling pathway	10	99	0.23815	3.5589e-14	4.5146e-13	["Hnf4a","Nr1h3","Nr1h4","Nr1i2","Nr1i3","Nr2f2","Rara","Rxra","Stat5a","Stat5b"]
GO:0009987	2	cellular process	54	12806	30.8056	6.54403e-14	8.20912e-13	["Bbx","Bcl6","Cbfb","Dmrt2","Egr2","Foxc1","Foxf2","Foxg1","Foxi1","Foxj2","Foxj3","Foxk1","Foxo1","Foxo4","Foxp3","Gata3","Hnf4a","Irf1","Irf2","Irf3","Irf4","Irf5","Irf7","Irf8","Irf9","Klf4","Lhx3","Mecom","Nhlh1","Nr1h3","Nr1h4","Nr1i2","Nr1i3","Nr2f2","Pbx1","Pou2f1","Pou5f1","Prdm1","Rara","Rreb1","Rxra","Sox30","Srebf1","Stat5a","Stat5b","Tbx15","Tbx5","Trp53","Zbtb3","Zbtb41","Zeb1","Zfp…
GO:0051093	5	negative regulation of developmental process	19	959	2.30693	3.58652e-13	4.44965e-12	["Bcl6","Foxc1","Foxg1","Foxo1","Foxo4","Foxp3","Gata3","Irf1","Klf4","Mecom","Nr1h3","Pbx1","Pou5f1","Rara","Stat5a","Stat5b","Tbx5","Trp53","Zeb1"]
GO:0060333	8	interferon-gamma-mediated signaling pathway	8	52	0.125089	4.52411e-13	5.55187e-12	["Irf1","Irf2","Irf3","Irf4","Irf5","Irf7","Irf8","Irf9"]
GO:0048513	4	organ development	23	1617	3.88979	5.58718e-13	6.78272e-12	["Bbx","Cbfb","Egr2","Foxc1","Foxf2","Foxg1","Foxk1","Foxo4","Gata3","Klf4","Lhx3","Pbx1","Pou2f1","Prdm1","Rara","Rxra","Srebf1","Stat5a","Stat5b","Tbx5","Trp53","Zeb1","Zic1"]
GO:0060337	8	type I interferon signaling pathway	8	55	0.132306	7.2798e-13	8.74351e-12	["Irf1","Irf2","Irf3","Irf4","Irf5","Irf7","Irf8","Irf9"]
GO:0043401	7	steroid hormone mediated signaling pathway	8	59	0.141928	1.31618e-12	1.56417e-11	["Hnf4a","Nr1h3","Nr1h4","Nr1i2","Nr1i3","Nr2f2","Rara","Rxra"]
GO:0045595	5	regulation of cell differentiation	23	1691	4.0678	1.41768e-12	1.66725e-11	["Bcl6","Foxc1","Foxg1","Foxo1","Foxo4","Foxp3","Gata3","Irf1","Irf4","Irf7","Klf4","Mecom","Nr1h3","Pbx1","Pou5f1","Prdm1","Rara","Rreb1","Stat5a","Stat5b","Tbx5","Trp53","Zeb1"]
GO:2000026	5	regulation of multicellular organismal development	23	1742	4.19048	2.62301e-12	3.05297e-11	["Bcl6","Dmrt2","Foxc1","Foxg1","Foxo4","Foxp3","Gata3","Hnf4a","Irf1","Irf4","Irf7","Klf4","Pbx1","Pou5f1","Prdm1","Rara","Rreb1","Rxra","Stat5a","Stat5b","Tbx5","Trp53","Zeb1"]
GO:0045619	7	regulation of lymphocyte differentiation	10	154	0.370456	3.17591e-12	3.65878e-11	["Bcl6","Foxp3","Gata3","Irf1","Irf4","Prdm1","Rara","Stat5a","Stat5b","Zeb1"]
GO:0050793	4	regulation of developmental process	26	2374	5.7108	3.64537e-12	4.15719e-11	["Bcl6","Dmrt2","Foxc1","Foxg1","Foxo1","Foxo4","Foxp3","Gata3","Hnf4a","Irf1","Irf4","Irf7","Klf4","Mecom","Nr1h3","Pbx1","Pou5f1","Prdm1","Rara","Rreb1","Rxra","Stat5a","Stat5b","Tbx5","Trp53","Zeb1"]
GO:0045580	8	regulation of T cell differentiation	9	124	0.298289	1.53896e-11	1.73749e-10	["Bcl6","Foxp3","Gata3","Irf1","Irf4","Rara","Stat5a","Stat5b","Zeb1"]
GO:0030522	6	intracellular receptor signaling pathway	10	186	0.447434	2.08728e-11	2.33321e-10	["Hnf4a","Irf3","Irf7","Nr1h3","Nr1h4","Nr1i2","Nr1i3","Nr2f2","Rara","Rxra"]
GO:1902105	6	regulation of leukocyte differentiation	11	258	0.620634	2.31099e-11	2.55795e-10	["Bcl6","Foxp3","Gata3","Irf1","Irf4","Irf7","Prdm1","Rara","Stat5a","Stat5b","Zeb1"]
GO:1903706	5	regulation of hemopoiesis	12	349	0.83954	3.15403e-11	3.45719e-10	["Bcl6","Foxc1","Foxp3","Gata3","Irf1","Irf4","Irf7","Prdm1","Rara","Stat5a","Stat5b","Zeb1"]
GO:0042127	5	regulation of cell proliferation	21	1591	3.82725	3.41848e-11	3.71102e-10	["Bcl6","Foxg1","Foxo1","Foxo4","Foxp3","Gata3","Hnf4a","Irf1","Klf4","Mecom","Nr2f2","Pbx1","Prdm1","Rara","Rreb1","Rxra","Stat5a","Stat5b","Tbx5","Trp53","Zeb1"]
GO:0042035	6	regulation of cytokine biosynthetic process	8	108	0.2598	1.9106e-10	2.05435e-09	["Foxp3","Gata3","Irf1","Irf3","Irf4","Klf4","Stat5a","Stat5b"]
GO:0051241	5	negative regulation of multicellular organismal process	17	1067	2.56673	2.53603e-10	2.70111e-09	["Bcl6","Foxc1","Foxg1","Foxo4","Foxp3","Gata3","Irf1","Irf3","Klf4","Nr1h3","Nr2f2","Pbx1","Rara","Stat5a","Stat5b","Tbx5","Trp53"]
GO:0009605	3	response to external stimulus	20	1592	3.82965	2.85851e-10	3.01613e-09	["Foxo1","Foxp3","Gata3","Irf1","Irf3","Irf4","Irf5","Irf7","Irf8","Irf9","Mecom","Nr1h3","Nr1h4","Rara","Rxra","Srebf1","Stat5a","Stat5b","Trp53","Zeb1"]
GO:0043370	10	regulation of CD4-positive, alpha-beta T cell differentiation	6	40	0.0962224	5.24428e-10	5.43961e-09	["Bcl6","Foxp3","Gata3","Irf1","Irf4","Rara"]
GO:0001817	5	regulation of cytokine production	13	558	1.3423	5.25171e-10	5.43961e-09	["Bcl6","Foxp3","Gata3","Irf1","Irf3","Irf4","Irf5","Irf7","Irf8","Klf4","Rara","Stat5a","Stat5b"]
GO:0008285	6	negative regulation of cell proliferation	14	693	1.66705	6.49425e-10	6.66546e-09	["Bcl6","Foxo4","Foxp3","Gata3","Hnf4a","Irf1","Klf4","Nr2f2","Prdm1","Rara","Rxra","Tbx5","Trp53","Zeb1"]
GO:0051240	5	positive regulation of multicellular organismal process	19	1505	3.62037	8.56658e-10	8.71322e-09	["Bcl6","Dmrt2","Foxc1","Foxg1","Foxp3","Gata3","Irf1","Irf3","Irf4","Irf5","Irf7","Irf8","Prdm1","Rara","Rreb1","Stat5a","Stat5b","Tbx5","Zeb1"]
GO:2000514	9	regulation of CD4-positive, alpha-beta T cell activation	6	44	0.105845	9.57407e-10	9.651e-09	["Bcl6","Foxp3","Gata3","Irf1","Irf4","Rara"]
GO:0001819	6	positive regulation of cytokine production	11	371	0.892463	1.09881e-09	1.09784e-08	["Foxp3","Gata3","Irf1","Irf3","Irf4","Irf5","Irf7","Irf8","Rara","Stat5a","Stat5b"]
GO:0009607	3	response to biotic stimulus	15	872	2.09765	1.28928e-09	1.27684e-08	["Foxp3","Gata3","Irf1","Irf3","Irf4","Irf5","Irf7","Irf8","Irf9","Mecom","Nr1h3","Nr1h4","Rara","Stat5b","Trp53"]
GO:0045621	8	positive regulation of lymphocyte differentiation	7	89	0.214095	1.84374e-09	1.81007e-08	["Foxp3","Gata3","Irf1","Prdm1","Rara","Stat5a","Stat5b"]
GO:0032501	2	multicellular organismal process	32	4894	11.7728	2.7504e-09	2.6769e-08	["Cbfb","Dmrt2","Egr2","Foxc1","Foxg1","Foxk1","Foxo1","Foxo4","Foxp3","Gata3","Hnf4a","Irf1","Irf2","Irf7","Klf4","Lhx3","Mecom","Nhlh1","Nr2f2","Pbx1","Pou5f1","Prdm1","Rara","Rreb1","Rxra","Stat5a","Stat5b","Tbx5","Trp53","Zeb1","Zfp39","Zic1"]
GO:0007389	4	pattern specification process	11	416	1.00071	3.6324e-09	3.50511e-08	["Dmrt2","Egr2","Foxc1","Foxg1","Lhx3","Nr2f2","Pbx1","Tbx5","Trp53","Zeb1","Zic1"]
GO:0046637	9	regulation of alpha-beta T cell differentiation	6	55	0.132306	3.85325e-09	3.68671e-08	["Bcl6","Foxp3","Gata3","Irf1","Irf4","Rara"]
GO:1901700	4	response to oxygen-containing compound	19	1676	4.03172	5.11345e-09	4.85133e-08	["Egr2","Foxo1","Gata3","Hnf4a","Irf1","Irf3","Irf5","Irf8","Klf4","Nr1h3","Nr1h4","Nr2f2","Pou5f1","Rara","Rxra","Srebf1","Stat5a","Stat5b","Zeb1"]
GO:0002694	5	regulation of leukocyte activation	11	442	1.06326	6.81015e-09	6.40721e-08	["Bcl6","Foxp3","Gata3","Irf1","Irf4","Nr1h3","Prdm1","Rara","Stat5a","Stat5b","Zeb1"]
GO:0043207	4	response to external biotic stimulus	14	842	2.02548	7.87546e-09	7.34826e-08	["Foxp3","Gata3","Irf1","Irf3","Irf4","Irf5","Irf7","Irf8","Irf9","Mecom","Nr1h3","Nr1h4","Rara","Stat5b"]
GO:1903708	6	positive regulation of hemopoiesis	8	175	0.420973	8.90617e-09	8.24186e-08	["Foxc1","Foxp3","Gata3","Irf1","Prdm1","Rara","Stat5a","Stat5b"]
GO:0048598	4	embryonic morphogenesis	11	456	1.09694	9.39696e-09	8.62067e-08	["Foxf2","Foxg1","Foxi1","Gata3","Mecom","Pbx1","Tbx15","Tbx5","Trp53","Zeb1","Zic1"]
GO:0022414	2	reproductive process	17	1355	3.25953	9.46823e-09	8.62067e-08	["Bcl6","Dmrt2","Foxc1","Foxf2","Gata3","Hnf4a","Irf1","Lhx3","Nr2f2","Pbx1","Prdm1","Rara","Rxra","Sox30","Stat5a","Stat5b","Zfp39"]
GO:0044707	3	single-multicellular organism process	31	4823	11.602	9.73459e-09	8.79228e-08	["Cbfb","Dmrt2","Egr2","Foxc1","Foxg1","Foxk1","Foxo1","Foxo4","Foxp3","Gata3","Hnf4a","Irf1","Irf2","Irf7","Klf4","Lhx3","Mecom","Nhlh1","Nr2f2","Pbx1","Pou5f1","Prdm1","Rara","Rreb1","Stat5a","Stat5b","Tbx5","Trp53","Zeb1","Zfp39","Zic1"]
GO:0045622	6	regulation of T-helper cell differentiation	5	32	0.0769779	1.27696e-08	1.14419e-07	["Bcl6","Foxp3","Irf1","Irf4","Rara"]
GO:0003006	3	developmental process involved in reproduction	13	730	1.75606	1.32514e-08	1.17802e-07	["Dmrt2","Foxc1","Foxf2","Gata3","Hnf4a","Lhx3","Nr2f2","Pbx1","Prdm1","Rara","Rxra","Stat5a","Stat5b"]
GO:0050865	5	regulation of cell activation	11	476	1.14505	1.46156e-08	1.28914e-07	["Bcl6","Foxp3","Gata3","Irf1","Irf4","Nr1h3","Prdm1","Rara","Stat5a","Stat5b","Zeb1"]
GO:0022407	6	regulation of cell-cell adhesion	10	374	0.899679	1.8226e-08	1.59513e-07	["Bcl6","Foxp3","Gata3","Irf1","Irf4","Klf4","Rara","Stat5a","Stat5b","Zeb1"]
GO:0051094	5	positive regulation of developmental process	16	1241	2.9853	1.98464e-08	1.72359e-07	["Bcl6","Dmrt2","Foxc1","Foxg1","Foxp3","Gata3","Irf1","Mecom","Prdm1","Rara","Rreb1","Stat5a","Stat5b","Tbx5","Trp53","Zeb1"]
GO:0002682	4	regulation of immune system process	17	1428	3.43514	2.06008e-08	1.75485e-07	["Bcl6","Foxc1","Foxo1","Foxo4","Foxp3","Gata3","Irf1","Irf3","Irf4","Irf7","Nr1h3","Prdm1","Rara","Stat5a","Stat5b","Trp53","Zeb1"]
GO:0051249	6	regulation of lymphocyte activation	10	379	0.911707	2.06614e-08	1.75485e-07	["Bcl6","Foxp3","Gata3","Irf1","Irf4","Prdm1","Rara","Stat5a","Stat5b","Zeb1"]
GO:0045597	6	positive regulation of cell differentiation	14	909	2.18665	2.06727e-08	1.75485e-07	["Bcl6","Foxc1","Foxg1","Foxp3","Gata3","Irf1","Mecom","Prdm1","Rara","Rreb1","Stat5a","Stat5b","Tbx5","Zeb1"]
GO:0050863	7	regulation of T cell activation	9	280	0.673557	2.09224e-08	1.76279e-07	["Bcl6","Foxp3","Gata3","Irf1","Irf4","Rara","Stat5a","Stat5b","Zeb1"]
GO:0002683	5	negative regulation of immune system process	10	384	0.923735	2.33804e-08	1.95529e-07	["Bcl6","Foxp3","Irf1","Irf3","Irf4","Nr1h3","Prdm1","Rara","Stat5a","Stat5b"]
GO:0019221	7	cytokine-mediated signaling pathway	10	386	0.928546	2.45536e-08	2.03831e-07	["Irf1","Irf2","Irf3","Irf4","Irf5","Irf7","Irf8","Irf9","Stat5a","Stat5b"]
GO:1903037	7	regulation of leukocyte cell-cell adhesion	9	289	0.695207	2.74752e-08	2.2642e-07	["Bcl6","Foxp3","Gata3","Irf1","Irf4","Rara","Stat5a","Stat5b","Zeb1"]
GO:0045582	9	positive regulation of T cell differentiation	6	77	0.185228	3.02672e-08	2.45839e-07	["Foxp3","Gata3","Irf1","Rara","Stat5a","Stat5b"]
GO:0046634	8	regulation of alpha-beta T cell activation	6	77	0.185228	3.02672e-08	2.45839e-07	["Bcl6","Foxp3","Gata3","Irf1","Irf4","Rara"]
GO:0044699	2	single-organism process	49	12631	30.3846	3.2454e-08	2.61718e-07	["Bbx","Bcl6","Cbfb","Dmrt2","Egr2","Foxc1","Foxf2","Foxg1","Foxi1","Foxj2","Foxj3","Foxk1","Foxo1","Foxo4","Foxp3","Gata3","Hnf4a","Irf1","Irf2","Irf3","Irf4","Irf7","Irf8","Klf4","Lhx3","Mecom","Nhlh1","Nr1h3","Nr1h4","Nr1i2","Nr1i3","Nr2f2","Pbx1","Pou2f1","Pou5f1","Prdm1","Rara","Rreb1","Rxra","Sox30","Srebf1","Stat5a","Stat5b","Tbx15","Tbx5","Trp53","Zeb1","Zfp39","Zic1"]
GO:0034110	7	regulation of homotypic cell-cell adhesion	9	298	0.716857	3.57576e-08	2.86315e-07	["Bcl6","Foxp3","Gata3","Irf1","Irf4","Rara","Stat5a","Stat5b","Zeb1"]
GO:0009719	3	response to endogenous stimulus	17	1492	3.58909	3.92302e-08	3.11908e-07	["Egr2","Foxo1","Gata3","Hnf4a","Irf1","Irf5","Klf4","Nr1h3","Nr1h4","Nr2f2","Rara","Rxra","Sox30","Srebf1","Stat5a","Stat5b","Zeb1"]
GO:0051726	5	regulation of cell cycle	14	965	2.32136	4.36155e-08	3.44349e-07	["Foxc1","Foxg1","Foxk1","Foxo4","Gata3","Hnf4a","Irf1","Mecom","Nr2f2","Pbx1","Rara","Stat5a","Stat5b","Trp53"]
GO:1902107	7	positive regulation of leukocyte differentiation	7	142	0.341589	4.82567e-08	3.78346e-07	["Foxp3","Gata3","Irf1","Prdm1","Rara","Stat5a","Stat5b"]
GO:0050776	5	regulation of immune response	13	825	1.98459	5.57886e-08	4.34381e-07	["Bcl6","Foxo1","Foxo4","Foxp3","Gata3","Irf1","Irf3","Irf4","Irf7","Nr1h3","Rara","Stat5a","Stat5b"]
GO:0002521	6	leukocyte differentiation	9	315	0.757751	5.75016e-08	4.44653e-07	["Bcl6","Cbfb","Foxp3","Gata3","Irf1","Irf4","Stat5a","Stat5b","Trp53"]
GO:0030098	5	lymphocyte differentiation	8	225	0.541251	6.29454e-08	4.83438e-07	["Bcl6","Cbfb","Foxp3","Gata3","Irf1","Stat5a","Stat5b","Trp53"]
GO:0048732	4	gland development	9	328	0.789024	8.11868e-08	6.19323e-07	["Foxc1","Gata3","Lhx3","Pbx1","Pou2f1","Rara","Rxra","Stat5a","Stat5b"]
GO:0002376	2	immune system process	18	1780	4.2819	8.58287e-08	6.5034e-07	["Bcl6","Cbfb","Foxo1","Foxo4","Foxp3","Gata3","Irf1","Irf3","Irf4","Irf5","Irf7","Irf8","Irf9","Mecom","Stat5a","Stat5b","Trp53","Zeb1"]
GO:0006367	8	transcription initiation from RNA polymerase II promoter	8	237	0.570118	9.39179e-08	7.06889e-07	["Hnf4a","Nr1h3","Nr1h4","Nr1i2","Nr1i3","Rara","Rxra","Tbx5"]
GO:0002684	5	positive regulation of immune system process	13	873	2.10005	1.07582e-07	8.0437e-07	["Bcl6","Foxc1","Foxp3","Gata3","Irf1","Irf3","Irf7","Nr1h3","Prdm1","Rara","Stat5a","Stat5b","Trp53"]
GO:0051251	7	positive regulation of lymphocyte activation	8	244	0.586957	1.17441e-07	8.72305e-07	["Bcl6","Foxp3","Gata3","Irf1","Prdm1","Rara","Stat5a","Stat5b"]
GO:0045351	7	type I interferon biosynthetic process	3	5	0.0120278	1.31134e-07	9.67652e-07	["Irf3","Irf7","Irf9"]
GO:0032753	7	positive regulation of interleukin-4 production	4	20	0.0481112	1.40783e-07	1.03211e-06	["Foxp3","Gata3","Irf4","Rara"]
GO:0014070	5	response to organic cyclic compound	14	1073	2.58117	1.61434e-07	1.17586e-06	["Egr2","Gata3","Hnf4a","Irf1","Irf3","Klf4","Nr1h3","Nr1h4","Nr2f2","Rara","Rxra","Sox30","Srebf1","Stat5b"]
GO:0032663	6	regulation of interleukin-2 production	5	53	0.127495	1.75147e-07	1.26757e-06	["Foxp3","Gata3","Irf4","Stat5a","Stat5b"]
GO:0010941	5	regulation of cell death	17	1662	3.99804	1.87206e-07	1.34622e-06	["Bcl6","Egr2","Foxc1","Foxo1","Gata3","Irf1","Irf5","Irf7","Klf4","Lhx3","Mecom","Rara","Rxra","Stat5a","Stat5b","Tbx5","Trp53"]
GO:0033993	5	response to lipid	14	1094	2.63168	2.04553e-07	1.45966e-06	["Gata3","Irf1","Irf3","Irf8","Klf4","Nr1h3","Nr1h4","Nr2f2","Pou5f1","Rara","Rxra","Sox30","Srebf1","Stat5b"]
GO:0046649	4	lymphocyte activation	9	366	0.880435	2.05568e-07	1.45966e-06	["Bcl6","Cbfb","Foxp3","Gata3","Irf1","Irf4","Stat5a","Stat5b","Trp53"]
GO:0045076	7	regulation of interleukin-2 biosynthetic process	4	22	0.0529223	2.11798e-07	1.4945e-06	["Foxp3","Irf4","Stat5a","Stat5b"]
GO:0043069	7	negative regulation of programmed cell death	13	938	2.25641	2.45791e-07	1.72359e-06	["Bcl6","Egr2","Foxc1","Foxo1","Gata3","Irf7","Klf4","Lhx3","Mecom","Rara","Stat5a","Stat5b","Trp53"]
GO:0002696	6	positive regulation of leukocyte activation	8	272	0.654312	2.69287e-07	1.8767e-06	["Bcl6","Foxp3","Gata3","Irf1","Prdm1","Rara","Stat5a","Stat5b"]
GO:0007275	4	multicellular organismal development	14	1123	2.70144	2.81226e-07	1.94788e-06	["Foxg1","Foxk1","Foxo4","Lhx3","Mecom","Nhlh1","Pbx1","Pou5f1","Prdm1","Rreb1","Tbx5","Trp53","Zfp39","Zic1"]
GO:0006352	7	DNA-templated transcription, initiation	8	275	0.661529	2.92709e-07	2.01505e-06	["Hnf4a","Nr1h3","Nr1h4","Nr1i2","Nr1i3","Rara","Rxra","Tbx5"]
GO:0031063	9	regulation of histone deacetylation	4	24	0.0577334	3.0657e-07	2.09768e-06	["Bcl6","Foxp3","Srebf1","Trp53"]
GO:0003002	5	regionalization	8	277	0.66634	3.09277e-07	2.09784e-06	["Dmrt2","Egr2","Foxc1","Foxg1","Lhx3","Nr2f2","Pbx1","Trp53"]
GO:0051707	3	response to other organism	10	507	1.21962	3.10309e-07	2.09784e-06	["Foxp3","Gata3","Irf1","Irf3","Irf4","Irf5","Irf7","Irf8","Irf9","Mecom"]
GO:0030155	5	regulation of cell adhesion	11	647	1.5564	3.25029e-07	2.18427e-06	["Bcl6","Foxp3","Gata3","Irf1","Irf4","Klf4","Rara","Rreb1","Stat5a","Stat5b","Zeb1"]
GO:0050867	6	positive regulation of cell activation	8	283	0.680773	3.63894e-07	2.43098e-06	["Bcl6","Foxp3","Gata3","Irf1","Prdm1","Rara","Stat5a","Stat5b"]
GO:0030217	6	T cell differentiation	6	118	0.283856	3.90169e-07	2.59118e-06	["Foxp3","Gata3","Irf1","Stat5a","Stat5b","Trp53"]
GO:0071310	5	cellular response to organic substance	15	1344	3.23307	3.97766e-07	2.62619e-06	["Egr2","Foxo1","Gata3","Irf1","Irf3","Irf8","Klf4","Nr1h3","Nr1h4","Rara","Rxra","Srebf1","Stat5a","Stat5b","Zeb1"]
GO:0032673	6	regulation of interleukin-4 production	4	26	0.0625445	4.29787e-07	2.80479e-06	["Foxp3","Gata3","Irf4","Rara"]
GO:0032728	8	positive regulation of interferon-beta production	4	26	0.0625445	4.29787e-07	2.80479e-06	["Irf1","Irf3","Irf5","Irf7"]
GO:0043067	6	regulation of programmed cell death	16	1556	3.74305	4.45146e-07	2.88085e-06	["Bcl6","Egr2","Foxc1","Foxo1","Gata3","Irf5","Irf7","Klf4","Lhx3","Mecom","Rara","Rxra","Stat5a","Stat5b","Tbx5","Trp53"]
GO:0010033	4	response to organic substance	20	2455	5.90565	4.46544e-07	2.88085e-06	["Egr2","Foxo1","Gata3","Hnf4a","Irf1","Irf3","Irf5","Irf8","Klf4","Nr1h3","Nr1h4","Nr2f2","Pou5f1","Rara","Rxra","Sox30","Srebf1","Stat5a","Stat5b","Zeb1"]
GO:0051704	2	multi-organism process	15	1364	3.28118	4.80292e-07	3.08096e-06	["Foxp3","Gata3","Irf1","Irf3","Irf4","Irf5","Irf7","Irf8","Irf9","Mecom","Rara","Rxra","Stat5a","Stat5b","Trp53"]
GO:0060548	6	negative regulation of cell death	13	1017	2.44645	6.16354e-07	3.93144e-06	["Bcl6","Egr2","Foxc1","Foxo1","Gata3","Irf7","Klf4","Lhx3","Mecom","Rara","Stat5a","Stat5b","Trp53"]
GO:0019216	6	regulation of lipid metabolic process	8	308	0.740912	6.89834e-07	4.37541e-06	["Hnf4a","Klf4","Nr1h3","Nr1h4","Rara","Srebf1","Stat5a","Stat5b"]
GO:1903707	6	negative regulation of hemopoiesis	6	131	0.315128	7.22561e-07	4.55738e-06	["Bcl6","Foxp3","Irf1","Rara","Stat5a","Stat5b"]
GO:1901698	4	response to nitrogen compound	13	1035	2.48975	7.51195e-07	4.71166e-06	["Egr2","Foxo1","Hnf4a","Irf1","Irf3","Irf5","Klf4","Nr1h4","Rxra","Srebf1","Stat5a","Stat5b","Zeb1"]
GO:0007548	4	sex differentiation	4	32	0.0769779	1.02279e-06	6.37974e-06	["Dmrt2","Hnf4a","Pbx1","Stat5b"]
GO:1901652	5	response to peptide	9	446	1.07288	1.07182e-06	6.64883e-06	["Egr2","Foxo1","Irf1","Irf5","Klf4","Rxra","Srebf1","Stat5a","Stat5b"]
GO:0032736	7	positive regulation of interleukin-13 production	3	9	0.02165	1.09404e-06	6.74958e-06	["Gata3","Irf4","Rara"]
GO:1903308	8	regulation of chromatin modification	6	141	0.339184	1.11229e-06	6.82486e-06	["Bcl6","Foxp3","Gata3","Pou5f1","Srebf1","Trp53"]
GO:0045321	3	leukocyte activation	9	449	1.0801	1.13289e-06	6.91369e-06	["Bcl6","Cbfb","Foxp3","Gata3","Irf1","Irf4","Stat5a","Stat5b","Trp53"]
GO:0048608	4	reproductive structure development	8	332	0.798646	1.21126e-06	7.35225e-06	["Foxc1","Foxf2","Gata3","Lhx3","Nr2f2","Prdm1","Rara","Rxra"]
GO:0009615	4	response to virus	7	231	0.555684	1.30972e-06	7.90736e-06	["Foxp3","Gata3","Irf1","Irf3","Irf5","Irf7","Irf9"]
GO:1902275	7	regulation of chromatin organization	6	147	0.353617	1.41893e-06	8.52113e-06	["Bcl6","Foxp3","Gata3","Pou5f1","Srebf1","Trp53"]
GO:0090311	8	regulation of protein deacetylation	4	35	0.0841946	1.48131e-06	8.84868e-06	["Bcl6","Foxp3","Srebf1","Trp53"]
GO:0032825	9	positive regulation of natural killer cell differentiation	3	10	0.0240556	1.56025e-06	9.2522e-06	["Irf1","Stat5a","Stat5b"]
GO:0043066	8	negative regulation of apoptotic process	12	926	2.22755	1.56525e-06	9.2522e-06	["Bcl6","Egr2","Foxc1","Foxo1","Gata3","Irf7","Klf4","Lhx3","Rara","Stat5a","Stat5b","Trp53"]
GO:1901701	5	cellular response to oxygen-containing compound	12	931	2.23958	1.6556e-06	9.73529e-06	["Egr2","Foxo1","Irf1","Irf3","Irf8","Klf4","Nr1h3","Nr1h4","Rara","Rxra","Srebf1","Zeb1"]
GO:0042110	5	T cell activation	7	241	0.57974	1.7366e-06	1.01587e-05	["Foxp3","Gata3","Irf1","Irf4","Stat5a","Stat5b","Trp53"]
GO:0070489	4	T cell aggregation	7	242	0.582145	1.78505e-06	1.03883e-05	["Foxp3","Gata3","Irf1","Irf4","Stat5a","Stat5b","Trp53"]
GO:0071593	7	lymphocyte aggregation	7	244	0.586957	1.88534e-06	1.09156e-05	["Foxp3","Gata3","Irf1","Irf4","Stat5a","Stat5b","Trp53"]
GO:0042221	3	response to chemical	21	2949	7.094	1.90442e-06	1.09698e-05	["Egr2","Foxo1","Gata3","Hnf4a","Irf1","Irf3","Irf5","Irf8","Klf4","Nr1h3","Nr1h4","Nr2f2","Pou5f1","Rara","Rxra","Sox30","Srebf1","Stat5a","Stat5b","Trp53","Zeb1"]
GO:0048568	4	embryonic organ development	6	156	0.375267	2.00564e-06	1.14943e-05	["Foxf2","Gata3","Pbx1","Prdm1","Rara","Trp53"]
GO:0033077	6	T cell differentiation in thymus	4	38	0.0914113	2.07716e-06	1.18092e-05	["Gata3","Stat5a","Stat5b","Trp53"]
GO:0032526	5	response to retinoic acid	6	157	0.377673	2.08151e-06	1.18092e-05	["Irf1","Klf4","Pou5f1","Rara","Rxra","Srebf1"]
GO:0001893	4	maternal placenta development	3	11	0.0264612	2.1417e-06	1.20297e-05	["Nr2f2","Prdm1","Rxra"]
GO:0045628	7	regulation of T-helper 2 cell differentiation	3	11	0.0264612	2.1417e-06	1.20297e-05	["Bcl6","Irf1","Rara"]
GO:0010243	4	response to organonitrogen compound	12	956	2.29971	2.18051e-06	1.21871e-05	["Egr2","Foxo1","Hnf4a","Irf1","Irf5","Klf4","Nr1h4","Rxra","Srebf1","Stat5a","Stat5b","Zeb1"]
GO:0042981	7	regulation of apoptotic process	15	1540	3.70456	2.21221e-06	1.22582e-05	["Bcl6","Egr2","Foxc1","Foxo1","Gata3","Irf5","Irf7","Klf4","Lhx3","Rara","Rxra","Stat5a","Stat5b","Tbx5","Trp53"]
GO:0070486	6	leukocyte aggregation	7	250	0.60139	2.21495e-06	1.22582e-05	["Foxp3","Gata3","Irf1","Irf4","Stat5a","Stat5b","Trp53"]
GO:0006952	4	defense response	14	1336	3.21383	2.23967e-06	1.23346e-05	["Bcl6","Foxo1","Foxo4","Gata3","Irf1","Irf3","Irf4","Irf5","Irf7","Irf8","Irf9","Mecom","Rxra","Stat5b"]
GO:0048585	5	negative regulation of response to stimulus	14	1339	3.22104	2.29943e-06	1.26013e-05	["Bcl6","Foxo1","Foxp3","Gata3","Hnf4a","Irf1","Irf3","Irf4","Klf4","Mecom","Nr1h3","Pou5f1","Prdm1","Trp53"]
GO:0071594	5	thymocyte aggregation	4	39	0.0938168	2.31043e-06	1.26013e-05	["Gata3","Stat5a","Stat5b","Trp53"]
GO:0080134	5	regulation of response to stress	14	1347	3.24029	2.46584e-06	1.33843e-05	["Bcl6","Foxo1","Foxp3","Gata3","Irf1","Irf3","Irf7","Klf4","Mecom","Nr1h3","Rreb1","Stat5a","Stat5b","Trp53"]
GO:0045165	5	cell fate commitment	6	162	0.389701	2.49688e-06	1.34879e-05	["Foxp3","Irf4","Pou5f1","Prdm1","Rara","Trp53"]
GO:0032648	7	regulation of interferon-beta production	4	40	0.0962224	2.56258e-06	1.37769e-05	["Irf1","Irf3","Irf5","Irf7"]
GO:0043371	11	negative regulation of CD4-positive, alpha-beta T cell differentiation	3	12	0.0288667	2.85073e-06	1.51815e-05	["Bcl6","Foxp3","Irf1"]
GO:0045623	7	negative regulation of T-helper cell differentiation	3	12	0.0288667	2.85073e-06	1.51815e-05	["Bcl6","Foxp3","Irf1"]
GO:0032102	6	negative regulation of response to external stimulus	7	260	0.625445	2.87105e-06	1.52179e-05	["Foxp3","Gata3","Irf3","Klf4","Nr1h3","Prdm1","Trp53"]
GO:0023057	5	negative regulation of signaling	13	1182	2.84337	3.29134e-06	1.73641e-05	["Bcl6","Foxo1","Gata3","Hnf4a","Irf1","Irf4","Klf4","Mecom","Nr1h3","Pou5f1","Prdm1","Srebf1","Trp53"]
GO:0071495	4	cellular response to endogenous stimulus	11	822	1.97737	3.3665e-06	1.7678e-05	["Egr2","Foxo1","Gata3","Irf1","Klf4","Nr1h4","Rara","Rxra","Srebf1","Stat5b","Zeb1"]
GO:0010648	6	negative regulation of cell communication	13	1190	2.86262	3.54426e-06	1.85253e-05	["Bcl6","Foxo1","Gata3","Hnf4a","Irf1","Irf4","Klf4","Mecom","Nr1h3","Pou5f1","Prdm1","Srebf1","Trp53"]
GO:0031065	8	positive regulation of histone deacetylation	3	13	0.0312723	3.69964e-06	1.90726e-05	["Bcl6","Srebf1","Trp53"]
GO:0032656	6	regulation of interleukin-13 production	3	13	0.0312723	3.69964e-06	1.90726e-05	["Gata3","Irf4","Rara"]
GO:2000515	10	negative regulation of CD4-positive, alpha-beta T cell activation	3	13	0.0312723	3.69964e-06	1.90726e-05	["Bcl6","Foxp3","Irf1"]
GO:0009725	4	response to hormone	12	1009	2.42721	3.80512e-06	1.95272e-05	["Egr2","Foxo1","Gata3","Irf1","Nr1h3","Nr2f2","Rara","Rxra","Sox30","Srebf1","Stat5a","Stat5b"]
GO:1901699	5	cellular response to nitrogen compound	9	523	1.25811	3.95221e-06	2.01902e-05	["Egr2","Foxo1","Irf1","Irf3","Klf4","Nr1h4","Rxra","Srebf1","Zeb1"]
GO:0009790	4	embryo development	8	390	0.938168	3.99928e-06	2.03387e-05	["Foxc1","Foxi1","Gata3","Mecom","Nr2f2","Prdm1","Rxra","Trp53"]
GO:0034121	5	regulation of toll-like receptor signaling pathway	4	45	0.10825	4.14078e-06	2.09638e-05	["Irf1","Irf4","Irf7","Nr1h3"]
GO:0070887	4	cellular response to chemical stimulus	15	1633	3.92828	4.55932e-06	2.29798e-05	["Egr2","Foxo1","Gata3","Irf1","Irf3","Irf8","Klf4","Nr1h3","Nr1h4","Rara","Rxra","Srebf1","Stat5a","Stat5b","Zeb1"]
GO:0032674	6	regulation of interleukin-5 production	3	14	0.0336778	4.70061e-06	2.34823e-05	["Foxp3","Gata3","Rara"]
GO:0032823	8	regulation of natural killer cell differentiation	3	14	0.0336778	4.70061e-06	2.34823e-05	["Irf1","Stat5a","Stat5b"]
GO:0007159	5	leukocyte cell-cell adhesion	7	282	0.678368	4.89989e-06	2.437e-05	["Foxp3","Gata3","Irf1","Irf4","Stat5a","Stat5b","Trp53"]
GO:0050870	8	positive regulation of T cell activation	6	184	0.442623	5.20712e-06	2.57844e-05	["Foxp3","Gata3","Irf1","Rara","Stat5a","Stat5b"]
GO:0039530	5	MDA-5 signaling pathway	2	2	0.00481112	5.67981e-06	2.80022e-05	["Irf3","Irf7"]
GO:0032727	8	positive regulation of interferon-alpha production	3	15	0.0360834	5.86576e-06	2.84248e-05	["Irf3","Irf5","Irf7"]
GO:0045086	8	positive regulation of interleukin-2 biosynthetic process	3	15	0.0360834	5.86576e-06	2.84248e-05	["Irf4","Stat5a","Stat5b"]
GO:0046639	10	negative regulation of alpha-beta T cell differentiation	3	15	0.0360834	5.86576e-06	2.84248e-05	["Bcl6","Foxp3","Irf1"]
GO:0044763	3	single-organism cellular process	40	9820	23.6226	5.88339e-06	2.84248e-05	["Bcl6","Cbfb","Egr2","Foxc1","Foxf2","Foxg1","Foxj2","Foxj3","Foxk1","Foxo1","Foxo4","Foxp3","Gata3","Hnf4a","Irf1","Irf3","Irf4","Irf8","Klf4","Lhx3","Mecom","Nhlh1","Nr1h3","Nr1h4","Nr1i3","Nr2f2","Pbx1","Pou2f1","Pou5f1","Prdm1","Rara","Rxra","Srebf1","Stat5a","Stat5b","Tbx5","Trp53","Zeb1","Zfp39","Zic1"]
GO:0034112	8	positive regulation of homotypic cell-cell adhesion	6	188	0.452245	5.89141e-06	2.84248e-05	["Foxp3","Gata3","Irf1","Rara","Stat5a","Stat5b"]
GO:1903034	6	regulation of response to wounding	8	412	0.991091	5.98131e-06	2.87358e-05	["Bcl6","Foxp3","Gata3","Klf4","Nr1h3","Rreb1","Stat5a","Stat5b"]
GO:0050727	6	regulation of inflammatory response	7	291	0.700018	6.01898e-06	2.87942e-05	["Bcl6","Foxp3","Gata3","Klf4","Nr1h3","Stat5a","Stat5b"]
GO:1903039	8	positive regulation of leukocyte cell-cell adhesion	6	189	0.454651	6.07342e-06	2.8932e-05	["Foxp3","Gata3","Irf1","Rara","Stat5a","Stat5b"]
GO:0050670	7	regulation of lymphocyte proliferation	6	190	0.457056	6.25997e-06	2.96954e-05	["Bcl6","Foxp3","Irf1","Prdm1","Stat5a","Stat5b"]
GO:0009968	6	negative regulation of signal transduction	12	1060	2.54989	6.29844e-06	2.97529e-05	["Bcl6","Foxo1","Gata3","Hnf4a","Irf1","Irf4","Klf4","Mecom","Nr1h3","Pou5f1","Prdm1","Trp53"]
GO:0007165	5	signal transduction	29	5637	13.5601	6.44014e-06	3.02955e-05	["Bcl6","Foxc1","Foxo1","Foxo4","Foxp3","Gata3","Hnf4a","Irf1","Irf2","Irf3","Irf4","Irf5","Irf7","Irf8","Irf9","Klf4","Nr1h3","Nr1h4","Nr1i2","Nr1i3","Nr2f2","Pou5f1","Rara","Rreb1","Rxra","Srebf1","Stat5a","Stat5b","Trp53"]
GO:0032944	7	regulation of mononuclear cell proliferation	6	192	0.461867	6.64705e-06	3.11391e-05	["Bcl6","Foxp3","Irf1","Prdm1","Stat5a","Stat5b"]
GO:0001701	7	in utero embryonic development	7	296	0.712046	6.72757e-06	3.13861e-05	["Foxc1","Gata3","Mecom","Nr2f2","Prdm1","Rxra","Trp53"]
GO:0002360	6	T cell lineage commitment	3	16	0.038489	7.20711e-06	3.34849e-05	["Foxp3","Irf4","Trp53"]
GO:0001709	5	cell fate determination	4	52	0.125089	7.43061e-06	3.43818e-05	["Foxg1","Gata3","Klf4","Pou5f1"]
GO:0048583	4	regulation of response to stimulus	22	3494	8.40502	7.59487e-06	3.49984e-05	["Bcl6","Foxo1","Foxo4","Foxp3","Gata3","Hnf4a","Irf1","Irf3","Irf4","Irf7","Klf4","Mecom","Nr1h3","Pou5f1","Prdm1","Rara","Rreb1","Stat5a","Stat5b","Trp53","Zeb1","Zic1"]
GO:0043009	6	chordate embryonic development	7	302	0.726479	7.66822e-06	3.51927e-05	["Foxc1","Gata3","Mecom","Nr2f2","Prdm1","Rxra","Trp53"]
GO:0034109	5	homotypic cell-cell adhesion	7	304	0.73129	8.00507e-06	3.64254e-05	["Foxp3","Gata3","Irf1","Irf4","Stat5a","Stat5b","Trp53"]
GO:0050864	7	regulation of B cell activation	5	114	0.274234	8.01894e-06	3.64254e-05	["Bcl6","Foxp3","Prdm1","Stat5a","Stat5b"]
GO:0002697	5	regulation of immune effector process	8	429	1.03199	8.0336e-06	3.64254e-05	["Bcl6","Foxp3","Irf1","Irf3","Irf4","Rara","Stat5a","Stat5b"]
GO:0070663	6	regulation of leukocyte proliferation	6	199	0.478706	8.15791e-06	3.68411e-05	["Bcl6","Foxp3","Irf1","Prdm1","Stat5a","Stat5b"]
GO:0045579	9	positive regulation of B cell differentiation	3	17	0.0408945	8.73659e-06	3.92972e-05	["Prdm1","Stat5a","Stat5b"]
GO:0009792	5	embryo development ending in birth or egg hatching	7	309	0.743318	8.90141e-06	3.98797e-05	["Foxc1","Gata3","Mecom","Nr2f2","Prdm1","Rxra","Trp53"]
GO:0010565	6	regulation of cellular ketone metabolic process	6	205	0.49314	9.66449e-06	4.31273e-05	["Foxo1","Gata3","Hnf4a","Nr1h3","Nr1h4","Srebf1"]
GO:0032647	7	regulation of interferon-alpha production	3	18	0.0433001	1.04661e-05	4.64045e-05	["Irf3","Irf5","Irf7"]
GO:0002252	3	immune effector process	8	445	1.07047	1.04811e-05	4.64045e-05	["Foxp3","Gata3","Irf1","Irf3","Irf5","Irf7","Irf9","Trp53"]
GO:0007565	4	female pregnancy	5	121	0.291073	1.07215e-05	4.72834e-05	["Irf1","Rara","Rxra","Stat5a","Stat5b"]
GO:0031347	6	regulation of defense response	10	757	1.82101	1.11905e-05	4.91598e-05	["Bcl6","Foxp3","Gata3","Irf1","Irf3","Irf7","Klf4","Nr1h3","Stat5a","Stat5b"]
GO:0051246	6	regulation of protein metabolic process	18	2488	5.98503	1.13379e-05	4.96145e-05	["Bcl6","Foxo1","Foxp3","Gata3","Hnf4a","Irf1","Irf3","Irf4","Klf4","Mecom","Nr1h3","Nr2f2","Rara","Rxra","Srebf1","Stat5a","Stat5b","Trp53"]
GO:0001818	6	negative regulation of cytokine production	6	211	0.507573	1.13891e-05	4.9646e-05	["Bcl6","Foxp3","Gata3","Irf3","Klf4","Rara"]
GO:0042089	6	cytokine biosynthetic process	3	19	0.0457056	1.24073e-05	5.3465e-05	["Irf3","Irf7","Irf9"]
GO:0045723	8	positive regulation of fatty acid biosynthetic process	3	19	0.0457056	1.24073e-05	5.3465e-05	["Hnf4a","Nr1h3","Srebf1"]
GO:0090312	9	positive regulation of protein deacetylation	3	19	0.0457056	1.24073e-05	5.3465e-05	["Bcl6","Srebf1","Trp53"]
GO:0031056	8	regulation of histone modification	5	125	0.300695	1.25573e-05	5.39058e-05	["Bcl6","Foxp3","Gata3","Srebf1","Trp53"]
GO:0045786	6	negative regulation of cell cycle	8	467	1.1234	1.48532e-05	6.35198e-05	["Foxc1","Foxk1","Foxo4","Gata3","Hnf4a","Irf1","Nr2f2","Trp53"]
GO:0048534	4	hematopoietic or lymphoid organ development	6	222	0.534034	1.51952e-05	6.47371e-05	["Cbfb","Gata3","Klf4","Pbx1","Stat5a","Stat5b"]
GO:0051716	3	cellular response to stimulus	19	2810	6.75962	1.56109e-05	6.62582e-05	["Bcl6","Egr2","Foxo1","Foxo4","Gata3","Irf1","Irf3","Irf7","Irf8","Klf4","Nr1h3","Nr1h4","Rara","Rxra","Srebf1","Stat5a","Stat5b","Trp53","Zeb1"]
GO:0022409	7	positive regulation of cell-cell adhesion	6	224	0.538845	1.59863e-05	6.75976e-05	["Foxp3","Gata3","Irf1","Rara","Stat5a","Stat5b"]
GO:0034124	6	regulation of MyD88-dependent toll-like receptor signaling pathway	2	3	0.00721668	1.70131e-05	7.08775e-05	["Irf1","Irf7"]
GO:0038161	7	prolactin signaling pathway	2	3	0.00721668	1.70131e-05	7.08775e-05	["Stat5a","Stat5b"]
GO:0046544	5	development of secondary male sexual characteristics	2	3	0.00721668	1.70131e-05	7.08775e-05	["Stat5a","Stat5b"]
GO:0048294	7	negative regulation of isotype switching to IgE isotypes	2	3	0.00721668	1.70131e-05	7.08775e-05	["Bcl6","Foxp3"]
GO:0033044	6	regulation of chromosome organization	6	227	0.546062	1.72352e-05	7.15387e-05	["Bcl6","Foxp3","Gata3","Pou5f1","Srebf1","Trp53"]
GO:0044702	3	single organism reproductive process	12	1175	2.82653	1.77596e-05	7.34454e-05	["Bcl6","Foxc1","Foxf2","Gata3","Lhx3","Nr2f2","Prdm1","Rara","Rxra","Sox30","Stat5a","Zfp39"]
GO:0032101	5	regulation of response to external stimulus	10	800	1.92445	1.80405e-05	7.43347e-05	["Bcl6","Foxp3","Gata3","Irf3","Klf4","Nr1h3","Prdm1","Stat5a","Stat5b","Trp53"]
GO:0048731	4	system development	11	989	2.3791	1.92766e-05	7.91391e-05	["Dmrt2","Egr2","Foxc1","Foxf2","Gata3","Mecom","Nhlh1","Pbx1","Trp53","Zeb1","Zic1"]
GO:0046636	9	negative regulation of alpha-beta T cell activation	3	22	0.0529223	1.9618e-05	8.0249e-05	["Bcl6","Foxp3","Irf1"]
GO:0048872	5	homeostasis of number of cells	5	138	0.331967	2.02689e-05	8.26124e-05	["Foxp3","Gata3","Mecom","Stat5a","Stat5b"]
GO:0042108	7	positive regulation of cytokine biosynthetic process	4	67	0.161172	2.04834e-05	8.3186e-05	["Irf1","Irf4","Stat5a","Stat5b"]
GO:0071417	5	cellular response to organonitrogen compound	8	490	1.17872	2.09769e-05	8.48849e-05	["Egr2","Foxo1","Irf1","Klf4","Nr1h4","Rxra","Srebf1","Zeb1"]
GO:0001776	3	leukocyte homeostasis	4	68	0.163578	2.17249e-05	8.75978e-05	["Foxp3","Mecom","Stat5a","Stat5b"]
GO:0007346	6	regulation of mitotic cell cycle	8	493	1.18594	2.19132e-05	8.80429e-05	["Foxc1","Foxg1","Foxo4","Hnf4a","Pbx1","Stat5a","Stat5b","Trp53"]
GO:0032816	8	positive regulation of natural killer cell activation	3	23	0.0553279	2.25223e-05	9.01691e-05	["Irf1","Stat5a","Stat5b"]
GO:0045926	5	negative regulation of growth	6	241	0.57974	2.41493e-05	9.6341e-05	["Bcl6","Foxk1","Hnf4a","Irf8","Tbx5","Trp53"]
GO:0050871	8	positive regulation of B cell activation	4	70	0.168389	2.43726e-05	9.68896e-05	["Bcl6","Prdm1","Stat5a","Stat5b"]
GO:0051607	4	defense response to virus	5	144	0.346401	2.48801e-05	9.84361e-05	["Irf1","Irf3","Irf5","Irf7","Irf9"]
GO:0001101	4	response to acid chemical	8	502	1.20759	2.4936e-05	9.84361e-05	["Irf1","Klf4","Nr1h4","Pou5f1","Rara","Rxra","Srebf1","Zeb1"]
GO:0071396	6	cellular response to lipid	8	503	1.21	2.52925e-05	9.94955e-05	["Irf1","Irf3","Irf8","Klf4","Nr1h3","Nr1h4","Rara","Srebf1"]
GO:0031058	7	positive regulation of histone modification	4	71	0.170795	2.57818e-05	0.000101068	["Bcl6","Foxp3","Srebf1","Trp53"]
GO:0001775	4	cell activation	9	663	1.59489	2.62529e-05	0.000102559	["Bcl6","Cbfb","Foxp3","Gata3","Irf1","Irf4","Stat5a","Stat5b","Trp53"]
GO:0023051	4	regulation of signaling	19	2916	7.01461	2.65185e-05	0.000102792	["Bcl6","Egr2","Foxo1","Gata3","Hnf4a","Irf1","Irf3","Irf4","Irf7","Klf4","Mecom","Nr1h3","Pou5f1","Prdm1","Rara","Srebf1","Trp53","Zeb1","Zic1"]
GO:0051248	7	negative regulation of protein metabolic process	11	1024	2.46329	2.65796e-05	0.000102792	["Foxo1","Foxp3","Hnf4a","Irf1","Irf3","Klf4","Mecom","Nr1h3","Nr2f2","Rara","Trp53"]
GO:0002695	6	negative regulation of leukocyte activation	5	146	0.351212	2.65857e-05	0.000102792	["Bcl6","Foxp3","Irf1","Nr1h3","Prdm1"]
GO:0008202	5	steroid metabolic process	6	247	0.594173	2.77249e-05	0.000106831	["Nr1h4","Nr1i2","Pbx1","Rxra","Srebf1","Stat5b"]
GO:0045785	6	positive regulation of cell adhesion	7	370	0.890057	2.8403e-05	0.000109071	["Foxp3","Gata3","Irf1","Rara","Rreb1","Stat5a","Stat5b"]
GO:0010646	5	regulation of cell communication	19	2933	7.05551	2.87994e-05	0.000110219	["Bcl6","Egr2","Foxo1","Gata3","Hnf4a","Irf1","Irf3","Irf4","Irf7","Klf4","Mecom","Nr1h3","Pou5f1","Prdm1","Rara","Srebf1","Trp53","Zeb1","Zic1"]
GO:0051247	7	positive regulation of protein metabolic process	13	1448	3.48325	2.91195e-05	0.000110439	["Bcl6","Foxo1","Foxp3","Irf1","Irf4","Klf4","Nr1h3","Rara","Rxra","Srebf1","Stat5a","Stat5b","Trp53"]
GO:0002828	6	regulation of type 2 immune response	3	25	0.060139	2.91503e-05	0.000110439	["Bcl6","Irf1","Rara"]
GO:0042107	5	cytokine metabolic process	3	25	0.060139	2.91503e-05	0.000110439	["Irf3","Irf7","Irf9"]
GO:0031348	6	negative regulation of defense response	5	150	0.360834	3.02687e-05	0.000114287	["Foxp3","Gata3","Irf3","Klf4","Nr1h3"]
GO:0042472	5	inner ear morphogenesis	4	74	0.178011	3.03687e-05	0.000114287	["Foxg1","Foxi1","Gata3","Zic1"]
GO:0040008	4	regulation of growth	9	680	1.63578	3.20048e-05	0.000119713	["Bcl6","Foxc1","Foxk1","Hnf4a","Irf8","Stat5a","Stat5b","Tbx5","Trp53"]
GO:1903310	6	positive regulation of chromatin modification	4	75	0.180417	3.20225e-05	0.000119713	["Bcl6","Foxp3","Srebf1","Trp53"]
GO:0098542	4	defense response to other organism	7	378	0.909301	3.25485e-05	0.000121278	["Irf1","Irf3","Irf4","Irf5","Irf7","Irf8","Irf9"]
GO:0006549	6	isoleucine metabolic process	2	4	0.00962224	3.39737e-05	0.000124939	["Stat5a","Stat5b"]
GO:0045829	6	negative regulation of isotype switching	2	4	0.00962224	3.39737e-05	0.000124939	["Bcl6","Foxp3"]
GO:0046449	5	creatinine metabolic process	2	4	0.00962224	3.39737e-05	0.000124939	["Stat5a","Stat5b"]
GO:0046543	5	development of secondary female sexual characteristics	2	4	0.00962224	3.39737e-05	0.000124939	["Stat5a","Stat5b"]
GO:0007423	4	sensory organ development	5	155	0.372862	3.54163e-05	0.000129387	["Foxc1","Gata3","Klf4","Rara","Rxra"]
GO:0002460	5	adaptive immune response based on somatic recombination of immune receptors built from immunoglobulin superfamily domains	4	77	0.185228	3.55271e-05	0.000129387	["Bcl6","Foxp3","Gata3","Irf7"]
GO:0032481	7	positive regulation of type I interferon production	4	77	0.185228	3.55271e-05	0.000129387	["Irf1","Irf3","Irf5","Irf7"]
GO:0043372	11	positive regulation of CD4-positive, alpha-beta T cell differentiation	3	27	0.0649501	3.69456e-05	0.000134121	["Foxp3","Irf1","Rara"]
GO:0019827	4	stem cell maintenance	5	157	0.377673	3.76556e-05	0.00013626	["Foxo1","Klf4","Mecom","Pbx1","Pou5f1"]
GO:0098727	3	maintenance of cell number	5	159	0.382484	4.00031e-05	0.000144292	["Foxo1","Klf4","Mecom","Pbx1","Pou5f1"]
GO:0032689	7	negative regulation of interferon-gamma production	3	28	0.0673557	4.13086e-05	0.000148527	["Foxp3","Gata3","Rara"]
GO:0042036	7	negative regulation of cytokine biosynthetic process	3	29	0.0697612	4.59967e-05	0.000164406	["Foxp3","Irf3","Klf4"]
GO:0060284	6	regulation of cell development	10	893	2.14816	4.60163e-05	0.000164406	["Bcl6","Foxc1","Foxg1","Gata3","Pbx1","Rara","Rreb1","Tbx5","Trp53","Zeb1"]
GO:0050866	6	negative regulation of cell activation	5	164	0.394512	4.63693e-05	0.000165145	["Bcl6","Foxp3","Irf1","Nr1h3","Prdm1"]
GO:1902106	7	negative regulation of leukocyte differentiation	4	83	0.199661	4.77304e-05	0.000169458	["Bcl6","Foxp3","Irf1","Rara"]
GO:0043434	5	response to peptide hormone	7	405	0.974252	5.03878e-05	0.000178332	["Egr2","Foxo1","Irf1","Rxra","Srebf1","Stat5a","Stat5b"]
GO:0045577	8	regulation of B cell differentiation	3	30	0.0721668	5.10205e-05	0.000180007	["Prdm1","Stat5a","Stat5b"]
GO:0002699	6	positive regulation of immune effector process	5	168	0.404134	5.2005e-05	0.000182908	["Foxp3","Irf1","Rara","Stat5a","Stat5b"]
GO:0030900	4	forebrain development	4	85	0.204473	5.24051e-05	0.000183743	["Foxg1","Mecom","Nr2f2","Zeb1"]
GO:0032735	7	positive regulation of interleukin-12 production	3	31	0.0745723	5.63909e-05	0.000194007	["Irf1","Irf5","Irf8"]
GO:0032814	7	regulation of natural killer cell activation	3	31	0.0745723	5.63909e-05	0.000194007	["Irf1","Stat5a","Stat5b"]
GO:0045581	9	negative regulation of T cell differentiation	3	31	0.0745723	5.63909e-05	0.000194007	["Bcl6","Foxp3","Irf1"]
GO:2000516	10	positive regulation of CD4-positive, alpha-beta T cell activation	3	31	0.0745723	5.63909e-05	0.000194007	["Foxp3","Irf1","Rara"]
GO:0000255	5	allantoin metabolic process	2	5	0.0120278	5.65354e-05	0.000194007	["Stat5a","Stat5b"]
GO:0045629	8	negative regulation of T-helper 2 cell differentiation	2	5	0.0120278	5.65354e-05	0.000194007	["Bcl6","Irf1"]
GO:0072338	4	cellular lactam metabolic process	2	5	0.0120278	5.65354e-05	0.000194007	["Stat5a","Stat5b"]
GO:0050778	6	positive regulation of immune response	8	568	1.36636	5.97229e-05	0.000203897	["Foxp3","Gata3","Irf1","Irf3","Irf7","Rara","Stat5a","Stat5b"]
GO:0044706	3	multi-multicellular organism process	5	173	0.416162	5.97786e-05	0.000203897	["Irf1","Rara","Rxra","Stat5a","Stat5b"]
GO:1902532	7	negative regulation of intracellular signal transduction	7	418	1.00552	6.14743e-05	0.00020905	["Bcl6","Foxo1","Hnf4a","Irf1","Klf4","Mecom","Pou5f1"]
GO:0043029	5	T cell homeostasis	3	32	0.0769779	6.21186e-05	0.000210606	["Foxp3","Stat5a","Stat5b"]
GO:0009966	5	regulation of signal transduction	17	2551	6.13658	6.27031e-05	0.000211952	["Bcl6","Foxo1","Gata3","Hnf4a","Irf1","Irf3","Irf4","Irf7","Klf4","Mecom","Nr1h3","Pou5f1","Prdm1","Rara","Trp53","Zeb1","Zic1"]
GO:0048729	4	tissue morphogenesis	7	420	1.01033	6.33449e-05	0.000213482	["Foxc1","Gata3","Klf4","Pbx1","Rxra","Stat5a","Tbx5"]
GO:0002237	5	response to molecule of bacterial origin	7	421	1.01274	6.42975e-05	0.000216047	["Irf3","Irf5","Irf8","Nr1h3","Nr1h4","Rara","Stat5b"]
GO:0045471	6	response to ethanol	5	176	0.423378	6.48556e-05	0.000217276	["Gata3","Rara","Rxra","Stat5a","Stat5b"]
GO:0060429	5	epithelium development	6	288	0.692801	6.51916e-05	0.000217755	["Foxc1","Gata3","Mecom","Rara","Stat5a","Tbx5"]
GO:0006955	3	immune response	11	1136	2.73272	6.83465e-05	0.000227259	["Bcl6","Foxo1","Foxo4","Foxp3","Gata3","Irf1","Irf3","Irf5","Irf7","Irf8","Zeb1"]
GO:0032649	6	regulation of interferon-gamma production	4	91	0.218906	6.84395e-05	0.000227259	["Foxp3","Gata3","Irf8","Rara"]
GO:0043010	6	camera-type eye development	4	92	0.221311	7.14233e-05	0.000236472	["Foxc1","Klf4","Rara","Rxra"]
GO:0048545	5	response to steroid hormone	8	586	1.40966	7.42716e-05	0.000245183	["Gata3","Nr1h3","Nr2f2","Rara","Rxra","Sox30","Srebf1","Stat5b"]
GO:0046006	9	regulation of activated T cell proliferation	3	34	0.081789	7.46885e-05	0.000245841	["Foxp3","Stat5a","Stat5b"]
GO:0022603	5	regulation of anatomical structure morphogenesis	10	953	2.2925	7.92881e-05	0.000260222	["Bcl6","Dmrt2","Foxc1","Foxo4","Gata3","Hnf4a","Klf4","Rreb1","Rxra","Tbx5"]
GO:0032743	7	positive regulation of interleukin-2 production	3	35	0.0841946	8.15517e-05	0.000265636	["Irf4","Stat5a","Stat5b"]
GO:0050869	8	negative regulation of B cell activation	3	35	0.0841946	8.15517e-05	0.000265636	["Bcl6","Foxp3","Prdm1"]
GO:0071229	5	cellular response to acid chemical	6	300	0.721668	8.16437e-05	0.000265636	["Irf1","Klf4","Nr1h4","Rara","Srebf1","Zeb1"]
GO:0039528	4	cytoplasmic pattern recognition receptor signaling pathway in response to virus	2	6	0.0144334	8.46721e-05	0.000273128	["Irf3","Irf7"]
GO:0045764	7	positive regulation of cellular amino acid metabolic process	2	6	0.0144334	8.46721e-05	0.000273128	["Gata3","Nr1h4"]
GO:2000189	6	positive regulation of cholesterol homeostasis	2	6	0.0144334	8.46721e-05	0.000273128	["Hnf4a","Nr1h3"]
GO:0032269	7	negative regulation of cellular protein metabolic process	10	963	2.31655	8.64635e-05	0.000278112	["Foxo1","Foxp3","Hnf4a","Irf1","Klf4","Mecom","Nr1h3","Nr2f2","Rara","Trp53"]
GO:0019218	7	regulation of steroid metabolic process	4	98	0.235745	9.13564e-05	0.000292185	["Nr1h4","Srebf1","Stat5a","Stat5b"]
GO:2001252	7	positive regulation of chromosome organization	4	98	0.235745	9.13564e-05	0.000292185	["Bcl6","Foxp3","Srebf1","Trp53"]
GO:0009888	4	tissue development	9	781	1.87874	9.31359e-05	0.000297035	["Foxc1","Gata3","Mecom","Nr2f2","Rara","Rxra","Stat5a","Stat5b","Tbx5"]
GO:0042304	7	regulation of fatty acid biosynthetic process	3	37	0.0890057	9.64865e-05	0.000305992	["Hnf4a","Nr1h3","Srebf1"]
GO:0045923	7	positive regulation of fatty acid metabolic process	3	37	0.0890057	9.64865e-05	0.000305992	["Hnf4a","Nr1h3","Srebf1"]
GO:0044703	3	multi-organism reproductive process	5	197	0.473895	0.000110365	0.000349024	["Irf1","Rara","Rxra","Stat5a","Stat5b"]
GO:2000106	8	regulation of leukocyte apoptotic process	4	103	0.247773	0.000110827	0.000349508	["Bcl6","Irf7","Stat5a","Trp53"]
GO:0046632	7	alpha-beta T cell differentiation	3	39	0.0938168	0.000113101	0.000354698	["Foxp3","Gata3","Irf1"]
GO:0055007	7	cardiac muscle cell differentiation	3	39	0.0938168	0.000113101	0.000354698	["Rara","Rxra","Tbx5"]
GO:0002698	6	negative regulation of immune effector process	4	104	0.250178	0.000115056	0.000359828	["Bcl6","Foxp3","Irf1","Irf3"]
GO:0010467	5	gene expression	9	804	1.93407	0.000116096	0.000362078	["Hnf4a","Nr1h3","Nr1h4","Nr1i2","Nr1i3","Pou2f1","Rara","Rxra","Tbx5"]
GO:0019530	5	taurine metabolic process	2	7	0.0168389	0.000118358	0.000363115	["Stat5a","Stat5b"]
GO:0032754	7	positive regulation of interleukin-5 production	2	7	0.0168389	0.000118358	0.000363115	["Gata3","Rara"]
GO:0045136	4	development of secondary sexual characteristics	2	7	0.0168389	0.000118358	0.000363115	["Stat5a","Stat5b"]
GO:0045588	10	positive regulation of gamma-delta T cell differentiation	2	7	0.0168389	0.000118358	0.000363115	["Stat5a","Stat5b"]
GO:0048293	7	regulation of isotype switching to IgE isotypes	2	7	0.0168389	0.000118358	0.000363115	["Bcl6","Foxp3"]
GO:0055012	8	ventricular cardiac muscle cell differentiation	2	7	0.0168389	0.000118358	0.000363115	["Rara","Rxra"]
GO:0032870	5	cellular response to hormone stimulus	7	465	1.11859	0.00011948	0.000365562	["Egr2","Foxo1","Irf1","Rara","Rxra","Srebf1","Stat5b"]
GO:0050728	7	negative regulation of inflammatory response	4	107	0.257395	0.000128444	0.000391622	["Foxp3","Gata3","Klf4","Nr1h3"]
GO:0045787	6	positive regulation of cell cycle	6	326	0.784212	0.000128691	0.000391622	["Foxg1","Pbx1","Rara","Stat5a","Stat5b","Trp53"]
GO:0016337	4	single organismal cell-cell adhesion	7	476	1.14505	0.00013805	0.000418975	["Foxp3","Gata3","Irf1","Irf4","Stat5a","Stat5b","Trp53"]
GO:0045620	8	negative regulation of lymphocyte differentiation	3	42	0.101033	0.00014135	0.000426694	["Bcl6","Foxp3","Irf1"]
GO:0046638	10	positive regulation of alpha-beta T cell differentiation	3	42	0.101033	0.00014135	0.000426694	["Foxp3","Irf1","Rara"]
GO:0007166	6	cell surface receptor signaling pathway	21	3893	9.36484	0.000143649	0.000432479	["Foxc1","Foxo1","Foxo4","Foxp3","Gata3","Irf1","Irf2","Irf3","Irf4","Irf5","Irf7","Irf8","Irf9","Klf4","Nr1h3","Nr1h4","Pou5f1","Srebf1","Stat5a","Stat5b","Trp53"]
GO:0060759	5	regulation of response to cytokine stimulus	4	111	0.267017	0.000148007	0.000444413	["Irf3","Irf7","Klf4","Nr1h3"]
GO:0032479	6	regulation of type I interferon production	4	112	0.269423	0.000153216	0.000458835	["Irf1","Irf3","Irf5","Irf7"]
GO:0002713	9	negative regulation of B cell mediated immunity	2	8	0.0192445	0.000157567	0.000463264	["Bcl6","Foxp3"]
GO:0002890	10	negative regulation of immunoglobulin mediated immune response	2	8	0.0192445	0.000157567	0.000463264	["Bcl6","Foxp3"]
GO:0006573	6	valine metabolic process	2	8	0.0192445	0.000157567	0.000463264	["Stat5a","Stat5b"]
GO:0043373	8	CD4-positive, alpha-beta T cell lineage commitment	2	8	0.0192445	0.000157567	0.000463264	["Foxp3","Irf4"]
GO:0045647	6	negative regulation of erythrocyte differentiation	2	8	0.0192445	0.000157567	0.000463264	["Stat5a","Stat5b"]
GO:0046645	9	positive regulation of gamma-delta T cell activation	2	8	0.0192445	0.000157567	0.000463264	["Stat5a","Stat5b"]
GO:0060340	8	positive regulation of type I interferon-mediated signaling pathway	2	8	0.0192445	0.000157567	0.000463264	["Irf3","Irf7"]
GO:0048609	3	multicellular organismal reproductive process	8	657	1.58045	0.000163566	0.000479653	["Bcl6","Nr2f2","Prdm1","Rara","Rxra","Sox30","Stat5a","Zfp39"]
GO:0032655	6	regulation of interleukin-12 production	3	45	0.10825	0.000173828	0.000508424	["Irf1","Irf5","Irf8"]
GO:0060135	4	maternal process involved in female pregnancy	3	46	0.110656	0.00018564	0.000541569	["Nr2f2","Prdm1","Rxra"]
GO:0045995	6	regulation of embryonic development	4	118	0.283856	0.000187301	0.000543605	["Dmrt2","Gata3","Hnf4a","Klf4"]
GO:0050671	8	positive regulation of lymphocyte proliferation	4	118	0.283856	0.000187301	0.000543605	["Bcl6","Foxp3","Stat5a","Stat5b"]
GO:0098602	3	single organism cell adhesion	7	501	1.20519	0.000189074	0.000547346	["Foxp3","Gata3","Irf1","Irf4","Stat5a","Stat5b","Trp53"]
GO:0001654	5	eye development	4	119	0.286262	0.000193472	0.000558643	["Foxc1","Klf4","Rara","Rxra"]
GO:0031667	5	response to nutrient levels	7	505	1.21481	0.000198498	0.000571694	["Foxo1","Rara","Rxra","Srebf1","Stat5a","Trp53","Zeb1"]
GO:0002706	7	regulation of lymphocyte mediated immunity	4	120	0.288667	0.000199788	0.000572489	["Bcl6","Foxp3","Stat5a","Stat5b"]
GO:0032946	8	positive regulation of mononuclear cell proliferation	4	120	0.288667	0.000199788	0.000572489	["Bcl6","Foxp3","Stat5a","Stat5b"]
GO:0002363	7	alpha-beta T cell lineage commitment	2	9	0.02165	0.000202274	0.000576685	["Foxp3","Irf4"]
GO:0006600	5	creatine metabolic process	2	9	0.02165	0.000202274	0.000576685	["Stat5a","Stat5b"]
GO:0035295	4	tube development	5	225	0.541251	0.000205176	0.000582018	["Foxc1","Foxf2","Nr1h4","Rara","Rxra"]
GO:1901653	6	cellular response to peptide	5	225	0.541251	0.000205176	0.000582018	["Foxo1","Irf1","Klf4","Rxra","Srebf1"]
GO:0050777	6	negative regulation of immune response	4	122	0.293478	0.000212865	0.000602318	["Bcl6","Foxp3","Irf1","Nr1h3"]
GO:0045088	6	regulation of innate immune response	6	360	0.866001	0.000220238	0.000621621	["Irf1","Irf3","Irf7","Nr1h3","Stat5a","Stat5b"]
GO:0051250	7	negative regulation of lymphocyte activation	4	124	0.298289	0.000226548	0.000634864	["Bcl6","Foxp3","Irf1","Prdm1"]
GO:0070665	7	positive regulation of leukocyte proliferation	4	124	0.298289	0.000226548	0.000634864	["Bcl6","Foxp3","Stat5a","Stat5b"]
GO:0048646	3	anatomical structure formation involved in morphogenesis	9	879	2.11449	0.000226617	0.000634864	["Bcl6","Egr2","Foxc1","Gata3","Pou2f1","Rara","Rxra","Tbx5","Trp53"]
GO:0008284	6	positive regulation of cell proliferation	9	880	2.11689	0.000228538	0.000638662	["Bcl6","Foxg1","Foxp3","Pbx1","Rara","Rreb1","Stat5a","Stat5b","Tbx5"]
GO:0048511	2	rhythmic process	6	365	0.878029	0.000237194	0.000661215	["Egr2","Foxc1","Srebf1","Stat5a","Stat5b","Trp53"]
GO:0050896	2	response to stimulus	28	6393	15.3787	0.000246436	0.000685287	["Bcl6","Egr2","Foxo1","Foxo4","Foxp3","Gata3","Hnf4a","Irf1","Irf3","Irf4","Irf5","Irf7","Irf8","Irf9","Klf4","Mecom","Nr1h3","Nr1h4","Nr2f2","Pou5f1","Rara","Rxra","Sox30","Srebf1","Stat5a","Stat5b","Trp53","Zeb1"]
GO:0030097	5	hemopoiesis	4	127	0.305506	0.000248246	0.00068845	["Cbfb","Gata3","Klf4","Pbx1"]
GO:0002638	8	negative regulation of immunoglobulin production	2	10	0.0240556	0.000252452	0.00068845	["Bcl6","Foxp3"]
GO:0042532	9	negative regulation of tyrosine phosphorylation of STAT protein	2	10	0.0240556	0.000252452	0.00068845	["Hnf4a","Irf1"]
GO:0043369	7	CD4-positive or CD8-positive, alpha-beta T cell lineage commitment	2	10	0.0240556	0.000252452	0.00068845	["Foxp3","Irf4"]
GO:0045586	9	regulation of gamma-delta T cell differentiation	2	10	0.0240556	0.000252452	0.00068845	["Stat5a","Stat5b"]
GO:0048537	5	mucosal-associated lymphoid tissue development	2	10	0.0240556	0.000252452	0.00068845	["Stat5a","Stat5b"]
GO:0048541	6	Peyer's patch development	2	10	0.0240556	0.000252452	0.00068845	["Stat5a","Stat5b"]
GO:0060039	6	pericardium development	2	10	0.0240556	0.000252452	0.00068845	["Mecom","Tbx5"]
GO:0006950	3	response to stress	18	3149	7.57511	0.000260393	0.000708095	["Bcl6","Foxo1","Foxo4","Gata3","Irf1","Irf3","Irf4","Irf5","Irf7","Irf8","Irf9","Klf4","Mecom","Pou5f1","Rxra","Srebf1","Stat5b","Trp53"]
GO:0071216	4	cellular response to biotic stimulus	5	237	0.570118	0.00026091	0.000708095	["Irf3","Irf8","Nr1h3","Rara","Trp53"]
GO:0051896	7	regulation of protein kinase B signaling	4	129	0.310317	0.000263517	0.000713454	["Gata3","Klf4","Pou5f1","Rara"]
GO:0046631	6	alpha-beta T cell activation	3	52	0.125089	0.000267524	0.000722571	["Foxp3","Gata3","Irf1"]
GO:0009991	4	response to extracellular stimulus	7	531	1.27735	0.000269453	0.000726045	["Foxo1","Rara","Rxra","Srebf1","Stat5a","Trp53","Zeb1"]
GO:0001933	9	negative regulation of protein phosphorylation	6	374	0.899679	0.000270299	0.00072659	["Foxo1","Hnf4a","Irf1","Klf4","Mecom","Nr2f2"]
GO:0030856	6	regulation of epithelial cell differentiation	4	130	0.312723	0.0002714	0.000727817	["Gata3","Stat5a","Stat5b","Zeb1"]
GO:0002819	6	regulation of adaptive immune response	4	131	0.315128	0.000279452	0.000747633	["Bcl6","Foxp3","Irf1","Irf7"]
GO:0010563	7	negative regulation of phosphorus metabolic process	7	540	1.299	0.000298313	0.000794327	["Foxo1","Hnf4a","Irf1","Klf4","Mecom","Nr2f2","Trp53"]
GO:0045936	8	negative regulation of phosphate metabolic process	7	540	1.299	0.000298313	0.000794327	["Foxo1","Hnf4a","Irf1","Klf4","Mecom","Nr2f2","Trp53"]
GO:0002250	4	adaptive immune response	4	134	0.322345	0.000304637	0.000809258	["Bcl6","Foxp3","Gata3","Irf7"]
GO:0002829	7	negative regulation of type 2 immune response	2	11	0.0264612	0.000308077	0.000810766	["Bcl6","Irf1"]
GO:0006105	8	succinate metabolic process	2	11	0.0264612	0.000308077	0.000810766	["Stat5a","Stat5b"]
GO:0046643	8	regulation of gamma-delta T cell activation	2	11	0.0264612	0.000308077	0.000810766	["Stat5a","Stat5b"]
GO:0060742	4	epithelial cell differentiation involved in prostate gland development	2	11	0.0264612	0.000308077	0.000810766	["Rxra","Stat5a"]
GO:0031400	8	negative regulation of protein modification process	7	544	1.30862	0.000311914	0.000818955	["Foxo1","Foxp3","Hnf4a","Irf1","Klf4","Mecom","Nr2f2"]
GO:0031399	7	regulation of protein modification process	12	1592	3.82965	0.000325662	0.000852004	["Bcl6","Foxo1","Foxp3","Gata3","Hnf4a","Irf1","Klf4","Mecom","Nr2f2","Rara","Srebf1","Trp53"]
GO:0009887	4	organ morphogenesis	7	548	1.31825	0.00032601	0.000852004	["Foxc1","Foxf2","Lhx3","Pbx1","Rxra","Tbx15","Zeb1"]
GO:0051270	5	regulation of cellular component movement	8	730	1.75606	0.000333614	0.000869862	["Bcl6","Gata3","Klf4","Nr2f2","Rreb1","Stat5b","Tbx5","Trp53"]
GO:0042129	8	regulation of T cell proliferation	4	138	0.331967	0.000340699	0.000886287	["Foxp3","Irf1","Stat5a","Stat5b"]
GO:0043433	5	negative regulation of sequence-specific DNA binding transcription factor activity	4	139	0.334373	0.000350171	0.000903204	["Foxp3","Hnf4a","Klf4","Pbx1"]
GO:0002260	4	lymphocyte homeostasis	3	57	0.137117	0.000351202	0.000903204	["Foxp3","Stat5a","Stat5b"]
GO:0006909	4	phagocytosis	3	57	0.137117	0.000351202	0.000903204	["Irf8","Nr1h3","Rara"]
GO:0035051	6	cardiocyte differentiation	3	57	0.137117	0.000351202	0.000903204	["Rara","Rxra","Tbx5"]
GO:0035282	6	segmentation	3	57	0.137117	0.000351202	0.000903204	["Egr2","Foxc1","Trp53"]
GO:0006629	4	lipid metabolic process	10	1150	2.76639	0.0003651	0.00093593	["Hnf4a","Nr1h3","Nr1h4","Nr1i2","Nr2f2","Pbx1","Rxra","Srebf1","Stat5a","Stat5b"]
GO:0001945	4	lymph vessel development	2	12	0.0288667	0.000369122	0.00093593	["Foxc1","Nr2f2"]
GO:0006107	8	oxaloacetate metabolic process	2	12	0.0288667	0.000369122	0.00093593	["Stat5a","Stat5b"]
GO:0098586	5	cellular response to virus	2	12	0.0288667	0.000369122	0.00093593	["Irf3","Irf7"]
GO:2000188	5	regulation of cholesterol homeostasis	2	12	0.0288667	0.000369122	0.00093593	["Hnf4a","Nr1h3"]
GO:0022408	7	negative regulation of cell-cell adhesion	4	141	0.339184	0.000369681	0.00093593	["Bcl6","Foxp3","Irf1","Klf4"]
GO:0046635	9	positive regulation of alpha-beta T cell activation	3	58	0.139522	0.00036973	0.00093593	["Foxp3","Irf1","Rara"]
GO:0042326	9	negative regulation of phosphorylation	6	402	0.967035	0.000397107	0.00100298	["Foxo1","Hnf4a","Irf1","Klf4","Mecom","Nr2f2"]
GO:0032496	5	response to lipopolysaccharide	6	405	0.974252	0.000413062	0.00104095	["Irf3","Irf8","Nr1h3","Nr1h4","Rara","Stat5b"]
GO:0046890	6	regulation of lipid biosynthetic process	4	147	0.353617	0.000432877	0.00108794	["Hnf4a","Nr1h3","Nr1h4","Srebf1"]
GO:0001553	4	luteinization	2	13	0.0312723	0.000435562	0.00108794	["Stat5a","Stat5b"]
GO:0033240	7	positive regulation of cellular amine metabolic process	2	13	0.0312723	0.000435562	0.00108794	["Gata3","Nr1h4"]
GO:0045589	9	regulation of regulatory T cell differentiation	2	13	0.0312723	0.000435562	0.00108794	["Foxp3","Irf1"]
GO:0051223	6	regulation of protein transport	8	764	1.83785	0.000451807	0.00112216	["Foxp3","Gata3","Hnf4a","Irf3","Nr1h3","Pou5f1","Srebf1","Zic1"]
GO:0050708	7	regulation of protein secretion	6	412	0.991091	0.000452243	0.00112216	["Foxp3","Gata3","Hnf4a","Irf3","Nr1h3","Srebf1"]
GO:0071407	6	cellular response to organic cyclic compound	6	412	0.991091	0.000452243	0.00112216	["Egr2","Irf1","Irf3","Klf4","Nr1h4","Rara"]
GO:0032879	4	regulation of localization	15	2436	5.85994	0.000460752	0.00114076	["Bcl6","Foxp3","Gata3","Hnf4a","Irf3","Klf4","Nr1h3","Nr2f2","Pou5f1","Rreb1","Srebf1","Stat5b","Tbx5","Trp53","Zic1"]
GO:0001889	4	liver development	4	153	0.368051	0.000503439	0.00124372	["Pou2f1","Rara","Rxra","Stat5b"]
GO:0010867	8	positive regulation of triglyceride biosynthetic process	2	14	0.0336778	0.000507373	0.00125071	["Nr1h3","Srebf1"]
GO:2000107	9	negative regulation of leukocyte apoptotic process	3	65	0.156361	0.000517209	0.00127218	["Bcl6","Irf7","Stat5a"]
GO:0007417	5	central nervous system development	4	155	0.372862	0.000528677	0.00129756	["Nhlh1","Trp53","Zeb1","Zic1"]
GO:0008286	9	insulin receptor signaling pathway	4	158	0.380078	0.000568207	0.00139155	["Foxo1","Foxo4","Nr1h3","Srebf1"]
GO:0034097	5	response to cytokine	6	431	1.0368	0.00057337	0.00140116	["Gata3","Irf1","Pou5f1","Rara","Stat5a","Stat5b"]
GO:0001779	6	natural killer cell differentiation	2	15	0.0360834	0.000584527	0.00142227	["Stat5a","Stat5b"]
GO:0043277	5	apoptotic cell clearance	2	15	0.0360834	0.000584527	0.00142227	["Nr1h3","Rara"]
GO:0010632	5	regulation of epithelial cell migration	4	160	0.38489	0.0005957	0.00144633	["Gata3","Klf4","Nr2f2","Rreb1"]
GO:0002449	5	lymphocyte mediated immunity	3	69	0.165984	0.000616193	0.00149288	["Foxp3","Gata3","Irf7"]
GO:1903035	6	negative regulation of response to wounding	4	164	0.394512	0.000653502	0.00157988	["Foxp3","Gata3","Klf4","Nr1h3"]
GO:0032703	7	negative regulation of interleukin-2 production	2	16	0.038489	0.000667002	0.00160564	["Foxp3","Gata3"]
GO:0048596	7	embryonic camera-type eye morphogenesis	2	16	0.038489	0.000667002	0.00160564	["Foxf2","Zeb1"]
GO:0051960	6	regulation of nervous system development	8	812	1.95331	0.000674814	0.00162099	["Bcl6","Foxg1","Gata3","Pbx1","Rara","Rxra","Trp53","Zeb1"]
GO:0002703	6	regulation of leukocyte mediated immunity	4	167	0.401728	0.000699388	0.00167645	["Bcl6","Foxp3","Stat5a","Stat5b"]
GO:0051146	7	striated muscle cell differentiation	3	73	0.175606	0.000726526	0.00173781	["Rara","Rxra","Tbx5"]
GO:0009952	6	anterior/posterior pattern specification	4	170	0.408945	0.000747513	0.00178175	["Foxc1","Nr2f2","Pbx1","Trp53"]
GO:0002719	7	negative regulation of cytokine production involved in immune response	2	17	0.0408945	0.000754771	0.00178175	["Bcl6","Foxp3"]
GO:0033599	6	regulation of mammary gland epithelial cell proliferation	2	17	0.0408945	0.000754771	0.00178175	["Gata3","Rreb1"]
GO:0045722	8	positive regulation of gluconeogenesis	2	17	0.0408945	0.000754771	0.00178175	["Foxo1","Hnf4a"]
GO:0045910	8	negative regulation of DNA recombination	2	17	0.0408945	0.000754771	0.00178175	["Bcl6","Foxp3"]
GO:0060038	6	cardiac muscle cell proliferation	2	17	0.0408945	0.000754771	0.00178175	["Foxc1","Rxra"]
GO:0046889	7	positive regulation of lipid biosynthetic process	3	74	0.178011	0.000755941	0.00178175	["Hnf4a","Nr1h3","Srebf1"]
GO:1902531	6	regulation of intracellular signal transduction	11	1500	3.60834	0.000758694	0.00178451	["Bcl6","Foxo1","Gata3","Hnf4a","Irf1","Irf3","Klf4","Mecom","Pou5f1","Rara","Trp53"]
GO:0030308	6	negative regulation of cell growth	4	171	0.411351	0.000764062	0.00178968	["Bcl6","Foxk1","Hnf4a","Trp53"]
GO:2000027	6	regulation of organ morphogenesis	4	171	0.411351	0.000764062	0.00178968	["Foxc1","Gata3","Rxra","Tbx5"]
GO:0070201	6	regulation of establishment of protein localization	8	830	1.99661	0.000778532	0.0018198	["Foxp3","Gata3","Hnf4a","Irf3","Nr1h3","Pou5f1","Srebf1","Zic1"]
GO:0010721	7	negative regulation of cell development	5	304	0.73129	0.000809952	0.00188933	["Foxc1","Foxg1","Pbx1","Tbx5","Trp53"]
GO:0035019	5	somatic stem cell maintenance	3	76	0.182823	0.000817023	0.00189798	["Klf4","Pbx1","Pou5f1"]
GO:0048565	4	digestive tract development	3	76	0.182823	0.000817023	0.00189798	["Foxf2","Nr1h4","Rxra"]
GO:0098609	4	cell-cell adhesion	7	643	1.54677	0.000842866	0.001954	["Foxp3","Gata3","Irf1","Irf4","Stat5a","Stat5b","Trp53"]
GO:0007164	4	establishment of tissue polarity	2	18	0.0433001	0.000847809	0.00196143	["Foxf2","Hnf4a"]
GO:0006109	6	regulation of carbohydrate metabolic process	4	177	0.425784	0.00086885	0.002006	["Foxo1","Hnf4a","Nr1h4","Trp53"]
GO:0002764	6	immune response-regulating signaling pathway	6	474	1.14024	0.000940615	0.00215785	["Foxo1","Foxo4","Foxp3","Gata3","Irf3","Irf7"]
GO:0032268	6	regulation of cellular protein metabolic process	14	2327	5.59774	0.000945355	0.00215785	["Bcl6","Foxo1","Foxp3","Gata3","Hnf4a","Irf1","Klf4","Mecom","Nr1h3","Nr2f2","Rara","Rxra","Srebf1","Trp53"]
GO:0003281	5	ventricular septum development	2	19	0.0457056	0.000946091	0.00215785	["Gata3","Tbx5"]
GO:0010866	7	regulation of triglyceride biosynthetic process	2	19	0.0457056	0.000946091	0.00215785	["Nr1h3","Srebf1"]
GO:0014855	5	striated muscle cell proliferation	2	19	0.0457056	0.000946091	0.00215785	["Foxc1","Rxra"]
GO:0060707	5	trophoblast giant cell differentiation	2	19	0.0457056	0.000946091	0.00215785	["Nr2f2","Prdm1"]
GO:0016525	6	negative regulation of angiogenesis	3	80	0.192445	0.000948406	0.00215877	["Foxc1","Foxo4","Klf4"]
GO:0002708	8	positive regulation of lymphocyte mediated immunity	3	81	0.19485	0.000983215	0.00222902	["Foxp3","Stat5a","Stat5b"]
GO:0042102	9	positive regulation of T cell proliferation	3	81	0.19485	0.000983215	0.00222902	["Foxp3","Stat5a","Stat5b"]
GO:0042592	4	homeostatic process	10	1307	3.14407	0.000988996	0.00223763	["Foxc1","Foxo1","Foxp3","Gata3","Hnf4a","Mecom","Nr1h3","Stat5a","Stat5b","Trp53"]
GO:2000181	6	negative regulation of blood vessel morphogenesis	3	82	0.197256	0.00101882	0.00230051	["Foxc1","Foxo4","Klf4"]
GO:0006103	8	2-oxoglutarate metabolic process	2	20	0.0481112	0.00104959	0.00234652	["Stat5a","Stat5b"]
GO:0033033	9	negative regulation of myeloid cell apoptotic process	2	20	0.0481112	0.00104959	0.00234652	["Irf7","Stat5a"]
GO:0048384	7	retinoic acid receptor signaling pathway	2	20	0.0481112	0.00104959	0.00234652	["Rara","Rxra"]
GO:0060850	9	regulation of transcription involved in cell fate commitment	2	20	0.0481112	0.00104959	0.00234652	["Nr2f2","Pou5f1"]
GO:0071359	6	cellular response to dsRNA	2	20	0.0481112	0.00104959	0.00234652	["Irf1","Irf3"]
GO:1903531	6	negative regulation of secretion by cell	4	188	0.452245	0.00108667	0.0024246	["Foxp3","Nr1h3","Pou5f1","Srebf1"]
GO:0051897	8	positive regulation of protein kinase B signaling	3	84	0.202067	0.00109247	0.00243274	["Gata3","Pou5f1","Rara"]
GO:0097305	5	response to alcohol	6	490	1.17872	0.00111595	0.00248013	["Gata3","Nr2f2","Rara","Rxra","Stat5a","Stat5b"]
GO:0030099	6	myeloid cell differentiation	4	190	0.457056	0.00113003	0.00250649	["Cbfb","Gata3","Irf4","Irf8"]
GO:0032868	6	response to insulin	4	191	0.459462	0.00115216	0.00254914	["Egr2","Foxo1","Rxra","Srebf1"]
GO:0045624	7	positive regulation of T-helper cell differentiation	2	21	0.0505167	0.00115829	0.00254914	["Irf1","Rara"]
GO:0051150	7	regulation of smooth muscle cell differentiation	2	21	0.0505167	0.00115829	0.00254914	["Foxo4","Zeb1"]
GO:0060397	8	JAK-STAT cascade involved in growth hormone signaling pathway	2	21	0.0505167	0.00115829	0.00254914	["Stat5a","Stat5b"]
GO:0071300	6	cellular response to retinoic acid	3	86	0.206878	0.0011694	0.0025636	["Irf1","Klf4","Rara"]
GO:1901343	6	negative regulation of vasculature development	3	86	0.206878	0.0011694	0.0025636	["Foxc1","Foxo4","Klf4"]
GO:0045638	7	negative regulation of myeloid cell differentiation	3	87	0.209284	0.00120911	0.00264041	["Rara","Stat5a","Stat5b"]
GO:2000177	6	regulation of neural precursor cell proliferation	3	87	0.209284	0.00120911	0.00264041	["Foxg1","Foxo1","Trp53"]
GO:0002009	5	morphogenesis of an epithelium	5	336	0.808268	0.00126473	0.00275147	["Gata3","Klf4","Pbx1","Stat5a","Tbx5"]
GO:0045637	6	regulation of myeloid cell differentiation	4	196	0.47149	0.0012674	0.00275147	["Irf7","Rara","Stat5a","Stat5b"]
GO:0042104	10	positive regulation of activated T cell proliferation	2	22	0.0529223	0.00127216	0.00275147	["Stat5a","Stat5b"]
GO:0072001	5	renal system development	2	22	0.0529223	0.00127216	0.00275147	["Gata3","Mecom"]
GO:0090208	7	positive regulation of triglyceride metabolic process	2	22	0.0529223	0.00127216	0.00275147	["Nr1h3","Srebf1"]
GO:0048584	5	positive regulation of response to stimulus	12	1860	4.47434	0.00130282	0.0028124	["Foxp3","Gata3","Irf1","Irf3","Irf7","Nr1h3","Pou5f1","Rara","Rreb1","Stat5a","Stat5b","Trp53"]
GO:0090287	5	regulation of cellular response to growth factor stimulus	4	198	0.476301	0.00131567	0.00283472	["Gata3","Mecom","Trp53","Zeb1"]
GO:0002443	4	leukocyte mediated immunity	3	90	0.2165	0.00133333	0.00285101	["Foxp3","Gata3","Irf7"]
GO:0019217	7	regulation of fatty acid metabolic process	3	90	0.2165	0.00133333	0.00285101	["Hnf4a","Nr1h3","Srebf1"]
GO:0048863	6	stem cell differentiation	3	90	0.2165	0.00133333	0.00285101	["Foxc1","Foxo4","Pou5f1"]
GO:0050868	8	negative regulation of T cell activation	3	90	0.2165	0.00133333	0.00285101	["Bcl6","Foxp3","Irf1"]
GO:0051053	7	negative regulation of DNA metabolic process	3	91	0.218906	0.00137646	0.00293765	["Bcl6","Foxp3","Trp53"]
GO:0009081	5	branched-chain amino acid metabolic process	2	23	0.0553279	0.00139117	0.00295231	["Stat5a","Stat5b"]
GO:0033002	4	muscle cell proliferation	2	23	0.0553279	0.00139117	0.00295231	["Foxc1","Rxra"]
GO:2000826	7	regulation of heart morphogenesis	2	23	0.0553279	0.00139117	0.00295231	["Foxc1","Tbx5"]
GO:0065008	3	regulation of biological quality	16	3015	7.25276	0.00145945	0.0030914	["Egr2","Foxc1","Foxo1","Foxp3","Gata3","Hnf4a","Irf1","Irf2","Mecom","Nr1h3","Rara","Rxra","Srebf1","Stat5a","Stat5b","Trp53"]
GO:0001501	5	skeletal system development	4	205	0.49314	0.00149478	0.00316032	["Dmrt2","Foxc1","Pbx1","Zic1"]
GO:1903530	6	regulation of secretion by cell	7	711	1.71035	0.00150784	0.00317399	["Foxp3","Gata3","Hnf4a","Irf3","Nr1h3","Pou5f1","Srebf1"]
GO:0048514	4	blood vessel morphogenesis	3	94	0.226123	0.00151106	0.00317399	["Foxc1","Nr2f2","Prdm1"]
GO:0045954	7	positive regulation of natural killer cell mediated cytotoxicity	2	24	0.0577334	0.0015153	0.00317399	["Stat5a","Stat5b"]
GO:0046426	8	negative regulation of JAK-STAT cascade	2	24	0.0577334	0.0015153	0.00317399	["Hnf4a","Irf1"]
GO:1900117	8	regulation of execution phase of apoptosis	2	24	0.0577334	0.0015153	0.00317399	["Tbx5","Trp53"]
GO:0071375	6	cellular response to peptide hormone stimulus	4	206	0.495545	0.00152169	0.00318145	["Foxo1","Irf1","Rxra","Srebf1"]
GO:0050767	7	regulation of neurogenesis	7	715	1.71998	0.00155698	0.00324471	["Bcl6","Foxg1","Gata3","Pbx1","Rara","Trp53","Zeb1"]
GO:0051101	5	regulation of DNA binding	3	95	0.228528	0.00155769	0.00324471	["Gata3","Irf4","Zfp90"]
GO:0071222	6	cellular response to lipopolysaccharide	4	208	0.500356	0.00157651	0.00327786	["Irf3","Irf8","Nr1h3","Rara"]
GO:2000146	6	negative regulation of cell motility	4	209	0.502762	0.00160443	0.00332531	["Gata3","Klf4","Nr2f2","Tbx5"]
GO:1903038	8	negative regulation of leukocyte cell-cell adhesion	3	96	0.230934	0.00160522	0.00332531	["Bcl6","Foxp3","Irf1"]
GO:0002701	7	negative regulation of production of molecular mediator of immune response	2	25	0.060139	0.00164454	0.00335747	["Bcl6","Foxp3"]
GO:0002717	8	positive regulation of natural killer cell mediated immunity	2	25	0.060139	0.00164454	0.00335747	["Stat5a","Stat5b"]
GO:0003179	4	heart valve morphogenesis	2	25	0.060139	0.00164454	0.00335747	["Gata3","Tbx5"]
GO:0007622	3	rhythmic behavior	2	25	0.060139	0.00164454	0.00335747	["Egr2","Trp53"]
GO:0035162	5	embryonic hemopoiesis	2	25	0.060139	0.00164454	0.00335747	["Gata3","Pbx1"]
GO:0045191	6	regulation of isotype switching	2	25	0.060139	0.00164454	0.00335747	["Bcl6","Foxp3"]
GO:1901522	10	positive regulation of transcription from RNA polymerase II promoter involved in cellular response to chemical stimulus	2	25	0.060139	0.00164454	0.00335747	["Rxra","Trp53"]
GO:2000772	6	regulation of cellular senescence	2	25	0.060139	0.00164454	0.00335747	["Bcl6","Trp53"]
GO:0003279	4	cardiac septum development	2	26	0.0625445	0.00177884	0.00361857	["Gata3","Tbx5"]
GO:0043367	8	CD4-positive, alpha-beta T cell differentiation	2	26	0.0625445	0.00177884	0.00361857	["Foxp3","Gata3"]
GO:0002705	7	positive regulation of leukocyte mediated immunity	3	100	0.240556	0.0018044	0.00365084	["Foxp3","Stat5a","Stat5b"]
GO:0030326	6	embryonic limb morphogenesis	3	100	0.240556	0.0018044	0.00365084	["Mecom","Pbx1","Tbx5"]
GO:0035113	5	embryonic appendage morphogenesis	3	100	0.240556	0.0018044	0.00365084	["Mecom","Pbx1","Tbx5"]
GO:0051048	6	negative regulation of secretion	4	216	0.519601	0.0018096	0.00365482	["Foxp3","Nr1h3","Pou5f1","Srebf1"]
GO:0032880	5	regulation of protein localization	8	948	2.28047	0.00182152	0.00367232	["Foxp3","Gata3","Hnf4a","Irf3","Nr1h3","Pou5f1","Srebf1","Zic1"]
GO:0071219	5	cellular response to molecule of bacterial origin	4	217	0.522006	0.00184033	0.00370362	["Irf3","Irf8","Nr1h3","Rara"]
GO:0008283	3	cell proliferation	7	738	1.7753	0.00186442	0.00374543	["Foxc1","Irf2","Mecom","Prdm1","Rxra","Trp53","Zeb1"]
GO:0000060	5	protein import into nucleus, translocation	2	27	0.0649501	0.00191819	0.00382621	["Bcl6","Trp53"]
GO:0002262	3	myeloid cell homeostasis	2	27	0.0649501	0.00191819	0.00382621	["Foxp3","Mecom"]
GO:0002456	6	T cell mediated immunity	2	27	0.0649501	0.00191819	0.00382621	["Foxp3","Gata3"]
GO:0048048	6	embryonic eye morphogenesis	2	27	0.0649501	0.00191819	0.00382621	["Foxf2","Zeb1"]
GO:0051224	6	negative regulation of protein transport	4	221	0.531629	0.00196686	0.00391638	["Foxp3","Hnf4a","Nr1h3","Srebf1"]
GO:0034111	8	negative regulation of homotypic cell-cell adhesion	3	104	0.250178	0.00201838	0.00401189	["Bcl6","Foxp3","Irf1"]
GO:0090092	6	regulation of transmembrane receptor protein serine/threonine kinase signaling pathway	4	223	0.53644	0.00203234	0.00403253	["Mecom","Pou5f1","Trp53","Zeb1"]
GO:0002823	8	negative regulation of adaptive immune response based on somatic recombination of immune receptors built from immunoglobulin superfamily domains	2	28	0.0673557	0.00206257	0.00407817	["Bcl6","Foxp3"]
GO:0090181	8	regulation of cholesterol metabolic process	2	28	0.0673557	0.00206257	0.00407817	["Nr1h4","Srebf1"]
GO:0001959	6	regulation of cytokine-mediated signaling pathway	3	105	0.252584	0.00207423	0.00409407	["Irf3","Irf7","Nr1h3"]
GO:0051271	6	negative regulation of cellular component movement	4	225	0.541251	0.00209931	0.00413634	["Gata3","Klf4","Nr2f2","Tbx5"]
GO:0009791	4	post-embryonic development	3	107	0.257395	0.00218881	0.00429767	["Gata3","Mecom","Prdm1"]
GO:0010594	6	regulation of endothelial cell migration	3	107	0.257395	0.00218881	0.00429767	["Gata3","Klf4","Nr2f2"]
GO:0017015	7	regulation of transforming growth factor beta receptor signaling pathway	3	108	0.2598	0.00224754	0.0043977	["Mecom","Trp53","Zeb1"]
GO:1903844	6	regulation of cellular response to transforming growth factor beta stimulus	3	108	0.2598	0.00224754	0.0043977	["Mecom","Trp53","Zeb1"]
GO:0045087	4	innate immune response	7	764	1.83785	0.00226691	0.00442793	["Foxo1","Foxo4","Gata3","Irf1","Irf3","Irf5","Irf7"]
GO:0051046	6	regulation of secretion	7	767	1.84506	0.00231738	0.00451868	["Foxp3","Gata3","Hnf4a","Irf3","Nr1h3","Pou5f1","Srebf1"]
GO:0002832	6	negative regulation of response to biotic stimulus	2	30	0.0721668	0.00236629	0.0045235	["Irf3","Prdm1"]
GO:0008045	7	motor neuron axon guidance	2	30	0.0721668	0.00236629	0.0045235	["Egr2","Lhx3"]
GO:0019915	4	lipid storage	2	30	0.0721668	0.00236629	0.0045235	["Stat5a","Stat5b"]
GO:0033081	7	regulation of T cell differentiation in thymus	2	30	0.0721668	0.00236629	0.0045235	["Foxp3","Zeb1"]
GO:0035710	7	CD4-positive, alpha-beta T cell activation	2	30	0.0721668	0.00236629	0.0045235	["Foxp3","Gata3"]
GO:0042832	5	defense response to protozoan	2	30	0.0721668	0.00236629	0.0045235	["Irf4","Irf8"]
GO:0055090	7	acylglycerol homeostasis	2	30	0.0721668	0.00236629	0.0045235	["Hnf4a","Nr1h3"]
GO:0070328	8	triglyceride homeostasis	2	30	0.0721668	0.00236629	0.0045235	["Hnf4a","Nr1h3"]
GO:0097300	6	programmed necrotic cell death	2	30	0.0721668	0.00236629	0.0045235	["Irf3","Trp53"]
GO:2000398	6	regulation of thymocyte aggregation	2	30	0.0721668	0.00236629	0.0045235	["Foxp3","Zeb1"]
GO:0022602	3	ovulation cycle process	3	110	0.264612	0.00236793	0.0045235	["Foxc1","Stat5a","Stat5b"]
GO:0090288	6	negative regulation of cellular response to growth factor stimulus	3	110	0.264612	0.00236793	0.0045235	["Gata3","Mecom","Trp53"]
GO:0072091	6	regulation of stem cell proliferation	3	111	0.267017	0.00242959	0.00463346	["Foxg1","Trp53","Zeb1"]
GO:0007162	6	negative regulation of cell adhesion	4	235	0.565306	0.00245721	0.00467823	["Bcl6","Foxp3","Irf1","Klf4"]
GO:0050709	7	negative regulation of protein secretion	3	112	0.269423	0.00249224	0.00473694	["Foxp3","Nr1h3","Srebf1"]
GO:0001961	7	positive regulation of cytokine-mediated signaling pathway	2	31	0.0745723	0.0025256	0.00476026	["Irf3","Irf7"]
GO:0002820	7	negative regulation of adaptive immune response	2	31	0.0745723	0.0025256	0.00476026	["Bcl6","Foxp3"]
GO:0015721	5	bile acid and bile salt transport	2	31	0.0745723	0.0025256	0.00476026	["Nr1h4","Rxra"]
GO:0060706	4	cell differentiation involved in embryonic placenta development	2	31	0.0745723	0.0025256	0.00476026	["Nr2f2","Prdm1"]
GO:0070265	5	necrotic cell death	2	31	0.0745723	0.0025256	0.00476026	["Irf3","Trp53"]
GO:0045930	7	negative regulation of mitotic cell cycle	4	237	0.570118	0.00253352	0.00476724	["Foxc1","Foxo4","Hnf4a","Trp53"]
GO:0010906	7	regulation of glucose metabolic process	3	113	0.271828	0.00255589	0.0047854	["Foxo1","Hnf4a","Trp53"]
GO:0032869	7	cellular response to insulin stimulus	3	113	0.271828	0.00255589	0.0047854	["Foxo1","Rxra","Srebf1"]
GO:0045598	6	regulation of fat cell differentiation	3	113	0.271828	0.00255589	0.0047854	["Foxo1","Gata3","Mecom"]
GO:0032844	4	regulation of homeostatic process	5	397	0.955007	0.00262026	0.00489022	["Foxo1","Hnf4a","Nr1h3","Stat5a","Stat5b"]
GO:0001568	4	blood vessel development	3	114	0.274234	0.00262053	0.00489022	["Foxc1","Foxo1","Nr2f2"]
GO:0051272	6	positive regulation of cellular component movement	5	398	0.957413	0.00264881	0.00493482	["Bcl6","Gata3","Rreb1","Stat5b","Trp53"]
GO:0033032	8	regulation of myeloid cell apoptotic process	2	32	0.0769779	0.00268983	0.00498656	["Irf7","Stat5a"]
GO:0060760	6	positive regulation of response to cytokine stimulus	2	32	0.0769779	0.00268983	0.00498656	["Irf3","Irf7"]
GO:0090342	5	regulation of cell aging	2	32	0.0769779	0.00268983	0.00498656	["Bcl6","Trp53"]
GO:0045664	8	regulation of neuron differentiation	6	585	1.40725	0.0027293	0.00505145	["Bcl6","Foxg1","Gata3","Pbx1","Rara","Zeb1"]
GO:0045444	6	fat cell differentiation	3	117	0.28145	0.00282051	0.0052032	["Egr2","Foxo1","Klf4"]
GO:0048660	6	regulation of smooth muscle cell proliferation	3	117	0.28145	0.00282051	0.0052032	["Klf4","Stat5b","Trp53"]
GO:0035556	6	intracellular signal transduction	11	1768	4.25303	0.00284824	0.00524577	["Bcl6","Foxo1","Foxo4","Gata3","Irf1","Irf3","Irf7","Rreb1","Stat5a","Stat5b","Trp53"]
GO:0070670	6	response to interleukin-4	2	33	0.0793835	0.00285896	0.00525695	["Gata3","Stat5b"]
GO:0002761	7	regulation of myeloid leukocyte differentiation	3	118	0.283856	0.00288921	0.00530393	["Irf7","Rara","Stat5a"]
GO:0002822	7	regulation of adaptive immune response based on somatic recombination of immune receptors built from immunoglobulin superfamily domains	3	120	0.288667	0.00302967	0.00551407	["Bcl6","Foxp3","Irf1"]
GO:0001562	4	response to protozoan	2	34	0.081789	0.00303298	0.00551407	["Irf4","Irf8"]
GO:0002707	8	negative regulation of lymphocyte mediated immunity	2	34	0.081789	0.00303298	0.00551407	["Bcl6","Foxp3"]
GO:0002753	7	cytoplasmic pattern recognition receptor signaling pathway	2	34	0.081789	0.00303298	0.00551407	["Irf3","Irf7"]
GO:0006101	8	citrate metabolic process	2	34	0.081789	0.00303298	0.00551407	["Stat5a","Stat5b"]
GO:0035115	7	embryonic forelimb morphogenesis	2	34	0.081789	0.00303298	0.00551407	["Mecom","Tbx5"]
GO:0040013	5	negative regulation of locomotion	4	253	0.608607	0.00320366	0.00579263	["Gata3","Klf4","Nr2f2","Tbx5"]
GO:0010596	7	negative regulation of endothelial cell migration	2	35	0.0841946	0.00321186	0.00579263	["Klf4","Nr2f2"]
GO:0040019	6	positive regulation of embryonic development	2	35	0.0841946	0.00321186	0.00579263	["Dmrt2","Gata3"]
GO:0060338	7	regulation of type I interferon-mediated signaling pathway	2	35	0.0841946	0.00321186	0.00579263	["Irf3","Irf7"]
GO:1902692	7	regulation of neuroblast proliferation	2	35	0.0841946	0.00321186	0.00579263	["Foxg1","Trp53"]
GO:0035107	4	appendage morphogenesis	3	123	0.295884	0.00324814	0.00583941	["Mecom","Pbx1","Tbx5"]
GO:0035108	5	limb morphogenesis	3	123	0.295884	0.00324814	0.00583941	["Mecom","Pbx1","Tbx5"]
GO:0000902	5	cell morphogenesis	4	255	0.613418	0.00329513	0.00591448	["Bcl6","Foxf2","Foxg1","Gata3"]
GO:0033189	6	response to vitamin A	2	36	0.0866001	0.00339556	0.00606581	["Rara","Rxra"]
GO:0048736	4	appendage development	2	36	0.0866001	0.00339556	0.00606581	["Nr2f2","Rara"]
GO:0060173	5	limb development	2	36	0.0866001	0.00339556	0.00606581	["Nr2f2","Rara"]
GO:0001764	5	neuron migration	3	126	0.3031	0.00347605	0.00619001	["Foxg1","Gata3","Nr2f2"]
GO:0051099	5	positive regulation of binding	3	126	0.3031	0.00347605	0.00619001	["Gata3","Irf4","Rara"]
GO:0002715	7	regulation of natural killer cell mediated immunity	2	37	0.0890057	0.00358408	0.00634237	["Stat5a","Stat5b"]
GO:0042269	6	regulation of natural killer cell mediated cytotoxicity	2	37	0.0890057	0.00358408	0.00634237	["Stat5a","Stat5b"]
GO:0045646	5	regulation of erythrocyte differentiation	2	37	0.0890057	0.00358408	0.00634237	["Stat5a","Stat5b"]
GO:0051898	8	negative regulation of protein kinase B signaling	2	37	0.0890057	0.00358408	0.00634237	["Klf4","Pou5f1"]
GO:0050878	4	regulation of body fluid levels	6	620	1.49145	0.00363324	0.00640938	["Gata3","Hnf4a","Irf1","Irf2","Stat5a","Stat5b"]
GO:0009267	5	cellular response to starvation	3	128	0.307912	0.00363331	0.00640938	["Foxo1","Srebf1","Trp53"]
GO:0071363	6	cellular response to growth factor stimulus	4	263	0.632662	0.00367891	0.0064797	["Gata3","Klf4","Stat5b","Zeb1"]
GO:0040018	6	positive regulation of multicellular organism growth	2	38	0.0914113	0.00377739	0.00662216	["Stat5a","Stat5b"]
GO:0048662	7	negative regulation of smooth muscle cell proliferation	2	38	0.0914113	0.00377739	0.00662216	["Klf4","Trp53"]
GO:0090207	6	regulation of triglyceride metabolic process	2	38	0.0914113	0.00377739	0.00662216	["Nr1h3","Srebf1"]
GO:0045931	7	positive regulation of mitotic cell cycle	3	132	0.317534	0.00396072	0.0069157	["Pbx1","Stat5a","Stat5b"]
GO:0010470	6	regulation of gastrulation	2	39	0.0938168	0.00397546	0.0069157	["Hnf4a","Klf4"]
GO:0031641	5	regulation of myelination	2	39	0.0938168	0.00397546	0.0069157	["Rara","Rxra"]
GO:0044773	7	mitotic DNA damage checkpoint	2	39	0.0938168	0.00397546	0.0069157	["Foxo4","Trp53"]
GO:0072350	7	tricarboxylic acid metabolic process	2	39	0.0938168	0.00397546	0.0069157	["Stat5a","Stat5b"]
GO:0050707	6	regulation of cytokine secretion	3	133	0.319939	0.00404529	0.00702636	["Foxp3","Gata3","Irf3"]
GO:0045834	6	positive regulation of lipid metabolic process	3	134	0.322345	0.00413095	0.00715314	["Hnf4a","Nr1h3","Srebf1"]
GO:0051591	5	response to cAMP	3	134	0.322345	0.00413095	0.00715314	["Egr2","Hnf4a","Srebf1"]
GO:0030334	6	regulation of cell migration	6	638	1.53475	0.00417707	0.00719884	["Gata3","Klf4","Nr2f2","Rreb1","Tbx5","Trp53"]
GO:0002066	6	columnar/cuboidal epithelial cell development	2	40	0.0962224	0.00417827	0.00719884	["Prdm1","Rara"]
GO:0032653	6	regulation of interleukin-10 production	2	40	0.0962224	0.00417827	0.00719884	["Foxp3","Irf4"]
GO:0006954	5	inflammatory response	5	443	1.06566	0.00418285	0.00719884	["Bcl6","Gata3","Mecom","Rxra","Stat5b"]
GO:0006111	7	regulation of gluconeogenesis	2	41	0.0986279	0.0043858	0.0074797	["Foxo1","Hnf4a"]
GO:0008206	5	bile acid metabolic process	2	41	0.0986279	0.0043858	0.0074797	["Nr1h4","Rxra"]
GO:0031018	4	endocrine pancreas development	2	41	0.0986279	0.0043858	0.0074797	["Foxo1","Hnf4a"]
GO:0032720	8	negative regulation of tumor necrosis factor production	2	41	0.0986279	0.0043858	0.0074797	["Foxp3","Rara"]
GO:0043388	6	positive regulation of DNA binding	2	41	0.0986279	0.0043858	0.0074797	["Gata3","Irf4"]
GO:0060761	6	negative regulation of response to cytokine stimulus	2	41	0.0986279	0.0043858	0.0074797	["Klf4","Nr1h3"]
GO:0048562	5	embryonic organ morphogenesis	3	139	0.334373	0.00457584	0.00779205	["Foxf2","Tbx15","Zeb1"]
GO:0010907	8	positive regulation of glucose metabolic process	2	42	0.101033	0.00459802	0.00779454	["Foxo1","Hnf4a"]
GO:0032873	8	negative regulation of stress-activated MAPK cascade	2	42	0.101033	0.00459802	0.00779454	["Foxo1","Mecom"]
GO:0070303	7	negative regulation of stress-activated protein kinase signaling cascade	2	42	0.101033	0.00459802	0.00779454	["Foxo1","Mecom"]
GO:0048015	8	phosphatidylinositol-mediated signaling	3	140	0.336778	0.00466817	0.00790159	["Foxo1","Foxo4","Gata3"]
GO:0051098	4	regulation of binding	4	282	0.678368	0.00470994	0.00796036	["Gata3","Irf4","Rara","Zfp90"]
GO:0035136	6	forelimb morphogenesis	2	43	0.103439	0.00481491	0.00811349	["Mecom","Tbx5"]
GO:1903556	7	negative regulation of tumor necrosis factor superfamily cytokine production	2	43	0.103439	0.00481491	0.00811349	["Foxp3","Rara"]
GO:0030324	4	lung development	3	142	0.341589	0.00485618	0.00817084	["Lhx3","Srebf1","Tbx5"]
GO:0048017	7	inositol lipid-mediated signaling	3	143	0.343995	0.00495189	0.00831947	["Foxo1","Foxo4","Gata3"]
GO:0043551	8	regulation of phosphatidylinositol 3-kinase activity	2	44	0.105845	0.00503645	0.00844897	["Klf4","Rara"]
GO:0045089	7	positive regulation of innate immune response	4	289	0.695207	0.00513427	0.00860028	["Irf3","Irf7","Stat5a","Stat5b"]
GO:0007050	5	cell cycle arrest	3	146	0.351212	0.00524583	0.00876328	["Foxo4","Irf1","Trp53"]
GO:0002704	7	negative regulation of leukocyte mediated immunity	2	45	0.10825	0.00526262	0.00876328	["Bcl6","Foxp3"]
GO:0044774	7	mitotic DNA integrity checkpoint	2	45	0.10825	0.00526262	0.00876328	["Foxo4","Trp53"]
GO:0055010	7	ventricular cardiac muscle tissue morphogenesis	2	45	0.10825	0.00526262	0.00876328	["Foxc1","Rxra"]
GO:0007167	7	enzyme linked receptor protein signaling pathway	7	894	2.15057	0.00538204	0.00894554	["Foxc1","Foxo1","Foxo4","Nr1h3","Pou5f1","Srebf1","Trp53"]
GO:1903533	8	regulation of protein targeting	4	293	0.704829	0.00538792	0.00894554	["Hnf4a","Pou5f1","Srebf1","Zic1"]
GO:2000145	5	regulation of cell motility	6	675	1.62375	0.00548226	0.00905408	["Gata3","Klf4","Nr2f2","Rreb1","Tbx5","Trp53"]
GO:0001657	5	ureteric bud development	2	46	0.110656	0.0054934	0.00905408	["Foxc1","Rara"]
GO:0001912	6	positive regulation of leukocyte mediated cytotoxicity	2	46	0.110656	0.0054934	0.00905408	["Stat5a","Stat5b"]
GO:0002889	9	regulation of immunoglobulin mediated immune response	2	46	0.110656	0.0054934	0.00905408	["Bcl6","Foxp3"]
GO:0050732	10	negative regulation of peptidyl-tyrosine phosphorylation	2	46	0.110656	0.0054934	0.00905408	["Hnf4a","Irf1"]
GO:0007420	4	brain development	4	295	0.70964	0.00551785	0.00906032	["Egr2","Foxc1","Foxg1","Zic1"]
GO:0071496	4	cellular response to external stimulus	4	295	0.70964	0.00551785	0.00906032	["Foxo1","Irf1","Srebf1","Trp53"]
GO:0010942	6	positive regulation of cell death	6	676	1.62616	0.00552126	0.00906032	["Bcl6","Foxo1","Irf1","Irf5","Rxra","Trp53"]
GO:0002712	8	regulation of B cell mediated immunity	2	47	0.113061	0.00572875	0.00936	["Bcl6","Foxp3"]
GO:0007259	7	JAK-STAT cascade	2	47	0.113061	0.00572875	0.00936	["Stat5a","Stat5b"]
GO:0045599	7	negative regulation of fat cell differentiation	2	47	0.113061	0.00572875	0.00936	["Foxo1","Gata3"]
GO:0043409	8	negative regulation of MAPK cascade	3	151	0.363239	0.00575872	0.00939537	["Foxo1","Klf4","Mecom"]
GO:0042692	6	muscle cell differentiation	3	152	0.365645	0.00586478	0.0095546	["Rara","Rxra","Tbx5"]
GO:0006974	5	cellular response to DNA damage stimulus	6	685	1.64781	0.00588147	0.00956798	["Bcl6","Foxo1","Foxo4","Irf3","Irf7","Trp53"]
GO:0043901	5	negative regulation of multi-organism process	3	154	0.370456	0.00608041	0.00987738	["Irf3","Irf8","Prdm1"]
GO:0048638	5	regulation of developmental growth	4	304	0.73129	0.00612854	0.009927	["Foxc1","Stat5a","Stat5b","Tbx5"]
GO:0070848	5	response to growth factor	4	304	0.73129	0.00612854	0.009927	["Gata3","Klf4","Stat5b","Zeb1"]
GO:1903036	6	positive regulation of response to wounding	3	155	0.372862	0.00618998	0.0099923	["Rreb1","Stat5a","Stat5b"]
GO:0010633	6	negative regulation of epithelial cell migration	2	49	0.117872	0.00621311	0.0099923	["Klf4","Nr2f2"]
GO:0048538	5	thymus development	2	49	0.117872	0.00621311	0.0099923	["Gata3","Pbx1"]
GO:0048706	6	embryonic skeletal system development	2	49	0.117872	0.00621311	0.0099923	["Dmrt2","Pbx1"]
GO:2000738	7	positive regulation of stem cell differentiation	2	49	0.117872	0.00621311	0.0099923	["Foxc1","Tbx5"]
GO:0051052	6	regulation of DNA metabolic process	4	307	0.738507	0.00634172	0.0101846	["Bcl6","Foxp3","Klf4","Trp53"]
GO:2000278	7	regulation of DNA biosynthetic process	2	50	0.120278	0.00646207	0.0103632	["Klf4","Trp53"]
GO:0002718	6	regulation of cytokine production involved in immune response	2	51	0.122684	0.00671552	0.0107391	["Bcl6","Foxp3"]
GO:0048844	5	artery morphogenesis	2	51	0.122684	0.00671552	0.0107391	["Foxc1","Prdm1"]
GO:2000377	6	regulation of reactive oxygen species metabolic process	3	161	0.387295	0.00687228	0.0109743	["Foxo1","Klf4","Trp53"]
GO:0001756	4	somitogenesis	2	52	0.125089	0.00697344	0.0110731	["Foxc1","Trp53"]
GO:0001890	4	placenta development	2	52	0.125089	0.00697344	0.0110731	["Lhx3","Rxra"]
GO:0031343	5	positive regulation of cell killing	2	52	0.125089	0.00697344	0.0110731	["Stat5a","Stat5b"]
GO:0043550	7	regulation of lipid kinase activity	2	52	0.125089	0.00697344	0.0110731	["Klf4","Rara"]
GO:0051051	5	negative regulation of transport	5	503	1.21	0.00710355	0.0112639	["Foxp3","Hnf4a","Nr1h3","Pou5f1","Srebf1"]
GO:0010389	8	regulation of G2/M transition of mitotic cell cycle	2	53	0.127495	0.0072358	0.0114415	["Foxo4","Pbx1"]
GO:0072164	5	mesonephric tubule development	2	53	0.127495	0.0072358	0.0114415	["Foxc1","Rara"]
GO:0048639	6	positive regulation of developmental growth	3	165	0.396917	0.00735106	0.0116075	["Stat5a","Stat5b","Tbx5"]
GO:0072163	7	mesonephric epithelium development	2	54	0.1299	0.00750259	0.0118302	["Foxc1","Rara"]
GO:0010675	6	regulation of cellular carbohydrate metabolic process	3	167	0.401728	0.00759769	0.0119468	["Foxo1","Hnf4a","Trp53"]
GO:0046683	5	response to organophosphorus	3	167	0.401728	0.00759769	0.0119468	["Egr2","Hnf4a","Srebf1"]
GO:0051128	4	regulation of cellular component organization	12	2307	5.54963	0.0076716	0.0120462	["Bcl6","Foxk1","Foxp3","Gata3","Hnf4a","Irf8","Nr1h3","Pou5f1","Rreb1","Srebf1","Tbx5","Trp53"]
GO:1902749	8	regulation of cell cycle G2/M phase transition	2	55	0.132306	0.00777379	0.0121897	["Foxo4","Pbx1"]
GO:0043627	6	response to estrogen	4	328	0.789024	0.00797353	0.0124733	["Gata3","Nr2f2","Rara","Stat5b"]
GO:0031669	5	cellular response to nutrient levels	3	170	0.408945	0.00797675	0.0124733	["Foxo1","Srebf1","Trp53"]
GO:0002637	7	regulation of immunoglobulin production	2	56	0.134711	0.00804936	0.0125348	["Bcl6","Foxp3"]
GO:0048592	5	eye morphogenesis	2	56	0.134711	0.00804936	0.0125348	["Foxf2","Zeb1"]
GO:0060411	4	cardiac septum morphogenesis	2	56	0.134711	0.00804936	0.0125348	["Rara","Tbx5"]
GO:0042306	8	regulation of protein import into nucleus	3	172	0.413756	0.00823557	0.0128071	["Hnf4a","Pou5f1","Zic1"]
GO:0007595	5	lactation	2	57	0.137117	0.00832929	0.0129173	["Stat5a","Stat5b"]
GO:0032570	6	response to progesterone	2	57	0.137117	0.00832929	0.0129173	["Nr1h3","Srebf1"]
GO:0042594	4	response to starvation	3	173	0.416162	0.00836683	0.0129577	["Foxo1","Srebf1","Trp53"]
GO:0048589	3	developmental growth	4	335	0.805862	0.00857348	0.0132595	["Gata3","Pou5f1","Rara","Trp53"]
GO:0055008	6	cardiac muscle tissue morphogenesis	2	58	0.139522	0.00861356	0.013267	["Foxc1","Rxra"]
GO:0060348	4	bone development	2	58	0.139522	0.00861356	0.013267	["Bbx","Rara"]
GO:0060485	5	mesenchyme development	2	58	0.139522	0.00861356	0.013267	["Rxra","Tbx5"]
GO:0040012	4	regulation of locomotion	6	746	1.79455	0.00879369	0.0135127	["Gata3","Klf4","Nr2f2","Rreb1","Tbx5","Trp53"]
GO:0010720	7	positive regulation of cell development	5	530	1.27495	0.00879702	0.0135127	["Bcl6","Foxg1","Rara","Rreb1","Zeb1"]
GO:0007568	4	aging	4	340	0.81789	0.0090197	0.0138359	["Foxg1","Rxra","Srebf1","Trp53"]
GO:0000018	7	regulation of DNA recombination	2	60	0.144334	0.00919503	0.0140667	["Bcl6","Foxp3"]
GO:0010332	6	response to gamma radiation	2	60	0.144334	0.00919503	0.0140667	["Gata3","Trp53"]
GO:0016477	4	cell migration	6	754	1.81379	0.00924095	0.0141178	["Foxc1","Foxg1","Gata3","Nr2f2","Stat5b","Tbx5"]
GO:0045666	7	positive regulation of neuron differentiation	4	343	0.825107	0.00929461	0.0141806	["Bcl6","Foxg1","Rara","Zeb1"]
GO:0032787	7	monocarboxylic acid metabolic process	5	542	1.30381	0.00963282	0.0146767	["Nr1h3","Nr1h4","Rxra","Stat5a","Stat5b"]
GO:0009749	8	response to glucose	3	183	0.440217	0.00974747	0.0148314	["Hnf4a","Nr1h4","Srebf1"]
GO:0000904	6	cell morphogenesis involved in differentiation	3	184	0.442623	0.0098924	0.0150316	["Foxf2","Foxg1","Gata3"]
GO:0001910	5	regulation of leukocyte mediated cytotoxicity	2	63	0.15155	0.0100992	0.0152842	["Stat5a","Stat5b"]
GO:0003007	5	heart morphogenesis	2	63	0.15155	0.0100992	0.0152842	["Foxc1","Rxra"]
GO:0030888	8	regulation of B cell proliferation	2	63	0.15155	0.0100992	0.0152842	["Bcl6","Prdm1"]
GO:0001708	5	cell fate specification	2	64	0.153956	0.0104091	0.015732	["Lhx3","Pou5f1"]
GO:0006521	6	regulation of cellular amino acid metabolic process	2	65	0.156361	0.0107231	0.0161634	["Gata3","Nr1h4"]
GO:0042509	8	regulation of tyrosine phosphorylation of STAT protein	2	65	0.156361	0.0107231	0.0161634	["Hnf4a","Irf1"]
GO:0009746	7	response to hexose	3	190	0.457056	0.0107884	0.0162402	["Hnf4a","Nr1h4","Srebf1"]
GO:0001932	8	regulation of protein phosphorylation	8	1279	3.07671	0.0109349	0.0164388	["Foxo1","Hnf4a","Irf1","Klf4","Mecom","Nr2f2","Rara","Trp53"]
GO:0032088	6	negative regulation of NF-kappaB transcription factor activity	2	66	0.158767	0.0110413	0.0165326	["Foxp3","Klf4"]
GO:0090596	4	sensory organ morphogenesis	2	66	0.158767	0.0110413	0.0165326	["Foxf2","Zeb1"]
GO:1903725	7	regulation of phospholipid metabolic process	2	66	0.158767	0.0110413	0.0165326	["Klf4","Rara"]
GO:1900180	7	regulation of protein localization to nucleus	3	194	0.466679	0.0114111	0.0170638	["Hnf4a","Pou5f1","Zic1"]
GO:0033554	4	cellular response to stress	9	1559	3.75027	0.0114293	0.0170684	["Bcl6","Foxo1","Foxo4","Irf3","Irf7","Klf4","Rxra","Srebf1","Trp53"]
GO:0033157	7	regulation of intracellular protein transport	4	366	0.880435	0.0115856	0.017279	["Hnf4a","Pou5f1","Srebf1","Zic1"]
GO:0060341	5	regulation of cellular localization	8	1293	3.11039	0.0116281	0.0173195	["Foxp3","Gata3","Hnf4a","Irf3","Nr1h3","Pou5f1","Srebf1","Zic1"]
GO:0002286	6	T cell activation involved in immune response	2	68	0.163578	0.0116901	0.0173203	["Gata3","Trp53"]
GO:0030101	5	natural killer cell activation	2	68	0.163578	0.0116901	0.0173203	["Stat5a","Stat5b"]
GO:0032945	8	negative regulation of mononuclear cell proliferation	2	68	0.163578	0.0116901	0.0173203	["Foxp3","Prdm1"]
GO:0050672	8	negative regulation of lymphocyte proliferation	2	68	0.163578	0.0116901	0.0173203	["Foxp3","Prdm1"]
GO:0014074	5	response to purine-containing compound	3	196	0.47149	0.0117302	0.0173569	["Egr2","Hnf4a","Srebf1"]
GO:0002768	7	immune response-regulating cell surface receptor signaling pathway	4	371	0.892463	0.0121277	0.0178982	["Foxo1","Foxo4","Foxp3","Gata3"]
GO:0051090	4	regulation of sequence-specific DNA binding transcription factor activity	4	371	0.892463	0.0121277	0.0178982	["Foxp3","Hnf4a","Klf4","Pbx1"]
GO:0043331	5	response to dsRNA	2	70	0.168389	0.0123553	0.0181629	["Irf1","Irf3"]
GO:0050810	7	regulation of steroid biosynthetic process	2	70	0.168389	0.0123553	0.0181629	["Nr1h4","Srebf1"]
GO:0060415	5	muscle tissue morphogenesis	2	70	0.168389	0.0123553	0.0181629	["Foxc1","Rxra"]
GO:0031668	4	cellular response to extracellular stimulus	3	200	0.481112	0.0123836	0.0181808	["Foxo1","Srebf1","Trp53"]
GO:0007155	3	cell adhesion	7	1049	2.52343	0.0124356	0.0182335	["Foxp3","Gata3","Irf1","Irf4","Stat5a","Stat5b","Trp53"]
GO:0030336	7	negative regulation of cell migration	3	201	0.483517	0.0125501	0.0183775	["Klf4","Nr2f2","Tbx5"]
GO:0006446	8	regulation of translational initiation	2	71	0.170795	0.012694	0.0185162	["Rara","Rxra"]
GO:0010676	7	positive regulation of cellular carbohydrate metabolic process	2	71	0.170795	0.012694	0.0185162	["Foxo1","Hnf4a"]
GO:0072073	6	kidney epithelium development	2	71	0.170795	0.012694	0.0185162	["Foxc1","Rara"]
GO:0030518	7	intracellular steroid hormone receptor signaling pathway	2	72	0.1732	0.0130367	0.0189427	["Nr1i3","Rara"]
GO:0048839	4	inner ear development	2	72	0.1732	0.0130367	0.0189427	["Gata3","Lhx3"]
GO:0070664	7	negative regulation of leukocyte proliferation	2	72	0.1732	0.0130367	0.0189427	["Foxp3","Prdm1"]
GO:0002757	4	immune response-activating signal transduction	4	380	0.914113	0.013144	0.019074	["Foxp3","Gata3","Irf3","Irf7"]
GO:0022610	2	biological adhesion	7	1061	2.5523	0.0131753	0.0190948	["Foxp3","Gata3","Irf1","Irf4","Stat5a","Stat5b","Trp53"]
GO:0034284	6	response to monosaccharide	3	205	0.49314	0.0132293	0.0191485	["Hnf4a","Nr1h4","Srebf1"]
GO:0031341	4	regulation of cell killing	2	74	0.178011	0.0137343	0.019854	["Stat5a","Stat5b"]
GO:0030512	8	negative regulation of transforming growth factor beta receptor signaling pathway	2	75	0.180417	0.014089	0.0202636	["Mecom","Trp53"]
GO:0070228	9	regulation of lymphocyte apoptotic process	2	75	0.180417	0.014089	0.0202636	["Bcl6","Trp53"]
GO:1903845	7	negative regulation of cellular response to transforming growth factor beta stimulus	2	75	0.180417	0.014089	0.0202636	["Mecom","Trp53"]
GO:0031349	6	positive regulation of defense response	4	388	0.933357	0.014092	0.0202636	["Irf3","Irf7","Stat5a","Stat5b"]
GO:0032355	6	response to estradiol	3	210	0.505167	0.0141073	0.0202636	["Nr2f2","Rara","Stat5b"]
GO:0009953	6	dorsal/ventral pattern formation	2	77	0.185228	0.0148104	0.0212194	["Foxg1","Lhx3"]
GO:0035666	9	TRIF-dependent toll-like receptor signaling pathway	2	77	0.185228	0.0148104	0.0212194	["Irf3","Irf7"]
GO:0048870	3	cell motility	6	839	2.01826	0.0150523	0.0215388	["Foxc1","Foxg1","Gata3","Nr2f2","Stat5b","Tbx5"]
GO:0032270	7	positive regulation of cellular protein metabolic process	8	1355	3.25953	0.015098	0.0215768	["Bcl6","Foxp3","Klf4","Nr1h3","Rara","Rxra","Srebf1","Trp53"]
GO:0042325	8	regulation of phosphorylation	8	1356	3.26194	0.0151596	0.0216374	["Foxo1","Hnf4a","Irf1","Klf4","Mecom","Nr2f2","Rara","Trp53"]
GO:0046822	8	regulation of nucleocytoplasmic transport	3	216	0.519601	0.0152039	0.0216733	["Hnf4a","Pou5f1","Zic1"]
GO:0014066	7	regulation of phosphatidylinositol 3-kinase signaling	2	79	0.190039	0.0155474	0.0221349	["Klf4","Rara"]
GO:0000077	6	DNA damage checkpoint	2	80	0.192445	0.0159217	0.0225541	["Foxo4","Trp53"]
GO:0001816	4	cytokine production	2	80	0.192445	0.0159217	0.0225541	["Foxp3","Irf7"]
GO:0002756	8	MyD88-independent toll-like receptor signaling pathway	2	80	0.192445	0.0159217	0.0225541	["Irf3","Irf7"]
GO:0032941	4	secretion by tissue	2	80	0.192445	0.0159217	0.0225541	["Stat5a","Stat5b"]
GO:0040014	5	regulation of multicellular organism growth	2	81	0.19485	0.0162999	0.023032	["Stat5a","Stat5b"]
GO:0045913	6	positive regulation of carbohydrate metabolic process	2	81	0.19485	0.0162999	0.023032	["Foxo1","Hnf4a"]
GO:0002824	8	positive regulation of adaptive immune response based on somatic recombination of immune receptors built from immunoglobulin superfamily domains	2	83	0.199661	0.0170678	0.0240568	["Foxp3","Irf1"]
GO:0034138	8	toll-like receptor 3 signaling pathway	2	83	0.199661	0.0170678	0.0240568	["Irf3","Irf7"]
GO:0050730	9	regulation of peptidyl-tyrosine phosphorylation	3	227	0.546062	0.0173368	0.0244056	["Hnf4a","Irf1","Trp53"]
GO:0006928	4	movement of cell or subcellular component	8	1390	3.34373	0.0173647	0.0244144	["Egr2","Foxc1","Foxg1","Gata3","Lhx3","Nr2f2","Stat5b","Tbx5"]
GO:0002526	6	acute inflammatory response	2	84	0.202067	0.0174574	0.0245142	["Gata3","Stat5b"]
GO:0045765	6	regulation of angiogenesis	3	229	0.550873	0.0177417	0.0248619	["Foxc1","Foxo4","Klf4"]
GO:0001558	5	regulation of cell growth	4	416	1.00071	0.0177491	0.0248619	["Bcl6","Foxk1","Hnf4a","Trp53"]
GO:0043065	8	positive regulation of apoptotic process	5	634	1.52512	0.0179293	0.0250832	["Bcl6","Foxo1","Irf5","Rxra","Trp53"]
GO:0043068	7	positive regulation of programmed cell death	5	640	1.53956	0.0185954	0.0259829	["Bcl6","Foxo1","Irf5","Rxra","Trp53"]
GO:0071356	7	cellular response to tumor necrosis factor	2	88	0.211689	0.0190535	0.0265902	["Gata3","Irf1"]
GO:0009743	5	response to carbohydrate	3	236	0.567712	0.0192005	0.0267621	["Hnf4a","Nr1h4","Srebf1"]
GO:0002821	7	positive regulation of adaptive immune response	2	89	0.214095	0.0194619	0.0270597	["Foxp3","Irf1"]
GO:0050715	7	positive regulation of cytokine secretion	2	89	0.214095	0.0194619	0.0270597	["Gata3","Irf3"]
GO:0002253	3	activation of immune response	4	429	1.03199	0.0196311	0.027228	["Foxp3","Gata3","Irf3","Irf7"]
GO:0040007	2	growth	4	429	1.03199	0.0196311	0.027228	["Gata3","Pou5f1","Rara","Trp53"]
GO:0031570	6	DNA integrity checkpoint	2	90	0.2165	0.0198739	0.0274971	["Foxo4","Trp53"]
GO:0050852	7	T cell receptor signaling pathway	2	90	0.2165	0.0198739	0.0274971	["Foxp3","Gata3"]
GO:0019752	6	carboxylic acid metabolic process	6	894	2.15057	0.0199536	0.0275736	["Hnf4a","Nr1h3","Nr1h4","Rxra","Stat5a","Stat5b"]
GO:0050769	7	positive regulation of neurogenesis	4	432	1.0392	0.0200824	0.0277176	["Bcl6","Foxg1","Rara","Zeb1"]
GO:0033238	6	regulation of cellular amine metabolic process	2	91	0.218906	0.0202896	0.0279694	["Gata3","Nr1h4"]
GO:0046620	5	regulation of organ growth	2	92	0.221311	0.0207089	0.0285126	["Foxc1","Tbx5"]
GO:0050768	7	negative regulation of neurogenesis	3	244	0.586957	0.020947	0.0288053	["Foxg1","Pbx1","Trp53"]
GO:0007589	5	body fluid secretion	2	93	0.223717	0.0211318	0.0289537	["Stat5a","Stat5b"]
GO:0048704	6	embryonic skeletal system morphogenesis	2	93	0.223717	0.0211318	0.0289537	["Tbx15","Zeb1"]
GO:2000379	7	positive regulation of reactive oxygen species metabolic process	2	93	0.223717	0.0211318	0.0289537	["Klf4","Trp53"]
GO:0043255	6	regulation of carbohydrate biosynthetic process	2	94	0.226123	0.0215583	0.0294666	["Foxo1","Hnf4a"]
GO:0060070	8	canonical Wnt signaling pathway	2	94	0.226123	0.0215583	0.0294666	["Gata3","Klf4"]
GO:1901342	6	regulation of vasculature development	3	247	0.594173	0.0216238	0.0294971	["Foxc1","Foxo4","Klf4"]
GO:0051222	6	positive regulation of protein transport	4	442	1.06326	0.0216329	0.0294971	["Gata3","Irf3","Pou5f1","Zic1"]
GO:0048771	4	tissue remodeling	2	95	0.228528	0.0219885	0.0299457	["Foxc1","Stat5a"]
GO:0007507	4	heart development	3	249	0.598984	0.0220816	0.0300364	["Foxc1","Rxra","Tbx5"]
GO:0007169	8	transmembrane receptor protein tyrosine kinase signaling pathway	5	670	1.61172	0.0221728	0.030124	["Foxc1","Foxo1","Foxo4","Nr1h3","Srebf1"]
GO:0042307	7	positive regulation of protein import into nucleus	2	96	0.230934	0.0224222	0.0304262	["Pou5f1","Zic1"]
GO:0002700	6	regulation of production of molecular mediator of immune response	2	97	0.233339	0.0228594	0.0309823	["Bcl6","Foxp3"]
GO:1903649	7	regulation of cytoplasmic transport	4	450	1.0825	0.0229251	0.0310341	["Hnf4a","Pou5f1","Srebf1","Zic1"]
GO:0071345	6	cellular response to cytokine stimulus	3	253	0.608607	0.0230133	0.0311161	["Gata3","Irf1","Stat5a"]
GO:0051216	5	cartilage development	2	98	0.235745	0.0233001	0.0314663	["Rara","Zeb1"]
GO:0007283	6	spermatogenesis	4	454	1.09212	0.0235886	0.0318179	["Bcl6","Rara","Sox30","Zfp39"]
GO:0010634	6	positive regulation of epithelial cell migration	2	99	0.23815	0.0237444	0.0318538	["Gata3","Rreb1"]
GO:0046425	7	regulation of JAK-STAT cascade	2	99	0.23815	0.0237444	0.0318538	["Hnf4a","Irf1"]
GO:0007596	5	blood coagulation	4	455	1.09453	0.0237563	0.0318538	["Gata3","Hnf4a","Irf1","Irf2"]
GO:0048232	5	male gamete generation	4	455	1.09453	0.0237563	0.0318538	["Bcl6","Rara","Sox30","Zfp39"]
GO:0050817	4	coagulation	4	455	1.09453	0.0237563	0.0318538	["Gata3","Hnf4a","Irf1","Irf2"]
GO:1901605	5	alpha-amino acid metabolic process	3	257	0.618229	0.0239661	0.032097	["Hnf4a","Stat5a","Stat5b"]
GO:0034142	8	toll-like receptor 4 signaling pathway	2	100	0.240556	0.0241922	0.0323055	["Irf3","Irf7"]
GO:0043648	7	dicarboxylic acid metabolic process	2	100	0.240556	0.0241922	0.0323055	["Stat5a","Stat5b"]
GO:0035239	4	tube morphogenesis	3	258	0.620634	0.0242077	0.0323055	["Gata3","Pbx1","Zeb1"]
GO:0007599	5	hemostasis	4	459	1.10415	0.0244344	0.0325696	["Gata3","Hnf4a","Irf1","Irf2"]
GO:0002285	5	lymphocyte activation involved in immune response	2	101	0.242962	0.0246434	0.0327708	["Gata3","Trp53"]
GO:0002573	7	myeloid leukocyte differentiation	2	101	0.242962	0.0246434	0.0327708	["Gata3","Irf4"]
GO:0045927	5	positive regulation of growth	3	262	0.630257	0.0251871	0.033415	["Stat5a","Stat5b","Tbx5"]
GO:1901990	7	regulation of mitotic cell cycle phase transition	3	262	0.630257	0.0251871	0.033415	["Foxo4","Pbx1","Trp53"]
GO:0032680	7	regulation of tumor necrosis factor production	2	104	0.250178	0.0260177	0.0343958	["Foxp3","Rara"]
GO:0034614	6	cellular response to reactive oxygen species	2	104	0.250178	0.0260177	0.0343958	["Foxo1","Klf4"]
GO:0055088	6	lipid homeostasis	2	104	0.250178	0.0260177	0.0343958	["Hnf4a","Nr1h3"]
GO:0051961	6	negative regulation of nervous system development	3	266	0.639879	0.0261877	0.03458	["Foxg1","Pbx1","Trp53"]
GO:0009617	4	response to bacterium	3	268	0.64469	0.026696	0.03521	["Irf3","Irf8","Mecom"]
GO:0035264	3	multicellular organism growth	2	106	0.254989	0.0269509	0.0354634	["Rara","Trp53"]
GO:0050729	7	positive regulation of inflammatory response	2	106	0.254989	0.0269509	0.0354634	["Stat5a","Stat5b"]
GO:0065009	3	regulation of molecular function	12	2740	6.59123	0.027286	0.0358625	["Bcl6","Foxp3","Gata3","Hnf4a","Irf4","Klf4","Nr1h3","Nr2f2","Pbx1","Rara","Trp53","Zfp90"]
GO:1903555	6	regulation of tumor necrosis factor superfamily cytokine production	2	107	0.257395	0.0274226	0.0360001	["Foxp3","Rara"]
GO:0007093	6	mitotic cell cycle checkpoint	2	109	0.262206	0.0283759	0.0371221	["Foxo4","Trp53"]
GO:0014706	6	striated muscle tissue development	2	109	0.262206	0.0283759	0.0371221	["Nr2f2","Tbx5"]
GO:1900182	6	positive regulation of protein localization to nucleus	2	109	0.262206	0.0283759	0.0371221	["Pou5f1","Zic1"]
GO:0010506	7	regulation of autophagy	3	275	0.661529	0.0285167	0.0372632	["Foxo1","Srebf1","Trp53"]
GO:0040011	2	locomotion	6	973	2.34061	0.0287639	0.0375428	["Foxc1","Foxg1","Gata3","Nr2f2","Stat5b","Tbx5"]
GO:0042752	4	regulation of circadian rhythm	2	110	0.264612	0.0288575	0.0376214	["Nr1h3","Trp53"]
GO:1901987	7	regulation of cell cycle phase transition	3	277	0.66634	0.0290488	0.0378271	["Foxo4","Pbx1","Trp53"]
GO:0032845	5	negative regulation of homeostatic process	2	111	0.267017	0.0293425	0.0381216	["Stat5a","Stat5b"]
GO:0097285	7	cell-type specific apoptotic process	2	111	0.267017	0.0293425	0.0381216	["Irf3","Trp53"]
GO:0008203	7	cholesterol metabolic process	2	112	0.269423	0.0298306	0.0387113	["Rxra","Srebf1"]
GO:0046824	8	positive regulation of nucleocytoplasmic transport	2	114	0.274234	0.0308168	0.039945	["Pou5f1","Zic1"]
GO:0007276	4	gamete generation	4	497	1.19556	0.0314655	0.0406925	["Bcl6","Rara","Sox30","Zfp39"]
GO:0051962	6	positive regulation of nervous system development	4	497	1.19556	0.0314655	0.0406925	["Bcl6","Foxg1","Rara","Zeb1"]
GO:1901615	4	organic hydroxy compound metabolic process	4	498	1.19797	0.0316651	0.0409038	["Gata3","Nr1h4","Rxra","Srebf1"]
GO:0001649	6	osteoblast differentiation	2	116	0.279045	0.0318157	0.0410045	["Cbfb","Nr1i3"]
GO:2000736	6	regulation of stem cell differentiation	2	116	0.279045	0.0318157	0.0410045	["Foxc1","Tbx5"]
GO:0050851	6	antigen receptor-mediated signaling pathway	2	117	0.28145	0.03232	0.0415595	["Foxp3","Gata3"]
GO:0090101	7	negative regulation of transmembrane receptor protein serine/threonine kinase signaling pathway	2	117	0.28145	0.03232	0.0415595	["Mecom","Trp53"]
GO:1903827	6	regulation of cellular protein localization	4	504	1.2124	0.0328784	0.0422295	["Hnf4a","Pou5f1","Srebf1","Zic1"]
GO:0034612	6	response to tumor necrosis factor	2	119	0.286262	0.033338	0.0427711	["Gata3","Irf1"]
GO:0048468	4	cell development	5	750	1.80417	0.0338272	0.0433495	["Bcl6","Foxc1","Foxg1","Prdm1","Rara"]
GO:0043436	5	oxoacid metabolic process	6	1012	2.43443	0.0339421	0.0434474	["Hnf4a","Nr1h3","Nr1h4","Rxra","Stat5a","Stat5b"]
GO:0007154	4	cell communication	6	1018	2.44886	0.0347895	0.0444817	["Foxo1","Gata3","Pou2f1","Srebf1","Tbx5","Trp53"]
GO:0050678	6	regulation of epithelial cell proliferation	3	298	0.716857	0.0349543	0.0446419	["Gata3","Nr2f2","Rreb1"]
GO:0006473	8	protein acetylation	2	124	0.298289	0.0359374	0.0458456	["Foxo1","Irf4"]
GO:0015718	6	monocarboxylic acid transport	2	125	0.300695	0.0364665	0.0463634	["Nr1h4","Rxra"]
GO:0016125	6	sterol metabolic process	2	125	0.300695	0.0364665	0.0463634	["Rxra","Srebf1"]
GO:0050680	7	negative regulation of epithelial cell proliferation	2	125	0.300695	0.0364665	0.0463634	["Gata3","Nr2f2"]
GO:0006082	4	organic acid metabolic process	6	1032	2.48254	0.0368203	0.0467606	["Hnf4a","Nr1h3","Nr1h4","Rxra","Stat5a","Stat5b"]
GO:0002224	7	toll-like receptor signaling pathway	2	126	0.3031	0.0369986	0.0468815	["Irf3","Irf7"]
GO:0008584	5	male gonad development	2	126	0.3031	0.0369986	0.0468815	["Gata3","Rara"]
GO:0060537	5	muscle tissue development	2	127	0.305506	0.0375337	0.0475062	["Nr2f2","Tbx5"]
GO:0006275	7	regulation of DNA replication	2	129	0.310317	0.0386129	0.0488174	["Klf4","Trp53"]
GO:0019220	7	regulation of phosphate metabolic process	8	1626	3.91144	0.0394894	0.0498698	["Foxo1","Hnf4a","Irf1","Klf4","Mecom","Nr2f2","Rara","Trp53"]
GO:0007517	5	muscle organ development	2	132	0.317534	0.0402538	0.0507782	["Foxk1","Foxo4"]
GO:0051174	6	regulation of phosphorus metabolic process	8	1639	3.94271	0.0410946	0.0517811	["Foxo1","Hnf4a","Irf1","Klf4","Mecom","Nr2f2","Rara","Trp53"]
GO:0035148	4	tube formation	2	134	0.322345	0.0413623	0.0520022	["Gata3","Rara"]
GO:0051262	8	protein tetramerization	2	134	0.322345	0.0413623	0.0520022	["Rxra","Trp53"]
GO:0002366	4	leukocyte activation involved in immune response	2	135	0.324751	0.0419208	0.052529	["Gata3","Trp53"]
GO:0048469	5	cell maturation	2	135	0.324751	0.0419208	0.052529	["Cbfb","Gata3"]
GO:0048705	5	skeletal system morphogenesis	2	135	0.324751	0.0419208	0.052529	["Tbx15","Zeb1"]
GO:0009967	6	positive regulation of signal transduction	7	1353	3.25472	0.0424438	0.0531146	["Gata3","Irf3","Irf7","Nr1h3","Pou5f1","Rara","Trp53"]
GO:0002263	4	cell activation involved in immune response	2	136	0.327156	0.0424823	0.0531146	["Gata3","Trp53"]
GO:0032989	4	cellular component morphogenesis	4	548	1.31825	0.0426092	0.0532143	["Bcl6","Foxf2","Foxg1","Gata3"]
GO:0061061	4	muscle structure development	2	138	0.331967	0.0436136	0.0544086	["Foxk1","Foxo4"]
GO:0022412	4	cellular process involved in reproduction in multicellular organism	3	329	0.791429	0.0447215	0.0557291	["Foxc1","Prdm1","Rara"]
GO:0044765	3	single-organism transport	12	2950	7.0964	0.0448925	0.0558805	["Bcl6","Egr2","Gata3","Irf8","Nr1h3","Nr1h4","Nr1i2","Rara","Rxra","Stat5a","Stat5b","Trp53"]
GO:0006631	5	fatty acid metabolic process	3	333	0.801051	0.0460715	0.0572849	["Nr1h3","Stat5a","Stat5b"]
GO:0042493	4	response to drug	4	563	1.35433	0.0462632	0.0574601	["Gata3","Hnf4a","Srebf1","Trp53"]
GO:0080135	5	regulation of cellular response to stress	4	568	1.36636	0.0475194	0.0589553	["Bcl6","Foxo1","Mecom","Trp53"]
GO:0002064	5	epithelial cell development	2	145	0.348806	0.0476609	0.0590013	["Prdm1","Rara"]
GO:0033273	5	response to vitamin	2	145	0.348806	0.0476609	0.0590013	["Rara","Rxra"]
GO:0001503	4	ossification	2	146	0.351212	0.04825	0.0596652	["Cbfb","Foxc1"]
GO:0006915	6	apoptotic process	5	834	2.00624	0.0495783	0.0612406	["Foxo1","Irf1","Irf3","Mecom","Trp53"]

## Sheet: MyD88 Independent
ID	Level	Title	Number of hits	Group size	Expected hits	P-value	Adjusted P-value	Hit names
GO:0006351	6	transcription, DNA-templated	150	2110	14.6632	7.03074e-147	7.54362e-144	["Alx4","Arid5a","Arx","Atf4","Bbx","Bcl6","Cdx2","Cebpa","Cebpb","Cebpg","Ctnnb1","Dbp","Dlx2","E2f6","E4f1","Egr2","Elf1","Fos","Fosb","Fosl2","Foxa2","Foxa3","Foxc1","Foxd1","Foxg1","Foxi1","Foxj1","Foxj2","Foxj3","Foxk1","Foxo1","Foxo3","Foxo4","Foxp1","Foxp3","Gata6","Gfi1b","Gtf2b","Hlf","Hlx","Hmga1","Hmga2","Hnf1a","Hnf1b","Hoxa10","Hoxa9","Hoxb3","Hoxd13","Hoxd3","Irf1","Irf2","Irf3","Ir…
GO:0097659	7	nucleic acid-templated transcription	150	2111	14.6702	7.56632e-147	7.54362e-144	["Alx4","Arid5a","Arx","Atf4","Bbx","Bcl6","Cdx2","Cebpa","Cebpb","Cebpg","Ctnnb1","Dbp","Dlx2","E2f6","E4f1","Egr2","Elf1","Fos","Fosb","Fosl2","Foxa2","Foxa3","Foxc1","Foxd1","Foxg1","Foxi1","Foxj1","Foxj2","Foxj3","Foxk1","Foxo1","Foxo3","Foxo4","Foxp1","Foxp3","Gata6","Gfi1b","Gtf2b","Hlf","Hlx","Hmga1","Hmga2","Hnf1a","Hnf1b","Hoxa10","Hoxa9","Hoxb3","Hoxd13","Hoxd3","Irf1","Irf2","Irf3","Ir…
GO:0032774	6	RNA biosynthetic process	150	2282	15.8585	1.29324e-141	8.59574e-139	["Alx4","Arid5a","Arx","Atf4","Bbx","Bcl6","Cdx2","Cebpa","Cebpb","Cebpg","Ctnnb1","Dbp","Dlx2","E2f6","E4f1","Egr2","Elf1","Fos","Fosb","Fosl2","Foxa2","Foxa3","Foxc1","Foxd1","Foxg1","Foxi1","Foxj1","Foxj2","Foxj3","Foxk1","Foxo1","Foxo3","Foxo4","Foxp1","Foxp3","Gata6","Gfi1b","Gtf2b","Hlf","Hlx","Hmga1","Hmga2","Hnf1a","Hnf1b","Hoxa10","Hoxa9","Hoxb3","Hoxd13","Hoxd3","Irf1","Irf2","Irf3","Ir…
GO:0034654	5	nucleobase-containing compound biosynthetic process	150	2570	17.8599	1.16339e-133	5.79951e-131	["Alx4","Arid5a","Arx","Atf4","Bbx","Bcl6","Cdx2","Cebpa","Cebpb","Cebpg","Ctnnb1","Dbp","Dlx2","E2f6","E4f1","Egr2","Elf1","Fos","Fosb","Fosl2","Foxa2","Foxa3","Foxc1","Foxd1","Foxg1","Foxi1","Foxj1","Foxj2","Foxj3","Foxk1","Foxo1","Foxo3","Foxo4","Foxp1","Foxp3","Gata6","Gfi1b","Gtf2b","Hlf","Hlx","Hmga1","Hmga2","Hnf1a","Hnf1b","Hoxa10","Hoxa9","Hoxb3","Hoxd13","Hoxd3","Irf1","Irf2","Irf3","Ir…
GO:0018130	5	heterocycle biosynthetic process	150	2643	18.3672	8.6111e-132	3.2959e-129	["Alx4","Arid5a","Arx","Atf4","Bbx","Bcl6","Cdx2","Cebpa","Cebpb","Cebpg","Ctnnb1","Dbp","Dlx2","E2f6","E4f1","Egr2","Elf1","Fos","Fosb","Fosl2","Foxa2","Foxa3","Foxc1","Foxd1","Foxg1","Foxi1","Foxj1","Foxj2","Foxj3","Foxk1","Foxo1","Foxo3","Foxo4","Foxp1","Foxp3","Gata6","Gfi1b","Gtf2b","Hlf","Hlx","Hmga1","Hmga2","Hnf1a","Hnf1b","Hoxa10","Hoxa9","Hoxb3","Hoxd13","Hoxd3","Irf1","Irf2","Irf3","Ir…
GO:0006355	7	regulation of transcription, DNA-templated	155	3173	22.0504	9.91746e-132	3.2959e-129	["Alx4","Arid5a","Arx","Atf4","Bbx","Bcl6","Cdx2","Cebpa","Cebpb","Cebpg","Ctnnb1","Dbp","Dlx1","Dlx2","E2f6","E4f1","Egr2","Elf1","Fos","Fosb","Fosl2","Foxa2","Foxa3","Foxc1","Foxd1","Foxg1","Foxi1","Foxj1","Foxj2","Foxj3","Foxk1","Foxo1","Foxo3","Foxo4","Foxp1","Foxp3","Gata6","Gfi1b","Gtf2b","Hlf","Hlx","Hmga1","Hmga2","Hnf1a","Hnf1b","Hoxa10","Hoxa9","Hoxb3","Hoxd13","Hoxd3","Irf1","Irf2","Ir…
GO:0019438	5	aromatic compound biosynthetic process	150	2650	18.4159	1.29268e-131	3.6823e-129	["Alx4","Arid5a","Arx","Atf4","Bbx","Bcl6","Cdx2","Cebpa","Cebpb","Cebpg","Ctnnb1","Dbp","Dlx2","E2f6","E4f1","Egr2","Elf1","Fos","Fosb","Fosl2","Foxa2","Foxa3","Foxc1","Foxd1","Foxg1","Foxi1","Foxj1","Foxj2","Foxj3","Foxk1","Foxo1","Foxo3","Foxo4","Foxp1","Foxp3","Gata6","Gfi1b","Gtf2b","Hlf","Hlx","Hmga1","Hmga2","Hnf1a","Hnf1b","Hoxa10","Hoxa9","Hoxb3","Hoxd13","Hoxd3","Irf1","Irf2","Irf3","Ir…
GO:1903506	8	regulation of nucleic acid-templated transcription	155	3195	22.2033	2.96932e-131	7.40102e-129	["Alx4","Arid5a","Arx","Atf4","Bbx","Bcl6","Cdx2","Cebpa","Cebpb","Cebpg","Ctnnb1","Dbp","Dlx1","Dlx2","E2f6","E4f1","Egr2","Elf1","Fos","Fosb","Fosl2","Foxa2","Foxa3","Foxc1","Foxd1","Foxg1","Foxi1","Foxj1","Foxj2","Foxj3","Foxk1","Foxo1","Foxo3","Foxo4","Foxp1","Foxp3","Gata6","Gfi1b","Gtf2b","Hlf","Hlx","Hmga1","Hmga2","Hnf1a","Hnf1b","Hoxa10","Hoxa9","Hoxb3","Hoxd13","Hoxd3","Irf1","Irf2","Ir…
GO:2001141	7	regulation of RNA biosynthetic process	155	3215	22.3423	7.99291e-131	1.77087e-128	["Alx4","Arid5a","Arx","Atf4","Bbx","Bcl6","Cdx2","Cebpa","Cebpb","Cebpg","Ctnnb1","Dbp","Dlx1","Dlx2","E2f6","E4f1","Egr2","Elf1","Fos","Fosb","Fosl2","Foxa2","Foxa3","Foxc1","Foxd1","Foxg1","Foxi1","Foxj1","Foxj2","Foxj3","Foxk1","Foxo1","Foxo3","Foxo4","Foxp1","Foxp3","Gata6","Gfi1b","Gtf2b","Hlf","Hlx","Hmga1","Hmga2","Hnf1a","Hnf1b","Hoxa10","Hoxa9","Hoxb3","Hoxd13","Hoxd3","Irf1","Irf2","Ir…
GO:0044271	5	cellular nitrogen compound biosynthetic process	150	2727	18.951	1.04958e-129	2.09286e-127	["Alx4","Arid5a","Arx","Atf4","Bbx","Bcl6","Cdx2","Cebpa","Cebpb","Cebpg","Ctnnb1","Dbp","Dlx2","E2f6","E4f1","Egr2","Elf1","Fos","Fosb","Fosl2","Foxa2","Foxa3","Foxc1","Foxd1","Foxg1","Foxi1","Foxj1","Foxj2","Foxj3","Foxk1","Foxo1","Foxo3","Foxo4","Foxp1","Foxp3","Gata6","Gfi1b","Gtf2b","Hlf","Hlx","Hmga1","Hmga2","Hnf1a","Hnf1b","Hoxa10","Hoxa9","Hoxb3","Hoxd13","Hoxd3","Irf1","Irf2","Irf3","Ir…
GO:0034645	5	cellular macromolecule biosynthetic process	150	2748	19.0969	3.40498e-129	6.17231e-127	["Alx4","Arid5a","Arx","Atf4","Bbx","Bcl6","Cdx2","Cebpa","Cebpb","Cebpg","Ctnnb1","Dbp","Dlx2","E2f6","E4f1","Egr2","Elf1","Fos","Fosb","Fosl2","Foxa2","Foxa3","Foxc1","Foxd1","Foxg1","Foxi1","Foxj1","Foxj2","Foxj3","Foxk1","Foxo1","Foxo3","Foxo4","Foxp1","Foxp3","Gata6","Gfi1b","Gtf2b","Hlf","Hlx","Hmga1","Hmga2","Hnf1a","Hnf1b","Hoxa10","Hoxa9","Hoxb3","Hoxd13","Hoxd3","Irf1","Irf2","Irf3","Ir…
GO:0051252	6	regulation of RNA metabolic process	155	3317	23.0511	1.13268e-128	1.88214e-126	["Alx4","Arid5a","Arx","Atf4","Bbx","Bcl6","Cdx2","Cebpa","Cebpb","Cebpg","Ctnnb1","Dbp","Dlx1","Dlx2","E2f6","E4f1","Egr2","Elf1","Fos","Fosb","Fosl2","Foxa2","Foxa3","Foxc1","Foxd1","Foxg1","Foxi1","Foxj1","Foxj2","Foxj3","Foxk1","Foxo1","Foxo3","Foxo4","Foxp1","Foxp3","Gata6","Gfi1b","Gtf2b","Hlf","Hlx","Hmga1","Hmga2","Hnf1a","Hnf1b","Hoxa10","Hoxa9","Hoxb3","Hoxd13","Hoxd3","Irf1","Irf2","Ir…
GO:1901362	5	organic cyclic compound biosynthetic process	150	2778	19.3054	1.80007e-128	2.76103e-126	["Alx4","Arid5a","Arx","Atf4","Bbx","Bcl6","Cdx2","Cebpa","Cebpb","Cebpg","Ctnnb1","Dbp","Dlx2","E2f6","E4f1","Egr2","Elf1","Fos","Fosb","Fosl2","Foxa2","Foxa3","Foxc1","Foxd1","Foxg1","Foxi1","Foxj1","Foxj2","Foxj3","Foxk1","Foxo1","Foxo3","Foxo4","Foxp1","Foxp3","Gata6","Gfi1b","Gtf2b","Hlf","Hlx","Hmga1","Hmga2","Hnf1a","Hnf1b","Hoxa10","Hoxa9","Hoxb3","Hoxd13","Hoxd3","Irf1","Irf2","Irf3","Ir…
GO:0009059	5	macromolecule biosynthetic process	150	2917	20.2714	3.19051e-125	4.5442e-123	["Alx4","Arid5a","Arx","Atf4","Bbx","Bcl6","Cdx2","Cebpa","Cebpb","Cebpg","Ctnnb1","Dbp","Dlx2","E2f6","E4f1","Egr2","Elf1","Fos","Fosb","Fosl2","Foxa2","Foxa3","Foxc1","Foxd1","Foxg1","Foxi1","Foxj1","Foxj2","Foxj3","Foxk1","Foxo1","Foxo3","Foxo4","Foxp1","Foxp3","Gata6","Gfi1b","Gtf2b","Hlf","Hlx","Hmga1","Hmga2","Hnf1a","Hnf1b","Hoxa10","Hoxa9","Hoxb3","Hoxd13","Hoxd3","Irf1","Irf2","Irf3","Ir…
GO:2000112	7	regulation of cellular macromolecule biosynthetic process	155	3507	24.3715	7.70211e-125	1.02387e-122	["Alx4","Arid5a","Arx","Atf4","Bbx","Bcl6","Cdx2","Cebpa","Cebpb","Cebpg","Ctnnb1","Dbp","Dlx1","Dlx2","E2f6","E4f1","Egr2","Elf1","Fos","Fosb","Fosl2","Foxa2","Foxa3","Foxc1","Foxd1","Foxg1","Foxi1","Foxj1","Foxj2","Foxj3","Foxk1","Foxo1","Foxo3","Foxo4","Foxp1","Foxp3","Gata6","Gfi1b","Gtf2b","Hlf","Hlx","Hmga1","Hmga2","Hnf1a","Hnf1b","Hoxa10","Hoxa9","Hoxb3","Hoxd13","Hoxd3","Irf1","Irf2","Ir…
GO:0016070	5	RNA metabolic process	150	2979	20.7022	7.97247e-124	9.93569e-122	["Alx4","Arid5a","Arx","Atf4","Bbx","Bcl6","Cdx2","Cebpa","Cebpb","Cebpg","Ctnnb1","Dbp","Dlx2","E2f6","E4f1","Egr2","Elf1","Fos","Fosb","Fosl2","Foxa2","Foxa3","Foxc1","Foxd1","Foxg1","Foxi1","Foxj1","Foxj2","Foxj3","Foxk1","Foxo1","Foxo3","Foxo4","Foxp1","Foxp3","Gata6","Gfi1b","Gtf2b","Hlf","Hlx","Hmga1","Hmga2","Hnf1a","Hnf1b","Hoxa10","Hoxa9","Hoxb3","Hoxd13","Hoxd3","Irf1","Irf2","Irf3","Ir…
GO:0010556	6	regulation of macromolecule biosynthetic process	155	3626	25.1985	1.51395e-122	1.77578e-120	["Alx4","Arid5a","Arx","Atf4","Bbx","Bcl6","Cdx2","Cebpa","Cebpb","Cebpg","Ctnnb1","Dbp","Dlx1","Dlx2","E2f6","E4f1","Egr2","Elf1","Fos","Fosb","Fosl2","Foxa2","Foxa3","Foxc1","Foxd1","Foxg1","Foxi1","Foxj1","Foxj2","Foxj3","Foxk1","Foxo1","Foxo3","Foxo4","Foxp1","Foxp3","Gata6","Gfi1b","Gtf2b","Hlf","Hlx","Hmga1","Hmga2","Hnf1a","Hnf1b","Hoxa10","Hoxa9","Hoxb3","Hoxd13","Hoxd3","Irf1","Irf2","Ir…
GO:0019219	6	regulation of nucleobase-containing compound metabolic process	155	3642	25.3097	3.03803e-122	3.36546e-120	["Alx4","Arid5a","Arx","Atf4","Bbx","Bcl6","Cdx2","Cebpa","Cebpb","Cebpg","Ctnnb1","Dbp","Dlx1","Dlx2","E2f6","E4f1","Egr2","Elf1","Fos","Fosb","Fosl2","Foxa2","Foxa3","Foxc1","Foxd1","Foxg1","Foxi1","Foxj1","Foxj2","Foxj3","Foxk1","Foxo1","Foxo3","Foxo4","Foxp1","Foxp3","Gata6","Gfi1b","Gtf2b","Hlf","Hlx","Hmga1","Hmga2","Hnf1a","Hnf1b","Hoxa10","Hoxa9","Hoxb3","Hoxd13","Hoxd3","Irf1","Irf2","Ir…
GO:0051171	5	regulation of nitrogen compound metabolic process	155	3751	26.0672	3.21912e-120	3.37838e-118	["Alx4","Arid5a","Arx","Atf4","Bbx","Bcl6","Cdx2","Cebpa","Cebpb","Cebpg","Ctnnb1","Dbp","Dlx1","Dlx2","E2f6","E4f1","Egr2","Elf1","Fos","Fosb","Fosl2","Foxa2","Foxa3","Foxc1","Foxd1","Foxg1","Foxi1","Foxj1","Foxj2","Foxj3","Foxk1","Foxo1","Foxo3","Foxo4","Foxp1","Foxp3","Gata6","Gfi1b","Gtf2b","Hlf","Hlx","Hmga1","Hmga2","Hnf1a","Hnf1b","Hoxa10","Hoxa9","Hoxb3","Hoxd13","Hoxd3","Irf1","Irf2","Ir…
GO:0031326	6	regulation of cellular biosynthetic process	155	3838	26.6718	1.20616e-118	1.20254e-116	["Alx4","Arid5a","Arx","Atf4","Bbx","Bcl6","Cdx2","Cebpa","Cebpb","Cebpg","Ctnnb1","Dbp","Dlx1","Dlx2","E2f6","E4f1","Egr2","Elf1","Fos","Fosb","Fosl2","Foxa2","Foxa3","Foxc1","Foxd1","Foxg1","Foxi1","Foxj1","Foxj2","Foxj3","Foxk1","Foxo1","Foxo3","Foxo4","Foxp1","Foxp3","Gata6","Gfi1b","Gtf2b","Hlf","Hlx","Hmga1","Hmga2","Hnf1a","Hnf1b","Hoxa10","Hoxa9","Hoxb3","Hoxd13","Hoxd3","Irf1","Irf2","Ir…
GO:0009889	5	regulation of biosynthetic process	155	3890	27.0331	1.0108e-117	9.59778e-116	["Alx4","Arid5a","Arx","Atf4","Bbx","Bcl6","Cdx2","Cebpa","Cebpb","Cebpg","Ctnnb1","Dbp","Dlx1","Dlx2","E2f6","E4f1","Egr2","Elf1","Fos","Fosb","Fosl2","Foxa2","Foxa3","Foxc1","Foxd1","Foxg1","Foxi1","Foxj1","Foxj2","Foxj3","Foxk1","Foxo1","Foxo3","Foxo4","Foxp1","Foxp3","Gata6","Gfi1b","Gtf2b","Hlf","Hlx","Hmga1","Hmga2","Hnf1a","Hnf1b","Hoxa10","Hoxa9","Hoxb3","Hoxd13","Hoxd3","Irf1","Irf2","Ir…
GO:0010468	6	regulation of gene expression	155	3959	27.5127	1.62359e-116	1.47156e-114	["Alx4","Arid5a","Arx","Atf4","Bbx","Bcl6","Cdx2","Cebpa","Cebpb","Cebpg","Ctnnb1","Dbp","Dlx1","Dlx2","E2f6","E4f1","Egr2","Elf1","Fos","Fosb","Fosl2","Foxa2","Foxa3","Foxc1","Foxd1","Foxg1","Foxi1","Foxj1","Foxj2","Foxj3","Foxk1","Foxo1","Foxo3","Foxo4","Foxp1","Foxp3","Gata6","Gfi1b","Gtf2b","Hlf","Hlx","Hmga1","Hmga2","Hnf1a","Hnf1b","Hoxa10","Hoxa9","Hoxb3","Hoxd13","Hoxd3","Irf1","Irf2","Ir…
GO:0090304	5	nucleic acid metabolic process	150	3462	24.0588	7.23993e-114	6.27671e-112	["Alx4","Arid5a","Arx","Atf4","Bbx","Bcl6","Cdx2","Cebpa","Cebpb","Cebpg","Ctnnb1","Dbp","Dlx2","E2f6","E4f1","Egr2","Elf1","Fos","Fosb","Fosl2","Foxa2","Foxa3","Foxc1","Foxd1","Foxg1","Foxi1","Foxj1","Foxj2","Foxj3","Foxk1","Foxo1","Foxo3","Foxo4","Foxp1","Foxp3","Gata6","Gfi1b","Gtf2b","Hlf","Hlx","Hmga1","Hmga2","Hnf1a","Hnf1b","Hoxa10","Hoxa9","Hoxb3","Hoxd13","Hoxd3","Irf1","Irf2","Irf3","Ir…
GO:0006366	7	transcription from RNA polymerase II promoter	106	891	6.19191	2.01636e-111	1.67526e-109	["Alx4","Arx","Atf4","Bcl6","Cdx2","Cebpa","Cebpb","Cebpg","Dbp","Dlx2","Egr2","Elf1","Fos","Fosb","Fosl2","Foxa2","Foxa3","Foxc1","Foxd1","Foxi1","Foxj1","Foxj2","Foxj3","Foxk1","Foxo1","Foxo3","Foxo4","Foxp1","Foxp3","Gata6","Gfi1b","Gtf2b","Hlf","Hmga1","Hmga2","Hnf1a","Hnf1b","Hoxa10","Hoxd13","Irf1","Irf2","Irf3","Irf4","Irf7","Irf9","Jdp2","Jun","Junb","Jund","Lef1","Lhx3","Mafb","Meis1","M…
GO:0044249	4	cellular biosynthetic process	150	3791	26.3452	7.13943e-108	5.69441e-106	["Alx4","Arid5a","Arx","Atf4","Bbx","Bcl6","Cdx2","Cebpa","Cebpb","Cebpg","Ctnnb1","Dbp","Dlx2","E2f6","E4f1","Egr2","Elf1","Fos","Fosb","Fosl2","Foxa2","Foxa3","Foxc1","Foxd1","Foxg1","Foxi1","Foxj1","Foxj2","Foxj3","Foxk1","Foxo1","Foxo3","Foxo4","Foxp1","Foxp3","Gata6","Gfi1b","Gtf2b","Hlf","Hlx","Hmga1","Hmga2","Hnf1a","Hnf1b","Hoxa10","Hoxa9","Hoxb3","Hoxd13","Hoxd3","Irf1","Irf2","Irf3","Ir…
GO:0006139	4	nucleobase-containing compound metabolic process	150	3924	27.2694	1.33658e-105	1.02506e-103	["Alx4","Arid5a","Arx","Atf4","Bbx","Bcl6","Cdx2","Cebpa","Cebpb","Cebpg","Ctnnb1","Dbp","Dlx2","E2f6","E4f1","Egr2","Elf1","Fos","Fosb","Fosl2","Foxa2","Foxa3","Foxc1","Foxd1","Foxg1","Foxi1","Foxj1","Foxj2","Foxj3","Foxk1","Foxo1","Foxo3","Foxo4","Foxp1","Foxp3","Gata6","Gfi1b","Gtf2b","Hlf","Hlx","Hmga1","Hmga2","Hnf1a","Hnf1b","Hoxa10","Hoxa9","Hoxb3","Hoxd13","Hoxd3","Irf1","Irf2","Irf3","Ir…
GO:1901576	4	organic substance biosynthetic process	150	3936	27.3528	2.12375e-105	1.56843e-103	["Alx4","Arid5a","Arx","Atf4","Bbx","Bcl6","Cdx2","Cebpa","Cebpb","Cebpg","Ctnnb1","Dbp","Dlx2","E2f6","E4f1","Egr2","Elf1","Fos","Fosb","Fosl2","Foxa2","Foxa3","Foxc1","Foxd1","Foxg1","Foxi1","Foxj1","Foxj2","Foxj3","Foxk1","Foxo1","Foxo3","Foxo4","Foxp1","Foxp3","Gata6","Gfi1b","Gtf2b","Hlf","Hlx","Hmga1","Hmga2","Hnf1a","Hnf1b","Hoxa10","Hoxa9","Hoxb3","Hoxd13","Hoxd3","Irf1","Irf2","Irf3","Ir…
GO:0009058	3	biosynthetic process	150	4021	27.9435	5.4174e-104	3.85796e-102	["Alx4","Arid5a","Arx","Atf4","Bbx","Bcl6","Cdx2","Cebpa","Cebpb","Cebpg","Ctnnb1","Dbp","Dlx2","E2f6","E4f1","Egr2","Elf1","Fos","Fosb","Fosl2","Foxa2","Foxa3","Foxc1","Foxd1","Foxg1","Foxi1","Foxj1","Foxj2","Foxj3","Foxk1","Foxo1","Foxo3","Foxo4","Foxp1","Foxp3","Gata6","Gfi1b","Gtf2b","Hlf","Hlx","Hmga1","Hmga2","Hnf1a","Hnf1b","Hoxa10","Hoxa9","Hoxb3","Hoxd13","Hoxd3","Irf1","Irf2","Irf3","Ir…
GO:0046483	4	heterocycle metabolic process	150	4115	28.5968	1.79556e-102	1.23461e-100	["Alx4","Arid5a","Arx","Atf4","Bbx","Bcl6","Cdx2","Cebpa","Cebpb","Cebpg","Ctnnb1","Dbp","Dlx2","E2f6","E4f1","Egr2","Elf1","Fos","Fosb","Fosl2","Foxa2","Foxa3","Foxc1","Foxd1","Foxg1","Foxi1","Foxj1","Foxj2","Foxj3","Foxk1","Foxo1","Foxo3","Foxo4","Foxp1","Foxp3","Gata6","Gfi1b","Gtf2b","Hlf","Hlx","Hmga1","Hmga2","Hnf1a","Hnf1b","Hoxa10","Hoxa9","Hoxb3","Hoxd13","Hoxd3","Irf1","Irf2","Irf3","Ir…
GO:0006725	4	cellular aromatic compound metabolic process	150	4145	28.8052	5.39411e-102	3.58528e-100	["Alx4","Arid5a","Arx","Atf4","Bbx","Bcl6","Cdx2","Cebpa","Cebpb","Cebpg","Ctnnb1","Dbp","Dlx2","E2f6","E4f1","Egr2","Elf1","Fos","Fosb","Fosl2","Foxa2","Foxa3","Foxc1","Foxd1","Foxg1","Foxi1","Foxj1","Foxj2","Foxj3","Foxk1","Foxo1","Foxo3","Foxo4","Foxp1","Foxp3","Gata6","Gfi1b","Gtf2b","Hlf","Hlx","Hmga1","Hmga2","Hnf1a","Hnf1b","Hoxa10","Hoxa9","Hoxb3","Hoxd13","Hoxd3","Irf1","Irf2","Irf3","Ir…
GO:0006357	8	regulation of transcription from RNA polymerase II promoter	121	1822	12.6618	1.44705e-100	9.30778e-99	["Alx4","Arid5a","Arx","Atf4","Bcl6","Cdx2","Cebpa","Cebpb","Cebpg","Ctnnb1","Dbp","Dlx1","Dlx2","E2f6","E4f1","Egr2","Elf1","Fos","Fosb","Fosl2","Foxa2","Foxa3","Foxc1","Foxd1","Foxg1","Foxi1","Foxj1","Foxj2","Foxj3","Foxk1","Foxo1","Foxo3","Foxo4","Foxp1","Foxp3","Gata6","Gfi1b","Hmga1","Hmga2","Hnf1a","Hnf1b","Hoxa10","Hoxb3","Hoxd13","Irf1","Irf2","Irf3","Irf4","Irf5","Irf7","Irf8","Jdp2","Ju…
GO:1901360	4	organic cyclic compound metabolic process	150	4368	30.355	1.4968e-98	9.3269e-97	["Alx4","Arid5a","Arx","Atf4","Bbx","Bcl6","Cdx2","Cebpa","Cebpb","Cebpg","Ctnnb1","Dbp","Dlx2","E2f6","E4f1","Egr2","Elf1","Fos","Fosb","Fosl2","Foxa2","Foxa3","Foxc1","Foxd1","Foxg1","Foxi1","Foxj1","Foxj2","Foxj3","Foxk1","Foxo1","Foxo3","Foxo4","Foxp1","Foxp3","Gata6","Gfi1b","Gtf2b","Hlf","Hlx","Hmga1","Hmga2","Hnf1a","Hnf1b","Hoxa10","Hoxa9","Hoxb3","Hoxd13","Hoxd3","Irf1","Irf2","Irf3","Ir…
GO:0034641	4	cellular nitrogen compound metabolic process	150	4437	30.8345	1.59948e-97	9.66475e-96	["Alx4","Arid5a","Arx","Atf4","Bbx","Bcl6","Cdx2","Cebpa","Cebpb","Cebpg","Ctnnb1","Dbp","Dlx2","E2f6","E4f1","Egr2","Elf1","Fos","Fosb","Fosl2","Foxa2","Foxa3","Foxc1","Foxd1","Foxg1","Foxi1","Foxj1","Foxj2","Foxj3","Foxk1","Foxo1","Foxo3","Foxo4","Foxp1","Foxp3","Gata6","Gfi1b","Gtf2b","Hlf","Hlx","Hmga1","Hmga2","Hnf1a","Hnf1b","Hoxa10","Hoxa9","Hoxb3","Hoxd13","Hoxd3","Irf1","Irf2","Irf3","Ir…
GO:0080090	5	regulation of primary metabolic process	155	5345	37.1445	5.37571e-96	3.1527e-94	["Alx4","Arid5a","Arx","Atf4","Bbx","Bcl6","Cdx2","Cebpa","Cebpb","Cebpg","Ctnnb1","Dbp","Dlx1","Dlx2","E2f6","E4f1","Egr2","Elf1","Fos","Fosb","Fosl2","Foxa2","Foxa3","Foxc1","Foxd1","Foxg1","Foxi1","Foxj1","Foxj2","Foxj3","Foxk1","Foxo1","Foxo3","Foxo4","Foxp1","Foxp3","Gata6","Gfi1b","Gtf2b","Hlf","Hlx","Hmga1","Hmga2","Hnf1a","Hnf1b","Hoxa10","Hoxa9","Hoxb3","Hoxd13","Hoxd3","Irf1","Irf2","Ir…
GO:0060255	5	regulation of macromolecule metabolic process	155	5423	37.6866	5.22314e-95	2.9757e-93	["Alx4","Arid5a","Arx","Atf4","Bbx","Bcl6","Cdx2","Cebpa","Cebpb","Cebpg","Ctnnb1","Dbp","Dlx1","Dlx2","E2f6","E4f1","Egr2","Elf1","Fos","Fosb","Fosl2","Foxa2","Foxa3","Foxc1","Foxd1","Foxg1","Foxi1","Foxj1","Foxj2","Foxj3","Foxk1","Foxo1","Foxo3","Foxo4","Foxp1","Foxp3","Gata6","Gfi1b","Gtf2b","Hlf","Hlx","Hmga1","Hmga2","Hnf1a","Hnf1b","Hoxa10","Hoxa9","Hoxb3","Hoxd13","Hoxd3","Irf1","Irf2","Ir…
GO:0031323	5	regulation of cellular metabolic process	155	5591	38.8541	6.26128e-93	3.46805e-91	["Alx4","Arid5a","Arx","Atf4","Bbx","Bcl6","Cdx2","Cebpa","Cebpb","Cebpg","Ctnnb1","Dbp","Dlx1","Dlx2","E2f6","E4f1","Egr2","Elf1","Fos","Fosb","Fosl2","Foxa2","Foxa3","Foxc1","Foxd1","Foxg1","Foxi1","Foxj1","Foxj2","Foxj3","Foxk1","Foxo1","Foxo3","Foxo4","Foxp1","Foxp3","Gata6","Gfi1b","Gtf2b","Hlf","Hlx","Hmga1","Hmga2","Hnf1a","Hnf1b","Hoxa10","Hoxa9","Hoxb3","Hoxd13","Hoxd3","Irf1","Irf2","Ir…
GO:0006807	3	nitrogen compound metabolic process	150	4818	33.4822	4.01548e-92	2.16402e-90	["Alx4","Arid5a","Arx","Atf4","Bbx","Bcl6","Cdx2","Cebpa","Cebpb","Cebpg","Ctnnb1","Dbp","Dlx2","E2f6","E4f1","Egr2","Elf1","Fos","Fosb","Fosl2","Foxa2","Foxa3","Foxc1","Foxd1","Foxg1","Foxi1","Foxj1","Foxj2","Foxj3","Foxk1","Foxo1","Foxo3","Foxo4","Foxp1","Foxp3","Gata6","Gfi1b","Gtf2b","Hlf","Hlx","Hmga1","Hmga2","Hnf1a","Hnf1b","Hoxa10","Hoxa9","Hoxb3","Hoxd13","Hoxd3","Irf1","Irf2","Irf3","Ir…
GO:0045944	9	positive regulation of transcription from RNA polymerase II promoter	94	1054	7.32466	3.40937e-84	1.78902e-82	["Alx4","Arid5a","Atf4","Cebpa","Cebpb","Cebpg","Ctnnb1","Dbp","Dlx2","Egr2","Elf1","Fos","Fosb","Fosl2","Foxa2","Foxa3","Foxc1","Foxd1","Foxi1","Foxj1","Foxj2","Foxo1","Foxo3","Foxp1","Foxp3","Gata6","Hmga1","Hmga2","Hnf1a","Hnf1b","Hoxa10","Hoxd13","Irf1","Irf2","Irf4","Irf5","Irf7","Irf8","Jun","Junb","Jund","Klf2","Lef1","Lhx3","Mafb","Mecom","Meis1","Meox1","Myb","Nfatc2","Nfatc4","Nfe2l1","…
GO:0045893	8	positive regulation of transcription, DNA-templated	103	1469	10.2087	2.24368e-83	1.11847e-81	["Alx4","Arid5a","Atf4","Cdx2","Cebpa","Cebpb","Cebpg","Ctnnb1","Dbp","Dlx2","Egr2","Elf1","Fos","Fosb","Fosl2","Foxa2","Foxa3","Foxc1","Foxd1","Foxi1","Foxj1","Foxj2","Foxk1","Foxo1","Foxo3","Foxo4","Foxp1","Foxp3","Gata6","Hmga1","Hmga2","Hnf1a","Hnf1b","Hoxa10","Hoxd13","Irf1","Irf2","Irf4","Irf5","Irf6","Irf7","Irf8","Jun","Junb","Jund","Klf2","Lef1","Lhx3","Lhx5","Mafb","Mecom","Meis1","Meox…
GO:1903508	9	positive regulation of nucleic acid-templated transcription	103	1469	10.2087	2.24368e-83	1.11847e-81	["Alx4","Arid5a","Atf4","Cdx2","Cebpa","Cebpb","Cebpg","Ctnnb1","Dbp","Dlx2","Egr2","Elf1","Fos","Fosb","Fosl2","Foxa2","Foxa3","Foxc1","Foxd1","Foxi1","Foxj1","Foxj2","Foxk1","Foxo1","Foxo3","Foxo4","Foxp1","Foxp3","Gata6","Hmga1","Hmga2","Hnf1a","Hnf1b","Hoxa10","Hoxd13","Irf1","Irf2","Irf4","Irf5","Irf6","Irf7","Irf8","Jun","Junb","Jund","Klf2","Lef1","Lhx3","Lhx5","Mafb","Mecom","Meis1","Meox…
GO:0019222	4	regulation of metabolic process	155	6481	45.039	7.02249e-83	3.41533e-81	["Alx4","Arid5a","Arx","Atf4","Bbx","Bcl6","Cdx2","Cebpa","Cebpb","Cebpg","Ctnnb1","Dbp","Dlx1","Dlx2","E2f6","E4f1","Egr2","Elf1","Fos","Fosb","Fosl2","Foxa2","Foxa3","Foxc1","Foxd1","Foxg1","Foxi1","Foxj1","Foxj2","Foxj3","Foxk1","Foxo1","Foxo3","Foxo4","Foxp1","Foxp3","Gata6","Gfi1b","Gtf2b","Hlf","Hlx","Hmga1","Hmga2","Hnf1a","Hnf1b","Hoxa10","Hoxa9","Hoxb3","Hoxd13","Hoxd3","Irf1","Irf2","Ir…
GO:1902680	8	positive regulation of RNA biosynthetic process	103	1494	10.3824	1.27612e-82	6.05852e-81	["Alx4","Arid5a","Atf4","Cdx2","Cebpa","Cebpb","Cebpg","Ctnnb1","Dbp","Dlx2","Egr2","Elf1","Fos","Fosb","Fosl2","Foxa2","Foxa3","Foxc1","Foxd1","Foxi1","Foxj1","Foxj2","Foxk1","Foxo1","Foxo3","Foxo4","Foxp1","Foxp3","Gata6","Hmga1","Hmga2","Hnf1a","Hnf1b","Hoxa10","Hoxd13","Irf1","Irf2","Irf4","Irf5","Irf6","Irf7","Irf8","Jun","Junb","Jund","Klf2","Lef1","Lhx3","Lhx5","Mafb","Mecom","Meis1","Meox…
GO:0051254	7	positive regulation of RNA metabolic process	103	1532	10.6465	1.68936e-81	7.83393e-80	["Alx4","Arid5a","Atf4","Cdx2","Cebpa","Cebpb","Cebpg","Ctnnb1","Dbp","Dlx2","Egr2","Elf1","Fos","Fosb","Fosl2","Foxa2","Foxa3","Foxc1","Foxd1","Foxi1","Foxj1","Foxj2","Foxk1","Foxo1","Foxo3","Foxo4","Foxp1","Foxp3","Gata6","Hmga1","Hmga2","Hnf1a","Hnf1b","Hoxa10","Hoxd13","Irf1","Irf2","Irf4","Irf5","Irf6","Irf7","Irf8","Jun","Junb","Jund","Klf2","Lef1","Lhx3","Lhx5","Mafb","Mecom","Meis1","Meox…
GO:0010628	7	positive regulation of gene expression	106	1757	12.2101	1.26904e-79	5.75104e-78	["Alx4","Arid5a","Atf4","Cdx2","Cebpa","Cebpb","Cebpg","Ctnnb1","Dbp","Dlx2","Egr2","Elf1","Fos","Fosb","Fosl2","Foxa2","Foxa3","Foxc1","Foxd1","Foxi1","Foxj1","Foxj2","Foxk1","Foxo1","Foxo3","Foxo4","Foxp1","Foxp3","Gata6","Hmga1","Hmga2","Hnf1a","Hnf1b","Hoxa10","Hoxd13","Hoxd3","Irf1","Irf2","Irf4","Irf5","Irf6","Irf7","Irf8","Jun","Junb","Jund","Klf2","Lef1","Lhx3","Lhx5","Mafb","Mecom","Meis…
GO:0010557	7	positive regulation of macromolecule biosynthetic process	103	1674	11.6333	1.47758e-77	6.54732e-76	["Alx4","Arid5a","Atf4","Cdx2","Cebpa","Cebpb","Cebpg","Ctnnb1","Dbp","Dlx2","Egr2","Elf1","Fos","Fosb","Fosl2","Foxa2","Foxa3","Foxc1","Foxd1","Foxi1","Foxj1","Foxj2","Foxk1","Foxo1","Foxo3","Foxo4","Foxp1","Foxp3","Gata6","Hmga1","Hmga2","Hnf1a","Hnf1b","Hoxa10","Hoxd13","Irf1","Irf2","Irf4","Irf5","Irf6","Irf7","Irf8","Jun","Junb","Jund","Klf2","Lef1","Lhx3","Lhx5","Mafb","Mecom","Meis1","Meox…
GO:0044260	4	cellular macromolecule metabolic process	150	6092	42.3357	8.10176e-77	3.51194e-75	["Alx4","Arid5a","Arx","Atf4","Bbx","Bcl6","Cdx2","Cebpa","Cebpb","Cebpg","Ctnnb1","Dbp","Dlx2","E2f6","E4f1","Egr2","Elf1","Fos","Fosb","Fosl2","Foxa2","Foxa3","Foxc1","Foxd1","Foxg1","Foxi1","Foxj1","Foxj2","Foxj3","Foxk1","Foxo1","Foxo3","Foxo4","Foxp1","Foxp3","Gata6","Gfi1b","Gtf2b","Hlf","Hlx","Hmga1","Hmga2","Hnf1a","Hnf1b","Hoxa10","Hoxa9","Hoxb3","Hoxd13","Hoxd3","Irf1","Irf2","Irf3","Ir…
GO:0045935	7	positive regulation of nucleobase-containing compound metabolic process	103	1744	12.1197	9.5955e-76	4.07094e-74	["Alx4","Arid5a","Atf4","Cdx2","Cebpa","Cebpb","Cebpg","Ctnnb1","Dbp","Dlx2","Egr2","Elf1","Fos","Fosb","Fosl2","Foxa2","Foxa3","Foxc1","Foxd1","Foxi1","Foxj1","Foxj2","Foxk1","Foxo1","Foxo3","Foxo4","Foxp1","Foxp3","Gata6","Hmga1","Hmga2","Hnf1a","Hnf1b","Hoxa10","Hoxd13","Irf1","Irf2","Irf4","Irf5","Irf6","Irf7","Irf8","Jun","Junb","Jund","Klf2","Lef1","Lhx3","Lhx5","Mafb","Mecom","Meis1","Meox…
GO:0051173	6	positive regulation of nitrogen compound metabolic process	103	1776	12.3421	6.09073e-75	2.53019e-73	["Alx4","Arid5a","Atf4","Cdx2","Cebpa","Cebpb","Cebpg","Ctnnb1","Dbp","Dlx2","Egr2","Elf1","Fos","Fosb","Fosl2","Foxa2","Foxa3","Foxc1","Foxd1","Foxi1","Foxj1","Foxj2","Foxk1","Foxo1","Foxo3","Foxo4","Foxp1","Foxp3","Gata6","Hmga1","Hmga2","Hnf1a","Hnf1b","Hoxa10","Hoxd13","Irf1","Irf2","Irf4","Irf5","Irf6","Irf7","Irf8","Jun","Junb","Jund","Klf2","Lef1","Lhx3","Lhx5","Mafb","Mecom","Meis1","Meox…
GO:0031328	7	positive regulation of cellular biosynthetic process	103	1824	12.6757	9.1149e-74	3.70921e-72	["Alx4","Arid5a","Atf4","Cdx2","Cebpa","Cebpb","Cebpg","Ctnnb1","Dbp","Dlx2","Egr2","Elf1","Fos","Fosb","Fosl2","Foxa2","Foxa3","Foxc1","Foxd1","Foxi1","Foxj1","Foxj2","Foxk1","Foxo1","Foxo3","Foxo4","Foxp1","Foxp3","Gata6","Hmga1","Hmga2","Hnf1a","Hnf1b","Hoxa10","Hoxd13","Irf1","Irf2","Irf4","Irf5","Irf6","Irf7","Irf8","Jun","Junb","Jund","Klf2","Lef1","Lhx3","Lhx5","Mafb","Mecom","Meis1","Meox…
GO:0009891	6	positive regulation of biosynthetic process	103	1859	12.9189	6.24759e-73	2.49154e-71	["Alx4","Arid5a","Atf4","Cdx2","Cebpa","Cebpb","Cebpg","Ctnnb1","Dbp","Dlx2","Egr2","Elf1","Fos","Fosb","Fosl2","Foxa2","Foxa3","Foxc1","Foxd1","Foxi1","Foxj1","Foxj2","Foxk1","Foxo1","Foxo3","Foxo4","Foxp1","Foxp3","Gata6","Hmga1","Hmga2","Hnf1a","Hnf1b","Hoxa10","Hoxd13","Irf1","Irf2","Irf4","Irf5","Irf6","Irf7","Irf8","Jun","Junb","Jund","Klf2","Lef1","Lhx3","Lhx5","Mafb","Mecom","Meis1","Meox…
GO:0045892	8	negative regulation of transcription, DNA-templated	88	1130	7.85282	1.40083e-72	5.47696e-71	["Arid5a","Arx","Bcl6","Cdx2","Cebpa","Cebpb","Cebpg","Ctnnb1","Dlx1","Dlx2","E2f6","E4f1","Fosb","Foxa2","Foxd1","Foxg1","Foxj1","Foxk1","Foxo1","Foxo3","Foxp1","Foxp3","Gata6","Gfi1b","Hmga1","Hmga2","Hnf1a","Hnf1b","Hoxb3","Irf1","Irf2","Irf3","Irf7","Irf8","Jdp2","Jun","Junb","Jund","Lef1","Lhx9","Mecom","Myb","Nfatc2","Nfatc4","Nfil3","Nfkb1","Nfkb2","Nr1h2","Nr1h3","Nr1i2","Nr1i3","Nr2e1","…
GO:1903507	9	negative regulation of nucleic acid-templated transcription	88	1159	8.05435	1.29974e-71	4.984e-70	["Arid5a","Arx","Bcl6","Cdx2","Cebpa","Cebpb","Cebpg","Ctnnb1","Dlx1","Dlx2","E2f6","E4f1","Fosb","Foxa2","Foxd1","Foxg1","Foxj1","Foxk1","Foxo1","Foxo3","Foxp1","Foxp3","Gata6","Gfi1b","Hmga1","Hmga2","Hnf1a","Hnf1b","Hoxb3","Irf1","Irf2","Irf3","Irf7","Irf8","Jdp2","Jun","Junb","Jund","Lef1","Lhx9","Mecom","Myb","Nfatc2","Nfatc4","Nfil3","Nfkb1","Nfkb2","Nr1h2","Nr1h3","Nr1i2","Nr1i3","Nr2e1","…
GO:1902679	8	negative regulation of RNA biosynthetic process	88	1174	8.15859	4.01802e-71	1.51169e-69	["Arid5a","Arx","Bcl6","Cdx2","Cebpa","Cebpb","Cebpg","Ctnnb1","Dlx1","Dlx2","E2f6","E4f1","Fosb","Foxa2","Foxd1","Foxg1","Foxj1","Foxk1","Foxo1","Foxo3","Foxp1","Foxp3","Gata6","Gfi1b","Hmga1","Hmga2","Hnf1a","Hnf1b","Hoxb3","Irf1","Irf2","Irf3","Irf7","Irf8","Jdp2","Jun","Junb","Jund","Lef1","Lhx9","Mecom","Myb","Nfatc2","Nfatc4","Nfil3","Nfkb1","Nfkb2","Nr1h2","Nr1h3","Nr1i2","Nr1i3","Nr2e1","…
GO:0051253	7	negative regulation of RNA metabolic process	88	1217	8.45741	9.38209e-70	3.46443e-68	["Arid5a","Arx","Bcl6","Cdx2","Cebpa","Cebpb","Cebpg","Ctnnb1","Dlx1","Dlx2","E2f6","E4f1","Fosb","Foxa2","Foxd1","Foxg1","Foxj1","Foxk1","Foxo1","Foxo3","Foxp1","Foxp3","Gata6","Gfi1b","Hmga1","Hmga2","Hnf1a","Hnf1b","Hoxb3","Irf1","Irf2","Irf3","Irf7","Irf8","Jdp2","Jun","Junb","Jund","Lef1","Lhx9","Mecom","Myb","Nfatc2","Nfatc4","Nfil3","Nfkb1","Nfkb2","Nr1h2","Nr1h3","Nr1i2","Nr1i3","Nr2e1","…
GO:0043170	4	macromolecule metabolic process	150	6877	47.791	5.88612e-69	2.13399e-67	["Alx4","Arid5a","Arx","Atf4","Bbx","Bcl6","Cdx2","Cebpa","Cebpb","Cebpg","Ctnnb1","Dbp","Dlx2","E2f6","E4f1","Egr2","Elf1","Fos","Fosb","Fosl2","Foxa2","Foxa3","Foxc1","Foxd1","Foxg1","Foxi1","Foxj1","Foxj2","Foxj3","Foxk1","Foxo1","Foxo3","Foxo4","Foxp1","Foxp3","Gata6","Gfi1b","Gtf2b","Hlf","Hlx","Hmga1","Hmga2","Hnf1a","Hnf1b","Hoxa10","Hoxa9","Hoxb3","Hoxd13","Hoxd3","Irf1","Irf2","Irf3","Ir…
GO:2000113	8	negative regulation of cellular macromolecule biosynthetic process	88	1283	8.91607	9.40711e-68	3.3496e-66	["Arid5a","Arx","Bcl6","Cdx2","Cebpa","Cebpb","Cebpg","Ctnnb1","Dlx1","Dlx2","E2f6","E4f1","Fosb","Foxa2","Foxd1","Foxg1","Foxj1","Foxk1","Foxo1","Foxo3","Foxp1","Foxp3","Gata6","Gfi1b","Hmga1","Hmga2","Hnf1a","Hnf1b","Hoxb3","Irf1","Irf2","Irf3","Irf7","Irf8","Jdp2","Jun","Junb","Jund","Lef1","Lhx9","Mecom","Myb","Nfatc2","Nfatc4","Nfil3","Nfkb1","Nfkb2","Nr1h2","Nr1h3","Nr1i2","Nr1i3","Nr2e1","…
GO:0045934	7	negative regulation of nucleobase-containing compound metabolic process	88	1341	9.31914	4.3828e-66	1.53321e-64	["Arid5a","Arx","Bcl6","Cdx2","Cebpa","Cebpb","Cebpg","Ctnnb1","Dlx1","Dlx2","E2f6","E4f1","Fosb","Foxa2","Foxd1","Foxg1","Foxj1","Foxk1","Foxo1","Foxo3","Foxp1","Foxp3","Gata6","Gfi1b","Hmga1","Hmga2","Hnf1a","Hnf1b","Hoxb3","Irf1","Irf2","Irf3","Irf7","Irf8","Jdp2","Jun","Junb","Jund","Lef1","Lhx9","Mecom","Myb","Nfatc2","Nfatc4","Nfil3","Nfkb1","Nfkb2","Nr1h2","Nr1h3","Nr1i2","Nr1i3","Nr2e1","…
GO:0010558	7	negative regulation of macromolecule biosynthetic process	88	1357	9.43033	1.22512e-65	4.21186e-64	["Arid5a","Arx","Bcl6","Cdx2","Cebpa","Cebpb","Cebpg","Ctnnb1","Dlx1","Dlx2","E2f6","E4f1","Fosb","Foxa2","Foxd1","Foxg1","Foxj1","Foxk1","Foxo1","Foxo3","Foxp1","Foxp3","Gata6","Gfi1b","Hmga1","Hmga2","Hnf1a","Hnf1b","Hoxb3","Irf1","Irf2","Irf3","Irf7","Irf8","Jdp2","Jun","Junb","Jund","Lef1","Lhx9","Mecom","Myb","Nfatc2","Nfatc4","Nfil3","Nfkb1","Nfkb2","Nr1h2","Nr1h3","Nr1i2","Nr1i3","Nr2e1","…
GO:0051172	6	negative regulation of nitrogen compound metabolic process	88	1366	9.49287	2.1716e-65	7.33927e-64	["Arid5a","Arx","Bcl6","Cdx2","Cebpa","Cebpb","Cebpg","Ctnnb1","Dlx1","Dlx2","E2f6","E4f1","Fosb","Foxa2","Foxd1","Foxg1","Foxj1","Foxk1","Foxo1","Foxo3","Foxp1","Foxp3","Gata6","Gfi1b","Hmga1","Hmga2","Hnf1a","Hnf1b","Hoxb3","Irf1","Irf2","Irf3","Irf7","Irf8","Jdp2","Jun","Junb","Jund","Lef1","Lhx9","Mecom","Myb","Nfatc2","Nfatc4","Nfil3","Nfkb1","Nfkb2","Nr1h2","Nr1h3","Nr1i2","Nr1i3","Nr2e1","…
GO:0031327	7	negative regulation of cellular biosynthetic process	88	1421	9.87509	6.5807e-64	2.18699e-62	["Arid5a","Arx","Bcl6","Cdx2","Cebpa","Cebpb","Cebpg","Ctnnb1","Dlx1","Dlx2","E2f6","E4f1","Fosb","Foxa2","Foxd1","Foxg1","Foxj1","Foxk1","Foxo1","Foxo3","Foxp1","Foxp3","Gata6","Gfi1b","Hmga1","Hmga2","Hnf1a","Hnf1b","Hoxb3","Irf1","Irf2","Irf3","Irf7","Irf8","Jdp2","Jun","Junb","Jund","Lef1","Lhx9","Mecom","Myb","Nfatc2","Nfatc4","Nfil3","Nfkb1","Nfkb2","Nr1h2","Nr1h3","Nr1i2","Nr1i3","Nr2e1","…
GO:0009890	6	negative regulation of biosynthetic process	88	1446	10.0488	2.95901e-63	9.67255e-62	["Arid5a","Arx","Bcl6","Cdx2","Cebpa","Cebpb","Cebpg","Ctnnb1","Dlx1","Dlx2","E2f6","E4f1","Fosb","Foxa2","Foxd1","Foxg1","Foxj1","Foxk1","Foxo1","Foxo3","Foxp1","Foxp3","Gata6","Gfi1b","Hmga1","Hmga2","Hnf1a","Hnf1b","Hoxb3","Irf1","Irf2","Irf3","Irf7","Irf8","Jdp2","Jun","Junb","Jund","Lef1","Lhx9","Mecom","Myb","Nfatc2","Nfatc4","Nfil3","Nfkb1","Nfkb2","Nr1h2","Nr1h3","Nr1i2","Nr1i3","Nr2e1","…
GO:0010604	6	positive regulation of macromolecule metabolic process	109	2782	19.3332	1.15495e-62	3.71448e-61	["Alx4","Arid5a","Atf4","Bcl6","Cdx2","Cebpa","Cebpb","Cebpg","Ctnnb1","Dbp","Dlx2","Egr2","Elf1","Fos","Fosb","Fosl2","Foxa2","Foxa3","Foxc1","Foxd1","Foxi1","Foxj1","Foxj2","Foxk1","Foxo1","Foxo3","Foxo4","Foxp1","Foxp3","Gata6","Gfi1b","Hmga1","Hmga2","Hnf1a","Hnf1b","Hoxa10","Hoxd13","Hoxd3","Irf1","Irf2","Irf4","Irf5","Irf6","Irf7","Irf8","Jdp2","Jun","Junb","Jund","Klf2","Lef1","Lhx3","Lhx5…
GO:0010629	7	negative regulation of gene expression	88	1522	10.577	2.41389e-61	7.64016e-60	["Arid5a","Arx","Bcl6","Cdx2","Cebpa","Cebpb","Cebpg","Ctnnb1","Dlx1","Dlx2","E2f6","E4f1","Fosb","Foxa2","Foxd1","Foxg1","Foxj1","Foxk1","Foxo1","Foxo3","Foxp1","Foxp3","Gata6","Gfi1b","Hmga1","Hmga2","Hnf1a","Hnf1b","Hoxb3","Irf1","Irf2","Irf3","Irf7","Irf8","Jdp2","Jun","Junb","Jund","Lef1","Lhx9","Mecom","Myb","Nfatc2","Nfatc4","Nfil3","Nfkb1","Nfkb2","Nr1h2","Nr1h3","Nr1i2","Nr1i3","Nr2e1","…
GO:0000122	9	negative regulation of transcription from RNA polymerase II promoter	70	773	5.37188	2.95913e-60	9.21952e-59	["Arx","Bcl6","Cdx2","Cebpa","Ctnnb1","Dlx1","Dlx2","E2f6","E4f1","Fosb","Foxa2","Foxg1","Foxj1","Foxo1","Foxo3","Foxp1","Foxp3","Gata6","Gfi1b","Hmga2","Hnf1a","Hnf1b","Hoxb3","Irf2","Irf3","Irf7","Irf8","Jdp2","Jun","Junb","Jund","Lef1","Myb","Nfatc2","Nfatc4","Nfil3","Nfkb1","Nfkb2","Nr1h2","Nr1h3","Nr2e1","Nr2f2","Pax6","Pou3f3","Pou5f1","Prdm1","Rara","Rarg","Rela","Relb","Rxra","Sall4","Sho…
GO:0044237	3	cellular metabolic process	150	8016	55.7063	4.56333e-59	1.39989e-57	["Alx4","Arid5a","Arx","Atf4","Bbx","Bcl6","Cdx2","Cebpa","Cebpb","Cebpg","Ctnnb1","Dbp","Dlx2","E2f6","E4f1","Egr2","Elf1","Fos","Fosb","Fosl2","Foxa2","Foxa3","Foxc1","Foxd1","Foxg1","Foxi1","Foxj1","Foxj2","Foxj3","Foxk1","Foxo1","Foxo3","Foxo4","Foxp1","Foxp3","Gata6","Gfi1b","Gtf2b","Hlf","Hlx","Hmga1","Hmga2","Hnf1a","Hnf1b","Hoxa10","Hoxa9","Hoxb3","Hoxd13","Hoxd3","Irf1","Irf2","Irf3","Ir…
GO:0044238	3	primary metabolic process	150	8175	56.8113	8.35876e-58	2.52536e-56	["Alx4","Arid5a","Arx","Atf4","Bbx","Bcl6","Cdx2","Cebpa","Cebpb","Cebpg","Ctnnb1","Dbp","Dlx2","E2f6","E4f1","Egr2","Elf1","Fos","Fosb","Fosl2","Foxa2","Foxa3","Foxc1","Foxd1","Foxg1","Foxi1","Foxj1","Foxj2","Foxj3","Foxk1","Foxo1","Foxo3","Foxo4","Foxp1","Foxp3","Gata6","Gfi1b","Gtf2b","Hlf","Hlx","Hmga1","Hmga2","Hnf1a","Hnf1b","Hoxa10","Hoxa9","Hoxb3","Hoxd13","Hoxd3","Irf1","Irf2","Irf3","Ir…
GO:0031325	6	positive regulation of cellular metabolic process	106	2954	20.5285	2.0684e-56	6.1558e-55	["Alx4","Arid5a","Atf4","Bcl6","Cdx2","Cebpa","Cebpb","Cebpg","Ctnnb1","Dbp","Dlx2","Egr2","Elf1","Fos","Fosb","Fosl2","Foxa2","Foxa3","Foxc1","Foxd1","Foxi1","Foxj1","Foxj2","Foxk1","Foxo1","Foxo3","Foxo4","Foxp1","Foxp3","Gata6","Gfi1b","Hmga1","Hmga2","Hnf1a","Hnf1b","Hoxa10","Hoxd13","Irf1","Irf2","Irf4","Irf5","Irf6","Irf7","Irf8","Jdp2","Jun","Junb","Jund","Klf2","Lef1","Lhx3","Lhx5","Mafb"…
GO:0071704	3	organic substance metabolic process	150	8475	58.8961	1.72357e-55	5.0541e-54	["Alx4","Arid5a","Arx","Atf4","Bbx","Bcl6","Cdx2","Cebpa","Cebpb","Cebpg","Ctnnb1","Dbp","Dlx2","E2f6","E4f1","Egr2","Elf1","Fos","Fosb","Fosl2","Foxa2","Foxa3","Foxc1","Foxd1","Foxg1","Foxi1","Foxj1","Foxj2","Foxj3","Foxk1","Foxo1","Foxo3","Foxo4","Foxp1","Foxp3","Gata6","Gfi1b","Gtf2b","Hlf","Hlx","Hmga1","Hmga2","Hnf1a","Hnf1b","Hoxa10","Hoxa9","Hoxb3","Hoxd13","Hoxd3","Irf1","Irf2","Irf3","Ir…
GO:0009893	5	positive regulation of metabolic process	109	3604	25.0456	4.66662e-51	1.34858e-49	["Alx4","Arid5a","Atf4","Bcl6","Cdx2","Cebpa","Cebpb","Cebpg","Ctnnb1","Dbp","Dlx2","Egr2","Elf1","Fos","Fosb","Fosl2","Foxa2","Foxa3","Foxc1","Foxd1","Foxi1","Foxj1","Foxj2","Foxk1","Foxo1","Foxo3","Foxo4","Foxp1","Foxp3","Gata6","Gfi1b","Hmga1","Hmga2","Hnf1a","Hnf1b","Hoxa10","Hoxd13","Hoxd3","Irf1","Irf2","Irf4","Irf5","Irf6","Irf7","Irf8","Jdp2","Jun","Junb","Jund","Klf2","Lef1","Lhx3","Lhx5…
GO:0030154	5	cell differentiation	90	2197	15.2678	3.90722e-50	1.113e-48	["Arid5a","Arx","Bcl6","Cdx2","Cebpa","Cebpb","Cebpg","Ctnnb1","Dlx1","Dlx2","Egr2","Elf1","Fos","Foxa2","Foxa3","Foxc1","Foxd1","Foxg1","Foxj1","Foxj2","Foxj3","Foxk1","Foxo1","Foxo3","Foxo4","Foxp1","Foxp3","Gata6","Gfi1b","Hlf","Hlx","Hmga2","Hnf1b","Hoxb3","Irf1","Irf4","Irf6","Irf8","Irx5","Jun","Junb","Klf2","Lef1","Lhx3","Lhx5","Mafb","Mecom","Meox1","Mnx1","Myb","Nfatc4","Nfe2l1","Nfkb2",…
GO:0044767	3	single-organism developmental process	121	4956	34.4412	2.46382e-49	6.91951e-48	["Alx4","Arid5a","Arx","Bbx","Bcl6","Cdx2","Cebpa","Cebpb","Cebpg","Ctnnb1","Dbp","Dlx1","Dlx2","E4f1","Egr2","Elf1","Fos","Fosl2","Foxa2","Foxa3","Foxc1","Foxd1","Foxg1","Foxi1","Foxj1","Foxj2","Foxj3","Foxk1","Foxo1","Foxo3","Foxo4","Foxp1","Foxp3","Gata6","Gfi1b","Hlf","Hlx","Hmga1","Hmga2","Hnf1a","Hnf1b","Hoxa10","Hoxa9","Hoxb3","Hoxd13","Hoxd3","Irf1","Irf4","Irf6","Irf8","Irx2","Irx3","Irx…
GO:0048869	4	cellular developmental process	99	2973	20.6605	2.3924e-48	6.62563e-47	["Arid5a","Arx","Bcl6","Cdx2","Cebpa","Cebpb","Cebpg","Ctnnb1","Dlx1","Dlx2","Egr2","Elf1","Fos","Fosl2","Foxa2","Foxa3","Foxc1","Foxd1","Foxg1","Foxj1","Foxj2","Foxj3","Foxk1","Foxo1","Foxo3","Foxo4","Foxp1","Foxp3","Gata6","Gfi1b","Hlf","Hlx","Hmga2","Hnf1b","Hoxb3","Irf1","Irf4","Irf6","Irf8","Irx5","Jun","Junb","Jund","Klf2","Lef1","Lhx3","Lhx5","Mafb","Mecom","Meis1","Meox1","Mnx1","Myb","Nf…
GO:0032502	2	developmental process	123	5346	37.1515	8.87563e-48	2.42438e-46	["Alx4","Arid5a","Arx","Bbx","Bcl6","Cdx2","Cebpa","Cebpb","Cebpg","Ctnnb1","Dbp","Dlx1","Dlx2","E4f1","Egr2","Elf1","Fos","Fosl2","Foxa2","Foxa3","Foxc1","Foxd1","Foxg1","Foxi1","Foxj1","Foxj2","Foxj3","Foxk1","Foxo1","Foxo3","Foxo4","Foxp1","Foxp3","Gata6","Gfi1b","Hlf","Hlx","Hmga1","Hmga2","Hnf1a","Hnf1b","Hoxa10","Hoxa9","Hoxb3","Hoxd13","Hoxd3","Irf1","Irf4","Irf6","Irf8","Irx2","Irx3","Irx…
GO:0008152	2	metabolic process	150	9566	66.4779	9.58449e-48	2.58263e-46	["Alx4","Arid5a","Arx","Atf4","Bbx","Bcl6","Cdx2","Cebpa","Cebpb","Cebpg","Ctnnb1","Dbp","Dlx2","E2f6","E4f1","Egr2","Elf1","Fos","Fosb","Fosl2","Foxa2","Foxa3","Foxc1","Foxd1","Foxg1","Foxi1","Foxj1","Foxj2","Foxj3","Foxk1","Foxo1","Foxo3","Foxo4","Foxp1","Foxp3","Gata6","Gfi1b","Gtf2b","Hlf","Hlx","Hmga1","Hmga2","Hnf1a","Hnf1b","Hoxa10","Hoxa9","Hoxb3","Hoxd13","Hoxd3","Irf1","Irf2","Irf3","Ir…
GO:0050794	4	regulation of cellular process	155	10916	75.8596	1.3524e-47	3.59557e-46	["Alx4","Arid5a","Arx","Atf4","Bbx","Bcl6","Cdx2","Cebpa","Cebpb","Cebpg","Ctnnb1","Dbp","Dlx1","Dlx2","E2f6","E4f1","Egr2","Elf1","Fos","Fosb","Fosl2","Foxa2","Foxa3","Foxc1","Foxd1","Foxg1","Foxi1","Foxj1","Foxj2","Foxj3","Foxk1","Foxo1","Foxo3","Foxo4","Foxp1","Foxp3","Gata6","Gfi1b","Gtf2b","Hlf","Hlx","Hmga1","Hmga2","Hnf1a","Hnf1b","Hoxa10","Hoxa9","Hoxb3","Hoxd13","Hoxd3","Irf1","Irf2","Ir…
GO:0010605	6	negative regulation of macromolecule metabolic process	89	2308	16.0392	3.07214e-47	7.95564e-46	["Arid5a","Arx","Bcl6","Cdx2","Cebpa","Cebpb","Cebpg","Ctnnb1","Dlx1","Dlx2","E2f6","E4f1","Fosb","Foxa2","Foxd1","Foxg1","Foxj1","Foxk1","Foxo1","Foxo3","Foxp1","Foxp3","Gata6","Gfi1b","Hmga1","Hmga2","Hnf1a","Hnf1b","Hoxb3","Irf1","Irf2","Irf3","Irf7","Irf8","Jdp2","Jun","Junb","Jund","Lef1","Lhx9","Mecom","Myb","Nfatc2","Nfatc4","Nfil3","Nfkb1","Nfkb2","Nr1h2","Nr1h3","Nr1i2","Nr1i3","Nr2e1","…
GO:0031324	6	negative regulation of cellular metabolic process	89	2308	16.0392	3.07214e-47	7.95564e-46	["Arid5a","Arx","Bcl6","Cdx2","Cebpa","Cebpb","Cebpg","Ctnnb1","Dlx1","Dlx2","E2f6","E4f1","Fosb","Foxa2","Foxd1","Foxg1","Foxj1","Foxk1","Foxo1","Foxo3","Foxp1","Foxp3","Gata6","Gfi1b","Hmga1","Hmga2","Hnf1a","Hnf1b","Hoxb3","Irf1","Irf2","Irf3","Irf7","Irf8","Jdp2","Jun","Junb","Jund","Lef1","Lhx9","Mecom","Myb","Nfatc2","Nfatc4","Nfil3","Nfkb1","Nfkb2","Nr1h2","Nr1h3","Nr1i2","Nr1i3","Nr2e1","…
GO:0009653	3	anatomical structure morphogenesis	75	1514	10.5214	6.62455e-46	1.69351e-44	["Alx4","Bcl6","Cdx2","Ctnnb1","Dlx1","Dlx2","Foxa2","Foxa3","Foxc1","Foxd1","Foxg1","Foxi1","Foxj1","Foxj2","Foxj3","Foxk1","Foxo1","Foxo3","Foxo4","Foxp1","Foxp3","Gata6","Hlx","Hmga2","Hnf1a","Hnf1b","Hoxa10","Hoxa9","Hoxb3","Hoxd13","Hoxd3","Irx5","Jun","Klf2","Lef1","Lhx3","Lhx9","Mafb","Mecom","Meis1","Mnx1","Nfatc4","Nfe2l1","Nr2e1","Nr2f2","Pax6","Pax7","Pbx1","Pou5f1","Prdm1","Rara","Rar…
GO:0050789	3	regulation of biological process	155	11418	79.3482	1.44444e-44	3.64583e-43	["Alx4","Arid5a","Arx","Atf4","Bbx","Bcl6","Cdx2","Cebpa","Cebpb","Cebpg","Ctnnb1","Dbp","Dlx1","Dlx2","E2f6","E4f1","Egr2","Elf1","Fos","Fosb","Fosl2","Foxa2","Foxa3","Foxc1","Foxd1","Foxg1","Foxi1","Foxj1","Foxj2","Foxj3","Foxk1","Foxo1","Foxo3","Foxo4","Foxp1","Foxp3","Gata6","Gfi1b","Gtf2b","Hlf","Hlx","Hmga1","Hmga2","Hnf1a","Hnf1b","Hoxa10","Hoxa9","Hoxb3","Hoxd13","Hoxd3","Irf1","Irf2","Ir…
GO:0048513	4	organ development	75	1617	11.2372	7.01691e-44	1.74896e-42	["Alx4","Bbx","Cdx2","Cebpa","Cebpb","Cebpg","Ctnnb1","Dbp","Dlx2","Egr2","Foxa2","Foxc1","Foxd1","Foxg1","Foxj1","Foxk1","Foxo4","Foxp1","Gata6","Gfi1b","Hlx","Hmga2","Hnf1a","Hnf1b","Hoxa10","Hoxa9","Hoxb3","Hoxd13","Hoxd3","Irf6","Irx2","Irx3","Irx5","Jun","Junb","Lef1","Lhx3","Lhx9","Mafb","Meis1","Mnx1","Myb","Nfatc4","Nfkb1","Nfkb2","Nr2e1","Pax6","Pax7","Pbx1","Pou2f1","Pou3f3","Pou6f1","P…
GO:0045595	5	regulation of cell differentiation	76	1691	11.7514	1.35958e-43	3.34692e-42	["Bcl6","Cdx2","Cebpa","Cebpb","Ctnnb1","Dlx1","Dlx2","Fos","Foxa2","Foxa3","Foxc1","Foxg1","Foxj1","Foxo1","Foxo3","Foxo4","Foxp1","Foxp3","Gata6","Gfi1b","Hlx","Hmga2","Hnf1b","Hoxa9","Hoxb3","Hoxd3","Irf1","Irf4","Irf7","Irx3","Jdp2","Jun","Junb","Jund","Lef1","Mafb","Mecom","Meis1","Myb","Nfatc2","Nfatc4","Nfkb1","Nr1h2","Nr1h3","Nr2e1","Pax6","Pax7","Pbx1","Pou5f1","Prdm1","Rara","Rarg","Rel…
GO:0048523	5	negative regulation of cellular process	109	4294	29.8407	2.11013e-43	5.13121e-42	["Arid5a","Arx","Atf4","Bcl6","Cdx2","Cebpa","Cebpb","Cebpg","Ctnnb1","Dlx1","Dlx2","E2f6","E4f1","Egr2","Elf1","Fosb","Foxa2","Foxa3","Foxc1","Foxd1","Foxg1","Foxj1","Foxk1","Foxo1","Foxo3","Foxo4","Foxp1","Foxp3","Gata6","Gfi1b","Hlx","Hmga1","Hmga2","Hnf1a","Hnf1b","Hoxa9","Hoxb3","Irf1","Irf2","Irf3","Irf4","Irf6","Irf7","Irf8","Irx3","Jdp2","Jun","Junb","Jund","Lef1","Lhx3","Lhx9","Mafb","Me…
GO:0048856	3	anatomical structure development	99	3413	23.7183	7.03082e-43	1.68909e-41	["Alx4","Arx","Bbx","Bcl6","Cdx2","Cebpa","Cebpb","Cebpg","Ctnnb1","Dbp","Dlx1","Dlx2","E4f1","Egr2","Fos","Fosl2","Foxa2","Foxa3","Foxc1","Foxd1","Foxg1","Foxi1","Foxj1","Foxk1","Foxo1","Foxo4","Foxp1","Gata6","Gfi1b","Hlx","Hmga2","Hnf1a","Hnf1b","Hoxa10","Hoxa9","Hoxb3","Hoxd13","Hoxd3","Irf6","Irx2","Irx3","Irx5","Jun","Junb","Jund","Klf2","Lef1","Lhx3","Lhx5","Lhx9","Mafb","Mafk","Mecom","Me…
GO:0048522	5	positive regulation of cellular process	113	4765	33.1139	7.98427e-43	1.89531e-41	["Alx4","Arid5a","Atf4","Bcl6","Cdx2","Cebpa","Cebpb","Cebpg","Ctnnb1","Dbp","Dlx2","Egr2","Elf1","Fos","Fosb","Fosl2","Foxa2","Foxa3","Foxc1","Foxd1","Foxg1","Foxi1","Foxj1","Foxj2","Foxk1","Foxo1","Foxo3","Foxo4","Foxp1","Foxp3","Gata6","Gfi1b","Hlx","Hmga1","Hmga2","Hnf1a","Hnf1b","Hoxa10","Hoxd13","Hoxd3","Irf1","Irf2","Irf3","Irf4","Irf5","Irf6","Irf7","Irf8","Irx3","Jdp2","Jun","Junb","Jund…
GO:0009892	5	negative regulation of metabolic process	89	2639	18.3395	1.93126e-42	4.5305e-41	["Arid5a","Arx","Bcl6","Cdx2","Cebpa","Cebpb","Cebpg","Ctnnb1","Dlx1","Dlx2","E2f6","E4f1","Fosb","Foxa2","Foxd1","Foxg1","Foxj1","Foxk1","Foxo1","Foxo3","Foxp1","Foxp3","Gata6","Gfi1b","Hmga1","Hmga2","Hnf1a","Hnf1b","Hoxb3","Irf1","Irf2","Irf3","Irf7","Irf8","Jdp2","Jun","Junb","Jund","Lef1","Lhx9","Mecom","Myb","Nfatc2","Nfatc4","Nfil3","Nfkb1","Nfkb2","Nr1h2","Nr1h3","Nr1i2","Nr1i3","Nr2e1","…
GO:0050793	4	regulation of developmental process	85	2374	16.4979	4.739e-42	1.09879e-40	["Arx","Bcl6","Cdx2","Cebpa","Cebpb","Ctnnb1","Dlx1","Dlx2","E4f1","Fos","Foxa2","Foxa3","Foxc1","Foxd1","Foxg1","Foxj1","Foxo1","Foxo3","Foxo4","Foxp1","Foxp3","Gata6","Gfi1b","Hlx","Hmga1","Hmga2","Hnf1b","Hoxa9","Hoxb3","Hoxd13","Hoxd3","Irf1","Irf4","Irf7","Irx3","Jdp2","Jun","Junb","Jund","Lef1","Mafb","Mecom","Meis1","Myb","Nfatc2","Nfatc4","Nfkb1","Nr1h2","Nr1h3","Nr2e1","Pax6","Pax7","Pbx…
GO:0065007	2	biological regulation	155	11898	82.6839	8.53327e-42	1.95579e-40	["Alx4","Arid5a","Arx","Atf4","Bbx","Bcl6","Cdx2","Cebpa","Cebpb","Cebpg","Ctnnb1","Dbp","Dlx1","Dlx2","E2f6","E4f1","Egr2","Elf1","Fos","Fosb","Fosl2","Foxa2","Foxa3","Foxc1","Foxd1","Foxg1","Foxi1","Foxj1","Foxj2","Foxj3","Foxk1","Foxo1","Foxo3","Foxo4","Foxp1","Foxp3","Gata6","Gfi1b","Gtf2b","Hlf","Hlx","Hmga1","Hmga2","Hnf1a","Hnf1b","Hoxa10","Hoxa9","Hoxb3","Hoxd13","Hoxd3","Irf1","Irf2","Ir…
GO:0051239	4	regulation of multicellular organismal process	88	2641	18.3533	2.08511e-41	4.72468e-40	["Arx","Atf4","Bcl6","Cebpa","Cebpb","Cebpg","Ctnnb1","Dlx1","Dlx2","E4f1","Egr2","Elf1","Fos","Foxa2","Foxa3","Foxc1","Foxd1","Foxg1","Foxj1","Foxo1","Foxo3","Foxo4","Foxp1","Foxp3","Gata6","Gfi1b","Hlx","Hmga2","Hnf1b","Hoxa9","Hoxb3","Hoxd13","Hoxd3","Irf1","Irf3","Irf4","Irf5","Irf7","Irf8","Irx3","Irx5","Jun","Jund","Klf2","Lef1","Mafb","Meis1","Myb","Nfatc4","Nfkb1","Nfkb2","Nr1h2","Nr1h3",…
GO:0048519	4	negative regulation of biological process	110	4697	32.6413	1.63026e-40	3.65251e-39	["Arid5a","Arx","Atf4","Bcl6","Cdx2","Cebpa","Cebpb","Cebpg","Ctnnb1","Dlx1","Dlx2","E2f6","E4f1","Egr2","Elf1","Fosb","Foxa2","Foxa3","Foxc1","Foxd1","Foxg1","Foxj1","Foxk1","Foxo1","Foxo3","Foxo4","Foxp1","Foxp3","Gata6","Gfi1b","Hlx","Hmga1","Hmga2","Hnf1a","Hnf1b","Hoxa9","Hoxb3","Irf1","Irf2","Irf3","Irf4","Irf6","Irf7","Irf8","Irx3","Jdp2","Jun","Junb","Jund","Klf2","Lef1","Lhx3","Lhx9","Ma…
GO:0048518	4	positive regulation of biological process	115	5484	38.1105	1.77036e-38	3.92233e-37	["Alx4","Arid5a","Arx","Atf4","Bcl6","Cdx2","Cebpa","Cebpb","Cebpg","Ctnnb1","Dbp","Dlx2","Egr2","Elf1","Fos","Fosb","Fosl2","Foxa2","Foxa3","Foxc1","Foxd1","Foxg1","Foxi1","Foxj1","Foxj2","Foxk1","Foxo1","Foxo3","Foxo4","Foxp1","Foxp3","Gata6","Gfi1b","Hlx","Hmga1","Hmga2","Hnf1a","Hnf1b","Hoxa10","Hoxd13","Hoxd3","Irf1","Irf2","Irf3","Irf4","Irf5","Irf6","Irf7","Irf8","Irx3","Jdp2","Jun","Junb"…
GO:2000026	5	regulation of multicellular organismal development	69	1742	12.1058	1.88117e-35	4.12203e-34	["Bcl6","Cebpb","Ctnnb1","Dlx1","Dlx2","E4f1","Fos","Foxa2","Foxa3","Foxc1","Foxd1","Foxg1","Foxj1","Foxo3","Foxo4","Foxp1","Foxp3","Gata6","Gfi1b","Hlx","Hmga2","Hnf1b","Hoxa9","Hoxb3","Hoxd13","Hoxd3","Irf1","Irf4","Irf7","Irx3","Jun","Lef1","Mafb","Meis1","Myb","Nfatc4","Nr2e1","Pax6","Pbx1","Pou5f1","Prdm1","Rara","Rarg","Rela","Rxra","Rxrb","Shox2","Six1","Sox10","Sox11","Sox13","Sox17","Sox…
GO:0045596	6	negative regulation of cell differentiation	49	753	5.23289	4.25689e-34	9.22634e-33	["Bcl6","Cdx2","Ctnnb1","Dlx1","Dlx2","Foxa2","Foxc1","Foxg1","Foxj1","Foxo1","Foxo3","Foxo4","Foxp1","Foxp3","Hlx","Hmga2","Hnf1b","Hoxa9","Irf1","Irx3","Jdp2","Mafb","Mecom","Meis1","Nfatc4","Nr1h2","Nr1h3","Nr2e1","Pax6","Pbx1","Pou5f1","Rara","Rarg","Sall4","Sox11","Sox17","Sox21","Sox8","Sox9","Stat3","Stat5a","Stat5b","Tbx3","Tbx5","Tcf7l2","Trp53","Trp73","Zfp35","Zfp536"]
GO:0009987	2	cellular process	153	12806	88.9939	1.75961e-33	3.77276e-32	["Alx4","Arid5a","Arx","Atf4","Bbx","Bcl6","Cdx2","Cebpa","Cebpb","Cebpg","Ctnnb1","Dbp","Dlx1","Dlx2","E2f6","E4f1","Egr2","Elf1","Fos","Fosb","Fosl2","Foxa2","Foxa3","Foxc1","Foxd1","Foxg1","Foxi1","Foxj1","Foxj2","Foxj3","Foxk1","Foxo1","Foxo3","Foxo4","Foxp1","Foxp3","Gata6","Gfi1b","Gtf2b","Hlf","Hlx","Hmga1","Hmga2","Hnf1a","Hnf1b","Hoxa10","Hoxa9","Hoxb3","Hoxd13","Hoxd3","Irf1","Irf2","Ir…
GO:0051093	5	negative regulation of developmental process	52	959	6.66447	2.12516e-32	4.50805e-31	["Bcl6","Cdx2","Ctnnb1","Dlx1","Dlx2","Foxa2","Foxc1","Foxg1","Foxj1","Foxo1","Foxo3","Foxo4","Foxp1","Foxp3","Hlx","Hmga2","Hnf1b","Hoxa9","Irf1","Irx3","Jdp2","Lef1","Mafb","Mecom","Meis1","Nfatc4","Nr1h2","Nr1h3","Nr2e1","Pax6","Pbx1","Pou5f1","Rara","Rarg","Sall4","Six1","Sox11","Sox17","Sox21","Sox8","Sox9","Stat3","Stat5a","Stat5b","Tbx2","Tbx3","Tbx5","Tcf7l2","Trp53","Trp73","Zfp35","Zfp5…
GO:0042127	5	regulation of cell proliferation	61	1591	11.0565	4.87592e-30	1.02343e-28	["Arx","Bcl6","Cdx2","Cebpa","Cebpb","Ctnnb1","Fosb","Fosl2","Foxa3","Foxg1","Foxj1","Foxo1","Foxo3","Foxo4","Foxp1","Foxp3","Gata6","Hlx","Hmga1","Hmga2","Hoxd13","Irf1","Irf6","Jun","Junb","Jund","Lef1","Lhx5","Mecom","Nfatc2","Nr2e1","Nr2f2","Nr4a1","Pax6","Pax7","Pbx1","Pou3f3","Prdm1","Rara","Rarg","Rela","Rxra","Shox2","Six1","Sox10","Sox11","Sox17","Sox8","Sox9","Stat3","Stat5a","Stat5b","…
GO:0007389	4	pattern specification process	36	416	2.89095	3.88009e-29	8.05927e-28	["Alx4","Cdx2","Ctnnb1","Dlx1","Dlx2","Egr2","Foxa2","Foxc1","Foxd1","Foxg1","Foxj1","Hnf1b","Hoxa10","Hoxa9","Hoxb3","Hoxd13","Hoxd3","Irx2","Irx3","Lef1","Lhx3","Mafb","Meox1","Mnx1","Nfatc4","Nr2f2","Pax6","Pax7","Pbx1","Rarg","Six1","Sox17","Tbx3","Tbx5","Trp53","Uncx"]
GO:0048732	4	gland development	33	328	2.2794	7.65497e-29	1.57361e-27	["Cebpa","Cebpb","Cebpg","Ctnnb1","Dbp","Foxc1","Gata6","Hlx","Hmga2","Hnf1a","Hnf1b","Hoxa9","Hoxb3","Hoxd3","Jun","Lef1","Lhx3","Mafb","Myb","Pax6","Pbx1","Pou2f1","Rara","Rarg","Rela","Rxra","Six1","Sox10","Sox9","Stat5a","Stat5b","Tbx3","Tcf7l2"]
GO:0003002	5	regionalization	31	277	1.92498	1.52821e-28	3.10943e-27	["Alx4","Cdx2","Ctnnb1","Dlx1","Dlx2","Egr2","Foxa2","Foxc1","Foxd1","Foxg1","Foxj1","Hnf1b","Hoxa10","Hoxa9","Hoxb3","Hoxd13","Hoxd3","Irx2","Irx3","Lef1","Lhx3","Mafb","Mnx1","Nr2f2","Pax6","Pax7","Pbx1","Rarg","Sox17","Tbx3","Trp53"]
GO:0051094	5	positive regulation of developmental process	53	1241	8.6242	5.58349e-28	1.12459e-26	["Arx","Bcl6","Cdx2","Cebpa","Cebpb","Ctnnb1","Fos","Foxa2","Foxa3","Foxc1","Foxd1","Foxg1","Foxj1","Foxo3","Foxp1","Foxp3","Gata6","Gfi1b","Hlx","Hmga1","Hmga2","Hoxd3","Irf1","Irx3","Jun","Junb","Jund","Lef1","Mecom","Myb","Nfatc2","Nfkb1","Nr2e1","Pax6","Prdm1","Rara","Rela","Shox2","Six1","Sox10","Sox11","Sox17","Sox5","Sox6","Sox8","Sox9","Stat5a","Stat5b","Stat6","Tbx2","Tbx5","Trp53","Trp7…
GO:0051240	5	positive regulation of multicellular organismal process	57	1505	10.4588	1.3684e-27	2.72858e-26	["Arx","Atf4","Bcl6","Cebpa","Cebpb","Cebpg","Ctnnb1","Fos","Foxa2","Foxa3","Foxc1","Foxd1","Foxg1","Foxj1","Foxo3","Foxp1","Foxp3","Gata6","Gfi1b","Hlx","Hmga2","Hoxd3","Irf1","Irf3","Irf4","Irf5","Irf7","Irf8","Irx3","Jun","Jund","Lef1","Myb","Nfatc4","Nfkb1","Nfkb2","Nr1h2","Nr2e1","Pax6","Prdm1","Rara","Rela","Shox2","Six1","Sox10","Sox11","Sox17","Sox5","Sox6","Sox8","Sox9","Stat5a","Stat5b"…
GO:0051241	5	negative regulation of multicellular organismal process	49	1067	7.415	3.88752e-27	7.67496e-26	["Bcl6","Ctnnb1","Dlx1","Dlx2","Foxa2","Foxc1","Foxg1","Foxj1","Foxo4","Foxp1","Foxp3","Gata6","Hlx","Hmga2","Hnf1b","Hoxa9","Irf1","Irf3","Irx3","Klf2","Lef1","Mafb","Meis1","Nfatc4","Nfkb1","Nr1h3","Nr2e1","Nr2f2","Pax6","Pbx1","Rara","Rarg","Relb","Six1","Sox11","Sox17","Sox21","Sox8","Sox9","Stat3","Stat5a","Stat5b","Tbx2","Tbx5","Tcf7l2","Trp53","Trp73","Zfp35","Zfp536"]
GO:0045597	6	positive regulation of cell differentiation	44	909	6.317	3.6562e-25	7.14751e-24	["Bcl6","Cdx2","Cebpa","Cebpb","Ctnnb1","Fos","Foxa2","Foxa3","Foxc1","Foxg1","Foxj1","Foxo3","Foxp1","Foxp3","Gata6","Gfi1b","Hlx","Hoxd3","Irf1","Irx3","Jun","Junb","Jund","Lef1","Mecom","Myb","Nfatc2","Nfkb1","Pax6","Prdm1","Rara","Rela","Shox2","Sox10","Sox11","Sox17","Sox5","Sox6","Sox8","Sox9","Stat5a","Stat5b","Tbx5","Trp73"]
GO:0048598	4	embryonic morphogenesis	33	456	3.16892	3.25904e-24	6.30925e-23	["Alx4","Ctnnb1","Dlx2","Foxg1","Foxi1","Hlx","Hnf1a","Hnf1b","Hoxa10","Hoxa9","Hoxb3","Hoxd13","Hoxd3","Irx5","Lef1","Mafb","Mecom","Pax6","Pbx1","Rarg","Sall4","Shox2","Six1","Sox11","Sox17","Sox9","Tbx15","Tbx2","Tbx3","Tbx5","Tcf7","Tcf7l2","Trp53"]
GO:0032501	2	multicellular organismal process	91	4894	34.0103	3.94935e-23	7.57212e-22	["Alx4","Arx","Atf4","Cdx2","Cebpa","Ctnnb1","Dlx1","Dlx2","Egr2","Fos","Fosb","Fosl2","Foxa2","Foxa3","Foxc1","Foxd1","Foxg1","Foxj1","Foxk1","Foxo1","Foxo3","Foxo4","Foxp3","Gata6","Gfi1b","Hlf","Hlx","Hmga2","Hnf1a","Hnf1b","Hoxa10","Hoxa9","Hoxb3","Hoxd13","Hoxd3","Irf1","Irf2","Irf7","Irx2","Irx3","Irx5","Jun","Junb","Klf2","Lef1","Lhx3","Mafb","Mafk","Mecom","Meis1","Meox1","Mnx1","Myb","Nf…
GO:0009887	4	organ morphogenesis	34	548	3.80827	8.88578e-23	1.68745e-21	["Alx4","Cdx2","Ctnnb1","Dlx1","Dlx2","Foxc1","Gata6","Hlx","Hnf1b","Hoxb3","Hoxd13","Hoxd3","Irx5","Lef1","Lhx3","Lhx9","Pax6","Pax7","Pbx1","Rarg","Rela","Rxra","Shox2","Six1","Sox11","Sox8","Sox9","Stat6","Tbx15","Tbx2","Tbx3","Tcf7","Tcf7l2","Zfp422"]
GO:0007275	4	multicellular organismal development	45	1123	7.80417	2.07881e-22	3.91053e-21	["Alx4","Arx","Cdx2","Cebpa","Dlx1","Dlx2","Foxa2","Foxa3","Foxd1","Foxg1","Foxk1","Foxo4","Gfi1b","Hlf","Hlx","Hmga2","Hoxa10","Hoxa9","Hoxb3","Hoxd13","Hoxd3","Irx3","Lhx3","Mecom","Meis1","Meox1","Nr2e1","Pax6","Pax7","Pbx1","Pou3f3","Pou5f1","Prdm1","Shox2","Six1","Sox11","Sox6","Tbx2","Tbx22","Tbx3","Tbx5","Trp53","Uncx","Zfp35","Zfp39"]
GO:0044707	3	single-multicellular organism process	88	4823	33.5169	1.68465e-21	3.13942e-20	["Alx4","Arx","Atf4","Cdx2","Cebpa","Ctnnb1","Dlx1","Dlx2","Egr2","Fos","Fosl2","Foxa2","Foxa3","Foxc1","Foxd1","Foxg1","Foxj1","Foxk1","Foxo1","Foxo3","Foxo4","Foxp3","Gata6","Gfi1b","Hlf","Hlx","Hmga2","Hnf1a","Hnf1b","Hoxa10","Hoxa9","Hoxb3","Hoxd13","Hoxd3","Irf1","Irf2","Irf7","Irx2","Irx3","Irx5","Jun","Klf2","Lef1","Lhx3","Mafb","Mafk","Mecom","Meis1","Meox1","Mnx1","Myb","Nfatc2","Nfatc4"…
GO:0045165	5	cell fate commitment	21	162	1.1258	6.64337e-21	1.22656e-19	["Arx","Ctnnb1","Dlx1","Dlx2","Foxp3","Irf4","Nr2e1","Pax6","Pax7","Pou5f1","Prdm1","Rara","Sox12","Sox5","Sox6","Sox8","Sox9","Stat6","Tbx3","Tcf7l2","Trp53"]
GO:1903706	5	regulation of hemopoiesis	27	349	2.42534	1.2307e-20	2.25139e-19	["Bcl6","Cebpb","Ctnnb1","Fos","Foxc1","Foxj1","Foxo3","Foxp1","Foxp3","Gfi1b","Hlx","Hoxa9","Irf1","Irf4","Irf7","Jun","Lef1","Mafb","Meis1","Myb","Prdm1","Rara","Rarg","Sox13","Stat5a","Stat5b","Zfp35"]
GO:0022414	2	reproductive process	45	1355	9.41643	3.47077e-19	6.29157e-18	["Bcl6","Cdx2","Cebpa","Cebpb","Ctnnb1","Fos","Fosb","Fosl2","Foxa3","Foxc1","Foxj1","Foxo3","Gata6","Hmga1","Hmga2","Hnf1a","Hnf1b","Hoxa10","Hoxa9","Hoxd13","Irf1","Irx5","Junb","Lhx3","Lhx9","Nr2f2","Pbx1","Prdm1","Rara","Rarg","Rxra","Rxrb","Sox17","Sox30","Sox8","Sox9","Stat3","Stat5a","Stat5b","Tbp","Tbx3","Tcf7","Tcf7l2","Zfp35","Zfp39"]
GO:0008284	6	positive regulation of cell proliferation	37	880	6.11547	4.89983e-19	8.80204e-18	["Bcl6","Cdx2","Ctnnb1","Fosb","Fosl2","Foxg1","Foxp1","Foxp3","Gata6","Hlx","Hmga2","Jun","Lef1","Nfatc2","Nr2e1","Nr4a1","Pax6","Pax7","Pbx1","Pou3f3","Rara","Rarg","Rela","Shox2","Six1","Sox10","Sox11","Sox8","Sox9","Stat3","Stat5a","Stat5b","Tbx2","Tbx3","Tbx5","Tcf7l2","Zfp143"]
GO:0009888	4	tissue development	35	781	5.42748	7.0463e-19	1.25449e-17	["Ctnnb1","Foxa2","Foxc1","Foxd1","Foxj1","Foxp1","Gata6","Hlx","Hmga2","Hnf1b","Irx3","Junb","Mecom","Meox1","Nr2e1","Nr2f2","Pax6","Pax7","Pou3f3","Rara","Rarg","Rxra","Sall4","Six1","Sox11","Sox17","Sox8","Sox9","Stat5a","Stat5b","Tbx2","Tbx3","Tbx5","Tcf7","Tcf7l2"]
GO:1902105	6	regulation of leukocyte differentiation	22	258	1.79294	7.37126e-18	1.30073e-16	["Bcl6","Cebpb","Ctnnb1","Fos","Foxj1","Foxp1","Foxp3","Gfi1b","Hlx","Irf1","Irf4","Irf7","Jun","Lef1","Mafb","Myb","Prdm1","Rara","Sox13","Stat5a","Stat5b","Zfp35"]
GO:0048608	4	reproductive structure development	24	332	2.3072	9.65381e-18	1.68857e-16	["Cdx2","Cebpb","Ctnnb1","Foxc1","Gata6","Hmga2","Hnf1a","Hnf1b","Hoxa10","Hoxa9","Hoxd13","Irx5","Junb","Lhx3","Lhx9","Nr2f2","Prdm1","Rara","Rarg","Rxra","Rxrb","Sox8","Sox9","Tbx3"]
GO:0010721	7	negative regulation of cell development	23	304	2.11262	1.79026e-17	3.10416e-16	["Ctnnb1","Dlx1","Dlx2","Foxa2","Foxc1","Foxg1","Hmga2","Hnf1b","Irx3","Meis1","Nfatc4","Nr2e1","Pax6","Pbx1","Sox11","Sox21","Sox8","Sox9","Stat3","Tbx5","Trp53","Trp73","Zfp536"]
GO:0051960	6	regulation of nervous system development	34	812	5.64291	1.91157e-17	3.28592e-16	["Bcl6","Ctnnb1","Dlx1","Dlx2","Foxa2","Foxg1","Gfi1b","Hmga2","Hoxb3","Hoxd3","Irx3","Meis1","Nfatc4","Nr2e1","Pax6","Pbx1","Rara","Rarg","Rela","Rxra","Rxrb","Shox2","Six1","Sox10","Sox11","Sox21","Sox5","Sox8","Sox9","Stat3","Tcf7l2","Trp53","Trp73","Zfp536"]
GO:0060284	6	regulation of cell development	35	893	6.20581	4.6076e-17	7.85262e-16	["Bcl6","Ctnnb1","Dlx1","Dlx2","Foxa2","Foxc1","Foxg1","Gfi1b","Hmga2","Hnf1b","Hoxb3","Hoxd3","Irx3","Lef1","Meis1","Nfatc4","Nr2e1","Pax6","Pbx1","Rara","Rela","Shox2","Six1","Sox10","Sox11","Sox21","Sox5","Sox8","Sox9","Stat3","Tbx5","Tcf7l2","Trp53","Trp73","Zfp536"]
GO:0060548	6	negative regulation of cell death	37	1017	7.06753	5.50528e-17	9.30299e-16	["Atf4","Bcl6","Cebpb","Ctnnb1","Dlx1","Egr2","Foxc1","Foxo1","Foxp1","Gata6","Hmga2","Hnf1b","Irf7","Jun","Lef1","Lhx3","Mecom","Nfkb1","Nr2e1","Nr4a1","Pax7","Pou3f3","Rara","Rarg","Rela","Six1","Sox10","Sox11","Sox8","Sox9","Stat3","Stat5a","Stat5b","Tbx3","Tcf7l2","Trp53","Trp73"]
GO:0002682	4	regulation of immune system process	43	1428	9.92373	9.49053e-17	1.59026e-15	["Bcl6","Cebpb","Ctnnb1","Elf1","Fos","Foxc1","Foxj1","Foxo1","Foxo3","Foxo4","Foxp1","Foxp3","Gfi1b","Hlx","Hoxa9","Irf1","Irf3","Irf4","Irf7","Jun","Lef1","Mafb","Meis1","Myb","Nfatc2","Nfkb1","Nfkb2","Nr1h2","Nr1h3","Nr4a1","Prdm1","Rara","Rarg","Rela","Relb","Sox11","Sox13","Sox9","Stat5a","Stat5b","Stat6","Trp53","Zfp35"]
GO:0048562	5	embryonic organ morphogenesis	17	139	0.965966	1.11929e-16	1.85988e-15	["Alx4","Ctnnb1","Dlx2","Hlx","Hnf1b","Hoxb3","Hoxd3","Irx5","Pax6","Rarg","Shox2","Six1","Sox11","Tbx15","Tbx2","Tcf7","Tcf7l2"]
GO:0010941	5	regulation of cell death	46	1662	11.5499	1.4966e-16	2.4663e-15	["Alx4","Atf4","Bcl6","Cebpb","Ctnnb1","Dlx1","Egr2","Foxc1","Foxo1","Foxo3","Foxp1","Gata6","Hmga2","Hnf1b","Irf1","Irf5","Irf7","Jun","Junb","Jund","Lef1","Lhx3","Mecom","Nfatc4","Nfkb1","Nr2e1","Nr4a1","Pax7","Pou3f3","Rara","Rarg","Rela","Rxra","Six1","Sox10","Sox11","Sox8","Sox9","Stat3","Stat5a","Stat5b","Tbx3","Tbx5","Tcf7l2","Trp53","Trp73"]
GO:0043069	7	negative regulation of programmed cell death	35	938	6.51853	2.08231e-16	3.40337e-15	["Bcl6","Cebpb","Ctnnb1","Dlx1","Egr2","Foxc1","Foxo1","Foxp1","Gata6","Hmga2","Hnf1b","Irf7","Jun","Lef1","Lhx3","Mecom","Nfkb1","Nr2e1","Nr4a1","Pax7","Pou3f3","Rara","Rarg","Rela","Six1","Sox10","Sox8","Sox9","Stat3","Stat5a","Stat5b","Tbx3","Tcf7l2","Trp53","Trp73"]
GO:0050767	7	regulation of neurogenesis	31	715	4.96882	2.36066e-16	3.82696e-15	["Bcl6","Ctnnb1","Dlx1","Dlx2","Foxa2","Foxg1","Gfi1b","Hmga2","Hoxb3","Hoxd3","Irx3","Meis1","Nfatc4","Nr2e1","Pax6","Pbx1","Rara","Rela","Shox2","Six1","Sox10","Sox11","Sox21","Sox5","Sox8","Sox9","Stat3","Tcf7l2","Trp53","Trp73","Zfp536"]
GO:0003006	3	developmental process involved in reproduction	31	730	5.07306	4.19094e-16	6.7393e-15	["Cdx2","Cebpa","Cebpb","Ctnnb1","Foxc1","Foxo3","Gata6","Hmga2","Hnf1a","Hnf1b","Hoxa10","Hoxa9","Hoxd13","Irx5","Junb","Lhx3","Lhx9","Nr2f2","Pbx1","Prdm1","Rara","Rarg","Rxra","Rxrb","Sox8","Sox9","Stat5a","Stat5b","Tbx3","Tcf7","Tcf7l2"]
GO:0050768	7	negative regulation of neurogenesis	20	244	1.69565	5.48256e-16	8.74578e-15	["Ctnnb1","Dlx1","Dlx2","Foxa2","Foxg1","Hmga2","Irx3","Meis1","Nfatc4","Nr2e1","Pax6","Pbx1","Sox11","Sox21","Sox8","Sox9","Stat3","Trp53","Trp73","Zfp536"]
GO:0044702	3	single organism reproductive process	38	1175	8.16554	8.97116e-16	1.41972e-14	["Bcl6","Cdx2","Cebpa","Cebpb","Ctnnb1","Foxa3","Foxc1","Foxj1","Foxo3","Gata6","Hmga1","Hmga2","Hnf1a","Hnf1b","Hoxa10","Hoxa9","Hoxd13","Irx5","Junb","Lhx3","Lhx9","Nr2f2","Prdm1","Rara","Rarg","Rxra","Rxrb","Sox17","Sox30","Sox8","Sox9","Stat5a","Tbp","Tbx3","Tcf7","Tcf7l2","Zfp35","Zfp39"]
GO:0043066	8	negative regulation of apoptotic process	34	926	6.43514	9.72804e-16	1.52738e-14	["Bcl6","Cebpb","Ctnnb1","Dlx1","Egr2","Foxc1","Foxo1","Foxp1","Gata6","Hmga2","Hnf1b","Irf7","Jun","Lef1","Lhx3","Nfkb1","Nr2e1","Nr4a1","Pax7","Pou3f3","Rara","Rarg","Rela","Six1","Sox10","Sox8","Sox9","Stat3","Stat5a","Stat5b","Tbx3","Tcf7l2","Trp53","Trp73"]
GO:0001817	5	regulation of cytokine production	27	558	3.87776	1.78222e-15	2.77637e-14	["Atf4","Bcl6","Cebpb","Cebpg","Ctnnb1","Elf1","Foxj1","Foxp1","Foxp3","Gata6","Irf1","Irf3","Irf4","Irf5","Irf7","Irf8","Klf2","Lef1","Nfatc4","Nfkb1","Nfkb2","Rara","Rela","Relb","Stat5a","Stat5b","Stat6"]
GO:0051961	6	negative regulation of nervous system development	20	266	1.84854	2.90132e-15	4.47646e-14	["Ctnnb1","Dlx1","Dlx2","Foxa2","Foxg1","Hmga2","Irx3","Meis1","Nfatc4","Nr2e1","Pax6","Pbx1","Sox11","Sox21","Sox8","Sox9","Stat3","Trp53","Trp73","Zfp536"]
GO:0002683	5	negative regulation of immune system process	23	384	2.66857	2.91845e-15	4.47646e-14	["Bcl6","Cebpb","Ctnnb1","Elf1","Foxj1","Foxp3","Hlx","Hoxa9","Irf1","Irf3","Irf4","Mafb","Meis1","Nr1h2","Nr1h3","Prdm1","Rara","Sox11","Sox9","Stat5a","Stat5b","Stat6","Zfp35"]
GO:0009952	6	anterior/posterior pattern specification	17	170	1.1814	3.46417e-15	5.27294e-14	["Alx4","Cdx2","Foxa2","Foxc1","Hnf1b","Hoxa10","Hoxa9","Hoxb3","Hoxd13","Hoxd3","Lef1","Nr2f2","Pax6","Pbx1","Rarg","Sox17","Trp53"]
GO:0034097	5	response to cytokine	24	431	2.99519	3.50627e-15	5.29659e-14	["Ctnnb1","Fos","Fosl2","Foxa2","Irf1","Jun","Junb","Jund","Klf2","Lef1","Myb","Nfil3","Nfkb1","Nfkb2","Pou5f1","Rara","Rela","Relb","Sox9","Stat3","Stat5a","Stat5b","Stat6","Tcf7"]
GO:0048731	4	system development	34	989	6.87295	6.71006e-15	1.006e-13	["Alx4","Arx","Ctnnb1","Dlx1","Dlx2","Egr2","Fos","Foxc1","Foxp1","Hlx","Hnf1b","Hoxa10","Hoxa9","Hoxd13","Lef1","Mafk","Mecom","Mnx1","Nr2e1","Pax6","Pax7","Pbx1","Pou3f3","Shox2","Six1","Sox10","Sox11","Sox17","Sox8","Sox9","Stat3","Tbx3","Trp53","Uncx"]
GO:0043401	7	steroid hormone mediated signaling pathway	12	59	0.410014	6.98112e-15	1.03883e-13	["Lef1","Nr1h2","Nr1h3","Nr1i2","Nr1i3","Nr2e1","Nr2f2","Nr4a1","Rara","Rarg","Rxra","Rxrb"]
GO:0009755	6	hormone-mediated signaling pathway	14	99	0.68799	7.74402e-15	1.14382e-13	["Lef1","Nr1h2","Nr1h3","Nr1i2","Nr1i3","Nr2e1","Nr2f2","Nr4a1","Rara","Rarg","Rxra","Rxrb","Stat5a","Stat5b"]
GO:0030326	6	embryonic limb morphogenesis	14	100	0.694939	8.95141e-15	1.30285e-13	["Alx4","Ctnnb1","Hnf1a","Hoxa10","Hoxa9","Hoxd13","Lef1","Mecom","Pbx1","Rarg","Sall4","Shox2","Tbx3","Tbx5"]
GO:0035113	5	embryonic appendage morphogenesis	14	100	0.694939	8.95141e-15	1.30285e-13	["Alx4","Ctnnb1","Hnf1a","Hoxa10","Hoxa9","Hoxd13","Lef1","Mecom","Pbx1","Rarg","Sall4","Shox2","Tbx3","Tbx5"]
GO:0043067	6	regulation of programmed cell death	42	1556	10.8133	1.06892e-14	1.54451e-13	["Alx4","Atf4","Bcl6","Cebpb","Ctnnb1","Dlx1","Egr2","Foxc1","Foxo1","Foxo3","Foxp1","Gata6","Hmga2","Hnf1b","Irf5","Irf7","Jun","Lef1","Lhx3","Mecom","Nfatc4","Nfkb1","Nr2e1","Nr4a1","Pax7","Pou3f3","Rara","Rarg","Rela","Rxra","Six1","Sox10","Sox8","Sox9","Stat3","Stat5a","Stat5b","Tbx3","Tbx5","Tcf7l2","Trp53","Trp73"]
GO:0048729	4	tissue morphogenesis	23	420	2.91875	1.97491e-14	2.83307e-13	["Ctnnb1","Foxa2","Foxc1","Foxd1","Hnf1b","Hoxd13","Lef1","Nfatc4","Pax7","Pbx1","Rarg","Rxra","Shox2","Six1","Sox10","Sox11","Sox17","Sox8","Sox9","Stat5a","Tbx2","Tbx3","Tbx5"]
GO:0001701	7	in utero embryonic development	20	296	2.05702	2.22717e-14	3.17213e-13	["Ctnnb1","Foxa2","Foxc1","Foxp1","Gata6","Junb","Klf2","Mecom","Myb","Nr2f2","Prdm1","Rxra","Rxrb","Sall4","Sox10","Sox5","Sox6","Sox8","Tbx3","Trp53"]
GO:0044699	2	single-organism process	132	12631	87.7778	3.03007e-14	4.28508e-13	["Alx4","Arid5a","Arx","Atf4","Bbx","Bcl6","Cdx2","Cebpa","Cebpb","Cebpg","Ctnnb1","Dbp","Dlx1","Dlx2","E2f6","E4f1","Egr2","Elf1","Fos","Fosl2","Foxa2","Foxa3","Foxc1","Foxd1","Foxg1","Foxi1","Foxj1","Foxj2","Foxj3","Foxk1","Foxo1","Foxo3","Foxo4","Foxp1","Foxp3","Gata6","Gfi1b","Hlf","Hlx","Hmga1","Hmga2","Hnf1a","Hnf1b","Hoxa10","Hoxa9","Hoxb3","Hoxd13","Hoxd3","Irf1","Irf2","Irf3","Irf4","Irf…
GO:0043009	6	chordate embryonic development	20	302	2.09872	3.25565e-14	4.57167e-13	["Ctnnb1","Foxa2","Foxc1","Foxp1","Gata6","Junb","Klf2","Mecom","Myb","Nr2f2","Prdm1","Rxra","Rxrb","Sall4","Sox10","Sox5","Sox6","Sox8","Tbx3","Trp53"]
GO:0042981	7	regulation of apoptotic process	41	1540	10.7021	3.82636e-14	5.33549e-13	["Alx4","Atf4","Bcl6","Cebpb","Ctnnb1","Dlx1","Egr2","Foxc1","Foxo1","Foxo3","Foxp1","Gata6","Hmga2","Hnf1b","Irf5","Irf7","Jun","Lef1","Lhx3","Nfatc4","Nfkb1","Nr2e1","Nr4a1","Pax7","Pou3f3","Rara","Rarg","Rela","Rxra","Six1","Sox10","Sox8","Sox9","Stat3","Stat5a","Stat5b","Tbx3","Tbx5","Tcf7l2","Trp53","Trp73"]
GO:0072091	6	regulation of stem cell proliferation	14	111	0.771383	3.98974e-14	5.52468e-13	["Ctnnb1","Foxg1","Foxp1","Hmga2","Nr2e1","Pax6","Shox2","Six1","Sox10","Sox11","Sox17","Sox9","Tbx3","Trp53"]
GO:0009790	4	embryo development	22	390	2.71026	4.18474e-14	5.75474e-13	["Ctnnb1","E4f1","Foxa2","Foxc1","Foxi1","Foxp1","Gata6","Junb","Klf2","Mecom","Myb","Nr2f2","Prdm1","Rxra","Rxrb","Sall4","Sox10","Sox5","Sox6","Sox8","Tbx3","Trp53"]
GO:0009792	5	embryo development ending in birth or egg hatching	20	309	2.14736	5.01632e-14	6.85105e-13	["Ctnnb1","Foxa2","Foxc1","Foxp1","Gata6","Junb","Klf2","Mecom","Myb","Nr2f2","Prdm1","Rxra","Rxrb","Sall4","Sox10","Sox5","Sox6","Sox8","Tbx3","Trp53"]
GO:0060429	5	epithelium development	19	288	2.00143	1.59097e-13	2.15809e-12	["Ctnnb1","Foxc1","Foxj1","Hnf1b","Mecom","Meox1","Pou3f3","Rara","Rarg","Sall4","Six1","Sox11","Sox17","Sox9","Stat5a","Tbx3","Tbx5","Tcf7","Tcf7l2"]
GO:0035107	4	appendage morphogenesis	14	123	0.854775	1.70546e-13	2.28234e-12	["Alx4","Ctnnb1","Hnf1a","Hoxa10","Hoxa9","Hoxd13","Lef1","Mecom","Pbx1","Rarg","Sall4","Shox2","Tbx3","Tbx5"]
GO:0035108	5	limb morphogenesis	14	123	0.854775	1.70546e-13	2.28234e-12	["Alx4","Ctnnb1","Hnf1a","Hoxa10","Hoxa9","Hoxd13","Lef1","Mecom","Pbx1","Rarg","Sall4","Shox2","Tbx3","Tbx5"]
GO:0001889	4	liver development	15	153	1.06326	2.09277e-13	2.78199e-12	["Cebpa","Cebpb","Cebpg","Ctnnb1","Dbp","Gata6","Hlx","Hnf1a","Hnf1b","Jun","Pou2f1","Rara","Rela","Rxra","Stat5b"]
GO:0044763	3	single-organism cellular process	113	9820	68.2431	3.12936e-13	4.13241e-12	["Arid5a","Arx","Atf4","Bcl6","Cdx2","Cebpa","Cebpb","Cebpg","Ctnnb1","Dlx1","Dlx2","E2f6","E4f1","Egr2","Elf1","Fos","Fosl2","Foxa2","Foxa3","Foxc1","Foxd1","Foxg1","Foxj1","Foxj2","Foxj3","Foxk1","Foxo1","Foxo3","Foxo4","Foxp1","Foxp3","Gata6","Gfi1b","Hlf","Hlx","Hmga1","Hmga2","Hnf1a","Hnf1b","Hoxa9","Hoxb3","Irf1","Irf3","Irf4","Irf6","Irf8","Irx5","Jun","Junb","Jund","Klf2","Lef1","Lhx3","L…
GO:0048468	4	cell development	28	750	5.21205	3.17338e-13	4.16297e-12	["Bcl6","Ctnnb1","Fosl2","Foxa2","Foxc1","Foxg1","Foxj1","Foxp1","Irf6","Irx5","Jund","Lef1","Meis1","Nfatc2","Nfatc4","Pax6","Prdm1","Rara","Rarg","Shox2","Sox10","Sox11","Sox6","Sox8","Sox9","Tbx3","Tcf7l2","Trp73"]
GO:2000648	7	positive regulation of stem cell proliferation	12	81	0.562901	3.86976e-13	5.04334e-12	["Ctnnb1","Foxg1","Foxp1","Hmga2","Nr2e1","Pax6","Shox2","Six1","Sox10","Sox11","Sox9","Tbx3"]
GO:0048646	3	anatomical structure formation involved in morphogenesis	30	879	6.10852	4.04469e-13	5.23709e-12	["Bcl6","Ctnnb1","Egr2","Foxa2","Foxc1","Foxj1","Gata6","Hnf1a","Hnf1b","Hoxb3","Jun","Lef1","Meis1","Nfkb2","Nr2e1","Pax6","Pou2f1","Rara","Rarg","Rxra","Sall4","Six1","Sox11","Sox17","Sox8","Sox9","Tbx2","Tbx3","Tbx5","Trp53"]
GO:0045637	6	regulation of myeloid cell differentiation	16	196	1.36208	5.60581e-13	7.21161e-12	["Cebpb","Ctnnb1","Fos","Foxo3","Foxp1","Gfi1b","Hoxa9","Irf7","Jun","Lef1","Mafb","Meis1","Rara","Rarg","Stat5a","Stat5b"]
GO:0001708	5	cell fate specification	11	64	0.444761	6.92449e-13	8.85092e-12	["Ctnnb1","Foxa2","Hnf1b","Lhx3","Mnx1","Pax6","Pou5f1","Six1","Sox17","Sox6","Sox9"]
GO:0002521	6	leukocyte differentiation	19	315	2.18906	7.85963e-13	9.96683e-12	["Bcl6","Cebpa","Cebpg","Ctnnb1","Foxp1","Foxp3","Irf1","Irf4","Jun","Junb","Lef1","Mafb","Myb","Pou2f2","Relb","Stat5a","Stat5b","Tcf7","Trp53"]
GO:0051716	3	cellular response to stimulus	54	2810	19.5278	7.89749e-13	9.96683e-12	["Atf4","Bcl6","Cebpa","Cebpb","Ctnnb1","Egr2","Fos","Fosb","Fosl2","Foxa3","Foxj1","Foxo1","Foxo3","Foxo4","Gata6","Hmga1","Hmga2","Irf1","Irf3","Irf7","Irf8","Jun","Junb","Jund","Klf2","Lef1","Myb","Nfatc2","Nfatc4","Nfe2l1","Nfil3","Nfkb1","Nr1h3","Nr4a1","Pax6","Rara","Rarg","Rela","Relb","Rxra","Rxrb","Sox5","Sox6","Sox9","Stat3","Stat5a","Stat5b","Stat6","Tbx2","Tbx3","Tcf7","Tcf7l2","Trp53…
GO:0070887	4	cellular response to chemical stimulus	40	1633	11.3484	1.23027e-12	1.54286e-11	["Cebpa","Cebpb","Ctnnb1","Egr2","Fos","Fosb","Fosl2","Foxj1","Foxo1","Foxo3","Gata6","Irf1","Irf3","Irf8","Jun","Junb","Jund","Klf2","Lef1","Myb","Nfatc4","Nfe2l1","Nfil3","Nfkb1","Nr1h3","Nr4a1","Pax6","Rara","Rarg","Rela","Rxra","Rxrb","Sox5","Sox6","Sox9","Stat3","Stat5a","Stat5b","Stat6","Tcf7"]
GO:0008283	3	cell proliferation	27	738	5.12865	1.42354e-12	1.77408e-11	["Arx","Cebpb","Ctnnb1","E4f1","Foxc1","Gfi1b","Hmga2","Hnf1b","Irf2","Irf6","Junb","Lef1","Lhx5","Lhx9","Mecom","Pax6","Prdm1","Rxra","Rxrb","Sall4","Sox11","Sox9","Stat3","Stat6","Tcf7l2","Trp53","Uncx"]
GO:0071310	5	cellular response to organic substance	36	1344	9.33999	1.65523e-12	2.05002e-11	["Cebpa","Cebpb","Ctnnb1","Egr2","Fos","Fosb","Fosl2","Foxj1","Foxo1","Gata6","Irf1","Irf3","Irf8","Jun","Junb","Jund","Klf2","Lef1","Myb","Nfil3","Nfkb1","Nr1h3","Nr4a1","Pax6","Rara","Rarg","Rela","Rxra","Rxrb","Sox5","Sox6","Sox9","Stat3","Stat5a","Stat5b","Tcf7"]
GO:0030522	6	intracellular receptor signaling pathway	15	186	1.29259	3.66652e-12	4.51298e-11	["Ctnnb1","Irf3","Irf7","Nr1h2","Nr1h3","Nr1i2","Nr1i3","Nr2f2","Nr4a1","Rara","Rarg","Rela","Rxra","Rxrb","Stat3"]
GO:0001763	4	morphogenesis of a branching structure	15	187	1.29954	3.96271e-12	4.84764e-11	["Ctnnb1","Dlx2","Foxa2","Foxd1","Hnf1b","Hoxd13","Lef1","Nfatc4","Pbx1","Prdm1","Six1","Sox10","Sox8","Sox9","Tbx3"]
GO:0035295	4	tube development	16	225	1.56361	4.66695e-12	5.67433e-11	["Alx4","Ctnnb1","Foxc1","Foxj1","Hnf1b","Myb","Pou3f3","Rara","Rxra","Sall4","Six1","Sox17","Sox9","Tbx3","Tcf7","Tcf7l2"]
GO:0019827	4	stem cell maintenance	14	157	1.09105	5.04202e-12	6.09321e-11	["Cdx2","Ctnnb1","Foxo1","Foxo3","Hmga2","Mecom","Nr2e1","Pbx1","Pou5f1","Sall4","Sox9","Stat3","Tbx3","Tcf7l2"]
GO:0098727	3	maintenance of cell number	14	159	1.10495	5.99476e-12	7.20093e-11	["Cdx2","Ctnnb1","Foxo1","Foxo3","Hmga2","Mecom","Nr2e1","Pbx1","Pou5f1","Sall4","Sox9","Stat3","Tbx3","Tcf7l2"]
GO:0035051	6	cardiocyte differentiation	10	57	0.396115	6.40736e-12	7.65046e-11	["Ctnnb1","Foxp1","Gata6","Rara","Rxra","Rxrb","Sox17","Sox6","Tbx3","Tbx5"]
GO:1903707	6	negative regulation of hemopoiesis	13	131	0.910371	7.62523e-12	9.05042e-11	["Bcl6","Ctnnb1","Foxj1","Foxp3","Hlx","Hoxa9","Irf1","Mafb","Meis1","Rara","Stat5a","Stat5b","Zfp35"]
GO:0030182	6	neuron differentiation	18	322	2.2377	1.1623e-11	1.37138e-10	["Cebpb","Ctnnb1","Dlx1","Dlx2","Foxa2","Irx5","Lef1","Lhx3","Lhx5","Mnx1","Nr2e1","Pax7","Sox11","Sox5","Sox8","Sox9","Stat3","Uncx"]
GO:0009954	6	proximal/distal pattern formation	8	28	0.194583	1.25409e-11	1.47097e-10	["Ctnnb1","Dlx1","Dlx2","Hoxa10","Hoxa9","Irx2","Irx3","Pbx1"]
GO:0010033	4	response to organic substance	48	2455	17.0608	1.35505e-11	1.5801e-10	["Cebpa","Cebpb","Ctnnb1","Egr2","Fos","Fosb","Fosl2","Foxa2","Foxj1","Foxo1","Foxp1","Gata6","Hnf1a","Hnf1b","Irf1","Irf3","Irf5","Irf8","Jun","Junb","Jund","Klf2","Lef1","Myb","Nfil3","Nfkb1","Nfkb2","Nr1h3","Nr2f2","Nr4a1","Pax6","Pou5f1","Rara","Rarg","Rela","Relb","Rxra","Rxrb","Sox30","Sox5","Sox6","Sox9","Stat3","Stat5a","Stat5b","Stat6","Tcf7","Tcf7l2"]
GO:0001819	6	positive regulation of cytokine production	19	371	2.57823	1.37969e-11	1.59948e-10	["Atf4","Cebpb","Cebpg","Ctnnb1","Foxp3","Irf1","Irf3","Irf4","Irf5","Irf7","Irf8","Nfatc4","Nfkb1","Nfkb2","Rara","Rela","Stat5a","Stat5b","Stat6"]
GO:0008285	6	negative regulation of cell proliferation	25	693	4.81593	1.43318e-11	1.65189e-10	["Bcl6","Cebpa","Cebpb","Ctnnb1","Foxa3","Foxj1","Foxo4","Foxp3","Hmga1","Irf1","Irf6","Jun","Nr2e1","Nr2f2","Pax6","Prdm1","Rara","Rarg","Rxra","Sox11","Sox9","Stat3","Tbx5","Trp53","Trp73"]
GO:0050776	5	regulation of immune response	27	825	5.73325	1.84737e-11	2.11704e-10	["Bcl6","Fos","Foxj1","Foxo1","Foxo3","Foxo4","Foxp3","Hlx","Irf1","Irf3","Irf4","Irf7","Jun","Myb","Nfatc2","Nfkb1","Nfkb2","Nr1h2","Nr1h3","Nr4a1","Rara","Rela","Relb","Stat5a","Stat5b","Stat6","Zfp35"]
GO:0042221	3	response to chemical	53	2949	20.4938	1.92227e-11	2.19029e-10	["Cebpa","Cebpb","Ctnnb1","Egr2","Fos","Fosb","Fosl2","Foxa2","Foxj1","Foxo1","Foxo3","Foxp1","Gata6","Hnf1a","Hnf1b","Irf1","Irf3","Irf5","Irf8","Jun","Junb","Jund","Klf2","Lef1","Myb","Nfatc2","Nfatc4","Nfe2l1","Nfil3","Nfkb1","Nfkb2","Nr1h3","Nr2f2","Nr4a1","Pax6","Pou5f1","Rara","Rarg","Rela","Relb","Rxra","Rxrb","Sox30","Sox5","Sox6","Sox9","Stat3","Stat5a","Stat5b","Stat6","Tcf7","Tcf7l2","…
GO:1903708	6	positive regulation of hemopoiesis	14	175	1.21614	2.20556e-11	2.4988e-10	["Fos","Foxc1","Foxo3","Foxp3","Gfi1b","Hlx","Irf1","Jun","Lef1","Myb","Prdm1","Rara","Stat5a","Stat5b"]
GO:0002009	5	morphogenesis of an epithelium	18	336	2.335	2.3503e-11	2.64773e-10	["Ctnnb1","Foxa2","Foxd1","Hnf1b","Hoxd13","Lef1","Nfatc4","Pbx1","Rarg","Six1","Sox10","Sox11","Sox17","Sox8","Sox9","Stat5a","Tbx3","Tbx5"]
GO:0048585	5	negative regulation of response to stimulus	34	1339	9.30524	3.34415e-11	3.7462e-10	["Atf4","Bcl6","Ctnnb1","Dlx1","Dlx2","Elf1","Foxa2","Foxj1","Foxo1","Foxo3","Foxp1","Foxp3","Hlx","Hmga2","Irf1","Irf3","Irf4","Lef1","Mecom","Nfkb1","Nr1h2","Nr1h3","Pou5f1","Prdm1","Rela","Sox10","Sox17","Sox9","Stat6","Tcf7l2","Trp53","Trp73","Zfp35","Zfp536"]
GO:0045622	6	regulation of T-helper cell differentiation	8	32	0.222381	4.14545e-11	4.61789e-10	["Bcl6","Foxp3","Hlx","Irf1","Irf4","Myb","Rara","Zfp35"]
GO:0030855	6	epithelial cell differentiation	18	348	2.41839	4.18598e-11	4.63713e-10	["Cebpb","Ctnnb1","Foxa2","Foxp1","Gata6","Hnf1b","Irf6","Jun","Klf2","Lef1","Pax6","Rxra","Six1","Sox10","Sox11","Sox17","Sox9","Stat5a"]
GO:0060850	9	regulation of transcription involved in cell fate commitment	7	20	0.138988	4.91215e-11	5.4115e-10	["Cebpb","Dlx1","Dlx2","Nr2f2","Pax6","Pou5f1","Sox17"]
GO:1901700	4	response to oxygen-containing compound	38	1676	11.6472	5.12139e-11	5.61102e-10	["Cebpb","Ctnnb1","Egr2","Fos","Fosb","Fosl2","Foxa2","Foxj1","Foxo1","Foxp1","Gata6","Hnf1a","Hnf1b","Irf1","Irf3","Irf5","Irf8","Jun","Junb","Jund","Klf2","Nfkb1","Nfkb2","Nr1h3","Nr2f2","Pax6","Pou5f1","Rara","Rarg","Rela","Rxra","Rxrb","Sox9","Stat3","Stat5a","Stat5b","Stat6","Tcf7l2"]
GO:0030098	5	lymphocyte differentiation	15	225	1.56361	5.60401e-11	6.10623e-10	["Bcl6","Cebpg","Ctnnb1","Foxp1","Foxp3","Irf1","Lef1","Mafb","Myb","Pou2f2","Relb","Stat5a","Stat5b","Tcf7","Trp53"]
GO:0045619	7	regulation of lymphocyte differentiation	13	154	1.07021	5.98664e-11	6.4877e-10	["Bcl6","Foxj1","Foxp3","Hlx","Irf1","Irf4","Myb","Prdm1","Rara","Sox13","Stat5a","Stat5b","Zfp35"]
GO:0002684	5	positive regulation of immune system process	27	873	6.06682	6.61766e-11	7.13277e-10	["Bcl6","Fos","Foxc1","Foxj1","Foxo3","Foxp1","Foxp3","Gfi1b","Hlx","Irf1","Irf3","Irf7","Jun","Lef1","Myb","Nfatc2","Nfkb1","Nfkb2","Nr1h3","Prdm1","Rara","Rela","Relb","Stat5a","Stat5b","Stat6","Trp53"]
GO:0045580	8	regulation of T cell differentiation	12	124	0.861725	6.74797e-11	7.23411e-10	["Bcl6","Foxj1","Foxp3","Hlx","Irf1","Irf4","Myb","Rara","Sox13","Stat5a","Stat5b","Zfp35"]
GO:0002376	2	immune system process	39	1780	12.3699	7.39983e-11	7.89052e-10	["Bcl6","Cebpb","Cebpg","Ctnnb1","Fos","Foxj1","Foxo1","Foxo3","Foxo4","Foxp1","Foxp3","Irf1","Irf3","Irf4","Irf5","Irf7","Irf8","Irf9","Jun","Klf2","Lef1","Mafb","Mecom","Mnx1","Myb","Nfatc2","Nfil3","Nfkb1","Nfkb2","Nr4a1","Pou2f2","Rela","Relb","Stat5a","Stat5b","Stat6","Tcf7","Trp53","Zfp35"]
GO:0060333	8	interferon-gamma-mediated signaling pathway	9	52	0.361368	8.54044e-11	9.05832e-10	["Irf1","Irf2","Irf3","Irf4","Irf5","Irf6","Irf7","Irf8","Irf9"]
GO:0048511	2	rhythmic process	18	365	2.53653	9.12688e-11	9.6291e-10	["Atf4","Cebpb","Dbp","Egr2","Fosl2","Foxc1","Foxo3","Hlf","Hnf1b","Jun","Jund","Nfil3","Nfkb2","Relb","Stat5a","Stat5b","Tef","Trp53"]
GO:0033993	5	response to lipid	30	1094	7.60264	9.40408e-11	9.86933e-10	["Cebpa","Cebpb","Ctnnb1","Fos","Fosb","Fosl2","Foxj1","Foxp1","Gata6","Irf1","Irf3","Irf8","Jun","Junb","Jund","Nfkb1","Nfkb2","Nr1h3","Nr2f2","Pax6","Pou5f1","Rara","Rarg","Rela","Rxra","Rxrb","Sox30","Sox9","Stat3","Stat5b"]
GO:0048583	4	regulation of response to stimulus	57	3494	24.2812	1.14005e-10	1.19019e-09	["Atf4","Bcl6","Cebpg","Ctnnb1","Dlx1","Dlx2","Elf1","Fos","Foxa2","Foxd1","Foxj1","Foxo1","Foxo3","Foxo4","Foxp1","Foxp3","Gata6","Hlx","Hmga1","Hmga2","Hnf1a","Hnf1b","Irf1","Irf3","Irf4","Irf7","Jun","Lef1","Mecom","Myb","Nfatc2","Nfatc4","Nfkb1","Nfkb2","Nr1h2","Nr1h3","Nr4a1","Pou5f1","Prdm1","Rara","Rela","Relb","Rxrb","Shox2","Sox10","Sox11","Sox17","Sox9","Stat3","Stat5a","Stat5b","Stat6"…
GO:0051726	5	regulation of cell cycle	28	965	6.70617	1.21562e-10	1.26248e-09	["Cebpa","Ctnnb1","E4f1","Foxc1","Foxg1","Foxk1","Foxo4","Gata6","Hmga2","Irf1","Irf6","Jun","Junb","Jund","Lef1","Mecom","Nr2e1","Nr2f2","Pbx1","Rara","Sox11","Sox9","Stat5a","Stat5b","Tbx3","Tcf7l2","Trp53","Trp73"]
GO:0006952	4	defense response	33	1336	9.28439	1.41637e-10	1.46334e-09	["Bcl6","Cebpa","Cebpb","Cebpg","Ctnnb1","Fos","Foxo1","Foxo3","Foxo4","Irf1","Irf3","Irf4","Irf5","Irf7","Irf8","Irf9","Jun","Mecom","Nfatc2","Nfatc4","Nfe2l1","Nfkb1","Nfkb2","Nr2e1","Nr4a1","Rela","Relb","Rxra","Stat3","Stat5b","Stat6","Trp73","Zfp35"]
GO:0060337	8	type I interferon signaling pathway	9	55	0.382217	1.45008e-10	1.49044e-09	["Irf1","Irf2","Irf3","Irf4","Irf5","Irf6","Irf7","Irf8","Irf9"]
GO:0014013	8	regulation of gliogenesis	11	103	0.715788	1.47323e-10	1.50647e-09	["Ctnnb1","Dlx1","Dlx2","Hmga2","Nr2e1","Rela","Sox10","Sox11","Sox8","Tcf7l2","Trp73"]
GO:0051249	6	regulation of lymphocyte activation	18	379	2.63382	1.68133e-10	1.71049e-09	["Bcl6","Cebpb","Ctnnb1","Foxj1","Foxp3","Hlx","Irf1","Irf4","Myb","Nfatc2","Prdm1","Rara","Sox11","Sox13","Stat5a","Stat5b","Stat6","Zfp35"]
GO:0001501	5	skeletal system development	14	205	1.42463	1.83178e-10	1.8541e-09	["Alx4","Ctnnb1","Dlx1","Dlx2","Foxc1","Hoxa10","Hoxa9","Hoxd13","Pax7","Pbx1","Shox2","Sox11","Sox9","Tbx3"]
GO:0055007	7	cardiac muscle cell differentiation	8	39	0.271026	2.32707e-10	2.34353e-09	["Foxp1","Gata6","Rara","Rxra","Rxrb","Sox6","Tbx3","Tbx5"]
GO:0042035	6	regulation of cytokine biosynthetic process	11	108	0.750535	2.47361e-10	2.47858e-09	["Cebpb","Cebpg","Foxj1","Foxp3","Irf1","Irf3","Irf4","Nfkb1","Rela","Stat5a","Stat5b"]
GO:0002694	5	regulation of leukocyte activation	19	442	3.07163	2.73277e-10	2.72457e-09	["Bcl6","Cebpb","Ctnnb1","Foxj1","Foxp3","Hlx","Irf1","Irf4","Myb","Nfatc2","Nr1h3","Prdm1","Rara","Sox11","Sox13","Stat5a","Stat5b","Stat6","Zfp35"]
GO:0043370	10	regulation of CD4-positive, alpha-beta T cell differentiation	8	40	0.277976	2.89181e-10	2.86879e-09	["Bcl6","Foxp3","Hlx","Irf1","Irf4","Myb","Rara","Zfp35"]
GO:1902107	7	positive regulation of leukocyte differentiation	12	142	0.986814	3.31296e-10	3.27032e-09	["Fos","Foxp3","Gfi1b","Hlx","Irf1","Jun","Lef1","Myb","Prdm1","Rara","Stat5a","Stat5b"]
GO:0061138	5	morphogenesis of a branching epithelium	13	177	1.23004	3.41826e-10	3.35764e-09	["Ctnnb1","Foxa2","Foxd1","Hnf1b","Hoxd13","Lef1","Nfatc4","Pbx1","Six1","Sox10","Sox8","Sox9","Tbx3"]
GO:0040008	4	regulation of growth	23	680	4.72559	3.60664e-10	3.52531e-09	["Arx","Bcl6","E4f1","Foxc1","Foxk1","Foxp1","Gata6","Hlx","Hmga2","Hnf1b","Irf8","Lef1","Six1","Sox17","Stat3","Stat5a","Stat5b","Tbx2","Tbx5","Tcf7l2","Trp53","Trp73","Zfp382"]
GO:0035239	4	tube morphogenesis	15	258	1.79294	3.8199e-10	3.71555e-09	["Ctnnb1","Foxa2","Foxd1","Gata6","Hnf1b","Lef1","Nfatc4","Pbx1","Six1","Sox10","Sox17","Sox8","Sox9","Tbx3","Trp73"]
GO:0071495	4	cellular response to endogenous stimulus	25	822	5.7124	5.20641e-10	5.03961e-09	["Cebpb","Ctnnb1","Egr2","Fos","Fosb","Fosl2","Foxj1","Foxo1","Gata6","Irf1","Jun","Junb","Jund","Klf2","Nfkb1","Nr4a1","Pax6","Rara","Rela","Rxra","Sox5","Sox6","Sox9","Stat3","Stat5b"]
GO:0048534	4	hematopoietic or lymphoid organ development	14	222	1.54277	5.23381e-10	5.04165e-09	["Ctnnb1","Gfi1b","Hoxa9","Hoxb3","Mafb","Meis1","Myb","Nfkb1","Nfkb2","Pbx1","Six1","Sox6","Stat5a","Stat5b"]
GO:2000736	6	regulation of stem cell differentiation	11	116	0.80613	5.37464e-10	5.15242e-09	["Ctnnb1","Foxa2","Foxc1","Gata6","Hmga2","Hnf1b","Lef1","Sox5","Sox6","Sox9","Tbx5"]
GO:0032870	5	cellular response to hormone stimulus	19	465	3.23147	6.3818e-10	6.08866e-09	["Ctnnb1","Egr2","Fos","Fosb","Fosl2","Foxj1","Foxo1","Gata6","Irf1","Jun","Junb","Jund","Nfkb1","Pax6","Rara","Rela","Rxra","Stat3","Stat5b"]
GO:0002761	7	regulation of myeloid leukocyte differentiation	11	118	0.820029	6.465e-10	6.10958e-09	["Cebpb","Ctnnb1","Fos","Foxp1","Gfi1b","Irf7","Jun","Lef1","Mafb","Rara","Stat5a"]
GO:0030217	6	T cell differentiation	11	118	0.820029	6.465e-10	6.10958e-09	["Ctnnb1","Foxp1","Foxp3","Irf1","Lef1","Mafb","Relb","Stat5a","Stat5b","Tcf7","Trp53"]
GO:2000514	9	regulation of CD4-positive, alpha-beta T cell activation	8	44	0.305773	6.50966e-10	6.12276e-09	["Bcl6","Foxp3","Hlx","Irf1","Irf4","Myb","Rara","Zfp35"]
GO:0042692	6	muscle cell differentiation	12	152	1.05631	7.29586e-10	6.83002e-09	["Ctnnb1","Foxp1","Gata6","Nfatc4","Rara","Rxra","Rxrb","Six1","Sox6","Sox9","Tbx3","Tbx5"]
GO:0046649	4	lymphocyte activation	17	366	2.54348	7.83594e-10	7.30134e-09	["Bcl6","Cebpb","Cebpg","Ctnnb1","Foxp1","Foxp3","Irf1","Irf4","Lef1","Mafb","Myb","Pou2f2","Relb","Stat5a","Stat5b","Tcf7","Trp53"]
GO:0009605	3	response to external stimulus	35	1592	11.0634	8.05974e-10	7.47494e-09	["Atf4","Cebpa","Cebpb","Ctnnb1","Fos","Fosb","Fosl2","Foxa3","Foxo1","Foxp1","Foxp3","Hmga1","Hmga2","Irf1","Irf3","Irf4","Irf5","Irf7","Irf8","Irf9","Jun","Junb","Jund","Mecom","Nfkb1","Nfkb2","Nr1h3","Rara","Rela","Rxra","Sox9","Stat5a","Stat5b","Tcf7l2","Trp53"]
GO:0030099	6	myeloid cell differentiation	13	190	1.32038	8.20553e-10	7.57492e-09	["Cebpa","Cebpg","Ctnnb1","Foxp1","Gfi1b","Irf4","Irf8","Jun","Junb","Lef1","Nfe2l1","Relb","Sox6"]
GO:0032808	5	lacrimal gland development	5	8	0.0555952	8.36914e-10	7.69035e-09	["Foxc1","Pax6","Rarg","Sox10","Sox9"]
GO:0045665	7	negative regulation of neuron differentiation	13	192	1.33428	9.33262e-10	8.53635e-09	["Foxa2","Foxg1","Irx3","Meis1","Nfatc4","Nr2e1","Pax6","Pbx1","Sox21","Sox8","Sox9","Trp73","Zfp536"]
GO:0050865	5	regulation of cell activation	19	476	3.30791	9.40877e-10	8.5667e-09	["Bcl6","Cebpb","Ctnnb1","Foxj1","Foxp3","Hlx","Irf1","Irf4","Myb","Nfatc2","Nr1h3","Prdm1","Rara","Sox11","Sox13","Stat5a","Stat5b","Stat6","Zfp35"]
GO:0048704	6	embryonic skeletal system morphogenesis	10	93	0.646294	9.68391e-10	8.77714e-09	["Alx4","Ctnnb1","Dlx2","Hoxb3","Hoxd3","Irx5","Shox2","Six1","Sox11","Tbx15"]
GO:0048609	3	multicellular organismal reproductive process	22	657	4.56575	1.09027e-09	9.83713e-09	["Bcl6","Foxa3","Foxj1","Foxo3","Hmga1","Hmga2","Hoxa10","Hoxa9","Junb","Nr2f2","Prdm1","Rara","Rxra","Rxrb","Sox17","Sox30","Sox8","Sox9","Stat5a","Tbp","Zfp35","Zfp39"]
GO:0006367	8	transcription initiation from RNA polymerase II promoter	14	237	1.64701	1.2285e-09	1.10344e-08	["Gtf2b","Junb","Nr1h2","Nr1h3","Nr1i2","Nr1i3","Nr2e1","Nr4a1","Rara","Rarg","Rxra","Rxrb","Tbp","Tbx5"]
GO:0031058	7	positive regulation of histone modification	9	71	0.493407	1.54527e-09	1.38173e-08	["Arid5a","Bcl6","Ctnnb1","Foxp3","Gfi1b","Jdp2","Myb","Pax7","Trp53"]
GO:2000738	7	positive regulation of stem cell differentiation	8	49	0.34052	1.60849e-09	1.43185e-08	["Ctnnb1","Foxc1","Gata6","Lef1","Sox5","Sox6","Sox9","Tbx5"]
GO:0051216	5	cartilage development	10	98	0.681041	1.62968e-09	1.44426e-08	["Dlx2","Hoxb3","Hoxd3","Pax7","Rara","Rarg","Shox2","Sox5","Sox6","Sox9"]
GO:1901652	5	response to peptide	18	446	3.09943	2.25723e-09	1.99156e-08	["Ctnnb1","Egr2","Fosl2","Foxa2","Foxj1","Foxo1","Irf1","Irf5","Junb","Jund","Klf2","Nfkb1","Pax6","Rela","Rxra","Stat3","Stat5a","Stat5b"]
GO:0045321	3	leukocyte activation	18	449	3.12028	2.50791e-09	2.20298e-08	["Bcl6","Cebpb","Cebpg","Ctnnb1","Foxp1","Foxp3","Irf1","Irf4","Jun","Lef1","Mafb","Myb","Pou2f2","Relb","Stat5a","Stat5b","Tcf7","Trp53"]
GO:1903310	6	positive regulation of chromatin modification	9	75	0.521205	2.54516e-09	2.2259e-08	["Arid5a","Bcl6","Ctnnb1","Foxp3","Gfi1b","Jdp2","Myb","Pax7","Trp53"]
GO:1901698	4	response to nitrogen compound	27	1035	7.19262	2.75637e-09	2.40009e-08	["Cebpa","Cebpb","Ctnnb1","Egr2","Fos","Fosb","Fosl2","Foxa2","Foxj1","Foxo1","Gata6","Irf1","Irf3","Irf5","Jun","Junb","Jund","Klf2","Nfkb1","Pax6","Rela","Rxra","Sox9","Stat3","Stat5a","Stat5b","Stat6"]
GO:0035019	5	somatic stem cell maintenance	9	76	0.528154	2.87005e-09	2.48821e-08	["Cdx2","Hmga2","Nr2e1","Pbx1","Pou5f1","Sall4","Sox9","Stat3","Tcf7l2"]
GO:0035115	7	embryonic forelimb morphogenesis	7	34	0.236279	3.1421e-09	2.71227e-08	["Alx4","Ctnnb1","Hoxa9","Mecom","Shox2","Tbx3","Tbx5"]
GO:0032481	7	positive regulation of type I interferon production	9	77	0.535103	3.23078e-09	2.7768e-08	["Ctnnb1","Irf1","Irf3","Irf5","Irf7","Nfkb1","Nfkb2","Rela","Stat6"]
GO:0048638	5	regulation of developmental growth	15	304	2.11262	3.63069e-09	3.10712e-08	["Arx","Foxc1","Foxp1","Gata6","Hlx","Hmga2","Hnf1b","Six1","Stat3","Stat5a","Stat5b","Tbx2","Tbx5","Tcf7l2","Trp73"]
GO:0048557	6	embryonic digestive tract morphogenesis	6	20	0.138988	3.65748e-09	3.11667e-08	["Hlx","Hnf1b","Shox2","Sox11","Tcf7","Tcf7l2"]
GO:0010001	6	glial cell differentiation	9	79	0.549002	4.07337e-09	3.45629e-08	["Egr2","Lef1","Pax6","Sox10","Sox5","Sox6","Sox8","Sox9","Stat3"]
GO:0051704	2	multi-organism process	31	1364	9.47897	4.17678e-09	3.52724e-08	["Cebpa","Cebpb","E4f1","Fos","Fosb","Fosl2","Foxp3","Gtf2b","Hmga1","Hmga2","Irf1","Irf3","Irf4","Irf5","Irf7","Irf8","Irf9","Jun","Junb","Lef1","Mecom","Nfkb1","Nr2e1","Rara","Rela","Rxra","Stat3","Stat5a","Stat5b","Tbp","Trp53"]
GO:0046637	9	regulation of alpha-beta T cell differentiation	8	55	0.382217	4.19236e-09	3.52724e-08	["Bcl6","Foxp3","Hlx","Irf1","Irf4","Myb","Rara","Zfp35"]
GO:1903308	8	regulation of chromatin modification	11	141	0.979865	4.33396e-09	3.63105e-08	["Arid5a","Bcl6","Ctnnb1","Foxp3","Gfi1b","Hmga1","Jdp2","Myb","Pax7","Pou5f1","Trp53"]
GO:0006955	3	immune response	28	1136	7.89451	4.66746e-09	3.89411e-08	["Bcl6","Cebpb","Cebpg","Ctnnb1","Fos","Foxj1","Foxo1","Foxo3","Foxo4","Foxp3","Irf1","Irf3","Irf5","Irf7","Irf8","Jun","Mnx1","Nfatc2","Nfil3","Nfkb1","Nfkb2","Nr4a1","Pou2f2","Rela","Relb","Stat6","Tcf7","Zfp35"]
GO:0045664	8	regulation of neuron differentiation	20	585	4.0654	4.69943e-09	3.90445e-08	["Bcl6","Foxa2","Foxg1","Hoxd3","Irx3","Meis1","Nfatc4","Nr2e1","Pax6","Pbx1","Rara","Shox2","Six1","Sox11","Sox21","Sox5","Sox8","Sox9","Trp73","Zfp536"]
GO:0032479	6	regulation of type I interferon production	10	112	0.778332	6.06087e-09	5.01468e-08	["Ctnnb1","Irf1","Irf3","Irf5","Irf7","Nfkb1","Nfkb2","Rela","Relb","Stat6"]
GO:1902106	7	negative regulation of leukocyte differentiation	9	83	0.5768	6.35358e-09	5.23514e-08	["Bcl6","Ctnnb1","Foxj1","Foxp3","Hlx","Irf1","Mafb","Rara","Zfp35"]
GO:1902275	7	regulation of chromatin organization	11	147	1.02156	6.72604e-09	5.51923e-08	["Arid5a","Bcl6","Ctnnb1","Foxp3","Gfi1b","Hmga1","Jdp2","Myb","Pax7","Pou5f1","Trp53"]
GO:0002829	7	negative regulation of type 2 immune response	5	11	0.0764433	6.78911e-09	5.5255e-08	["Bcl6","Hlx","Irf1","Stat6","Zfp35"]
GO:0045628	7	regulation of T-helper 2 cell differentiation	5	11	0.0764433	6.78911e-09	5.5255e-08	["Bcl6","Hlx","Irf1","Rara","Zfp35"]
GO:0022407	6	regulation of cell-cell adhesion	16	374	2.59907	8.17628e-09	6.62744e-08	["Bcl6","Cebpb","Ctnnb1","Foxa2","Foxj1","Foxp3","Hlx","Irf1","Irf4","Lef1","Myb","Rara","Sox13","Stat5a","Stat5b","Zfp35"]
GO:0006352	7	DNA-templated transcription, initiation	14	275	1.91108	8.30548e-09	6.70491e-08	["Gtf2b","Junb","Nr1h2","Nr1h3","Nr1i2","Nr1i3","Nr2e1","Nr4a1","Rara","Rarg","Rxra","Rxrb","Tbp","Tbx5"]
GO:0009607	3	response to biotic stimulus	24	872	6.05987	8.44663e-09	6.79136e-08	["Cebpb","Fos","Foxp1","Foxp3","Hmga1","Hmga2","Irf1","Irf3","Irf4","Irf5","Irf7","Irf8","Irf9","Jun","Junb","Jund","Mecom","Nfkb1","Nfkb2","Nr1h3","Rara","Rela","Stat5b","Trp53"]
GO:0021953	7	central nervous system neuron differentiation	10	116	0.80613	8.53128e-09	6.82357e-08	["Dlx1","Dlx2","Lef1","Lhx3","Lhx5","Mnx1","Nr2e1","Pax7","Sox5","Uncx"]
GO:0060688	5	regulation of morphogenesis of a branching structure	8	60	0.416964	8.55513e-09	6.82357e-08	["Ctnnb1","Hnf1b","Hoxd13","Rxra","Shox2","Six1","Sox8","Sox9"]
GO:0009719	3	response to endogenous stimulus	32	1492	10.3685	9.03435e-09	7.17709e-08	["Cebpa","Cebpb","Ctnnb1","Egr2","Fos","Fosb","Fosl2","Foxa2","Foxj1","Foxo1","Gata6","Irf1","Irf5","Jun","Junb","Jund","Klf2","Nfkb1","Nr1h3","Nr2f2","Nr4a1","Pax6","Rara","Rela","Rxra","Sox30","Sox5","Sox6","Sox9","Stat3","Stat5a","Stat5b"]
GO:2000826	7	regulation of heart morphogenesis	6	23	0.159836	9.36301e-09	7.40866e-08	["Ctnnb1","Foxc1","Six1","Sox9","Tbx2","Tbx5"]
GO:0050863	7	regulation of T cell activation	14	280	1.94583	1.04391e-08	8.22751e-08	["Bcl6","Cebpb","Ctnnb1","Foxj1","Foxp3","Hlx","Irf1","Irf4","Myb","Rara","Sox13","Stat5a","Stat5b","Zfp35"]
GO:0010243	4	response to organonitrogen compound	25	956	6.64362	1.10033e-08	8.63806e-08	["Cebpa","Cebpb","Ctnnb1","Egr2","Fos","Fosb","Fosl2","Foxa2","Foxj1","Foxo1","Gata6","Irf1","Irf5","Jun","Junb","Jund","Klf2","Nfkb1","Pax6","Rela","Rxra","Sox9","Stat3","Stat5a","Stat5b"]
GO:0045629	8	negative regulation of T-helper 2 cell differentiation	4	5	0.034747	1.11605e-08	8.72709e-08	["Bcl6","Hlx","Irf1","Zfp35"]
GO:0043371	11	negative regulation of CD4-positive, alpha-beta T cell differentiation	5	12	0.0833927	1.15733e-08	8.97941e-08	["Bcl6","Foxp3","Hlx","Irf1","Zfp35"]
GO:0045623	7	negative regulation of T-helper cell differentiation	5	12	0.0833927	1.15733e-08	8.97941e-08	["Bcl6","Foxp3","Hlx","Irf1","Zfp35"]
GO:0048568	4	embryonic organ development	11	156	1.08411	1.25389e-08	9.6909e-08	["Cebpa","Cebpb","Junb","Myb","Pbx1","Prdm1","Rara","Rarg","Sox17","Sox9","Trp53"]
GO:0031018	4	endocrine pancreas development	7	41	0.284925	1.26072e-08	9.70607e-08	["Foxa2","Foxa3","Foxo1","Hnf1a","Hnf1b","Mnx1","Sox9"]
GO:0048863	6	stem cell differentiation	9	90	0.625445	1.30991e-08	1.0046e-07	["Foxc1","Foxo4","Hmga2","Hnf1b","Meox1","Pou5f1","Sox10","Sox17","Sox21"]
GO:0061035	6	regulation of cartilage development	8	64	0.444761	1.44562e-08	1.10443e-07	["Ctnnb1","Rara","Rarg","Rela","Shox2","Sox5","Sox6","Sox9"]
GO:0042110	5	T cell activation	13	241	1.6748	1.45916e-08	1.11052e-07	["Cebpb","Ctnnb1","Foxp1","Foxp3","Irf1","Irf4","Lef1","Mafb","Relb","Stat5a","Stat5b","Tcf7","Trp53"]
GO:0070489	4	T cell aggregation	13	242	1.68175	1.53285e-08	1.16217e-07	["Cebpb","Ctnnb1","Foxp1","Foxp3","Irf1","Irf4","Lef1","Mafb","Relb","Stat5a","Stat5b","Tcf7","Trp53"]
GO:1903037	7	regulation of leukocyte cell-cell adhesion	14	289	2.00837	1.55713e-08	1.1761e-07	["Bcl6","Cebpb","Ctnnb1","Foxj1","Foxp3","Hlx","Irf1","Irf4","Myb","Rara","Sox13","Stat5a","Stat5b","Zfp35"]
GO:0046620	5	regulation of organ growth	9	92	0.639344	1.59239e-08	1.1982e-07	["Arx","Foxc1","Foxp1","Gata6","Hlx","Tbx2","Tbx5","Tcf7l2","Trp73"]
GO:0002828	6	regulation of type 2 immune response	6	25	0.173735	1.62389e-08	1.21731e-07	["Bcl6","Hlx","Irf1","Rara","Stat6","Zfp35"]
GO:0071593	7	lymphocyte aggregation	13	244	1.69565	1.69041e-08	1.26242e-07	["Cebpb","Ctnnb1","Foxp1","Foxp3","Irf1","Irf4","Lef1","Mafb","Relb","Stat5a","Stat5b","Tcf7","Trp53"]
GO:0035136	6	forelimb morphogenesis	7	43	0.298824	1.78613e-08	1.32894e-07	["Alx4","Ctnnb1","Hoxa9","Mecom","Shox2","Tbx3","Tbx5"]
GO:2000515	10	negative regulation of CD4-positive, alpha-beta T cell activation	5	13	0.0903421	1.87012e-08	1.38625e-07	["Bcl6","Foxp3","Hlx","Irf1","Zfp35"]
GO:0043207	4	response to external biotic stimulus	23	842	5.85139	2.0559e-08	1.51832e-07	["Cebpb","Fos","Foxp1","Foxp3","Hmga1","Hmga2","Irf1","Irf3","Irf4","Irf5","Irf7","Irf8","Irf9","Jun","Junb","Jund","Mecom","Nfkb1","Nfkb2","Nr1h3","Rara","Rela","Stat5b"]
GO:0070486	6	leukocyte aggregation	13	250	1.73735	2.25474e-08	1.65902e-07	["Cebpb","Ctnnb1","Foxp1","Foxp3","Irf1","Irf4","Lef1","Mafb","Relb","Stat5a","Stat5b","Tcf7","Trp53"]
GO:0034110	7	regulation of homotypic cell-cell adhesion	14	298	2.07092	2.28984e-08	1.67866e-07	["Bcl6","Cebpb","Ctnnb1","Foxj1","Foxp3","Hlx","Irf1","Irf4","Myb","Rara","Sox13","Stat5a","Stat5b","Zfp35"]
GO:0043434	5	response to peptide hormone	16	405	2.8145	2.49447e-08	1.82197e-07	["Ctnnb1","Egr2","Fosl2","Foxa2","Foxj1","Foxo1","Irf1","Junb","Jund","Nfkb1","Pax6","Rela","Rxra","Stat3","Stat5a","Stat5b"]
GO:2001252	7	positive regulation of chromosome organization	9	98	0.681041	2.7841e-08	2.0261e-07	["Arid5a","Bcl6","Ctnnb1","Foxp3","Gfi1b","Jdp2","Myb","Pax7","Trp53"]
GO:0072079	7	nephron tubule formation	5	14	0.0972915	2.89278e-08	2.09753e-07	["Ctnnb1","Hnf1b","Six1","Sox8","Sox9"]
GO:0032330	6	regulation of chondrocyte differentiation	7	46	0.319672	2.91549e-08	2.10633e-07	["Ctnnb1","Rarg","Rela","Shox2","Sox5","Sox6","Sox9"]
GO:0016202	6	regulation of striated muscle tissue development	10	132	0.91732	2.96849e-08	2.13688e-07	["Foxp1","Gata6","Lef1","Shox2","Six1","Sox17","Tbx2","Tbx5","Tcf7l2","Trp73"]
GO:0009725	4	response to hormone	25	1009	7.01194	3.16845e-08	2.27262e-07	["Cebpa","Ctnnb1","Egr2","Fos","Fosb","Fosl2","Foxa2","Foxj1","Foxo1","Gata6","Irf1","Jun","Junb","Jund","Nfkb1","Nr1h3","Nr2f2","Pax6","Rara","Rela","Rxra","Sox30","Stat3","Stat5a","Stat5b"]
GO:2000027	6	regulation of organ morphogenesis	11	171	1.18835	3.25235e-08	2.32444e-07	["Ctnnb1","Foxc1","Hnf1b","Hoxd13","Rxra","Six1","Sox17","Sox8","Sox9","Tbx2","Tbx5"]
GO:0048634	6	regulation of muscle organ development	10	134	0.931219	3.42783e-08	2.43242e-07	["Foxp1","Gata6","Lef1","Shox2","Six1","Sox17","Tbx2","Tbx5","Tcf7l2","Trp73"]
GO:1901861	5	regulation of muscle tissue development	10	134	0.931219	3.42783e-08	2.43242e-07	["Foxp1","Gata6","Lef1","Shox2","Six1","Sox17","Tbx2","Tbx5","Tcf7l2","Trp73"]
GO:0048705	5	skeletal system morphogenesis	10	135	0.938168	3.68019e-08	2.60224e-07	["Alx4","Ctnnb1","Dlx2","Hoxb3","Hoxd3","Irx5","Shox2","Six1","Sox11","Tbx15"]
GO:0001775	4	cell activation	20	663	4.60745	3.77347e-08	2.65876e-07	["Bcl6","Cebpb","Cebpg","Ctnnb1","Foxp1","Foxp3","Hoxa9","Irf1","Irf4","Jun","Lef1","Mafb","Myb","Nfkb2","Pou2f2","Relb","Stat5a","Stat5b","Tcf7","Trp53"]
GO:0051146	7	striated muscle cell differentiation	8	73	0.507306	4.16449e-08	2.92394e-07	["Foxp1","Gata6","Rara","Rxra","Rxrb","Sox6","Tbx3","Tbx5"]
GO:0046639	10	negative regulation of alpha-beta T cell differentiation	5	15	0.104241	4.31487e-08	3.01889e-07	["Bcl6","Foxp3","Hlx","Irf1","Zfp35"]
GO:0045685	9	regulation of glial cell differentiation	8	74	0.514255	4.64197e-08	3.23639e-07	["Ctnnb1","Dlx1","Dlx2","Hmga2","Nr2e1","Rela","Tcf7l2","Trp73"]
GO:0046634	8	regulation of alpha-beta T cell activation	8	77	0.535103	6.36785e-08	4.42421e-07	["Bcl6","Foxp3","Hlx","Irf1","Irf4","Myb","Rara","Zfp35"]
GO:0045581	9	negative regulation of T cell differentiation	6	31	0.215431	6.52285e-08	4.51617e-07	["Bcl6","Foxj1","Foxp3","Hlx","Irf1","Zfp35"]
GO:0001709	5	cell fate determination	7	52	0.361368	7.03745e-08	4.83886e-07	["Ctnnb1","Foxg1","Gata6","Pax6","Pou5f1","Sox17","Tbx2"]
GO:0046631	6	alpha-beta T cell activation	7	52	0.361368	7.03745e-08	4.83886e-07	["Cebpb","Foxp1","Foxp3","Irf1","Lef1","Relb","Tcf7"]
GO:0002695	6	negative regulation of leukocyte activation	10	146	1.01461	7.74799e-08	5.30911e-07	["Bcl6","Cebpb","Foxj1","Foxp3","Hlx","Irf1","Nr1h3","Prdm1","Sox11","Zfp35"]
GO:0009968	6	negative regulation of signal transduction	25	1060	7.36636	8.19569e-08	5.59664e-07	["Bcl6","Ctnnb1","Dlx1","Dlx2","Elf1","Foxo1","Foxo3","Foxp1","Hmga2","Irf1","Irf4","Lef1","Mecom","Nr1h2","Nr1h3","Pou5f1","Prdm1","Rela","Sox10","Sox17","Sox9","Tcf7l2","Trp53","Trp73","Zfp536"]
GO:0006954	5	inflammatory response	16	443	3.07858	8.5806e-08	5.83949e-07	["Bcl6","Cebpa","Cebpb","Fos","Mecom","Nfatc4","Nfe2l1","Nfkb1","Nfkb2","Rela","Relb","Rxra","Stat3","Stat5b","Trp73","Zfp35"]
GO:0019221	7	cytokine-mediated signaling pathway	15	386	2.68247	8.64854e-08	5.86571e-07	["Cebpa","Irf1","Irf2","Irf3","Irf4","Irf5","Irf6","Irf7","Irf8","Irf9","Rela","Stat3","Stat5a","Stat5b","Stat6"]
GO:0007159	5	leukocyte cell-cell adhesion	13	282	1.95973	9.25407e-08	6.25513e-07	["Cebpb","Ctnnb1","Foxp1","Foxp3","Irf1","Irf4","Lef1","Mafb","Relb","Stat5a","Stat5b","Tcf7","Trp53"]
GO:0050670	7	regulation of lymphocyte proliferation	11	190	1.32038	9.57353e-08	6.44919e-07	["Bcl6","Cebpb","Ctnnb1","Foxj1","Foxp3","Irf1","Nfatc2","Prdm1","Sox11","Stat5a","Stat5b"]
GO:0060479	6	lung cell differentiation	6	33	0.22933	9.70028e-08	6.51258e-07	["Ctnnb1","Foxa2","Foxp1","Gata6","Klf2","Sox9"]
GO:0014070	5	response to organic cyclic compound	25	1073	7.4567	1.03406e-07	6.91918e-07	["Cebpa","Ctnnb1","Egr2","Fos","Fosb","Fosl2","Foxj1","Gata6","Hnf1b","Irf1","Irf3","Jun","Junb","Jund","Klf2","Lef1","Nfkb1","Nr1h3","Nr2f2","Rara","Rela","Rxra","Sox30","Stat3","Stat5b"]
GO:0032944	7	regulation of mononuclear cell proliferation	11	192	1.33428	1.06487e-07	7.10154e-07	["Bcl6","Cebpb","Ctnnb1","Foxj1","Foxp3","Irf1","Nfatc2","Prdm1","Sox11","Stat5a","Stat5b"]
GO:0007568	4	aging	14	340	2.36279	1.17456e-07	7.80693e-07	["Fos","Fosl2","Foxg1","Hmga1","Hmga2","Jun","Jund","Nfkb2","Rela","Rxra","Stat3","Tbx2","Tbx3","Trp53"]
GO:0060788	4	ectodermal placode formation	5	18	0.125089	1.21053e-07	8.01927e-07	["Ctnnb1","Pou2f1","Six1","Tbx2","Tbx3"]
GO:0001704	4	formation of primary germ layer	7	57	0.396115	1.35092e-07	8.91963e-07	["Ctnnb1","Foxa2","Foxc1","Hnf1a","Hnf1b","Lef1","Sox17"]
GO:0007423	4	sensory organ development	10	155	1.07716	1.36127e-07	8.92886e-07	["Foxc1","Lef1","Mafb","Nr2e1","Pax6","Rara","Rarg","Rxra","Six1","Sox9"]
GO:0048754	5	branching morphogenesis of an epithelial tube	10	155	1.07716	1.36127e-07	8.92886e-07	["Ctnnb1","Foxa2","Foxd1","Hnf1b","Lef1","Nfatc4","Pbx1","Six1","Sox9","Tbx3"]
GO:0001838	6	embryonic epithelial tube formation	6	35	0.243229	1.40539e-07	9.18801e-07	["Ctnnb1","Hnf1b","Six1","Sox11","Sox8","Sox9"]
GO:0048584	5	positive regulation of response to stimulus	34	1860	12.9259	1.4281e-07	9.30597e-07	["Cebpg","Ctnnb1","Fos","Foxa2","Foxd1","Foxp3","Gata6","Hlx","Hmga1","Hmga2","Irf1","Irf3","Irf7","Jun","Myb","Nfatc2","Nfatc4","Nfkb1","Nfkb2","Nr1h3","Pou5f1","Rara","Rela","Relb","Shox2","Sox11","Sox9","Stat3","Stat5a","Stat5b","Stat6","Tcf7l2","Trp53","Trp73"]
GO:0070663	6	regulation of leukocyte proliferation	11	199	1.38293	1.53059e-07	9.94138e-07	["Bcl6","Cebpb","Ctnnb1","Foxj1","Foxp3","Irf1","Nfatc2","Prdm1","Sox11","Stat5a","Stat5b"]
GO:0006950	3	response to stress	47	3149	21.8836	1.59e-07	1.02937e-06	["Atf4","Bcl6","Cebpa","Cebpb","Cebpg","Ctnnb1","Fos","Fosl2","Foxa3","Foxo1","Foxo3","Foxo4","Gata6","Hmga1","Hmga2","Hnf1a","Irf1","Irf3","Irf4","Irf5","Irf7","Irf8","Irf9","Jun","Klf2","Mecom","Nfatc2","Nfatc4","Nfe2l1","Nfkb1","Nfkb2","Nr2e1","Nr4a1","Pax6","Pou5f1","Rela","Relb","Rxra","Stat3","Stat5b","Stat6","Tbx2","Tbx3","Tcf7l2","Trp53","Trp73","Zfp35"]
GO:2000177	6	regulation of neural precursor cell proliferation	8	87	0.604597	1.66763e-07	1.07511e-06	["Ctnnb1","Foxg1","Foxo1","Foxo3","Nr2e1","Pax6","Sox10","Trp53"]
GO:0010453	6	regulation of cell fate commitment	6	36	0.250178	1.67683e-07	1.07511e-06	["Ctnnb1","Hnf1b","Pax6","Pax7","Pou5f1","Sox17"]
GO:0072175	5	epithelial tube formation	6	36	0.250178	1.67683e-07	1.07511e-06	["Ctnnb1","Hnf1b","Six1","Sox11","Sox8","Sox9"]
GO:0007565	4	female pregnancy	9	121	0.840877	1.74501e-07	1.11524e-06	["Fos","Fosb","Fosl2","Irf1","Junb","Rara","Rxra","Stat5a","Stat5b"]
GO:0050777	6	negative regulation of immune response	9	122	0.847826	1.87291e-07	1.19316e-06	["Bcl6","Foxj1","Foxp3","Hlx","Irf1","Nr1h2","Nr1h3","Stat6","Zfp35"]
GO:0045621	8	positive regulation of lymphocyte differentiation	8	89	0.618496	1.99208e-07	1.26503e-06	["Foxp3","Hlx","Irf1","Myb","Prdm1","Rara","Stat5a","Stat5b"]
GO:0051250	7	negative regulation of lymphocyte activation	9	124	0.861725	2.15337e-07	1.36248e-06	["Bcl6","Cebpb","Foxj1","Foxp3","Hlx","Irf1","Prdm1","Sox11","Zfp35"]
GO:0048384	7	retinoic acid receptor signaling pathway	5	20	0.138988	2.16603e-07	1.36248e-06	["Nr1h2","Rara","Rarg","Rxra","Rxrb"]
GO:0048699	7	generation of neurons	5	20	0.138988	2.16603e-07	1.36248e-06	["Lef1","Nr2e1","Six1","Tcf7","Tcf7l2"]
GO:0034109	5	homotypic cell-cell adhesion	13	304	2.11262	2.20073e-07	1.37996e-06	["Cebpb","Ctnnb1","Foxp1","Foxp3","Irf1","Irf4","Lef1","Mafb","Relb","Stat5a","Stat5b","Tcf7","Trp53"]
GO:0031056	8	regulation of histone modification	9	125	0.868674	2.3068e-07	1.43781e-06	["Arid5a","Bcl6","Ctnnb1","Foxp3","Gfi1b","Jdp2","Myb","Pax7","Trp53"]
GO:0050866	6	negative regulation of cell activation	10	164	1.1397	2.30742e-07	1.43781e-06	["Bcl6","Cebpb","Foxj1","Foxp3","Hlx","Irf1","Nr1h3","Prdm1","Sox11","Zfp35"]
GO:0045088	6	regulation of innate immune response	14	360	2.50178	2.35707e-07	1.46417e-06	["Fos","Irf1","Irf3","Irf7","Jun","Nfatc2","Nfkb1","Nfkb2","Nr1h2","Nr1h3","Rela","Relb","Stat5a","Stat5b"]
GO:0060537	5	muscle tissue development	9	127	0.882573	2.64237e-07	1.63152e-06	["Foxp1","Gata6","Hlx","Nr2f2","Pax7","Six1","Sox9","Tbx2","Tbx5"]
GO:0002237	5	response to molecule of bacterial origin	15	421	2.92569	2.64283e-07	1.63152e-06	["Cebpb","Fos","Foxp1","Irf3","Irf5","Irf8","Jun","Junb","Jund","Nfkb1","Nfkb2","Nr1h3","Rara","Rela","Stat5b"]
GO:0001822	4	kidney development	10	167	1.16055	2.73127e-07	1.68091e-06	["Ctnnb1","Foxc1","Foxd1","Hnf1b","Irx2","Irx3","Lef1","Pou3f3","Six1","Sox11"]
GO:0031641	5	regulation of myelination	6	39	0.271026	2.76087e-07	1.6887e-06	["Ctnnb1","Rara","Rarg","Rxra","Rxrb","Tcf7l2"]
GO:0046632	7	alpha-beta T cell differentiation	6	39	0.271026	2.76087e-07	1.6887e-06	["Foxp1","Foxp3","Irf1","Lef1","Relb","Tcf7"]
GO:0042659	7	regulation of cell fate specification	5	21	0.145937	2.82701e-07	1.72387e-06	["Ctnnb1","Hnf1b","Pax6","Pou5f1","Sox17"]
GO:0061448	5	connective tissue development	7	64	0.444761	3.0477e-07	1.85278e-06	["Foxa2","Foxd1","Hmga2","Rara","Rarg","Sox8","Sox9"]
GO:0030856	6	regulation of epithelial cell differentiation	9	130	0.903421	3.22507e-07	1.95142e-06	["Ctnnb1","Foxa3","Foxj1","Foxp1","Pax6","Sox9","Stat5a","Stat5b","Tbx3"]
GO:0014014	8	negative regulation of gliogenesis	6	40	0.277976	3.22953e-07	1.95142e-06	["Ctnnb1","Dlx1","Dlx2","Hmga2","Nr2e1","Sox11"]
GO:0046636	9	negative regulation of alpha-beta T cell activation	5	22	0.152887	3.63801e-07	2.1916e-06	["Bcl6","Foxp3","Hlx","Irf1","Zfp35"]
GO:0035148	4	tube formation	9	134	0.931219	4.17351e-07	2.49909e-06	["Ctnnb1","Hnf1b","Rara","Rarg","Sall4","Six1","Sox11","Sox8","Sox9"]
GO:0051591	5	response to cAMP	9	134	0.931219	4.17351e-07	2.49909e-06	["Egr2","Fos","Fosb","Fosl2","Gata6","Jun","Junb","Jund","Rela"]
GO:0045620	8	negative regulation of lymphocyte differentiation	6	42	0.291875	4.3634e-07	2.60498e-06	["Bcl6","Foxj1","Foxp3","Hlx","Irf1","Zfp35"]
GO:0050778	6	positive regulation of immune response	17	568	3.94726	4.76295e-07	2.83502e-06	["Fos","Foxp3","Hlx","Irf1","Irf3","Irf7","Jun","Myb","Nfatc2","Nfkb1","Nfkb2","Rara","Rela","Relb","Stat5a","Stat5b","Stat6"]
GO:0002573	7	myeloid leukocyte differentiation	8	101	0.701889	5.31323e-07	3.15315e-06	["Cebpa","Ctnnb1","Foxp1","Irf4","Jun","Junb","Lef1","Relb"]
GO:0033044	6	regulation of chromosome organization	11	227	1.57751	5.71336e-07	3.38054e-06	["Arid5a","Bcl6","Ctnnb1","Foxp3","Gfi1b","Hmga1","Jdp2","Myb","Pax7","Pou5f1","Trp53"]
GO:0023057	5	negative regulation of signaling	25	1182	8.21418	6.3099e-07	3.72247e-06	["Bcl6","Ctnnb1","Dlx1","Dlx2","Elf1","Foxo1","Foxo3","Foxp1","Hmga2","Irf1","Irf4","Lef1","Mecom","Nr1h2","Nr1h3","Pou5f1","Prdm1","Rela","Sox10","Sox17","Sox9","Tcf7l2","Trp53","Trp73","Zfp536"]
GO:0048589	3	developmental growth	13	335	2.32805	6.62667e-07	3.89781e-06	["Foxo3","Hnf1b","Hoxd13","Klf2","Pax7","Pou5f1","Rara","Rarg","Sox10","Sox9","Tbx2","Tcf7l2","Trp53"]
GO:0032655	6	regulation of interleukin-12 production	6	45	0.312723	6.65958e-07	3.90565e-06	["Foxp1","Irf1","Irf5","Irf8","Nfkb1","Rela"]
GO:0007283	6	spermatogenesis	15	454	3.15502	6.86283e-07	4.01305e-06	["Bcl6","Foxa3","Foxj1","Hmga1","Hmga2","Hoxa10","Hoxa9","Rara","Sox17","Sox30","Sox8","Sox9","Tbp","Zfp35","Zfp39"]
GO:0048232	5	male gamete generation	15	455	3.16197	7.05471e-07	4.11318e-06	["Bcl6","Foxa3","Foxj1","Hmga1","Hmga2","Hoxa10","Hoxa9","Rara","Sox17","Sox30","Sox8","Sox9","Tbp","Zfp35","Zfp39"]
GO:0001893	4	maternal placenta development	4	11	0.0764433	7.12987e-07	4.13869e-06	["Nr2f2","Prdm1","Rxra","Rxrb"]
GO:0010648	6	negative regulation of cell communication	25	1190	8.26978	7.13996e-07	4.13869e-06	["Bcl6","Ctnnb1","Dlx1","Dlx2","Elf1","Foxo1","Foxo3","Foxp1","Hmga2","Irf1","Irf4","Lef1","Mecom","Nr1h2","Nr1h3","Pou5f1","Prdm1","Rela","Sox10","Sox17","Sox9","Tcf7l2","Trp53","Trp73","Zfp536"]
GO:2000144	7	positive regulation of DNA-templated transcription, initiation	5	25	0.173735	7.21735e-07	4.17142e-06	["Ctnnb1","Hnf1a","Hnf1b","Irf8","Jun"]
GO:0022603	5	regulation of anatomical structure morphogenesis	22	953	6.62277	7.68233e-07	4.42464e-06	["Bcl6","Ctnnb1","Foxa2","Foxc1","Foxj1","Foxo4","Foxp1","Gata6","Hnf1b","Hoxd13","Lef1","Nfatc2","Nfatc4","Nr2e1","Rxra","Shox2","Six1","Sox17","Sox8","Sox9","Tbx2","Tbx5"]
GO:0042476	5	odontogenesis	8	106	0.736636	7.69985e-07	4.42464e-06	["Ctnnb1","Dlx1","Dlx2","Foxc1","Gata6","Lef1","Tcf7l2","Zfp422"]
GO:0042475	6	odontogenesis of dentin-containing tooth	7	74	0.514255	8.33076e-07	4.77343e-06	["Ctnnb1","Dlx1","Dlx2","Foxc1","Gata6","Lef1","Tcf7l2"]
GO:0050896	2	response to stimulus	73	6393	44.4275	8.64386e-07	4.93864e-06	["Atf4","Bcl6","Cebpa","Cebpb","Cebpg","Ctnnb1","Egr2","Fos","Fosb","Fosl2","Foxa2","Foxa3","Foxj1","Foxo1","Foxo3","Foxo4","Foxp1","Foxp3","Gata6","Hmga1","Hmga2","Hnf1a","Hnf1b","Irf1","Irf3","Irf4","Irf5","Irf7","Irf8","Irf9","Irx5","Jun","Junb","Jund","Klf2","Lef1","Mecom","Mnx1","Myb","Nfatc2","Nfatc4","Nfe2l1","Nfil3","Nfkb1","Nfkb2","Nr1h3","Nr2e1","Nr2f2","Nr4a1","Pax6","Pou2f2","Pou5f1",…
GO:0021879	8	forebrain neuron differentiation	5	26	0.180684	8.88579e-07	5.04794e-06	["Dlx1","Dlx2","Lef1","Lhx5","Uncx"]
GO:0032673	6	regulation of interleukin-4 production	5	26	0.180684	8.88579e-07	5.04794e-06	["Cebpb","Foxp3","Irf4","Lef1","Rara"]
GO:0014706	6	striated muscle tissue development	8	109	0.757484	9.53076e-07	5.39896e-06	["Foxp1","Gata6","Hlx","Nr2f2","Pax7","Six1","Tbx2","Tbx5"]
GO:0032496	5	response to lipopolysaccharide	14	405	2.8145	9.65457e-07	5.4536e-06	["Cebpb","Fos","Foxp1","Irf3","Irf8","Jun","Junb","Jund","Nfkb1","Nfkb2","Nr1h3","Rara","Rela","Stat5b"]
GO:0003151	4	outflow tract morphogenesis	6	48	0.333571	9.86257e-07	5.55535e-06	["Jun","Six1","Sox11","Sox17","Tbx2","Tbx3"]
GO:0038061	7	NIK/NF-kappaB signaling	4	12	0.0833927	1.06369e-06	5.97466e-06	["Nfkb1","Nfkb2","Rela","Relb"]
GO:0043372	11	positive regulation of CD4-positive, alpha-beta T cell differentiation	5	27	0.187634	1.08443e-06	6.07403e-06	["Foxp3","Hlx","Irf1","Myb","Rara"]
GO:0009953	6	dorsal/ventral pattern formation	7	77	0.535103	1.09404e-06	6.07663e-06	["Ctnnb1","Foxa2","Foxg1","Lhx3","Mnx1","Pax6","Pax7"]
GO:0035666	9	TRIF-dependent toll-like receptor signaling pathway	7	77	0.535103	1.09404e-06	6.07663e-06	["Fos","Irf3","Irf7","Jun","Nfkb1","Nfkb2","Rela"]
GO:0045582	9	positive regulation of T cell differentiation	7	77	0.535103	1.09404e-06	6.07663e-06	["Foxp3","Hlx","Irf1","Myb","Rara","Stat5a","Stat5b"]
GO:0051251	7	positive regulation of lymphocyte activation	11	244	1.69565	1.16315e-06	6.44258e-06	["Bcl6","Foxp3","Hlx","Irf1","Myb","Nfatc2","Prdm1","Rara","Stat5a","Stat5b","Stat6"]
GO:0044703	3	multi-organism reproductive process	10	197	1.36903	1.24512e-06	6.87749e-06	["Fos","Fosb","Fosl2","Irf1","Junb","Rara","Rxra","Stat3","Stat5a","Stat5b"]
GO:0006338	6	chromatin remodeling	9	153	1.06326	1.27419e-06	6.99925e-06	["Cebpg","Ctnnb1","Foxp3","Hmga1","Hmga2","Hnf1a","Myb","Pax7","Sox9"]
GO:0008406	4	gonad development	9	153	1.06326	1.27419e-06	6.99925e-06	["Gata6","Hmga2","Hoxa10","Hoxa9","Irx5","Lhx9","Rara","Sox8","Sox9"]
GO:0016477	4	cell migration	19	754	5.23984	1.30233e-06	7.13419e-06	["Arx","Ctnnb1","Foxc1","Foxg1","Foxj1","Lef1","Mnx1","Nfatc2","Nr2e1","Nr2f2","Nr4a1","Pax6","Pou3f3","Six1","Sox10","Sox17","Sox8","Stat5b","Tbx5"]
GO:0060534	6	trachea cartilage development	3	4	0.0277976	1.3102e-06	7.13806e-06	["Rara","Rarg","Sox9"]
GO:2000741	8	positive regulation of mesenchymal stem cell differentiation	3	4	0.0277976	1.3102e-06	7.13806e-06	["Sox5","Sox6","Sox9"]
GO:0001568	4	blood vessel development	8	114	0.792231	1.34079e-06	7.26504e-06	["Cdx2","Foxc1","Foxo1","Junb","Nr2f2","Pax6","Tbx3","Tcf7l2"]
GO:0050864	7	regulation of B cell activation	8	114	0.792231	1.34079e-06	7.26504e-06	["Bcl6","Foxj1","Foxp3","Nfatc2","Prdm1","Stat5a","Stat5b","Stat6"]
GO:0002756	8	MyD88-independent toll-like receptor signaling pathway	7	80	0.555952	1.42027e-06	7.67482e-06	["Fos","Irf3","Irf7","Jun","Nfkb1","Nfkb2","Rela"]
GO:0009966	5	regulation of signal transduction	39	2551	17.7279	1.43695e-06	7.74399e-06	["Bcl6","Ctnnb1","Dlx1","Dlx2","Elf1","Foxa2","Foxd1","Foxo1","Foxo3","Foxp1","Gata6","Hmga2","Hnf1a","Hnf1b","Irf1","Irf3","Irf4","Irf7","Lef1","Mecom","Nfatc4","Nfkb1","Nr1h2","Nr1h3","Pou5f1","Prdm1","Rara","Rela","Rxrb","Shox2","Sox10","Sox11","Sox17","Sox9","Stat3","Tcf7l2","Trp53","Trp73","Zfp536"]
GO:0030111	6	regulation of Wnt signaling pathway	12	303	2.10567	1.46591e-06	7.87876e-06	["Ctnnb1","Foxo1","Foxo3","Hnf1a","Hnf1b","Lef1","Nfkb1","Pou5f1","Sox10","Sox17","Sox9","Tcf7l2"]
GO:0031128	6	developmental induction	5	29	0.201532	1.57743e-06	8.45534e-06	["Ctnnb1","Pou2f1","Six1","Sox8","Sox9"]
GO:0034138	8	toll-like receptor 3 signaling pathway	7	83	0.5768	1.82424e-06	9.75208e-06	["Fos","Irf3","Irf7","Jun","Nfkb1","Nfkb2","Rela"]
GO:0008045	7	motor neuron axon guidance	5	30	0.208482	1.88233e-06	9.98235e-06	["Egr2","Foxp1","Lhx3","Lhx9","Mnx1"]
GO:0035710	7	CD4-positive, alpha-beta T cell activation	5	30	0.208482	1.88233e-06	9.98235e-06	["Cebpb","Foxp1","Foxp3","Lef1","Relb"]
GO:0045168	5	cell-cell signaling involved in cell fate commitment	5	30	0.208482	1.88233e-06	9.98235e-06	["Ctnnb1","Pou2f1","Six1","Sox8","Sox9"]
GO:0002697	5	regulation of immune effector process	14	429	2.98129	1.89812e-06	1.00394e-05	["Bcl6","Foxj1","Foxp1","Foxp3","Hlx","Irf1","Irf3","Irf4","Myb","Rara","Stat5a","Stat5b","Stat6","Zfp35"]
GO:0009612	4	response to mechanical stimulus	11	258	1.79294	2.00241e-06	1.0563e-05	["Ctnnb1","Fos","Fosb","Fosl2","Irf1","Jun","Junb","Jund","Nfkb1","Rela","Sox9"]
GO:0080134	5	regulation of response to stress	26	1347	9.36083	2.02289e-06	1.06428e-05	["Atf4","Bcl6","Cebpg","Fos","Foxa2","Foxo1","Foxp1","Foxp3","Hmga1","Hmga2","Irf1","Irf3","Irf7","Jun","Mecom","Nfatc2","Nfkb1","Nfkb2","Nr1h2","Nr1h3","Rela","Relb","Stat5a","Stat5b","Trp53","Trp73"]
GO:0050769	7	positive regulation of neurogenesis	14	432	3.00214	2.0587e-06	1.08028e-05	["Bcl6","Ctnnb1","Foxa2","Foxg1","Hoxd3","Irx3","Pax6","Rara","Rela","Shox2","Sox10","Sox11","Sox8","Trp73"]
GO:0007276	4	gamete generation	15	497	3.45385	2.10762e-06	1.10304e-05	["Bcl6","Foxa3","Foxj1","Hmga1","Hmga2","Hoxa10","Hoxa9","Rara","Sox17","Sox30","Sox8","Sox9","Tbp","Zfp35","Zfp39"]
GO:0030900	4	forebrain development	7	85	0.590699	2.14366e-06	1.11897e-05	["Arx","Ctnnb1","Foxg1","Mecom","Nr2f2","Pax6","Trp73"]
GO:0045686	9	negative regulation of glial cell differentiation	5	31	0.215431	2.23177e-06	1.15588e-05	["Ctnnb1","Dlx1","Dlx2","Hmga2","Nr2e1"]
GO:2000142	6	regulation of DNA-templated transcription, initiation	5	31	0.215431	2.23177e-06	1.15588e-05	["Ctnnb1","Hnf1a","Hnf1b","Irf8","Jun"]
GO:2000516	10	positive regulation of CD4-positive, alpha-beta T cell activation	5	31	0.215431	2.23177e-06	1.15588e-05	["Foxp3","Hlx","Irf1","Myb","Rara"]
GO:0001818	6	negative regulation of cytokine production	10	211	1.46632	2.31309e-06	1.1949e-05	["Bcl6","Foxj1","Foxp3","Gata6","Irf3","Klf2","Lef1","Nfkb1","Rara","Relb"]
GO:0023051	4	regulation of signaling	42	2916	20.2644	2.3767e-06	1.22458e-05	["Bcl6","Ctnnb1","Dlx1","Dlx2","Egr2","Elf1","Foxa2","Foxd1","Foxo1","Foxo3","Foxp1","Gata6","Hmga2","Hnf1a","Hnf1b","Irf1","Irf3","Irf4","Irf7","Lef1","Mecom","Nfatc4","Nfkb1","Nr1h2","Nr1h3","Nr2e1","Pax6","Pou5f1","Prdm1","Rara","Rela","Rxrb","Shox2","Sox10","Sox11","Sox17","Sox9","Stat3","Tcf7l2","Trp53","Trp73","Zfp536"]
GO:0060411	4	cardiac septum morphogenesis	6	56	0.389166	2.49269e-06	1.28104e-05	["Gata6","Rara","Sox11","Tbx2","Tbx3","Tbx5"]
GO:0045638	7	negative regulation of myeloid cell differentiation	7	87	0.604597	2.50852e-06	1.28586e-05	["Ctnnb1","Hoxa9","Mafb","Meis1","Rara","Stat5a","Stat5b"]
GO:0060487	7	lung epithelial cell differentiation	5	32	0.222381	2.63028e-06	1.33955e-05	["Foxa2","Foxp1","Gata6","Klf2","Sox9"]
GO:0090398	5	cellular senescence	5	32	0.222381	2.63028e-06	1.33955e-05	["Hmga1","Hmga2","Tbx2","Tbx3","Trp53"]
GO:0046683	5	response to organophosphorus	9	167	1.16055	2.63342e-06	1.33955e-05	["Egr2","Fos","Fosb","Fosl2","Gata6","Jun","Junb","Jund","Rela"]
GO:0010646	5	regulation of cell communication	42	2933	20.3826	2.7626e-06	1.39835e-05	["Bcl6","Ctnnb1","Dlx1","Dlx2","Egr2","Elf1","Foxa2","Foxd1","Foxo1","Foxo3","Foxp1","Gata6","Hmga2","Hnf1a","Hnf1b","Irf1","Irf3","Irf4","Irf7","Lef1","Mecom","Nfatc4","Nfkb1","Nr1h2","Nr1h3","Nr2e1","Pax6","Pou5f1","Prdm1","Rara","Rela","Rxrb","Shox2","Sox10","Sox11","Sox17","Sox9","Stat3","Tcf7l2","Trp53","Trp73","Zfp536"]
GO:0002699	6	positive regulation of immune effector process	9	168	1.1675	2.76614e-06	1.39835e-05	["Foxp1","Foxp3","Hlx","Irf1","Myb","Rara","Stat5a","Stat5b","Stat6"]
GO:0032570	6	response to progesterone	6	57	0.396115	2.77005e-06	1.39835e-05	["Fos","Fosb","Fosl2","Junb","Nr1h3","Rela"]
GO:0030155	5	regulation of cell adhesion	17	647	4.49626	2.80868e-06	1.41427e-05	["Bcl6","Cebpb","Ctnnb1","Foxa2","Foxj1","Foxp3","Hlx","Irf1","Irf4","Lef1","Myb","Rara","Sox13","Sox9","Stat5a","Stat5b","Zfp35"]
GO:0008584	5	male gonad development	8	126	0.875624	2.8522e-06	1.43256e-05	["Gata6","Hmga2","Hoxa10","Hoxa9","Lhx9","Rara","Sox8","Sox9"]
GO:0038095	9	Fc-epsilon receptor signaling pathway	9	170	1.1814	3.04893e-06	1.52753e-05	["Fos","Foxo1","Foxo3","Foxo4","Jun","Nfatc2","Nfkb1","Nr4a1","Rela"]
GO:0060485	5	mesenchyme development	6	58	0.403065	3.07205e-06	1.53526e-05	["Ctnnb1","Foxd1","Meox1","Rxra","Six1","Tbx5"]
GO:0033554	4	cellular response to stress	28	1559	10.8341	3.12497e-06	1.5578e-05	["Atf4","Bcl6","Cebpb","Fos","Foxa3","Foxo1","Foxo3","Foxo4","Gata6","Hmga1","Hmga2","Irf3","Irf7","Jun","Klf2","Nfatc2","Nfatc4","Nfe2l1","Nfkb1","Rela","Relb","Rxra","Stat6","Tbx2","Tbx3","Tcf7l2","Trp53","Trp73"]
GO:0050868	8	negative regulation of T cell activation	7	90	0.625445	3.1521e-06	1.5674e-05	["Bcl6","Cebpb","Foxj1","Foxp3","Hlx","Irf1","Zfp35"]
GO:0045351	7	type I interferon biosynthetic process	3	5	0.034747	3.25875e-06	1.6084e-05	["Irf3","Irf7","Irf9"]
GO:0048341	6	paraxial mesoderm formation	3	5	0.034747	3.25875e-06	1.6084e-05	["Foxc1","Hnf1a","Lef1"]
GO:0048619	5	embryonic hindgut morphogenesis	3	5	0.034747	3.25875e-06	1.6084e-05	["Hoxd13","Tcf7","Tcf7l2"]
GO:0002696	6	positive regulation of leukocyte activation	11	272	1.89024	3.33287e-06	1.64093e-05	["Bcl6","Foxp3","Hlx","Irf1","Myb","Nfatc2","Prdm1","Rara","Stat5a","Stat5b","Stat6"]
GO:0090183	6	regulation of kidney development	6	59	0.410014	3.40032e-06	1.67001e-05	["Ctnnb1","Foxd1","Hnf1b","Six1","Sox8","Sox9"]
GO:0048545	5	response to steroid hormone	16	586	4.07234	3.44874e-06	1.68963e-05	["Cebpa","Ctnnb1","Fos","Fosb","Fosl2","Foxj1","Gata6","Junb","Nr1h3","Nr2f2","Rara","Rela","Rxra","Sox30","Stat3","Stat5b"]
GO:0007623	3	circadian rhythm	9	173	1.20225	3.51964e-06	1.71593e-05	["Atf4","Dbp","Fosl2","Hnf1b","Jun","Jund","Nfil3","Relb","Trp53"]
GO:0044706	3	multi-multicellular organism process	9	173	1.20225	3.51964e-06	1.71593e-05	["Fos","Fosb","Fosl2","Irf1","Junb","Rara","Rxra","Stat5a","Stat5b"]
GO:0035116	7	embryonic hindlimb morphogenesis	5	34	0.236279	3.59395e-06	1.74789e-05	["Alx4","Ctnnb1","Mecom","Rarg","Tbx3"]
GO:0002360	6	T cell lineage commitment	4	16	0.11119	3.82704e-06	1.85672e-05	["Foxp3","Irf4","Stat6","Trp53"]
GO:0035914	6	skeletal muscle cell differentiation	6	61	0.423913	4.14264e-06	1.99527e-05	["Egr2","Fos","Hlf","Nr4a1","Sox11","Sox8"]
GO:0045844	7	positive regulation of striated muscle tissue development	6	61	0.423913	4.14264e-06	1.99527e-05	["Foxp1","Gata6","Shox2","Sox17","Tbx2","Tbx5"]
GO:0048636	6	positive regulation of muscle organ development	6	61	0.423913	4.14264e-06	1.99527e-05	["Foxp1","Gata6","Shox2","Sox17","Tbx2","Tbx5"]
GO:0051145	7	smooth muscle cell differentiation	5	35	0.243229	4.16952e-06	1.99856e-05	["Ctnnb1","Gata6","Nfatc4","Six1","Sox9"]
GO:1902692	7	regulation of neuroblast proliferation	5	35	0.243229	4.16952e-06	1.99856e-05	["Ctnnb1","Foxg1","Pax6","Sox10","Trp53"]
GO:0048514	4	blood vessel morphogenesis	7	94	0.653243	4.21941e-06	2.01763e-05	["Ctnnb1","Foxc1","Meis1","Nr2f2","Prdm1","Six1","Tbx2"]
GO:0051101	5	regulation of DNA binding	7	95	0.660192	4.52872e-06	2.16035e-05	["Cebpg","Hmga2","Irf4","Jun","Lef1","Sox11","Zfp90"]
GO:1901863	6	positive regulation of muscle tissue development	6	62	0.430862	4.56034e-06	2.17024e-05	["Foxp1","Gata6","Shox2","Sox17","Tbx2","Tbx5"]
GO:0010720	7	positive regulation of cell development	15	530	3.68318	4.6039e-06	2.18576e-05	["Bcl6","Ctnnb1","Foxa2","Foxg1","Hoxd3","Irx3","Lef1","Pax6","Rara","Rela","Shox2","Sox10","Sox11","Sox8","Trp73"]
GO:0051098	4	regulation of binding	11	282	1.95973	4.7069e-06	2.22935e-05	["Cebpg","Hmga2","Irf4","Jun","Lef1","Nfatc4","Pax7","Rara","Sox11","Tcf7l2","Zfp90"]
GO:0048469	5	cell maturation	8	135	0.938168	4.77204e-06	2.25485e-05	["Cebpa","Ctnnb1","Foxo3","Irx5","Klf2","Pou2f2","Sox10","Sox8"]
GO:0048709	7	oligodendrocyte differentiation	5	36	0.250178	4.81498e-06	2.26976e-05	["Sox10","Sox5","Sox6","Sox8","Sox9"]
GO:0010035	4	response to inorganic substance	16	602	4.18354	4.85193e-06	2.27864e-05	["Cebpa","Ctnnb1","Fos","Fosb","Foxo1","Jun","Junb","Jund","Klf2","Lef1","Nfatc4","Nfkb1","Nr4a1","Rela","Rxra","Stat6"]
GO:1903038	8	negative regulation of leukocyte cell-cell adhesion	7	96	0.667142	4.85667e-06	2.27864e-05	["Bcl6","Cebpb","Foxj1","Foxp3","Hlx","Irf1","Zfp35"]
GO:0050867	6	positive regulation of cell activation	11	283	1.96668	4.86829e-06	2.27872e-05	["Bcl6","Foxp3","Hlx","Irf1","Myb","Nfatc2","Prdm1","Rara","Stat5a","Stat5b","Stat6"]
GO:0007379	5	segment specification	4	17	0.11814	4.97753e-06	2.31357e-05	["Irx2","Irx3","Mafb","Meox1"]
GO:0060038	6	cardiac muscle cell proliferation	4	17	0.11814	4.97753e-06	2.31357e-05	["Ctnnb1","Foxc1","Rxra","Rxrb"]
GO:2000136	6	regulation of cell proliferation involved in heart morphogenesis	4	17	0.11814	4.97753e-06	2.31357e-05	["Ctnnb1","Six1","Sox9","Tbx5"]
GO:0010942	6	positive regulation of cell death	17	676	4.69779	5.02749e-06	2.33135e-05	["Atf4","Bcl6","Ctnnb1","Foxo1","Foxo3","Gata6","Hmga2","Irf1","Irf5","Jun","Nfatc4","Nr4a1","Rarg","Rxra","Tcf7l2","Trp53","Trp73"]
GO:0045786	6	negative regulation of cell cycle	14	467	3.24537	5.05584e-06	2.33906e-05	["Cebpa","Ctnnb1","E4f1","Foxc1","Foxk1","Foxo4","Hmga2","Irf1","Irf6","Nr2f2","Sox11","Tcf7l2","Trp53","Trp73"]
GO:0060828	7	regulation of canonical Wnt signaling pathway	10	231	1.60531	5.18047e-06	2.39117e-05	["Ctnnb1","Foxo1","Foxo3","Lef1","Nfkb1","Pou5f1","Sox10","Sox17","Sox9","Tcf7l2"]
GO:0051246	6	regulation of protein metabolic process	37	2488	17.2901	5.51914e-06	2.53775e-05	["Arid5a","Bcl6","Cebpa","Cebpb","Cebpg","Ctnnb1","Foxj1","Foxo1","Foxo3","Foxp3","Gfi1b","Irf1","Irf3","Irf4","Jdp2","Jun","Klf2","Lef1","Mecom","Myb","Nfkb1","Nr1h2","Nr1h3","Nr2f2","Nr4a1","Pax6","Pax7","Rara","Rela","Rxra","Sox17","Sox9","Stat5a","Stat5b","Tcf7l2","Trp53","Trp73"]
GO:0045646	5	regulation of erythrocyte differentiation	5	37	0.257128	5.53623e-06	2.53775e-05	["Foxo3","Gfi1b","Mafb","Stat5a","Stat5b"]
GO:0060043	6	regulation of cardiac muscle cell proliferation	5	37	0.257128	5.53623e-06	2.53775e-05	["Foxp1","Gata6","Tbx2","Tbx5","Trp73"]
GO:0045089	7	positive regulation of innate immune response	11	289	2.00837	5.94214e-06	2.71758e-05	["Fos","Irf3","Irf7","Jun","Nfatc2","Nfkb1","Nfkb2","Rela","Relb","Stat5a","Stat5b"]
GO:0002764	6	immune response-regulating signaling pathway	14	474	3.29401	5.99011e-06	2.73324e-05	["Fos","Foxo1","Foxo3","Foxo4","Foxp3","Irf3","Irf7","Jun","Nfatc2","Nfkb1","Nfkb2","Nr4a1","Rela","Relb"]
GO:0048870	3	cell motility	19	839	5.83054	6.12981e-06	2.7906e-05	["Arx","Ctnnb1","Foxc1","Foxg1","Foxj1","Lef1","Mnx1","Nfatc2","Nr2e1","Nr2f2","Nr4a1","Pax6","Pou3f3","Six1","Sox10","Sox17","Sox8","Stat5b","Tbx5"]
GO:0016337	4	single organismal cell-cell adhesion	14	476	3.30791	6.2838e-06	2.85419e-05	["Cebpb","Ctnnb1","Foxp1","Foxp3","Irf1","Irf4","Lef1","Mafb","Relb","Sox9","Stat5a","Stat5b","Tcf7","Trp53"]
GO:0002053	8	positive regulation of mesenchymal cell proliferation	5	38	0.264077	6.33945e-06	2.85992e-05	["Ctnnb1","Foxp1","Shox2","Six1","Sox9"]
GO:0030879	5	mammary gland development	5	38	0.264077	6.33945e-06	2.85992e-05	["Hoxa9","Lef1","Sox9","Stat5a","Tbx3"]
GO:0033077	6	T cell differentiation in thymus	5	38	0.264077	6.33945e-06	2.85992e-05	["Ctnnb1","Mafb","Stat5a","Stat5b","Trp53"]
GO:0034142	8	toll-like receptor 4 signaling pathway	7	100	0.694939	6.37307e-06	2.8686e-05	["Fos","Irf3","Irf7","Jun","Nfkb1","Nfkb2","Rela"]
GO:0045087	4	innate immune response	18	764	5.30934	6.40467e-06	2.87633e-05	["Cebpg","Ctnnb1","Fos","Foxo1","Foxo3","Foxo4","Irf1","Irf3","Irf5","Irf7","Jun","Nfatc2","Nfkb1","Nfkb2","Nr4a1","Rela","Relb","Stat6"]
GO:0090343	6	positive regulation of cell aging	3	6	0.0416964	6.4842e-06	2.89899e-05	["Hmga1","Hmga2","Trp53"]
GO:2000739	7	regulation of mesenchymal stem cell differentiation	3	6	0.0416964	6.4842e-06	2.89899e-05	["Sox5","Sox6","Sox9"]
GO:0022408	7	negative regulation of cell-cell adhesion	8	141	0.979865	6.58448e-06	2.93724e-05	["Bcl6","Cebpb","Foxj1","Foxp3","Hlx","Irf1","Lef1","Zfp35"]
GO:0022008	6	neurogenesis	6	67	0.465609	7.19449e-06	3.19506e-05	["Foxg1","Lef1","Nr2e1","Six1","Tcf7","Tcf7l2"]
GO:0042108	7	positive regulation of cytokine biosynthetic process	6	67	0.465609	7.19449e-06	3.19506e-05	["Cebpg","Irf1","Irf4","Rela","Stat5a","Stat5b"]
GO:0071496	4	cellular response to external stimulus	11	295	2.05007	7.21735e-06	3.19708e-05	["Atf4","Ctnnb1","Fos","Foxa3","Foxo1","Irf1","Jun","Nfkb1","Sox9","Tcf7l2","Trp53"]
GO:0071594	5	thymocyte aggregation	5	39	0.271026	7.23112e-06	3.19708e-05	["Ctnnb1","Mafb","Stat5a","Stat5b","Trp53"]
GO:0051247	7	positive regulation of protein metabolic process	26	1448	10.0627	7.46424e-06	3.29285e-05	["Arid5a","Bcl6","Cebpa","Cebpg","Ctnnb1","Foxo1","Foxp3","Gfi1b","Irf1","Irf4","Jdp2","Klf2","Myb","Nr1h2","Nr1h3","Pax7","Rara","Rela","Rxra","Sox17","Sox9","Stat5a","Stat5b","Tcf7l2","Trp53","Trp73"]
GO:1901701	5	cellular response to oxygen-containing compound	20	931	6.46989	7.4834e-06	3.29402e-05	["Cebpb","Ctnnb1","Egr2","Fos","Foxj1","Foxo1","Irf1","Irf3","Irf8","Klf2","Nfkb1","Nr1h3","Pax6","Rara","Rarg","Rela","Rxra","Rxrb","Sox9","Stat6"]
GO:0014855	5	striated muscle cell proliferation	4	19	0.132038	8.0189e-06	3.51422e-05	["Ctnnb1","Foxc1","Rxra","Rxrb"]
GO:0032332	7	positive regulation of chondrocyte differentiation	4	19	0.132038	8.0189e-06	3.51422e-05	["Rela","Sox5","Sox6","Sox9"]
GO:0002064	5	epithelial cell development	8	145	1.00766	8.0913e-06	3.53817e-05	["Fosl2","Foxj1","Pax6","Prdm1","Rara","Rarg","Sox8","Sox9"]
GO:0032648	7	regulation of interferon-beta production	5	40	0.277976	8.218e-06	3.57788e-05	["Irf1","Irf3","Irf5","Irf7","Relb"]
GO:0048713	10	regulation of oligodendrocyte differentiation	5	40	0.277976	8.218e-06	3.57788e-05	["Ctnnb1","Dlx1","Dlx2","Tcf7l2","Trp73"]
GO:0002698	6	negative regulation of immune effector process	7	104	0.722737	8.26382e-06	3.58219e-05	["Bcl6","Foxj1","Foxp3","Hlx","Irf1","Irf3","Zfp35"]
GO:0034111	8	negative regulation of homotypic cell-cell adhesion	7	104	0.722737	8.26382e-06	3.58219e-05	["Bcl6","Cebpb","Foxj1","Foxp3","Hlx","Irf1","Zfp35"]
GO:0051248	7	negative regulation of protein metabolic process	21	1024	7.11618	8.8145e-06	3.81261e-05	["Cebpa","Ctnnb1","Foxj1","Foxo1","Foxp3","Gfi1b","Irf1","Irf3","Jun","Lef1","Mecom","Nfkb1","Nr1h2","Nr1h3","Nr2f2","Nr4a1","Pax6","Rara","Rela","Trp53","Trp73"]
GO:0043065	8	positive regulation of apoptotic process	16	634	4.40592	9.28016e-06	4.00168e-05	["Atf4","Bcl6","Ctnnb1","Foxo1","Foxo3","Gata6","Hmga2","Irf5","Jun","Nfatc4","Nr4a1","Rarg","Rxra","Tcf7l2","Trp53","Trp73"]
GO:0050871	8	positive regulation of B cell activation	6	70	0.486458	9.29176e-06	4.00168e-05	["Bcl6","Nfatc2","Prdm1","Stat5a","Stat5b","Stat6"]
GO:0014074	5	response to purine-containing compound	9	196	1.36208	9.69451e-06	4.16613e-05	["Egr2","Fos","Fosb","Fosl2","Gata6","Jun","Junb","Jund","Rela"]
GO:0040007	2	growth	13	429	2.98129	9.94171e-06	4.25677e-05	["Foxo3","Hnf1b","Hoxd13","Klf2","Pax7","Pou5f1","Rara","Rarg","Sox10","Sox9","Tbx2","Tcf7l2","Trp53"]
GO:0009791	4	post-embryonic development	7	107	0.743585	9.96899e-06	4.25677e-05	["Alx4","Mecom","Mnx1","Prdm1","Sox6","Tcf7l2","Trp73"]
GO:0032753	7	positive regulation of interleukin-4 production	4	20	0.138988	9.96947e-06	4.25677e-05	["Cebpb","Foxp3","Irf4","Rara"]
GO:0007507	4	heart development	10	249	1.7304	1.0007e-05	4.26368e-05	["Ctnnb1","Foxc1","Foxp1","Nfatc4","Pou6f1","Rxra","Sall4","Shox2","Sox9","Tbx5"]
GO:0072073	6	kidney epithelium development	6	71	0.493407	1.00916e-05	4.29056e-05	["Foxc1","Hnf1b","Pou3f3","Rara","Six1","Sox9"]
GO:0051962	6	positive regulation of nervous system development	14	497	3.45385	1.02331e-05	4.34143e-05	["Bcl6","Ctnnb1","Foxa2","Foxg1","Hoxd3","Irx3","Pax6","Rara","Rela","Shox2","Sox10","Sox11","Sox8","Trp73"]
GO:0043068	7	positive regulation of programmed cell death	16	640	4.44761	1.043e-05	4.41558e-05	["Atf4","Bcl6","Ctnnb1","Foxo1","Foxo3","Gata6","Hmga2","Irf5","Jun","Nfatc4","Nr4a1","Rarg","Rxra","Tcf7l2","Trp53","Trp73"]
GO:0046638	10	positive regulation of alpha-beta T cell differentiation	5	42	0.291875	1.05059e-05	4.4383e-05	["Foxp3","Hlx","Irf1","Myb","Rara"]
GO:0006325	4	chromatin organization	16	641	4.45456	1.06335e-05	4.48272e-05	["Cebpg","Ctnnb1","Foxa2","Foxa3","Foxp3","Gfi1b","Hmga1","Hmga2","Hnf1a","Irf4","Lef1","Mecom","Myb","Pax7","Sox9","Trp53"]
GO:0006928	4	movement of cell or subcellular component	25	1390	9.65966	1.11432e-05	4.68765e-05	["Arx","Ctnnb1","Egr2","Foxc1","Foxd1","Foxg1","Foxj1","Foxp1","Lef1","Lhx3","Lhx9","Mnx1","Nfatc2","Nr2e1","Nr2f2","Nr4a1","Pax6","Pou3f3","Six1","Sox10","Sox17","Sox8","Stat3","Stat5b","Tbx5"]
GO:0098602	3	single organism cell adhesion	14	501	3.48165	1.11957e-05	4.69983e-05	["Cebpb","Ctnnb1","Foxp1","Foxp3","Irf1","Irf4","Lef1","Mafb","Relb","Sox9","Stat5a","Stat5b","Tcf7","Trp53"]
GO:0048293	7	regulation of isotype switching to IgE isotypes	3	7	0.0486458	1.12894e-05	4.71929e-05	["Bcl6","Foxp3","Stat6"]
GO:0055012	8	ventricular cardiac muscle cell differentiation	3	7	0.0486458	1.12894e-05	4.71929e-05	["Rara","Rxra","Rxrb"]
GO:0071345	6	cellular response to cytokine stimulus	10	253	1.7582	1.14953e-05	4.79533e-05	["Irf1","Klf2","Lef1","Myb","Nfil3","Nfkb1","Rela","Sox9","Stat5a","Tcf7"]
GO:0002768	7	immune response-regulating cell surface receptor signaling pathway	12	371	2.57823	1.15753e-05	4.80859e-05	["Fos","Foxo1","Foxo3","Foxo4","Foxp3","Jun","Nfatc2","Nfkb1","Nfkb2","Nr4a1","Rela","Relb"]
GO:0051090	4	regulation of sequence-specific DNA binding transcription factor activity	12	371	2.57823	1.15753e-05	4.80859e-05	["Cebpg","Fos","Foxa2","Foxj1","Foxp3","Hmga2","Jun","Nfkb1","Nfkb2","Pbx1","Rela","Tcf7l2"]
GO:0034162	8	toll-like receptor 9 signaling pathway	6	73	0.507306	1.18587e-05	4.91604e-05	["Fos","Irf7","Jun","Nfkb1","Nfkb2","Rela"]
GO:0045624	7	positive regulation of T-helper cell differentiation	4	21	0.145937	1.22487e-05	5.0672e-05	["Hlx","Irf1","Myb","Rara"]
GO:0000902	5	cell morphogenesis	10	255	1.7721	1.23085e-05	5.0814e-05	["Bcl6","Ctnnb1","Foxg1","Hmga2","Klf2","Lef1","Mnx1","Sox17","Sox6","Sox9"]
GO:0051707	3	response to other organism	14	507	3.52334	1.27901e-05	5.26932e-05	["Cebpb","Foxp3","Hmga1","Hmga2","Irf1","Irf3","Irf4","Irf5","Irf7","Irf8","Irf9","Mecom","Nfkb1","Rela"]
GO:0010464	7	regulation of mesenchymal cell proliferation	5	44	0.305773	1.32631e-05	5.4417e-05	["Ctnnb1","Foxp1","Shox2","Six1","Sox9"]
GO:0046622	6	positive regulation of organ growth	5	44	0.305773	1.32631e-05	5.4417e-05	["Arx","Gata6","Hlx","Tbx2","Tbx5"]
GO:0002252	3	immune effector process	13	445	3.09248	1.46473e-05	5.99725e-05	["Cebpb","Cebpg","Foxp1","Foxp3","Irf1","Irf3","Irf5","Irf7","Irf9","Lef1","Rela","Relb","Trp53"]
GO:0035137	6	hindlimb morphogenesis	5	45	0.312723	1.48378e-05	6.03938e-05	["Alx4","Ctnnb1","Mecom","Rarg","Tbx3"]
GO:0035050	5	embryonic heart tube development	4	22	0.152887	1.48898e-05	6.03938e-05	["Ctnnb1","Foxc1","Sox17","Tbx3"]
GO:0045076	7	regulation of interleukin-2 biosynthetic process	4	22	0.152887	1.48898e-05	6.03938e-05	["Foxp3","Irf4","Stat5a","Stat5b"]
GO:0072001	5	renal system development	4	22	0.152887	1.48898e-05	6.03938e-05	["Ctnnb1","Mecom","Six1","Sox17"]
GO:0016568	5	chromatin modification	14	514	3.57199	1.49016e-05	6.03938e-05	["Cebpg","Ctnnb1","Foxa2","Foxa3","Foxp3","Gfi1b","Hmga1","Hmga2","Hnf1a","Irf4","Lef1","Myb","Pax7","Sox9"]
GO:0002065	7	columnar/cuboidal epithelial cell differentiation	6	77	0.535103	1.61435e-05	6.52943e-05	["Gata6","Lef1","Pax6","Rxra","Sox10","Sox11"]
GO:0045444	6	fat cell differentiation	7	117	0.813079	1.78936e-05	7.13819e-05	["Cebpa","Cebpb","Egr2","Foxo1","Hmga2","Sox8","Tcf7l2"]
GO:0048660	6	regulation of smooth muscle cell proliferation	7	117	0.813079	1.78936e-05	7.13819e-05	["Ctnnb1","Foxp1","Jun","Stat5b","Tcf7l2","Trp53","Zfp143"]
GO:0033002	4	muscle cell proliferation	4	23	0.159836	1.79272e-05	7.13819e-05	["Ctnnb1","Foxc1","Rxra","Rxrb"]
GO:0036003	7	positive regulation of transcription from RNA polymerase II promoter in response to stress	4	23	0.159836	1.79272e-05	7.13819e-05	["Atf4","Cebpb","Klf2","Trp53"]
GO:0002713	9	negative regulation of B cell mediated immunity	3	8	0.0555952	1.79708e-05	7.13819e-05	["Bcl6","Foxj1","Foxp3"]
GO:0002890	10	negative regulation of immunoglobulin mediated immune response	3	8	0.0555952	1.79708e-05	7.13819e-05	["Bcl6","Foxj1","Foxp3"]
GO:0021546	4	rhombomere development	3	8	0.0555952	1.79708e-05	7.13819e-05	["Egr2","Hoxb3","Mafb"]
GO:0043373	8	CD4-positive, alpha-beta T cell lineage commitment	3	8	0.0555952	1.79708e-05	7.13819e-05	["Foxp3","Irf4","Stat6"]
GO:0045647	6	negative regulation of erythrocyte differentiation	3	8	0.0555952	1.79708e-05	7.13819e-05	["Mafb","Stat5a","Stat5b"]
GO:1901699	5	cellular response to nitrogen compound	14	523	3.63453	1.80656e-05	7.1616e-05	["Cebpb","Ctnnb1","Egr2","Foxj1","Foxo1","Irf1","Irf3","Klf2","Nfkb1","Pax6","Rela","Rxra","Sox9","Stat6"]
GO:0045787	6	positive regulation of cell cycle	11	326	2.2655	1.83562e-05	7.26236e-05	["Foxg1","Gata6","Hmga2","Lef1","Nr2e1","Pbx1","Rara","Stat5a","Stat5b","Tbx3","Trp53"]
GO:0043392	6	negative regulation of DNA binding	5	47	0.326622	1.84218e-05	7.27389e-05	["Hmga2","Jun","Lef1","Sox11","Zfp90"]
GO:0045995	6	regulation of embryonic development	7	118	0.820029	1.89122e-05	7.45277e-05	["Ctnnb1","E4f1","Foxa2","Hnf1b","Six1","Sox17","Tbx2"]
GO:0001658	6	branching involved in ureteric bud morphogenesis	5	48	0.333571	2.04492e-05	8.04255e-05	["Ctnnb1","Foxd1","Pbx1","Six1","Sox9"]
GO:0048639	6	positive regulation of developmental growth	8	165	1.14665	2.07339e-05	8.13848e-05	["Arx","Gata6","Hlx","Hmga2","Stat5a","Stat5b","Tbx2","Tbx5"]
GO:0031063	9	regulation of histone deacetylation	4	24	0.166785	2.13965e-05	8.34924e-05	["Bcl6","Foxp3","Jdp2","Trp53"]
GO:0035994	5	response to muscle stretch	4	24	0.166785	2.13965e-05	8.34924e-05	["Fos","Jun","Nfkb1","Rela"]
GO:0048665	6	neuron fate specification	4	24	0.166785	2.13965e-05	8.34924e-05	["Foxa2","Lhx3","Mnx1","Six1"]
GO:0021766	4	hippocampus development	6	81	0.562901	2.15987e-05	8.41167e-05	["Dlx1","Dlx2","Lef1","Lhx5","Rara","Trp73"]
GO:0031347	6	regulation of defense response	17	757	5.26069	2.1735e-05	8.44827e-05	["Bcl6","Fos","Foxp1","Foxp3","Irf1","Irf3","Irf7","Jun","Nfatc2","Nfkb1","Nfkb2","Nr1h2","Nr1h3","Rela","Relb","Stat5a","Stat5b"]
GO:0048538	5	thymus development	5	49	0.34052	2.2646e-05	8.73426e-05	["Ctnnb1","Mafb","Myb","Pbx1","Six1"]
GO:0048706	6	embryonic skeletal system development	5	49	0.34052	2.2646e-05	8.73426e-05	["Dlx1","Dlx2","Hoxa9","Pax7","Pbx1"]
GO:0071277	7	cellular response to calcium ion	5	49	0.34052	2.2646e-05	8.73426e-05	["Fos","Fosb","Jun","Junb","Jund"]
GO:2000179	7	positive regulation of neural precursor cell proliferation	5	49	0.34052	2.2646e-05	8.73426e-05	["Ctnnb1","Foxg1","Nr2e1","Pax6","Sox10"]
GO:0051147	6	regulation of muscle cell differentiation	8	169	1.17445	2.46351e-05	9.48308e-05	["Ctnnb1","Foxo4","Foxp1","Nfatc2","Shox2","Sox8","Sox9","Tbx3"]
GO:0055021	7	regulation of cardiac muscle tissue growth	5	50	0.34747	2.50219e-05	9.61344e-05	["Foxp1","Gata6","Tbx2","Tbx5","Trp73"]
GO:0002052	8	positive regulation of neuroblast proliferation	4	25	0.173735	2.53345e-05	9.6776e-05	["Ctnnb1","Foxg1","Pax6","Sox10"]
GO:1901522	10	positive regulation of transcription from RNA polymerase II promoter involved in cellular response to chemical stimulus	4	25	0.173735	2.53345e-05	9.6776e-05	["Atf4","Foxa2","Rxra","Trp53"]
GO:2000772	6	regulation of cellular senescence	4	25	0.173735	2.53345e-05	9.6776e-05	["Bcl6","Hmga1","Hmga2","Trp53"]
GO:0002363	7	alpha-beta T cell lineage commitment	3	9	0.0625445	2.68186e-05	0.000101859	["Foxp3","Irf4","Stat6"]
GO:0003266	8	regulation of secondary heart field cardioblast proliferation	3	9	0.0625445	2.68186e-05	0.000101859	["Ctnnb1","Six1","Tbx5"]
GO:0061004	5	pattern specification involved in kidney development	3	9	0.0625445	2.68186e-05	0.000101859	["Foxd1","Irx2","Irx3"]
GO:0007249	7	I-kappaB kinase/NF-kappaB signaling	5	51	0.354419	2.75871e-05	0.000104381	["Irf1","Nfkb1","Nfkb2","Rela","Relb"]
GO:0048844	5	artery morphogenesis	5	51	0.354419	2.75871e-05	0.000104381	["Ctnnb1","Foxc1","Prdm1","Six1","Tbx2"]
GO:0022409	7	positive regulation of cell-cell adhesion	9	224	1.55666	2.8001e-05	0.000105746	["Foxa2","Foxp3","Hlx","Irf1","Lef1","Myb","Rara","Stat5a","Stat5b"]
GO:0002224	7	toll-like receptor signaling pathway	7	126	0.875624	2.89166e-05	0.000108997	["Fos","Irf3","Irf7","Jun","Nfkb1","Nfkb2","Rela"]
GO:1901653	6	cellular response to peptide	9	225	1.56361	2.89967e-05	0.000109093	["Ctnnb1","Foxj1","Foxo1","Irf1","Klf2","Nfkb1","Pax6","Rela","Rxra"]
GO:0021772	4	olfactory bulb development	4	26	0.180684	2.97793e-05	0.00011099	["Arx","Dlx2","Nr2e1","Pax6"]
GO:0032728	8	positive regulation of interferon-beta production	4	26	0.180684	2.97793e-05	0.00011099	["Irf1","Irf3","Irf5","Irf7"]
GO:0043367	8	CD4-positive, alpha-beta T cell differentiation	4	26	0.180684	2.97793e-05	0.00011099	["Foxp1","Foxp3","Lef1","Relb"]
GO:0061037	6	negative regulation of cartilage development	4	26	0.180684	2.97793e-05	0.00011099	["Ctnnb1","Rara","Rarg","Sox9"]
GO:0090189	6	regulation of branching involved in ureteric bud morphogenesis	4	26	0.180684	2.97793e-05	0.00011099	["Hnf1b","Six1","Sox8","Sox9"]
GO:0038093	8	Fc receptor signaling pathway	9	226	1.57056	3.00223e-05	0.000111688	["Fos","Foxo1","Foxo3","Foxo4","Jun","Nfatc2","Nfkb1","Nr4a1","Rela"]
GO:0021700	4	developmental maturation	8	174	1.20919	3.036e-05	0.000112562	["Cebpa","Ctnnb1","Foxo3","Irx5","Klf2","Pou2f2","Sox10","Sox8"]
GO:0045639	7	positive regulation of myeloid cell differentiation	6	86	0.597648	3.04093e-05	0.000112562	["Fos","Foxo3","Gfi1b","Jun","Lef1","Stat5a"]
GO:0030097	5	hemopoiesis	7	127	0.882573	3.04269e-05	0.000112562	["Ctnnb1","Gfi1b","Hoxa9","Hoxb3","Meis1","Pbx1","Sox6"]
GO:0070741	6	response to interleukin-6	4	27	0.187634	3.47697e-05	0.00012839	["Foxa2","Myb","Nfkb1","Rela"]
GO:0009615	4	response to virus	9	231	1.60531	3.56243e-05	0.000131303	["Foxp3","Hmga1","Hmga2","Irf1","Irf3","Irf5","Irf7","Irf9","Rela"]
GO:0002819	6	regulation of adaptive immune response	7	131	0.910371	3.71323e-05	0.000136608	["Bcl6","Foxj1","Foxp3","Hlx","Irf1","Irf7","Stat6"]
GO:0003264	7	regulation of cardioblast proliferation	3	10	0.0694939	3.81167e-05	0.000138948	["Ctnnb1","Six1","Tbx5"]
GO:0032825	9	positive regulation of natural killer cell differentiation	3	10	0.0694939	3.81167e-05	0.000138948	["Irf1","Stat5a","Stat5b"]
GO:0043369	7	CD4-positive or CD8-positive, alpha-beta T cell lineage commitment	3	10	0.0694939	3.81167e-05	0.000138948	["Foxp3","Irf4","Stat6"]
GO:0045075	7	regulation of interleukin-12 biosynthetic process	3	10	0.0694939	3.81167e-05	0.000138948	["Irf1","Nfkb1","Rela"]
GO:0045586	9	regulation of gamma-delta T cell differentiation	3	10	0.0694939	3.81167e-05	0.000138948	["Sox13","Stat5a","Stat5b"]
GO:0007517	5	muscle organ development	7	132	0.91732	3.89856e-05	0.000141856	["Alx4","Foxk1","Foxo4","Mnx1","Pax7","Pou6f1","Sox6"]
GO:1901214	6	regulation of neuron death	10	292	2.02922	3.9232e-05	0.000142493	["Atf4","Cebpb","Ctnnb1","Dlx1","Foxo3","Jun","Six1","Stat3","Trp53","Trp73"]
GO:0097305	5	response to alcohol	13	490	3.4052	3.98566e-05	0.000144498	["Ctnnb1","Fos","Fosb","Fosl2","Foxj1","Junb","Nr2f2","Pax6","Rara","Rxra","Stat3","Stat5a","Stat5b"]
GO:0022612	4	gland morphogenesis	4	28	0.194583	4.03458e-05	0.000146006	["Hoxd13","Pax6","Sox9","Stat6"]
GO:0042493	4	response to drug	14	563	3.91251	4.04575e-05	0.000146145	["Ctnnb1","Fos","Fosb","Fosl2","Gata6","Hnf1b","Jun","Junb","Jund","Nfatc2","Pax6","Rela","Stat3","Trp53"]
GO:0071248	6	cellular response to metal ion	7	133	0.924269	4.09142e-05	0.000147528	["Cebpa","Fos","Fosb","Jun","Junb","Jund","Nfatc4"]
GO:0043010	6	camera-type eye development	6	92	0.639344	4.45691e-05	0.000160417	["Foxc1","Nr2e1","Pax6","Rara","Rarg","Rxra"]
GO:0042036	7	negative regulation of cytokine biosynthetic process	4	29	0.201532	4.65487e-05	0.000166661	["Foxj1","Foxp3","Irf3","Nfkb1"]
GO:0061217	7	regulation of mesonephros development	4	29	0.201532	4.65487e-05	0.000166661	["Hnf1b","Six1","Sox8","Sox9"]
GO:0050678	6	regulation of epithelial cell proliferation	10	298	2.07092	4.65549e-05	0.000166661	["Ctnnb1","Foxp1","Jun","Nr2f2","Nr4a1","Pax6","Six1","Sox11","Sox9","Tcf7l2"]
GO:0040011	2	locomotion	19	973	6.76176	4.75161e-05	0.00016846	["Arx","Ctnnb1","Foxc1","Foxg1","Foxj1","Lef1","Mnx1","Nfatc2","Nr2e1","Nr2f2","Nr4a1","Pax6","Pou3f3","Six1","Sox10","Sox17","Sox8","Stat5b","Tbx5"]
GO:0002763	8	positive regulation of myeloid leukocyte differentiation	5	57	0.396115	4.75517e-05	0.00016846	["Fos","Gfi1b","Jun","Lef1","Stat5a"]
GO:0035282	6	segmentation	5	57	0.396115	4.75517e-05	0.00016846	["Egr2","Foxc1","Lef1","Mafb","Trp53"]
GO:0002758	5	innate immune response-activating signal transduction	9	240	1.66785	4.79479e-05	0.00016846	["Fos","Irf3","Irf7","Jun","Nfatc2","Nfkb1","Nfkb2","Rela","Relb"]
GO:0007493	6	endodermal cell fate determination	2	2	0.0138988	4.79866e-05	0.00016846	["Gata6","Sox17"]
GO:0021893	7	cerebral cortex GABAergic interneuron fate commitment	2	2	0.0138988	4.79866e-05	0.00016846	["Dlx1","Dlx2"]
GO:0035565	6	regulation of pronephros size	2	2	0.0138988	4.79866e-05	0.00016846	["Hnf1a","Hnf1b"]
GO:0039530	5	MDA-5 signaling pathway	2	2	0.0138988	4.79866e-05	0.00016846	["Irf3","Irf7"]
GO:0044334	9	canonical Wnt signaling pathway involved in positive regulation of epithelial to mesenchymal transition	2	2	0.0138988	4.79866e-05	0.00016846	["Ctnnb1","Tcf7l2"]
GO:0090182	8	regulation of secretion of lysosomal enzymes	2	2	0.0138988	4.79866e-05	0.00016846	["Nr1h2","Nr1h3"]
GO:0090402	6	oncogene-induced cell senescence	2	2	0.0138988	4.79866e-05	0.00016846	["Hmga1","Hmga2"]
GO:0060070	8	canonical Wnt signaling pathway	6	94	0.653243	5.03142e-05	0.000176321	["Ctnnb1","Lef1","Rarg","Sox17","Tcf7","Tcf7l2"]
GO:0030858	7	positive regulation of epithelial cell differentiation	5	58	0.403065	5.17478e-05	0.00017953	["Ctnnb1","Foxa3","Foxj1","Pax6","Sox9"]
GO:0046635	9	positive regulation of alpha-beta T cell activation	5	58	0.403065	5.17478e-05	0.00017953	["Foxp3","Hlx","Irf1","Myb","Rara"]
GO:0060420	6	regulation of heart growth	5	58	0.403065	5.17478e-05	0.00017953	["Foxp1","Gata6","Tbx2","Tbx5","Trp73"]
GO:0042129	8	regulation of T cell proliferation	7	138	0.959016	5.17701e-05	0.00017953	["Cebpb","Ctnnb1","Foxj1","Foxp3","Irf1","Stat5a","Stat5b"]
GO:0048872	5	homeostasis of number of cells	7	138	0.959016	5.17701e-05	0.00017953	["Foxp3","Klf2","Mecom","Myb","Sox9","Stat5a","Stat5b"]
GO:0061061	4	muscle structure development	7	138	0.959016	5.17701e-05	0.00017953	["Alx4","Foxk1","Foxo4","Mnx1","Pax7","Pou6f1","Sox6"]
GO:0001754	8	eye photoreceptor cell differentiation	3	11	0.0764433	5.21431e-05	0.000179885	["Sox8","Sox9","Stat3"]
GO:0046643	8	regulation of gamma-delta T cell activation	3	11	0.0764433	5.21431e-05	0.000179885	["Sox13","Stat5a","Stat5b"]
GO:0060742	4	epithelial cell differentiation involved in prostate gland development	3	11	0.0764433	5.21431e-05	0.000179885	["Ctnnb1","Rxra","Stat5a"]
GO:0061036	6	positive regulation of cartilage development	4	30	0.208482	5.34205e-05	0.000183973	["Rela","Sox5","Sox6","Sox9"]
GO:0002218	4	activation of innate immune response	9	245	1.7026	5.62298e-05	0.000193314	["Fos","Irf3","Irf7","Jun","Nfatc2","Nfkb1","Nfkb2","Rela","Relb"]
GO:0042733	5	embryonic digit morphogenesis	5	60	0.416964	6.09943e-05	0.000208322	["Alx4","Ctnnb1","Hoxd13","Tbx2","Tbx3"]
GO:0043618	6	regulation of transcription from RNA polymerase II promoter in response to stress	5	60	0.416964	6.09943e-05	0.000208322	["Atf4","Cebpb","Jun","Klf2","Trp53"]
GO:0032735	7	positive regulation of interleukin-12 production	4	31	0.215431	6.1004e-05	0.000208322	["Irf1","Irf5","Irf8","Rela"]
GO:1901215	7	negative regulation of neuron death	8	192	1.33428	6.1013e-05	0.000208322	["Atf4","Cebpb","Ctnnb1","Dlx1","Jun","Six1","Stat3","Trp73"]
GO:0043588	5	skin development	5	61	0.423913	6.60703e-05	0.000225204	["Ctnnb1","Irf6","Lef1","Sox21","Tcf7l2"]
GO:0046530	7	photoreceptor cell differentiation	3	12	0.0833927	6.91696e-05	0.000235153	["Sox8","Sox9","Stat3"]
GO:0031062	8	positive regulation of histone methylation	4	32	0.222381	6.93431e-05	0.000235153	["Ctnnb1","Gfi1b","Myb","Pax7"]
GO:0090342	5	regulation of cell aging	4	32	0.222381	6.93431e-05	0.000235153	["Bcl6","Hmga1","Hmga2","Trp53"]
GO:0065008	3	regulation of biological quality	39	3015	20.9524	7.23709e-05	0.000245004	["Cebpa","Ctnnb1","Egr2","Foxa3","Foxc1","Foxo1","Foxo3","Foxp3","Gata6","Hmga2","Hnf1a","Hnf1b","Irf1","Irf2","Irx5","Jun","Klf2","Lef1","Mafk","Mecom","Myb","Nfatc4","Nr1h2","Nr1h3","Nr2e1","Pax6","Rara","Rarg","Rxra","Sox17","Sox8","Sox9","Stat3","Stat5a","Stat5b","Tbx3","Tcf7l2","Trp53","Trp73"]
GO:0007050	5	cell cycle arrest	7	146	1.01461	7.39697e-05	0.000249992	["E4f1","Foxo4","Irf1","Irf6","Tcf7l2","Trp53","Trp73"]
GO:0070670	6	response to interleukin-4	4	33	0.22933	7.84825e-05	0.000264795	["Lef1","Nfil3","Stat5b","Tcf7"]
GO:0055024	7	regulation of cardiac muscle tissue development	5	64	0.444761	8.32707e-05	0.000280476	["Foxp1","Gata6","Tbx2","Tbx5","Trp73"]
GO:0002221	6	pattern recognition receptor signaling pathway	7	149	1.03546	8.40731e-05	0.000282701	["Fos","Irf3","Irf7","Jun","Nfkb1","Nfkb2","Rela"]
GO:0031349	6	positive regulation of defense response	11	388	2.69636	8.8706e-05	0.000296155	["Fos","Irf3","Irf7","Jun","Nfatc2","Nfkb1","Nfkb2","Rela","Relb","Stat5a","Stat5b"]
GO:0021602	4	cranial nerve morphogenesis	3	13	0.0903421	8.9462e-05	0.000296155	["Hoxb3","Hoxd3","Six1"]
GO:0031065	8	positive regulation of histone deacetylation	3	13	0.0903421	8.9462e-05	0.000296155	["Bcl6","Jdp2","Trp53"]
GO:0032656	6	regulation of interleukin-13 production	3	13	0.0903421	8.9462e-05	0.000296155	["Irf4","Lef1","Rara"]
GO:0048484	5	enteric nervous system development	3	13	0.0903421	8.9462e-05	0.000296155	["Hlx","Sox10","Sox8"]
GO:0048505	6	regulation of timing of cell differentiation	3	13	0.0903421	8.9462e-05	0.000296155	["Nr2e1","Pax6","Sox5"]
GO:0060324	4	face development	3	13	0.0903421	8.9462e-05	0.000296155	["Hoxb3","Rara","Rarg"]
GO:1990440	6	positive regulation of transcription from RNA polymerase II promoter in response to endoplasmic reticulum stress	3	13	0.0903421	8.9462e-05	0.000296155	["Atf4","Cebpb","Trp53"]
GO:0034166	8	toll-like receptor 10 signaling pathway	5	65	0.451711	8.9708e-05	0.000296155	["Fos","Jun","Nfkb1","Nfkb2","Rela"]
GO:0043620	5	regulation of DNA-templated transcription in response to stress	5	65	0.451711	8.9708e-05	0.000296155	["Atf4","Cebpb","Jun","Klf2","Trp53"]
GO:0071347	7	cellular response to interleukin-1	5	65	0.451711	8.9708e-05	0.000296155	["Irf1","Klf2","Nfkb1","Rela","Sox9"]
GO:0071241	5	cellular response to inorganic substance	8	203	1.41073	9.00817e-05	0.000296897	["Cebpa","Fos","Fosb","Foxo1","Jun","Junb","Jund","Nfatc4"]
GO:0006979	4	response to oxidative stress	11	390	2.71026	9.2831e-05	0.000305454	["Fos","Foxo1","Foxo3","Hnf1a","Jun","Klf2","Nfe2l1","Nfkb1","Rela","Stat6","Trp53"]
GO:0045927	5	positive regulation of growth	9	262	1.82074	9.39848e-05	0.000308741	["Arx","Gata6","Hlx","Hmga2","Lef1","Stat5a","Stat5b","Tbx2","Tbx5"]
GO:0034146	8	toll-like receptor 5 signaling pathway	5	66	0.45866	9.65211e-05	0.000316551	["Fos","Jun","Nfkb1","Nfkb2","Rela"]
GO:0021983	5	pituitary gland development	4	35	0.243229	9.93448e-05	0.000324212	["Hmga2","Lhx3","Pax6","Tcf7l2"]
GO:0050869	8	negative regulation of B cell activation	4	35	0.243229	9.93448e-05	0.000324212	["Bcl6","Foxj1","Foxp3","Prdm1"]
GO:0090311	8	regulation of protein deacetylation	4	35	0.243229	9.93448e-05	0.000324212	["Bcl6","Foxp3","Jdp2","Trp53"]
GO:0071375	6	cellular response to peptide hormone stimulus	8	206	1.43158	9.97478e-05	0.000324995	["Ctnnb1","Foxj1","Foxo1","Irf1","Nfkb1","Pax6","Rela","Rxra"]
GO:0045669	7	positive regulation of osteoblast differentiation	5	67	0.465609	0.000103725	0.000337402	["Cebpa","Cebpb","Ctnnb1","Jund","Sox11"]
GO:0033500	6	carbohydrate homeostasis	8	208	1.44547	0.000106657	0.000345812	["Cebpa","Foxa3","Foxo1","Foxo3","Hnf1a","Pax6","Stat3","Tcf7l2"]
GO:0042593	7	glucose homeostasis	8	208	1.44547	0.000106657	0.000345812	["Cebpa","Foxa3","Foxo1","Foxo3","Hnf1a","Pax6","Stat3","Tcf7l2"]
GO:0032844	4	regulation of homeostatic process	11	397	2.75891	0.000108587	0.000351497	["Ctnnb1","Foxa2","Foxo1","Foxo3","Gfi1b","Mafb","Nr1h2","Nr1h3","Stat5a","Stat5b","Tcf7l2"]
GO:0048701	7	embryonic cranial skeleton morphogenesis	4	36	0.250178	0.000111161	0.000356914	["Dlx2","Irx5","Six1","Tbx15"]
GO:0048736	4	appendage development	4	36	0.250178	0.000111161	0.000356914	["Ctnnb1","Nr2f2","Rara","Rarg"]
GO:0055025	8	positive regulation of cardiac muscle tissue development	4	36	0.250178	0.000111161	0.000356914	["Foxp1","Gata6","Tbx2","Tbx5"]
GO:0060173	5	limb development	4	36	0.250178	0.000111161	0.000356914	["Ctnnb1","Nr2f2","Rara","Rarg"]
GO:0032945	8	negative regulation of mononuclear cell proliferation	5	68	0.472559	0.000111334	0.000356914	["Cebpb","Foxj1","Foxp3","Prdm1","Sox11"]
GO:0050672	8	negative regulation of lymphocyte proliferation	5	68	0.472559	0.000111334	0.000356914	["Cebpb","Foxj1","Foxp3","Prdm1","Sox11"]
GO:0090090	8	negative regulation of canonical Wnt signaling pathway	7	156	1.08411	0.000112072	0.000358703	["Foxo1","Foxo3","Lef1","Sox10","Sox17","Sox9","Tcf7l2"]
GO:0010867	8	positive regulation of triglyceride biosynthetic process	3	14	0.0972915	0.00011328	0.000359112	["Nr1h2","Nr1h3","Tcf7l2"]
GO:0032674	6	regulation of interleukin-5 production	3	14	0.0972915	0.00011328	0.000359112	["Foxp3","Lef1","Rara"]
GO:0032823	8	regulation of natural killer cell differentiation	3	14	0.0972915	0.00011328	0.000359112	["Irf1","Stat5a","Stat5b"]
GO:0035112	4	genitalia morphogenesis	3	14	0.0972915	0.00011328	0.000359112	["Ctnnb1","Tcf7","Tcf7l2"]
GO:0045655	8	regulation of monocyte differentiation	3	14	0.0972915	0.00011328	0.000359112	["Foxp1","Irf7","Jun"]
GO:0048715	10	negative regulation of oligodendrocyte differentiation	3	14	0.0972915	0.00011328	0.000359112	["Ctnnb1","Dlx1","Dlx2"]
GO:0032526	5	response to retinoic acid	7	157	1.09105	0.000116627	0.000369134	["Irf1","Pou5f1","Rara","Rarg","Rxra","Rxrb","Sox9"]
GO:0030278	5	regulation of ossification	8	212	1.47327	0.000121667	0.000384476	["Cebpa","Cebpb","Ctnnb1","Egr2","Jund","Pbx1","Sox11","Sox9"]
GO:0032989	4	cellular component morphogenesis	13	548	3.80827	0.000122956	0.000387933	["Bcl6","Ctnnb1","Foxg1","Foxj1","Hmga2","Klf2","Lef1","Mnx1","Nr2e1","Pax6","Sox17","Sox6","Sox9"]
GO:0001755	6	neural crest cell migration	4	37	0.257128	0.000123964	0.000390496	["Lef1","Pax6","Sox10","Sox8"]
GO:0060415	5	muscle tissue morphogenesis	5	70	0.486458	0.000127832	0.000402046	["Ctnnb1","Foxc1","Pax7","Rxra","Shox2"]
GO:0032269	7	negative regulation of cellular protein metabolic process	18	963	6.69227	0.000131904	0.000414199	["Cebpa","Ctnnb1","Foxo1","Foxp3","Gfi1b","Irf1","Jun","Lef1","Mecom","Nfkb1","Nr1h2","Nr1h3","Nr2f2","Nr4a1","Pax6","Rara","Trp53","Trp73"]
GO:0007519	7	skeletal muscle tissue development	5	71	0.493407	0.000136752	0.000428747	["Foxp1","Hlx","Nr2f2","Pax7","Six1"]
GO:0045598	6	regulation of fat cell differentiation	6	113	0.785282	0.000140113	0.000434921	["Cebpa","Cebpb","Foxo1","Jdp2","Mecom","Tcf7l2"]
GO:0003148	5	outflow tract septum morphogenesis	3	15	0.104241	0.000140879	0.000434921	["Gata6","Rara","Tbx2"]
GO:0021527	7	spinal cord association neuron differentiation	3	15	0.104241	0.000140879	0.000434921	["Lhx3","Lhx5","Pax7"]
GO:0032727	8	positive regulation of interferon-alpha production	3	15	0.104241	0.000140879	0.000434921	["Irf3","Irf5","Irf7"]
GO:0040034	5	regulation of development, heterochronic	3	15	0.104241	0.000140879	0.000434921	["Nr2e1","Pax6","Sox5"]
GO:0045086	8	positive regulation of interleukin-2 biosynthetic process	3	15	0.104241	0.000140879	0.000434921	["Irf4","Stat5a","Stat5b"]
GO:0010908	7	regulation of heparan sulfate proteoglycan biosynthetic process	2	3	0.0208482	0.000143301	0.000434921	["Ctnnb1","Tcf7l2"]
GO:0010909	8	positive regulation of heparan sulfate proteoglycan biosynthetic process	2	3	0.0208482	0.000143301	0.000434921	["Ctnnb1","Tcf7l2"]
GO:0021882	10	regulation of transcription from RNA polymerase II promoter involved in forebrain neuron fate commitment	2	3	0.0208482	0.000143301	0.000434921	["Dlx1","Dlx2"]
GO:0034124	6	regulation of MyD88-dependent toll-like receptor signaling pathway	2	3	0.0208482	0.000143301	0.000434921	["Irf1","Irf7"]
GO:0035284	7	brain segmentation	2	3	0.0208482	0.000143301	0.000434921	["Egr2","Mafb"]
GO:0035986	7	senescence-associated heterochromatin focus assembly	2	3	0.0208482	0.000143301	0.000434921	["Hmga1","Hmga2"]
GO:0038161	7	prolactin signaling pathway	2	3	0.0208482	0.000143301	0.000434921	["Stat5a","Stat5b"]
GO:0046544	5	development of secondary male sexual characteristics	2	3	0.0208482	0.000143301	0.000434921	["Stat5a","Stat5b"]
GO:0048294	7	negative regulation of isotype switching to IgE isotypes	2	3	0.0208482	0.000143301	0.000434921	["Bcl6","Foxp3"]
GO:0060221	10	retinal rod cell differentiation	2	3	0.0208482	0.000143301	0.000434921	["Sox8","Sox9"]
GO:0070384	5	Harderian gland development	2	3	0.0208482	0.000143301	0.000434921	["Rarg","Sox9"]
GO:0072034	7	renal vesicle induction	2	3	0.0208482	0.000143301	0.000434921	["Sox8","Sox9"]
GO:0072047	6	proximal/distal pattern formation involved in nephron development	2	3	0.0208482	0.000143301	0.000434921	["Irx2","Irx3"]
GO:0072197	5	ureter morphogenesis	2	3	0.0208482	0.000143301	0.000434921	["Sox8","Sox9"]
GO:1902730	9	positive regulation of proteoglycan biosynthetic process	2	3	0.0208482	0.000143301	0.000434921	["Ctnnb1","Tcf7l2"]
GO:0070664	7	negative regulation of leukocyte proliferation	5	72	0.500356	0.00014614	0.000442862	["Cebpb","Foxj1","Foxp3","Prdm1","Sox11"]
GO:0050679	7	positive regulation of epithelial cell proliferation	7	163	1.13275	0.000147223	0.000445465	["Ctnnb1","Foxp1","Jun","Nr4a1","Sox11","Sox9","Tcf7l2"]
GO:0007165	5	signal transduction	60	5637	39.1737	0.000152651	0.000460715	["Atf4","Bcl6","Cebpa","Cebpb","Ctnnb1","Fos","Foxa2","Foxc1","Foxo1","Foxo3","Foxo4","Foxp3","Hmga2","Hnf1a","Hnf1b","Hoxd3","Irf1","Irf2","Irf3","Irf4","Irf5","Irf6","Irf7","Irf8","Irf9","Jun","Junb","Lef1","Nfatc2","Nfatc4","Nfkb1","Nfkb2","Nr1h2","Nr1h3","Nr1i2","Nr1i3","Nr2e1","Nr2f2","Nr4a1","Pax6","Pou5f1","Rara","Rarg","Rela","Relb","Rxra","Rxrb","Sox11","Sox17","Sox8","Sox9","Stat3","Sta…
GO:0044773	7	mitotic DNA damage checkpoint	4	39	0.271026	0.000152725	0.000460715	["Foxo4","Hmga2","Trp53","Trp73"]
GO:0007569	4	cell aging	5	73	0.507306	0.000156014	0.000468511	["Hmga1","Hmga2","Tbx2","Tbx3","Trp53"]
GO:0038123	8	toll-like receptor TLR1:TLR2 signaling pathway	5	73	0.507306	0.000156014	0.000468511	["Fos","Jun","Nfkb1","Nfkb2","Rela"]
GO:0038124	8	toll-like receptor TLR6:TLR2 signaling pathway	5	73	0.507306	0.000156014	0.000468511	["Fos","Jun","Nfkb1","Nfkb2","Rela"]
GO:0007219	7	Notch signaling pathway	7	165	1.14665	0.000158757	0.000476033	["Cebpa","Foxa2","Foxc1","Hnf1b","Hoxd3","Sox9","Tbx2"]
GO:0098609	4	cell-cell adhesion	14	643	4.46846	0.000164776	0.00049334	["Cebpb","Ctnnb1","Foxp1","Foxp3","Irf1","Irf4","Lef1","Mafb","Relb","Sox9","Stat5a","Stat5b","Tcf7","Trp53"]
GO:0071417	5	cellular response to organonitrogen compound	12	490	3.4052	0.000168128	0.000502619	["Cebpb","Ctnnb1","Egr2","Foxj1","Foxo1","Irf1","Klf2","Nfkb1","Pax6","Rela","Rxra","Sox9"]
GO:0002066	6	columnar/cuboidal epithelial cell development	4	40	0.277976	0.000168781	0.000503063	["Pax6","Prdm1","Rara","Rarg"]
GO:0048806	4	genitalia development	4	40	0.277976	0.000168781	0.000503063	["Ctnnb1","Hnf1b","Hoxd13","Tbx3"]
GO:0034599	5	cellular response to oxidative stress	7	167	1.16055	0.000171014	0.000508957	["Fos","Foxo1","Foxo3","Klf2","Nfe2l1","Rela","Stat6"]
GO:0002089	4	lens morphogenesis in camera-type eye	3	16	0.11119	0.000172507	0.000511111	["Ctnnb1","Meis1","Sox11"]
GO:0048708	7	astrocyte differentiation	3	16	0.11119	0.000172507	0.000511111	["Pax6","Sox6","Stat3"]
GO:0072132	5	mesenchyme morphogenesis	3	16	0.11119	0.000172507	0.000511111	["Ctnnb1","Sox9","Tbx2"]
GO:0034134	8	toll-like receptor 2 signaling pathway	5	75	0.521205	0.000177284	0.000524486	["Fos","Jun","Nfkb1","Nfkb2","Rela"]
GO:0001654	5	eye development	6	119	0.826978	0.000185981	0.000548708	["Foxc1","Nr2e1","Pax6","Rara","Rarg","Rxra"]
GO:0031016	4	pancreas development	4	41	0.284925	0.000186021	0.000548708	["Ctnnb1","Gata6","Mnx1","Tcf7l2"]
GO:0002706	7	regulation of lymphocyte mediated immunity	6	120	0.833927	0.000194659	0.000572493	["Bcl6","Foxj1","Foxp3","Stat5a","Stat5b","Stat6"]
GO:0002822	7	regulation of adaptive immune response based on somatic recombination of immune receptors built from immunoglobulin superfamily domains	6	120	0.833927	0.000194659	0.000572493	["Bcl6","Foxj1","Foxp3","Hlx","Irf1","Stat6"]
GO:0002460	5	adaptive immune response based on somatic recombination of immune receptors built from immunoglobulin superfamily domains	5	77	0.535103	0.000200698	0.000589385	["Bcl6","Foxp3","Irf7","Nfkb2","Relb"]
GO:0043523	7	regulation of neuron apoptotic process	8	229	1.59141	0.000206308	0.000604967	["Atf4","Cebpb","Dlx1","Foxo3","Jun","Six1","Trp53","Trp73"]
GO:0001706	5	endoderm formation	3	17	0.11814	0.000208406	0.000605774	["Ctnnb1","Hnf1b","Sox17"]
GO:0002294	9	CD4-positive, alpha-beta T cell differentiation involved in immune response	3	17	0.11814	0.000208406	0.000605774	["Foxp1","Lef1","Relb"]
GO:0021895	8	cerebral cortex neuron differentiation	3	17	0.11814	0.000208406	0.000605774	["Dlx1","Dlx2","Nr2e1"]
GO:0042093	10	T-helper cell differentiation	3	17	0.11814	0.000208406	0.000605774	["Foxp1","Lef1","Relb"]
GO:0045579	9	positive regulation of B cell differentiation	3	17	0.11814	0.000208406	0.000605774	["Prdm1","Stat5a","Stat5b"]
GO:0060216	6	definitive hemopoiesis	3	17	0.11814	0.000208406	0.000605774	["Hoxa9","Hoxb3","Meis1"]
GO:0035556	6	intracellular signal transduction	26	1768	12.2865	0.000212372	0.000616405	["Atf4","Bcl6","Cebpb","Ctnnb1","Fos","Foxo1","Foxo3","Foxo4","Irf1","Irf3","Irf7","Jun","Nfatc2","Nfatc4","Nfkb1","Nfkb2","Nr4a1","Rela","Relb","Sox11","Sox9","Stat3","Stat5a","Stat5b","Trp53","Trp73"]
GO:0051412	6	response to corticosterone	4	43	0.298824	0.000224258	0.000649957	["Fos","Fosb","Fosl2","Junb"]
GO:0007420	4	brain development	9	295	2.05007	0.000228807	0.000662178	["Dlx2","Egr2","Foxc1","Foxg1","Foxj1","Nr2e1","Pax6","Pou3f3","Pou6f1"]
GO:0022404	4	molting cycle process	5	80	0.555952	0.000240151	0.000692997	["Alx4","Ctnnb1","Rela","Sox21","Sox9"]
GO:0022405	5	hair cycle process	5	80	0.555952	0.000240151	0.000692997	["Alx4","Ctnnb1","Rela","Sox21","Sox9"]
GO:0090184	6	positive regulation of kidney development	4	44	0.305773	0.000245358	0.000706999	["Foxd1","Six1","Sox8","Sox9"]
GO:0007162	6	negative regulation of cell adhesion	8	235	1.63311	0.000245804	0.000707263	["Bcl6","Cebpb","Foxj1","Foxp3","Hlx","Irf1","Lef1","Zfp35"]
GO:0032647	7	regulation of interferon-alpha production	3	18	0.125089	0.000248814	0.000712837	["Irf3","Irf5","Irf7"]
GO:0060261	8	positive regulation of transcription initiation from RNA polymerase II promoter	3	18	0.125089	0.000248814	0.000712837	["Hnf1a","Hnf1b","Irf8"]
GO:0060351	4	cartilage development involved in endochondral bone morphogenesis	3	18	0.125089	0.000248814	0.000712837	["Rara","Rarg","Shox2"]
GO:0001764	5	neuron migration	6	126	0.875624	0.000253665	0.000724654	["Arx","Ctnnb1","Foxg1","Mnx1","Nr2f2","Pax6"]
GO:0051100	5	negative regulation of binding	6	126	0.875624	0.000253665	0.000724654	["Hmga2","Jun","Lef1","Nfatc4","Sox11","Zfp90"]
GO:0034121	5	regulation of toll-like receptor signaling pathway	4	45	0.312723	0.000267847	0.000760809	["Irf1","Irf4","Irf7","Nr1h3"]
GO:0044774	7	mitotic DNA integrity checkpoint	4	45	0.312723	0.000267847	0.000760809	["Foxo4","Hmga2","Trp53","Trp73"]
GO:0048663	6	neuron fate commitment	4	45	0.312723	0.000267847	0.000760809	["Dlx1","Dlx2","Pax6","Pax7"]
GO:0061515	5	myeloid cell development	4	45	0.312723	0.000267847	0.000760809	["Bcl6","Foxp1","Meis1","Sox6"]
GO:0009267	5	cellular response to starvation	6	128	0.889522	0.000276181	0.000783364	["Atf4","Foxa3","Foxo1","Jun","Tcf7l2","Trp53"]
GO:0002755	8	MyD88-dependent toll-like receptor signaling pathway	5	83	0.5768	0.00028524	0.000786824	["Fos","Jun","Nfkb1","Nfkb2","Rela"]
GO:0003415	5	chondrocyte hypertrophy	2	4	0.0277976	0.000285293	0.000786824	["Rarg","Sox9"]
GO:0006549	6	isoleucine metabolic process	2	4	0.0277976	0.000285293	0.000786824	["Stat5a","Stat5b"]
GO:0009786	6	regulation of asymmetric cell division	2	4	0.0277976	0.000285293	0.000786824	["Pax6","Pou5f1"]
GO:0021615	5	glossopharyngeal nerve morphogenesis	2	4	0.0277976	0.000285293	0.000786824	["Hoxb3","Hoxd3"]
GO:0021892	8	cerebral cortex GABAergic interneuron differentiation	2	4	0.0277976	0.000285293	0.000786824	["Dlx1","Dlx2"]
GO:0030538	5	embryonic genitalia morphogenesis	2	4	0.0277976	0.000285293	0.000786824	["Tcf7","Tcf7l2"]
GO:0045829	6	negative regulation of isotype switching	2	4	0.0277976	0.000285293	0.000786824	["Bcl6","Foxp3"]
GO:0046449	5	creatinine metabolic process	2	4	0.0277976	0.000285293	0.000786824	["Stat5a","Stat5b"]
GO:0046543	5	development of secondary female sexual characteristics	2	4	0.0277976	0.000285293	0.000786824	["Stat5a","Stat5b"]
GO:0048550	7	negative regulation of pinocytosis	2	4	0.0277976	0.000285293	0.000786824	["Nr1h2","Nr1h3"]
GO:0060018	7	astrocyte fate commitment	2	4	0.0277976	0.000285293	0.000786824	["Sox8","Sox9"]
GO:0060596	5	mammary placode formation	2	4	0.0277976	0.000285293	0.000786824	["Tbx2","Tbx3"]
GO:0060913	6	cardiac cell fate determination	2	4	0.0277976	0.000285293	0.000786824	["Pou5f1","Sox17"]
GO:0072086	7	specification of loop of Henle identity	2	4	0.0277976	0.000285293	0.000786824	["Irx2","Irx3"]
GO:0072095	6	regulation of branch elongation involved in ureteric bud branching	2	4	0.0277976	0.000285293	0.000786824	["Hnf1b","Six1"]
GO:0072193	8	ureter smooth muscle cell differentiation	2	4	0.0277976	0.000285293	0.000786824	["Six1","Sox9"]
GO:0072268	6	pattern specification involved in metanephros development	2	4	0.0277976	0.000285293	0.000786824	["Foxd1","Irx2"]
GO:0072289	7	metanephric nephron tubule formation	2	4	0.0277976	0.000285293	0.000786824	["Sox8","Sox9"]
GO:2000774	6	positive regulation of cellular senescence	2	4	0.0277976	0.000285293	0.000786824	["Hmga1","Hmga2"]
GO:0045926	5	negative regulation of growth	8	241	1.6748	0.000291294	0.000798585	["Bcl6","Foxk1","Irf8","Sox17","Tbx5","Tcf7l2","Trp53","Trp73"]
GO:0002889	9	regulation of immunoglobulin mediated immune response	4	46	0.319672	0.00029178	0.000798585	["Bcl6","Foxj1","Foxp3","Stat6"]
GO:0060135	4	maternal process involved in female pregnancy	4	46	0.319672	0.00029178	0.000798585	["Nr2f2","Prdm1","Rxra","Rxrb"]
GO:0002068	7	glandular epithelial cell development	3	19	0.132038	0.000293963	0.000798585	["Pax6","Rara","Rarg"]
GO:0002293	8	alpha-beta T cell differentiation involved in immune response	3	19	0.132038	0.000293963	0.000798585	["Foxp1","Lef1","Relb"]
GO:0010866	7	regulation of triglyceride biosynthetic process	3	19	0.132038	0.000293963	0.000798585	["Nr1h2","Nr1h3","Tcf7l2"]
GO:0021846	5	cell proliferation in forebrain	3	19	0.132038	0.000293963	0.000798585	["Arx","Hmga2","Lhx5"]
GO:0030852	8	regulation of granulocyte differentiation	3	19	0.132038	0.000293963	0.000798585	["Gfi1b","Lef1","Rara"]
GO:0033151	5	V(D)J recombination	3	19	0.132038	0.000293963	0.000798585	["Foxp1","Lef1","Tcf7"]
GO:0042089	6	cytokine biosynthetic process	3	19	0.132038	0.000293963	0.000798585	["Irf3","Irf7","Irf9"]
GO:0090312	9	positive regulation of protein deacetylation	3	19	0.132038	0.000293963	0.000798585	["Bcl6","Jdp2","Trp53"]
GO:0000904	6	cell morphogenesis involved in differentiation	7	184	1.27869	0.000309281	0.000837915	["Ctnnb1","Foxg1","Hmga2","Lef1","Mnx1","Sox17","Sox9"]
GO:0050870	8	positive regulation of T cell activation	7	184	1.27869	0.000309281	0.000837915	["Foxp3","Hlx","Irf1","Myb","Rara","Stat5a","Stat5b"]
GO:0002712	8	regulation of B cell mediated immunity	4	47	0.326622	0.000317209	0.000858228	["Bcl6","Foxj1","Foxp3","Stat6"]
GO:0071300	6	cellular response to retinoic acid	5	86	0.597648	0.000336477	0.000909125	["Irf1","Rara","Rarg","Rxrb","Sox9"]
GO:0002757	4	immune response-activating signal transduction	10	380	2.64077	0.000337313	0.000910153	["Fos","Foxp3","Irf3","Irf7","Jun","Nfatc2","Nfkb1","Nfkb2","Rela","Relb"]
GO:0001829	6	trophectodermal cell differentiation	3	20	0.138988	0.000344079	0.000918753	["Cdx2","Junb","Pou5f1"]
GO:0002063	5	chondrocyte development	3	20	0.138988	0.000344079	0.000918753	["Rarg","Shox2","Sox9"]
GO:0002287	7	alpha-beta T cell activation involved in immune response	3	20	0.138988	0.000344079	0.000918753	["Foxp1","Lef1","Relb"]
GO:0021904	7	dorsal/ventral neural tube patterning	3	20	0.138988	0.000344079	0.000918753	["Foxa2","Mnx1","Pax7"]
GO:0030878	5	thyroid gland development	3	20	0.138988	0.000344079	0.000918753	["Hoxb3","Hoxd3","Six1"]
GO:0032331	7	negative regulation of chondrocyte differentiation	3	20	0.138988	0.000344079	0.000918753	["Ctnnb1","Rarg","Sox9"]
GO:0071359	6	cellular response to dsRNA	3	20	0.138988	0.000344079	0.000918753	["Irf1","Irf3","Nfkb1"]
GO:0002062	6	chondrocyte differentiation	4	48	0.333571	0.000344187	0.000918753	["Arid5a","Hmga2","Shox2","Sox9"]
GO:0009991	4	response to extracellular stimulus	12	531	3.69013	0.000349448	0.00093155	["Atf4","Cebpa","Fos","Foxa3","Foxo1","Jun","Rara","Rela","Rxra","Stat5a","Tcf7l2","Trp53"]
GO:0030178	7	negative regulation of Wnt signaling pathway	7	188	1.30649	0.000352214	0.000936419	["Foxo1","Foxo3","Lef1","Sox10","Sox17","Sox9","Tcf7l2"]
GO:0034112	8	positive regulation of homotypic cell-cell adhesion	7	188	1.30649	0.000352214	0.000936419	["Foxp3","Hlx","Irf1","Myb","Rara","Stat5a","Stat5b"]
GO:1903039	8	positive regulation of leukocyte cell-cell adhesion	7	189	1.31344	0.00036366	0.000965563	["Foxp3","Hlx","Irf1","Myb","Rara","Stat5a","Stat5b"]
GO:0010038	5	response to metal ion	10	387	2.68942	0.000389357	0.00103242	["Cebpa","Ctnnb1","Fos","Fosb","Jun","Junb","Jund","Lef1","Nfatc4","Nfkb1"]
GO:0014032	7	neural crest cell development	3	21	0.145937	0.000399384	0.00105062	["Foxc1","Sox11","Sox9"]
GO:0043921	7	modulation by host of viral transcription	3	21	0.145937	0.000399384	0.00105062	["Hmga2","Jun","Lef1"]
GO:0052472	6	modulation by host of symbiont transcription	3	21	0.145937	0.000399384	0.00105062	["Hmga2","Jun","Lef1"]
GO:0060045	6	positive regulation of cardiac muscle cell proliferation	3	21	0.145937	0.000399384	0.00105062	["Gata6","Tbx2","Tbx5"]
GO:0060397	8	JAK-STAT cascade involved in growth hormone signaling pathway	3	21	0.145937	0.000399384	0.00105062	["Stat3","Stat5a","Stat5b"]
GO:0071354	7	cellular response to interleukin-6	3	21	0.145937	0.000399384	0.00105062	["Myb","Nfkb1","Rela"]
GO:0001942	4	hair follicle development	4	50	0.34747	0.000403007	0.00105876	["Alx4","Rela","Sox21","Sox9"]
GO:0031099	4	regeneration	7	193	1.34123	0.000412463	0.00108217	["Cebpa","Cebpb","Jun","Lef1","Pax7","Pou2f1","Rxra"]
GO:0043433	5	negative regulation of sequence-specific DNA binding transcription factor activity	6	139	0.965966	0.000429571	0.00112558	["Cebpg","Foxa2","Foxj1","Foxp3","Pbx1","Tcf7l2"]
GO:0060041	4	retina development in camera-type eye	5	91	0.632395	0.000436985	0.0011435	["Nr2e1","Pax6","Rarg","Sox8","Sox9"]
GO:0002292	7	T cell differentiation involved in immune response	3	22	0.152887	0.000460094	0.00119166	["Foxp1","Lef1","Relb"]
GO:0023019	6	signal transduction involved in regulation of gene expression	3	22	0.152887	0.000460094	0.00119166	["Foxa2","Pax6","Sox17"]
GO:0030539	5	male genitalia development	3	22	0.152887	0.000460094	0.00119166	["Ctnnb1","Hoxd13","Tbx3"]
GO:0048645	4	organ formation	3	22	0.152887	0.000460094	0.00119166	["Ctnnb1","Gata6","Sox17"]
GO:0052312	5	modulation of transcription in other organism involved in symbiotic interaction	3	22	0.152887	0.000460094	0.00119166	["Hmga2","Jun","Lef1"]
GO:0090208	7	positive regulation of triglyceride metabolic process	3	22	0.152887	0.000460094	0.00119166	["Nr1h2","Nr1h3","Tcf7l2"]
GO:0001890	4	placenta development	4	52	0.361368	0.000468675	0.00119166	["Cdx2","Hnf1a","Lhx3","Rxra"]
GO:0006953	7	acute-phase response	4	52	0.361368	0.000468675	0.00119166	["Cebpa","Cebpb","Stat3","Stat5b"]
GO:0000255	5	allantoin metabolic process	2	5	0.034747	0.000473315	0.00119166	["Stat5a","Stat5b"]
GO:0001714	6	endodermal cell fate specification	2	5	0.034747	0.000473315	0.00119166	["Hnf1b","Pou5f1"]
GO:0002568	4	somatic diversification of T cell receptor genes	2	5	0.034747	0.000473315	0.00119166	["Lef1","Tcf7"]
GO:0002681	5	somatic recombination of T cell receptor gene segments	2	5	0.034747	0.000473315	0.00119166	["Lef1","Tcf7"]
GO:0003310	10	pancreatic A cell differentiation	2	5	0.034747	0.000473315	0.00119166	["Gata6","Pax6"]
GO:0009794	7	regulation of mitotic cell cycle, embryonic	2	5	0.034747	0.000473315	0.00119166	["Ctnnb1","E4f1"]
GO:0021544	4	subpallium development	2	5	0.034747	0.000473315	0.00119166	["Dlx1","Dlx2"]
GO:0021778	7	oligodendrocyte cell fate specification	2	5	0.034747	0.000473315	0.00119166	["Pax6","Sox6"]
GO:0021780	6	glial cell fate specification	2	5	0.034747	0.000473315	0.00119166	["Pax6","Sox6"]
GO:0033153	6	T cell receptor V(D)J recombination	2	5	0.034747	0.000473315	0.00119166	["Lef1","Tcf7"]
GO:0035564	5	regulation of kidney size	2	5	0.034747	0.000473315	0.00119166	["Hnf1a","Hnf1b"]
GO:0045063	11	T-helper 1 cell differentiation	2	5	0.034747	0.000473315	0.00119166	["Lef1","Relb"]
GO:0046533	6	negative regulation of photoreceptor cell differentiation	2	5	0.034747	0.000473315	0.00119166	["Sox8","Sox9"]
GO:0051891	6	positive regulation of cardioblast differentiation	2	5	0.034747	0.000473315	0.00119166	["Gata6","Tbx5"]
GO:0060164	7	regulation of timing of neuron differentiation	2	5	0.034747	0.000473315	0.00119166	["Nr2e1","Sox5"]
GO:0060331	7	negative regulation of response to interferon-gamma	2	5	0.034747	0.000473315	0.00119166	["Nr1h2","Nr1h3"]
GO:0060336	8	negative regulation of interferon-gamma-mediated signaling pathway	2	5	0.034747	0.000473315	0.00119166	["Nr1h2","Nr1h3"]
GO:0072081	6	specification of nephron tubule identity	2	5	0.034747	0.000473315	0.00119166	["Irx2","Irx3"]
GO:0072338	4	cellular lactam metabolic process	2	5	0.034747	0.000473315	0.00119166	["Stat5a","Stat5b"]
GO:0072513	7	positive regulation of secondary heart field cardioblast proliferation	2	5	0.034747	0.000473315	0.00119166	["Six1","Tbx5"]
GO:1990314	7	cellular response to insulin-like growth factor stimulus	2	5	0.034747	0.000473315	0.00119166	["Ctnnb1","Foxj1"]
GO:2000630	8	positive regulation of miRNA metabolic process	2	5	0.034747	0.000473315	0.00119166	["Nfkb1","Rela"]
GO:0001667	5	ameboidal-type cell migration	6	142	0.986814	0.000481171	0.00120719	["Lef1","Nr4a1","Pax6","Sox10","Sox17","Sox8"]
GO:0030324	4	lung development	6	142	0.986814	0.000481171	0.00120719	["Cebpa","Ctnnb1","Foxa2","Foxp1","Lhx3","Tbx5"]
GO:0044419	3	interspecies interaction between organisms	14	715	4.96882	0.0004813	0.00120719	["Cebpa","E4f1","Gtf2b","Hmga1","Hmga2","Irf3","Irf7","Jun","Lef1","Rela","Rxra","Stat3","Tbp","Trp53"]
GO:0007166	6	cell surface receptor signaling pathway	44	3893	27.054	0.000498242	0.00124811	["Atf4","Cebpa","Ctnnb1","Fos","Foxa2","Foxc1","Foxo1","Foxo3","Foxo4","Foxp3","Hnf1b","Hoxd3","Irf1","Irf2","Irf3","Irf4","Irf5","Irf6","Irf7","Irf8","Irf9","Jun","Junb","Lef1","Nfatc2","Nfkb1","Nfkb2","Nr1h3","Nr4a1","Pax6","Pou5f1","Rarg","Rela","Relb","Sox17","Sox9","Stat3","Stat5a","Stat5b","Stat6","Tbx2","Tcf7","Tcf7l2","Trp53"]
GO:0010467	5	gene expression	15	804	5.58731	0.000500024	0.001251	["Gtf2b","Junb","Nr1h2","Nr1h3","Nr1i2","Nr1i3","Nr2e1","Nr4a1","Pou2f1","Rara","Rarg","Rxra","Rxrb","Tbp","Tbx5"]
GO:0032663	6	regulation of interleukin-2 production	4	53	0.368318	0.000504214	0.00125833	["Foxp3","Irf4","Stat5a","Stat5b"]
GO:0072164	5	mesonephric tubule development	4	53	0.368318	0.000504214	0.00125833	["Foxc1","Hnf1b","Rara","Six1"]
GO:0007167	7	enzyme linked receptor protein signaling pathway	16	894	6.21276	0.000509582	0.00127013	["Fos","Foxc1","Foxo1","Foxo3","Foxo4","Jun","Junb","Lef1","Nfkb1","Nr1h3","Nr4a1","Pou5f1","Rela","Sox9","Stat3","Trp53"]
GO:0031668	4	cellular response to extracellular stimulus	7	200	1.38988	0.000510373	0.00127052	["Atf4","Fos","Foxa3","Foxo1","Jun","Tcf7l2","Trp53"]
GO:0051607	4	defense response to virus	6	144	1.00071	0.000518168	0.00128831	["Irf1","Irf3","Irf5","Irf7","Irf9","Rela"]
GO:0071363	6	cellular response to growth factor stimulus	8	263	1.82769	0.000520694	0.00129298	["Ctnnb1","Gata6","Nr4a1","Pax6","Sox5","Sox6","Sox9","Stat5b"]
GO:0032816	8	positive regulation of natural killer cell activation	3	23	0.159836	0.000526419	0.00130233	["Irf1","Stat5a","Stat5b"]
GO:0060260	7	regulation of transcription initiation from RNA polymerase II promoter	3	23	0.159836	0.000526419	0.00130233	["Hnf1a","Hnf1b","Irf8"]
GO:0090190	6	positive regulation of branching involved in ureteric bud morphogenesis	3	23	0.159836	0.000526419	0.00130233	["Six1","Sox8","Sox9"]
GO:0048145	6	regulation of fibroblast proliferation	5	95	0.660192	0.000532477	0.00131406	["Ctnnb1","Fosb","Fosl2","Jun","Trp53"]
GO:0050673	4	epithelial cell proliferation	5	95	0.660192	0.000532477	0.00131406	["Cebpb","Hnf1b","Irf6","Sox9","Stat6"]
GO:0001837	7	epithelial to mesenchymal transition	4	54	0.375267	0.000541629	0.0013317	["Ctnnb1","Hmga2","Lef1","Sox9"]
GO:0031060	9	regulation of histone methylation	4	54	0.375267	0.000541629	0.0013317	["Ctnnb1","Gfi1b","Myb","Pax7"]
GO:0072163	7	mesonephric epithelium development	4	54	0.375267	0.000541629	0.0013317	["Foxc1","Hnf1b","Rara","Six1"]
GO:0051128	4	regulation of cellular component organization	30	2307	16.0323	0.000546061	0.00134094	["Arid5a","Bcl6","Ctnnb1","Foxa2","Foxk1","Foxp3","Gfi1b","Hmga1","Hnf1a","Hnf1b","Irf8","Jdp2","Jun","Lef1","Myb","Nfatc2","Nfatc4","Nr1h2","Nr1h3","Nr2e1","Pax6","Pax7","Pou5f1","Shox2","Six1","Sox17","Sox9","Tbx5","Trp53","Zfp382"]
GO:0045778	6	positive regulation of ossification	5	96	0.667142	0.000558622	0.0013701	["Cebpa","Cebpb","Ctnnb1","Jund","Sox11"]
GO:0001836	6	release of cytochrome c from mitochondria	3	24	0.166785	0.000598565	0.00146446	["Jun","Trp53","Trp73"]
GO:0031497	5	chromatin assembly	3	24	0.166785	0.000598565	0.00146446	["Hmga1","Hmga2","Trp53"]
GO:0002637	7	regulation of immunoglobulin production	4	56	0.389166	0.000622311	0.00151883	["Bcl6","Foxp1","Foxp3","Stat6"]
GO:0051385	7	response to mineralocorticoid	4	56	0.389166	0.000622311	0.00151883	["Fos","Fosb","Fosl2","Junb"]
GO:0051148	7	negative regulation of muscle cell differentiation	4	57	0.396115	0.000665689	0.00162272	["Foxo4","Sox8","Sox9","Tbx3"]
GO:0042107	5	cytokine metabolic process	3	25	0.173735	0.000676733	0.00163763	["Irf3","Irf7","Irf9"]
GO:0045191	6	regulation of isotype switching	3	25	0.173735	0.000676733	0.00163763	["Bcl6","Foxp3","Stat6"]
GO:0045662	8	negative regulation of myoblast differentiation	3	25	0.173735	0.000676733	0.00163763	["Sox8","Sox9","Tbx3"]
GO:0048546	4	digestive tract morphogenesis	3	25	0.173735	0.000676733	0.00163763	["Sox10","Sox17","Trp73"]
GO:0060441	6	epithelial tube branching involved in lung morphogenesis	3	25	0.173735	0.000676733	0.00163763	["Ctnnb1","Foxa2","Sox9"]
GO:2000178	7	negative regulation of neural precursor cell proliferation	3	25	0.173735	0.000676733	0.00163763	["Nr2e1","Pax6","Trp53"]
GO:0032355	6	response to estradiol	7	210	1.45937	0.000681478	0.00164711	["Ctnnb1","Fosl2","Foxj1","Nr2f2","Rara","Stat3","Stat5b"]
GO:0007346	6	regulation of mitotic cell cycle	11	493	3.42605	0.000685049	0.00165374	["Ctnnb1","E4f1","Foxc1","Foxg1","Foxo4","Hmga2","Pbx1","Stat5a","Stat5b","Trp53","Trp73"]
GO:0070555	6	response to interleukin-1	5	101	0.701889	0.000704078	0.00168165	["Irf1","Klf2","Nfkb1","Rela","Sox9"]
GO:0003170	4	heart valve development	2	6	0.0416964	0.000706731	0.00168165	["Shox2","Sox9"]
GO:0010887	6	negative regulation of cholesterol storage	2	6	0.0416964	0.000706731	0.00168165	["Nr1h2","Nr1h3"]
GO:0030910	5	olfactory placode formation	2	6	0.0416964	0.000706731	0.00168165	["Pou2f1","Six1"]
GO:0031052	5	chromosome breakage	2	6	0.0416964	0.000706731	0.00168165	["Hmga2","Trp53"]
GO:0032714	7	negative regulation of interleukin-5 production	2	6	0.0416964	0.000706731	0.00168165	["Foxp3","Lef1"]
GO:0039528	4	cytoplasmic pattern recognition receptor signaling pathway in response to virus	2	6	0.0416964	0.000706731	0.00168165	["Irf3","Irf7"]
GO:0044336	9	canonical Wnt signaling pathway involved in negative regulation of apoptotic process	2	6	0.0416964	0.000706731	0.00168165	["Ctnnb1","Tcf7"]
GO:0051176	7	positive regulation of sulfur metabolic process	2	6	0.0416964	0.000706731	0.00168165	["Ctnnb1","Tcf7l2"]
GO:0061046	6	regulation of branching involved in lung morphogenesis	2	6	0.0416964	0.000706731	0.00168165	["Ctnnb1","Sox9"]
GO:0061218	7	negative regulation of mesonephros development	2	6	0.0416964	0.000706731	0.00168165	["Hnf1b","Six1"]
GO:0072174	6	metanephric tubule formation	2	6	0.0416964	0.000706731	0.00168165	["Sox8","Sox9"]
GO:0042592	4	homeostatic process	20	1307	9.08286	0.000751082	0.00178505	["Cebpa","Ctnnb1","Foxa3","Foxc1","Foxo1","Foxo3","Foxp3","Hnf1a","Klf2","Mecom","Myb","Nr1h2","Nr1h3","Pax6","Sox9","Stat3","Stat5a","Stat5b","Tcf7l2","Trp53"]
GO:0002067	8	glandular epithelial cell differentiation	3	26	0.180684	0.000761118	0.00180032	["Gata6","Pax6","Rxra"]
GO:0010743	6	regulation of macrophage derived foam cell differentiation	3	26	0.180684	0.000761118	0.00180032	["Nfkb1","Nr1h2","Nr1h3"]
GO:0061213	7	positive regulation of mesonephros development	3	26	0.180684	0.000761118	0.00180032	["Six1","Sox8","Sox9"]
GO:0071353	7	cellular response to interleukin-4	3	26	0.180684	0.000761118	0.00180032	["Lef1","Nfil3","Tcf7"]
GO:2000106	8	regulation of leukocyte apoptotic process	5	103	0.715788	0.000769556	0.00181812	["Bcl6","Foxp1","Irf7","Stat5a","Trp53"]
GO:0034614	6	cellular response to reactive oxygen species	5	104	0.722737	0.000803949	0.00189713	["Fos","Foxo1","Klf2","Rela","Stat6"]
GO:0071396	6	cellular response to lipid	11	503	3.49555	0.000807193	0.00190145	["Irf1","Irf3","Irf8","Nfkb1","Nr1h3","Pax6","Rara","Rarg","Rela","Rxrb","Sox9"]
GO:0009880	5	embryonic pattern specification	4	60	0.416964	0.000808641	0.00190145	["Ctnnb1","Foxa2","Meox1","Tbx3"]
GO:0048641	7	regulation of skeletal muscle tissue development	4	60	0.416964	0.000808641	0.00190145	["Shox2","Six1","Sox17","Tcf7l2"]
GO:0031667	5	response to nutrient levels	11	505	3.50944	0.000833673	0.001958	["Atf4","Cebpa","Foxa3","Foxo1","Jun","Rara","Rela","Rxra","Stat5a","Tcf7l2","Trp53"]
GO:0001892	4	embryonic placenta development	3	27	0.187634	0.000851912	0.00198216	["Cebpa","Cebpb","Prdm1"]
GO:0002262	3	myeloid cell homeostasis	3	27	0.187634	0.000851912	0.00198216	["Foxp3","Klf2","Mecom"]
GO:0014031	6	mesenchymal cell development	3	27	0.187634	0.000851912	0.00198216	["Foxc1","Sox11","Sox9"]
GO:0045746	7	negative regulation of Notch signaling pathway	3	27	0.187634	0.000851912	0.00198216	["Bcl6","Dlx1","Dlx2"]
GO:0045992	6	negative regulation of embryonic development	3	27	0.187634	0.000851912	0.00198216	["Ctnnb1","Sox17","Tbx2"]
GO:0048048	6	embryonic eye morphogenesis	3	27	0.187634	0.000851912	0.00198216	["Pax6","Rarg","Tbx2"]
GO:0051569	10	regulation of histone H3-K4 methylation	3	27	0.187634	0.000851912	0.00198216	["Ctnnb1","Gfi1b","Myb"]
GO:0060740	4	prostate gland epithelium morphogenesis	3	27	0.187634	0.000851912	0.00198216	["Hoxd13","Rarg","Stat5a"]
GO:0014015	8	positive regulation of gliogenesis	4	61	0.423913	0.000860752	0.00200039	["Rela","Sox10","Sox8","Trp73"]
GO:0002253	3	activation of immune response	10	429	2.98129	0.000861959	0.00200087	["Fos","Foxp3","Irf3","Irf7","Jun","Nfatc2","Nfkb1","Nfkb2","Rela","Relb"]
GO:0031334	6	positive regulation of protein complex assembly	6	159	1.10495	0.00087122	0.00202001	["Ctnnb1","Hnf1a","Hnf1b","Irf8","Jun","Trp53"]
GO:0035264	3	multicellular organism growth	5	106	0.736636	0.00087616	0.00202911	["Klf2","Rara","Rarg","Tcf7l2","Trp53"]
GO:0008593	6	regulation of Notch signaling pathway	4	62	0.430862	0.000915185	0.00211703	["Bcl6","Dlx1","Dlx2","Stat3"]
GO:0042113	5	B cell activation	6	161	1.11885	0.000929613	0.00214791	["Bcl6","Cebpg","Foxp1","Lef1","Myb","Pou2f2"]
GO:0002823	8	negative regulation of adaptive immune response based on somatic recombination of immune receptors built from immunoglobulin superfamily domains	3	28	0.194583	0.000949299	0.00218833	["Bcl6","Foxj1","Foxp3"]
GO:0046621	6	negative regulation of organ growth	3	28	0.194583	0.000949299	0.00218833	["Tbx5","Tcf7l2","Trp73"]
GO:0090092	6	regulation of transmembrane receptor protein serine/threonine kinase signaling pathway	7	223	1.54971	0.000968703	0.00222161	["Foxd1","Gata6","Mecom","Pou5f1","Sox11","Tcf7l2","Trp53"]
GO:0003007	5	heart morphogenesis	4	63	0.437812	0.000971998	0.00222161	["Foxc1","Rxra","Tbx2","Tbx3"]
GO:0043525	8	positive regulation of neuron apoptotic process	4	63	0.437812	0.000971998	0.00222161	["Atf4","Foxo3","Jun","Trp53"]
GO:0061351	4	neural precursor cell proliferation	4	63	0.437812	0.000971998	0.00222161	["Arx","Hmga2","Lhx5","Pax6"]
GO:0001661	4	conditioned taste aversion	2	7	0.0486458	0.000984908	0.00222161	["Fos","Fosl2"]
GO:0001711	7	endodermal cell fate commitment	2	7	0.0486458	0.000984908	0.00222161	["Ctnnb1","Pou5f1"]
GO:0002295	9	T-helper cell lineage commitment	2	7	0.0486458	0.000984908	0.00222161	["Irf4","Stat6"]
GO:0003307	6	regulation of Wnt signaling pathway involved in heart development	2	7	0.0486458	0.000984908	0.00222161	["Pou5f1","Sox17"]
GO:0019530	5	taurine metabolic process	2	7	0.0486458	0.000984908	0.00222161	["Stat5a","Stat5b"]
GO:0021520	7	spinal cord motor neuron cell fate specification	2	7	0.0486458	0.000984908	0.00222161	["Lhx3","Mnx1"]
GO:0032713	7	negative regulation of interleukin-4 production	2	7	0.0486458	0.000984908	0.00222161	["Foxp3","Lef1"]
GO:0045136	4	development of secondary sexual characteristics	2	7	0.0486458	0.000984908	0.00222161	["Stat5a","Stat5b"]
GO:0045588	10	positive regulation of gamma-delta T cell differentiation	2	7	0.0486458	0.000984908	0.00222161	["Stat5a","Stat5b"]
GO:0051574	9	positive regulation of histone H3-K9 methylation	2	7	0.0486458	0.000984908	0.00222161	["Gfi1b","Myb"]
GO:0060219	9	camera-type eye photoreceptor cell differentiation	2	7	0.0486458	0.000984908	0.00222161	["Sox8","Sox9"]
GO:0060687	5	regulation of branching involved in prostate gland morphogenesis	2	7	0.0486458	0.000984908	0.00222161	["Hoxd13","Rxra"]
GO:0071599	5	otic vesicle development	2	7	0.0486458	0.000984908	0.00222161	["Six1","Sox9"]
GO:0097154	7	GABAergic neuron differentiation	2	7	0.0486458	0.000984908	0.00222161	["Dlx1","Dlx2"]
GO:1902338	6	negative regulation of apoptotic process involved in morphogenesis	2	7	0.0486458	0.000984908	0.00222161	["Foxc1","Hnf1b"]
GO:0050727	6	regulation of inflammatory response	8	291	2.02227	0.00100461	0.00226349	["Bcl6","Foxp1","Foxp3","Nfkb1","Nr1h3","Rela","Stat5a","Stat5b"]
GO:0022602	3	ovulation cycle process	5	110	0.764433	0.00103495	0.00232921	["Cebpb","Foxc1","Foxo3","Stat5a","Stat5b"]
GO:0055023	8	positive regulation of cardiac muscle tissue growth	3	29	0.201532	0.00105346	0.00236555	["Gata6","Tbx2","Tbx5"]
GO:0061458	5	reproductive system development	3	29	0.201532	0.00105346	0.00236555	["Ctnnb1","Hoxd13","Tbx3"]
GO:0010717	6	regulation of epithelial to mesenchymal transition	4	65	0.451711	0.00109299	0.00244878	["Ctnnb1","Foxa2","Lef1","Tbx5"]
GO:2000107	9	negative regulation of leukocyte apoptotic process	4	65	0.451711	0.00109299	0.00244878	["Bcl6","Foxp1","Irf7","Stat5a"]
GO:0030183	6	B cell differentiation	5	112	0.778332	0.0011219	0.0025104	["Bcl6","Cebpg","Foxp1","Myb","Pou2f2"]
GO:0002703	6	regulation of leukocyte mediated immunity	6	167	1.16055	0.00112301	0.0025104	["Bcl6","Foxj1","Foxp3","Stat5a","Stat5b","Stat6"]
GO:1901654	5	response to ketone	7	229	1.59141	0.00112989	0.00252295	["Fos","Fosb","Fosl2","Junb","Nr1h3","Pax6","Rela"]
GO:0045670	8	regulation of osteoclast differentiation	4	66	0.45866	0.00115727	0.00258121	["Cebpb","Ctnnb1","Fos","Mafb"]
GO:0045785	6	positive regulation of cell adhesion	9	370	2.57128	0.00116183	0.00258306	["Foxa2","Foxp3","Hlx","Irf1","Lef1","Myb","Rara","Stat5a","Stat5b"]
GO:0001824	4	blastocyst development	3	30	0.208482	0.00116458	0.00258306	["Cdx2","Hnf1a","Pou5f1"]
GO:0007422	5	peripheral nervous system development	3	30	0.208482	0.00116458	0.00258306	["Egr2","Sox10","Sox8"]
GO:0032369	6	negative regulation of lipid transport	3	30	0.208482	0.00116458	0.00258306	["Nfkb1","Nr1h2","Nr1h3"]
GO:0045577	8	regulation of B cell differentiation	3	30	0.208482	0.00116458	0.00258306	["Prdm1","Stat5a","Stat5b"]
GO:0002223	7	stimulatory C-type lectin receptor signaling pathway	5	113	0.785282	0.00116735	0.00258634	["Nfatc2","Nfkb1","Nfkb2","Rela","Relb"]
GO:0031669	5	cellular response to nutrient levels	6	170	1.1814	0.00123058	0.00272339	["Atf4","Foxa3","Foxo1","Jun","Tcf7l2","Trp53"]
GO:0010564	6	regulation of cell cycle process	11	532	3.69708	0.00126773	0.00280249	["Ctnnb1","E4f1","Foxo4","Gata6","Hmga2","Lef1","Pbx1","Sox11","Sox9","Trp53","Trp73"]
GO:0002820	7	negative regulation of adaptive immune response	3	31	0.215431	0.00128282	0.00282958	["Bcl6","Foxj1","Foxp3"]
GO:0032814	7	regulation of natural killer cell activation	3	31	0.215431	0.00128282	0.00282958	["Irf1","Stat5a","Stat5b"]
GO:0001776	3	leukocyte homeostasis	4	68	0.472559	0.00129372	0.00283326	["Foxp3","Mecom","Stat5a","Stat5b"]
GO:0002286	6	T cell activation involved in immune response	4	68	0.472559	0.00129372	0.00283326	["Foxp1","Lef1","Relb","Trp53"]
GO:0002467	4	germinal center formation	2	8	0.0555952	0.00130722	0.00283326	["Bcl6","Nfkb2"]
GO:0003309	10	type B pancreatic cell differentiation	2	8	0.0555952	0.00130722	0.00283326	["Gata6","Pax6"]
GO:0006573	6	valine metabolic process	2	8	0.0555952	0.00130722	0.00283326	["Stat5a","Stat5b"]
GO:0021781	6	glial cell fate commitment	2	8	0.0555952	0.00130722	0.00283326	["Sox8","Sox9"]
GO:0032908	7	regulation of transforming growth factor beta1 production	2	8	0.0555952	0.00130722	0.00283326	["Foxp3","Gata6"]
GO:0035947	8	regulation of gluconeogenesis by regulation of transcription from RNA polymerase II promoter	2	8	0.0555952	0.00130722	0.00283326	["Foxo1","Tcf7l2"]
GO:0045084	8	positive regulation of interleukin-12 biosynthetic process	2	8	0.0555952	0.00130722	0.00283326	["Irf1","Rela"]
GO:0045627	8	positive regulation of T-helper 1 cell differentiation	2	8	0.0555952	0.00130722	0.00283326	["Hlx","Irf1"]
GO:0046532	9	regulation of photoreceptor cell differentiation	2	8	0.0555952	0.00130722	0.00283326	["Sox8","Sox9"]
GO:0046645	9	positive regulation of gamma-delta T cell activation	2	8	0.0555952	0.00130722	0.00283326	["Stat5a","Stat5b"]
GO:0048548	6	regulation of pinocytosis	2	8	0.0555952	0.00130722	0.00283326	["Nr1h2","Nr1h3"]
GO:0051890	6	regulation of cardioblast differentiation	2	8	0.0555952	0.00130722	0.00283326	["Gata6","Tbx5"]
GO:0060019	7	radial glial cell differentiation	2	8	0.0555952	0.00130722	0.00283326	["Lef1","Stat3"]
GO:0060340	8	positive regulation of type I interferon-mediated signaling pathway	2	8	0.0555952	0.00130722	0.00283326	["Irf3","Irf7"]
GO:0001649	6	osteoblast differentiation	5	116	0.80613	0.00131191	0.00284033	["Junb","Lef1","Nr1i3","Shox2","Sox8"]
GO:0070848	5	response to growth factor	8	304	2.11262	0.00132713	0.00287018	["Ctnnb1","Gata6","Nr4a1","Pax6","Sox5","Sox6","Sox9","Stat5b"]
GO:0042594	4	response to starvation	6	173	1.20225	0.00134587	0.0029068	["Atf4","Foxa3","Foxo1","Jun","Tcf7l2","Trp53"]
GO:0098542	4	defense response to other organism	9	378	2.62687	0.00134698	0.0029068	["Cebpb","Irf1","Irf3","Irf4","Irf5","Irf7","Irf8","Irf9","Rela"]
GO:0002220	6	innate immune response activating cell surface receptor signaling pathway	5	117	0.813079	0.00136291	0.00293799	["Nfatc2","Nfkb1","Nfkb2","Rela","Relb"]
GO:0071216	4	cellular response to biotic stimulus	7	237	1.64701	0.00137675	0.00296463	["Irf3","Irf8","Nfkb1","Nr1h3","Rara","Rela","Trp53"]
GO:0030316	8	osteoclast differentiation	3	32	0.222381	0.00140835	0.00302613	["Ctnnb1","Foxp1","Junb"]
GO:0043029	5	T cell homeostasis	3	32	0.222381	0.00140835	0.00302613	["Foxp3","Stat5a","Stat5b"]
GO:0051052	6	regulation of DNA metabolic process	8	307	2.13346	0.00141214	0.00303101	["Bcl6","Cebpg","Ctnnb1","Foxp3","Hmga2","Jun","Stat6","Trp53"]
GO:0050671	8	positive regulation of lymphocyte proliferation	5	118	0.820029	0.00141535	0.00303464	["Bcl6","Foxp3","Nfatc2","Stat5a","Stat5b"]
GO:0010563	7	negative regulation of phosphorus metabolic process	11	540	3.75267	0.00142726	0.00305359	["Cebpa","Foxa2","Foxo1","Irf1","Jun","Mecom","Nr2f2","Pax6","Stat3","Trp53","Trp73"]
GO:0045936	8	negative regulation of phosphate metabolic process	11	540	3.75267	0.00142726	0.00305359	["Cebpa","Foxa2","Foxo1","Irf1","Jun","Mecom","Nr2f2","Pax6","Stat3","Trp53","Trp73"]
GO:0019216	6	regulation of lipid metabolic process	8	308	2.14041	0.00144142	0.00308059	["Foxa2","Nfkb1","Nr1h2","Nr1h3","Rara","Stat5a","Stat5b","Tcf7l2"]
GO:0045471	6	response to ethanol	6	176	1.22309	0.00146923	0.00313667	["Pax6","Rara","Rxra","Stat3","Stat5a","Stat5b"]
GO:0006109	6	regulation of carbohydrate metabolic process	6	177	1.23004	0.00151221	0.00322321	["Foxa2","Foxo1","Nfkb1","Stat3","Tcf7l2","Trp53"]
GO:0031400	8	negative regulation of protein modification process	11	544	3.78047	0.001513	0.00322321	["Cebpa","Ctnnb1","Foxo1","Foxp3","Gfi1b","Irf1","Jun","Mecom","Nr2f2","Pax6","Trp73"]
GO:0032946	8	positive regulation of mononuclear cell proliferation	5	120	0.833927	0.00152469	0.00324465	["Bcl6","Foxp3","Nfatc2","Stat5a","Stat5b"]
GO:0003156	7	regulation of organ formation	3	33	0.22933	0.00154134	0.00327309	["Ctnnb1","Six1","Tbx5"]
GO:0060421	7	positive regulation of heart growth	3	33	0.22933	0.00154134	0.00327309	["Gata6","Tbx2","Tbx5"]
GO:0048839	4	inner ear development	4	72	0.500356	0.00159964	0.00339329	["Cebpa","Lhx3","Six1","Sox9"]
GO:0002645	6	positive regulation of tolerance induction	2	9	0.0625445	0.00167305	0.00350426	["Foxj1","Foxp3"]
GO:0003203	6	endocardial cushion morphogenesis	2	9	0.0625445	0.00167305	0.00350426	["Sox9","Tbx2"]
GO:0006600	5	creatine metabolic process	2	9	0.0625445	0.00167305	0.00350426	["Stat5a","Stat5b"]
GO:0014842	6	regulation of satellite cell proliferation	2	9	0.0625445	0.00167305	0.00350426	["Six1","Stat3"]
GO:0031507	6	heterochromatin assembly	2	9	0.0625445	0.00167305	0.00350426	["Hmga1","Hmga2"]
GO:0032736	7	positive regulation of interleukin-13 production	2	9	0.0625445	0.00167305	0.00350426	["Irf4","Rara"]
GO:0033173	9	calcineurin-NFAT signaling cascade	2	9	0.0625445	0.00167305	0.00350426	["Nfatc2","Nfatc4"]
GO:0061009	4	common bile duct development	2	9	0.0625445	0.00167305	0.00350426	["Sox17","Sox9"]
GO:0072074	6	kidney mesenchyme development	2	9	0.0625445	0.00167305	0.00350426	["Foxd1","Six1"]
GO:0072172	8	mesonephric tubule formation	2	9	0.0625445	0.00167305	0.00350426	["Hnf1b","Six1"]
GO:0090186	7	regulation of pancreatic juice secretion	2	9	0.0625445	0.00167305	0.00350426	["Nr1h2","Nr1h3"]
GO:1901142	5	insulin metabolic process	2	9	0.0625445	0.00167305	0.00350426	["Pax6","Tcf7l2"]
GO:0002707	8	negative regulation of lymphocyte mediated immunity	3	34	0.236279	0.00168194	0.00350448	["Bcl6","Foxj1","Foxp3"]
GO:0002753	7	cytoplasmic pattern recognition receptor signaling pathway	3	34	0.236279	0.00168194	0.00350448	["Irf3","Irf7","Rela"]
GO:0030513	8	positive regulation of BMP signaling pathway	3	34	0.236279	0.00168194	0.00350448	["Foxd1","Gata6","Sox11"]
GO:0046006	9	regulation of activated T cell proliferation	3	34	0.236279	0.00168194	0.00350448	["Foxp3","Stat5a","Stat5b"]
GO:0048864	5	stem cell development	3	34	0.236279	0.00168194	0.00350448	["Foxc1","Sox11","Sox9"]
GO:0034504	7	protein localization to nucleus	5	124	0.861725	0.00176185	0.00366332	["Jun","Six1","Sox9","Stat3","Tcf7l2"]
GO:0070665	7	positive regulation of leukocyte proliferation	5	124	0.861725	0.00176185	0.00366332	["Bcl6","Foxp3","Nfatc2","Stat5a","Stat5b"]
GO:0042472	5	inner ear morphogenesis	4	74	0.514255	0.00177002	0.00367264	["Foxg1","Foxi1","Mafb","Six1"]
GO:0048661	7	positive regulation of smooth muscle cell proliferation	4	74	0.514255	0.00177002	0.00367264	["Foxp1","Jun","Stat5b","Zfp143"]
GO:0071214	4	cellular response to abiotic stimulus	8	319	2.21686	0.00179645	0.00372362	["Ctnnb1","Irf1","Nfatc4","Nfkb1","Relb","Sox9","Trp53","Trp73"]
GO:0032743	7	positive regulation of interleukin-2 production	3	35	0.243229	0.00183031	0.003782	["Irf4","Stat5a","Stat5b"]
GO:0040019	6	positive regulation of embryonic development	3	35	0.243229	0.00183031	0.003782	["Ctnnb1","Foxa2","Six1"]
GO:0070059	6	intrinsic apoptotic signaling pathway in response to endoplasmic reticulum stress	3	35	0.243229	0.00183031	0.003782	["Atf4","Cebpb","Trp53"]
GO:0051817	4	modification of morphology or physiology of other organism involved in symbiotic interaction	4	75	0.521205	0.00185975	0.00383886	["Hmga2","Jun","Lef1","Rxra"]
GO:0051099	5	positive regulation of binding	5	126	0.875624	0.00189007	0.00389742	["Cebpg","Hmga2","Irf4","Rara","Tcf7l2"]
GO:0023056	5	positive regulation of signaling	21	1515	10.5283	0.00190183	0.00391761	["Ctnnb1","Foxa2","Foxd1","Gata6","Irf3","Irf7","Nfatc4","Nfkb1","Nr1h3","Nr2e1","Pax6","Pou5f1","Rara","Rela","Shox2","Sox11","Sox9","Stat3","Tcf7l2","Trp53","Trp73"]
GO:0051130	5	positive regulation of cellular component organization	18	1210	8.40877	0.00190487	0.00391982	["Arid5a","Bcl6","Ctnnb1","Foxp3","Gfi1b","Hnf1a","Hnf1b","Irf8","Jdp2","Jun","Lef1","Myb","Nfatc2","Nr1h2","Pax7","Shox2","Sox9","Trp53"]
GO:0048565	4	digestive tract development	4	76	0.528154	0.00195258	0.00401347	["Alx4","Ctnnb1","Myb","Rxra"]
GO:0044092	4	negative regulation of molecular function	17	1114	7.74163	0.0019544	0.00401347	["Cebpa","Cebpg","Foxa2","Foxj1","Foxp3","Hmga2","Jun","Lef1","Nfatc4","Nfkb1","Nr2f2","Nr4a1","Pbx1","Sox11","Tcf7l2","Trp73","Zfp90"]
GO:0000578	6	embryonic axis specification	3	36	0.250178	0.00198659	0.00406701	["Ctnnb1","Foxa2","Tbx3"]
GO:0021795	7	cerebral cortex cell migration	3	36	0.250178	0.00198659	0.00406701	["Arx","Foxg1","Pou3f3"]
GO:0032715	7	negative regulation of interleukin-6 production	3	36	0.250178	0.00198659	0.00406701	["Foxj1","Foxp3","Klf2"]
GO:0010647	6	positive regulation of cell communication	21	1521	10.57	0.00199487	0.00407976	["Ctnnb1","Foxa2","Foxd1","Gata6","Irf3","Irf7","Nfatc4","Nfkb1","Nr1h3","Nr2e1","Pax6","Pou5f1","Rara","Rela","Shox2","Sox11","Sox9","Stat3","Tcf7l2","Trp53","Trp73"]
GO:0042326	9	negative regulation of phosphorylation	9	402	2.79366	0.0020494	0.00418698	["Cebpa","Foxa2","Foxo1","Irf1","Jun","Mecom","Nr2f2","Pax6","Trp73"]
GO:0002507	3	tolerance induction	2	10	0.0694939	0.00208178	0.004193	["Foxj1","Foxp3"]
GO:0002638	8	negative regulation of immunoglobulin production	2	10	0.0694939	0.00208178	0.004193	["Bcl6","Foxp3"]
GO:0003211	5	cardiac ventricle formation	2	10	0.0694939	0.00208178	0.004193	["Sox11","Tbx5"]
GO:0003417	5	growth plate cartilage development	2	10	0.0694939	0.00208178	0.004193	["Rara","Rarg"]
GO:0019043	5	establishment of viral latency	2	10	0.0694939	0.00208178	0.004193	["Hmga1","Irf7"]
GO:0032688	8	negative regulation of interferon-beta production	2	10	0.0694939	0.00208178	0.004193	["Irf3","Relb"]
GO:0035883	9	enteroendocrine cell differentiation	2	10	0.0694939	0.00208178	0.004193	["Gata6","Pax6"]
GO:0042118	5	endothelial cell activation	2	10	0.0694939	0.00208178	0.004193	["Foxp1","Hoxa9"]
GO:0048537	5	mucosal-associated lymphoid tissue development	2	10	0.0694939	0.00208178	0.004193	["Stat5a","Stat5b"]
GO:0048541	6	Peyer's patch development	2	10	0.0694939	0.00208178	0.004193	["Stat5a","Stat5b"]
GO:0060039	6	pericardium development	2	10	0.0694939	0.00208178	0.004193	["Mecom","Tbx5"]
GO:0060174	4	limb bud formation	2	10	0.0694939	0.00208178	0.004193	["Sox11","Sox9"]
GO:0060947	7	cardiac vascular smooth muscle cell differentiation	2	10	0.0694939	0.00208178	0.004193	["Ctnnb1","Gata6"]
GO:0072364	7	regulation of cellular ketone metabolic process by regulation of transcription from RNA polymerase II promoter	2	10	0.0694939	0.00208178	0.004193	["Foxo1","Tcf7l2"]
GO:0043627	6	response to estrogen	8	328	2.2794	0.00213556	0.00429698	["Ctnnb1","Fosl2","Foxj1","Gata6","Nr2f2","Rara","Stat3","Stat5b"]
GO:0002562	4	somatic diversification of immune receptors via germline recombination within a single locus	3	37	0.257128	0.00215094	0.00431487	["Foxp1","Lef1","Tcf7"]
GO:0016444	7	somatic cell DNA recombination	3	37	0.257128	0.00215094	0.00431487	["Foxp1","Lef1","Tcf7"]
GO:0048738	7	cardiac muscle tissue development	3	37	0.257128	0.00215094	0.00431487	["Gata6","Tbx2","Tbx5"]
GO:0032868	6	response to insulin	6	191	1.32733	0.00222017	0.00444926	["Egr2","Foxa2","Foxo1","Pax6","Rela","Rxra"]
GO:0032371	7	regulation of sterol transport	3	38	0.264077	0.0023235	0.00463305	["Nfkb1","Nr1h2","Nr1h3"]
GO:0032374	8	regulation of cholesterol transport	3	38	0.264077	0.0023235	0.00463305	["Nfkb1","Nr1h2","Nr1h3"]
GO:0040018	6	positive regulation of multicellular organism growth	3	38	0.264077	0.0023235	0.00463305	["Hmga2","Stat5a","Stat5b"]
GO:0043278	6	response to morphine	3	38	0.264077	0.0023235	0.00463305	["Fosb","Fosl2","Rela"]
GO:0090207	6	regulation of triglyceride metabolic process	3	38	0.264077	0.0023235	0.00463305	["Nr1h2","Nr1h3","Tcf7l2"]
GO:0031960	6	response to corticosteroid	7	260	1.80684	0.00232621	0.00463382	["Cebpa","Fos","Fosb","Fosl2","Junb","Rxra","Sox30"]
GO:0000077	6	DNA damage checkpoint	4	80	0.555952	0.00235605	0.00468391	["Foxo4","Hmga2","Trp53","Trp73"]
GO:0035821	3	modification of morphology or physiology of other organism	4	80	0.555952	0.00235605	0.00468391	["Hmga2","Jun","Lef1","Rxra"]
GO:0045667	6	regulation of osteoblast differentiation	5	133	0.924269	0.00239298	0.00475258	["Cebpa","Cebpb","Ctnnb1","Jund","Sox11"]
GO:0071407	6	cellular response to organic cyclic compound	9	412	2.86315	0.00241708	0.00479091	["Cebpa","Ctnnb1","Egr2","Irf1","Irf3","Klf2","Nfkb1","Rara","Rela"]
GO:1903034	6	regulation of response to wounding	9	412	2.86315	0.00241708	0.00479091	["Bcl6","Foxa2","Foxp1","Foxp3","Nfkb1","Nr1h3","Rela","Stat5a","Stat5b"]
GO:0002708	8	positive regulation of lymphocyte mediated immunity	4	81	0.562901	0.00246522	0.0048718	["Foxp3","Stat5a","Stat5b","Stat6"]
GO:0040014	5	regulation of multicellular organism growth	4	81	0.562901	0.00246522	0.0048718	["Hmga2","Stat3","Stat5a","Stat5b"]
GO:0060021	4	palate development	4	81	0.562901	0.00246522	0.0048718	["Alx4","Lef1","Tbx2","Tbx3"]
GO:0002250	4	adaptive immune response	5	134	0.931219	0.00247203	0.00488043	["Bcl6","Foxp3","Irf7","Nfkb2","Relb"]
GO:0010470	6	regulation of gastrulation	3	39	0.271026	0.00250439	0.00492968	["Foxa2","Hnf1b","Sox17"]
GO:0010883	5	regulation of lipid storage	3	39	0.271026	0.00250439	0.00492968	["Nfkb1","Nr1h2","Nr1h3"]
GO:0014072	6	response to isoquinoline alkaloid	3	39	0.271026	0.00250439	0.00492968	["Fosb","Fosl2","Rela"]
GO:0002634	6	regulation of germinal center formation	2	11	0.0764433	0.00253281	0.00493688	["Bcl6","Foxj1"]
GO:0003207	4	cardiac chamber formation	2	11	0.0764433	0.00253281	0.00493688	["Sox11","Tbx5"]
GO:0006105	8	succinate metabolic process	2	11	0.0764433	0.00253281	0.00493688	["Stat5a","Stat5b"]
GO:0030854	9	positive regulation of granulocyte differentiation	2	11	0.0764433	0.00253281	0.00493688	["Gfi1b","Lef1"]
GO:0048617	5	embryonic foregut morphogenesis	2	11	0.0764433	0.00253281	0.00493688	["Ctnnb1","Sox17"]
GO:0051006	8	positive regulation of lipoprotein lipase activity	2	11	0.0764433	0.00253281	0.00493688	["Nr1h2","Nr1h3"]
GO:0051195	7	negative regulation of cofactor metabolic process	2	11	0.0764433	0.00253281	0.00493688	["Stat3","Trp53"]
GO:0051198	8	negative regulation of coenzyme metabolic process	2	11	0.0764433	0.00253281	0.00493688	["Stat3","Trp53"]
GO:0071316	7	cellular response to nicotine	2	11	0.0764433	0.00253281	0.00493688	["Nfkb1","Rela"]
GO:2001054	9	negative regulation of mesenchymal cell apoptotic process	2	11	0.0764433	0.00253281	0.00493688	["Hnf1b","Sox9"]
GO:0001569	5	patterning of blood vessels	3	40	0.277976	0.00269377	0.00523551	["Ctnnb1","Lef1","Nfatc4"]
GO:0002824	8	positive regulation of adaptive immune response based on somatic recombination of immune receptors built from immunoglobulin superfamily domains	4	83	0.5768	0.0026939	0.00523551	["Foxp3","Hlx","Irf1","Stat6"]
GO:1901216	7	positive regulation of neuron death	4	83	0.5768	0.0026939	0.00523551	["Atf4","Foxo3","Jun","Trp53"]
GO:0009967	6	positive regulation of signal transduction	19	1353	9.40253	0.00272666	0.00529401	["Ctnnb1","Foxa2","Foxd1","Gata6","Irf3","Irf7","Nfatc4","Nfkb1","Nr1h3","Pou5f1","Rara","Rela","Shox2","Sox11","Sox9","Stat3","Tcf7l2","Trp53","Trp73"]
GO:0001101	4	response to acid chemical	10	502	3.4886	0.00274461	0.00532369	["Cebpb","Irf1","Pax6","Pou5f1","Rara","Rarg","Rela","Rxra","Rxrb","Sox9"]
GO:0045666	7	positive regulation of neuron differentiation	8	343	2.38364	0.00281081	0.00544674	["Bcl6","Foxa2","Foxg1","Hoxd3","Irx3","Rara","Shox2","Sox11"]
GO:0002526	6	acute inflammatory response	4	84	0.583749	0.00281351	0.00544674	["Cebpa","Cebpb","Stat3","Stat5b"]
GO:0009948	6	anterior/posterior axis specification	3	41	0.284925	0.00289175	0.00557654	["Ctnnb1","Foxa2","Tbx3"]
GO:0010226	6	response to lithium ion	3	41	0.284925	0.00289175	0.00557654	["Cebpa","Lef1","Nfatc4"]
GO:0043388	6	positive regulation of DNA binding	3	41	0.284925	0.00289175	0.00557654	["Cebpg","Hmga2","Irf4"]
GO:2000737	7	negative regulation of stem cell differentiation	3	41	0.284925	0.00289175	0.00557654	["Foxa2","Hnf1b","Tbx5"]
GO:0009798	5	axis specification	4	85	0.590699	0.00293671	0.00565233	["Ctnnb1","Foxa2","Pax6","Tbx3"]
GO:0030510	7	regulation of BMP signaling pathway	4	85	0.590699	0.00293671	0.00565233	["Foxd1","Gata6","Sox11","Tcf7l2"]
GO:0001945	4	lymph vessel development	2	12	0.0833927	0.00302554	0.00571842	["Foxc1","Nr2f2"]
GO:0006107	8	oxaloacetate metabolic process	2	12	0.0833927	0.00302554	0.00571842	["Stat5a","Stat5b"]
GO:0010745	7	negative regulation of macrophage derived foam cell differentiation	2	12	0.0833927	0.00302554	0.00571842	["Nr1h2","Nr1h3"]
GO:0014009	4	glial cell proliferation	2	12	0.0833927	0.00302554	0.00571842	["Ctnnb1","Sox11"]
GO:0014857	6	regulation of skeletal muscle cell proliferation	2	12	0.0833927	0.00302554	0.00571842	["Six1","Stat3"]
GO:0030850	4	prostate gland development	2	12	0.0833927	0.00302554	0.00571842	["Rara","Sox9"]
GO:0043922	8	negative regulation by host of viral transcription	2	12	0.0833927	0.00302554	0.00571842	["Hmga2","Jun"]
GO:0043923	8	positive regulation by host of viral transcription	2	12	0.0833927	0.00302554	0.00571842	["Jun","Lef1"]
GO:0045625	7	regulation of T-helper 1 cell differentiation	2	12	0.0833927	0.00302554	0.00571842	["Hlx","Irf1"]
GO:0045945	9	positive regulation of transcription from RNA polymerase III promoter	2	12	0.0833927	0.00302554	0.00571842	["Cebpa","Foxa2"]
GO:0060044	6	negative regulation of cardiac muscle cell proliferation	2	12	0.0833927	0.00302554	0.00571842	["Tbx5","Trp73"]
GO:0061053	4	somite development	2	12	0.0833927	0.00302554	0.00571842	["Meox1","Sox11"]
GO:0061303	4	cornea development in camera-type eye	2	12	0.0833927	0.00302554	0.00571842	["Pax6","Sox11"]
GO:0061365	8	positive regulation of triglyceride lipase activity	2	12	0.0833927	0.00302554	0.00571842	["Nr1h2","Nr1h3"]
GO:0072148	6	epithelial cell fate commitment	2	12	0.0833927	0.00302554	0.00571842	["Arx","Rara"]
GO:0098586	5	cellular response to virus	2	12	0.0833927	0.00302554	0.00571842	["Irf3","Irf7"]
GO:1902337	6	regulation of apoptotic process involved in morphogenesis	2	12	0.0833927	0.00302554	0.00571842	["Foxc1","Hnf1b"]
GO:2000188	5	regulation of cholesterol homeostasis	2	12	0.0833927	0.00302554	0.00571842	["Nr1h2","Nr1h3"]
GO:2000628	7	regulation of miRNA metabolic process	2	12	0.0833927	0.00302554	0.00571842	["Nfkb1","Rela"]
GO:0006974	5	cellular response to DNA damage stimulus	12	685	4.76033	0.00306763	0.00579247	["Bcl6","Foxo1","Foxo3","Foxo4","Hmga1","Hmga2","Irf3","Irf7","Nfatc2","Nfatc4","Trp53","Trp73"]
GO:0051592	6	response to calcium ion	5	141	0.979865	0.00307956	0.00580951	["Fos","Fosb","Jun","Junb","Jund"]
GO:0001707	5	mesoderm formation	3	42	0.291875	0.00309846	0.00582861	["Foxc1","Hnf1a","Lef1"]
GO:0032873	8	negative regulation of stress-activated MAPK cascade	3	42	0.291875	0.00309846	0.00582861	["Foxo1","Mecom","Trp73"]
GO:0070303	7	negative regulation of stress-activated protein kinase signaling cascade	3	42	0.291875	0.00309846	0.00582861	["Foxo1","Mecom","Trp73"]
GO:0048011	8	neurotrophin TRK receptor signaling pathway	7	275	1.91108	0.00317566	0.00596821	["Foxo1","Foxo3","Foxo4","Nfkb1","Nr4a1","Rela","Stat3"]
GO:0007399	5	nervous system development	10	514	3.57199	0.00324669	0.00609595	["Arx","Ctnnb1","Fos","Mafk","Nr2e1","Pou3f3","Shox2","Sox11","Stat3","Uncx"]
GO:0002762	8	negative regulation of myeloid leukocyte differentiation	3	43	0.298824	0.00331403	0.00621653	["Ctnnb1","Mafb","Rara"]
GO:0071222	6	cellular response to lipopolysaccharide	6	208	1.44547	0.00338673	0.00634693	["Irf3","Irf8","Nfkb1","Nr1h3","Rara","Rela"]
GO:0038179	7	neurotrophin signaling pathway	7	279	1.93888	0.00343785	0.00643669	["Foxo1","Foxo3","Foxo4","Nfkb1","Nr4a1","Rela","Stat3"]
GO:0002821	7	positive regulation of adaptive immune response	4	89	0.618496	0.00346643	0.00648411	["Foxp3","Hlx","Irf1","Stat6"]
GO:0002200	3	somatic diversification of immune receptors	3	44	0.305773	0.00353856	0.00656558	["Foxp1","Lef1","Tcf7"]
GO:0030857	7	negative regulation of epithelial cell differentiation	3	44	0.305773	0.00353856	0.00656558	["Foxp1","Sox9","Tbx3"]
GO:1903309	6	negative regulation of chromatin modification	3	44	0.305773	0.00353856	0.00656558	["Foxp3","Gfi1b","Hmga1"]
GO:0001553	4	luteinization	2	13	0.0903421	0.00355937	0.00656558	["Stat5a","Stat5b"]
GO:0010885	6	regulation of cholesterol storage	2	13	0.0903421	0.00355937	0.00656558	["Nr1h2","Nr1h3"]
GO:0021819	4	layer formation in cerebral cortex	2	13	0.0903421	0.00355937	0.00656558	["Ctnnb1","Nr2e1"]
GO:0030431	4	sleep	2	13	0.0903421	0.00355937	0.00656558	["Fos","Fosl2"]
GO:0031076	5	embryonic camera-type eye development	2	13	0.0903421	0.00355937	0.00656558	["Rara","Rarg"]
GO:0031571	8	mitotic G1 DNA damage checkpoint	2	13	0.0903421	0.00355937	0.00656558	["Trp53","Trp73"]
GO:0045589	9	regulation of regulatory T cell differentiation	2	13	0.0903421	0.00355937	0.00656558	["Foxp3","Irf1"]
GO:0060272	7	embryonic skeletal joint morphogenesis	2	13	0.0903421	0.00355937	0.00656558	["Ctnnb1","Shox2"]
GO:0061140	8	lung secretory cell differentiation	2	13	0.0903421	0.00355937	0.00656558	["Foxp1","Gata6"]
GO:0070828	5	heterochromatin organization	2	13	0.0903421	0.00355937	0.00656558	["Hmga1","Hmga2"]
GO:0072170	5	metanephric tubule development	2	13	0.0903421	0.00355937	0.00656558	["Pou3f3","Sox9"]
GO:1901213	9	regulation of transcription from RNA polymerase II promoter involved in heart development	2	13	0.0903421	0.00355937	0.00656558	["Pou5f1","Tbx2"]
GO:0031570	6	DNA integrity checkpoint	4	90	0.625445	0.00360835	0.00664362	["Foxo4","Hmga2","Trp53","Trp73"]
GO:0055001	5	muscle cell development	4	90	0.625445	0.00360835	0.00664362	["Lef1","Nfatc2","Nfatc4","Tbx3"]
GO:0044089	5	positive regulation of cellular component biogenesis	8	359	2.49483	0.00370407	0.00681358	["Ctnnb1","Hnf1a","Hnf1b","Irf8","Jun","Nr1h2","Sox9","Trp53"]
GO:0032649	6	regulation of interferon-gamma production	4	91	0.632395	0.00375416	0.00689299	["Cebpg","Foxp3","Irf8","Rara"]
GO:0051053	7	negative regulation of DNA metabolic process	4	91	0.632395	0.00375416	0.00689299	["Bcl6","Foxp3","Hmga2","Trp53"]
GO:0002704	7	negative regulation of leukocyte mediated immunity	3	45	0.312723	0.00377218	0.00690067	["Bcl6","Foxj1","Foxp3"]
GO:0021510	4	spinal cord development	3	45	0.312723	0.00377218	0.00690067	["Pax6","Sox11","Sox12"]
GO:0021915	4	neural tube development	3	45	0.312723	0.00377218	0.00690067	["Sall4","Tcf7","Tcf7l2"]
GO:0055010	7	ventricular cardiac muscle tissue morphogenesis	3	45	0.312723	0.00377218	0.00690067	["Ctnnb1","Foxc1","Rxra"]
GO:0031348	6	negative regulation of defense response	5	150	1.04241	0.00401039	0.00732472	["Foxp3","Irf3","Nfkb1","Nr1h2","Nr1h3"]
GO:0001657	5	ureteric bud development	3	46	0.319672	0.004015	0.00732472	["Foxc1","Rara","Six1"]
GO:0051851	5	modification by host of symbiont morphology or physiology	3	46	0.319672	0.004015	0.00732472	["Hmga2","Jun","Lef1"]
GO:0000302	5	response to reactive oxygen species	6	216	1.50107	0.00407139	0.0074208	["Fos","Foxo1","Jun","Klf2","Rela","Stat6"]
GO:1903530	6	regulation of secretion by cell	12	711	4.94102	0.00412832	0.0074325	["Foxa2","Foxp1","Foxp3","Hmga2","Hnf1a","Irf3","Nr1h2","Nr1h3","Pax6","Pou5f1","Sox11","Tcf7l2"]
GO:0002643	5	regulation of tolerance induction	2	14	0.0972915	0.00413372	0.0074325	["Foxj1","Foxp3"]
GO:0006978	8	DNA damage response, signal transduction by p53 class mediator resulting in transcription of p21 class mediator	2	14	0.0972915	0.00413372	0.0074325	["Trp53","Trp73"]
GO:0009950	6	dorsal/ventral axis specification	2	14	0.0972915	0.00413372	0.0074325	["Ctnnb1","Pax6"]
GO:0010875	9	positive regulation of cholesterol efflux	2	14	0.0972915	0.00413372	0.0074325	["Nr1h2","Nr1h3"]
GO:0030812	8	negative regulation of nucleotide catabolic process	2	14	0.0972915	0.00413372	0.0074325	["Stat3","Trp53"]
GO:0032495	6	response to muramyl dipeptide	2	14	0.0972915	0.00413372	0.0074325	["Irf5","Rela"]
GO:0033598	5	mammary gland epithelial cell proliferation	2	14	0.0972915	0.00413372	0.0074325	["Cebpb","Stat6"]
GO:0035886	8	vascular smooth muscle cell differentiation	2	14	0.0972915	0.00413372	0.0074325	["Ctnnb1","Gata6"]
GO:0042789	8	mRNA transcription from RNA polymerase II promoter	2	14	0.0972915	0.00413372	0.0074325	["Pou5f1","Sox17"]
GO:0044783	7	G1 DNA damage checkpoint	2	14	0.0972915	0.00413372	0.0074325	["Trp53","Trp73"]
GO:0044819	7	mitotic G1/S transition checkpoint	2	14	0.0972915	0.00413372	0.0074325	["Trp53","Trp73"]
GO:0060795	6	cell fate commitment involved in formation of primary germ layer	2	14	0.0972915	0.00413372	0.0074325	["Ctnnb1","Pou5f1"]
GO:0071850	6	mitotic cell cycle arrest	2	14	0.0972915	0.00413372	0.0074325	["E4f1","Trp53"]
GO:2001053	8	regulation of mesenchymal cell apoptotic process	2	14	0.0972915	0.00413372	0.0074325	["Hnf1b","Sox9"]
GO:0071219	5	cellular response to molecule of bacterial origin	6	217	1.50802	0.00416367	0.00747961	["Irf3","Irf8","Nfkb1","Nr1h3","Rara","Rela"]
GO:0007259	7	JAK-STAT cascade	3	47	0.326622	0.00426713	0.00765166	["Stat3","Stat5a","Stat5b"]
GO:0045599	7	negative regulation of fat cell differentiation	3	47	0.326622	0.00426713	0.00765166	["Foxo1","Jdp2","Tcf7l2"]
GO:0016032	4	viral process	11	626	4.35032	0.00443172	0.00793253	["Cebpa","E4f1","Gtf2b","Hmga1","Irf3","Irf7","Rela","Rxra","Stat3","Tbp","Trp53"]
GO:0044403	4	symbiosis, encompassing mutualism through parasitism	11	626	4.35032	0.00443172	0.00793253	["Cebpa","E4f1","Gtf2b","Hmga1","Irf3","Irf7","Rela","Rxra","Stat3","Tbp","Trp53"]
GO:0009416	5	response to light stimulus	8	370	2.57128	0.00443585	0.00793281	["Fos","Fosl2","Junb","Jund","Nfatc4","Rela","Trp53","Trp73"]
GO:0043524	8	negative regulation of neuron apoptotic process	5	154	1.07021	0.00448264	0.00800213	["Cebpb","Dlx1","Jun","Six1","Trp73"]
GO:0043901	5	negative regulation of multi-organism process	5	154	1.07021	0.00448264	0.00800213	["Hmga2","Irf3","Irf8","Jun","Prdm1"]
GO:0060560	4	developmental growth involved in morphogenesis	4	96	0.667142	0.00454338	0.00810331	["Hnf1b","Hoxd13","Rarg","Tbx2"]
GO:0044764	3	multi-organism cellular process	11	631	4.38507	0.00470011	0.00837535	["Cebpa","E4f1","Gtf2b","Hmga1","Irf3","Irf7","Rela","Rxra","Stat3","Tbp","Trp53"]
GO:0002700	6	regulation of production of molecular mediator of immune response	4	97	0.674091	0.0047136	0.00837834	["Bcl6","Foxp1","Foxp3","Stat6"]
GO:0051149	7	positive regulation of muscle cell differentiation	4	97	0.674091	0.0047136	0.00837834	["Ctnnb1","Foxp1","Nfatc2","Shox2"]
GO:0001933	9	negative regulation of protein phosphorylation	8	374	2.59907	0.00472789	0.00837834	["Cebpa","Foxo1","Irf1","Jun","Mecom","Nr2f2","Pax6","Trp73"]
GO:0001779	6	natural killer cell differentiation	2	15	0.104241	0.00474801	0.00837834	["Stat5a","Stat5b"]
GO:0007095	8	mitotic G2 DNA damage checkpoint	2	15	0.104241	0.00474801	0.00837834	["Foxo4","Hmga2"]
GO:0042772	7	DNA damage response, signal transduction resulting in transcription	2	15	0.104241	0.00474801	0.00837834	["Trp53","Trp73"]
GO:0043277	5	apoptotic cell clearance	2	15	0.104241	0.00474801	0.00837834	["Nr1h3","Rara"]
GO:0051570	10	regulation of histone H3-K9 methylation	2	15	0.104241	0.00474801	0.00837834	["Gfi1b","Myb"]
GO:0060065	4	uterus development	2	15	0.104241	0.00474801	0.00837834	["Hoxa10","Hoxa9"]
GO:0060969	6	negative regulation of gene silencing	2	15	0.104241	0.00474801	0.00837834	["Hmga1","Pou5f1"]
GO:0072207	7	metanephric epithelium development	2	15	0.104241	0.00474801	0.00837834	["Pou3f3","Sox9"]
GO:0045600	7	positive regulation of fat cell differentiation	3	49	0.34052	0.00479969	0.00845458	["Cebpa","Cebpb","Mecom"]
GO:0051702	4	interaction with symbiont	3	49	0.34052	0.00479969	0.00845458	["Hmga2","Jun","Lef1"]
GO:0019218	7	regulation of steroid metabolic process	4	98	0.681041	0.00488806	0.00860264	["Foxa2","Nfkb1","Stat5a","Stat5b"]
GO:0007154	4	cell communication	15	1018	7.07448	0.00495662	0.00871561	["Atf4","Ctnnb1","Fos","Foxa3","Foxo1","Hmga2","Jun","Lhx5","Pou2f1","Six1","Sox8","Sox9","Tbx5","Tcf7l2","Trp53"]
GO:0022029	6	telencephalon cell migration	3	50	0.34747	0.00508033	0.00892527	["Arx","Foxg1","Pou3f3"]
GO:0071229	5	cellular response to acid chemical	7	300	2.08482	0.00509506	0.00894326	["Cebpb","Irf1","Pax6","Rara","Rarg","Rxrb","Sox9"]
GO:0002705	7	positive regulation of leukocyte mediated immunity	4	100	0.694939	0.00524988	0.00919883	["Foxp3","Stat5a","Stat5b","Stat6"]
GO:0071260	5	cellular response to mechanical stimulus	4	100	0.694939	0.00524988	0.00919883	["Ctnnb1","Irf1","Nfkb1","Sox9"]
GO:0021515	6	cell differentiation in spinal cord	3	51	0.354419	0.00537067	0.00934973	["Lhx3","Lhx5","Pax7"]
GO:0045661	7	regulation of myoblast differentiation	3	51	0.354419	0.00537067	0.00934973	["Sox8","Sox9","Tbx3"]
GO:0045912	6	negative regulation of carbohydrate metabolic process	3	51	0.354419	0.00537067	0.00934973	["Foxa2","Stat3","Trp53"]
GO:0010560	8	positive regulation of glycoprotein biosynthetic process	2	16	0.11119	0.00540165	0.00934973	["Ctnnb1","Tcf7l2"]
GO:0010888	5	negative regulation of lipid storage	2	16	0.11119	0.00540165	0.00934973	["Nr1h2","Nr1h3"]
GO:0031293	7	membrane protein intracellular domain proteolysis	2	16	0.11119	0.00540165	0.00934973	["Nfkb1","Rela"]
GO:0032373	7	positive regulation of sterol transport	2	16	0.11119	0.00540165	0.00934973	["Nr1h2","Nr1h3"]
GO:0032376	8	positive regulation of cholesterol transport	2	16	0.11119	0.00540165	0.00934973	["Nr1h2","Nr1h3"]
GO:0043586	5	tongue development	2	16	0.11119	0.00540165	0.00934973	["Lef1","Six1"]
GO:0048596	7	embryonic camera-type eye morphogenesis	2	16	0.11119	0.00540165	0.00934973	["Pax6","Tbx2"]
GO:0051004	7	regulation of lipoprotein lipase activity	2	16	0.11119	0.00540165	0.00934973	["Nr1h2","Nr1h3"]
GO:0051571	9	positive regulation of histone H3-K4 methylation	2	16	0.11119	0.00540165	0.00934973	["Ctnnb1","Myb"]
GO:0055022	8	negative regulation of cardiac muscle tissue growth	2	16	0.11119	0.00540165	0.00934973	["Tbx5","Trp73"]
GO:0061117	7	negative regulation of heart growth	2	16	0.11119	0.00540165	0.00934973	["Tbx5","Trp73"]
GO:0001678	6	cellular glucose homeostasis	4	101	0.701889	0.00543734	0.00938706	["Foxa3","Foxo1","Pax6","Tcf7l2"]
GO:0002285	5	lymphocyte activation involved in immune response	4	101	0.701889	0.00543734	0.00938706	["Foxp1","Lef1","Relb","Trp53"]
GO:0032675	6	regulation of interleukin-6 production	4	101	0.701889	0.00543734	0.00938706	["Cebpb","Foxj1","Foxp3","Klf2"]
GO:0007178	8	transmembrane receptor protein serine/threonine kinase signaling pathway	6	231	1.60531	0.00562418	0.00970122	["Fos","Jun","Junb","Lef1","Pou5f1","Trp53"]
GO:0001756	4	somitogenesis	3	52	0.361368	0.00567079	0.00976472	["Foxc1","Lef1","Trp53"]
GO:0009409	4	response to cold	3	52	0.361368	0.00567079	0.00976472	["Fos","Fosl2","Foxo1"]
GO:0090100	7	positive regulation of transmembrane receptor protein serine/threonine kinase signaling pathway	4	103	0.715788	0.00582557	0.0100226	["Foxd1","Gata6","Pou5f1","Sox11"]
GO:0010389	8	regulation of G2/M transition of mitotic cell cycle	3	53	0.368318	0.00598078	0.0102542	["Foxo4","Hmga2","Pbx1"]
GO:0021885	5	forebrain cell migration	3	53	0.368318	0.00598078	0.0102542	["Arx","Foxg1","Pou3f3"]
GO:0045843	7	negative regulation of striated muscle tissue development	3	53	0.368318	0.00598078	0.0102542	["Lef1","Tbx5","Trp73"]
GO:0060563	8	neuroepithelial cell differentiation	3	53	0.368318	0.00598078	0.0102542	["Lef1","Sox10","Sox11"]
GO:0032680	7	regulation of tumor necrosis factor production	4	104	0.722737	0.00602643	0.0103236	["Foxp1","Foxp3","Nfatc4","Rara"]
GO:0002719	7	negative regulation of cytokine production involved in immune response	2	17	0.11814	0.00609408	0.0103418	["Bcl6","Foxp3"]
GO:0002827	9	positive regulation of T-helper 1 type immune response	2	17	0.11814	0.00609408	0.0103418	["Hlx","Irf1"]
GO:0006337	5	nucleosome disassembly	2	17	0.11814	0.00609408	0.0103418	["Cebpg","Hmga1"]
GO:0007494	5	midgut development	2	17	0.11814	0.00609408	0.0103418	["Ctnnb1","Rxra"]
GO:0032986	6	protein-DNA complex disassembly	2	17	0.11814	0.00609408	0.0103418	["Cebpg","Hmga1"]
GO:0045072	7	regulation of interferon-gamma biosynthetic process	2	17	0.11814	0.00609408	0.0103418	["Cebpg","Foxp3"]
GO:0045722	8	positive regulation of gluconeogenesis	2	17	0.11814	0.00609408	0.0103418	["Foxo1","Tcf7l2"]
GO:0045910	8	negative regulation of DNA recombination	2	17	0.11814	0.00609408	0.0103418	["Bcl6","Foxp3"]
GO:0048712	10	negative regulation of astrocyte differentiation	2	17	0.11814	0.00609408	0.0103418	["Hmga2","Nr2e1"]
GO:0060644	7	mammary gland epithelial cell differentiation	2	17	0.11814	0.00609408	0.0103418	["Cebpb","Irf6"]
GO:0061548	5	ganglion development	2	17	0.11814	0.00609408	0.0103418	["Ctnnb1","Six1"]
GO:0001959	6	regulation of cytokine-mediated signaling pathway	4	105	0.729686	0.00623186	0.0105666	["Irf3","Irf7","Nr1h2","Nr1h3"]
GO:0010675	6	regulation of cellular carbohydrate metabolic process	5	167	1.16055	0.00629067	0.0106573	["Foxa2","Foxo1","Stat3","Tcf7l2","Trp53"]
GO:0045930	7	negative regulation of mitotic cell cycle	6	237	1.64701	0.0063529	0.0107535	["Ctnnb1","Foxc1","Foxo4","Hmga2","Trp53","Trp73"]
GO:0007155	3	cell adhesion	15	1049	7.28991	0.00648459	0.0109672	["Cebpb","Ctnnb1","Foxp1","Foxp3","Hoxd3","Irf1","Irf4","Lef1","Mafb","Relb","Sox9","Stat5a","Stat5b","Tcf7","Trp53"]
GO:0042130	9	negative regulation of T cell proliferation	3	55	0.382217	0.00663072	0.0111764	["Cebpb","Foxj1","Foxp3"]
GO:0048635	6	negative regulation of muscle organ development	3	55	0.382217	0.00663072	0.0111764	["Lef1","Tbx5","Trp73"]
GO:1901862	6	negative regulation of muscle tissue development	3	55	0.382217	0.00663072	0.0111764	["Lef1","Tbx5","Trp73"]
GO:1902749	8	regulation of cell cycle G2/M phase transition	3	55	0.382217	0.00663072	0.0111764	["Foxo4","Hmga2","Pbx1"]
GO:1903555	6	regulation of tumor necrosis factor superfamily cytokine production	4	107	0.743585	0.00665656	0.0112105	["Foxp1","Foxp3","Nfatc4","Rara"]
GO:0001759	6	organ induction	2	18	0.125089	0.00682474	0.0114166	["Ctnnb1","Six1"]
GO:0030851	8	granulocyte differentiation	2	18	0.125089	0.00682474	0.0114166	["Cebpa","Lef1"]
GO:0045408	7	regulation of interleukin-6 biosynthetic process	2	18	0.125089	0.00682474	0.0114166	["Cebpb","Foxj1"]
GO:0045978	8	negative regulation of nucleoside metabolic process	2	18	0.125089	0.00682474	0.0114166	["Stat3","Trp53"]
GO:0060993	5	kidney morphogenesis	2	18	0.125089	0.00682474	0.0114166	["Ctnnb1","Hnf1b"]
GO:0090185	6	negative regulation of kidney development	2	18	0.125089	0.00682474	0.0114166	["Hnf1b","Six1"]
GO:0097421	5	liver regeneration	2	18	0.125089	0.00682474	0.0114166	["Cebpb","Pou2f1"]
GO:1903020	7	positive regulation of glycoprotein metabolic process	2	18	0.125089	0.00682474	0.0114166	["Ctnnb1","Tcf7l2"]
GO:0009628	3	response to abiotic stimulus	18	1368	9.50677	0.00685887	0.0114637	["Ctnnb1","Fos","Fosb","Fosl2","Foxo1","Gata6","Irf1","Jun","Junb","Jund","Nfatc4","Nfkb1","Rela","Relb","Sox9","Stat5b","Trp53","Trp73"]
GO:0002274	4	myeloid leukocyte activation	4	108	0.750535	0.00687592	0.0114637	["Foxp1","Irf4","Jun","Relb"]
GO:0060562	5	epithelial tube morphogenesis	4	108	0.750535	0.00687592	0.0114637	["Ctnnb1","Hnf1b","Sox17","Tbx3"]
GO:2000241	4	regulation of reproductive process	4	108	0.750535	0.00687592	0.0114637	["Ctnnb1","Hoxd13","Rxra","Sox9"]
GO:0007369	4	gastrulation	3	56	0.389166	0.00697082	0.0115928	["Ctnnb1","Sox17","Trp53"]
GO:0021549	4	cerebellum development	3	56	0.389166	0.00697082	0.0115928	["Lhx5","Pax6","Trp53"]
GO:0048592	5	eye morphogenesis	3	56	0.389166	0.00697082	0.0115928	["Pax6","Rarg","Tbx2"]
GO:0051384	7	response to glucocorticoid	6	242	1.68175	0.00701078	0.0116496	["Cebpa","Fos","Fosb","Fosl2","Junb","Rxra"]
GO:0007093	6	mitotic cell cycle checkpoint	4	109	0.757484	0.00710002	0.0117782	["Foxo4","Hmga2","Trp53","Trp73"]
GO:0031100	5	organ regeneration	4	109	0.757484	0.00710002	0.0117782	["Cebpa","Cebpb","Lef1","Pou2f1"]
GO:0022610	2	biological adhesion	15	1061	7.37331	0.00716964	0.0118838	["Cebpb","Ctnnb1","Foxp1","Foxp3","Hoxd3","Irf1","Irf4","Lef1","Mafb","Relb","Sox9","Stat5a","Stat5b","Tcf7","Trp53"]
GO:0002260	4	lymphocyte homeostasis	3	57	0.396115	0.0073211	0.0121148	["Foxp3","Stat5a","Stat5b"]
GO:0006909	4	phagocytosis	3	57	0.396115	0.0073211	0.0121148	["Irf8","Nr1h3","Rara"]
GO:0051046	6	regulation of secretion	12	767	5.33019	0.00741838	0.0122655	["Foxa2","Foxp1","Foxp3","Hmga2","Hnf1a","Irf3","Nr1h2","Nr1h3","Pax6","Pou5f1","Sox11","Tcf7l2"]
GO:0060759	5	regulation of response to cytokine stimulus	4	111	0.771383	0.00756258	0.0124716	["Irf3","Irf7","Nr1h2","Nr1h3"]
GO:0003281	5	ventricular septum development	2	19	0.132038	0.00759307	0.0124716	["Sall4","Tbx5"]
GO:0021542	4	dentate gyrus development	2	19	0.132038	0.00759307	0.0124716	["Lef1","Nr2e1"]
GO:0031935	6	regulation of chromatin silencing	2	19	0.132038	0.00759307	0.0124716	["Hmga1","Pou5f1"]
GO:0035909	6	aorta morphogenesis	2	19	0.132038	0.00759307	0.0124716	["Six1","Tbx2"]
GO:0045723	8	positive regulation of fatty acid biosynthetic process	2	19	0.132038	0.00759307	0.0124716	["Nr1h2","Nr1h3"]
GO:0060707	5	trophoblast giant cell differentiation	2	19	0.132038	0.00759307	0.0124716	["Nr2f2","Prdm1"]
GO:0072080	6	nephron tubule development	2	19	0.132038	0.00759307	0.0124716	["Hnf1b","Pou3f3"]
GO:0007411	6	axon guidance	8	406	2.82145	0.007628	0.0125084	["Arx","Egr2","Foxd1","Foxp1","Lhx3","Lhx9","Mnx1","Pax6"]
GO:0097485	5	neuron projection guidance	8	406	2.82145	0.007628	0.0125084	["Arx","Egr2","Foxd1","Foxp1","Lhx3","Lhx9","Mnx1","Pax6"]
GO:0055008	6	cardiac muscle tissue morphogenesis	3	58	0.403065	0.00768164	0.0125757	["Ctnnb1","Foxc1","Rxra"]
GO:0060348	4	bone development	3	58	0.403065	0.00768164	0.0125757	["Bbx","Rara","Rarg"]
GO:0008202	5	steroid metabolic process	6	247	1.7165	0.00771672	0.0126227	["Cebpa","Hnf1a","Nr1i2","Pbx1","Rxra","Stat5b"]
GO:0010906	7	regulation of glucose metabolic process	4	113	0.785282	0.00804456	0.0131397	["Foxa2","Foxo1","Tcf7l2","Trp53"]
GO:0030218	7	erythrocyte differentiation	3	59	0.410014	0.00805251	0.0131397	["Cebpg","Nfe2l1","Sox6"]
GO:0032922	4	circadian regulation of gene expression	3	59	0.410014	0.00805251	0.0131397	["Atf4","Hnf1b","Relb"]
GO:0010769	6	regulation of cell morphogenesis involved in differentiation	7	329	2.28635	0.00829158	0.0135136	["Ctnnb1","Foxa2","Lef1","Nfatc4","Nr2e1","Shox2","Tbx5"]
GO:0050708	7	regulation of protein secretion	8	412	2.86315	0.0082952	0.0135136	["Foxa2","Foxp1","Foxp3","Hnf1a","Irf3","Nr1h2","Nr1h3","Tcf7l2"]
GO:0071824	5	protein-DNA complex subunit organization	5	179	1.24394	0.0083666	0.01356	["Cebpg","Hmga1","Hnf1b","Sox12","Sox9"]
GO:0006103	8	2-oxoglutarate metabolic process	2	20	0.138988	0.00839851	0.01356	["Stat5a","Stat5b"]
GO:0009299	7	mRNA transcription	2	20	0.138988	0.00839851	0.01356	["Pou5f1","Sox17"]
GO:0010874	9	regulation of cholesterol efflux	2	20	0.138988	0.00839851	0.01356	["Nr1h2","Nr1h3"]
GO:0010884	5	positive regulation of lipid storage	2	20	0.138988	0.00839851	0.01356	["Nfkb1","Nr1h2"]
GO:0021799	8	cerebral cortex radially oriented cell migration	2	20	0.138988	0.00839851	0.01356	["Foxg1","Pou3f3"]
GO:0033033	9	negative regulation of myeloid cell apoptotic process	2	20	0.138988	0.00839851	0.01356	["Irf7","Stat5a"]
GO:0042762	6	regulation of sulfur metabolic process	2	20	0.138988	0.00839851	0.01356	["Ctnnb1","Tcf7l2"]
GO:0044818	7	mitotic G2/M transition checkpoint	2	20	0.138988	0.00839851	0.01356	["Foxo4","Hmga2"]
GO:0071285	7	cellular response to lithium ion	2	20	0.138988	0.00839851	0.01356	["Cebpa","Nfatc4"]
GO:2000036	5	regulation of stem cell maintenance	2	20	0.138988	0.00839851	0.01356	["Hmga2","Hnf1b"]
GO:0000018	7	regulation of DNA recombination	3	60	0.416964	0.00843377	0.0136059	["Bcl6","Foxp3","Stat6"]
GO:0051155	8	positive regulation of striated muscle cell differentiation	3	61	0.423913	0.00882547	0.0142264	["Foxp1","Nfatc2","Shox2"]
GO:1902532	7	negative regulation of intracellular signal transduction	8	418	2.90485	0.00900534	0.0145046	["Bcl6","Foxo1","Hmga2","Irf1","Mecom","Pou5f1","Rela","Trp73"]
GO:0050851	6	antigen receptor-mediated signaling pathway	4	117	0.813079	0.00906809	0.0145938	["Foxp3","Nfatc2","Nfkb1","Rela"]
GO:1901988	7	negative regulation of cell cycle phase transition	5	183	1.27174	0.00915285	0.0147184	["Foxo4","Hmga2","Sox11","Trp53","Trp73"]
GO:2001022	6	positive regulation of response to DNA damage stimulus	3	62	0.430862	0.00922769	0.0147878	["Cebpg","Hmga2","Trp73"]
GO:0048016	8	inositol phosphate-mediated signaling	2	21	0.145937	0.00924052	0.0147878	["Nfatc2","Nfatc4"]
GO:0048667	7	cell morphogenesis involved in neuron differentiation	2	21	0.145937	0.00924052	0.0147878	["Foxg1","Mnx1"]
GO:0048745	6	smooth muscle tissue development	2	21	0.145937	0.00924052	0.0147878	["Foxp1","Sox9"]
GO:0061326	5	renal tubule development	2	21	0.145937	0.00924052	0.0147878	["Hnf1b","Pou3f3"]
GO:1902170	6	cellular response to reactive nitrogen species	2	21	0.145937	0.00924052	0.0147878	["Foxo1","Stat6"]
GO:0016055	7	Wnt signaling pathway	6	258	1.79294	0.00944819	0.015108	["Ctnnb1","Lef1","Rarg","Sox17","Tcf7","Tcf7l2"]
GO:0030888	8	regulation of B cell proliferation	3	63	0.437812	0.00964048	0.0153785	["Bcl6","Nfatc2","Prdm1"]
GO:0034644	7	cellular response to UV	3	63	0.437812	0.00964048	0.0153785	["Nfatc4","Trp53","Trp73"]
GO:0070301	6	cellular response to hydrogen peroxide	3	63	0.437812	0.00964048	0.0153785	["Klf2","Rela","Stat6"]
GO:0097193	7	intrinsic apoptotic signaling pathway	5	186	1.29259	0.00977501	0.0155806	["Atf4","Cebpb","Nfatc4","Trp53","Trp73"]
GO:0032102	6	negative regulation of response to external stimulus	6	260	1.80684	0.00979052	0.0155929	["Foxp3","Irf3","Nfkb1","Nr1h3","Prdm1","Trp53"]
GO:0048146	7	positive regulation of fibroblast proliferation	3	64	0.444761	0.0100639	0.015975	["Fosb","Fosl2","Jun"]
GO:0032268	6	regulation of cellular protein metabolic process	26	2327	16.1712	0.0101153	0.015975	["Arid5a","Bcl6","Cebpa","Ctnnb1","Foxo1","Foxo3","Foxp3","Gfi1b","Irf1","Jdp2","Jun","Lef1","Mecom","Myb","Nfkb1","Nr1h2","Nr1h3","Nr2f2","Nr4a1","Pax6","Pax7","Rara","Rxra","Sox9","Trp53","Trp73"]
GO:0006359	8	regulation of transcription from RNA polymerase III promoter	2	22	0.152887	0.0101186	0.015975	["Cebpa","Foxa2"]
GO:0006783	5	heme biosynthetic process	2	22	0.152887	0.0101186	0.015975	["Hnf1a","Nfe2l1"]
GO:0010719	6	negative regulation of epithelial to mesenchymal transition	2	22	0.152887	0.0101186	0.015975	["Foxa2","Tbx5"]
GO:0030902	4	hindbrain development	2	22	0.152887	0.0101186	0.015975	["Hnf1b","Pax6"]
GO:0042104	10	positive regulation of activated T cell proliferation	2	22	0.152887	0.0101186	0.015975	["Stat5a","Stat5b"]
GO:0043011	6	myeloid dendritic cell differentiation	2	22	0.152887	0.0101186	0.015975	["Irf4","Relb"]
GO:0048821	6	erythrocyte development	2	22	0.152887	0.0101186	0.015975	["Bcl6","Sox6"]
GO:0061311	7	cell surface receptor signaling pathway involved in heart development	2	22	0.152887	0.0101186	0.015975	["Ctnnb1","Pou5f1"]
GO:0098751	5	bone cell development	2	22	0.152887	0.0101186	0.015975	["Foxp1","Meis1"]
GO:0032101	5	regulation of response to external stimulus	12	800	5.55952	0.0101608	0.0160289	["Bcl6","Foxa2","Foxp1","Foxp3","Irf3","Nfkb1","Nr1h3","Prdm1","Rela","Stat5a","Stat5b","Trp53"]
GO:0008637	5	apoptotic mitochondrial changes	3	65	0.451711	0.010498	0.0165478	["Jun","Trp53","Trp73"]
GO:0002429	5	immune response-activating cell surface receptor signaling pathway	6	265	1.84159	0.0106849	0.0168292	["Foxp3","Nfatc2","Nfkb1","Nfkb2","Rela","Relb"]
GO:0008219	4	cell death	13	906	6.29615	0.0107354	0.0168953	["Ctnnb1","Fosl2","Foxo1","Foxo3","Irf1","Irf3","Lef1","Mecom","Nfkb1","Nr4a1","Six1","Trp53","Trp73"]
GO:0071560	5	cellular response to transforming growth factor beta stimulus	3	66	0.45866	0.0109428	0.0171458	["Sox5","Sox6","Sox9"]
GO:0090596	4	sensory organ morphogenesis	3	66	0.45866	0.0109428	0.0171458	["Pax6","Rarg","Tbx2"]
GO:0002825	8	regulation of T-helper 1 type immune response	2	23	0.159836	0.0110321	0.0171458	["Hlx","Irf1"]
GO:0009081	5	branched-chain amino acid metabolic process	2	23	0.159836	0.0110321	0.0171458	["Stat5a","Stat5b"]
GO:0035066	8	positive regulation of histone acetylation	2	23	0.159836	0.0110321	0.0171458	["Arid5a","Foxp3"]
GO:0045453	7	bone resorption	2	23	0.159836	0.0110321	0.0171458	["Ctnnb1","Hnf1a"]
GO:0045671	9	negative regulation of osteoclast differentiation	2	23	0.159836	0.0110321	0.0171458	["Ctnnb1","Mafb"]
GO:0045736	7	negative regulation of cyclin-dependent protein serine/threonine kinase activity	2	23	0.159836	0.0110321	0.0171458	["Cebpa","Nr2f2"]
GO:0055026	8	negative regulation of cardiac muscle tissue development	2	23	0.159836	0.0110321	0.0171458	["Tbx5","Trp73"]
GO:0060009	4	Sertoli cell development	2	23	0.159836	0.0110321	0.0171458	["Sox8","Sox9"]
GO:0071634	6	regulation of transforming growth factor beta production	2	23	0.159836	0.0110321	0.0171458	["Foxp3","Gata6"]
GO:0072009	7	nephron epithelium development	2	23	0.159836	0.0110321	0.0171458	["Hnf1b","Pou3f3"]
GO:0090103	5	cochlea morphogenesis	2	23	0.159836	0.0110321	0.0171458	["Six1","Sox9"]
GO:0097150	5	neuronal stem cell maintenance	2	23	0.159836	0.0110321	0.0171458	["Foxo1","Foxo3"]
GO:1903578	8	regulation of ATP metabolic process	2	23	0.159836	0.0110321	0.0171458	["Stat3","Trp53"]
GO:1904030	9	negative regulation of cyclin-dependent protein kinase activity	2	23	0.159836	0.0110321	0.0171458	["Cebpa","Nr2f2"]
GO:0009617	4	response to bacterium	6	268	1.86244	0.0112486	0.0174686	["Cebpb","Irf3","Irf8","Mecom","Nfkb1","Rela"]
GO:0016265	3	death	13	914	6.35175	0.0114882	0.0178268	["Ctnnb1","Fosl2","Foxo1","Foxo3","Irf1","Irf3","Lef1","Mecom","Nfkb1","Nr4a1","Six1","Trp53","Trp73"]
GO:0007173	10	epidermal growth factor receptor signaling pathway	5	195	1.35513	0.0118149	0.0183195	["Foxo1","Foxo3","Foxo4","Nr4a1","Sox9"]
GO:0009314	4	response to radiation	9	530	3.68318	0.0119788	0.0184025	["Fos","Fosl2","Jun","Junb","Jund","Nfatc4","Rela","Trp53","Trp73"]
GO:0001502	3	cartilage condensation	2	24	0.166785	0.0119806	0.0184025	["Sox9","Uncx"]
GO:0002903	11	negative regulation of B cell apoptotic process	2	24	0.166785	0.0119806	0.0184025	["Bcl6","Foxp1"]
GO:0008347	5	glial cell migration	2	24	0.166785	0.0119806	0.0184025	["Foxg1","Nr2e1"]
GO:0010972	8	negative regulation of G2/M transition of mitotic cell cycle	2	24	0.166785	0.0119806	0.0184025	["Foxo4","Hmga2"]
GO:0032897	8	negative regulation of viral transcription	2	24	0.166785	0.0119806	0.0184025	["Hmga2","Jun"]
GO:0045954	7	positive regulation of natural killer cell mediated cytotoxicity	2	24	0.166785	0.0119806	0.0184025	["Stat5a","Stat5b"]
GO:0046426	8	negative regulation of JAK-STAT cascade	2	24	0.166785	0.0119806	0.0184025	["Hmga2","Irf1"]
GO:0048643	8	positive regulation of skeletal muscle tissue development	2	24	0.166785	0.0119806	0.0184025	["Shox2","Sox17"]
GO:0060334	7	regulation of interferon-gamma-mediated signaling pathway	2	24	0.166785	0.0119806	0.0184025	["Nr1h2","Nr1h3"]
GO:0098743	2	cell aggregation	2	24	0.166785	0.0119806	0.0184025	["Sox9","Uncx"]
GO:1900117	8	regulation of execution phase of apoptosis	2	24	0.166785	0.0119806	0.0184025	["Tbx5","Trp53"]
GO:0042542	5	response to hydrogen peroxide	4	127	0.882573	0.0119884	0.0184025	["Jun","Klf2","Rela","Stat6"]
GO:0001525	4	angiogenesis	6	273	1.89718	0.0122344	0.0187656	["Hoxb3","Jun","Lef1","Meis1","Rxra","Sox17"]
GO:0002449	5	lymphocyte mediated immunity	3	69	0.479508	0.0123419	0.018916	["Cebpg","Foxp3","Irf7"]
GO:0038127	9	ERBB signaling pathway	5	198	1.37598	0.0125546	0.0192125	["Foxo1","Foxo3","Foxo4","Nr4a1","Sox9"]
GO:0090287	5	regulation of cellular response to growth factor stimulus	5	198	1.37598	0.0125546	0.0192125	["Ctnnb1","Mecom","Sox11","Tcf7l2","Trp53"]
GO:0043331	5	response to dsRNA	3	70	0.486458	0.01283	0.0196189	["Irf1","Irf3","Nfkb1"]
GO:0002701	7	negative regulation of production of molecular mediator of immune response	2	25	0.173735	0.0129636	0.0196722	["Bcl6","Foxp3"]
GO:0002717	8	positive regulation of natural killer cell mediated immunity	2	25	0.173735	0.0129636	0.0196722	["Stat5a","Stat5b"]
GO:0003179	4	heart valve morphogenesis	2	25	0.173735	0.0129636	0.0196722	["Sox9","Tbx5"]
GO:0007622	3	rhythmic behavior	2	25	0.173735	0.0129636	0.0196722	["Egr2","Trp53"]
GO:0009648	6	photoperiodism	2	25	0.173735	0.0129636	0.0196722	["Fosl2","Trp53"]
GO:0045815	8	positive regulation of gene expression, epigenetic	2	25	0.173735	0.0129636	0.0196722	["Ctnnb1","Hmga1"]
GO:0060330	6	regulation of response to interferon-gamma	2	25	0.173735	0.0129636	0.0196722	["Nr1h2","Nr1h3"]
GO:1902253	8	regulation of intrinsic apoptotic signaling pathway by p53 class mediator	2	25	0.173735	0.0129636	0.0196722	["Trp53","Trp73"]
GO:1902750	8	negative regulation of cell cycle G2/M phase transition	2	25	0.173735	0.0129636	0.0196722	["Foxo4","Hmga2"]
GO:2000758	10	positive regulation of peptidyl-lysine acetylation	2	25	0.173735	0.0129636	0.0196722	["Arid5a","Foxp3"]
GO:1901987	7	regulation of cell cycle phase transition	6	277	1.92498	0.0130656	0.0198121	["Foxo4","Hmga2","Pbx1","Sox11","Trp53","Trp73"]
GO:0051270	5	regulation of cellular component movement	11	730	5.07306	0.0132155	0.0200242	["Bcl6","Foxp1","Lef1","Nr2e1","Nr2f2","Pax6","Sox9","Stat3","Stat5b","Tbx5","Trp53"]
GO:0065009	3	regulation of molecular function	29	2740	19.0413	0.0134395	0.020348	["Bcl6","Cebpa","Cebpg","Ctnnb1","Fos","Foxa2","Foxj1","Foxp3","Hmga2","Irf4","Jun","Lef1","Nfatc4","Nfkb1","Nfkb2","Nr1h2","Nr1h3","Nr2f2","Nr4a1","Pax7","Pbx1","Rara","Rela","Rxrb","Sox11","Tcf7l2","Trp53","Trp73","Zfp90"]
GO:0009411	6	response to UV	4	132	0.91732	0.0136504	0.0206517	["Nfatc4","Rela","Trp53","Trp73"]
GO:0006915	6	apoptotic process	12	834	5.79579	0.0137524	0.0207902	["Ctnnb1","Foxo1","Foxo3","Irf1","Irf3","Lef1","Mecom","Nfkb1","Nr4a1","Six1","Trp53","Trp73"]
GO:0030518	7	intracellular steroid hormone receptor signaling pathway	3	72	0.500356	0.013839	0.0208894	["Ctnnb1","Nr1i3","Rara"]
GO:0060395	6	SMAD protein signal transduction	3	72	0.500356	0.013839	0.0208894	["Fos","Hnf1a","Jun"]
GO:0001773	5	myeloid dendritic cell activation	2	26	0.180684	0.0139804	0.0210392	["Irf4","Relb"]
GO:0003279	4	cardiac septum development	2	26	0.180684	0.0139804	0.0210392	["Sall4","Tbx5"]
GO:0014003	6	oligodendrocyte development	2	26	0.180684	0.0139804	0.0210392	["Sox11","Tcf7l2"]
GO:0048762	7	mesenchymal cell differentiation	2	26	0.180684	0.0139804	0.0210392	["Foxc1","Hmga2"]
GO:0031399	7	regulation of protein modification process	19	1592	11.0634	0.0146738	0.0220661	["Arid5a","Bcl6","Cebpa","Ctnnb1","Foxo1","Foxp3","Gfi1b","Irf1","Jdp2","Jun","Mecom","Myb","Nr2f2","Pax6","Pax7","Rara","Sox9","Trp53","Trp73"]
GO:0002366	4	leukocyte activation involved in immune response	4	135	0.938168	0.0147145	0.0221106	["Foxp1","Lef1","Relb","Trp53"]
GO:0046889	7	positive regulation of lipid biosynthetic process	3	74	0.514255	0.0148919	0.0223603	["Nr1h2","Nr1h3","Tcf7l2"]
GO:0000060	5	protein import into nucleus, translocation	2	27	0.187634	0.0150307	0.0224672	["Bcl6","Trp53"]
GO:0021533	6	cell differentiation in hindbrain	2	27	0.187634	0.0150307	0.0224672	["Foxa2","Lhx5"]
GO:0031103	6	axon regeneration	2	27	0.187634	0.0150307	0.0224672	["Jun","Rxra"]
GO:0045880	7	positive regulation of smoothened signaling pathway	2	27	0.187634	0.0150307	0.0224672	["Foxa2","Shox2"]
GO:0048535	5	lymph node development	2	27	0.187634	0.0150307	0.0224672	["Nfkb1","Nfkb2"]
GO:2001222	7	regulation of neuron migration	2	27	0.187634	0.0150307	0.0224672	["Pax6","Stat3"]
GO:0002263	4	cell activation involved in immune response	4	136	0.945118	0.0150805	0.0225079	["Foxp1","Lef1","Relb","Trp53"]
GO:0009306	5	protein secretion	4	136	0.945118	0.0150805	0.0225079	["Foxp1","Hnf1a","Hnf1b","Pou2f2"]
GO:0070228	9	regulation of lymphocyte apoptotic process	3	75	0.521205	0.0154349	0.0230024	["Bcl6","Foxp1","Trp53"]
GO:0071559	4	response to transforming growth factor beta	3	75	0.521205	0.0154349	0.0230024	["Sox5","Sox6","Sox9"]
GO:0046782	7	regulation of viral transcription	3	76	0.528154	0.015989	0.0238103	["Hmga2","Jun","Lef1"]
GO:0032689	7	negative regulation of interferon-gamma production	2	28	0.194583	0.0161139	0.0239427	["Foxp3","Rara"]
GO:0035987	6	endodermal cell differentiation	2	28	0.194583	0.0161139	0.0239427	["Gata6","Hmga2"]
GO:0071371	6	cellular response to gonadotropin stimulus	2	28	0.194583	0.0161139	0.0239427	["Egr2","Gata6"]
GO:0055002	6	striated muscle cell development	3	77	0.535103	0.0165541	0.0245785	["Lef1","Nfatc2","Tbx3"]
GO:0001894	6	tissue homeostasis	4	140	0.972915	0.0166019	0.0246128	["Ctnnb1","Foxc1","Hnf1a","Sox9"]
GO:0048015	8	phosphatidylinositol-mediated signaling	4	140	0.972915	0.0166019	0.0246128	["Foxo1","Foxo3","Foxo4","Nr4a1"]
GO:0006779	6	porphyrin-containing compound biosynthetic process	2	29	0.201532	0.0172295	0.0255242	["Hnf1a","Nfe2l1"]
GO:0012501	5	programmed cell death	12	864	6.00428	0.017666	0.0261514	["Ctnnb1","Foxo1","Foxo3","Irf1","Irf3","Lef1","Mecom","Nfkb1","Nr4a1","Six1","Trp53","Trp73"]
GO:0048017	7	inositol lipid-mediated signaling	4	143	0.993763	0.0178039	0.026336	["Foxo1","Foxo3","Foxo4","Nr4a1"]
GO:0080135	5	regulation of cellular response to stress	9	568	3.94726	0.0180143	0.0266276	["Atf4","Bcl6","Cebpg","Foxo1","Hmga1","Hmga2","Mecom","Trp53","Trp73"]
GO:0046883	5	regulation of hormone secretion	6	298	2.07092	0.0180872	0.0267155	["Foxa2","Hmga2","Hnf1a","Pax6","Sox11","Tcf7l2"]
GO:0007179	9	transforming growth factor beta receptor signaling pathway	4	144	1.00071	0.0182163	0.0268846	["Fos","Jun","Junb","Trp53"]
GO:0001816	4	cytokine production	3	80	0.555952	0.0183163	0.0268846	["Foxp3","Irf7","Nfatc2"]
GO:0032941	4	secretion by tissue	3	80	0.555952	0.0183163	0.0268846	["Stat5a","Stat5b","Trp73"]
GO:0002832	6	negative regulation of response to biotic stimulus	2	30	0.208482	0.018377	0.0268846	["Irf3","Prdm1"]
GO:0019915	4	lipid storage	2	30	0.208482	0.018377	0.0268846	["Stat5a","Stat5b"]
GO:0033081	7	regulation of T cell differentiation in thymus	2	30	0.208482	0.018377	0.0268846	["Foxj1","Foxp3"]
GO:0040036	6	regulation of fibroblast growth factor receptor signaling pathway	2	30	0.208482	0.018377	0.0268846	["Ctnnb1","Tcf7l2"]
GO:0042149	6	cellular response to glucose starvation	2	30	0.208482	0.018377	0.0268846	["Atf4","Trp53"]
GO:0042832	5	defense response to protozoan	2	30	0.208482	0.018377	0.0268846	["Irf4","Irf8"]
GO:0071364	5	cellular response to epidermal growth factor stimulus	2	30	0.208482	0.018377	0.0268846	["Sox9","Stat5b"]
GO:0097300	6	programmed necrotic cell death	2	30	0.208482	0.018377	0.0268846	["Irf3","Trp53"]
GO:1901985	9	positive regulation of protein acetylation	2	30	0.208482	0.018377	0.0268846	["Arid5a","Foxp3"]
GO:2000398	6	regulation of thymocyte aggregation	2	30	0.208482	0.018377	0.0268846	["Foxj1","Foxp3"]
GO:0033273	5	response to vitamin	4	145	1.00766	0.0186346	0.0272215	["Cebpa","Rara","Rela","Rxra"]
GO:0051054	7	positive regulation of DNA metabolic process	4	145	1.00766	0.0186346	0.0272215	["Cebpg","Ctnnb1","Jun","Stat6"]
GO:0007169	8	transmembrane receptor protein tyrosine kinase signaling pathway	10	670	4.65609	0.0188753	0.027553	["Foxc1","Foxo1","Foxo3","Foxo4","Nfkb1","Nr1h3","Nr4a1","Rela","Sox9","Stat3"]
GO:0001570	6	vasculogenesis	3	81	0.562901	0.0189259	0.0275663	["Ctnnb1","Junb","Sox17"]
GO:0042102	9	positive regulation of T cell proliferation	3	81	0.562901	0.0189259	0.0275663	["Foxp3","Stat5a","Stat5b"]
GO:0045913	6	positive regulation of carbohydrate metabolic process	3	81	0.562901	0.0189259	0.0275663	["Foxo1","Nfkb1","Tcf7l2"]
GO:0046890	6	regulation of lipid biosynthetic process	4	147	1.02156	0.019489	0.0282568	["Nfkb1","Nr1h2","Nr1h3","Tcf7l2"]
GO:0001961	7	positive regulation of cytokine-mediated signaling pathway	2	31	0.215431	0.0195559	0.0282568	["Irf3","Irf7"]
GO:0015721	5	bile acid and bile salt transport	2	31	0.215431	0.0195559	0.0282568	["Hnf1a","Rxra"]
GO:0030325	5	adrenal gland development	2	31	0.215431	0.0195559	0.0282568	["Hmga2","Pbx1"]
GO:0042771	7	intrinsic apoptotic signaling pathway in response to DNA damage by p53 class mediator	2	31	0.215431	0.0195559	0.0282568	["Trp53","Trp73"]
GO:0048710	10	regulation of astrocyte differentiation	2	31	0.215431	0.0195559	0.0282568	["Hmga2","Nr2e1"]
GO:0060412	5	ventricular septum morphogenesis	2	31	0.215431	0.0195559	0.0282568	["Sox11","Tbx3"]
GO:0060706	4	cell differentiation involved in embryonic placenta development	2	31	0.215431	0.0195559	0.0282568	["Nr2f2","Prdm1"]
GO:0061564	6	axon development	2	31	0.215431	0.0195559	0.0282568	["Jun","Rxra"]
GO:0070265	5	necrotic cell death	2	31	0.215431	0.0195559	0.0282568	["Irf3","Trp53"]
GO:2000677	6	regulation of transcription regulatory region DNA binding	2	31	0.215431	0.0195559	0.0282568	["Hmga2","Sox11"]
GO:0008630	6	intrinsic apoptotic signaling pathway in response to DNA damage	3	83	0.5768	0.0201787	0.0291146	["Nfatc4","Trp53","Trp73"]
GO:0048640	6	negative regulation of developmental growth	3	83	0.5768	0.0201787	0.0291146	["Tbx5","Tcf7l2","Trp73"]
GO:0002902	10	regulation of B cell apoptotic process	2	32	0.222381	0.0207657	0.0297677	["Bcl6","Foxp1"]
GO:0007548	4	sex differentiation	2	32	0.222381	0.0207657	0.0297677	["Pbx1","Stat5b"]
GO:0010718	6	positive regulation of epithelial to mesenchymal transition	2	32	0.222381	0.0207657	0.0297677	["Ctnnb1","Lef1"]
GO:0033014	6	tetrapyrrole biosynthetic process	2	32	0.222381	0.0207657	0.0297677	["Hnf1a","Nfe2l1"]
GO:0033032	8	regulation of myeloid cell apoptotic process	2	32	0.222381	0.0207657	0.0297677	["Irf7","Stat5a"]
GO:0042116	5	macrophage activation	2	32	0.222381	0.0207657	0.0297677	["Foxp1","Jun"]
GO:0046902	5	regulation of mitochondrial membrane permeability	2	32	0.222381	0.0207657	0.0297677	["Stat3","Trp53"]
GO:0060674	4	placenta blood vessel development	2	32	0.222381	0.0207657	0.0297677	["Junb","Nr2f2"]
GO:0060760	6	positive regulation of response to cytokine stimulus	2	32	0.222381	0.0207657	0.0297677	["Irf3","Irf7"]
GO:0051897	8	positive regulation of protein kinase B signaling	3	84	0.583749	0.0208219	0.0298267	["Pou5f1","Rara","Tcf7l2"]
GO:0051272	6	positive regulation of cellular component movement	7	398	2.76586	0.0214999	0.0307759	["Bcl6","Foxp1","Lef1","Pax6","Sox9","Stat5b","Trp53"]
GO:0010559	7	regulation of glycoprotein biosynthetic process	2	33	0.22933	0.022006	0.0314101	["Ctnnb1","Tcf7l2"]
GO:0010831	9	positive regulation of myotube differentiation	2	33	0.22933	0.022006	0.0314101	["Nfatc2","Shox2"]
GO:0033144	7	negative regulation of intracellular steroid hormone receptor signaling pathway	2	33	0.22933	0.022006	0.0314101	["Foxp1","Hmga2"]
GO:0044344	5	cellular response to fibroblast growth factor stimulus	2	33	0.22933	0.022006	0.0314101	["Nr4a1","Pax6"]
GO:0045765	6	regulation of angiogenesis	5	229	1.59141	0.0220943	0.0315137	["Ctnnb1","Foxc1","Foxo4","Gata6","Nr2e1"]
GO:0006606	5	protein import into nucleus	3	86	0.597648	0.0221417	0.0315361	["Jun","Stat3","Tcf7l2"]
GO:1902593	5	single-organism nuclear import	3	86	0.597648	0.0221417	0.0315361	["Jun","Stat3","Tcf7l2"]
GO:0048167	4	regulation of synaptic plasticity	4	153	1.06326	0.022196	0.0315909	["Egr2","Nfatc4","Nr2e1","Rara"]
GO:0046879	2	hormone secretion	3	87	0.604597	0.0228184	0.0324536	["Hnf1a","Hnf1b","Tbx3"]
GO:0007417	5	central nervous system development	4	155	1.07716	0.0231468	0.0328972	["Pax6","Pou3f3","Sox9","Trp53"]
GO:0001562	4	response to protozoan	2	34	0.236279	0.0232762	0.0329403	["Irf4","Irf8"]
GO:0006101	8	citrate metabolic process	2	34	0.236279	0.0232762	0.0329403	["Stat5a","Stat5b"]
GO:0006984	6	ER-nucleus signaling pathway	2	34	0.236279	0.0232762	0.0329403	["Atf4","Trp53"]
GO:0010165	6	response to X-ray	2	34	0.236279	0.0232762	0.0329403	["Trp53","Trp73"]
GO:0035902	4	response to immobilization stress	2	34	0.236279	0.0232762	0.0329403	["Fos","Fosl2"]
GO:0042168	4	heme metabolic process	2	34	0.236279	0.0232762	0.0329403	["Hnf1a","Nfe2l1"]
GO:0051129	5	negative regulation of cellular component organization	9	595	4.13489	0.0234822	0.0332081	["Foxa2","Foxp3","Gfi1b","Hmga1","Nfatc4","Nr1h2","Nr1h3","Tbx5","Trp53"]
GO:0071356	7	cellular response to tumor necrosis factor	3	88	0.611547	0.0235063	0.0332187	["Irf1","Klf2","Rela"]
GO:0071158	7	positive regulation of cell cycle arrest	3	89	0.618496	0.0242054	0.0341824	["Gata6","Hmga2","Trp53"]
GO:0051091	5	positive regulation of sequence-specific DNA binding transcription factor activity	5	235	1.63311	0.0243656	0.0343843	["Cebpg","Hmga2","Nfkb1","Nfkb2","Rela"]
GO:0001659	5	temperature homeostasis	2	35	0.243229	0.024576	0.0344617	["Foxo1","Stat3"]
GO:0002639	8	positive regulation of immunoglobulin production	2	35	0.243229	0.024576	0.0344617	["Foxp1","Stat6"]
GO:0006360	7	transcription from RNA polymerase I promoter	2	35	0.243229	0.024576	0.0344617	["Cebpa","Tbp"]
GO:0031057	7	negative regulation of histone modification	2	35	0.243229	0.024576	0.0344617	["Foxp3","Gfi1b"]
GO:0031572	7	G2 DNA damage checkpoint	2	35	0.243229	0.024576	0.0344617	["Foxo4","Hmga2"]
GO:0050873	7	brown fat cell differentiation	2	35	0.243229	0.024576	0.0344617	["Cebpa","Cebpb"]
GO:0060338	7	regulation of type I interferon-mediated signaling pathway	2	35	0.243229	0.024576	0.0344617	["Irf3","Irf7"]
GO:0060349	4	bone morphogenesis	2	35	0.243229	0.024576	0.0344617	["Rarg","Sox9"]
GO:0097028	7	dendritic cell differentiation	2	35	0.243229	0.024576	0.0344617	["Irf4","Relb"]
GO:0043254	5	regulation of protein complex assembly	6	320	2.22381	0.0246249	0.034506	["Ctnnb1","Hnf1a","Hnf1b","Irf8","Jun","Trp53"]
GO:0001843	6	neural tube closure	3	90	0.625445	0.0249156	0.0348155	["Rara","Rarg","Sall4"]
GO:0002443	4	leukocyte mediated immunity	3	90	0.625445	0.0249156	0.0348155	["Cebpg","Foxp3","Irf7"]
GO:0050852	7	T cell receptor signaling pathway	3	90	0.625445	0.0249156	0.0348155	["Foxp3","Nfkb1","Rela"]
GO:0051170	8	nuclear import	3	90	0.625445	0.0249156	0.0348155	["Jun","Stat3","Tcf7l2"]
GO:0010632	5	regulation of epithelial cell migration	4	160	1.1119	0.0256312	0.0357234	["Foxp1","Nr2e1","Nr2f2","Sox9"]
GO:0006333	5	chromatin assembly or disassembly	3	91	0.632395	0.025637	0.0357234	["Hmga1","Hmga2","Trp53"]
GO:0030330	7	DNA damage response, signal transduction by p53 class mediator	3	91	0.632395	0.025637	0.0357234	["Foxo3","Trp53","Trp73"]
GO:0060606	5	tube closure	3	91	0.632395	0.025637	0.0357234	["Rara","Rarg","Sall4"]
GO:0006110	7	regulation of glycolytic process	2	36	0.250178	0.0259048	0.0359709	["Stat3","Trp53"]
GO:0033189	6	response to vitamin A	2	36	0.250178	0.0259048	0.0359709	["Rara","Rxra"]
GO:0033619	6	membrane protein proteolysis	2	36	0.250178	0.0259048	0.0359709	["Nfkb1","Rela"]
GO:0046329	9	negative regulation of JNK cascade	2	36	0.250178	0.0259048	0.0359709	["Mecom","Trp73"]
GO:0090559	4	regulation of membrane permeability	2	36	0.250178	0.0259048	0.0359709	["Stat3","Trp53"]
GO:2000377	6	regulation of reactive oxygen species metabolic process	4	161	1.11885	0.0261465	0.0362813	["Foxo1","Foxo3","Stat3","Trp53"]
GO:0032270	7	positive regulation of cellular protein metabolic process	16	1355	9.41643	0.0266061	0.0368933	["Arid5a","Bcl6","Cebpa","Ctnnb1","Foxp3","Gfi1b","Jdp2","Myb","Nr1h2","Nr1h3","Pax7","Rara","Rxra","Sox9","Trp53","Trp73"]
GO:0090276	6	regulation of peptide hormone secretion	5	241	1.6748	0.0267824	0.0371119	["Foxa2","Hmga2","Hnf1a","Pax6","Tcf7l2"]
GO:0007589	5	body fluid secretion	3	93	0.646294	0.0271133	0.037516	["Stat5a","Stat5b","Trp73"]
GO:0008543	9	fibroblast growth factor receptor signaling pathway	4	163	1.13275	0.0271959	0.037516	["Foxo1","Foxo3","Foxo4","Nr4a1"]
GO:0001960	7	negative regulation of cytokine-mediated signaling pathway	2	37	0.257128	0.0272621	0.037516	["Nr1h2","Nr1h3"]
GO:0002715	7	regulation of natural killer cell mediated immunity	2	37	0.257128	0.0272621	0.037516	["Stat5a","Stat5b"]
GO:0031102	5	neuron projection regeneration	2	37	0.257128	0.0272621	0.037516	["Jun","Rxra"]
GO:0035088	6	establishment or maintenance of apical/basal cell polarity	2	37	0.257128	0.0272621	0.037516	["Cdx2","Foxj1"]
GO:0042269	6	regulation of natural killer cell mediated cytotoxicity	2	37	0.257128	0.0272621	0.037516	["Stat5a","Stat5b"]
GO:0042304	7	regulation of fatty acid biosynthetic process	2	37	0.257128	0.0272621	0.037516	["Nr1h2","Nr1h3"]
GO:0045923	7	positive regulation of fatty acid metabolic process	2	37	0.257128	0.0272621	0.037516	["Nr1h2","Nr1h3"]
GO:0061245	5	establishment or maintenance of bipolar cell polarity	2	37	0.257128	0.0272621	0.037516	["Cdx2","Foxj1"]
GO:0007610	2	behavior	9	612	4.25303	0.0274824	0.037793	["Egr2","Fos","Fosl2","Foxa2","Jun","Meis1","Nr2e1","Stat3","Trp53"]
GO:0043255	6	regulation of carbohydrate biosynthetic process	3	94	0.653243	0.0278682	0.0382972	["Foxo1","Nfkb1","Tcf7l2"]
GO:0048666	5	neuron development	4	165	1.14665	0.0282702	0.0388229	["Foxg1","Pax6","Prdm1","Trp73"]
GO:0044058	6	regulation of digestive system process	2	38	0.264077	0.0286476	0.0392871	["Nr1h2","Nr1h3"]
GO:1903018	6	regulation of glycoprotein metabolic process	2	38	0.264077	0.0286476	0.0392871	["Ctnnb1","Tcf7l2"]
GO:0002791	7	regulation of peptide secretion	5	247	1.7165	0.0293472	0.0401912	["Foxa2","Hmga2","Hnf1a","Pax6","Tcf7l2"]
GO:1901342	6	regulation of vasculature development	5	247	1.7165	0.0293472	0.0401912	["Ctnnb1","Foxc1","Foxo4","Gata6","Nr2e1"]
GO:0007492	5	endoderm development	2	39	0.271026	0.0300608	0.0410275	["Hnf1b","Sox17"]
GO:0045824	7	negative regulation of innate immune response	2	39	0.271026	0.0300608	0.0410275	["Nr1h2","Nr1h3"]
GO:0070849	4	response to epidermal growth factor	2	39	0.271026	0.0300608	0.0410275	["Sox9","Stat5b"]
GO:0071774	4	response to fibroblast growth factor	2	39	0.271026	0.0300608	0.0410275	["Nr4a1","Pax6"]
GO:0072350	7	tricarboxylic acid metabolic process	2	39	0.271026	0.0300608	0.0410275	["Stat5a","Stat5b"]
GO:0032879	4	regulation of localization	25	2436	16.9287	0.030106	0.0410612	["Atf4","Bcl6","Ctnnb1","Foxa2","Foxp1","Foxp3","Hmga2","Hnf1a","Irf3","Lef1","Nfkb1","Nr1h2","Nr1h3","Nr2e1","Nr2f2","Pax6","Pou5f1","Six1","Sox11","Sox9","Stat3","Stat5b","Tbx5","Tcf7l2","Trp53"]
GO:0051153	7	regulation of striated muscle cell differentiation	3	97	0.674091	0.0301996	0.0411606	["Foxp1","Nfatc2","Shox2"]
GO:0040029	7	regulation of gene expression, epigenetic	5	249	1.7304	0.0302355	0.0411814	["Ctnnb1","Fos","Hmga1","Klf2","Tbp"]
GO:0010948	6	negative regulation of cell cycle process	5	250	1.73735	0.0306859	0.0417664	["Foxo4","Hmga2","Sox11","Trp53","Trp73"]
GO:0009914	4	hormone transport	3	98	0.681041	0.0309989	0.0421348	["Hnf1a","Hnf1b","Tbx3"]
[truncated: 78 more rows]

## Sheet: MyD88 Privative
ID	Level	Title	Number of hits	Group size	Expected hits	P-value	Adjusted P-value	Hit names
[truncated: 553 more rows]
