# Supplementary material for: Macrophage mediated recognition and clearance of Borrelia burgdorferi elicits MyD88-dependent and -independent phagosomal signals that contribute to phagocytosis and inflammation
Source: BMC Immunol. 2021 May 17;22:32. doi: 10.1186/s12865-021-00418-8 (PMC8127205; doi:10.1186/s12865-021-00418-8)
Supplement: Supplementary file 3 — Additional file 3: Supplemental File 3. Gene ontology analysis of identified master regulators. [file 12865_2021_418_MOESM3_ESM.xlsx]

## Sheet: MyD88 Dependent
ID	Level	Title	Number of hits	Group size	Expected hits	P-value	Adjusted P-value	Hit names
GO:0048522	5	positive regulation of cellular process	27	4765	7.00486	1.78535e-13	1.38008e-10	["Bcar3","Cd14","Cep131","Ctss","Cxcl1","Etv6","Fas","Id3","Ikbke","Il6","Il7","Irak2","Irf8","Ly96","Med14","Myd88","Ncoa3","Ncor2","Nr3c1","Prdm1","Psen2","Smarcc1","Stat1","Suco","Tcf3","Trps1","Vac14"]
GO:0048518	4	positive regulation of biological process	28	5484	8.06183	4.29835e-13	1.66131e-10	["Bcar3","Cd14","Cep131","Ctss","Cxcl1","Etv6","Fas","Id3","Ifih1","Ikbke","Il6","Il7","Irak2","Irf8","Ly96","Med14","Myd88","Ncoa3","Ncor2","Nr3c1","Prdm1","Psen2","Smarcc1","Stat1","Suco","Tcf3","Trps1","Vac14"]
GO:0051239	4	regulation of multicellular organismal process	21	2641	3.88244	2.43488e-12	6.27388e-10	["Cd14","Ctss","Cxcl1","Fas","Id3","Ifih1","Ikbke","Il6","Il7","Irf8","Myd88","Ncoa3","Nr3c1","Pdlim5","Prdm1","Psen2","Stat1","Suco","Tcf3","Trps1","Uba7"]
GO:0002684	5	positive regulation of immune system process	13	873	1.28337	1.18668e-10	2.29325e-08	["Cd14","Ctss","Cxcl1","Ifih1","Ikbke","Il6","Il7","Irak2","Ly96","Myd88","Prdm1","Psen2","Tcf3"]
GO:0002682	4	regulation of immune system process	15	1428	2.09925	3.66584e-10	5.66739e-08	["Cd14","Ctss","Cxcl1","Fas","Ifih1","Ikbke","Il6","Il7","Irak2","Ly96","Myd88","Prdm1","Psen2","Stat1","Tcf3"]
GO:0002376	2	immune system process	16	1780	2.61671	7.26595e-10	8.8732e-08	["Cd14","Ctss","Cxcl1","Fas","Ifih1","Ikbke","Il6","Il7","Irak2","Irf8","Ly96","Myd88","Psen2","Stat1","Tcf3","Uba7"]
GO:0010604	6	positive regulation of macromolecule metabolic process	19	2782	4.08972	8.03524e-10	8.8732e-08	["Bcar3","Cd14","Etv6","Fas","Il6","Irak2","Irf8","Ly96","Med14","Myd88","Ncoa3","Ncor2","Nr3c1","Prdm1","Psen2","Smarcc1","Stat1","Suco","Tcf3"]
GO:0009893	5	positive regulation of metabolic process	21	3604	5.29811	9.68134e-10	9.35459e-08	["Bcar3","Cd14","Cxcl1","Etv6","Fas","Il6","Irak2","Irf8","Ly96","Med14","Myd88","Ncoa3","Ncor2","Nr3c1","Prdm1","Psen2","Smarcc1","Stat1","Suco","Tcf3","Vac14"]
GO:0002221	6	pattern recognition receptor signaling pathway	7	149	0.21904	1.82108e-09	1.56411e-07	["Cd14","Ctss","Ifih1","Ikbke","Irak2","Ly96","Myd88"]
GO:0031325	6	positive regulation of cellular metabolic process	19	2954	4.34257	2.24626e-09	1.73636e-07	["Bcar3","Cd14","Cxcl1","Etv6","Fas","Il6","Irak2","Irf8","Ly96","Med14","Myd88","Ncoa3","Ncor2","Nr3c1","Psen2","Smarcc1","Stat1","Tcf3","Vac14"]
GO:0006955	3	immune response	13	1136	1.66999	2.96441e-09	1.99527e-07	["Cd14","Ctss","Cxcl1","Fas","Ifih1","Ikbke","Il6","Il7","Irak2","Irf8","Ly96","Myd88","Uba7"]
GO:0019221	7	cytokine-mediated signaling pathway	9	386	0.567445	3.20775e-09	1.99527e-07	["Cxcl1","Fas","Il6","Irak2","Irf8","Kpna3","Myd88","Stat1","Uba7"]
GO:0031349	6	positive regulation of defense response	9	388	0.570385	3.35557e-09	1.99527e-07	["Cd14","Ctss","Cxcl1","Ifih1","Ikbke","Il6","Irak2","Ly96","Myd88"]
GO:0032496	5	response to lipopolysaccharide	9	405	0.595376	4.87413e-09	2.69122e-07	["Cd14","Cxcl1","Fas","Il6","Irf8","Ly96","Myd88","Stat1","Tcf3"]
GO:0002237	5	response to molecule of bacterial origin	9	421	0.618897	6.82423e-09	3.51675e-07	["Cd14","Cxcl1","Fas","Il6","Irf8","Ly96","Myd88","Stat1","Tcf3"]
GO:0042981	7	regulation of apoptotic process	14	1540	2.2639	1.14328e-08	5.52348e-07	["Cd14","Fas","Id3","Ifih1","Il6","Il7","Irak2","Ly96","Myd88","Ncoa3","Nr3c1","Psen2","Stat1","Trps1"]
GO:0043067	6	regulation of programmed cell death	14	1556	2.28742	1.30446e-08	5.93145e-07	["Cd14","Fas","Id3","Ifih1","Il6","Il7","Irak2","Ly96","Myd88","Ncoa3","Nr3c1","Psen2","Stat1","Trps1"]
GO:0048519	4	negative regulation of biological process	22	4697	6.90489	1.83773e-08	7.89204e-07	["Cxcl1","Etv6","Fas","Id3","Ifih1","Ikbke","Il6","Il7","Irak2","Irf8","Med14","Myd88","Ncoa3","Ncor2","Nr3c1","Prdm1","Psen2","Smarcc1","Stat1","Tcf3","Trps1","Uba7"]
GO:0033993	5	response to lipid	12	1094	1.60825	2.31634e-08	9.42384e-07	["Cd14","Cxcl1","Fas","Il6","Irf8","Ly96","Myd88","Ncoa3","Ncor2","Nr3c1","Stat1","Tcf3"]
GO:0002224	7	toll-like receptor signaling pathway	6	126	0.185228	2.71345e-08	1.04875e-06	["Cd14","Ctss","Ikbke","Irak2","Ly96","Myd88"]
GO:0050794	4	regulation of cellular process	31	10916	16.0472	2.84972e-08	1.04897e-06	["Bcar3","Cd14","Cep131","Ctss","Cxcl1","Etv6","Fas","Id3","Ifih1","Ikbke","Il6","Il7","Irak2","Irf8","Kpna3","Ly96","Med14","Myd88","Ncoa3","Ncor2","Nr3c1","Pdlim5","Prdm1","Psen2","Smarcc1","Stat1","Suco","Tcf3","Trps1","Uba7","Vac14"]
GO:0010941	5	regulation of cell death	14	1662	2.44325	3.01317e-08	1.05872e-06	["Cd14","Fas","Id3","Ifih1","Il6","Il7","Irak2","Ly96","Myd88","Ncoa3","Nr3c1","Psen2","Stat1","Trps1"]
GO:0032502	2	developmental process	23	5346	7.85896	3.16453e-08	1.06356e-06	["Bcar3","Cep131","Ctss","Cxcl1","Etv6","Fas","Id3","Il6","Il7","Irf8","Med14","Myd88","Ncoa3","Ncor2","Nr3c1","Pdlim5","Prdm1","Psen2","Smarcc1","Stat1","Suco","Tcf3","Trps1"]
GO:0045595	5	regulation of cell differentiation	14	1691	2.48588	3.74959e-08	1.19203e-06	["Fas","Id3","Il6","Il7","Med14","Ncoa3","Ncor2","Nr3c1","Pdlim5","Prdm1","Stat1","Suco","Tcf3","Trps1"]
GO:0045088	6	regulation of innate immune response	8	360	0.529223	3.9614e-08	1.19203e-06	["Cd14","Ctss","Ifih1","Ikbke","Irak2","Ly96","Myd88","Stat1"]
GO:0044093	4	positive regulation of molecular function	14	1700	2.49911	4.00942e-08	1.19203e-06	["Bcar3","Cd14","Ctss","Cxcl1","Fas","Il6","Irak2","Ly96","Myd88","Ncoa3","Psen2","Stat1","Tcf3","Vac14"]
GO:0002758	5	innate immune response-activating signal transduction	7	240	0.352815	4.93192e-08	1.41199e-06	["Cd14","Ctss","Ifih1","Ikbke","Irak2","Ly96","Myd88"]
GO:0044767	3	single-organism developmental process	22	4956	7.28564	5.15572e-08	1.42335e-06	["Bcar3","Cep131","Ctss","Etv6","Fas","Id3","Il6","Il7","Irf8","Med14","Myd88","Ncoa3","Ncor2","Nr3c1","Pdlim5","Prdm1","Psen2","Smarcc1","Stat1","Suco","Tcf3","Trps1"]
GO:0002218	4	activation of innate immune response	7	245	0.360166	5.67904e-08	1.51376e-06	["Cd14","Ctss","Ifih1","Ikbke","Irak2","Ly96","Myd88"]
GO:0002757	4	immune response-activating signal transduction	8	380	0.558624	6.00909e-08	1.54834e-06	["Cd14","Ctss","Ifih1","Ikbke","Irak2","Ly96","Myd88","Psen2"]
GO:0031347	6	regulation of defense response	10	757	1.11284	8.21023e-08	2.04623e-06	["Cd14","Ctss","Cxcl1","Ifih1","Ikbke","Il6","Irak2","Ly96","Myd88","Stat1"]
GO:0051240	5	positive regulation of multicellular organismal process	13	1505	2.21245	8.47082e-08	2.04623e-06	["Cd14","Cxcl1","Ifih1","Il6","Il7","Irf8","Myd88","Ncoa3","Nr3c1","Prdm1","Psen2","Suco","Tcf3"]
GO:0050778	6	positive regulation of immune response	9	568	0.834996	8.95314e-08	2.07728e-06	["Cd14","Ctss","Ifih1","Ikbke","Il6","Irak2","Ly96","Myd88","Psen2"]
GO:0007165	5	signal transduction	23	5637	8.28675	9.13681e-08	2.07728e-06	["Bcar3","Cd14","Ctss","Cxcl1","Fas","Ifih1","Ikbke","Il6","Irak2","Irf8","Kpna3","Ly96","Med14","Myd88","Ncoa3","Ncor2","Nr3c1","Psen2","Smarcc1","Stat1","Trps1","Uba7","Vac14"]
GO:0006357	8	regulation of transcription from RNA polymerase II promoter	14	1822	2.67846	9.57606e-08	2.11494e-06	["Etv6","Id3","Il6","Irf8","Med14","Ncoa3","Ncor2","Nr3c1","Prdm1","Psen2","Smarcc1","Stat1","Tcf3","Trps1"]
GO:0050789	3	regulation of biological process	31	11418	16.7852	1.05845e-07	2.27273e-06	["Bcar3","Cd14","Cep131","Ctss","Cxcl1","Etv6","Fas","Id3","Ifih1","Ikbke","Il6","Il7","Irak2","Irf8","Kpna3","Ly96","Med14","Myd88","Ncoa3","Ncor2","Nr3c1","Pdlim5","Prdm1","Psen2","Smarcc1","Stat1","Suco","Tcf3","Trps1","Uba7","Vac14"]
GO:0048584	5	positive regulation of response to stimulus	14	1860	2.73432	1.23914e-07	2.5888e-06	["Cd14","Ctss","Cxcl1","Fas","Ifih1","Ikbke","Il6","Irak2","Ly96","Myd88","Ncoa3","Nr3c1","Psen2","Trps1"]
GO:0044699	2	single-organism process	32	12631	18.5684	1.50439e-07	2.96881e-06	["Acot7","Bcar3","Cd14","Cep131","Ctss","Cxcl1","Etv6","Fas","Id3","Ikbke","Il6","Il7","Irak2","Irf8","Kpna3","Ly96","Med14","Myd88","Ncoa3","Ncor2","Nr3c1","Pdlim5","Prdm1","Psen2","Rars","Smarcc1","Stat1","Suco","Tcf3","Trps1","Uba7","Vac14"]
GO:0002253	3	activation of immune response	8	429	0.630658	1.5226e-07	2.96881e-06	["Cd14","Ctss","Ifih1","Ikbke","Irak2","Ly96","Myd88","Psen2"]
GO:0031663	7	lipopolysaccharide-mediated signaling pathway	4	33	0.0485121	1.53626e-07	2.96881e-06	["Irak2","Ly96","Myd88","Stat1"]
GO:0045089	7	positive regulation of innate immune response	7	289	0.424849	1.74848e-07	3.29653e-06	["Cd14","Ctss","Ifih1","Ikbke","Irak2","Ly96","Myd88"]
GO:0050776	5	regulation of immune response	10	825	1.2128	1.8274e-07	3.36329e-06	["Cd14","Ctss","Ifih1","Ikbke","Il6","Irak2","Ly96","Myd88","Psen2","Stat1"]
GO:0006952	4	defense response	12	1336	1.96401	2.07079e-07	3.7226e-06	["Cd14","Ctss","Cxcl1","Ifih1","Ikbke","Il6","Irak2","Irf8","Ly96","Myd88","Stat1","Uba7"]
GO:0043207	4	response to external biotic stimulus	10	842	1.23779	2.20712e-07	3.87751e-06	["Cd14","Cxcl1","Fas","Ifih1","Il6","Irf8","Ly96","Myd88","Stat1","Tcf3"]
GO:0043065	8	positive regulation of apoptotic process	9	634	0.932021	2.27212e-07	3.87762e-06	["Cd14","Fas","Id3","Il6","Ly96","Nr3c1","Psen2","Stat1","Trps1"]
GO:0019222	4	regulation of metabolic process	24	6481	9.52749	2.30751e-07	3.87762e-06	["Bcar3","Cd14","Cxcl1","Etv6","Fas","Id3","Il6","Il7","Irak2","Irf8","Ly96","Med14","Myd88","Ncoa3","Ncor2","Nr3c1","Prdm1","Psen2","Smarcc1","Stat1","Suco","Tcf3","Trps1","Vac14"]
GO:0043068	7	positive regulation of programmed cell death	9	640	0.940841	2.45993e-07	4.0458e-06	["Cd14","Fas","Id3","Il6","Ly96","Nr3c1","Psen2","Stat1","Trps1"]
GO:0060255	5	regulation of macromolecule metabolic process	22	5423	7.97216	2.83954e-07	4.57284e-06	["Bcar3","Cd14","Etv6","Fas","Id3","Il6","Il7","Irak2","Irf8","Ly96","Med14","Myd88","Ncoa3","Ncor2","Nr3c1","Prdm1","Psen2","Smarcc1","Stat1","Suco","Tcf3","Trps1"]
GO:0009607	3	response to biotic stimulus	10	872	1.2819	3.04919e-07	4.81026e-06	["Cd14","Cxcl1","Fas","Ifih1","Il6","Irf8","Ly96","Myd88","Stat1","Tcf3"]
GO:0002764	6	immune response-regulating signaling pathway	8	474	0.69681	3.25296e-07	5.02907e-06	["Cd14","Ctss","Ifih1","Ikbke","Irak2","Ly96","Myd88","Psen2"]
GO:0034142	8	toll-like receptor 4 signaling pathway	5	100	0.147006	3.4091e-07	5.0997e-06	["Cd14","Ikbke","Irak2","Ly96","Myd88"]
GO:0065009	3	regulation of molecular function	16	2740	4.02798	3.48908e-07	5.0997e-06	["Bcar3","Cd14","Ctss","Cxcl1","Fas","Id3","Il6","Il7","Irak2","Ly96","Myd88","Ncoa3","Psen2","Stat1","Tcf3","Vac14"]
GO:0065007	2	biological regulation	31	11898	17.4908	3.49656e-07	5.0997e-06	["Bcar3","Cd14","Cep131","Ctss","Cxcl1","Etv6","Fas","Id3","Ifih1","Ikbke","Il6","Il7","Irak2","Irf8","Kpna3","Ly96","Med14","Myd88","Ncoa3","Ncor2","Nr3c1","Pdlim5","Prdm1","Psen2","Smarcc1","Stat1","Suco","Tcf3","Trps1","Uba7","Vac14"]
GO:0050793	4	regulation of developmental process	15	2374	3.48993	3.58785e-07	5.13594e-06	["Cxcl1","Fas","Id3","Il6","Il7","Med14","Ncoa3","Ncor2","Nr3c1","Pdlim5","Prdm1","Stat1","Suco","Tcf3","Trps1"]
GO:0010942	6	positive regulation of cell death	9	676	0.993763	3.89744e-07	5.47767e-06	["Cd14","Fas","Id3","Il6","Ly96","Nr3c1","Psen2","Stat1","Trps1"]
GO:0031323	5	regulation of cellular metabolic process	22	5591	8.21913	5.02318e-07	6.93379e-06	["Bcar3","Cd14","Cxcl1","Etv6","Fas","Id3","Il6","Irak2","Irf8","Ly96","Med14","Myd88","Ncoa3","Ncor2","Nr3c1","Prdm1","Psen2","Smarcc1","Stat1","Tcf3","Trps1","Vac14"]
GO:0050864	7	regulation of B cell activation	5	114	0.167587	6.55123e-07	8.88438e-06	["Fas","Il6","Il7","Prdm1","Tcf3"]
GO:0048523	5	negative regulation of cellular process	19	4294	6.31246	1.10024e-06	1.46636e-05	["Cxcl1","Etv6","Fas","Id3","Il6","Il7","Irak2","Irf8","Med14","Myd88","Ncoa3","Ncor2","Nr3c1","Prdm1","Psen2","Smarcc1","Stat1","Tcf3","Trps1"]
GO:0000122	9	negative regulation of transcription from RNA polymerase II promoter	9	773	1.13636	1.19218e-06	1.56195e-05	["Etv6","Id3","Irf8","Ncor2","Prdm1","Psen2","Stat1","Tcf3","Trps1"]
GO:0080090	5	regulation of primary metabolic process	21	5345	7.85749	1.30362e-06	1.6795e-05	["Bcar3","Cd14","Etv6","Fas","Id3","Il6","Irak2","Irf8","Ly96","Med14","Myd88","Ncoa3","Ncor2","Nr3c1","Prdm1","Psen2","Smarcc1","Stat1","Tcf3","Trps1","Vac14"]
GO:0048583	4	regulation of response to stimulus	17	3494	5.1364	1.67501e-06	2.12259e-05	["Cd14","Ctss","Cxcl1","Fas","Ifih1","Ikbke","Il6","Il7","Irak2","Ly96","Myd88","Ncoa3","Nr3c1","Prdm1","Psen2","Stat1","Trps1"]
GO:0010468	6	regulation of gene expression	18	3959	5.81998	1.80454e-06	2.24986e-05	["Etv6","Fas","Id3","Il6","Il7","Irak2","Irf8","Med14","Myd88","Ncoa3","Ncor2","Nr3c1","Prdm1","Psen2","Smarcc1","Stat1","Tcf3","Trps1"]
GO:0016485	6	protein processing	6	258	0.379277	1.85662e-06	2.27804e-05	["Cd14","Ctss","Fas","Ly96","Psen2","Stat1"]
GO:0009967	6	positive regulation of signal transduction	11	1353	1.989	2.0651e-06	2.49425e-05	["Cd14","Fas","Ikbke","Il6","Irak2","Ly96","Myd88","Ncoa3","Nr3c1","Psen2","Trps1"]
GO:0010558	7	negative regulation of macromolecule biosynthetic process	11	1357	1.99488	2.12549e-06	2.5277e-05	["Etv6","Id3","Il6","Irak2","Irf8","Ncor2","Prdm1","Psen2","Stat1","Tcf3","Trps1"]
GO:0010557	7	positive regulation of macromolecule biosynthetic process	12	1674	2.46089	2.30093e-06	2.61938e-05	["Etv6","Il6","Irak2","Irf8","Med14","Myd88","Ncoa3","Nr3c1","Smarcc1","Stat1","Suco","Tcf3"]
GO:0097296	9	activation of cysteine-type endopeptidase activity involved in apoptotic signaling pathway	3	18	0.0264612	2.32653e-06	2.61938e-05	["Cd14","Fas","Ly96"]
GO:1901700	4	response to oxygen-containing compound	12	1676	2.46383	2.32996e-06	2.61938e-05	["Cd14","Cxcl1","Fas","Il6","Irf8","Ly96","Myd88","Ncoa3","Ncor2","Nr3c1","Stat1","Tcf3"]
GO:0006950	3	response to stress	16	3149	4.62923	2.33813e-06	2.61938e-05	["Cd14","Ctss","Cxcl1","Fas","Id3","Ifih1","Ikbke","Il6","Irak2","Irf8","Ly96","Myd88","Psen2","Stat1","Uba7","Vac14"]
GO:0006355	7	regulation of transcription, DNA-templated	16	3173	4.66451	2.58987e-06	2.85996e-05	["Etv6","Id3","Il6","Irak2","Irf8","Med14","Myd88","Ncoa3","Ncor2","Nr3c1","Prdm1","Psen2","Smarcc1","Stat1","Tcf3","Trps1"]
GO:0010556	6	regulation of macromolecule biosynthetic process	17	3626	5.33045	2.84118e-06	3.05123e-05	["Etv6","Id3","Il6","Irak2","Irf8","Med14","Myd88","Ncoa3","Ncor2","Nr3c1","Prdm1","Psen2","Smarcc1","Stat1","Suco","Tcf3","Trps1"]
GO:1903506	8	regulation of nucleic acid-templated transcription	16	3195	4.69685	2.84203e-06	3.05123e-05	["Etv6","Id3","Il6","Irak2","Irf8","Med14","Myd88","Ncoa3","Ncor2","Nr3c1","Prdm1","Psen2","Smarcc1","Stat1","Tcf3","Trps1"]
GO:2001141	7	regulation of RNA biosynthetic process	16	3215	4.72626	3.09041e-06	3.24208e-05	["Etv6","Id3","Il6","Irak2","Irf8","Med14","Myd88","Ncoa3","Ncor2","Nr3c1","Prdm1","Psen2","Smarcc1","Stat1","Tcf3","Trps1"]
GO:0051604	5	protein maturation	6	282	0.414558	3.10367e-06	3.24208e-05	["Cd14","Ctss","Fas","Ly96","Psen2","Stat1"]
GO:0045892	8	negative regulation of transcription, DNA-templated	10	1130	1.66117	3.21402e-06	3.31259e-05	["Etv6","Id3","Irak2","Irf8","Ncor2","Prdm1","Psen2","Stat1","Tcf3","Trps1"]
GO:0050871	8	positive regulation of B cell activation	4	70	0.102904	3.31309e-06	3.34105e-05	["Il6","Il7","Prdm1","Tcf3"]
GO:0031327	7	negative regulation of cellular biosynthetic process	11	1421	2.08896	3.32808e-06	3.34105e-05	["Etv6","Id3","Il6","Irak2","Irf8","Ncor2","Prdm1","Psen2","Stat1","Tcf3","Trps1"]
GO:0010033	4	response to organic substance	14	2455	3.60901	3.66101e-06	3.62816e-05	["Cd14","Ctss","Cxcl1","Fas","Il6","Irak2","Irf8","Ly96","Myd88","Ncoa3","Ncor2","Nr3c1","Stat1","Tcf3"]
GO:0010628	7	positive regulation of gene expression	12	1757	2.5829	3.81733e-06	3.71459e-05	["Etv6","Il6","Irak2","Irf8","Med14","Myd88","Ncoa3","Nr3c1","Prdm1","Smarcc1","Stat1","Tcf3"]
GO:0038123	8	toll-like receptor TLR1:TLR2 signaling pathway	4	73	0.107315	3.92074e-06	3.71459e-05	["Cd14","Irak2","Ly96","Myd88"]
GO:0038124	8	toll-like receptor TLR6:TLR2 signaling pathway	4	73	0.107315	3.92074e-06	3.71459e-05	["Cd14","Irak2","Ly96","Myd88"]
GO:0009890	6	negative regulation of biosynthetic process	11	1446	2.12571	3.94044e-06	3.71459e-05	["Etv6","Id3","Il6","Irak2","Irf8","Ncor2","Prdm1","Psen2","Stat1","Tcf3","Trps1"]
GO:1903507	9	negative regulation of nucleic acid-templated transcription	10	1159	1.7038	4.03041e-06	3.75362e-05	["Etv6","Id3","Irak2","Irf8","Ncor2","Prdm1","Psen2","Stat1","Tcf3","Trps1"]
GO:0043170	4	macromolecule metabolic process	23	6877	10.1096	4.35695e-06	3.93078e-05	["Cd14","Ctss","Etv6","Fas","Id3","Ifih1","Ikbke","Irak2","Irf8","Ly96","Med14","Myd88","Ncoa3","Ncor2","Nr3c1","Prdm1","Psen2","Rars","Smarcc1","Stat1","Tcf3","Trps1","Uba7"]
GO:0034134	8	toll-like receptor 2 signaling pathway	4	75	0.110255	4.36925e-06	3.93078e-05	["Cd14","Irak2","Ly96","Myd88"]
GO:2001269	8	positive regulation of cysteine-type endopeptidase activity involved in apoptotic signaling pathway	3	22	0.0323414	4.37318e-06	3.93078e-05	["Cd14","Fas","Ly96"]
GO:1902679	8	negative regulation of RNA biosynthetic process	10	1174	1.72586	4.51966e-06	3.98601e-05	["Etv6","Id3","Irak2","Irf8","Ncor2","Prdm1","Psen2","Stat1","Tcf3","Trps1"]
GO:0045893	8	positive regulation of transcription, DNA-templated	11	1469	2.15952	4.58932e-06	3.98601e-05	["Etv6","Il6","Irak2","Irf8","Med14","Myd88","Ncoa3","Nr3c1","Smarcc1","Stat1","Tcf3"]
GO:1903508	9	positive regulation of nucleic acid-templated transcription	11	1469	2.15952	4.58932e-06	3.98601e-05	["Etv6","Il6","Irak2","Irf8","Med14","Myd88","Ncoa3","Nr3c1","Smarcc1","Stat1","Tcf3"]
GO:0051252	6	regulation of RNA metabolic process	16	3317	4.8762	4.69211e-06	4.03e-05	["Etv6","Id3","Il6","Irak2","Irf8","Med14","Myd88","Ncoa3","Ncor2","Nr3c1","Prdm1","Psen2","Smarcc1","Stat1","Tcf3","Trps1"]
GO:0044238	3	primary metabolic process	25	8175	12.0178	4.74783e-06	4.03305e-05	["Acot7","Cd14","Ctss","Etv6","Fas","Id3","Ifih1","Ikbke","Irak2","Irf8","Ly96","Med14","Myd88","Ncoa3","Ncor2","Nr3c1","Prdm1","Psen2","Rars","Smarcc1","Stat1","Tcf3","Trps1","Uba7","Vac14"]
GO:0035666	9	TRIF-dependent toll-like receptor signaling pathway	4	77	0.113195	4.85465e-06	4.07896e-05	["Cd14","Ikbke","Irak2","Ly96"]
GO:1902680	8	positive regulation of RNA biosynthetic process	11	1494	2.19628	5.39964e-06	4.48809e-05	["Etv6","Il6","Irak2","Irf8","Med14","Myd88","Ncoa3","Nr3c1","Smarcc1","Stat1","Tcf3"]
GO:0002756	8	MyD88-independent toll-like receptor signaling pathway	4	80	0.117605	5.65608e-06	4.65123e-05	["Cd14","Ikbke","Irak2","Ly96"]
GO:0009966	5	regulation of signal transduction	14	2551	3.75013	5.76875e-06	4.65783e-05	["Cd14","Fas","Ikbke","Il6","Il7","Irak2","Ly96","Myd88","Ncoa3","Nr3c1","Prdm1","Psen2","Stat1","Trps1"]
GO:0042221	3	response to chemical	15	2949	4.33522	5.7862e-06	4.65783e-05	["Bcar3","Cd14","Ctss","Cxcl1","Fas","Il6","Irak2","Irf8","Ly96","Myd88","Ncoa3","Ncor2","Nr3c1","Stat1","Tcf3"]
GO:0050896	2	response to stimulus	22	6393	9.39812	5.84489e-06	4.65783e-05	["Bcar3","Cd14","Ctss","Cxcl1","Fas","Id3","Ifih1","Ikbke","Il6","Il7","Irak2","Irf8","Ly96","Myd88","Ncoa3","Ncor2","Nr3c1","Psen2","Stat1","Tcf3","Uba7","Vac14"]
GO:0009653	3	anatomical structure morphogenesis	11	1514	2.22568	6.13591e-06	4.80843e-05	["Bcar3","Id3","Il6","Il7","Ncoa3","Ncor2","Nr3c1","Prdm1","Psen2","Smarcc1","Tcf3"]
GO:0023056	5	positive regulation of signaling	11	1515	2.22715	6.17494e-06	4.80843e-05	["Cd14","Fas","Ikbke","Il6","Irak2","Ly96","Myd88","Ncoa3","Nr3c1","Psen2","Trps1"]
GO:0051253	7	negative regulation of RNA metabolic process	10	1217	1.78907	6.22048e-06	4.80843e-05	["Etv6","Id3","Irak2","Irf8","Ncor2","Prdm1","Psen2","Stat1","Tcf3","Trps1"]
GO:0034654	5	nucleobase-containing compound biosynthetic process	14	2570	3.77806	6.29654e-06	4.81904e-05	["Acot7","Etv6","Id3","Irf8","Med14","Ncoa3","Ncor2","Nr3c1","Prdm1","Smarcc1","Stat1","Tcf3","Trps1","Uba7"]
GO:0010647	6	positive regulation of cell communication	11	1521	2.23597	6.4137e-06	4.86058e-05	["Cd14","Fas","Ikbke","Il6","Irak2","Ly96","Myd88","Ncoa3","Nr3c1","Psen2","Trps1"]
GO:0002755	8	MyD88-dependent toll-like receptor signaling pathway	4	83	0.122015	6.55139e-06	4.86945e-05	["Cd14","Irak2","Ly96","Myd88"]
GO:0034138	8	toll-like receptor 3 signaling pathway	4	83	0.122015	6.55139e-06	4.86945e-05	["Cd14","Ikbke","Irak2","Ly96"]
GO:0048856	3	anatomical structure development	16	3413	5.01733	6.85277e-06	4.96495e-05	["Ctss","Cxcl1","Fas","Id3","Il6","Myd88","Ncoa3","Ncor2","Nr3c1","Pdlim5","Prdm1","Psen2","Smarcc1","Stat1","Tcf3","Trps1"]
GO:0009891	6	positive regulation of biosynthetic process	12	1859	2.73285	6.85284e-06	4.96495e-05	["Etv6","Il6","Irak2","Irf8","Med14","Myd88","Ncoa3","Nr3c1","Smarcc1","Stat1","Suco","Tcf3"]
GO:0051254	7	positive regulation of RNA metabolic process	11	1532	2.25214	6.87257e-06	4.96495e-05	["Etv6","Il6","Irak2","Irf8","Med14","Myd88","Ncoa3","Nr3c1","Smarcc1","Stat1","Tcf3"]
GO:0071396	6	cellular response to lipid	7	503	0.739442	7.0119e-06	5.01871e-05	["Cd14","Fas","Il6","Irf8","Ncoa3","Nr3c1","Stat1"]
GO:0030522	6	intracellular receptor signaling pathway	5	186	0.273432	7.27558e-06	5.15965e-05	["Ifih1","Irak2","Med14","Ncoa3","Nr3c1"]
GO:2001267	7	regulation of cysteine-type endopeptidase activity involved in apoptotic signaling pathway	3	26	0.0382217	7.35376e-06	5.16769e-05	["Cd14","Fas","Ly96"]
GO:0009889	5	regulation of biosynthetic process	17	3890	5.71855	7.63547e-06	5.31731e-05	["Etv6","Id3","Il6","Irak2","Irf8","Med14","Myd88","Ncoa3","Ncor2","Nr3c1","Prdm1","Psen2","Smarcc1","Stat1","Suco","Tcf3","Trps1"]
GO:0050670	7	regulation of lymphocyte proliferation	5	190	0.279312	8.0679e-06	5.56829e-05	["Il6","Il7","Myd88","Prdm1","Tcf3"]
GO:0044763	3	single-organism cellular process	27	9820	14.436	8.32891e-06	5.69757e-05	["Acot7","Cd14","Cep131","Ctss","Cxcl1","Etv6","Fas","Id3","Ikbke","Il6","Il7","Irak2","Irf8","Ly96","Myd88","Ncoa3","Ncor2","Nr3c1","Prdm1","Psen2","Rars","Smarcc1","Stat1","Tcf3","Trps1","Uba7","Vac14"]
GO:0032944	7	regulation of mononuclear cell proliferation	5	192	0.282252	8.4886e-06	5.75587e-05	["Il6","Il7","Myd88","Prdm1","Tcf3"]
GO:0009892	5	negative regulation of metabolic process	14	2639	3.8795	8.59721e-06	5.77882e-05	["Etv6","Fas","Id3","Il6","Il7","Irak2","Irf8","Ncor2","Prdm1","Psen2","Smarcc1","Stat1","Tcf3","Trps1"]
GO:0018130	5	heterocycle biosynthetic process	14	2643	3.88538	8.75117e-06	5.8316e-05	["Acot7","Etv6","Id3","Irf8","Med14","Ncoa3","Ncor2","Nr3c1","Prdm1","Smarcc1","Stat1","Tcf3","Trps1","Uba7"]
GO:0019438	5	aromatic compound biosynthetic process	14	2650	3.89567	9.02655e-06	5.96369e-05	["Acot7","Etv6","Id3","Irf8","Med14","Ncoa3","Ncor2","Nr3c1","Prdm1","Smarcc1","Stat1","Tcf3","Trps1","Uba7"]
GO:2000112	7	regulation of cellular macromolecule biosynthetic process	16	3507	5.15551	9.80489e-06	6.34616e-05	["Etv6","Id3","Il6","Irak2","Irf8","Med14","Myd88","Ncoa3","Ncor2","Nr3c1","Prdm1","Psen2","Smarcc1","Stat1","Tcf3","Trps1"]
GO:0042127	5	regulation of cell proliferation	11	1591	2.33887	9.86078e-06	6.34616e-05	["Cep131","Cxcl1","Fas","Id3","Il6","Il7","Myd88","Nr3c1","Prdm1","Stat1","Tcf3"]
GO:2000113	8	negative regulation of cellular macromolecule biosynthetic process	10	1283	1.88609	9.91265e-06	6.34616e-05	["Etv6","Id3","Irak2","Irf8","Ncor2","Prdm1","Psen2","Stat1","Tcf3","Trps1"]
GO:0071704	3	organic substance metabolic process	25	8475	12.4588	9.99165e-06	6.34616e-05	["Acot7","Cd14","Ctss","Etv6","Fas","Id3","Ifih1","Ikbke","Irak2","Irf8","Ly96","Med14","Myd88","Ncoa3","Ncor2","Nr3c1","Prdm1","Psen2","Rars","Smarcc1","Stat1","Tcf3","Trps1","Uba7","Vac14"]
GO:0070663	6	regulation of leukocyte proliferation	5	199	0.292543	1.0098e-05	6.34616e-05	["Il6","Il7","Myd88","Prdm1","Tcf3"]
GO:2001235	7	positive regulation of apoptotic signaling pathway	5	199	0.292543	1.0098e-05	6.34616e-05	["Cd14","Fas","Ly96","Psen2","Trps1"]
GO:0010605	6	negative regulation of macromolecule metabolic process	13	2308	3.39291	1.09544e-05	6.77423e-05	["Etv6","Fas","Id3","Il6","Irak2","Irf8","Ncor2","Prdm1","Psen2","Smarcc1","Stat1","Tcf3","Trps1"]
GO:0031324	6	negative regulation of cellular metabolic process	13	2308	3.39291	1.09544e-05	6.77423e-05	["Etv6","Fas","Id3","Il6","Irak2","Irf8","Ncor2","Prdm1","Psen2","Smarcc1","Stat1","Tcf3","Trps1"]
GO:0045087	4	innate immune response	8	764	1.12313	1.13178e-05	6.94341e-05	["Cd14","Ctss","Ifih1","Ikbke","Irak2","Ly96","Myd88","Uba7"]
GO:0044271	5	cellular nitrogen compound biosynthetic process	14	2727	4.00886	1.26101e-05	7.67526e-05	["Acot7","Etv6","Id3","Irf8","Med14","Ncoa3","Ncor2","Nr3c1","Prdm1","Smarcc1","Stat1","Tcf3","Trps1","Uba7"]
GO:0006919	9	activation of cysteine-type endopeptidase activity involved in apoptotic process	4	100	0.147006	1.37363e-05	8.19747e-05	["Cd14","Fas","Ly96","Stat1"]
GO:0001817	5	regulation of cytokine production	7	558	0.820296	1.3759e-05	8.19747e-05	["Cd14","Ifih1","Ikbke","Il6","Irf8","Myd88","Uba7"]
GO:0034645	5	cellular macromolecule biosynthetic process	14	2748	4.03974	1.37862e-05	8.19747e-05	["Etv6","Id3","Irf8","Med14","Ncoa3","Ncor2","Nr3c1","Prdm1","Rars","Smarcc1","Stat1","Tcf3","Trps1","Uba7"]
GO:0070555	6	response to interleukin-1	4	101	0.148476	1.42879e-05	8.43097e-05	["Fas","Il6","Irak2","Myd88"]
GO:0045934	7	negative regulation of nucleobase-containing compound metabolic process	10	1341	1.97136	1.46006e-05	8.55022e-05	["Etv6","Id3","Irak2","Irf8","Ncor2","Prdm1","Psen2","Stat1","Tcf3","Trps1"]
GO:0051090	4	regulation of sequence-specific DNA binding transcription factor activity	6	371	0.545394	1.48641e-05	8.59046e-05	["Id3","Il6","Irak2","Myd88","Ncoa3","Tcf3"]
GO:0045944	9	positive regulation of transcription from RNA polymerase II promoter	9	1054	1.54945	1.48916e-05	8.59046e-05	["Etv6","Il6","Irf8","Med14","Ncoa3","Nr3c1","Smarcc1","Stat1","Tcf3"]
GO:0080134	5	regulation of response to stress	10	1347	1.98018	1.51806e-05	8.69228e-05	["Cd14","Ctss","Cxcl1","Ifih1","Ikbke","Il6","Irak2","Ly96","Myd88","Stat1"]
GO:1901362	5	organic cyclic compound biosynthetic process	14	2778	4.08384	1.56364e-05	8.88746e-05	["Acot7","Etv6","Id3","Irf8","Med14","Ncoa3","Ncor2","Nr3c1","Prdm1","Smarcc1","Stat1","Tcf3","Trps1","Uba7"]
GO:0032270	7	positive regulation of cellular protein metabolic process	10	1355	1.99194	1.59848e-05	8.99971e-05	["Bcar3","Cd14","Fas","Il6","Irak2","Ly96","Myd88","Ncor2","Psen2","Stat1"]
GO:0019219	6	regulation of nucleobase-containing compound metabolic process	16	3642	5.35397	1.60668e-05	8.99971e-05	["Etv6","Id3","Il6","Irak2","Irf8","Med14","Myd88","Ncoa3","Ncor2","Nr3c1","Prdm1","Psen2","Smarcc1","Stat1","Tcf3","Trps1"]
GO:0051249	6	regulation of lymphocyte activation	6	379	0.557154	1.67687e-05	9.32533e-05	["Fas","Il6","Il7","Myd88","Prdm1","Tcf3"]
GO:0051172	6	negative regulation of nitrogen compound metabolic process	10	1366	2.00811	1.71508e-05	9.45592e-05	["Etv6","Id3","Irak2","Irf8","Ncor2","Prdm1","Psen2","Stat1","Tcf3","Trps1"]
GO:0097202	8	activation of cysteine-type endopeptidase activity	4	106	0.155827	1.72945e-05	9.45592e-05	["Cd14","Fas","Ly96","Stat1"]
GO:0009628	3	response to abiotic stimulus	10	1368	2.01105	1.73705e-05	9.45592e-05	["Cd14","Ctss","Cxcl1","Fas","Il6","Myd88","Nr3c1","Psen2","Stat1","Vac14"]
GO:0043281	8	regulation of cysteine-type endopeptidase activity involved in apoptotic process	5	230	0.338115	2.03033e-05	0.000109752	["Cd14","Fas","Il6","Ly96","Stat1"]
GO:0032479	6	regulation of type I interferon production	4	112	0.164647	2.14887e-05	0.000115352	["Ifih1","Ikbke","Myd88","Uba7"]
GO:0051091	5	positive regulation of sequence-specific DNA binding transcription factor activity	5	235	0.345465	2.25119e-05	0.000120012	["Il6","Irak2","Myd88","Ncoa3","Tcf3"]
GO:2000026	5	regulation of multicellular organismal development	11	1742	2.56085	2.32233e-05	0.000122956	["Cxcl1","Fas","Il6","Il7","Ncoa3","Nr3c1","Pdlim5","Prdm1","Stat1","Tcf3","Trps1"]
GO:0045935	7	positive regulation of nucleobase-containing compound metabolic process	11	1744	2.56379	2.34743e-05	0.000122965	["Etv6","Il6","Irak2","Irf8","Med14","Myd88","Ncoa3","Nr3c1","Smarcc1","Stat1","Tcf3"]
GO:0051171	5	regulation of nitrogen compound metabolic process	16	3751	5.51421	2.35431e-05	0.000122965	["Etv6","Id3","Il6","Irak2","Irf8","Med14","Myd88","Ncoa3","Ncor2","Nr3c1","Prdm1","Psen2","Smarcc1","Stat1","Tcf3","Trps1"]
GO:0009987	2	cellular process	30	12806	18.8256	2.37071e-05	0.000122991	["Acot7","Cd14","Cep131","Ctss","Cxcl1","Etv6","Fas","Id3","Ifih1","Ikbke","Il6","Il7","Irak2","Irf8","Kpna3","Ly96","Med14","Myd88","Ncoa3","Ncor2","Nr3c1","Prdm1","Psen2","Rars","Smarcc1","Stat1","Tcf3","Trps1","Uba7","Vac14"]
GO:0006351	6	transcription, DNA-templated	12	2110	3.10184	2.49176e-05	0.000128168	["Etv6","Id3","Irf8","Med14","Ncoa3","Ncor2","Nr3c1","Prdm1","Smarcc1","Stat1","Tcf3","Trps1"]
GO:0097659	7	nucleic acid-templated transcription	12	2111	3.10331	2.50366e-05	0.000128168	["Etv6","Id3","Irf8","Med14","Ncoa3","Ncor2","Nr3c1","Prdm1","Smarcc1","Stat1","Tcf3","Trps1"]
GO:2000116	8	regulation of cysteine-type endopeptidase activity	5	241	0.354285	2.54044e-05	0.000129195	["Cd14","Fas","Il6","Ly96","Stat1"]
GO:0050671	8	positive regulation of lymphocyte proliferation	4	118	0.173468	2.63864e-05	0.000133312	["Il6","Il7","Myd88","Tcf3"]
GO:2001233	6	regulation of apoptotic signaling pathway	6	412	0.605666	2.6826e-05	0.000133742	["Cd14","Fas","Il7","Ly96","Psen2","Trps1"]
GO:0051251	7	positive regulation of lymphocyte activation	5	244	0.358696	2.6955e-05	0.000133742	["Il6","Il7","Myd88","Prdm1","Tcf3"]
GO:0044249	4	cellular biosynthetic process	16	3791	5.57301	2.69906e-05	0.000133742	["Acot7","Etv6","Id3","Irf8","Med14","Ncoa3","Ncor2","Nr3c1","Prdm1","Rars","Smarcc1","Stat1","Tcf3","Trps1","Uba7","Vac14"]
GO:0023051	4	regulation of signaling	14	2916	4.28671	2.73276e-05	0.000134223	["Cd14","Fas","Ikbke","Il6","Il7","Irak2","Ly96","Myd88","Ncoa3","Nr3c1","Prdm1","Psen2","Stat1","Trps1"]
GO:0009059	5	macromolecule biosynthetic process	14	2917	4.28818	2.74351e-05	0.000134223	["Etv6","Id3","Irf8","Med14","Ncoa3","Ncor2","Nr3c1","Prdm1","Rars","Smarcc1","Stat1","Tcf3","Trps1","Uba7"]
GO:0051173	6	positive regulation of nitrogen compound metabolic process	11	1776	2.61083	2.78243e-05	0.000135272	["Etv6","Il6","Irak2","Irf8","Med14","Myd88","Ncoa3","Nr3c1","Smarcc1","Stat1","Tcf3"]
GO:0032946	8	positive regulation of mononuclear cell proliferation	4	120	0.176408	2.81874e-05	0.00013618	["Il6","Il7","Myd88","Tcf3"]
GO:0051247	7	positive regulation of protein metabolic process	10	1448	2.12865	2.8414e-05	0.000136422	["Bcar3","Cd14","Fas","Il6","Irak2","Ly96","Myd88","Ncor2","Psen2","Stat1"]
GO:0010646	5	regulation of cell communication	14	2933	4.3117	2.92063e-05	0.000139361	["Cd14","Fas","Ikbke","Il6","Il7","Irak2","Ly96","Myd88","Ncoa3","Nr3c1","Prdm1","Psen2","Stat1","Trps1"]
GO:0008284	6	positive regulation of cell proliferation	8	880	1.29366	3.13314e-05	0.000148584	["Cep131","Cxcl1","Id3","Il6","Il7","Myd88","Stat1","Tcf3"]
GO:0031326	6	regulation of cellular biosynthetic process	16	3838	5.64211	3.16173e-05	0.000149025	["Etv6","Id3","Il6","Irak2","Irf8","Med14","Myd88","Ncoa3","Ncor2","Nr3c1","Prdm1","Psen2","Smarcc1","Stat1","Tcf3","Trps1"]
GO:0032480	7	negative regulation of type I interferon production	3	42	0.0617427	3.19533e-05	0.000149282	["Ifih1","Ikbke","Uba7"]
GO:0070665	7	positive regulation of leukocyte proliferation	4	124	0.182288	3.20579e-05	0.000149282	["Il6","Il7","Myd88","Tcf3"]
GO:0034097	5	response to cytokine	6	431	0.633598	3.45278e-05	0.00015982	["Cd14","Fas","Il6","Irak2","Myd88","Stat1"]
GO:0031638	7	zymogen activation	4	127	0.186698	3.52065e-05	0.000161992	["Cd14","Fas","Ly96","Stat1"]
GO:0031328	7	positive regulation of cellular biosynthetic process	11	1824	2.6814	3.56646e-05	0.000163128	["Etv6","Il6","Irak2","Irf8","Med14","Myd88","Ncoa3","Nr3c1","Smarcc1","Stat1","Tcf3"]
GO:0002694	5	regulation of leukocyte activation	6	442	0.649768	3.97424e-05	0.000180711	["Fas","Il6","Il7","Myd88","Prdm1","Tcf3"]
GO:0006954	5	inflammatory response	6	443	0.651238	4.02463e-05	0.000181932	["Cd14","Cxcl1","Il6","Irak2","Ly96","Myd88"]
GO:0002252	3	immune effector process	6	445	0.654179	4.12693e-05	0.000185472	["Fas","Ifih1","Il6","Myd88","Psen2","Stat1"]
GO:0010629	7	negative regulation of gene expression	10	1522	2.23744	4.35732e-05	0.000193503	["Etv6","Id3","Irak2","Irf8","Ncor2","Prdm1","Psen2","Stat1","Tcf3","Trps1"]
GO:1901576	4	organic substance biosynthetic process	16	3936	5.78617	4.36262e-05	0.000193503	["Acot7","Etv6","Id3","Irf8","Med14","Ncoa3","Ncor2","Nr3c1","Prdm1","Rars","Smarcc1","Stat1","Tcf3","Trps1","Uba7","Vac14"]
GO:0006925	8	inflammatory cell apoptotic process	2	7	0.0102904	4.38074e-05	0.000193503	["Fas","Il6"]
GO:0002696	6	positive regulation of leukocyte activation	5	272	0.399857	4.52602e-05	0.000198785	["Il6","Il7","Myd88","Prdm1","Tcf3"]
GO:0043280	9	positive regulation of cysteine-type endopeptidase activity involved in apoptotic process	4	136	0.199929	4.60159e-05	0.000200962	["Cd14","Fas","Ly96","Stat1"]
GO:0032870	5	cellular response to hormone stimulus	6	465	0.68358	5.26979e-05	0.000228851	["Ctss","Fas","Il6","Ncoa3","Nr3c1","Stat1"]
GO:0032774	6	RNA biosynthetic process	12	2282	3.35469	5.44526e-05	0.000234617	["Etv6","Id3","Irf8","Med14","Ncoa3","Ncor2","Nr3c1","Prdm1","Smarcc1","Stat1","Tcf3","Trps1"]
GO:0050867	6	positive regulation of cell activation	5	283	0.416028	5.46326e-05	0.000234617	["Il6","Il7","Myd88","Prdm1","Tcf3"]
GO:0009058	3	biosynthetic process	16	4021	5.91113	5.71988e-05	0.000242645	["Acot7","Etv6","Id3","Irf8","Med14","Ncoa3","Ncor2","Nr3c1","Prdm1","Rars","Smarcc1","Stat1","Tcf3","Trps1","Uba7","Vac14"]
GO:0043900	4	regulation of multi-organism process	6	472	0.69387	5.72502e-05	0.000242645	["Cxcl1","Irf8","Ly96","Myd88","Prdm1","Stat1"]
GO:0007249	7	I-kappaB kinase/NF-kappaB signaling	3	51	0.0749733	5.74439e-05	0.000242645	["Cd14","Irak2","Ly96"]
GO:2001056	9	positive regulation of cysteine-type endopeptidase activity	4	145	0.213159	5.90738e-05	0.000248174	["Cd14","Fas","Ly96","Stat1"]
GO:0050865	5	regulation of cell activation	6	476	0.699751	5.99898e-05	0.00025066	["Fas","Il6","Il7","Myd88","Prdm1","Tcf3"]
GO:0009605	3	response to external stimulus	10	1592	2.34034	6.38659e-05	0.000265421	["Cd14","Cxcl1","Fas","Ifih1","Il6","Irf8","Ly96","Myd88","Stat1","Tcf3"]
GO:0032268	6	regulation of cellular protein metabolic process	12	2327	3.42084	6.60188e-05	0.000272901	["Bcar3","Cd14","Fas","Il6","Irak2","Ly96","Myd88","Ncor2","Psen2","Smarcc1","Stat1","Trps1"]
GO:0097305	5	response to alcohol	6	490	0.720331	7.04182e-05	0.000289539	["Cd14","Cxcl1","Il6","Ncoa3","Ncor2","Nr3c1"]
GO:0048513	4	organ development	10	1617	2.37709	7.28568e-05	0.000297981	["Ctss","Fas","Id3","Ncoa3","Nr3c1","Pdlim5","Prdm1","Psen2","Smarcc1","Tcf3"]
GO:0043901	5	negative regulation of multi-organism process	4	154	0.22639	7.46508e-05	0.000302121	["Irf8","Myd88","Prdm1","Stat1"]
GO:0045619	7	regulation of lymphocyte differentiation	4	154	0.22639	7.46508e-05	0.000302121	["Fas","Il6","Il7","Prdm1"]
GO:1902041	8	regulation of extrinsic apoptotic signaling pathway via death domain receptors	3	57	0.0837937	8.02276e-05	0.000322221	["Fas","Psen2","Trps1"]
GO:0010950	8	positive regulation of endopeptidase activity	4	157	0.2308	8.04512e-05	0.000322221	["Cd14","Fas","Ly96","Stat1"]
GO:0009725	4	response to hormone	8	1009	1.48329	8.24368e-05	0.000328472	["Ctss","Cxcl1","Fas","Il6","Ncoa3","Ncor2","Nr3c1","Stat1"]
GO:0045165	5	cell fate commitment	4	162	0.23815	9.08386e-05	0.000360093	["Il6","Il7","Prdm1","Tcf3"]
GO:2001238	8	positive regulation of extrinsic apoptotic signaling pathway	3	61	0.0896739	9.82861e-05	0.000387628	["Fas","Psen2","Trps1"]
GO:0071383	6	cellular response to steroid hormone stimulus	4	166	0.244031	9.98255e-05	0.000391701	["Fas","Il6","Ncoa3","Nr3c1"]
GO:2001236	7	regulation of extrinsic apoptotic signaling pathway	4	169	0.248441	0.000106978	0.000417645	["Fas","Il7","Psen2","Trps1"]
GO:0030888	8	regulation of B cell proliferation	3	63	0.092614	0.000108231	0.000420415	["Il7","Prdm1","Tcf3"]
GO:0010952	7	positive regulation of peptidase activity	4	170	0.249911	0.000109442	0.000422994	["Cd14","Fas","Ly96","Stat1"]
GO:0008152	2	metabolic process	25	9566	14.0626	0.000113384	0.000436049	["Acot7","Cd14","Ctss","Etv6","Fas","Id3","Ifih1","Ikbke","Irak2","Irf8","Ly96","Med14","Myd88","Ncoa3","Ncor2","Nr3c1","Prdm1","Psen2","Rars","Smarcc1","Stat1","Tcf3","Trps1","Uba7","Vac14"]
GO:1903708	6	positive regulation of hemopoiesis	4	175	0.257261	0.000122389	0.00046835	["Cxcl1","Il6","Il7","Prdm1"]
GO:0051246	6	regulation of protein metabolic process	12	2488	3.65752	0.000126815	0.000482896	["Bcar3","Cd14","Fas","Il6","Irak2","Ly96","Myd88","Ncor2","Psen2","Smarcc1","Stat1","Trps1"]
GO:0032494	5	response to peptidoglycan	2	12	0.0176408	0.000137048	0.000516771	["Il6","Myd88"]
GO:0045073	7	regulation of chemokine biosynthetic process	2	12	0.0176408	0.000137048	0.000516771	["Il6","Myd88"]
GO:0051602	4	response to electrical stimulus	3	69	0.101434	0.000141943	0.000532631	["Cd14","Il6","Nr3c1"]
GO:0030162	7	regulation of proteolysis	7	809	1.18928	0.000144764	0.000540593	["Cd14","Fas","Il6","Ly96","Psen2","Smarcc1","Stat1"]
GO:1903706	5	regulation of hemopoiesis	5	349	0.513052	0.000146453	0.000544268	["Cxcl1","Fas","Il6","Il7","Prdm1"]
GO:0043085	5	positive regulation of catalytic activity	9	1414	2.07867	0.000147585	0.000545852	["Bcar3","Cd14","Cxcl1","Fas","Irak2","Ly96","Psen2","Stat1","Vac14"]
GO:0035556	6	intracellular signal transduction	10	1768	2.59907	0.000153699	0.000565757	["Bcar3","Cd14","Cxcl1","Ifih1","Ikbke","Irak2","Ly96","Myd88","Psen2","Stat1"]
GO:0030518	7	intracellular steroid hormone receptor signaling pathway	3	72	0.105845	0.000161089	0.000588716	["Med14","Ncoa3","Nr3c1"]
GO:0048869	4	cellular developmental process	13	2973	4.3705	0.000161459	0.000588716	["Cep131","Etv6","Id3","Il6","Il7","Irf8","Myd88","Ncor2","Prdm1","Psen2","Stat1","Tcf3","Trps1"]
GO:0016070	5	RNA metabolic process	13	2979	4.37932	0.000164836	0.000598209	["Etv6","Id3","Irf8","Med14","Ncoa3","Ncor2","Nr3c1","Prdm1","Rars","Smarcc1","Stat1","Tcf3","Trps1"]
GO:0007166	6	cell surface receptor signaling pathway	15	3893	5.72296	0.000166296	0.000600685	["Cd14","Cxcl1","Fas","Il6","Irak2","Irf8","Kpna3","Ly96","Myd88","Ncor2","Psen2","Smarcc1","Stat1","Trps1","Uba7"]
GO:0097190	6	apoptotic signaling pathway	5	361	0.530693	0.000171431	0.000616354	["Cd14","Fas","Ikbke","Ly96","Psen2"]
GO:0048661	7	positive regulation of smooth muscle cell proliferation	3	74	0.108785	0.000174741	0.000625347	["Il6","Myd88","Stat1"]
GO:0045862	8	positive regulation of proteolysis	5	363	0.533633	0.000175893	0.000626566	["Cd14","Fas","Ly96","Psen2","Stat1"]
GO:0006139	4	nucleobase-containing compound metabolic process	15	3924	5.76853	0.00018229	0.000646377	["Acot7","Etv6","Id3","Irf8","Med14","Ncoa3","Ncor2","Nr3c1","Prdm1","Rars","Smarcc1","Stat1","Tcf3","Trps1","Uba7"]
GO:0090304	5	nucleic acid metabolic process	14	3462	5.08936	0.000186103	0.000656884	["Etv6","Id3","Irf8","Med14","Ncoa3","Ncor2","Nr3c1","Prdm1","Rars","Smarcc1","Stat1","Tcf3","Trps1","Uba7"]
GO:0048545	5	response to steroid hormone	6	586	0.861458	0.000187373	0.000658362	["Cxcl1","Fas","Il6","Ncoa3","Ncor2","Nr3c1"]
GO:0006607	6	NLS-bearing protein import into nucleus	2	14	0.0205809	0.000188613	0.000659718	["Kpna3","Trps1"]
GO:0034641	4	cellular nitrogen compound metabolic process	16	4437	6.52267	0.000194429	0.000674677	["Acot7","Etv6","Id3","Irf8","Med14","Ncoa3","Ncor2","Nr3c1","Prdm1","Psen2","Rars","Smarcc1","Stat1","Tcf3","Trps1","Uba7"]
GO:0001819	6	positive regulation of cytokine production	5	371	0.545394	0.000194635	0.000674677	["Cd14","Ifih1","Il6","Irf8","Myd88"]
GO:0098542	4	defense response to other organism	5	378	0.555684	0.000212256	0.000732471	["Ifih1","Il6","Irf8","Myd88","Stat1"]
GO:0009719	3	response to endogenous stimulus	9	1492	2.19334	0.000221538	0.000760779	["Ctss","Cxcl1","Fas","Il6","Myd88","Ncoa3","Ncor2","Nr3c1","Stat1"]
GO:0044260	4	cellular macromolecule metabolic process	19	6092	8.95563	0.000222427	0.000760779	["Etv6","Id3","Ifih1","Ikbke","Irak2","Irf8","Med14","Myd88","Ncoa3","Ncor2","Nr3c1","Prdm1","Psen2","Rars","Smarcc1","Stat1","Tcf3","Trps1","Uba7"]
GO:0050790	4	regulation of catalytic activity	11	2241	3.29441	0.000231015	0.000786672	["Bcar3","Cd14","Cxcl1","Fas","Il6","Il7","Irak2","Ly96","Psen2","Stat1","Vac14"]
GO:0071222	6	cellular response to lipopolysaccharide	4	208	0.305773	0.000237374	0.000804782	["Cd14","Il6","Irf8","Stat1"]
GO:0002360	6	T cell lineage commitment	2	16	0.023521	0.000248263	0.000838022	["Il6","Il7"]
GO:0001818	6	negative regulation of cytokine production	4	211	0.310184	0.000250694	0.000842551	["Ifih1","Ikbke","Il6","Uba7"]
GO:0043903	5	regulation of symbiosis, encompassing mutualism through parasitism	4	216	0.317534	0.00027408	0.000917158	["Cxcl1","Irf8","Myd88","Stat1"]
GO:0071219	5	cellular response to molecule of bacterial origin	4	217	0.319004	0.000278938	0.000929394	["Cd14","Il6","Irf8","Stat1"]
GO:1902043	9	positive regulation of extrinsic apoptotic signaling pathway via death domain receptors	2	17	0.0249911	0.000281106	0.000932595	["Psen2","Trps1"]
GO:0045597	6	positive regulation of cell differentiation	7	909	1.33629	0.000296034	0.000977926	["Il6","Il7","Ncoa3","Nr3c1","Prdm1","Suco","Tcf3"]
GO:0051128	4	regulation of cellular component organization	11	2307	3.39144	0.000298362	0.000981421	["Cd14","Cep131","Fas","Il6","Irf8","Ncoa3","Nr3c1","Pdlim5","Psen2","Stat1","Trps1"]
GO:0045621	8	positive regulation of lymphocyte differentiation	3	89	0.130836	0.000301566	0.000987757	["Il6","Il7","Prdm1"]
GO:0002443	4	leukocyte mediated immunity	3	90	0.132306	0.000311653	0.00101649	["Fas","Il6","Myd88"]
GO:0046483	4	heterocycle metabolic process	15	4115	6.04931	0.000314322	0.00102089	["Acot7","Etv6","Id3","Irf8","Med14","Ncoa3","Ncor2","Nr3c1","Prdm1","Rars","Smarcc1","Stat1","Tcf3","Trps1","Uba7"]
GO:0033145	7	positive regulation of intracellular steroid hormone receptor signaling pathway	2	18	0.0264612	0.000315953	0.00102189	["Ncoa3","Nr3c1"]
GO:0052548	7	regulation of endopeptidase activity	5	417	0.613017	0.00033381	0.00107515	["Cd14","Fas","Il6","Ly96","Stat1"]
GO:0006725	4	cellular aromatic compound metabolic process	15	4145	6.09342	0.000341327	0.00108945	["Acot7","Etv6","Id3","Irf8","Med14","Ncoa3","Ncor2","Nr3c1","Prdm1","Rars","Smarcc1","Stat1","Tcf3","Trps1","Uba7"]
GO:1901701	5	cellular response to oxygen-containing compound	7	931	1.36863	0.000342292	0.00108945	["Cd14","Fas","Il6","Irf8","Ncoa3","Nr3c1","Stat1"]
GO:0051094	5	positive regulation of developmental process	8	1241	1.82435	0.000342479	0.00108945	["Cxcl1","Il6","Il7","Ncoa3","Nr3c1","Prdm1","Suco","Tcf3"]
GO:0031664	5	regulation of lipopolysaccharide-mediated signaling pathway	2	19	0.0279312	0.000352799	0.00110677	["Ly96","Prdm1"]
GO:0044130	6	negative regulation of growth of symbiont in host	2	19	0.0279312	0.000352799	0.00110677	["Irf8","Myd88"]
GO:0044146	6	negative regulation of growth of symbiont involved in interaction with host	2	19	0.0279312	0.000352799	0.00110677	["Irf8","Myd88"]
GO:0009615	4	response to virus	4	231	0.339585	0.000353651	0.00110677	["Ifih1","Il6","Myd88","Stat1"]
GO:0071216	4	cellular response to biotic stimulus	4	237	0.348405	0.00038969	0.00121095	["Cd14","Il6","Irf8","Stat1"]
GO:0044126	5	regulation of growth of symbiont in host	2	20	0.0294013	0.000391639	0.00121095	["Irf8","Myd88"]
GO:0044144	5	modulation of growth of symbiont involved in interaction with host	2	20	0.0294013	0.000391639	0.00121095	["Irf8","Myd88"]
GO:0010243	4	response to organonitrogen compound	7	956	1.40538	0.000401768	0.00123732	["Cxcl1","Fas","Il6","Myd88","Ncor2","Nr3c1","Stat1"]
GO:0051716	3	cellular response to stimulus	12	2810	4.13088	0.000403387	0.00123737	["Cd14","Ctss","Fas","Ikbke","Il6","Irak2","Irf8","Myd88","Ncoa3","Nr3c1","Stat1","Uba7"]
GO:0051384	7	response to glucocorticoid	4	242	0.355756	0.000421672	0.00128835	["Cxcl1","Fas","Il6","Nr3c1"]
GO:0052547	6	regulation of peptidase activity	5	449	0.660059	0.000468061	0.00142445	["Cd14","Fas","Il6","Ly96","Stat1"]
GO:0032103	6	positive regulation of response to external stimulus	4	250	0.367516	0.000476689	0.00144502	["Ctss","Cxcl1","Il6","Ly96"]
GO:0042592	4	homeostatic process	8	1307	1.92137	0.000485079	0.00146471	["Ctss","Cxcl1","Fas","Il6","Il7","Ncor2","Psen2","Stat1"]
GO:0045453	7	bone resorption	2	23	0.0338115	0.000520061	0.00156423	["Ctss","Il7"]
GO:0006807	3	nitrogen compound metabolic process	16	4818	7.08277	0.000523158	0.00156745	["Acot7","Etv6","Id3","Irf8","Med14","Ncoa3","Ncor2","Nr3c1","Prdm1","Psen2","Rars","Smarcc1","Stat1","Tcf3","Trps1","Uba7"]
GO:0009612	4	response to mechanical stimulus	4	258	0.379277	0.000536653	0.00159551	["Fas","Il6","Myd88","Stat1"]
GO:1902105	6	regulation of leukocyte differentiation	4	258	0.379277	0.000536653	0.00159551	["Fas","Il6","Il7","Prdm1"]
GO:0031960	6	response to corticosteroid	4	260	0.382217	0.000552446	0.00163617	["Cxcl1","Fas","Il6","Nr3c1"]
GO:0071310	5	cellular response to organic substance	8	1344	1.97577	0.000584233	0.00172371	["Cd14","Ctss","Fas","Il6","Irf8","Ncoa3","Nr3c1","Stat1"]
GO:1901360	4	organic cyclic compound metabolic process	15	4368	6.42124	0.000614293	0.00180551	["Acot7","Etv6","Id3","Irf8","Med14","Ncoa3","Ncor2","Nr3c1","Prdm1","Rars","Smarcc1","Stat1","Tcf3","Trps1","Uba7"]
GO:0009617	4	response to bacterium	4	268	0.393977	0.000618945	0.00181229	["Il6","Irf8","Myd88","Stat1"]
GO:0097191	7	extrinsic apoptotic signaling pathway	3	114	0.167587	0.000622784	0.00181665	["Cd14","Fas","Ly96"]
GO:0008283	3	cell proliferation	6	738	1.08491	0.00064145	0.00186406	["Cxcl1","Etv6","Il6","Ncor2","Prdm1","Stat1"]
GO:0051704	2	multi-organism process	8	1364	2.00517	0.000644361	0.0018646	["Ifih1","Il6","Irf8","Kpna3","Myd88","Nr3c1","Stat1","Vac14"]
GO:1901698	4	response to nitrogen compound	7	1035	1.52152	0.000646458	0.0018646	["Cxcl1","Fas","Il6","Myd88","Ncor2","Nr3c1","Stat1"]
GO:0048660	6	regulation of smooth muscle cell proliferation	3	117	0.171998	0.0006717	0.0019302	["Il6","Myd88","Stat1"]
GO:0034612	6	response to tumor necrosis factor	3	119	0.174938	0.000705636	0.00202021	["Cd14","Fas","Il6"]
GO:0032026	6	response to magnesium ion	2	28	0.0411618	0.000773444	0.00219806	["Cd14","Nr3c1"]
GO:0071887	8	leukocyte apoptotic process	2	28	0.0411618	0.000773444	0.00219806	["Fas","Il6"]
GO:0014070	5	response to organic cyclic compound	7	1073	1.57738	0.000800486	0.00226658	["Cxcl1","Fas","Il6","Ncoa3","Ncor2","Nr3c1","Stat1"]
GO:0051707	3	response to other organism	5	507	0.745323	0.000810861	0.00228757	["Ifih1","Il6","Irf8","Myd88","Stat1"]
GO:0042542	5	response to hydrogen peroxide	3	127	0.186698	0.000852274	0.00239567	["Fas","Il6","Stat1"]
GO:0030154	5	cell differentiation	10	2197	3.22973	0.00088561	0.00247929	["Cep131","Etv6","Id3","Irf8","Ncor2","Prdm1","Psen2","Stat1","Tcf3","Trps1"]
GO:0042832	5	defense response to protozoan	2	30	0.0441019	0.00088844	0.00247929	["Il6","Irf8"]
GO:0019538	4	protein metabolic process	14	4028	5.92142	0.000926213	0.0025754	["Cd14","Ctss","Fas","Ifih1","Ikbke","Irak2","Ly96","Myd88","Ncoa3","Psen2","Rars","Stat1","Tcf3","Uba7"]
GO:0051092	6	positive regulation of NF-kappaB transcription factor activity	3	132	0.194048	0.000953048	0.00264052	["Il6","Irak2","Myd88"]
GO:0045667	6	regulation of osteoblast differentiation	3	133	0.195519	0.000974068	0.00268797	["Id3","Il6","Suco"]
GO:0032101	5	regulation of response to external stimulus	6	800	1.17605	0.000977127	0.00268797	["Ctss","Cxcl1","Il6","Ly96","Myd88","Prdm1"]
GO:0002250	4	adaptive immune response	3	134	0.196989	0.000995381	0.00272847	["Ctss","Fas","Myd88"]
GO:0044237	3	cellular metabolic process	21	8016	11.784	0.00100196	0.0027368	["Acot7","Etv6","Id3","Ifih1","Ikbke","Irak2","Irf8","Med14","Myd88","Ncoa3","Ncor2","Nr3c1","Prdm1","Psen2","Rars","Smarcc1","Stat1","Tcf3","Trps1","Uba7","Vac14"]
GO:0002833	6	positive regulation of response to biotic stimulus	2	32	0.0470421	0.00101117	0.00274257	["Cxcl1","Ly96"]
GO:0021537	4	telencephalon development	2	32	0.0470421	0.00101117	0.00274257	["Fas","Ncor2"]
GO:0019724	6	B cell mediated immunity	2	33	0.0485121	0.00107541	0.0028965	["Fas","Myd88"]
GO:0033209	8	tumor necrosis factor-mediated signaling pathway	2	33	0.0485121	0.00107541	0.0028965	["Fas","Stat1"]
GO:0048872	5	homeostasis of number of cells	3	138	0.202869	0.00108358	0.00290837	["Fas","Il6","Il7"]
GO:0006508	5	proteolysis	7	1132	1.66411	0.00109629	0.0029323	["Cd14","Ctss","Fas","Ly96","Psen2","Stat1","Uba7"]
GO:0071495	4	cellular response to endogenous stimulus	6	822	1.20839	0.00112431	0.00299686	["Ctss","Fas","Il6","Ncoa3","Nr3c1","Stat1"]
GO:0001562	4	response to protozoan	2	34	0.0499822	0.00114158	0.00302205	["Il6","Irf8"]
GO:0002753	7	cytoplasmic pattern recognition receptor signaling pathway	2	34	0.0499822	0.00114158	0.00302205	["Ifih1","Irak2"]
GO:0009887	4	organ morphogenesis	5	548	0.805595	0.00114782	0.00302822	["Id3","Il7","Ncor2","Psen2","Smarcc1"]
GO:0097306	6	cellular response to alcohol	3	141	0.207279	0.00115288	0.00303122	["Il6","Ncoa3","Nr3c1"]
GO:1902107	7	positive regulation of leukocyte differentiation	3	142	0.208749	0.00117659	0.00308306	["Il6","Il7","Prdm1"]
GO:0050869	8	negative regulation of B cell activation	2	35	0.0514522	0.00120965	0.00314835	["Fas","Prdm1"]
GO:0090311	8	regulation of protein deacetylation	2	35	0.0514522	0.00120965	0.00314835	["Ncor2","Trps1"]
GO:0051607	4	defense response to virus	3	144	0.211689	0.00122492	0.0031774	["Ifih1","Il6","Stat1"]
GO:0042493	4	response to drug	5	563	0.827646	0.00129398	0.00334532	["Bcar3","Fas","Il6","Stat1","Tcf3"]
GO:0043627	6	response to estrogen	4	328	0.482181	0.00131074	0.00336612	["Cxcl1","Fas","Ncoa3","Ncor2"]
GO:0048732	4	gland development	4	328	0.482181	0.00131074	0.00336612	["Fas","Nr3c1","Psen2","Smarcc1"]
GO:0032965	7	regulation of collagen biosynthetic process	2	37	0.0543924	0.00135151	0.00345933	["Il6","Suco"]
GO:0006111	7	regulation of gluconeogenesis	2	41	0.0602726	0.00165792	0.0042157	["Il6","Nr3c1"]
GO:0030521	8	androgen receptor signaling pathway	2	41	0.0602726	0.00165792	0.0042157	["Med14","Ncoa3"]
GO:0006366	7	transcription from RNA polymerase II promoter	6	891	1.30983	0.00169914	0.00430635	["Etv6","Nr3c1","Prdm1","Stat1","Tcf3","Trps1"]
GO:0010035	4	response to inorganic substance	5	602	0.884979	0.00173859	0.00435087	["Cd14","Fas","Il6","Nr3c1","Stat1"]
GO:0010712	6	regulation of collagen metabolic process	2	42	0.0617427	0.00173922	0.00435087	["Il6","Suco"]
GO:0030890	9	positive regulation of B cell proliferation	2	42	0.0617427	0.00173922	0.00435087	["Il7","Tcf3"]
GO:0042698	3	ovulation cycle	2	42	0.0617427	0.00173922	0.00435087	["Fas","Ncor2"]
GO:0046622	6	positive regulation of organ growth	2	44	0.0646828	0.00190742	0.00475623	["Il7","Nr3c1"]
GO:0051147	6	regulation of muscle cell differentiation	3	169	0.248441	0.00193732	0.00480241	["Id3","Nr3c1","Tcf3"]
GO:0048511	2	rhythmic process	4	365	0.536573	0.00193836	0.00480241	["Fas","Id3","Ncor2","Nr3c1"]
GO:0071549	7	cellular response to dexamethasone stimulus	2	45	0.0661529	0.0019943	0.00492522	["Il6","Nr3c1"]
GO:0048878	5	chemical homeostasis	6	925	1.35981	0.00205423	0.00504948	["Cxcl1","Fas","Il6","Ncor2","Psen2","Stat1"]
GO:0043066	8	negative regulation of apoptotic process	6	926	1.36128	0.00206546	0.00504948	["Fas","Il6","Il7","Myd88","Ncoa3","Psen2"]
GO:0070887	4	cellular response to chemical stimulus	8	1633	2.40061	0.00206886	0.00504948	["Cd14","Ctss","Fas","Il6","Irf8","Ncoa3","Nr3c1","Stat1"]
GO:0007623	3	circadian rhythm	3	173	0.254321	0.00207074	0.00504948	["Fas","Id3","Nr3c1"]
GO:0060135	4	maternal process involved in female pregnancy	2	46	0.067623	0.00208304	0.00506349	["Fas","Prdm1"]
GO:0001656	5	metanephros development	2	47	0.069093	0.00217362	0.00525065	["Ctss","Id3"]
GO:0045599	7	negative regulation of fat cell differentiation	2	47	0.069093	0.00217362	0.00525065	["Il6","Ncor2"]
GO:0043069	7	negative regulation of programmed cell death	6	938	1.37892	0.00220399	0.00530742	["Fas","Il6","Il7","Myd88","Ncoa3","Psen2"]
GO:0032722	7	positive regulation of chemokine production	2	48	0.0705631	0.00226605	0.00543992	["Il6","Myd88"]
GO:0006325	4	chromatin organization	5	641	0.942311	0.00228701	0.00547325	["Ncoa3","Ncor2","Nr3c1","Smarcc1","Tcf3"]
GO:0009408	4	response to heat	3	181	0.266082	0.00235448	0.00561733	["Cd14","Cxcl1","Il6"]
GO:0010038	5	response to metal ion	4	387	0.568915	0.00239699	0.00570115	["Cd14","Fas","Il6","Nr3c1"]
GO:2001239	8	regulation of extrinsic apoptotic signaling pathway in absence of ligand	2	50	0.0735032	0.0024564	0.00582453	["Fas","Il7"]
GO:0009790	4	embryo development	4	390	0.573325	0.00246485	0.00582669	["Fas","Ncor2","Prdm1","Psen2"]
GO:0051050	5	positive regulation of transport	6	963	1.41567	0.00251522	0.00592764	["Cd14","Cep131","Ctss","Cxcl1","Il6","Nr3c1"]
GO:0048609	3	multicellular organismal reproductive process	5	657	0.965832	0.00254518	0.00598001	["Cep131","Fas","Ncor2","Nr3c1","Prdm1"]
GO:0001763	4	morphogenesis of a branching structure	3	187	0.274902	0.00258238	0.00604903	["Il6","Ncoa3","Prdm1"]
GO:0045861	8	negative regulation of proteolysis	4	398	0.585086	0.00265228	0.00617946	["Fas","Il6","Psen2","Smarcc1"]
GO:0060333	8	interferon-gamma-mediated signaling pathway	2	52	0.0764433	0.00265405	0.00617946	["Irf8","Stat1"]
GO:0032868	6	response to insulin	3	191	0.280782	0.00274164	0.00636423	["Il6","Nr3c1","Stat1"]
GO:0060998	8	regulation of dendritic spine development	2	53	0.0779134	0.0027556	0.00637749	["Nr3c1","Pdlim5"]
GO:0043434	5	response to peptide hormone	4	405	0.595376	0.00282415	0.00651662	["Fas","Il6","Nr3c1","Stat1"]
GO:0065008	3	regulation of biological quality	11	3015	4.43224	0.00283815	0.00652943	["Ctss","Cxcl1","Fas","Il6","Il7","Myd88","Ncor2","Nr3c1","Psen2","Stat1","Tcf3"]
GO:0044246	5	regulation of multicellular organismal metabolic process	2	54	0.0793835	0.00285896	0.0065578	["Il6","Suco"]
GO:0048731	4	system development	6	989	1.45389	0.00287318	0.00657091	["Cxcl1","Id3","Ncoa3","Smarcc1","Tcf3","Trps1"]
GO:0040008	4	regulation of growth	5	680	0.999644	0.00295281	0.0067331	["Il7","Irf8","Myd88","Ncoa3","Nr3c1"]
GO:0060337	8	type I interferon signaling pathway	2	55	0.0808535	0.00296413	0.00673904	["Irf8","Stat1"]
GO:0071407	6	cellular response to organic cyclic compound	4	412	0.605666	0.00300354	0.00680862	["Fas","Il6","Ncoa3","Nr3c1"]
GO:0022414	2	reproductive process	7	1355	1.99194	0.00306989	0.00692115	["Cep131","Fas","Ncoa3","Ncor2","Nr3c1","Prdm1","Smarcc1"]
GO:0072089	4	stem cell proliferation	2	56	0.0823236	0.00307109	0.00692115	["Etv6","Stat1"]
GO:0006909	4	phagocytosis	2	57	0.0837937	0.00317985	0.00714543	["Cd14","Irf8"]
GO:0060548	6	negative regulation of cell death	6	1017	1.49506	0.00330041	0.00739484	["Fas","Il6","Il7","Myd88","Ncoa3","Psen2"]
GO:0010565	6	regulation of cellular ketone metabolic process	3	205	0.301363	0.00334645	0.00747631	["Il6","Ncor2","Nr3c1"]
GO:0032760	8	positive regulation of tumor necrosis factor production	2	59	0.0867338	0.00340273	0.00755837	["Cd14","Myd88"]
GO:0071548	6	response to dexamethasone	2	59	0.0867338	0.00340273	0.00755837	["Il6","Nr3c1"]
GO:0033500	6	carbohydrate homeostasis	3	208	0.305773	0.00348584	0.00769872	["Fas","Il6","Ncor2"]
GO:0042593	7	glucose homeostasis	3	208	0.305773	0.00348584	0.00769872	["Fas","Il6","Ncor2"]
GO:0032355	6	response to estradiol	3	210	0.308713	0.00358072	0.00788574	["Cxcl1","Ncoa3","Ncor2"]
GO:1903557	7	positive regulation of tumor necrosis factor superfamily cytokine production	2	61	0.0896739	0.00363272	0.00797755	["Cd14","Myd88"]
GO:0030278	5	regulation of ossification	3	212	0.311654	0.00367717	0.00805227	["Id3","Il6","Suco"]
GO:0007254	7	JNK cascade	2	62	0.091144	0.00375038	0.00816631	["Irak2","Myd88"]
GO:0032755	7	positive regulation of interleukin-6 production	2	62	0.091144	0.00375038	0.00816631	["Il6","Myd88"]
GO:0070301	6	cellular response to hydrogen peroxide	2	63	0.092614	0.00386979	0.00839003	["Fas","Il6"]
GO:0000302	5	response to reactive oxygen species	3	216	0.317534	0.00387483	0.00839003	["Fas","Il6","Stat1"]
GO:1901652	5	response to peptide	4	446	0.655649	0.00398711	0.00860905	["Fas","Il6","Nr3c1","Stat1"]
GO:0034166	8	toll-like receptor 10 signaling pathway	2	65	0.0955542	0.00411389	0.00883343	["Irak2","Myd88"]
GO:0071347	7	cellular response to interleukin-1	2	65	0.0955542	0.00411389	0.00883343	["Fas","Il6"]
GO:0051241	5	negative regulation of multicellular organismal process	6	1067	1.56856	0.00418022	0.00893286	["Id3","Ifih1","Ikbke","Il6","Stat1","Uba7"]
GO:0048534	4	hematopoietic or lymphoid organ development	3	222	0.326354	0.00418331	0.00893286	["Fas","Psen2","Tcf3"]
GO:0002831	5	regulation of response to biotic stimulus	3	223	0.327824	0.00423613	0.00900112	["Cxcl1","Ly96","Prdm1"]
GO:0034146	8	toll-like receptor 5 signaling pathway	2	66	0.0970242	0.00423856	0.00900112	["Irak2","Myd88"]
GO:0043122	7	regulation of I-kappaB kinase/NF-kappaB signaling	3	224	0.329294	0.00428936	0.00908405	["Ikbke","Myd88","Stat1"]
GO:0032642	6	regulation of chemokine production	2	67	0.0984943	0.00436498	0.00919381	["Il6","Myd88"]
GO:0045669	7	positive regulation of osteoblast differentiation	2	67	0.0984943	0.00436498	0.00919381	["Il6","Suco"]
GO:0033143	6	regulation of intracellular steroid hormone receptor signaling pathway	2	68	0.0999644	0.00449313	0.00943802	["Ncoa3","Nr3c1"]
GO:0045596	6	negative regulation of cell differentiation	5	753	1.10696	0.00456242	0.0095576	["Id3","Il6","Med14","Ncor2","Stat1"]
GO:0002449	5	lymphocyte mediated immunity	2	69	0.101434	0.00462302	0.00965836	["Fas","Myd88"]
GO:0007178	8	transmembrane receptor protein serine/threonine kinase signaling pathway	3	231	0.339585	0.00467344	0.00973738	["Myd88","Ncor2","Trps1"]
GO:0042742	5	defense response to bacterium	3	234	0.343995	0.00484423	0.0100391	["Il6","Irf8","Myd88"]
GO:0060249	5	anatomical structure homeostasis	3	234	0.343995	0.00484423	0.0100391	["Ctss","Il6","Il7"]
GO:0006367	8	transcription initiation from RNA polymerase II promoter	3	237	0.348405	0.00501876	0.010373	["Med14","Ncor2","Nr3c1"]
GO:0044092	4	negative regulation of molecular function	6	1114	1.63765	0.00515709	0.0106078	["Fas","Id3","Il6","Il7","Irak2","Psen2"]
GO:0034162	8	toll-like receptor 9 signaling pathway	2	73	0.107315	0.00515979	0.0106078	["Irak2","Myd88"]
GO:0042110	5	T cell activation	3	241	0.354285	0.00525734	0.0107796	["Il6","Psen2","Tcf3"]
GO:0071391	7	cellular response to estrogen stimulus	2	74	0.108785	0.00529826	0.0108348	["Fas","Ncoa3"]
GO:0070489	4	T cell aggregation	3	242	0.355756	0.00531804	0.0108466	["Il6","Psen2","Tcf3"]
GO:0002690	7	positive regulation of leukocyte chemotaxis	2	75	0.110255	0.00543844	0.0110385	["Cxcl1","Il6"]
GO:0071593	7	lymphocyte aggregation	3	244	0.358696	0.00544071	0.0110385	["Il6","Psen2","Tcf3"]
GO:0051345	6	positive regulation of hydrolase activity	5	794	1.16723	0.00570212	0.011433	["Bcar3","Cd14","Fas","Ly96","Stat1"]
GO:0002460	5	adaptive immune response based on somatic recombination of immune receptors built from immunoglobulin superfamily domains	2	77	0.113195	0.00572388	0.011433	["Fas","Myd88"]
GO:0032481	7	positive regulation of type I interferon production	2	77	0.113195	0.00572388	0.011433	["Ifih1","Myd88"]
GO:0045582	9	positive regulation of T cell differentiation	2	77	0.113195	0.00572388	0.011433	["Il6","Il7"]
GO:0071385	8	cellular response to glucocorticoid stimulus	2	77	0.113195	0.00572388	0.011433	["Il6","Nr3c1"]
GO:1903051	9	negative regulation of proteolysis involved in cellular protein catabolic process	2	77	0.113195	0.00572388	0.011433	["Psen2","Smarcc1"]
GO:0070486	6	leukocyte aggregation	3	250	0.367516	0.00581893	0.0115929	["Il6","Psen2","Tcf3"]
GO:0031644	6	regulation of neurological system process	2	78	0.114665	0.00586913	0.0116329	["Ctss","Il6"]
GO:0050830	6	defense response to Gram-positive bacterium	2	78	0.114665	0.00586913	0.0116329	["Il6","Myd88"]
GO:0010467	5	gene expression	5	804	1.18193	0.00600826	0.0118287	["Fas","Med14","Ncor2","Nr3c1","Rars"]
GO:0009266	4	response to temperature stimulus	3	253	0.371926	0.00601384	0.0118287	["Cd14","Cxcl1","Il6"]
GO:0071345	6	cellular response to cytokine stimulus	3	253	0.371926	0.00601384	0.0118287	["Fas","Il6","Stat1"]
GO:0023014	4	signal transduction by protein phosphorylation	3	255	0.374866	0.00614593	0.0120579	["Ikbke","Irak2","Myd88"]
GO:2000648	7	positive regulation of stem cell proliferation	2	81	0.119075	0.00631497	0.0123581	["Cxcl1","Stat1"]
GO:0071384	7	cellular response to corticosteroid stimulus	2	82	0.120545	0.00646692	0.0125918	["Il6","Nr3c1"]
GO:1903363	8	negative regulation of cellular protein catabolic process	2	82	0.120545	0.00646692	0.0125918	["Psen2","Smarcc1"]
GO:0016568	5	chromatin modification	4	514	0.755613	0.00656973	0.0127598	["Ncoa3","Nr3c1","Smarcc1","Tcf3"]
GO:0043270	6	positive regulation of ion transport	3	262	0.385157	0.00662195	0.0127969	["Ctss","Cxcl1","Nr3c1"]
GO:0045927	5	positive regulation of growth	3	262	0.385157	0.00662195	0.0127969	["Il7","Ncoa3","Nr3c1"]
GO:0044702	3	single organism reproductive process	6	1175	1.72733	0.00666602	0.01285	["Cep131","Fas","Ncoa3","Ncor2","Prdm1","Smarcc1"]
GO:0002526	6	acute inflammatory response	2	84	0.123485	0.00677581	0.0129968	["Cxcl1","Il6"]
GO:1901655	6	cellular response to ketone	2	84	0.123485	0.00677581	0.0129968	["Il6","Nr3c1"]
GO:0023057	5	negative regulation of signaling	6	1182	1.73762	0.00685789	0.0131217	["Il6","Il7","Nr3c1","Prdm1","Psen2","Stat1"]
GO:0030900	4	forebrain development	2	85	0.124955	0.00693274	0.0132321	["Ncor2","Psen2"]
GO:0006915	6	apoptotic process	5	834	1.22603	0.00699672	0.0133213	["Cd14","Fas","Il6","Ly96","Stat1"]
GO:0010648	6	negative regulation of cell communication	6	1190	1.74938	0.00708212	0.0134024	["Il6","Il7","Nr3c1","Prdm1","Psen2","Stat1"]
GO:0006606	5	protein import into nucleus	2	86	0.126426	0.00709131	0.0134024	["Kpna3","Trps1"]
GO:1902593	5	single-organism nuclear import	2	86	0.126426	0.00709131	0.0134024	["Kpna3","Trps1"]
GO:0097529	4	myeloid leukocyte migration	2	87	0.127896	0.00725153	0.0136718	["Cxcl1","Il6"]
GO:0018205	8	peptidyl-lysine modification	3	272	0.399857	0.00733934	0.0138037	["Ifih1","Ncoa3","Tcf3"]
GO:0071356	7	cellular response to tumor necrosis factor	2	88	0.129366	0.00741339	0.013895	["Fas","Il6"]
GO:0031399	7	regulation of protein modification process	7	1592	2.34034	0.00742385	0.013895	["Bcar3","Il6","Irak2","Myd88","Ncor2","Psen2","Trps1"]
GO:0006352	7	DNA-templated transcription, initiation	3	275	0.404268	0.00756321	0.0141216	["Med14","Ncor2","Nr3c1"]
GO:0002688	6	regulation of leukocyte chemotaxis	2	90	0.132306	0.007742	0.014386	["Cxcl1","Il6"]
GO:0051170	8	nuclear import	2	90	0.132306	0.007742	0.014386	["Kpna3","Trps1"]
GO:0046620	5	regulation of organ growth	2	92	0.135246	0.0080771	0.0149458	["Il7","Nr3c1"]
GO:0012501	5	programmed cell death	5	864	1.27014	0.00809497	0.0149458	["Cd14","Fas","Il6","Ly96","Stat1"]
GO:0007159	5	leukocyte cell-cell adhesion	3	282	0.414558	0.00810128	0.0149458	["Il6","Psen2","Tcf3"]
GO:2000379	7	positive regulation of reactive oxygen species metabolic process	2	93	0.136716	0.00824707	0.0151785	["Cxcl1","Il6"]
GO:0043255	6	regulation of carbohydrate biosynthetic process	2	94	0.138186	0.00841866	0.0154575	["Il6","Nr3c1"]
GO:0045778	6	positive regulation of ossification	2	96	0.141126	0.00876664	0.0160583	["Il6","Suco"]
GO:0050727	6	regulation of inflammatory response	3	291	0.427789	0.00882567	0.0161282	["Ctss","Il6","Myd88"]
GO:0051149	7	positive regulation of muscle cell differentiation	2	97	0.142596	0.00894302	0.0163041	["Nr3c1","Tcf3"]
GO:0016573	5	histone acetylation	2	98	0.144066	0.009121	0.0165505	["Ncoa3","Tcf3"]
GO:0051403	6	stress-activated MAPK cascade	2	98	0.144066	0.009121	0.0165505	["Irak2","Myd88"]
GO:0060284	6	regulation of cell development	5	893	1.31277	0.00926663	0.0167736	["Il6","Nr3c1","Pdlim5","Stat1","Tcf3"]
GO:0043154	9	negative regulation of cysteine-type endopeptidase activity involved in apoptotic process	2	99	0.145536	0.00930056	0.0167736	["Fas","Il6"]
GO:0007167	7	enzyme linked receptor protein signaling pathway	5	894	1.31424	0.00930903	0.0167736	["Myd88","Ncor2","Psen2","Smarcc1","Trps1"]
GO:0051336	5	regulation of hydrolase activity	6	1263	1.85669	0.00938373	0.0168689	["Bcar3","Cd14","Fas","Il6","Ly96","Stat1"]
GO:0042327	9	positive regulation of phosphorylation	5	898	1.32012	0.00947997	0.0169661	["Bcar3","Il6","Irak2","Myd88","Vac14"]
GO:0071260	5	cellular response to mechanical stimulus	2	100	0.147006	0.0094817	0.0169661	["Fas","Myd88"]
GO:0032675	6	regulation of interleukin-6 production	2	101	0.148476	0.00966441	0.0172133	["Il6","Myd88"]
GO:2000117	9	negative regulation of cysteine-type endopeptidase activity	2	101	0.148476	0.00966441	0.0172133	["Fas","Il6"]
GO:0043009	6	chordate embryonic development	3	302	0.443959	0.00976138	0.0173461	["Fas","Ncor2","Prdm1"]
GO:0008219	4	cell death	5	906	1.33188	0.0098284	0.0174212	["Cd14","Fas","Il6","Ly96","Stat1"]
GO:2001237	8	negative regulation of extrinsic apoptotic signaling pathway	2	102	0.149947	0.0098487	0.0174212	["Il7","Psen2"]
GO:0034109	5	homotypic cell-cell adhesion	3	304	0.4469	0.00993751	0.0175381	["Il6","Psen2","Tcf3"]
GO:0018393	10	internal peptidyl-lysine acetylation	2	103	0.151417	0.0100346	0.017669	["Ncoa3","Tcf3"]
GO:0016265	3	death	5	914	1.34364	0.0101857	0.0178769	["Cd14","Fas","Il6","Ly96","Stat1"]
GO:0032680	7	regulation of tumor necrosis factor production	2	104	0.152887	0.010222	0.0178769	["Cd14","Myd88"]
GO:0034614	6	cellular response to reactive oxygen species	2	104	0.152887	0.010222	0.0178769	["Fas","Il6"]
GO:0045664	8	regulation of neuron differentiation	4	585	0.859988	0.0102619	0.0179062	["Il6","Nr3c1","Pdlim5","Tcf3"]
GO:0009792	5	embryo development ending in birth or egg hatching	3	309	0.45425	0.010386	0.0180441	["Fas","Ncor2","Prdm1"]
GO:0001959	6	regulation of cytokine-mediated signaling pathway	2	105	0.154357	0.0104109	0.0180441	["Irak2","Stat1"]
GO:0018394	9	peptidyl-lysine acetylation	2	105	0.154357	0.0104109	0.0180441	["Ncoa3","Tcf3"]
GO:0050729	7	positive regulation of inflammatory response	2	106	0.155827	0.0106015	0.0183332	["Ctss","Il6"]
GO:0033138	10	positive regulation of peptidyl-serine phosphorylation	2	107	0.157297	0.0107935	0.0185822	["Bcar3","Il6"]
GO:1903555	6	regulation of tumor necrosis factor superfamily cytokine production	2	107	0.157297	0.0107935	0.0185822	["Cd14","Myd88"]
GO:0030595	4	leukocyte chemotaxis	2	108	0.158767	0.0109872	0.0188316	["Cxcl1","Il6"]
GO:0042035	6	regulation of cytokine biosynthetic process	2	108	0.158767	0.0109872	0.0188316	["Il6","Myd88"]
GO:0043254	5	regulation of protein complex assembly	3	320	0.470421	0.0114137	0.0195195	["Fas","Irf8","Psen2"]
GO:0006475	9	internal protein amino acid acetylation	2	111	0.163177	0.0115772	0.0195825	["Ncoa3","Tcf3"]
GO:0010469	4	regulation of receptor activity	2	111	0.163177	0.0115772	0.0195825	["Ncoa3","Psen2"]
GO:0060759	5	regulation of response to cytokine stimulus	2	111	0.163177	0.0115772	0.0195825	["Irak2","Stat1"]
GO:0072091	6	regulation of stem cell proliferation	2	111	0.163177	0.0115772	0.0195825	["Cxcl1","Stat1"]
GO:0097285	7	cell-type specific apoptotic process	2	111	0.163177	0.0115772	0.0195825	["Fas","Il6"]
GO:0010906	7	regulation of glucose metabolic process	2	113	0.166117	0.0119782	0.0201725	["Il6","Nr3c1"]
GO:0045598	6	regulation of fat cell differentiation	2	113	0.166117	0.0119782	0.0201725	["Il6","Ncor2"]
GO:0002687	6	positive regulation of leukocyte migration	2	114	0.167587	0.012181	0.0204694	["Cxcl1","Il6"]
GO:0051093	5	negative regulation of developmental process	5	959	1.40979	0.0123645	0.0207327	["Id3","Il6","Med14","Ncor2","Stat1"]
GO:0048608	4	reproductive structure development	3	332	0.488061	0.0126001	0.0210819	["Ncoa3","Prdm1","Smarcc1"]
GO:0016032	4	viral process	4	626	0.92026	0.0129092	0.021506	["Ifih1","Kpna3","Stat1","Vac14"]
GO:0044403	4	symbiosis, encompassing mutualism through parasitism	4	626	0.92026	0.0129092	0.021506	["Ifih1","Kpna3","Stat1","Vac14"]
GO:0050921	6	positive regulation of chemotaxis	2	118	0.173468	0.0130071	0.0215822	["Cxcl1","Il6"]
GO:0002009	5	morphogenesis of an epithelium	3	336	0.493942	0.0130107	0.0215822	["Il6","Ncoa3","Nr3c1"]
GO:0042325	8	regulation of phosphorylation	6	1356	1.99341	0.0130464	0.021595	["Bcar3","Il6","Irak2","Myd88","Psen2","Vac14"]
GO:0040011	2	locomotion	5	973	1.43037	0.013103	0.0216423	["Cxcl1","Il6","Kpna3","Psen2","Stat1"]
GO:0017038	4	protein import	2	119	0.174938	0.0132174	0.0217848	["Kpna3","Trps1"]
GO:0044764	3	multi-organism cellular process	4	631	0.92761	0.0132593	0.0218073	["Ifih1","Kpna3","Stat1","Vac14"]
GO:0007568	4	aging	3	340	0.499822	0.013429	0.0219932	["Fas","Il6","Nr3c1"]
GO:0042177	7	negative regulation of protein catabolic process	2	120	0.176408	0.0134292	0.0219932	["Psen2","Smarcc1"]
GO:0045666	7	positive regulation of neuron differentiation	3	343	0.504232	0.0137478	0.0224673	["Il6","Nr3c1","Tcf3"]
GO:0006473	8	protein acetylation	2	124	0.182288	0.0142911	0.0231593	["Ncoa3","Tcf3"]
GO:0034504	7	protein localization to nucleus	2	124	0.182288	0.0142911	0.0231593	["Kpna3","Trps1"]
GO:0045580	8	regulation of T cell differentiation	2	124	0.182288	0.0142911	0.0231593	["Il6","Il7"]
GO:0051250	7	negative regulation of lymphocyte activation	2	124	0.182288	0.0142911	0.0231593	["Fas","Prdm1"]
GO:0044707	3	single-multicellular organism process	13	4823	7.09012	0.0148842	0.0240701	["Cep131","Ctss","Fas","Id3","Il6","Med14","Ncoa3","Ncor2","Nr3c1","Prdm1","Psen2","Stat1","Suco"]
GO:0044710	3	single-organism metabolic process	12	4295	6.31393	0.0153748	0.0248025	["Acot7","Ctss","Ikbke","Irak2","Myd88","Ncoa3","Ncor2","Nr3c1","Rars","Tcf3","Uba7","Vac14"]
GO:0006275	7	regulation of DNA replication	2	129	0.189638	0.0154013	0.0248025	["Id3","Il6"]
GO:0030856	6	regulation of epithelial cell differentiation	2	130	0.191108	0.0156277	0.0251148	["Ncoa3","Stat1"]
GO:0031098	5	stress-activated protein kinase signaling cascade	2	131	0.192578	0.0158556	0.0253943	["Irak2","Myd88"]
GO:1903532	6	positive regulation of secretion by cell	3	362	0.532163	0.0158673	0.0253943	["Cd14","Il6","Nr3c1"]
GO:0050707	6	regulation of cytokine secretion	2	133	0.195519	0.0163155	0.0259827	["Cd14","Il6"]
GO:0071248	6	cellular response to metal ion	2	133	0.195519	0.0163155	0.0259827	["Fas","Nr3c1"]
GO:0046649	4	lymphocyte activation	3	366	0.538043	0.0163358	0.0259827	["Il6","Psen2","Tcf3"]
GO:0048634	6	regulation of muscle organ development	2	134	0.196989	0.0165476	0.0262656	["Il6","Nr3c1"]
GO:0032501	2	multicellular organismal process	13	4894	7.19449	0.0167751	0.0265273	["Cep131","Ctss","Fas","Id3","Il6","Med14","Ncoa3","Ncor2","Nr3c1","Prdm1","Psen2","Stat1","Suco"]
GO:0033135	9	regulation of peptidyl-serine phosphorylation	2	135	0.198459	0.0167812	0.0265273	["Bcar3","Il6"]
GO:0010562	7	positive regulation of phosphorus metabolic process	5	1050	1.54357	0.0177087	0.027799	["Bcar3","Il6","Irak2","Myd88","Vac14"]
GO:0045937	8	positive regulation of phosphate metabolic process	5	1050	1.54357	0.0177087	0.027799	["Bcar3","Il6","Irak2","Myd88","Vac14"]
GO:0043433	5	negative regulation of sequence-specific DNA binding transcription factor activity	2	139	0.204339	0.0177295	0.027799	["Id3","Irak2"]
GO:0050773	7	regulation of dendrite development	2	139	0.204339	0.0177295	0.027799	["Nr3c1","Pdlim5"]
GO:0001894	6	tissue homeostasis	2	140	0.205809	0.0179701	0.0281191	["Ctss","Il7"]
GO:0008285	6	negative regulation of cell proliferation	4	693	1.01875	0.0181162	0.0282905	["Cxcl1","Il6","Prdm1","Stat1"]
GO:0051592	6	response to calcium ion	2	141	0.207279	0.018212	0.0283829	["Il6","Nr3c1"]
GO:0044087	4	regulation of cellular component biogenesis	4	695	1.02169	0.0182891	0.0284457	["Fas","Irf8","Pdlim5","Psen2"]
GO:0009968	6	negative regulation of signal transduction	5	1060	1.55827	0.0183771	0.0285251	["Il7","Nr3c1","Prdm1","Psen2","Stat1"]
GO:0002064	5	epithelial cell development	2	145	0.213159	0.0191938	0.0296144	["Myd88","Prdm1"]
GO:0032434	10	regulation of proteasomal ubiquitin-dependent protein catabolic process	2	145	0.213159	0.0191938	0.0296144	["Psen2","Smarcc1"]
GO:0048520	6	positive regulation of behavior	2	145	0.213159	0.0191938	0.0296144	["Cxcl1","Il6"]
GO:0006979	4	response to oxidative stress	3	390	0.573325	0.0193107	0.0297354	["Fas","Il6","Stat1"]
GO:0002695	6	negative regulation of leukocyte activation	2	146	0.214629	0.0194427	0.0298791	["Fas","Prdm1"]
GO:0002685	5	regulation of leukocyte migration	2	148	0.217569	0.0199445	0.0305485	["Cxcl1","Il6"]
GO:0051047	6	positive regulation of secretion	3	395	0.580675	0.019966	0.0305485	["Cd14","Il6","Nr3c1"]
GO:0019725	4	cellular homeostasis	4	715	1.0511	0.0200758	0.0305485	["Cxcl1","Fas","Il6","Psen2"]
GO:0044419	3	interspecies interaction between organisms	4	715	1.0511	0.0200758	0.0305485	["Ifih1","Kpna3","Stat1","Vac14"]
GO:0050767	7	regulation of neurogenesis	4	715	1.0511	0.0200758	0.0305485	["Il6","Nr3c1","Pdlim5","Tcf3"]
GO:0031401	8	positive regulation of protein modification process	5	1088	1.59943	0.0203382	0.0308869	["Bcar3","Il6","Irak2","Myd88","Ncor2"]
GO:0006338	6	chromatin remodeling	2	153	0.22492	0.0212229	0.0321043	["Nr3c1","Smarcc1"]
GO:0048167	4	regulation of synaptic plasticity	2	153	0.22492	0.0212229	0.0321043	["Nr3c1","Psen2"]
GO:0003013	5	circulatory system process	2	154	0.22639	0.0214826	0.0323741	["Nr3c1","Stat1"]
GO:0003006	3	developmental process involved in reproduction	4	730	1.07315	0.021485	0.0323741	["Fas","Ncoa3","Prdm1","Smarcc1"]
GO:0031330	7	negative regulation of cellular catabolic process	2	155	0.22786	0.0217436	0.0325733	["Psen2","Smarcc1"]
GO:0043902	5	positive regulation of multi-organism process	2	155	0.22786	0.0217436	0.0325733	["Cxcl1","Ly96"]
GO:1903036	6	positive regulation of response to wounding	2	155	0.22786	0.0217436	0.0325733	["Ctss","Il6"]
GO:0048568	4	embryonic organ development	2	156	0.22933	0.022006	0.0329026	["Id3","Prdm1"]
GO:0043543	7	protein acylation	2	157	0.2308	0.0222697	0.0331927	["Ncoa3","Tcf3"]
GO:1903034	6	regulation of response to wounding	3	412	0.605666	0.0222859	0.0331927	["Ctss","Il6","Myd88"]
GO:0031334	6	positive regulation of protein complex assembly	2	159	0.23374	0.022801	0.0338946	["Fas","Irf8"]
GO:0050920	5	regulation of chemotaxis	2	161	0.23668	0.0233376	0.0344933	["Cxcl1","Il6"]
GO:0060326	5	cell chemotaxis	2	161	0.23668	0.0233376	0.0344933	["Cxcl1","Il6"]
GO:2000377	6	regulation of reactive oxygen species metabolic process	2	161	0.23668	0.0233376	0.0344933	["Cxcl1","Il6"]
GO:0048729	4	tissue morphogenesis	3	420	0.617427	0.0234269	0.0345592	["Il6","Ncoa3","Nr3c1"]
GO:0006959	4	humoral immune response	2	162	0.23815	0.0236079	0.0347598	["Il6","Il7"]
GO:0050866	6	negative regulation of cell activation	2	164	0.241091	0.0241523	0.0354938	["Fas","Prdm1"]
GO:0033554	4	cellular response to stress	6	1559	2.29183	0.0243806	0.0356257	["Fas","Ikbke","Il6","Irak2","Myd88","Uba7"]
GO:0007219	7	Notch signaling pathway	2	165	0.242561	0.0244264	0.0356257	["Ncor2","Psen2"]
GO:0030307	6	positive regulation of cell growth	2	165	0.242561	0.0244264	0.0356257	["Ncoa3","Nr3c1"]
GO:0048639	6	positive regulation of developmental growth	2	165	0.242561	0.0244264	0.0356257	["Il7","Nr3c1"]
GO:0001822	4	kidney development	2	167	0.245501	0.0249786	0.036226	["Ctss","Id3"]
GO:0010675	6	regulation of cellular carbohydrate metabolic process	2	167	0.245501	0.0249786	0.036226	["Il6","Nr3c1"]
GO:0034599	5	cellular response to oxidative stress	2	167	0.245501	0.0249786	0.036226	["Fas","Il6"]
GO:0043549	6	regulation of kinase activity	4	766	1.12607	0.0251133	0.0363531	["Il6","Irak2","Psen2","Vac14"]
GO:0050769	7	positive regulation of neurogenesis	3	432	0.635068	0.0251976	0.036407	["Il6","Nr3c1","Tcf3"]
GO:0002699	6	positive regulation of immune effector process	2	168	0.246971	0.0252566	0.0364241	["Cxcl1","Il6"]
GO:0043123	8	positive regulation of I-kappaB kinase/NF-kappaB signaling	2	171	0.251381	0.0260982	0.0375678	["Ikbke","Myd88"]
GO:0051222	6	positive regulation of protein transport	3	442	0.649768	0.0267274	0.038402	["Cd14","Cep131","Il6"]
GO:0006109	6	regulation of carbohydrate metabolic process	2	177	0.260201	0.0278155	0.039761	["Il6","Nr3c1"]
GO:0061138	5	morphogenesis of a branching epithelium	2	177	0.260201	0.0278155	0.039761	["Il6","Ncoa3"]
GO:0045321	3	leukocyte activation	3	449	0.660059	0.0278276	0.039761	["Il6","Psen2","Tcf3"]
GO:0043410	8	positive regulation of MAPK cascade	3	454	0.667409	0.0286282	0.0408295	["Il6","Irak2","Myd88"]
GO:0048598	4	embryonic morphogenesis	3	456	0.670349	0.0289519	0.0412151	["Ncoa3","Psen2","Tcf3"]
GO:0019220	7	regulation of phosphate metabolic process	6	1626	2.39032	0.0292605	0.0415779	["Bcar3","Il6","Irak2","Myd88","Psen2","Vac14"]
GO:0050870	8	positive regulation of T cell activation	2	184	0.270492	0.0298752	0.0423735	["Il6","Il7"]
GO:0051960	6	regulation of nervous system development	4	812	1.19369	0.0302654	0.042788	["Il6","Nr3c1","Pdlim5","Tcf3"]
GO:0051174	6	regulation of phosphorus metabolic process	6	1639	2.40944	0.0302782	0.042788	["Bcar3","Il6","Irak2","Myd88","Psen2","Vac14"]
GO:0034112	8	positive regulation of homotypic cell-cell adhesion	2	188	0.276372	0.031079	0.0438395	["Il6","Il7"]
GO:1903039	8	positive regulation of leukocyte cell-cell adhesion	2	189	0.277842	0.0313829	0.0441876	["Il6","Il7"]
GO:0030099	6	myeloid cell differentiation	2	190	0.279312	0.031688	0.0445361	["Irf8","Psen2"]
GO:0016337	4	single organismal cell-cell adhesion	3	476	0.699751	0.032297	0.0453095	["Il6","Psen2","Tcf3"]
GO:0009895	6	negative regulation of catabolic process	2	195	0.286663	0.0332314	0.046536	["Psen2","Smarcc1"]
GO:0014074	5	response to purine-containing compound	2	196	0.288133	0.0335436	0.0468036	["Il6","Stat1"]
GO:0031175	5	neuron projection development	2	196	0.288133	0.0335436	0.0468036	["Fas","Il6"]
GO:0044057	5	regulation of system process	3	488	0.717391	0.0343981	0.0479094	["Ctss","Il6","Nr3c1"]
GO:0043933	4	macromolecular complex subunit organization	7	2158	3.1724	0.0345646	0.0480547	["Fas","Kpna3","Ncoa3","Ncor2","Nr3c1","Smarcc1","Tcf3"]
GO:0000165	5	MAPK cascade	2	202	0.296953	0.035441	0.0491848	["Irak2","Myd88"]
GO:0071241	5	cellular response to inorganic substance	2	203	0.298423	0.0357613	0.0495403	["Fas","Nr3c1"]
GO:1902533	7	positive regulation of intracellular signal transduction	4	857	1.25984	0.0358772	0.0496119	["Ikbke","Il6","Irak2","Myd88"]
GO:0051962	6	positive regulation of nervous system development	3	497	0.730622	0.03602	0.0497205	["Il6","Nr3c1","Tcf3"]
GO:0098602	3	single organism cell adhesion	3	501	0.736502	0.0367535	0.0506426	["Il6","Psen2","Tcf3"]
GO:0001934	9	positive regulation of protein phosphorylation	4	867	1.27455	0.0372019	0.0511692	["Bcar3","Il6","Irak2","Myd88"]
GO:0043086	5	negative regulation of catalytic activity	4	868	1.27602	0.037336	0.0512624	["Fas","Il6","Il7","Psen2"]
GO:0001932	8	regulation of protein phosphorylation	5	1279	1.88021	0.0374652	0.0513486	["Bcar3","Il6","Irak2","Myd88","Psen2"]
GO:0050714	7	positive regulation of protein secretion	2	213	0.313124	0.0390257	0.0533927	["Cd14","Il6"]
GO:0007399	5	nervous system development	3	514	0.755613	0.039191	0.0535241	["Cxcl1","Smarcc1","Tcf3"]
GO:0006469	8	negative regulation of protein kinase activity	2	214	0.314594	0.0393583	0.0536577	["Il6","Psen2"]
GO:0044267	5	cellular protein metabolic process	9	3240	4.76301	0.0398749	0.0542664	["Ifih1","Ikbke","Irak2","Myd88","Ncoa3","Psen2","Rars","Tcf3","Uba7"]
GO:0009636	4	response to toxic substance	2	218	0.320474	0.0406994	0.0551941	["Fas","Il6"]
GO:2001234	7	negative regulation of apoptotic signaling pathway	2	218	0.320474	0.0406994	0.0551941	["Il7","Psen2"]
GO:0043200	5	response to amino acid	2	219	0.321944	0.0410374	0.055555	["Fas","Il6"]
GO:0061136	9	regulation of proteasomal protein catabolic process	2	220	0.323414	0.0413765	0.0559161	["Psen2","Smarcc1"]
GO:0022604	5	regulation of cell morphogenesis	3	526	0.773254	0.0415133	0.0560031	["Il6","Pdlim5","Stat1"]
GO:0010720	7	positive regulation of cell development	3	530	0.779134	0.0423027	0.0569343	["Il6","Nr3c1","Tcf3"]
GO:0051338	5	regulation of transferase activity	4	904	1.32894	0.0423509	0.0569343	["Il6","Irak2","Psen2","Vac14"]
GO:0022409	7	positive regulation of cell-cell adhesion	2	224	0.329294	0.0427434	0.0573623	["Il6","Il7"]
GO:0050730	9	regulation of peptidyl-tyrosine phosphorylation	2	227	0.333705	0.0437798	0.0586513	["Il6","Psen2"]
GO:0048585	5	negative regulation of response to stimulus	5	1339	1.96842	0.0442775	0.0592154	["Il7","Nr3c1","Prdm1","Psen2","Stat1"]
GO:0045765	6	regulation of angiogenesis	2	229	0.336645	0.0444759	0.0592757	["Il6","Stat1"]
GO:1901654	5	response to ketone	2	229	0.336645	0.0444759	0.0592757	["Il6","Nr3c1"]
GO:0033673	7	negative regulation of kinase activity	2	230	0.338115	0.0448256	0.0596388	["Il6","Psen2"]
GO:0006913	7	nucleocytoplasmic transport	2	231	0.339585	0.0451762	0.0600021	["Kpna3","Trps1"]
GO:0050795	5	regulation of behavior	2	235	0.345465	0.0465892	0.0617727	["Cxcl1","Il6"]
GO:0051169	6	nuclear transport	2	236	0.346935	0.046945	0.0621379	["Kpna3","Trps1"]
GO:0050900	3	leukocyte migration	2	240	0.352815	0.0483784	0.0639256	["Cxcl1","Il6"]
GO:0045926	5	negative regulation of growth	2	241	0.354285	0.0487392	0.0642925	["Irf8","Myd88"]
GO:0090316	6	positive regulation of intracellular protein transport	2	243	0.357226	0.0494639	0.0651373	["Cep131","Il6"]

## Sheet: MyD88 Independent
ID	Level	Title	Number of hits	Group size	Expected hits	P-value	Adjusted P-value	Hit names
GO:0010557	7	positive regulation of macromolecule biosynthetic process	11	1674	2.01345	1.63413e-06	0.00038602	["Acvr1b","Atf2","Il12b","Il3","Med12","Polr2c","Psmc6","Smad1","Smarca5","Smarcc1","Sub1"]
GO:0071824	5	protein-DNA complex subunit organization	5	179	0.215298	2.13454e-06	0.00038602	["Nap1l1","Nap1l4","Rpa2","Smarca5","Smarcc1"]
GO:0048522	5	positive regulation of cellular process	17	4765	5.73125	3.22568e-06	0.00038602	["Acvr1b","Atf2","Cxcl2","Flna","Il12b","Il3","Lcn2","Med12","Nap1l1","Ncor2","Plau","Polr2c","Psmc6","Smad1","Smarca5","Smarcc1","Sub1"]
GO:0031328	7	positive regulation of cellular biosynthetic process	11	1824	2.19387	3.79314e-06	0.00038602	["Acvr1b","Atf2","Il12b","Il3","Med12","Polr2c","Psmc6","Smad1","Smarca5","Smarcc1","Sub1"]
GO:0043170	4	macromolecule metabolic process	20	6877	8.27152	4.18636e-06	0.00038602	["Acvr1b","Atf2","Cct4","Fkbp3","Flna","Il12b","Med12","Nap1l1","Ncor2","Plau","Polr2c","Psmc6","Rars","Rpa2","Smad1","Smarca5","Smarcc1","Sub1","Upf1","Vrk1"]
GO:0009891	6	positive regulation of biosynthetic process	11	1859	2.23597	4.56467e-06	0.00038602	["Acvr1b","Atf2","Il12b","Il3","Med12","Polr2c","Psmc6","Smad1","Smarca5","Smarcc1","Sub1"]
GO:0009987	2	cellular process	26	12806	15.4028	5.5343e-06	0.00038602	["Acot7","Acvr1b","Atf2","Cct4","Cxcl2","Fkbp3","Flna","Il12b","Il3","Lcn2","Lemd3","Med12","Nap1l1","Nap1l4","Ncor2","Plau","Polr2c","Psmc6","Rars","Rpa2","Smad1","Smarca5","Smarcc1","Sub1","Upf1","Vrk1"]
GO:0010604	6	positive regulation of macromolecule metabolic process	13	2782	3.34613	5.83772e-06	0.00038602	["Acvr1b","Atf2","Il12b","Il3","Lcn2","Med12","Ncor2","Polr2c","Psmc6","Smad1","Smarca5","Smarcc1","Sub1"]
GO:0006325	4	chromatin organization	7	641	0.770982	8.0851e-06	0.000475224	["Atf2","Nap1l1","Nap1l4","Ncor2","Smarca5","Smarcc1","Vrk1"]
GO:0009059	5	macromolecule biosynthetic process	13	2917	3.50851	9.91426e-06	0.000524465	["Atf2","Flna","Med12","Nap1l1","Ncor2","Polr2c","Rars","Rpa2","Smad1","Smarca5","Smarcc1","Sub1","Upf1"]
GO:0031325	6	positive regulation of cellular metabolic process	13	2954	3.55301	1.1405e-05	0.000548477	["Acvr1b","Atf2","Il12b","Il3","Med12","Ncor2","Plau","Polr2c","Psmc6","Smad1","Smarca5","Smarcc1","Sub1"]
GO:0044238	3	primary metabolic process	21	8175	9.83272	1.39593e-05	0.000605633	["Acot7","Acvr1b","Atf2","Cct4","Fkbp3","Flna","Il12b","Med12","Nap1l1","Ncor2","Plau","Polr2c","Psmc6","Rars","Rpa2","Smad1","Smarca5","Smarcc1","Sub1","Upf1","Vrk1"]
GO:0009893	5	positive regulation of metabolic process	14	3604	4.33482	1.83255e-05	0.000605633	["Acvr1b","Atf2","Il12b","Il3","Lcn2","Med12","Ncor2","Plau","Polr2c","Psmc6","Smad1","Smarca5","Smarcc1","Sub1"]
GO:0043933	4	macromolecular complex subunit organization	11	2158	2.5956	1.91536e-05	0.000605633	["Atf2","Flna","Lcn2","Nap1l1","Nap1l4","Ncor2","Rpa2","Smad1","Smarca5","Smarcc1","Vrk1"]
GO:0045935	7	positive regulation of nucleobase-containing compound metabolic process	10	1744	2.09765	1.92513e-05	0.000605633	["Acvr1b","Atf2","Il3","Med12","Polr2c","Psmc6","Smad1","Smarca5","Smarcc1","Sub1"]
GO:0010556	6	regulation of macromolecule biosynthetic process	14	3626	4.36128	1.96843e-05	0.000605633	["Acvr1b","Atf2","Flna","Il12b","Il3","Med12","Ncor2","Polr2c","Psmc6","Smad1","Smarca5","Smarcc1","Sub1","Upf1"]
GO:0010628	7	positive regulation of gene expression	10	1757	2.11328	2.05428e-05	0.000605633	["Acvr1b","Atf2","Lcn2","Med12","Polr2c","Psmc6","Smad1","Smarca5","Smarcc1","Sub1"]
GO:0044260	4	cellular macromolecule metabolic process	18	6092	7.32733	2.06076e-05	0.000605633	["Acvr1b","Atf2","Cct4","Fkbp3","Flna","Med12","Nap1l1","Ncor2","Polr2c","Psmc6","Rars","Rpa2","Smad1","Smarca5","Smarcc1","Sub1","Upf1","Vrk1"]
GO:0051173	6	positive regulation of nitrogen compound metabolic process	10	1776	2.13614	2.25654e-05	0.000607197	["Acvr1b","Atf2","Il3","Med12","Polr2c","Psmc6","Smad1","Smarca5","Smarcc1","Sub1"]
GO:0006950	3	response to stress	13	3149	3.78755	2.30806e-05	0.000607197	["Atf2","Cxcl2","Il12b","Il3","Kpna4","Lcn2","Plau","Polr2c","Psmc6","Rpa2","Smad1","Smarca5","Upf1"]
GO:0048518	4	positive regulation of biological process	17	5484	6.59604	2.41042e-05	0.000607197	["Acvr1b","Atf2","Cxcl2","Flna","Il12b","Il3","Lcn2","Med12","Nap1l1","Ncor2","Plau","Polr2c","Psmc6","Smad1","Smarca5","Smarcc1","Sub1"]
GO:0071704	3	organic substance metabolic process	21	8475	10.1936	2.64832e-05	0.0006368	["Acot7","Acvr1b","Atf2","Cct4","Fkbp3","Flna","Il12b","Med12","Nap1l1","Ncor2","Plau","Polr2c","Psmc6","Rars","Rpa2","Smad1","Smarca5","Smarcc1","Sub1","Upf1","Vrk1"]
GO:0065004	6	protein-DNA complex assembly	4	153	0.184025	3.22258e-05	0.000684203	["Nap1l1","Nap1l4","Rpa2","Smarca5"]
GO:0034645	5	cellular macromolecule biosynthetic process	12	2748	3.30524	3.24732e-05	0.000684203	["Atf2","Flna","Med12","Nap1l1","Ncor2","Polr2c","Rars","Rpa2","Smad1","Smarcc1","Sub1","Upf1"]
GO:0044249	4	cellular biosynthetic process	14	3791	4.55974	3.31084e-05	0.000684203	["Acot7","Atf2","Flna","Med12","Nap1l1","Ncor2","Polr2c","Rars","Rpa2","Smad1","Smarca5","Smarcc1","Sub1","Upf1"]
GO:0034728	5	nucleosome organization	4	156	0.187634	3.47697e-05	0.000684203	["Nap1l1","Nap1l4","Smarca5","Smarcc1"]
GO:0010467	5	gene expression	7	804	0.967035	3.49215e-05	0.000684203	["Med12","Ncor2","Polr2c","Psmc6","Rars","Smarca5","Upf1"]
GO:0031326	6	regulation of cellular biosynthetic process	14	3838	4.61627	3.8198e-05	0.000697931	["Acvr1b","Atf2","Flna","Il12b","Il3","Med12","Ncor2","Polr2c","Psmc6","Smad1","Smarca5","Smarcc1","Sub1","Upf1"]
GO:1902680	8	positive regulation of RNA biosynthetic process	9	1494	1.79695	3.91074e-05	0.000697931	["Acvr1b","Atf2","Med12","Polr2c","Psmc6","Smad1","Smarca5","Smarcc1","Sub1"]
GO:0051716	3	cellular response to stimulus	12	2810	3.37981	4.06935e-05	0.000697931	["Atf2","Cxcl2","Il12b","Lcn2","Nap1l1","Plau","Polr2c","Psmc6","Rpa2","Smad1","Smarca5","Upf1"]
GO:0034641	4	cellular nitrogen compound metabolic process	15	4437	5.33673	4.08996e-05	0.000697931	["Acot7","Atf2","Flna","Med12","Nap1l1","Ncor2","Polr2c","Psmc6","Rars","Rpa2","Smad1","Smarca5","Smarcc1","Sub1","Upf1"]
GO:0009889	5	regulation of biosynthetic process	14	3890	4.67881	4.46328e-05	0.000737836	["Acvr1b","Atf2","Flna","Il12b","Il3","Med12","Ncor2","Polr2c","Psmc6","Smad1","Smarca5","Smarcc1","Sub1","Upf1"]
GO:0051254	7	positive regulation of RNA metabolic process	9	1532	1.84266	4.76617e-05	0.000764032	["Acvr1b","Atf2","Med12","Polr2c","Psmc6","Smad1","Smarca5","Smarcc1","Sub1"]
GO:0006139	4	nucleobase-containing compound metabolic process	14	3924	4.71971	4.93462e-05	0.000767769	["Acot7","Atf2","Flna","Med12","Nap1l1","Ncor2","Polr2c","Rars","Rpa2","Smad1","Smarca5","Smarcc1","Sub1","Upf1"]
GO:1901576	4	organic substance biosynthetic process	14	3936	4.73414	5.11127e-05	0.000772532	["Acot7","Atf2","Flna","Med12","Nap1l1","Ncor2","Polr2c","Rars","Rpa2","Smad1","Smarca5","Smarcc1","Sub1","Upf1"]
GO:0010468	6	regulation of gene expression	14	3959	4.76181	5.46567e-05	0.000789319	["Acvr1b","Atf2","Flna","Il3","Lcn2","Med12","Ncor2","Polr2c","Psmc6","Smad1","Smarca5","Smarcc1","Sub1","Upf1"]
GO:0044237	3	cellular metabolic process	20	8016	9.64148	5.52076e-05	0.000789319	["Acot7","Acvr1b","Atf2","Cct4","Fkbp3","Flna","Med12","Nap1l1","Ncor2","Plau","Polr2c","Psmc6","Rars","Rpa2","Smad1","Smarca5","Smarcc1","Sub1","Upf1","Vrk1"]
GO:0090304	5	nucleic acid metabolic process	13	3462	4.16402	6.44534e-05	0.000886062	["Atf2","Flna","Med12","Nap1l1","Ncor2","Polr2c","Rars","Rpa2","Smad1","Smarca5","Smarcc1","Sub1","Upf1"]
GO:0009058	3	biosynthetic process	14	4021	4.83638	6.5324e-05	0.000886062	["Acot7","Atf2","Flna","Med12","Nap1l1","Ncor2","Polr2c","Rars","Rpa2","Smad1","Smarca5","Smarcc1","Sub1","Upf1"]
GO:0044763	3	single-organism cellular process	22	9820	11.8113	6.77833e-05	0.000896434	["Acot7","Acvr1b","Atf2","Cct4","Cxcl2","Flna","Il12b","Il3","Lcn2","Lemd3","Med12","Ncor2","Plau","Polr2c","Psmc6","Rars","Rpa2","Smad1","Smarca5","Smarcc1","Upf1","Vrk1"]
GO:0048519	4	negative regulation of biological process	15	4697	5.64946	8.20908e-05	0.00105917	["Acvr1b","Atf2","Flna","Il12b","Il3","Lemd3","Med12","Ncor2","Plau","Polr2c","Psmc6","Rpa2","Smad1","Smarca5","Smarcc1"]
GO:0046483	4	heterocycle metabolic process	14	4115	4.94944	8.50403e-05	0.0010711	["Acot7","Atf2","Flna","Med12","Nap1l1","Ncor2","Polr2c","Rars","Rpa2","Smad1","Smarca5","Smarcc1","Sub1","Upf1"]
GO:0006725	4	cellular aromatic compound metabolic process	14	4145	4.98552	9.23599e-05	0.00113624	["Acot7","Atf2","Flna","Med12","Nap1l1","Ncor2","Polr2c","Rars","Rpa2","Smad1","Smarca5","Smarcc1","Sub1","Upf1"]
GO:0034654	5	nucleobase-containing compound biosynthetic process	11	2570	3.09114	9.79584e-05	0.00117773	["Acot7","Atf2","Flna","Med12","Ncor2","Polr2c","Rpa2","Smad1","Smarca5","Smarcc1","Sub1"]
GO:0060255	5	regulation of macromolecule metabolic process	16	5423	6.52267	0.000103571	0.00121754	["Acvr1b","Atf2","Flna","Il12b","Il3","Lcn2","Med12","Ncor2","Polr2c","Psmc6","Rpa2","Smad1","Smarca5","Smarcc1","Sub1","Upf1"]
GO:0071222	6	cellular response to lipopolysaccharide	4	208	0.250178	0.000106331	0.0012228	["Cxcl2","Il12b","Lcn2","Plau"]
GO:0019219	6	regulation of nucleobase-containing compound metabolic process	13	3642	4.38052	0.000110564	0.00123046	["Acvr1b","Atf2","Flna","Il3","Med12","Ncor2","Polr2c","Psmc6","Rpa2","Smad1","Smarca5","Smarcc1","Sub1"]
GO:0006807	3	nitrogen compound metabolic process	15	4818	5.79499	0.000111648	0.00123046	["Acot7","Atf2","Flna","Med12","Nap1l1","Ncor2","Polr2c","Psmc6","Rars","Rpa2","Smad1","Smarca5","Smarcc1","Sub1","Upf1"]
GO:0071219	5	cellular response to molecule of bacterial origin	4	217	0.261003	0.000125188	0.00133893	["Cxcl2","Il12b","Lcn2","Plau"]
GO:0018130	5	heterocycle biosynthetic process	11	2643	3.17895	0.000126553	0.00133893	["Acot7","Atf2","Flna","Med12","Ncor2","Polr2c","Rpa2","Smad1","Smarca5","Smarcc1","Sub1"]
GO:0019438	5	aromatic compound biosynthetic process	11	2650	3.18737	0.00012964	0.0013447	["Acot7","Atf2","Flna","Med12","Ncor2","Polr2c","Rpa2","Smad1","Smarca5","Smarcc1","Sub1"]
GO:0006974	5	cellular response to DNA damage stimulus	6	685	0.823904	0.000135144	0.00137389	["Atf2","Polr2c","Psmc6","Rpa2","Smarca5","Upf1"]
GO:0048523	5	negative regulation of cellular process	14	4294	5.16474	0.000137648	0.00137389	["Acvr1b","Atf2","Flna","Il12b","Il3","Lemd3","Med12","Ncor2","Polr2c","Psmc6","Rpa2","Smad1","Smarca5","Smarcc1"]
GO:0045639	7	positive regulation of myeloid cell differentiation	3	86	0.103439	0.000148576	0.00144445	["Acvr1b","Il12b","Il3"]
GO:0051171	5	regulation of nitrogen compound metabolic process	13	3751	4.51163	0.000150841	0.00144445	["Acvr1b","Atf2","Flna","Il3","Med12","Ncor2","Polr2c","Psmc6","Rpa2","Smad1","Smarca5","Smarcc1","Sub1"]
GO:0031323	5	regulation of cellular metabolic process	16	5591	6.72474	0.00015291	0.00144445	["Acvr1b","Atf2","Flna","Il12b","Il3","Med12","Ncor2","Plau","Polr2c","Psmc6","Rpa2","Smad1","Smarca5","Smarcc1","Sub1","Upf1"]
GO:0042523	10	positive regulation of tyrosine phosphorylation of Stat5 protein	2	16	0.0192445	0.00016545	0.00147134	["Il12b","Il3"]
GO:0022402	4	cell cycle process	7	1030	1.23886	0.000166052	0.00147134	["Acvr1b","Atf2","Flna","Il12b","Psmc6","Rpa2","Vrk1"]
GO:1901360	4	organic cyclic compound metabolic process	14	4368	5.25374	0.000166713	0.00147134	["Acot7","Atf2","Flna","Med12","Nap1l1","Ncor2","Polr2c","Rars","Rpa2","Smad1","Smarca5","Smarcc1","Sub1","Upf1"]
GO:0044271	5	cellular nitrogen compound biosynthetic process	11	2727	3.27998	0.00016814	0.00147134	["Acot7","Atf2","Flna","Med12","Ncor2","Polr2c","Rpa2","Smad1","Smarca5","Smarcc1","Sub1"]
GO:0007165	5	signal transduction	16	5637	6.78007	0.000169663	0.00147134	["Acvr1b","Atf2","Cxcl2","Flna","Il12b","Il3","Kpna4","Lcn2","Med12","Ncor2","Plau","Psmc6","Smad1","Smarcc1","Sub1","Vrk1"]
GO:0071216	4	cellular response to biotic stimulus	4	237	0.285059	0.000175636	0.00149857	["Cxcl2","Il12b","Lcn2","Plau"]
GO:1903047	5	mitotic cell cycle process	6	721	0.867204	0.000178654	0.00150012	["Acvr1b","Atf2","Flna","Psmc6","Rpa2","Vrk1"]
GO:0006357	8	regulation of transcription from RNA polymerase II promoter	9	1822	2.19146	0.000182526	0.00150869	["Acvr1b","Atf2","Med12","Ncor2","Psmc6","Smad1","Smarca5","Smarcc1","Sub1"]
GO:0045944	9	positive regulation of transcription from RNA polymerase II promoter	7	1054	1.26773	0.000191477	0.00155833	["Acvr1b","Atf2","Med12","Psmc6","Smad1","Smarcc1","Sub1"]
GO:1901362	5	organic cyclic compound biosynthetic process	11	2778	3.34132	0.000198753	0.00159304	["Acot7","Atf2","Flna","Med12","Ncor2","Polr2c","Rpa2","Smad1","Smarca5","Smarcc1","Sub1"]
GO:0008152	2	metabolic process	21	9566	11.5058	0.000216078	0.00170605	["Acot7","Acvr1b","Atf2","Cct4","Fkbp3","Flna","Il12b","Med12","Nap1l1","Ncor2","Plau","Polr2c","Psmc6","Rars","Rpa2","Smad1","Smarca5","Smarcc1","Sub1","Upf1","Vrk1"]
GO:0007166	6	cell surface receptor signaling pathway	13	3893	4.68242	0.000222288	0.00172927	["Acvr1b","Cxcl2","Flna","Il12b","Il3","Kpna4","Lcn2","Med12","Ncor2","Psmc6","Smad1","Smarcc1","Vrk1"]
GO:0019222	4	regulation of metabolic process	17	6481	7.79522	0.00023817	0.0017749	["Acvr1b","Atf2","Flna","Il12b","Il3","Lcn2","Med12","Ncor2","Plau","Polr2c","Psmc6","Rpa2","Smad1","Smarca5","Smarcc1","Sub1","Upf1"]
GO:0045893	8	positive regulation of transcription, DNA-templated	8	1469	1.76688	0.000238219	0.0017749	["Acvr1b","Atf2","Med12","Psmc6","Smad1","Smarca5","Smarcc1","Sub1"]
GO:1903508	9	positive regulation of nucleic acid-templated transcription	8	1469	1.76688	0.000238219	0.0017749	["Acvr1b","Atf2","Med12","Psmc6","Smad1","Smarca5","Smarcc1","Sub1"]
GO:0042522	9	regulation of tyrosine phosphorylation of Stat5 protein	2	20	0.0240556	0.000261187	0.001919	["Il12b","Il3"]
GO:0050793	4	regulation of developmental process	10	2374	2.8554	0.000265568	0.00192446	["Acvr1b","Flna","Il12b","Il3","Med12","Ncor2","Plau","Polr2c","Smad1","Vrk1"]
GO:0044699	2	single-organism process	24	12631	15.1923	0.000288505	0.00206242	["Acot7","Acvr1b","Atf2","Cct4","Cxcl2","Flna","Il12b","Il3","Kpna4","Lcn2","Lemd3","Med12","Nap1l1","Ncor2","Plau","Polr2c","Psmc6","Rars","Rpa2","Smad1","Smarca5","Smarcc1","Upf1","Vrk1"]
GO:0006352	7	DNA-templated transcription, initiation	4	275	0.330764	0.000309702	0.00218443	["Med12","Ncor2","Polr2c","Smarca5"]
GO:0097191	7	extrinsic apoptotic signaling pathway	3	114	0.137117	0.000341363	0.00237606	["Acvr1b","Il3","Lcn2"]
GO:0033554	4	cellular response to stress	8	1559	1.87513	0.000357498	0.00243469	["Atf2","Lcn2","Plau","Polr2c","Psmc6","Rpa2","Smarca5","Upf1"]
GO:2000112	7	regulation of cellular macromolecule biosynthetic process	12	3507	4.21815	0.00035899	0.00243469	["Acvr1b","Atf2","Flna","Il3","Med12","Ncor2","Psmc6","Smad1","Smarca5","Smarcc1","Sub1","Upf1"]
GO:0016070	5	RNA metabolic process	11	2979	3.58308	0.000370776	0.00248279	["Atf2","Flna","Med12","Ncor2","Polr2c","Rars","Smad1","Smarca5","Smarcc1","Sub1","Upf1"]
GO:0080090	5	regulation of primary metabolic process	15	5345	6.42886	0.000381772	0.00252447	["Acvr1b","Atf2","Flna","Il12b","Il3","Med12","Ncor2","Polr2c","Psmc6","Rpa2","Smad1","Smarca5","Smarcc1","Sub1","Upf1"]
GO:0042060	5	wound healing	3	126	0.15155	0.000457662	0.00297199	["Cxcl2","Plau","Smad1"]
GO:0050794	4	regulation of cellular process	22	10916	13.1295	0.000460687	0.00297199	["Acvr1b","Atf2","Cxcl2","Flna","Il12b","Il3","Kpna4","Lcn2","Lemd3","Med12","Nap1l1","Ncor2","Plau","Polr2c","Psmc6","Rpa2","Smad1","Smarca5","Smarcc1","Sub1","Upf1","Vrk1"]
GO:0002684	5	positive regulation of immune system process	6	873	1.05003	0.000499139	0.00315771	["Acvr1b","Atf2","Cxcl2","Il12b","Il3","Psmc6"]
GO:0006334	6	nucleosome assembly	3	130	0.156361	0.000501413	0.00315771	["Nap1l1","Nap1l4","Smarca5"]
GO:0065003	5	macromolecular complex assembly	7	1246	1.49866	0.000531116	0.00330542	["Flna","Lcn2","Nap1l1","Nap1l4","Rpa2","Smad1","Smarca5"]
GO:0032925	7	regulation of activin receptor signaling pathway	2	29	0.0348806	0.000554401	0.00338145	["Acvr1b","Lemd3"]
GO:0006366	7	transcription from RNA polymerase II promoter	6	891	1.07168	0.000556118	0.00338145	["Atf2","Flna","Med12","Polr2c","Smad1","Sub1"]
GO:0045595	5	regulation of cell differentiation	8	1691	2.0339	0.000617989	0.00371496	["Acvr1b","Flna","Il12b","Il3","Med12","Ncor2","Polr2c","Smad1"]
GO:0034622	6	cellular macromolecular complex assembly	5	595	0.715654	0.000640273	0.00380567	["Nap1l1","Nap1l4","Rpa2","Smad1","Smarca5"]
GO:2001141	7	regulation of RNA biosynthetic process	11	3215	3.86694	0.000722338	0.00424574	["Acvr1b","Atf2","Flna","Med12","Ncor2","Polr2c","Psmc6","Smad1","Smarca5","Smarcc1","Sub1"]
GO:0043902	5	positive regulation of multi-organism process	3	155	0.186431	0.000836197	0.00486097	["Acvr1b","Plau","Polr2c"]
GO:0000082	7	G1/S transition of mitotic cell cycle	3	157	0.188836	0.000867813	0.00493627	["Acvr1b","Psmc6","Rpa2"]
GO:0044843	6	cell cycle G1/S phase transition	3	157	0.188836	0.000867813	0.00493627	["Acvr1b","Psmc6","Rpa2"]
GO:0051252	6	regulation of RNA metabolic process	11	3317	3.98962	0.000945109	0.00531875	["Acvr1b","Atf2","Flna","Med12","Ncor2","Polr2c","Psmc6","Smad1","Smarca5","Smarcc1","Sub1"]
GO:0032774	6	RNA biosynthetic process	9	2282	2.74474	0.000974369	0.0054257	["Atf2","Flna","Med12","Ncor2","Polr2c","Smad1","Smarca5","Smarcc1","Sub1"]
GO:0044773	7	mitotic DNA damage checkpoint	2	39	0.0469084	0.00100438	0.00552975	["Atf2","Rpa2"]
GO:0050789	3	regulation of biological process	22	11418	13.7333	0.00101396	0.00552975	["Acvr1b","Atf2","Cxcl2","Flna","Il12b","Il3","Kpna4","Lcn2","Lemd3","Med12","Nap1l1","Ncor2","Plau","Polr2c","Psmc6","Rpa2","Smad1","Smarca5","Smarcc1","Sub1","Upf1","Vrk1"]
GO:0051128	4	regulation of cellular component organization	9	2307	2.77481	0.00105424	0.00564509	["Acvr1b","Flna","Il3","Lcn2","Lemd3","Psmc6","Smad1","Upf1","Vrk1"]
GO:2000243	5	positive regulation of reproductive process	2	40	0.0481112	0.00105645	0.00564509	["Acvr1b","Plau"]
GO:0019221	7	cytokine-mediated signaling pathway	4	386	0.464273	0.00110447	0.00584264	["Cxcl2","Il12b","Il3","Kpna4"]
GO:1903708	6	positive regulation of hemopoiesis	3	175	0.210486	0.001187	0.00621707	["Acvr1b","Il12b","Il3"]
GO:0006461	6	protein complex assembly	6	1041	1.25209	0.00125417	0.00650449	["Flna","Lcn2","Nap1l1","Nap1l4","Smad1","Smarca5"]
GO:0032496	5	response to lipopolysaccharide	4	405	0.487126	0.00131878	0.00677316	["Cxcl2","Il12b","Lcn2","Plau"]
GO:0044774	7	mitotic DNA integrity checkpoint	2	45	0.0541251	0.00133593	0.00679524	["Atf2","Rpa2"]
GO:0006259	5	DNA metabolic process	5	708	0.851568	0.00139533	0.00696491	["Nap1l1","Polr2c","Rpa2","Smarca5","Upf1"]
GO:0018107	8	peptidyl-threonine phosphorylation	2	46	0.0553279	0.00139562	0.00696491	["Acvr1b","Vrk1"]
GO:0006260	6	DNA replication	3	187	0.22492	0.00143608	0.00700321	["Nap1l1","Rpa2","Upf1"]
GO:0038034	6	signal transduction in absence of ligand	2	47	0.0565306	0.00145656	0.00700321	["Il3","Lcn2"]
GO:0042993	8	positive regulation of transcription factor import into nucleus	2	47	0.0565306	0.00145656	0.00700321	["Flna","Il12b"]
GO:0097192	7	extrinsic apoptotic signaling pathway in absence of ligand	2	47	0.0565306	0.00145656	0.00700321	["Il3","Lcn2"]
GO:0048583	4	regulation of response to stimulus	11	3494	4.20251	0.00146948	0.00700321	["Acvr1b","Atf2","Cxcl2","Flna","Il12b","Il3","Lemd3","Med12","Plau","Psmc6","Rpa2"]
GO:0006283	6	transcription-coupled nucleotide-excision repair	2	48	0.0577334	0.00151877	0.00711874	["Polr2c","Rpa2"]
GO:0002237	5	response to molecule of bacterial origin	4	421	0.50637	0.00152064	0.00711874	["Cxcl2","Il12b","Lcn2","Plau"]
GO:0006281	4	DNA repair	4	423	0.508776	0.0015473	0.00718004	["Polr2c","Rpa2","Smarca5","Upf1"]
GO:0009895	6	negative regulation of catabolic process	3	195	0.234542	0.00161908	0.00738326	["Flna","Il3","Smarcc1"]
GO:0045637	6	regulation of myeloid cell differentiation	3	196	0.235745	0.00164293	0.00738326	["Acvr1b","Il12b","Il3"]
GO:0018210	8	peptidyl-threonine modification	2	50	0.060139	0.00164693	0.00738326	["Acvr1b","Vrk1"]
GO:0061077	7	chaperone-mediated protein folding	2	50	0.060139	0.00164693	0.00738326	["Cct4","Fkbp3"]
GO:0071822	5	protein complex subunit organization	7	1515	1.82221	0.00168405	0.00748625	["Flna","Lcn2","Nap1l1","Nap1l4","Smad1","Smarca5","Smarcc1"]
GO:0010660	8	regulation of muscle cell apoptotic process	2	52	0.0625445	0.00178008	0.00778232	["Il12b","Smad1"]
GO:0042531	9	positive regulation of tyrosine phosphorylation of STAT protein	2	52	0.0625445	0.00178008	0.00778232	["Il12b","Il3"]
GO:0006955	3	immune response	6	1136	1.36636	0.00196162	0.00850569	["Atf2","Cxcl2","Il12b","Il3","Lcn2","Psmc6"]
GO:0065007	2	biological regulation	22	11898	14.3107	0.00205581	0.00884167	["Acvr1b","Atf2","Cxcl2","Flna","Il12b","Il3","Kpna4","Lcn2","Lemd3","Med12","Nap1l1","Ncor2","Plau","Polr2c","Psmc6","Rpa2","Smad1","Smarca5","Smarcc1","Sub1","Upf1","Vrk1"]
GO:0002763	8	positive regulation of myeloid leukocyte differentiation	2	57	0.0685584	0.00213462	0.00910656	["Il12b","Il3"]
GO:0045786	6	negative regulation of cell cycle	4	467	0.561698	0.00222018	0.00939581	["Atf2","Il12b","Psmc6","Rpa2"]
GO:0070997	5	neuron death	2	59	0.070964	0.00228504	0.00959355	["Cxcl2","Plau"]
GO:0043900	4	regulation of multi-organism process	4	472	0.567712	0.00230763	0.00961211	["Acvr1b","Il12b","Plau","Polr2c"]
GO:0044710	3	single-organism metabolic process	12	4295	5.16594	0.00232766	0.00961978	["Acot7","Acvr1b","Atf2","Ncor2","Polr2c","Psmc6","Rars","Rpa2","Smad1","Smarca5","Upf1","Vrk1"]
GO:0043044	7	ATP-dependent chromatin remodeling	2	60	0.0721668	0.00236209	0.00968639	["Smarca5","Smarcc1"]
GO:0044767	3	single-organism developmental process	13	4956	5.96098	0.00246237	0.01002	["Acvr1b","Atf2","Flna","Il12b","Il3","Lemd3","Med12","Ncor2","Plau","Polr2c","Smad1","Smarca5","Smarcc1"]
GO:0006351	6	transcription, DNA-templated	8	2110	2.53787	0.00261019	0.0104271	["Atf2","Flna","Med12","Ncor2","Polr2c","Smad1","Smarcc1","Sub1"]
GO:0097659	7	nucleic acid-templated transcription	8	2111	2.53907	0.00261803	0.0104271	["Atf2","Flna","Med12","Ncor2","Polr2c","Smad1","Smarcc1","Sub1"]
GO:0007178	8	transmembrane receptor protein serine/threonine kinase signaling pathway	3	231	0.277842	0.00262155	0.0104271	["Acvr1b","Ncor2","Smad1"]
GO:0006355	7	regulation of transcription, DNA-templated	10	3173	3.81642	0.00264681	0.010449	["Acvr1b","Atf2","Flna","Med12","Ncor2","Psmc6","Smad1","Smarca5","Smarcc1","Sub1"]
GO:0042509	8	regulation of tyrosine phosphorylation of STAT protein	2	65	0.0781807	0.00276553	0.010692	["Il12b","Il3"]
GO:0071347	7	cellular response to interleukin-1	2	65	0.0781807	0.00276553	0.010692	["Cxcl2","Lcn2"]
GO:1903506	8	regulation of nucleic acid-templated transcription	10	3195	3.84288	0.0027888	0.010692	["Acvr1b","Atf2","Flna","Med12","Ncor2","Psmc6","Smad1","Smarca5","Smarcc1","Sub1"]
GO:0006367	8	transcription initiation from RNA polymerase II promoter	3	237	0.285059	0.00281857	0.010692	["Med12","Ncor2","Polr2c"]
GO:0045930	7	negative regulation of mitotic cell cycle	3	237	0.285059	0.00281857	0.010692	["Atf2","Psmc6","Rpa2"]
GO:0050896	2	response to stimulus	15	6393	7.68937	0.00284347	0.010692	["Atf2","Cxcl2","Il12b","Il3","Kpna4","Lcn2","Nap1l1","Ncor2","Plau","Polr2c","Psmc6","Rpa2","Smad1","Smarca5","Upf1"]
GO:0046427	8	positive regulation of JAK-STAT cascade	2	66	0.0793835	0.00284985	0.010692	["Il12b","Il3"]
GO:0071396	6	cellular response to lipid	4	503	0.604998	0.00290381	0.0108177	["Cxcl2","Il12b","Lcn2","Plau"]
GO:1901700	4	response to oxygen-containing compound	7	1676	2.01586	0.00300042	0.0110995	["Cxcl2","Il12b","Kpna4","Lcn2","Nap1l1","Ncor2","Plau"]
GO:0016568	5	chromatin modification	4	514	0.618229	0.00313864	0.0115301	["Atf2","Smarca5","Smarcc1","Vrk1"]
GO:0000075	5	cell cycle checkpoint	3	247	0.297087	0.00316688	0.0115537	["Atf2","Psmc6","Rpa2"]
GO:0071345	6	cellular response to cytokine stimulus	3	253	0.304303	0.00338804	0.0122758	["Cxcl2","Il12b","Lcn2"]
GO:0023014	4	signal transduction by protein phosphorylation	3	255	0.306709	0.00346381	0.012465	["Acvr1b","Atf2","Smad1"]
GO:0009611	4	response to wounding	3	262	0.315128	0.00373722	0.0133443	["Cxcl2","Plau","Smad1"]
GO:0006289	5	nucleotide-excision repair	2	76	0.0914113	0.0037586	0.0133443	["Polr2c","Rpa2"]
GO:0042592	4	homeostatic process	6	1307	1.57203	0.00396012	0.013966	["Cxcl2","Lcn2","Ncor2","Plau","Rpa2","Smad1"]
GO:0008219	4	cell death	5	906	1.08972	0.00407879	0.0142893	["Cxcl2","Il3","Lcn2","Plau","Psmc6"]
GO:0045597	6	positive regulation of cell differentiation	5	909	1.09333	0.00413666	0.0143664	["Acvr1b","Flna","Il12b","Il3","Smad1"]
GO:0000077	6	DNA damage checkpoint	2	80	0.0962224	0.00415513	0.0143664	["Atf2","Rpa2"]
GO:0016265	3	death	5	914	1.09934	0.00423442	0.0145455	["Cxcl2","Il3","Lcn2","Plau","Psmc6"]
GO:0006952	4	defense response	6	1336	1.60691	0.00441197	0.0150576	["Atf2","Cxcl2","Il12b","Lcn2","Psmc6","Smad1"]
GO:0071310	5	cellular response to organic substance	6	1344	1.61654	0.00454315	0.0153781	["Cxcl2","Il12b","Lcn2","Nap1l1","Plau","Smad1"]
GO:1901701	5	cellular response to oxygen-containing compound	5	931	1.11979	0.00457929	0.0153781	["Cxcl2","Il12b","Lcn2","Nap1l1","Plau"]
GO:0080134	5	regulation of response to stress	6	1347	1.62014	0.00459308	0.0153781	["Atf2","Il12b","Il3","Plau","Psmc6","Rpa2"]
GO:0019538	4	protein metabolic process	11	4028	4.8448	0.00471134	0.0156328	["Acvr1b","Atf2","Cct4","Fkbp3","Il12b","Med12","Plau","Psmc6","Rars","Smad1","Vrk1"]
GO:0022414	2	reproductive process	6	1355	1.62977	0.00472826	0.0156328	["Acvr1b","Il12b","Ncor2","Plau","Smad1","Smarcc1"]
GO:0045089	7	positive regulation of innate immune response	3	289	0.347603	0.00491416	0.0161465	["Atf2","Il12b","Psmc6"]
GO:0009628	3	response to abiotic stimulus	6	1368	1.6454	0.00495423	0.0161777	["Atf2","Cxcl2","Il12b","Il3","Plau","Rpa2"]
GO:0032502	2	developmental process	13	5346	6.43006	0.00499184	0.0162005	["Acvr1b","Atf2","Flna","Il12b","Il3","Lemd3","Med12","Ncor2","Plau","Polr2c","Smad1","Smarca5","Smarcc1"]
GO:0022603	5	regulation of anatomical structure morphogenesis	5	953	1.14625	0.00505508	0.0163057	["Flna","Med12","Plau","Smad1","Vrk1"]
GO:0098763	4	mitotic cell cycle phase	3	293	0.352414	0.00510546	0.0163244	["Psmc6","Rpa2","Vrk1"]
GO:0010243	4	response to organonitrogen compound	5	956	1.14986	0.0051226	0.0163244	["Cxcl2","Nap1l1","Ncor2","Plau","Smad1"]
GO:0044772	6	mitotic cell cycle phase transition	3	294	0.353617	0.00515399	0.0163261	["Acvr1b","Psmc6","Rpa2"]
GO:0031570	6	DNA integrity checkpoint	2	90	0.10825	0.00522745	0.0164602	["Atf2","Rpa2"]
GO:0051726	5	regulation of cell cycle	5	965	1.16068	0.00532905	0.0165847	["Atf2","Il12b","Lemd3","Psmc6","Rpa2"]
GO:0044770	5	cell cycle phase transition	3	298	0.358428	0.00535087	0.0165847	["Acvr1b","Psmc6","Rpa2"]
GO:0048584	5	positive regulation of response to stimulus	7	1860	2.23717	0.00536102	0.0165847	["Acvr1b","Atf2","Cxcl2","Flna","Il12b","Il3","Psmc6"]
GO:0022403	3	cell cycle phase	3	301	0.362037	0.00550148	0.0168825	["Psmc6","Rpa2","Vrk1"]
GO:0022607	4	cellular component assembly	7	1870	2.2492	0.00552111	0.0168825	["Flna","Lcn2","Nap1l1","Nap1l4","Rpa2","Smad1","Smarca5"]
GO:0042990	9	regulation of transcription factor import into nucleus	2	94	0.113061	0.00568833	0.0172938	["Flna","Il12b"]
GO:0042221	3	response to chemical	9	2949	3.547	0.00581946	0.0175914	["Cxcl2","Il12b","Il3","Kpna4","Lcn2","Nap1l1","Ncor2","Plau","Smad1"]
GO:0016043	3	cellular component organization	12	4778	5.74688	0.00586592	0.0176311	["Atf2","Flna","Lcn2","Lemd3","Nap1l1","Nap1l4","Ncor2","Rpa2","Smad1","Smarca5","Smarcc1","Vrk1"]
GO:0042307	7	positive regulation of protein import into nucleus	2	96	0.115467	0.00592553	0.0177096	["Flna","Il12b"]
GO:0002682	4	regulation of immune system process	6	1428	1.71757	0.00610308	0.0181378	["Acvr1b","Atf2","Cxcl2","Il12b","Il3","Psmc6"]
GO:0046425	7	regulation of JAK-STAT cascade	2	99	0.119075	0.00628972	0.0185881	["Il12b","Il3"]
GO:0071840	2	cellular component organization or biogenesis	12	4836	5.81664	0.00649407	0.0190854	["Atf2","Flna","Lcn2","Lemd3","Nap1l1","Nap1l4","Ncor2","Rpa2","Smad1","Smarca5","Smarcc1","Vrk1"]
GO:0070555	6	response to interleukin-1	2	101	0.121481	0.00653808	0.0191085	["Cxcl2","Lcn2"]
GO:0044848	2	biological phase	3	322	0.387295	0.00662767	0.0192367	["Psmc6","Rpa2","Vrk1"]
GO:0010033	4	response to organic substance	8	2455	2.95282	0.00665466	0.0192367	["Cxcl2","Il12b","Il3","Lcn2","Nap1l1","Ncor2","Plau","Smad1"]
GO:0065008	3	regulation of biological quality	9	3015	3.62638	0.00674116	0.0193808	["Atf2","Cxcl2","Flna","Lcn2","Ncor2","Plau","Rpa2","Smad1","Vrk1"]
GO:1901698	4	response to nitrogen compound	5	1035	1.24488	0.00714313	0.0204255	["Cxcl2","Nap1l1","Ncor2","Plau","Smad1"]
GO:0051246	6	regulation of protein metabolic process	8	2488	2.99252	0.00721104	0.0205088	["Acvr1b","Flna","Il12b","Il3","Ncor2","Psmc6","Smarcc1","Upf1"]
GO:2000241	4	regulation of reproductive process	2	108	0.1299	0.00744204	0.0210526	["Acvr1b","Plau"]
GO:0009719	3	response to endogenous stimulus	6	1492	1.79455	0.00753449	0.0210919	["Cxcl2","Il3","Nap1l1","Ncor2","Plau","Smad1"]
GO:0007093	6	mitotic cell cycle checkpoint	2	109	0.131103	0.00757556	0.0210919	["Atf2","Rpa2"]
GO:1900182	6	positive regulation of protein localization to nucleus	2	109	0.131103	0.00757556	0.0210919	["Flna","Il12b"]
GO:2000134	9	negative regulation of G1/S transition of mitotic cell cycle	2	110	0.132306	0.00771015	0.0213543	["Psmc6","Rpa2"]
GO:0051240	5	positive regulation of multicellular organismal process	6	1505	1.81018	0.00785301	0.0216367	["Acvr1b","Atf2","Il12b","Il3","Plau","Smad1"]
GO:1902807	8	negative regulation of cell cycle G1/S phase transition	2	112	0.134711	0.00798259	0.0218797	["Psmc6","Rpa2"]
GO:0046824	8	positive regulation of nucleocytoplasmic transport	2	114	0.137117	0.00825934	0.0224214	["Flna","Il12b"]
GO:1903706	5	regulation of hemopoiesis	3	349	0.41977	0.00826497	0.0224214	["Acvr1b","Il12b","Il3"]
GO:0009966	5	regulation of signal transduction	8	2551	3.06829	0.00837251	0.0224406	["Acvr1b","Flna","Il12b","Il3","Lemd3","Med12","Plau","Psmc6"]
GO:0000084	5	mitotic S phase	2	115	0.13832	0.00839932	0.0224406	["Psmc6","Rpa2"]
GO:0051320	4	S phase	2	115	0.13832	0.00839932	0.0224406	["Psmc6","Rpa2"]
GO:0016310	6	phosphorylation	5	1079	1.2978	0.00848519	0.0225561	["Acvr1b","Atf2","Plau","Smad1","Vrk1"]
GO:0045444	6	fat cell differentiation	2	117	0.140725	0.0086825	0.0229652	["Atf2","Ncor2"]
GO:0031401	8	positive regulation of protein modification process	5	1088	1.30862	0.00878009	0.0231078	["Acvr1b","Il12b","Il3","Ncor2","Psmc6"]
GO:0002761	7	regulation of myeloid leukocyte differentiation	2	118	0.141928	0.00882568	0.0231128	["Il12b","Il3"]
GO:0033993	5	response to lipid	5	1094	1.31584	0.00898064	0.0233243	["Cxcl2","Il12b","Lcn2","Ncor2","Plau"]
GO:0045088	6	regulation of innate immune response	3	360	0.433001	0.00899461	0.0233243	["Atf2","Il12b","Psmc6"]
GO:0097190	6	apoptotic signaling pathway	3	361	0.434203	0.00906277	0.0233864	["Acvr1b","Il3","Lcn2"]
GO:0042177	7	negative regulation of protein catabolic process	2	120	0.144334	0.00911524	0.0234076	["Flna","Smarcc1"]
GO:0070665	7	positive regulation of leukocyte proliferation	2	124	0.149145	0.00970702	0.0248068	["Il12b","Il3"]
GO:0019725	4	cellular homeostasis	4	715	0.859988	0.00999913	0.0254305	["Cxcl2","Lcn2","Plau","Rpa2"]
GO:0042542	5	response to hydrogen peroxide	2	127	0.152753	0.0101618	0.0257207	["Kpna4","Lcn2"]
GO:0042127	5	regulation of cell proliferation	6	1591	1.91362	0.0102144	0.0257305	["Cxcl2","Il12b","Il3","Nap1l1","Plau","Smad1"]
GO:0030335	7	positive regulation of cell migration	3	379	0.455854	0.010342	0.0259286	["Acvr1b","Cxcl2","Plau"]
GO:0044267	5	cellular protein metabolic process	9	3240	3.89701	0.0107753	0.0268874	["Acvr1b","Atf2","Cct4","Fkbp3","Med12","Psmc6","Rars","Smad1","Vrk1"]
GO:0006302	5	double-strand break repair	2	132	0.158767	0.0109407	0.0271719	["Rpa2","Smarca5"]
GO:0031349	6	positive regulation of defense response	3	388	0.466679	0.0110193	0.0272392	["Atf2","Il12b","Psmc6"]
GO:2000147	6	positive regulation of cell motility	3	389	0.467881	0.0110961	0.0273015	["Acvr1b","Cxcl2","Plau"]
GO:0009790	4	embryo development	3	390	0.469084	0.0111732	0.027364	["Acvr1b","Ncor2","Smarca5"]
GO:0070887	4	cellular response to chemical stimulus	6	1633	1.96414	0.0115379	0.028127	["Cxcl2","Il12b","Lcn2","Nap1l1","Plau","Smad1"]
GO:0051272	6	positive regulation of cellular component movement	3	398	0.478706	0.0118015	0.0286375	["Acvr1b","Cxcl2","Plau"]
GO:0016477	4	cell migration	4	754	0.906896	0.011982	0.0289429	["Cxcl2","Il12b","Lemd3","Plau"]
GO:0034660	6	ncRNA metabolic process	3	402	0.483517	0.0121232	0.0291507	["Polr2c","Rars","Smad1"]
GO:0040017	5	positive regulation of locomotion	3	406	0.488329	0.0124499	0.0298009	["Acvr1b","Cxcl2","Plau"]
GO:1902107	7	positive regulation of leukocyte differentiation	2	142	0.170795	0.0125749	0.0299646	["Il12b","Il3"]
GO:0000278	5	mitotic cell cycle	3	409	0.491937	0.0126983	0.0301228	["Psmc6","Rpa2","Vrk1"]
GO:0007179	9	transforming growth factor beta receptor signaling pathway	2	144	0.1732	0.0129139	0.0304976	["Ncor2","Smad1"]
GO:0042176	6	regulation of protein catabolic process	3	414	0.497951	0.0131186	0.0308433	["Flna","Psmc6","Smarcc1"]
GO:0009888	4	tissue development	4	781	0.939371	0.0134946	0.0315869	["Acvr1b","Atf2","Plau","Smad1"]
GO:2000045	8	regulation of G1/S transition of mitotic cell cycle	2	149	0.179214	0.0137787	0.0321098	["Psmc6","Rpa2"]
GO:0009894	5	regulation of catabolic process	4	788	0.94779	0.0139059	0.0322642	["Flna","Il3","Psmc6","Smarcc1"]
GO:0006338	6	chromatin remodeling	2	153	0.184025	0.0144883	0.0334686	["Smarca5","Smarcc1"]
GO:0034097	5	response to cytokine	3	431	0.518398	0.0146074	0.033597	["Cxcl2","Il12b","Lcn2"]
GO:0031330	7	negative regulation of cellular catabolic process	2	155	0.186431	0.0148489	0.0338581	["Il3","Smarcc1"]
GO:1902806	8	regulation of cell cycle G1/S phase transition	2	155	0.186431	0.0148489	0.0338581	["Psmc6","Rpa2"]
GO:0051094	5	positive regulation of developmental process	5	1241	1.49265	0.0149524	0.0338784	["Acvr1b","Flna","Il12b","Il3","Smad1"]
GO:0048856	3	anatomical structure development	9	3413	4.10509	0.0149859	0.0338784	["Acvr1b","Atf2","Il3","Med12","Ncor2","Plau","Smad1","Smarca5","Smarcc1"]
GO:0000090	5	mitotic anaphase	2	157	0.188836	0.0152135	0.0339574	["Psmc6","Vrk1"]
GO:0019827	4	stem cell maintenance	2	157	0.188836	0.0152135	0.0339574	["Med12","Polr2c"]
GO:0051322	4	anaphase	2	157	0.188836	0.0152135	0.0339574	["Psmc6","Vrk1"]
GO:2000026	5	regulation of multicellular organismal development	6	1742	2.09524	0.0155437	0.0344887	["Acvr1b","Il12b","Il3","Med12","Plau","Smad1"]
GO:0098727	3	maintenance of cell number	2	159	0.191242	0.0155818	0.0344887	["Med12","Polr2c"]
GO:1903035	6	negative regulation of response to wounding	2	164	0.197256	0.0165196	0.0364119	["Il12b","Plau"]
GO:0006468	7	protein phosphorylation	4	832	1.00071	0.0166766	0.0365272	["Acvr1b","Atf2","Smad1","Vrk1"]
GO:0050731	10	positive regulation of peptidyl-tyrosine phosphorylation	2	165	0.198459	0.01671	0.0365272	["Il12b","Il3"]
GO:0018193	7	peptidyl-amino acid modification	4	837	1.00673	0.0170121	0.0370244	["Acvr1b","Atf2","Fkbp3","Vrk1"]
GO:0002376	2	immune system process	6	1780	2.14095	0.017147	0.0370244	["Atf2","Cxcl2","Il12b","Il3","Lcn2","Psmc6"]
GO:0048870	3	cell motility	4	839	1.00913	0.0171474	0.0370244	["Cxcl2","Il12b","Lemd3","Plau"]
GO:0043207	4	response to external biotic stimulus	4	842	1.01274	0.0173518	0.0373133	["Cxcl2","Il12b","Lcn2","Plau"]
GO:0032268	6	regulation of cellular protein metabolic process	7	2327	2.79887	0.0175679	0.0376252	["Acvr1b","Il12b","Il3","Ncor2","Psmc6","Smarcc1","Upf1"]
GO:0010770	6	positive regulation of cell morphogenesis involved in differentiation	2	170	0.204473	0.0176761	0.0377043	["Flna","Smad1"]
GO:0043123	8	positive regulation of I-kappaB kinase/NF-kappaB signaling	2	171	0.205675	0.0178722	0.0378175	["Flna","Il12b"]
GO:2000027	6	regulation of organ morphogenesis	2	171	0.205675	0.0178722	0.0378175	["Med12","Plau"]
GO:0042306	8	regulation of protein import into nucleus	2	172	0.206878	0.0180691	0.038082	["Flna","Il12b"]
GO:0023051	4	regulation of signaling	8	2916	3.50731	0.0181584	0.0381182	["Acvr1b","Flna","Il12b","Il3","Lemd3","Med12","Plau","Psmc6"]
GO:1901991	8	negative regulation of mitotic cell cycle phase transition	2	173	0.208081	0.018267	0.0381947	["Psmc6","Rpa2"]
GO:0010646	5	regulation of cell communication	8	2933	3.52775	0.0187613	0.0390736	["Acvr1b","Flna","Il12b","Il3","Lemd3","Med12","Plau","Psmc6"]
GO:0010810	6	regulation of cell-substrate adhesion	2	179	0.215298	0.0194739	0.0402543	["Flna","Plau"]
GO:0009607	3	response to biotic stimulus	4	872	1.04882	0.0194804	0.0402543	["Cxcl2","Il12b","Lcn2","Plau"]
GO:0009408	4	response to heat	2	181	0.217703	0.0198835	0.0409274	["Cxcl2","Rpa2"]
GO:0048646	3	anatomical structure formation involved in morphogenesis	4	879	1.05724	0.0199996	0.0410015	["Flna","Lemd3","Med12","Plau"]
GO:0008284	6	positive regulation of cell proliferation	4	880	1.05845	0.0200745	0.0410015	["Il12b","Il3","Nap1l1","Plau"]
GO:0048585	5	negative regulation of response to stimulus	5	1339	1.61052	0.0201725	0.0410432	["Il12b","Lemd3","Med12","Plau","Psmc6"]
GO:1901988	7	negative regulation of cell cycle phase transition	2	183	0.220109	0.0202967	0.0411377	["Psmc6","Rpa2"]
GO:0007346	6	regulation of mitotic cell cycle	3	493	0.59297	0.0208294	0.0420563	["Atf2","Psmc6","Rpa2"]
GO:0009967	6	positive regulation of signal transduction	5	1353	1.62736	0.0210059	0.0422027	["Acvr1b","Flna","Il12b","Il3","Psmc6"]
GO:0032270	7	positive regulation of cellular protein metabolic process	5	1355	1.62977	0.0211268	0.0422027	["Acvr1b","Il12b","Il3","Ncor2","Psmc6"]
GO:0007167	7	enzyme linked receptor protein signaling pathway	4	894	1.07529	0.0211413	0.0422027	["Acvr1b","Ncor2","Smad1","Smarcc1"]
GO:0030178	7	negative regulation of Wnt signaling pathway	2	188	0.226123	0.0213456	0.0424504	["Med12","Psmc6"]
GO:0006796	5	phosphate-containing compound metabolic process	6	1876	2.25641	0.0217104	0.0430142	["Acot7","Acvr1b","Atf2","Plau","Smad1","Vrk1"]
GO:1900180	7	regulation of protein localization to nucleus	2	194	0.233339	0.0226336	0.0446761	["Flna","Il12b"]
GO:0048878	5	chemical homeostasis	4	925	1.11257	0.0236278	0.046324	["Cxcl2","Lcn2","Ncor2","Plau"]
GO:0043066	8	negative regulation of apoptotic process	4	926	1.11377	0.0237109	0.046324	["Flna","Il3","Psmc6","Smad1"]
GO:0070663	6	regulation of leukocyte proliferation	2	199	0.239353	0.0237312	0.046324	["Il12b","Il3"]
GO:0000165	5	MAPK cascade	2	202	0.242962	0.0244002	0.0474548	["Atf2","Smad1"]
GO:0022604	5	regulation of cell morphogenesis	3	526	0.632662	0.0246542	0.0477299	["Flna","Smad1","Vrk1"]
GO:0043069	7	negative regulation of programmed cell death	4	938	1.12821	0.0247221	0.0477299	["Flna","Il3","Psmc6","Smad1"]
GO:0046777	8	protein autophosphorylation	2	204	0.245367	0.0248505	0.0478033	["Acvr1b","Vrk1"]
GO:0006793	4	phosphorus metabolic process	6	1937	2.32978	0.0250126	0.0478906	["Acot7","Acvr1b","Atf2","Plau","Smad1","Vrk1"]
GO:0010565	6	regulation of cellular ketone metabolic process	2	205	0.24657	0.0250769	0.0478906	["Ncor2","Psmc6"]
GO:0033500	6	carbohydrate homeostasis	2	208	0.250178	0.0257613	0.0488449	["Ncor2","Plau"]
GO:0042593	7	glucose homeostasis	2	208	0.250178	0.0257613	0.0488449	["Ncor2","Plau"]
GO:0032355	6	response to estradiol	2	210	0.252584	0.0262218	0.0495405	["Cxcl2","Ncor2"]
GO:0051247	7	positive regulation of protein metabolic process	5	1448	1.74163	0.0272718	0.0513409	["Acvr1b","Il12b","Il3","Ncor2","Psmc6"]
GO:0000302	5	response to reactive oxygen species	2	216	0.2598	0.0276236	0.0514537	["Kpna4","Lcn2"]
GO:0043903	5	regulation of symbiosis, encompassing mutualism through parasitism	2	216	0.2598	0.0276236	0.0514537	["Il12b","Polr2c"]
GO:0046822	8	regulation of nucleocytoplasmic transport	2	216	0.2598	0.0276236	0.0514537	["Flna","Il12b"]
GO:0040011	2	locomotion	4	973	1.1703	0.0278218	0.0515314	["Cxcl2","Il12b","Lemd3","Plau"]
GO:0006457	6	protein folding	2	217	0.261003	0.0278601	0.0515314	["Cct4","Fkbp3"]
GO:0061136	9	regulation of proteasomal protein catabolic process	2	220	0.264612	0.0285747	0.052669	["Psmc6","Smarcc1"]
GO:0000087	5	mitotic M phase	2	221	0.265814	0.0288145	0.0527435	["Psmc6","Vrk1"]
GO:0000279	4	M phase	2	221	0.265814	0.0288145	0.0527435	["Psmc6","Vrk1"]
GO:0006464	6	cellular protein modification process	7	2578	3.10077	0.029267	0.0530751	["Acvr1b","Atf2","Fkbp3","Med12","Psmc6","Smad1","Vrk1"]
GO:0036211	5	protein modification process	7	2578	3.10077	0.029267	0.0530751	["Acvr1b","Atf2","Fkbp3","Med12","Psmc6","Smad1","Vrk1"]
GO:0090092	6	regulation of transmembrane receptor protein serine/threonine kinase signaling pathway	2	223	0.26822	0.0292966	0.0530751	["Acvr1b","Lemd3"]
GO:0043122	7	regulation of I-kappaB kinase/NF-kappaB signaling	2	224	0.269423	0.0295389	0.0533313	["Flna","Il12b"]
GO:0050778	6	positive regulation of immune response	3	568	0.683179	0.0300405	0.0540525	["Atf2","Il12b","Psmc6"]
GO:0050730	9	regulation of peptidyl-tyrosine phosphorylation	2	227	0.273031	0.0302706	0.0542819	["Il12b","Il3"]
GO:0009725	4	response to hormone	4	1009	1.2136	0.0312466	0.0554874	["Cxcl2","Il3","Nap1l1","Ncor2"]
GO:0006913	7	nucleocytoplasmic transport	2	231	0.277842	0.0312576	0.0554874	["Kpna4","Upf1"]
GO:0009615	4	response to virus	2	231	0.277842	0.0312576	0.0554874	["Il12b","Lcn2"]
GO:0060548	6	negative regulation of cell death	4	1017	1.22323	0.0320405	0.0566871	["Flna","Il3","Psmc6","Smad1"]
GO:0023056	5	positive regulation of signaling	5	1515	1.82221	0.0323553	0.0570532	["Acvr1b","Flna","Il12b","Il3","Psmc6"]
GO:0051169	6	nuclear transport	2	236	0.283856	0.0325091	0.057134	["Kpna4","Upf1"]
GO:0009892	5	negative regulation of metabolic process	7	2639	3.17414	0.0327784	0.0572473	["Acvr1b","Flna","Il3","Ncor2","Psmc6","Smarca5","Smarcc1"]
GO:0010647	6	positive regulation of cell communication	5	1521	1.82943	0.0328382	0.0572473	["Acvr1b","Flna","Il12b","Il3","Psmc6"]
GO:0051239	4	regulation of multicellular organismal process	7	2641	3.17654	0.0328983	0.0572473	["Acvr1b","Atf2","Il12b","Il3","Med12","Plau","Smad1"]
GO:0055082	5	cellular chemical homeostasis	3	591	0.710843	0.0332358	0.0576451	["Cxcl2","Lcn2","Plau"]
GO:0002758	5	innate immune response-activating signal transduction	2	240	0.288667	0.0335246	0.0579559	["Atf2","Psmc6"]
GO:0045926	5	negative regulation of growth	2	241	0.28987	0.0337804	0.0582079	["Acvr1b","Il12b"]
GO:0090316	6	positive regulation of intracellular protein transport	2	243	0.292275	0.0342943	0.0588882	["Flna","Il12b"]
GO:0042981	7	regulation of apoptotic process	5	1540	1.85228	0.0343978	0.0588882	["Flna","Il12b","Il3","Psmc6","Smad1"]
GO:0002218	4	activation of innate immune response	2	245	0.294681	0.0348114	0.059404	["Atf2","Psmc6"]
GO:0043067	6	regulation of programmed cell death	5	1556	1.87153	0.0357472	0.0607921	["Flna","Il12b","Il3","Psmc6","Smad1"]
GO:0040029	7	regulation of gene expression, epigenetic	2	249	0.299492	0.0358547	0.0607921	["Smarca5","Upf1"]
GO:0010948	6	negative regulation of cell cycle process	2	250	0.300695	0.0361174	0.0608475	["Psmc6","Rpa2"]
GO:0032103	6	positive regulation of response to external stimulus	2	250	0.300695	0.0361174	0.0608475	["Cxcl2","Il12b"]
GO:0009266	4	response to temperature stimulus	2	253	0.304303	0.0369101	0.0619856	["Cxcl2","Rpa2"]
GO:0050878	4	regulation of body fluid levels	3	620	0.745723	0.037511	0.0627953	["Flna","Ncor2","Plau"]
GO:0043412	5	macromolecule modification	7	2719	3.27036	0.0378123	0.0631	["Acvr1b","Atf2","Fkbp3","Med12","Psmc6","Smad1","Vrk1"]
GO:0014070	5	response to organic cyclic compound	4	1073	1.29058	0.0379367	0.0631086	["Cxcl2","Ncor2","Plau","Smad1"]
GO:0016055	7	Wnt signaling pathway	2	258	0.310317	0.0382464	0.063226	["Med12","Vrk1"]
GO:1902105	6	regulation of leukocyte differentiation	2	258	0.310317	0.0382464	0.063226	["Il12b","Il3"]
GO:0032102	6	negative regulation of response to external stimulus	2	260	0.312723	0.0387861	0.0639158	["Il12b","Plau"]
GO:0031399	7	regulation of protein modification process	5	1592	1.91483	0.0389053	0.0639158	["Acvr1b","Il12b","Il3","Ncor2","Psmc6"]
GO:1901990	7	regulation of mitotic cell cycle phase transition	2	262	0.315128	0.0393287	0.0642126	["Psmc6","Rpa2"]
GO:1903651	7	positive regulation of cytoplasmic transport	2	262	0.315128	0.0393287	0.0642126	["Flna","Il12b"]
GO:0071363	6	cellular response to growth factor stimulus	2	263	0.316331	0.0396011	0.0644585	["Plau","Smad1"]
GO:0030334	6	regulation of cell migration	3	638	0.767373	0.0403018	0.0653977	["Acvr1b","Cxcl2","Plau"]
GO:0009617	4	response to bacterium	2	268	0.322345	0.0409742	0.0662855	["Il12b","Lcn2"]
GO:0030155	5	regulation of cell adhesion	3	647	0.778199	0.0417364	0.0672211	["Flna","Il12b","Plau"]
GO:0006935	4	chemotaxis	2	271	0.325953	0.0418067	0.0672211	["Cxcl2","Plau"]
GO:0042330	3	taxis	2	272	0.327156	0.0420856	0.0674645	["Cxcl2","Plau"]
GO:0001525	4	angiogenesis	2	273	0.328359	0.0423653	0.0675309	["Lemd3","Plau"]
GO:0044802	3	single-organism membrane organization	3	651	0.78301	0.0423823	0.0675309	["Atf2","Flna","Vrk1"]
GO:0048609	3	multicellular organismal reproductive process	3	657	0.790226	0.0433608	0.0688824	["Ncor2","Plau","Smad1"]
GO:1901987	7	regulation of cell cycle phase transition	2	277	0.33317	0.043491	0.0688824	["Psmc6","Rpa2"]
GO:0010941	5	regulation of cell death	5	1662	1.99902	0.0455356	0.0719054	["Flna","Il12b","Il3","Psmc6","Smad1"]
GO:1903050	8	regulation of proteolysis involved in cellular protein catabolic process	2	285	0.342792	0.045776	0.07207	["Psmc6","Smarcc1"]
GO:2000145	5	regulation of cell motility	3	675	0.811876	0.0463652	0.072781	["Acvr1b","Cxcl2","Plau"]
GO:0040008	4	regulation of growth	3	680	0.81789	0.047218	0.0736958	["Acvr1b","Il12b","Il3"]
GO:0051276	4	chromosome organization	2	290	0.348806	0.0472266	0.0736958	["Rpa2","Smarcc1"]
GO:1903533	8	regulation of protein targeting	2	293	0.352414	0.0481051	0.0748459	["Flna","Il12b"]
GO:0031329	6	regulation of cellular catabolic process	3	688	0.827512	0.0485989	0.0753924	["Il3","Psmc6","Smarcc1"]
GO:0001701	7	in utero embryonic development	2	296	0.356023	0.0489897	0.0757765	["Acvr1b","Ncor2"]

## Sheet: MyD88 Privative
ID	Level	Title	Number of hits	Group size	Expected hits	P-value	Adjusted P-value	Hit names
GO:0032496	5	response to lipopolysaccharide	6	405	0.2165	2.80208e-08	8.67722e-06	["Cd40","Cxcl1","Cxcl2","Il12b","Plau","Vcam1"]
GO:0002237	5	response to molecule of bacterial origin	6	421	0.225053	3.52732e-08	8.67722e-06	["Cd40","Cxcl1","Cxcl2","Il12b","Plau","Vcam1"]
GO:0002684	5	positive regulation of immune system process	7	873	0.466679	8.77009e-08	1.4383e-05	["Cd40","Csf1","Cxcl1","Cxcl2","Dusp4","Il12b","Vcam1"]
GO:1901700	4	response to oxygen-containing compound	8	1676	0.895937	3.58147e-07	2.60899e-05	["Cd40","Cxcl1","Cxcl2","Dag1","Il12b","Ncor2","Plau","Vcam1"]
GO:0032946	8	positive regulation of mononuclear cell proliferation	4	120	0.0641483	3.71893e-07	2.60899e-05	["Cd40","Csf1","Il12b","Vcam1"]
GO:0048583	4	regulation of response to stimulus	10	3494	1.86778	4.01968e-07	2.60899e-05	["Cd40","Csf1","Cxcl1","Cxcl2","Dag1","Dusp4","Flna","Il12b","Plau","Vcam1"]
GO:0033993	5	response to lipid	7	1094	0.584818	4.09019e-07	2.60899e-05	["Cd40","Cxcl1","Cxcl2","Il12b","Ncor2","Plau","Vcam1"]
GO:0070665	7	positive regulation of leukocyte proliferation	4	124	0.0662865	4.24226e-07	2.60899e-05	["Cd40","Csf1","Il12b","Vcam1"]
GO:0019221	7	cytokine-mediated signaling pathway	5	386	0.206344	1.05052e-06	5.74287e-05	["Csf1","Cxcl1","Cxcl2","Il12b","Vcam1"]
GO:0042592	4	homeostatic process	7	1307	0.698681	1.36477e-06	6.71468e-05	["Cd40","Csf1","Cxcl1","Cxcl2","Ncor2","Plau","Vcam1"]
GO:0006952	4	defense response	7	1336	0.714184	1.58252e-06	6.902e-05	["Cd40","Csf1","Cxcl1","Cxcl2","Dusp4","Il12b","Vcam1"]
GO:0048518	4	positive regulation of biological process	11	5484	2.93158	1.71037e-06	6.902e-05	["Cd40","Csf1","Cxcl1","Cxcl2","Dag1","Dusp4","Flna","Il12b","Ncor2","Plau","Vcam1"]
GO:0006954	5	inflammatory response	5	443	0.236814	2.06743e-06	6.902e-05	["Cd40","Csf1","Cxcl1","Cxcl2","Vcam1"]
GO:0043207	4	response to external biotic stimulus	6	842	0.450107	2.08255e-06	6.902e-05	["Cd40","Cxcl1","Cxcl2","Il12b","Plau","Vcam1"]
GO:0065008	3	regulation of biological quality	9	3015	1.61172	2.10749e-06	6.902e-05	["Cd40","Csf1","Cxcl1","Cxcl2","Dag1","Flna","Ncor2","Plau","Vcam1"]
GO:0032944	7	regulation of mononuclear cell proliferation	4	192	0.102637	2.43344e-06	6.902e-05	["Cd40","Csf1","Il12b","Vcam1"]
GO:0002682	4	regulation of immune system process	7	1428	0.763364	2.47767e-06	6.902e-05	["Cd40","Csf1","Cxcl1","Cxcl2","Dusp4","Il12b","Vcam1"]
GO:0009607	3	response to biotic stimulus	6	872	0.466144	2.55279e-06	6.902e-05	["Cd40","Cxcl1","Cxcl2","Il12b","Plau","Vcam1"]
GO:0008284	6	positive regulation of cell proliferation	6	880	0.470421	2.69191e-06	6.902e-05	["Cd40","Csf1","Cxcl1","Il12b","Plau","Vcam1"]
GO:0070663	6	regulation of leukocyte proliferation	4	199	0.106379	2.80569e-06	6.902e-05	["Cd40","Csf1","Il12b","Vcam1"]
GO:0071222	6	cellular response to lipopolysaccharide	4	208	0.11119	3.34452e-06	7.83573e-05	["Cd40","Cxcl2","Il12b","Plau"]
GO:0048878	5	chemical homeostasis	6	925	0.494476	3.59547e-06	8.04078e-05	["Cd40","Cxcl1","Cxcl2","Ncor2","Plau","Vcam1"]
GO:0071219	5	cellular response to molecule of bacterial origin	4	217	0.116001	3.95662e-06	8.46372e-05	["Cd40","Cxcl2","Il12b","Plau"]
GO:0010243	4	response to organonitrogen compound	6	956	0.511048	4.35207e-06	8.92173e-05	["Cxcl1","Cxcl2","Dag1","Ncor2","Plau","Vcam1"]
GO:0040011	2	locomotion	6	973	0.520135	4.81943e-06	9.4283e-05	["Cxcl1","Cxcl2","Dag1","Il12b","Plau","Vcam1"]
GO:0042127	5	regulation of cell proliferation	7	1591	0.850499	5.11323e-06	9.4283e-05	["Cd40","Csf1","Cxcl1","Cxcl2","Il12b","Plau","Vcam1"]
GO:0050793	4	regulation of developmental process	8	2374	1.26907	5.17407e-06	9.4283e-05	["Cd40","Csf1","Cxcl1","Dag1","Flna","Il12b","Ncor2","Plau"]
GO:0071216	4	cellular response to biotic stimulus	4	237	0.126693	5.61062e-06	9.85867e-05	["Cd40","Cxcl2","Il12b","Plau"]
GO:0032879	4	regulation of localization	8	2436	1.30221	6.29277e-06	0.000106549	["Cd40","Csf1","Cxcl1","Cxcl2","Dag1","Flna","Il12b","Plau"]
GO:0010033	4	response to organic substance	8	2455	1.31237	6.67472e-06	0.000106549	["Cd40","Cxcl1","Cxcl2","Dag1","Il12b","Ncor2","Plau","Vcam1"]
GO:1901698	4	response to nitrogen compound	6	1035	0.553279	6.88613e-06	0.000106549	["Cxcl1","Cxcl2","Dag1","Ncor2","Plau","Vcam1"]
GO:0032103	6	positive regulation of response to external stimulus	4	250	0.133642	6.93003e-06	0.000106549	["Csf1","Cxcl1","Cxcl2","Il12b"]
GO:0002690	7	positive regulation of leukocyte chemotaxis	3	75	0.0400927	7.71176e-06	0.000114808	["Csf1","Cxcl1","Cxcl2"]
GO:0048522	5	positive regulation of cellular process	10	4765	2.54722	7.93389e-06	0.000114808	["Cd40","Csf1","Cxcl1","Cxcl2","Dag1","Flna","Il12b","Ncor2","Plau","Vcam1"]
GO:0055082	5	cellular chemical homeostasis	5	591	0.31593	8.44976e-06	0.000118779	["Cd40","Cxcl1","Cxcl2","Plau","Vcam1"]
GO:0006935	4	chemotaxis	4	271	0.144868	9.52905e-06	0.000128565	["Cxcl1","Cxcl2","Plau","Vcam1"]
GO:0042330	3	taxis	4	272	0.145403	9.6685e-06	0.000128565	["Cxcl1","Cxcl2","Plau","Vcam1"]
GO:0002376	2	immune system process	7	1780	0.951532	1.08022e-05	0.00013986	["Cd40","Csf1","Cxcl1","Cxcl2","Dusp4","Il12b","Vcam1"]
GO:0030334	6	regulation of cell migration	5	638	0.341055	1.22503e-05	0.000154543	["Csf1","Cxcl1","Cxcl2","Dag1","Plau"]
GO:0030155	5	regulation of cell adhesion	5	647	0.345866	1.31107e-05	0.000160277	["Csf1","Flna","Il12b","Plau","Vcam1"]
GO:0002688	6	regulation of leukocyte chemotaxis	3	90	0.0481112	1.33564e-05	0.000160277	["Csf1","Cxcl1","Cxcl2"]
GO:0048584	5	positive regulation of response to stimulus	7	1860	0.994298	1.44588e-05	0.000168845	["Cd40","Csf1","Cxcl1","Cxcl2","Dusp4","Flna","Il12b"]
GO:0001775	4	cell activation	5	663	0.354419	1.47568e-05	0.000168845	["Cd40","Csf1","Flna","Il12b","Vcam1"]
GO:2000145	5	regulation of cell motility	5	675	0.360834	1.60945e-05	0.000179965	["Csf1","Cxcl1","Cxcl2","Dag1","Plau"]
GO:0002705	7	positive regulation of leukocyte mediated immunity	3	100	0.0534569	1.83286e-05	0.00019956	["Cd40","Cxcl1","Il12b"]
GO:0007166	6	cell surface receptor signaling pathway	9	3893	2.08108	1.86581e-05	0.00019956	["Cd40","Csf1","Cxcl1","Cxcl2","Dusp4","Flna","Il12b","Ncor2","Vcam1"]
GO:0051094	5	positive regulation of developmental process	6	1241	0.6634	1.95294e-05	0.000204435	["Cd40","Csf1","Cxcl1","Dag1","Flna","Il12b"]
GO:0019725	4	cellular homeostasis	5	715	0.382217	2.12538e-05	0.000217851	["Cd40","Cxcl1","Cxcl2","Plau","Vcam1"]
GO:0051270	5	regulation of cellular component movement	5	730	0.390235	2.34917e-05	0.000232785	["Csf1","Cxcl1","Cxcl2","Dag1","Plau"]
GO:0032502	2	developmental process	10	5346	2.8578	2.3657e-05	0.000232785	["Csf1","Cxcl1","Dag1","Dusp4","Flna","Il12b","Ncor2","Plau","Ubp1","Vcam1"]
GO:0040012	4	regulation of locomotion	5	746	0.398788	2.6078e-05	0.000250119	["Csf1","Cxcl1","Cxcl2","Dag1","Plau"]
GO:0042221	3	response to chemical	8	2949	1.57644	2.65697e-05	0.000250119	["Cd40","Cxcl1","Cxcl2","Dag1","Il12b","Ncor2","Plau","Vcam1"]
GO:0002687	6	positive regulation of leukocyte migration	3	114	0.0609408	2.71417e-05	0.000250119	["Csf1","Cxcl1","Cxcl2"]
GO:0016477	4	cell migration	5	754	0.403065	2.74521e-05	0.000250119	["Cxcl1","Cxcl2","Il12b","Plau","Vcam1"]
GO:0050671	8	positive regulation of lymphocyte proliferation	3	118	0.0630791	3.00911e-05	0.000264372	["Cd40","Il12b","Vcam1"]
GO:0050921	6	positive regulation of chemotaxis	3	118	0.0630791	3.00911e-05	0.000264372	["Csf1","Cxcl1","Cxcl2"]
GO:0045785	6	positive regulation of cell adhesion	4	370	0.19779	3.23751e-05	0.000279449	["Csf1","Flna","Il12b","Vcam1"]
GO:0009628	3	response to abiotic stimulus	6	1368	0.73129	3.40283e-05	0.000288654	["Cd40","Cxcl1","Cxcl2","Il12b","Plau","Vcam1"]
GO:0042510	9	regulation of tyrosine phosphorylation of Stat1 protein	2	17	0.00908767	3.54684e-05	0.000289572	["Cd40","Il12b"]
GO:0030335	7	positive regulation of cell migration	4	379	0.202602	3.55635e-05	0.000289572	["Csf1","Cxcl1","Cxcl2","Plau"]
GO:0031323	5	regulation of cellular metabolic process	10	5591	2.98877	3.61151e-05	0.000289572	["Cd40","Csf1","Cxcl1","Dag1","Dusp4","Flna","Il12b","Ncor2","Plau","Ubp1"]
GO:0032101	5	regulation of response to external stimulus	5	800	0.427655	3.64908e-05	0.000289572	["Csf1","Cxcl1","Cxcl2","Il12b","Plau"]
GO:0006928	4	movement of cell or subcellular component	6	1390	0.743051	3.72556e-05	0.000290949	["Cxcl1","Cxcl2","Dag1","Il12b","Plau","Vcam1"]
GO:0007165	5	signal transduction	10	5637	3.01336	3.90135e-05	0.000298006	["Cd40","Csf1","Cxcl1","Cxcl2","Dusp4","Flna","Il12b","Ncor2","Plau","Vcam1"]
GO:2000147	6	positive regulation of cell motility	4	389	0.207947	3.93708e-05	0.000298006	["Csf1","Cxcl1","Cxcl2","Plau"]
GO:0051272	6	positive regulation of cellular component movement	4	398	0.212758	4.30462e-05	0.000318396	["Csf1","Cxcl1","Cxcl2","Plau"]
GO:0006950	3	response to stress	8	3149	1.68336	4.33588e-05	0.000318396	["Cd40","Csf1","Cxcl1","Cxcl2","Dusp4","Il12b","Plau","Vcam1"]
GO:0048870	3	cell motility	5	839	0.448503	4.58439e-05	0.000331694	["Cxcl1","Cxcl2","Il12b","Plau","Vcam1"]
GO:0040017	5	positive regulation of locomotion	4	406	0.217035	4.65195e-05	0.000331704	["Csf1","Cxcl1","Cxcl2","Plau"]
GO:0009719	3	response to endogenous stimulus	6	1492	0.797577	5.56373e-05	0.000385613	["Cxcl1","Cxcl2","Dag1","Ncor2","Plau","Vcam1"]
GO:0048520	6	positive regulation of behavior	3	145	0.0775125	5.56474e-05	0.000385613	["Csf1","Cxcl1","Cxcl2"]
GO:1902531	6	regulation of intracellular signal transduction	6	1500	0.801853	5.73437e-05	0.000391848	["Cd40","Csf1","Dag1","Dusp4","Flna","Il12b"]
GO:0051240	5	positive regulation of multicellular organismal process	6	1505	0.804526	5.84315e-05	0.000393234	["Cd40","Csf1","Cxcl1","Dag1","Il12b","Plau"]
GO:0002685	5	regulation of leukocyte migration	3	148	0.0791162	5.91449e-05	0.000393234	["Csf1","Cxcl1","Cxcl2"]
GO:0045321	3	leukocyte activation	4	449	0.240021	6.88259e-05	0.000451498	["Cd40","Csf1","Il12b","Vcam1"]
GO:0010212	5	response to ionizing radiation	3	160	0.085531	7.45742e-05	0.000473113	["Cxcl1","Cxcl2","Vcam1"]
GO:1901701	5	cellular response to oxygen-containing compound	5	931	0.497684	7.53462e-05	0.000473113	["Cd40","Cxcl2","Il12b","Plau","Vcam1"]
GO:0050920	5	regulation of chemotaxis	3	161	0.0860656	7.59673e-05	0.000473113	["Csf1","Cxcl1","Cxcl2"]
GO:0060326	5	cell chemotaxis	3	161	0.0860656	7.59673e-05	0.000473113	["Cxcl1","Cxcl2","Vcam1"]
GO:0009605	3	response to external stimulus	6	1592	0.851033	8.02024e-05	0.000487155	["Cd40","Cxcl1","Cxcl2","Il12b","Plau","Vcam1"]
GO:0031399	7	regulation of protein modification process	6	1592	0.851033	8.02024e-05	0.000487155	["Cd40","Csf1","Dag1","Dusp4","Il12b","Ncor2"]
GO:0002703	6	regulation of leukocyte mediated immunity	3	167	0.089273	8.4685e-05	0.00050811	["Cd40","Cxcl1","Il12b"]
GO:0002699	6	positive regulation of immune effector process	3	168	0.0898076	8.61987e-05	0.000510961	["Cd40","Cxcl1","Il12b"]
GO:0043123	8	positive regulation of I-kappaB kinase/NF-kappaB signaling	3	171	0.0914113	9.0846e-05	0.000528282	["Cd40","Flna","Il12b"]
GO:0045672	9	positive regulation of osteoclast differentiation	2	27	0.0144334	9.12683e-05	0.000528282	["Csf1","Il12b"]
GO:0097305	5	response to alcohol	4	490	0.261939	9.65831e-05	0.000543959	["Cxcl1","Cxcl2","Ncor2","Vcam1"]
GO:0051246	6	regulation of protein metabolic process	7	2488	1.33001	9.72814e-05	0.000543959	["Cd40","Csf1","Dag1","Dusp4","Flna","Il12b","Ncor2"]
GO:1903708	6	positive regulation of hemopoiesis	3	175	0.0935495	9.72934e-05	0.000543959	["Csf1","Cxcl1","Il12b"]
GO:0010810	6	regulation of cell-substrate adhesion	3	179	0.0956878	0.000104033	0.000575106	["Csf1","Flna","Plau"]
GO:0071396	6	cellular response to lipid	4	503	0.268888	0.00010688	0.000584278	["Cd40","Cxcl2","Il12b","Plau"]
GO:0042832	5	defense response to protozoan	2	30	0.0160371	0.00011301	0.000610997	["Cd40","Il12b"]
GO:0009966	5	regulation of signal transduction	7	2551	1.36368	0.00011436	0.000611576	["Cd40","Csf1","Dag1","Dusp4","Flna","Il12b","Plau"]
GO:0032735	7	positive regulation of interleukin-12 production	2	31	0.0165716	0.000120767	0.000638899	["Cd40","Il12b"]
GO:0050670	7	regulation of lymphocyte proliferation	3	190	0.101568	0.000124125	0.000649675	["Cd40","Il12b","Vcam1"]
GO:0050896	2	response to stimulus	10	6393	3.4175	0.00012681	0.000656741	["Cd40","Csf1","Cxcl1","Cxcl2","Dag1","Dusp4","Il12b","Ncor2","Plau","Vcam1"]
GO:0002833	6	positive regulation of response to biotic stimulus	2	32	0.0171062	0.00012878	0.000659999	["Cxcl1","Il12b"]
GO:0009314	4	response to radiation	4	530	0.283321	0.000130799	0.000663437	["Cxcl1","Cxcl2","Il12b","Vcam1"]
GO:2000026	5	regulation of multicellular organismal development	6	1742	0.931219	0.000132847	0.000666947	["Cd40","Csf1","Cxcl1","Dag1","Il12b","Plau"]
GO:0044767	3	single-organism developmental process	9	4956	2.64932	0.000140667	0.000699073	["Csf1","Dag1","Dusp4","Flna","Il12b","Ncor2","Plau","Ubp1","Vcam1"]
GO:0019222	4	regulation of metabolic process	10	6481	3.46454	0.000144011	0.000708535	["Cd40","Csf1","Cxcl1","Dag1","Dusp4","Flna","Il12b","Ncor2","Plau","Ubp1"]
GO:0001562	4	response to protozoan	2	34	0.0181753	0.00014557	0.000709115	["Cd40","Il12b"]
GO:0014070	5	response to organic cyclic compound	5	1073	0.573592	0.000147707	0.000712467	["Cxcl1","Cxcl2","Ncor2","Plau","Vcam1"]
GO:0033500	6	carbohydrate homeostasis	3	208	0.11119	0.000162191	0.00076729	["Ncor2","Plau","Vcam1"]
GO:0042593	7	glucose homeostasis	3	208	0.11119	0.000162191	0.00076729	["Ncor2","Plau","Vcam1"]
GO:0032355	6	response to estradiol	3	210	0.112259	0.000166838	0.000781753	["Cxcl1","Cxcl2","Ncor2"]
GO:0050794	4	regulation of cellular process	12	10916	5.83535	0.000174293	0.000808984	["Cd40","Csf1","Cxcl1","Cxcl2","Dag1","Dusp4","Flna","Il12b","Ncor2","Plau","Ubp1","Vcam1"]
GO:0006955	3	immune response	5	1136	0.60727	0.000193268	0.000888673	["Csf1","Cxcl1","Cxcl2","Dusp4","Il12b"]
GO:0043122	7	regulation of I-kappaB kinase/NF-kappaB signaling	3	224	0.119743	0.000201807	0.000919343	["Cd40","Flna","Il12b"]
GO:0050795	5	regulation of behavior	3	235	0.125624	0.000232396	0.00104898	["Csf1","Cxcl1","Cxcl2"]
GO:0032655	6	regulation of interleukin-12 production	2	45	0.0240556	0.000256051	0.00114525	["Cd40","Il12b"]
GO:0051251	7	positive regulation of lymphocyte activation	3	244	0.130435	0.000259549	0.00115043	["Cd40","Il12b","Vcam1"]
GO:0001912	6	positive regulation of leukocyte mediated cytotoxicity	2	46	0.0245902	0.00026761	0.00116423	["Cxcl1","Il12b"]
GO:0001975	6	response to amphetamine	2	46	0.0245902	0.00026761	0.00116423	["Cxcl1","Cxcl2"]
GO:0023051	4	regulation of signaling	7	2916	1.5588	0.000269761	0.00116423	["Cd40","Csf1","Dag1","Dusp4","Flna","Il12b","Plau"]
GO:0042993	8	positive regulation of transcription factor import into nucleus	2	47	0.0251247	0.000279421	0.00117717	["Flna","Il12b"]
GO:0070098	8	chemokine-mediated signaling pathway	2	47	0.0251247	0.000279421	0.00117717	["Cxcl1","Cxcl2"]
GO:0010646	5	regulation of cell communication	7	2933	1.56789	0.000279937	0.00117717	["Cd40","Csf1","Dag1","Dusp4","Flna","Il12b","Plau"]
GO:0071345	6	cellular response to cytokine stimulus	3	253	0.135246	0.000288684	0.00120367	["Cxcl2","Il12b","Vcam1"]
GO:0050789	3	regulation of biological process	12	11418	6.10371	0.00029903	0.00123632	["Cd40","Csf1","Cxcl1","Cxcl2","Dag1","Dusp4","Flna","Il12b","Ncor2","Plau","Ubp1","Vcam1"]
GO:0030593	6	neutrophil chemotaxis	2	50	0.0267284	0.00031636	0.00129708	["Cxcl1","Cxcl2"]
GO:0001932	8	regulation of protein phosphorylation	5	1279	0.683713	0.000336742	0.00136896	["Cd40","Csf1","Dag1","Dusp4","Il12b"]
GO:0031343	5	positive regulation of cell killing	2	52	0.0277976	0.000342241	0.00136896	["Cxcl1","Il12b"]
GO:0042531	9	positive regulation of tyrosine phosphorylation of STAT protein	2	52	0.0277976	0.000342241	0.00136896	["Cd40","Il12b"]
GO:1990266	6	neutrophil migration	2	53	0.0283321	0.000355556	0.00140506	["Cxcl1","Cxcl2"]
GO:0002696	6	positive regulation of leukocyte activation	3	272	0.145403	0.000356976	0.00140506	["Cd40","Il12b","Vcam1"]
GO:0050867	6	positive regulation of cell activation	3	283	0.151283	0.0004009	0.00156542	["Cd40","Il12b","Vcam1"]
GO:0002763	8	positive regulation of myeloid leukocyte differentiation	2	57	0.0304704	0.000411316	0.00159345	["Csf1","Il12b"]
GO:0071310	5	cellular response to organic substance	5	1344	0.71846	0.000424097	0.00163012	["Cd40","Cxcl2","Il12b","Plau","Vcam1"]
GO:0022414	2	reproductive process	5	1355	0.724341	0.000440451	0.00164731	["Csf1","Il12b","Ncor2","Plau","Vcam1"]
GO:0070997	5	neuron death	2	59	0.0315396	0.000440692	0.00164731	["Cxcl2","Plau"]
GO:0071621	5	granulocyte chemotaxis	2	59	0.0315396	0.000440692	0.00164731	["Cxcl1","Cxcl2"]
GO:0042325	8	regulation of phosphorylation	5	1356	0.724875	0.000441961	0.00164731	["Cd40","Csf1","Dag1","Dusp4","Il12b"]
GO:0051704	2	multi-organism process	5	1364	0.729152	0.000454187	0.00167336	["Cd40","Dag1","Il12b","Ubp1","Vcam1"]
GO:0010332	6	response to gamma radiation	2	60	0.0320741	0.000455753	0.00167336	["Cxcl1","Cxcl2"]
GO:0008283	3	cell proliferation	4	738	0.394512	0.00046446	0.0016927	["Cd40","Csf1","Cxcl1","Ncor2"]
GO:0065007	2	biological regulation	12	11898	6.3603	0.000490256	0.00177357	["Cd40","Csf1","Cxcl1","Cxcl2","Dag1","Dusp4","Flna","Il12b","Ncor2","Plau","Ubp1","Vcam1"]
GO:0001910	5	regulation of leukocyte mediated cytotoxicity	2	63	0.0336778	0.000502425	0.00179126	["Cxcl1","Il12b"]
GO:0097530	5	granulocyte migration	2	63	0.0336778	0.000502425	0.00179126	["Cxcl1","Cxcl2"]
GO:0042509	8	regulation of tyrosine phosphorylation of STAT protein	2	65	0.034747	0.000534779	0.00189289	["Cd40","Il12b"]
GO:0002521	6	leukocyte differentiation	3	315	0.168389	0.000548125	0.00191023	["Csf1","Il12b","Vcam1"]
GO:0045670	8	regulation of osteoclast differentiation	2	66	0.0352815	0.000551328	0.00191023	["Csf1","Il12b"]
GO:0046427	8	positive regulation of JAK-STAT cascade	2	66	0.0352815	0.000551328	0.00191023	["Cd40","Il12b"]
GO:0006874	9	cellular calcium ion homeostasis	3	319	0.170527	0.000568652	0.00195648	["Cd40","Cxcl1","Cxcl2"]
GO:0014075	5	response to amine	2	68	0.0363507	0.000585165	0.00199931	["Cxcl1","Cxcl2"]
GO:0043627	6	response to estrogen	3	328	0.175339	0.000616634	0.0020923	["Cxcl1","Cxcl2","Ncor2"]
GO:0072503	8	cellular divalent inorganic cation homeostasis	3	332	0.177477	0.000638768	0.00215256	["Cd40","Cxcl1","Cxcl2"]
GO:0032268	6	regulation of cellular protein metabolic process	6	2327	1.24394	0.00065506	0.00217976	["Cd40","Csf1","Dag1","Dusp4","Il12b","Ncor2"]
GO:0055074	9	calcium ion homeostasis	3	335	0.179081	0.0006557	0.00217976	["Cd40","Cxcl1","Cxcl2"]
GO:0031341	4	regulation of cell killing	2	74	0.0395581	0.000692588	0.00228694	["Cxcl1","Il12b"]
GO:0050776	5	regulation of immune response	4	825	0.441019	0.000707825	0.00232167	["Cd40","Dusp4","Il12b","Vcam1"]
GO:0009653	3	anatomical structure morphogenesis	5	1514	0.809337	0.000735206	0.00239049	["Csf1","Dag1","Flna","Ncor2","Vcam1"]
GO:1903706	5	regulation of hemopoiesis	3	349	0.186565	0.000738525	0.00239049	["Csf1","Cxcl1","Il12b"]
GO:0072507	8	divalent inorganic cation homeostasis	3	358	0.191376	0.000795153	0.00255216	["Cd40","Cxcl1","Cxcl2"]
GO:0048519	4	negative regulation of biological process	8	4697	2.51087	0.000798847	0.00255216	["Cxcl1","Dag1","Dusp4","Flna","Il12b","Ncor2","Plau","Ubp1"]
GO:0044763	3	single-organism cellular process	11	9820	5.24947	0.000804811	0.00255463	["Cd40","Csf1","Cxcl1","Cxcl2","Dag1","Dusp4","Flna","Il12b","Ncor2","Plau","Vcam1"]
GO:1902533	7	positive regulation of intracellular signal transduction	4	857	0.458125	0.000816779	0.002576	["Cd40","Csf1","Flna","Il12b"]
GO:0002708	8	positive regulation of lymphocyte mediated immunity	2	81	0.0433001	0.000829073	0.00258167	["Cd40","Il12b"]
GO:0042102	9	positive regulation of T cell proliferation	2	81	0.0433001	0.000829073	0.00258167	["Il12b","Vcam1"]
GO:0046649	4	lymphocyte activation	3	366	0.195652	0.000847762	0.00261236	["Cd40","Il12b","Vcam1"]
GO:0071333	7	cellular response to glucose stimulus	2	82	0.0438346	0.000849548	0.00261236	["Plau","Vcam1"]
GO:0002824	8	positive regulation of adaptive immune response based on somatic recombination of immune receptors built from immunoglobulin superfamily domains	2	83	0.0443692	0.000870266	0.00265945	["Cd40","Il12b"]
GO:0002526	6	acute inflammatory response	2	84	0.0449038	0.000891227	0.00269008	["Cxcl1","Vcam1"]
GO:0071331	8	cellular response to hexose stimulus	2	84	0.0449038	0.000891227	0.00269008	["Plau","Vcam1"]
GO:0048646	3	anatomical structure formation involved in morphogenesis	4	879	0.469886	0.000898316	0.00269495	["Dusp4","Flna","Plau","Ubp1"]
GO:0045639	7	positive regulation of myeloid cell differentiation	2	86	0.0459729	0.000933879	0.0027632	["Csf1","Il12b"]
GO:0071326	7	cellular response to monosaccharide stimulus	2	86	0.0459729	0.000933879	0.0027632	["Plau","Vcam1"]
GO:0051249	6	regulation of lymphocyte activation	3	379	0.202602	0.000937915	0.0027632	["Cd40","Il12b","Vcam1"]
GO:0097529	4	myeloid leukocyte migration	2	87	0.0465075	0.000955568	0.00279845	["Cxcl1","Cxcl2"]
GO:0002821	7	positive regulation of adaptive immune response	2	89	0.0475766	0.000999675	0.00289133	["Cd40","Il12b"]
GO:0031349	6	positive regulation of defense response	3	388	0.207413	0.00100378	0.00289133	["Cxcl1","Dusp4","Il12b"]
GO:0044699	2	single-organism process	12	12631	6.75214	0.00100491	0.00289133	["Cd40","Csf1","Cxcl1","Cxcl2","Dag1","Dusp4","Flna","Il12b","Ncor2","Plau","Ubp1","Vcam1"]
GO:0019220	7	regulation of phosphate metabolic process	5	1626	0.869209	0.00101932	0.00291573	["Cd40","Csf1","Dag1","Dusp4","Il12b"]
GO:0070887	4	cellular response to chemical stimulus	5	1633	0.872951	0.00103949	0.00295624	["Cd40","Cxcl2","Il12b","Plau","Vcam1"]
GO:0051174	6	regulation of phosphorus metabolic process	5	1639	0.876158	0.00105702	0.0029888	["Cd40","Csf1","Dag1","Dusp4","Il12b"]
GO:0001952	7	regulation of cell-matrix adhesion	2	92	0.0491803	0.00106765	0.00300162	["Csf1","Plau"]
GO:2000379	7	positive regulation of reactive oxygen species metabolic process	2	93	0.0497149	0.00109079	0.00304925	["Cxcl1","Plau"]
GO:0042990	9	regulation of transcription factor import into nucleus	2	94	0.0502495	0.00111417	0.00309702	["Flna","Il12b"]
GO:0042307	7	positive regulation of protein import into nucleus	2	96	0.0513186	0.00116166	0.00321087	["Flna","Il12b"]
GO:0009987	2	cellular process	12	12806	6.84569	0.00118541	0.00324108	["Cd40","Csf1","Cxcl1","Cxcl2","Dag1","Dusp4","Flna","Il12b","Ncor2","Plau","Ubp1","Vcam1"]
GO:0071322	6	cellular response to carbohydrate stimulus	2	97	0.0518532	0.00118576	0.00324108	["Plau","Vcam1"]
GO:0022603	5	regulation of anatomical structure morphogenesis	4	953	0.509444	0.00121535	0.00329383	["Csf1","Dag1","Flna","Plau"]
GO:0045595	5	regulation of cell differentiation	5	1691	0.903956	0.00121845	0.00329383	["Csf1","Dag1","Flna","Il12b","Ncor2"]
GO:0007160	5	cell-matrix adhesion	2	99	0.0529223	0.00123469	0.00330145	["Dag1","Vcam1"]
GO:0046425	7	regulation of JAK-STAT cascade	2	99	0.0529223	0.00123469	0.00330145	["Cd40","Il12b"]
GO:0001678	6	cellular glucose homeostasis	2	101	0.0539914	0.00128458	0.00341628	["Plau","Vcam1"]
GO:0051239	4	regulation of multicellular organismal process	6	2641	1.4118	0.00129526	0.00342617	["Cd40","Csf1","Cxcl1","Dag1","Il12b","Plau"]
GO:0002697	5	regulation of immune effector process	3	429	0.22933	0.00134106	0.00352836	["Cd40","Cxcl1","Il12b"]
GO:0006875	8	cellular metal ion homeostasis	3	431	0.230399	0.00135913	0.00353805	["Cd40","Cxcl1","Cxcl2"]
GO:0034097	5	response to cytokine	3	431	0.230399	0.00135913	0.00353805	["Cxcl2","Il12b","Vcam1"]
GO:0002694	5	regulation of leukocyte activation	3	442	0.236279	0.00146125	0.00375844	["Cd40","Il12b","Vcam1"]
GO:0010811	7	positive regulation of cell-substrate adhesion	2	108	0.0577334	0.00146671	0.00375844	["Csf1","Flna"]
GO:0030595	4	leukocyte chemotaxis	2	108	0.0577334	0.00146671	0.00375844	["Cxcl1","Cxcl2"]
GO:1900182	6	positive regulation of protein localization to nucleus	2	109	0.058268	0.00149368	0.00380772	["Flna","Il12b"]
GO:0009725	4	response to hormone	4	1009	0.53938	0.00150293	0.00381156	["Cxcl1","Cxcl2","Dag1","Ncor2"]
GO:0065009	3	regulation of molecular function	6	2740	1.46472	0.00157583	0.00397595	["Cd40","Csf1","Cxcl1","Dusp4","Flna","Plau"]
GO:0046824	8	positive regulation of nucleocytoplasmic transport	2	114	0.0609408	0.0016321	0.00409689	["Flna","Il12b"]
GO:0032507	5	maintenance of protein location in cell	2	115	0.0614754	0.00166049	0.00412606	["Dag1","Flna"]
GO:0070661	4	leukocyte proliferation	2	115	0.0614754	0.00166049	0.00412606	["Cd40","Csf1"]
GO:0030003	7	cellular cation homeostasis	3	468	0.250178	0.00172163	0.0042565	["Cd40","Cxcl1","Cxcl2"]
GO:0007155	3	cell adhesion	4	1049	0.560763	0.00173578	0.00427001	["Dag1","Flna","Il12b","Vcam1"]
GO:0002761	7	regulation of myeloid leukocyte differentiation	2	118	0.0630791	0.00174709	0.00427645	["Csf1","Il12b"]
GO:0043900	4	regulation of multi-organism process	3	472	0.252316	0.00176411	0.00428211	["Cxcl1","Il12b","Plau"]
GO:0051716	3	cellular response to stimulus	6	2810	1.50214	0.00180146	0.00428211	["Cd40","Cxcl2","Dusp4","Il12b","Plau","Vcam1"]
GO:0002706	7	regulation of lymphocyte mediated immunity	2	120	0.0641483	0.001806	0.00428211	["Cd40","Il12b"]
GO:0002822	7	regulation of adaptive immune response based on somatic recombination of immune receptors built from immunoglobulin superfamily domains	2	120	0.0641483	0.001806	0.00428211	["Cd40","Il12b"]
GO:0016337	4	single organismal cell-cell adhesion	3	476	0.254455	0.00180725	0.00428211	["Flna","Il12b","Vcam1"]
GO:0050865	5	regulation of cell activation	3	476	0.254455	0.00180725	0.00428211	["Cd40","Il12b","Vcam1"]
GO:0022610	2	biological adhesion	4	1061	0.567177	0.00181032	0.00428211	["Dag1","Flna","Il12b","Vcam1"]
GO:0006873	6	cellular ion homeostasis	3	480	0.256593	0.00185105	0.00435749	["Cd40","Cxcl1","Cxcl2"]
GO:0045185	4	maintenance of protein location	2	122	0.0652174	0.00186585	0.00437141	["Dag1","Flna"]
GO:0080090	5	regulation of primary metabolic process	8	5345	2.85727	0.00198069	0.00457137	["Cd40","Csf1","Dag1","Dusp4","Flna","Il12b","Ncor2","Ubp1"]
GO:0031401	8	positive regulation of protein modification process	4	1088	0.581611	0.00198627	0.00457137	["Cd40","Csf1","Il12b","Ncor2"]
GO:0042060	5	wound healing	2	126	0.0673557	0.00198836	0.00457137	["Cxcl2","Plau"]
GO:0051651	4	maintenance of location in cell	2	126	0.0673557	0.00198836	0.00457137	["Dag1","Flna"]
GO:0055065	8	metal ion homeostasis	3	501	0.267819	0.00209198	0.00476507	["Cd40","Cxcl1","Cxcl2"]
GO:0098602	3	single organism cell adhesion	3	501	0.267819	0.00209198	0.00476507	["Flna","Il12b","Vcam1"]
GO:0002819	6	regulation of adaptive immune response	2	131	0.0700285	0.00214677	0.00486732	["Cd40","Il12b"]
GO:0060255	5	regulation of macromolecule metabolic process	8	5423	2.89897	0.00219006	0.0049427	["Cd40","Csf1","Dag1","Dusp4","Flna","Il12b","Ncor2","Ubp1"]
GO:0031325	6	positive regulation of cellular metabolic process	6	2954	1.57912	0.00234479	0.00526775	["Cd40","Csf1","Cxcl1","Il12b","Ncor2","Plau"]
GO:0042129	8	regulation of T cell proliferation	2	138	0.0737705	0.0023783	0.00531875	["Il12b","Vcam1"]
GO:0048869	4	cellular developmental process	6	2973	1.58927	0.00242508	0.00539882	["Csf1","Dag1","Flna","Il12b","Ncor2","Vcam1"]
GO:1902107	7	positive regulation of leukocyte differentiation	2	142	0.0759088	0.0025157	0.00557534	["Csf1","Il12b"]
GO:0051607	4	defense response to virus	2	144	0.0769779	0.00258579	0.00570496	["Cd40","Il12b"]
GO:0031589	4	cell-substrate adhesion	2	147	0.0785816	0.00269263	0.00591418	["Dag1","Vcam1"]
GO:0055080	7	cation homeostasis	3	555	0.296686	0.00279942	0.0061214	["Cd40","Cxcl1","Cxcl2"]
GO:0043409	8	negative regulation of MAPK cascade	2	151	0.0807199	0.00283831	0.00617897	["Dag1","Dusp4"]
GO:0048523	5	negative regulation of cellular process	7	4294	2.29544	0.00298162	0.0063946	["Cxcl1","Dag1","Dusp4","Flna","Il12b","Ncor2","Ubp1"]
GO:0043902	5	positive regulation of multi-organism process	2	155	0.0828582	0.00298764	0.0063946	["Cxcl1","Plau"]
GO:0048754	5	branching morphogenesis of an epithelial tube	2	155	0.0828582	0.00298764	0.0063946	["Csf1","Dag1"]
GO:0050778	6	positive regulation of immune response	3	568	0.303635	0.00298935	0.0063946	["Cd40","Dusp4","Il12b"]
GO:0098771	7	inorganic ion homeostasis	3	572	0.305773	0.00304936	0.00649473	["Cd40","Cxcl1","Cxcl2"]
GO:0042113	5	B cell activation	2	161	0.0860656	0.00321846	0.00679606	["Cd40","Vcam1"]
GO:2000377	6	regulation of reactive oxygen species metabolic process	2	161	0.0860656	0.00321846	0.00679606	["Cxcl1","Plau"]
GO:0048545	5	response to steroid hormone	3	586	0.313257	0.0032653	0.0068655	["Cxcl1","Cxcl2","Ncor2"]
GO:1903035	6	negative regulation of response to wounding	2	164	0.0876693	0.00333693	0.00698625	["Il12b","Plau"]
GO:0050731	10	positive regulation of peptidyl-tyrosine phosphorylation	2	165	0.0882038	0.00337687	0.00703991	["Cd40","Il12b"]
GO:0050801	6	ion homeostasis	3	598	0.319672	0.00345778	0.00717818	["Cd40","Cxcl1","Cxcl2"]
GO:2000027	6	regulation of organ morphogenesis	2	171	0.0914113	0.00362125	0.0074775	["Csf1","Plau"]
GO:0042306	8	regulation of protein import into nucleus	2	172	0.0919458	0.00366276	0.0074775	["Flna","Il12b"]
GO:0043279	5	response to alkaloid	2	172	0.0919458	0.00366276	0.0074775	["Plau","Vcam1"]
GO:0051235	3	maintenance of location	2	172	0.0919458	0.00366276	0.0074775	["Dag1","Flna"]
GO:0050878	4	regulation of body fluid levels	3	620	0.331433	0.00382866	0.00778389	["Flna","Ncor2","Plau"]
GO:0061138	5	morphogenesis of a branching epithelium	2	177	0.0946187	0.00387369	0.00784304	["Csf1","Dag1"]
GO:0016032	4	viral process	3	626	0.33464	0.00393391	0.00789992	["Dag1","Ubp1","Vcam1"]
GO:0044403	4	symbiosis, encompassing mutualism through parasitism	3	626	0.33464	0.00393391	0.00789992	["Dag1","Ubp1","Vcam1"]
GO:0044764	3	multi-organism cellular process	3	631	0.337313	0.00402297	0.00804593	["Dag1","Ubp1","Vcam1"]
GO:0009408	4	response to heat	2	181	0.0967569	0.00404646	0.00806015	["Cxcl1","Cxcl2"]
GO:0009749	8	response to glucose	2	183	0.0978261	0.00413417	0.00820166	["Plau","Vcam1"]
GO:0050870	8	positive regulation of T cell activation	2	184	0.0983607	0.00417836	0.00825604	["Il12b","Vcam1"]
GO:0048585	5	negative regulation of response to stimulus	4	1339	0.715788	0.00423706	0.00831455	["Dag1","Dusp4","Il12b","Plau"]
GO:0098609	4	cell-cell adhesion	3	643	0.343728	0.00424177	0.00831455	["Flna","Il12b","Vcam1"]
GO:0007204	11	positive regulation of cytosolic calcium ion concentration	2	186	0.0994298	0.00426741	0.0083316	["Cxcl1","Cxcl2"]
GO:0001763	4	morphogenesis of a branching structure	2	187	0.0999644	0.00431226	0.00838554	["Csf1","Dag1"]
GO:0080134	5	regulation of response to stress	4	1347	0.720064	0.00432912	0.00838554	["Cxcl1","Dusp4","Il12b","Plau"]
GO:0034112	8	positive regulation of homotypic cell-cell adhesion	2	188	0.100499	0.00435733	0.00840709	["Il12b","Vcam1"]
GO:0009967	6	positive regulation of signal transduction	4	1353	0.723272	0.00439907	0.00842838	["Cd40","Csf1","Flna","Il12b"]
GO:1903039	8	positive regulation of leukocyte cell-cell adhesion	2	189	0.101033	0.00440263	0.00842838	["Il12b","Vcam1"]
GO:0032270	7	positive regulation of cellular protein metabolic process	4	1355	0.724341	0.00442256	0.00843372	["Cd40","Csf1","Il12b","Ncor2"]
GO:0009746	7	response to hexose	2	190	0.101568	0.00444815	0.00844976	["Plau","Vcam1"]
GO:1900180	7	regulation of protein localization to nucleus	2	194	0.103706	0.00463241	0.00875061	["Flna","Il12b"]
GO:0043408	7	regulation of MAPK cascade	3	664	0.354954	0.00464209	0.00875061	["Cd40","Dag1","Dusp4"]
GO:0045637	6	regulation of myeloid cell differentiation	2	196	0.104775	0.00472586	0.00887452	["Csf1","Il12b"]
GO:0010605	6	negative regulation of macromolecule metabolic process	5	2308	1.23378	0.004874	0.00908337	["Dag1","Dusp4","Flna","Ncor2","Ubp1"]
GO:0031324	6	negative regulation of cellular metabolic process	5	2308	1.23378	0.004874	0.00908337	["Dag1","Dusp4","Flna","Ncor2","Ubp1"]
GO:0048856	3	anatomical structure development	6	3413	1.82448	0.00496194	0.00921235	["Csf1","Cxcl1","Dag1","Ncor2","Plau","Vcam1"]
GO:0034284	6	response to monosaccharide	2	205	0.109587	0.0051572	0.00953889	["Plau","Vcam1"]
GO:0030168	5	platelet activation	2	210	0.112259	0.00540445	0.00995876	["Cd40","Flna"]
GO:0051247	7	positive regulation of protein metabolic process	4	1448	0.774056	0.00561298	0.0103044	["Cd40","Csf1","Il12b","Ncor2"]
GO:0045859	7	regulation of protein kinase activity	3	712	0.380613	0.0056422	0.0103196	["Cd40","Csf1","Dusp4"]
GO:0043903	5	regulation of symbiosis, encompassing mutualism through parasitism	2	216	0.115467	0.00570827	0.0103261	["Cxcl1","Il12b"]
GO:0046822	8	regulation of nucleocytoplasmic transport	2	216	0.115467	0.00570827	0.0103261	["Flna","Il12b"]
GO:0044419	3	interspecies interaction between organisms	3	715	0.382217	0.00570872	0.0103261	["Dag1","Ubp1","Vcam1"]
GO:0002831	5	regulation of response to biotic stimulus	2	223	0.119209	0.00607251	0.0109439	["Cxcl1","Il12b"]
GO:0022409	7	positive regulation of cell-cell adhesion	2	224	0.119743	0.0061254	0.0109589	["Il12b","Vcam1"]
GO:0051480	10	cytosolic calcium ion homeostasis	2	224	0.119743	0.0061254	0.0109589	["Cxcl1","Cxcl2"]
GO:0030098	5	lymphocyte differentiation	2	225	0.120278	0.0061785	0.0110138	["Il12b","Vcam1"]
GO:0050730	9	regulation of peptidyl-tyrosine phosphorylation	2	227	0.121347	0.00628534	0.0111639	["Cd40","Il12b"]
GO:0009615	4	response to virus	2	231	0.123485	0.00650158	0.0115064	["Cd40","Il12b"]
GO:0009893	5	positive regulation of metabolic process	6	3604	1.92659	0.00654826	0.0115475	["Cd40","Csf1","Cxcl1","Il12b","Ncor2","Plau"]
GO:0023056	5	positive regulation of signaling	4	1515	0.809872	0.00659545	0.0115892	["Cd40","Csf1","Flna","Il12b"]
GO:0007010	4	cytoskeleton organization	3	756	0.404134	0.00666609	0.0116317	["Cxcl1","Dag1","Flna"]
GO:0010647	6	positive regulation of cell communication	4	1521	0.813079	0.00668878	0.0116317	["Cd40","Csf1","Flna","Il12b"]
GO:0031347	6	regulation of defense response	3	757	0.404669	0.00669058	0.0116317	["Cxcl1","Dusp4","Il12b"]
GO:0009743	5	response to carbohydrate	2	236	0.126158	0.00677664	0.0117398	["Plau","Vcam1"]
GO:0051223	6	regulation of protein transport	3	764	0.408411	0.00686353	0.0118486	["Cd40","Flna","Il12b"]
GO:0043549	6	regulation of kinase activity	3	766	0.40948	0.00691344	0.011893	["Cd40","Csf1","Dusp4"]
GO:0050900	3	leukocyte migration	2	240	0.128297	0.00700049	0.0120008	["Cxcl1","Cxcl2"]
GO:0051384	7	response to glucocorticoid	2	242	0.129366	0.00711367	0.0121525	["Cxcl1","Cxcl2"]
GO:0090316	6	positive regulation of intracellular protein transport	2	243	0.1299	0.00717058	0.0122074	["Flna","Il12b"]
GO:0009266	4	response to temperature stimulus	2	253	0.135246	0.00775113	0.0131502	["Cxcl1","Cxcl2"]
GO:0035239	4	tube morphogenesis	2	258	0.137919	0.00804919	0.0135623	["Csf1","Dag1"]
GO:1902105	6	regulation of leukocyte differentiation	2	258	0.137919	0.00804919	0.0135623	["Csf1","Il12b"]
GO:0031960	6	response to corticosteroid	2	260	0.138988	0.00816987	0.013672	["Cxcl1","Cxcl2"]
GO:0032102	6	negative regulation of response to external stimulus	2	260	0.138988	0.00816987	0.013672	["Il12b","Plau"]
GO:0009611	4	response to wounding	2	262	0.140057	0.00829136	0.0137816	["Cxcl2","Plau"]
GO:1903651	7	positive regulation of cytoplasmic transport	2	262	0.140057	0.00829136	0.0137816	["Flna","Il12b"]
GO:0071363	6	cellular response to growth factor stimulus	2	263	0.140592	0.00835242	0.0138363	["Plau","Vcam1"]
GO:0070201	6	regulation of establishment of protein localization	3	830	0.443692	0.00862812	0.0142451	["Cd40","Flna","Il12b"]
GO:0009892	5	negative regulation of metabolic process	5	2639	1.41073	0.00868605	0.0142928	["Dag1","Dusp4","Flna","Ncor2","Ubp1"]
GO:0001525	4	angiogenesis	2	273	0.145937	0.00897425	0.0147178	["Plau","Ubp1"]
GO:0050863	7	regulation of T cell activation	2	280	0.149679	0.00942165	0.0154002	["Il12b","Vcam1"]
GO:0007159	5	leukocyte cell-cell adhesion	2	282	0.150748	0.0095513	0.0155604	["Il12b","Vcam1"]
GO:0001934	9	positive regulation of protein phosphorylation	3	867	0.463471	0.00972554	0.015792	["Cd40","Csf1","Il12b"]
GO:0045089	7	positive regulation of innate immune response	2	289	0.15449	0.0100114	0.0161496	["Dusp4","Il12b"]
GO:1903037	7	regulation of leukocyte cell-cell adhesion	2	289	0.15449	0.0100114	0.0161496	["Il12b","Vcam1"]
GO:1903533	8	regulation of protein targeting	2	293	0.156629	0.0102788	0.0165266	["Flna","Il12b"]
GO:0060284	6	regulation of cell development	3	893	0.47737	0.0105442	0.016895	["Csf1","Dag1","Flna"]
GO:0007167	7	enzyme linked receptor protein signaling pathway	3	894	0.477904	0.0105765	0.016895	["Csf1","Dusp4","Ncor2"]
GO:0034110	7	regulation of homotypic cell-cell adhesion	2	298	0.159301	0.0106174	0.0169054	["Il12b","Vcam1"]
GO:0042327	9	positive regulation of phosphorylation	3	898	0.480043	0.0107062	0.0169918	["Cd40","Csf1","Il12b"]
GO:0051338	5	regulation of transferase activity	3	904	0.48325	0.0109026	0.0172478	["Cd40","Csf1","Dusp4"]
GO:0034109	5	homotypic cell-cell adhesion	2	304	0.162509	0.0110303	0.0173369	["Flna","Il12b"]
GO:0070848	5	response to growth factor	2	304	0.162509	0.0110303	0.0173369	["Plau","Vcam1"]
GO:0045597	6	positive regulation of cell differentiation	3	909	0.485923	0.0110678	0.0173369	["Csf1","Flna","Il12b"]
GO:0043405	8	regulation of MAP kinase activity	2	305	0.163043	0.0110999	0.0173369	["Cd40","Dusp4"]
GO:0000226	5	microtubule cytoskeleton organization	2	306	0.163578	0.0111696	0.0173906	["Dag1","Flna"]
GO:0035556	6	intracellular signal transduction	4	1768	0.945118	0.0113542	0.0176222	["Cd40","Cxcl1","Dusp4","Flna"]
GO:0030036	5	actin cytoskeleton organization	2	318	0.169993	0.0120214	0.0185992	["Cxcl1","Flna"]
GO:0032880	5	regulation of protein localization	3	948	0.506771	0.0124077	0.0191366	["Cd40","Flna","Il12b"]
GO:1903829	5	positive regulation of cellular protein localization	2	324	0.1732	0.0124579	0.019154	["Flna","Il12b"]
GO:0010769	6	regulation of cell morphogenesis involved in differentiation	2	329	0.175873	0.0128269	0.0196599	["Dag1","Flna"]
GO:0051050	5	positive regulation of transport	3	963	0.51479	0.0129473	0.0197829	["Cxcl1","Flna","Il12b"]
GO:0048589	3	developmental growth	2	335	0.179081	0.0132761	0.0202224	["Csf1","Plau"]
GO:0002009	5	morphogenesis of an epithelium	2	336	0.179615	0.0133516	0.0202747	["Csf1","Dag1"]
GO:0051049	5	regulation of transport	4	1865	0.996971	0.0136604	0.0206797	["Cd40","Cxcl1","Flna","Il12b"]
GO:0032388	6	positive regulation of intracellular transport	2	348	0.18603	0.0142729	0.0215408	["Flna","Il12b"]
GO:0001666	4	response to hypoxia	2	350	0.187099	0.0144292	0.0217099	["Plau","Vcam1"]
GO:0036293	5	response to decreased oxygen levels	2	357	0.190841	0.0149818	0.0224727	["Plau","Vcam1"]
GO:0045088	6	regulation of innate immune response	2	360	0.192445	0.0152215	0.0227628	["Dusp4","Il12b"]
GO:0051248	7	negative regulation of protein metabolic process	3	1024	0.547398	0.0152827	0.0227851	["Dag1","Dusp4","Flna"]
GO:0033157	7	regulation of intracellular protein transport	2	366	0.195652	0.0157058	0.0233452	["Flna","Il12b"]
GO:0001819	6	positive regulation of cytokine production	2	371	0.198325	0.0161146	0.0236768	["Cd40","Il12b"]
GO:0051090	4	regulation of sequence-specific DNA binding transcription factor activity	2	371	0.198325	0.0161146	0.0236768	["Cd40","Flna"]
GO:0030198	5	extracellular matrix organization	2	373	0.199394	0.0162793	0.0236768	["Dag1","Vcam1"]
GO:0010562	7	positive regulation of phosphorus metabolic process	3	1050	0.561297	0.0163476	0.0236768	["Cd40","Csf1","Il12b"]
GO:0045937	8	positive regulation of phosphate metabolic process	3	1050	0.561297	0.0163476	0.0236768	["Cd40","Csf1","Il12b"]
GO:0001933	9	negative regulation of protein phosphorylation	2	374	0.199929	0.016362	0.0236768	["Dag1","Dusp4"]
GO:0022407	6	regulation of cell-cell adhesion	2	374	0.199929	0.016362	0.0236768	["Il12b","Vcam1"]
GO:0030029	4	actin filament-based process	2	374	0.199929	0.016362	0.0236768	["Cxcl1","Flna"]
GO:0043062	4	extracellular structure organization	2	374	0.199929	0.016362	0.0236768	["Dag1","Vcam1"]
GO:0098542	4	defense response to other organism	2	378	0.202067	0.0166945	0.0240871	["Cd40","Il12b"]
GO:0042326	9	negative regulation of phosphorylation	2	402	0.214897	0.0187509	0.0269749	["Dag1","Dusp4"]
GO:1903034	6	regulation of response to wounding	2	412	0.220242	0.0196382	0.0281691	["Il12b","Plau"]
GO:0045892	8	negative regulation of transcription, DNA-templated	3	1130	0.604063	0.0198883	0.0284449	["Flna","Ncor2","Ubp1"]
GO:1902532	7	negative regulation of intracellular signal transduction	2	418	0.22345	0.0201792	0.0287773	["Dag1","Dusp4"]
GO:0048729	4	tissue morphogenesis	2	420	0.224519	0.0203609	0.0289525	["Csf1","Dag1"]
GO:0040007	2	growth	2	429	0.22933	0.0211873	0.0300408	["Csf1","Plau"]
GO:1903507	9	negative regulation of nucleic acid-templated transcription	3	1159	0.619565	0.0212712	0.0300731	["Flna","Ncor2","Ubp1"]
GO:0070482	4	response to oxygen levels	2	433	0.231468	0.0215591	0.0303928	["Plau","Vcam1"]
GO:1902679	8	negative regulation of RNA biosynthetic process	3	1174	0.627584	0.0220074	0.0309175	["Flna","Ncor2","Ubp1"]
GO:0044702	3	single organism reproductive process	3	1175	0.628118	0.022057	0.0309175	["Ncor2","Plau","Vcam1"]
GO:0051222	6	positive regulation of protein transport	2	442	0.236279	0.0224059	0.0313173	["Flna","Il12b"]
GO:0002252	3	immune effector process	2	445	0.237883	0.0226912	0.0316263	["Cd40","Il12b"]
GO:1903649	7	regulation of cytoplasmic transport	2	450	0.240556	0.0231702	0.0322027	["Flna","Il12b"]
GO:0071900	8	regulation of protein serine/threonine kinase activity	2	451	0.241091	0.0232665	0.0322455	["Cd40","Dusp4"]
GO:0007596	5	blood coagulation	2	455	0.243229	0.0236535	0.0325981	["Flna","Plau"]
GO:0050817	4	coagulation	2	455	0.243229	0.0236535	0.0325981	["Flna","Plau"]
GO:0030154	5	cell differentiation	4	2197	1.17445	0.0238283	0.0327472	["Csf1","Il12b","Ncor2","Vcam1"]
GO:0007599	5	hemostasis	2	459	0.245367	0.0240431	0.0329505	["Flna","Plau"]
GO:0045860	8	positive regulation of protein kinase activity	2	460	0.245902	0.024141	0.0329779	["Cd40","Csf1"]
GO:0051253	7	negative regulation of RNA metabolic process	3	1217	0.65057	0.0241972	0.0329779	["Flna","Ncor2","Ubp1"]
GO:0050790	4	regulation of catalytic activity	4	2241	1.19797	0.0254575	0.0345997	["Cd40","Csf1","Cxcl1","Dusp4"]
GO:0002764	6	immune response-regulating signaling pathway	2	474	0.253386	0.0255283	0.0346004	["Cd40","Dusp4"]
GO:0016043	3	cellular component organization	6	4778	2.55417	0.0260457	0.0352046	["Cd40","Cxcl1","Dag1","Flna","Ncor2","Vcam1"]
GO:0044707	3	single-multicellular organism process	6	4823	2.57823	0.0272183	0.0366401	["Csf1","Dag1","Flna","Il12b","Ncor2","Plau"]
GO:0033674	7	positive regulation of kinase activity	2	491	0.262473	0.0272566	0.0366401	["Cd40","Csf1"]
GO:0071840	2	cellular component organization or biogenesis	6	4836	2.58517	0.027564	0.0369522	["Cd40","Cxcl1","Dag1","Flna","Ncor2","Vcam1"]
GO:2000113	8	negative regulation of cellular macromolecule biosynthetic process	3	1283	0.685852	0.027788	0.0371513	["Flna","Ncor2","Ubp1"]
GO:0007017	4	microtubule-based process	2	500	0.267284	0.0281908	0.0375877	["Dag1","Flna"]
GO:0060341	5	regulation of cellular localization	3	1293	0.691197	0.0283564	0.0377063	["Cd40","Flna","Il12b"]
GO:1903827	6	regulation of cellular protein localization	2	504	0.269423	0.0286102	0.0379413	["Flna","Il12b"]
GO:0051707	3	response to other organism	2	507	0.271026	0.0289264	0.0382575	["Cd40","Il12b"]
GO:0032501	2	multicellular organismal process	6	4894	2.61618	0.0291446	0.0384427	["Csf1","Dag1","Flna","Il12b","Ncor2","Plau"]
GO:0022604	5	regulation of cell morphogenesis	2	526	0.281183	0.0309625	0.0407315	["Dag1","Flna"]
GO:0045934	7	negative regulation of nucleobase-containing compound metabolic process	3	1341	0.716857	0.031174	0.0409003	["Flna","Ncor2","Ubp1"]
GO:0010720	7	positive regulation of cell development	2	530	0.283321	0.0313985	0.0410852	["Csf1","Flna"]
GO:0010556	6	regulation of macromolecule biosynthetic process	5	3626	1.93835	0.0321037	0.041841	["Cd40","Flna","Il12b","Ncor2","Ubp1"]
GO:0010558	7	negative regulation of macromolecule biosynthetic process	3	1357	0.72541	0.0321461	0.041841	["Flna","Ncor2","Ubp1"]
GO:0010563	7	negative regulation of phosphorus metabolic process	2	540	0.288667	0.0324992	0.0420779	["Dag1","Dusp4"]
GO:0045936	8	negative regulation of phosphate metabolic process	2	540	0.288667	0.0324992	0.0420779	["Dag1","Dusp4"]
GO:0051172	6	negative regulation of nitrogen compound metabolic process	3	1366	0.730221	0.0327002	0.042227	["Flna","Ncor2","Ubp1"]
GO:0031400	8	negative regulation of protein modification process	2	544	0.290805	0.0329439	0.0424303	["Dag1","Dusp4"]
GO:0009887	4	organ morphogenesis	2	548	0.292944	0.033391	0.0428939	["Csf1","Ncor2"]
GO:0001817	5	regulation of cytokine production	2	558	0.298289	0.0345195	0.0442281	["Cd40","Il12b"]
GO:0043085	5	positive regulation of catalytic activity	3	1414	0.75588	0.0357428	0.0456766	["Cd40","Csf1","Cxcl1"]
GO:0031327	7	negative regulation of cellular biosynthetic process	3	1421	0.759622	0.0361989	0.0461395	["Flna","Ncor2","Ubp1"]
GO:0032386	6	regulation of intracellular transport	2	585	0.312723	0.0376419	0.0478548	["Flna","Il12b"]
GO:0009890	6	negative regulation of biosynthetic process	3	1446	0.772986	0.0378533	0.0479996	["Flna","Ncor2","Ubp1"]
GO:0051347	6	positive regulation of transferase activity	2	592	0.316465	0.0384691	0.048655	["Cd40","Csf1"]
GO:0031326	6	regulation of cellular biosynthetic process	5	3838	2.05167	0.0401035	0.0505921	["Cd40","Flna","Il12b","Ncor2","Ubp1"]
GO:0071704	3	organic substance metabolic process	8	8475	4.53047	0.0405784	0.0510603	["Dag1","Dusp4","Flna","Il12b","Ncor2","Plau","Ubp1","Vcam1"]
GO:0009889	5	regulation of biosynthetic process	5	3890	2.07947	0.0422489	0.0530267	["Cd40","Flna","Il12b","Ncor2","Ubp1"]
GO:0043170	4	macromolecule metabolic process	7	6877	3.67623	0.0430515	0.0538554	["Dag1","Dusp4","Flna","Il12b","Ncor2","Plau","Ubp1"]
GO:0010629	7	negative regulation of gene expression	3	1522	0.813614	0.0431281	0.0538554	["Flna","Ncor2","Ubp1"]
GO:0043065	8	positive regulation of apoptotic process	2	634	0.338917	0.0435808	0.054283	["Cd40","Il12b"]
GO:0043068	7	positive regulation of programmed cell death	2	640	0.342124	0.0443315	0.0550635	["Cd40","Il12b"]
GO:0042981	7	regulation of apoptotic process	3	1540	0.823236	0.0444313	0.0550635	["Cd40","Flna","Il12b"]
GO:0046903	4	secretion	2	642	0.343193	0.0445828	0.0551124	["Flna","Ncor2"]
GO:0010468	6	regulation of gene expression	5	3959	2.11636	0.0452099	0.0557475	["Cd40","Csf1","Flna","Ncor2","Ubp1"]
GO:0043067	6	regulation of programmed cell death	3	1556	0.831789	0.0456069	0.0560965	["Cd40","Flna","Il12b"]
GO:0048609	3	multicellular organismal reproductive process	2	657	0.351212	0.0464853	0.0570343	["Ncor2","Plau"]
GO:0007169	8	transmembrane receptor protein tyrosine kinase signaling pathway	2	670	0.358161	0.0481589	0.0589407	["Csf1","Dusp4"]
GO:0010942	6	positive regulation of cell death	2	676	0.361368	0.048939	0.0597468	["Cd40","Il12b"]
GO:0040008	4	regulation of growth	2	680	0.363507	0.0494617	0.0602355	["Csf1","Il12b"]
