# Supplementary material for: Macrophage mediated recognition and clearance of Borrelia burgdorferi elicits MyD88-dependent and -independent phagosomal signals that contribute to phagocytosis and inflammation
Source: BMC Immunol. 2021 May 17;22:32. doi: 10.1186/s12865-021-00418-8 (PMC8127205; doi:10.1186/s12865-021-00418-8)
Supplement: Supplementary file 4 — Additional file 4: Supplemental File 4. Identified differentially expressed genes. [file 12865_2021_418_MOESM4_ESM.xlsx]

## Sheet: MyD88 Dependent DEGs 
ID	Entrez ID	Ensembl ID	baseMean	WT_UN	WT_10	foldChange	log2FoldChange	pval	padj
0610009O20Rik	66839	ENSMUSG00000024442	221.951	304.607	139.296	0.457297	-1.1288	0.0174099	0.0993384
0610010K14Rik	104457	ENSMUSG00000020831	93.1728	139.987	46.3588	0.331166	-1.59438	0.00619884	0.0502491
1110008P14Rik	73737	ENSMUSG00000039195	229.848	355.668	104.027	0.292484	-1.77357	0.000149187	0.00307297
1110032F04Rik	68725	ENSMUSG00000046999	9.4517	0.243843	18.6595	76.5229	6.25782	0.00702156	0.0546088
1110051M20Rik	228356	ENSMUSG00000040591	75.6615	112.967	38.3557	0.33953	-1.55839	0.017041	0.0978786
1700017B05Rik	74211	ENSMUSG00000032300	1061.87	1478.14	645.594	0.436761	-1.19508	0.00158213	0.0183695
1700025G04Rik	69399	ENSMUSG00000032666	308.276	443.972	172.579	0.388717	-1.36321	0.00234786	0.0247246
1700037H04Rik	67326	ENSMUSG00000027327	244.948	361.239	128.657	0.356154	-1.48943	0.0019369	0.0213985
1810011H11Rik	69069	ENSMUSG00000041707	456.747	750.154	163.34	0.217742	-2.19931	4.38204e-07	2.20669e-05
1810013L24Rik	69053	ENSMUSG00000022507	1383.31	953.158	1813.47	1.90259	0.927962	0.0149038	0.0901463
1810022K09Rik	69126	ENSMUSG00000078784	2179.5	953.556	3405.45	3.57132	1.83646	0.0140035	0.0867334
2210016L21Rik	72357	ENSMUSG00000029559	371.571	507.436	235.707	0.464506	-1.10623	0.00855746	0.0627076
2310011J03Rik	66374	ENSMUSG00000020133	161.713	237.133	86.2925	0.363899	-1.45839	0.00428535	0.0380693
2310022A10Rik	66367	ENSMUSG00000049643	734.671	1255.69	213.648	0.170144	-2.55518	1.11388e-09	1.12185e-07
2310061I04Rik	69662	ENSMUSG00000050705	172.751	244.245	101.256	0.414568	-1.27032	0.0101287	0.070156
2410015M20Rik	224904	ENSMUSG00000049760	145.574	229.009	62.139	0.271339	-1.88183	0.000241187	0.00446377
2610507B11Rik	72503	ENSMUSG00000010277	11889.7	15395.7	8383.64	0.544545	-0.876877	0.0164569	0.0957215
2700049A03Rik	76967	ENSMUSG00000034601	260.999	360.255	161.743	0.44897	-1.15531	0.0105142	0.0719343
2810428I15Rik	66462	ENSMUSG00000058833	198.487	321.629	75.3455	0.234262	-2.0938	1.52918e-05	0.000463924
2900011O08Rik	67254	ENSMUSG00000044117	16.806	1.8534	31.7585	17.1353	4.0989	0.0129507	0.0827229
2900026A02Rik	243219	ENSMUSG00000051339	463.669	831.261	96.0771	0.11558	-3.11304	2.23721e-12	3.83526e-10
4921501E09Rik	74042	ENSMUSG00000023350	7.2601	0	14.5202	NaN	NaN	0.0108641	0.0738612
4930404N11Rik	432479	ENSMUSG00000020234	683.502	1237.21	129.794	0.104908	-3.2528	6.21442e-14	1.53789e-11
4930452B06Rik	74430	ENSMUSG00000021747	9.02138	0.243843	17.7989	72.9935	6.1897	0.00889086	0.0642846
4930503L19Rik	269033	ENSMUSG00000044906	535.31	351.564	719.056	2.04531	1.03232	0.0120092	0.079071
4931406C07Rik	70984	ENSMUSG00000031938	732.975	968.695	497.255	0.513324	-0.962058	0.0173109	0.0989695
4931408C20Rik	210940	ENSMUSG00000073722	12.9648	1.6356	24.294	14.8532	3.8927	0.0120785	0.0792561
4931409K22Rik	231045	ENSMUSG00000038199	11.6848	0.913674	22.4559	24.5776	4.61927	0.0133962	0.0842944
5031439G07Rik	223739	ENSMUSG00000036046	4793.73	6944.62	2642.84	0.38056	-1.3938	0.000162557	0.0032782
5730409E04Rik	230757	ENSMUSG00000073755	316.273	428.439	204.107	0.476398	-1.06976	0.0138625	0.0862262
5730508B09Rik	70617	ENSMUSG00000050549	273.742	160.522	386.963	2.41065	1.26942	0.00670896	0.0530924
6430548M08Rik	234797	ENSMUSG00000031824	1009.96	1557.45	462.472	0.296942	-1.75175	1.01251e-05	0.000329382
8030462N17Rik	212163	ENSMUSG00000047466	648.702	421.69	875.714	2.07668	1.05428	0.00946196	0.0670936
9030617O03Rik	217830	ENSMUSG00000021185	350.928	496.636	205.22	0.413219	-1.27502	0.00347264	0.0329913
9430015G10Rik	230996	ENSMUSG00000059939	72.3242	109.701	34.9473	0.318568	-1.65033	0.0103588	0.0712304
9930111J21Rik1	667214	ENSMUSG00000069893	1116.22	1646.34	586.107	0.356007	-1.49002	0.000180131	0.00354995
A830080D01Rik	382252	ENSMUSG00000044150	455.322	266.896	643.748	2.41198	1.27022	0.00278373	0.0280364
Aaed1	66129	ENSMUSG00000021482	374.369	564.85	183.887	0.325551	-1.61904	0.00238449	0.0249285
Aagab	66939	ENSMUSG00000037257	1089.75	1601.88	577.615	0.360586	-1.47159	0.000163566	0.00329088
Aanat	11298	ENSMUSG00000020804	89.5554	11.1727	167.938	15.0311	3.90988	0.0106365	0.0726276
Aarsd1	69684	ENSMUSG00000075528	190.274	281.069	99.4788	0.353931	-1.49846	0.0018365	0.0204985
Aatk	11302	ENSMUSG00000025375	228.58	382.559	74.6006	0.195004	-2.35842	1.84745e-06	7.51253e-05
Abca1	11303	ENSMUSG00000015243	12652	5880.37	19423.6	3.30313	1.72384	1.45778e-06	6.11458e-05
Abca12	74591	ENSMUSG00000050296	25.7905	3.19306	48.3879	15.1541	3.92163	0.00725635	0.0558674
Abca13	268379	ENSMUSG00000004668	56.9944	18.0986	95.8902	5.29821	2.40551	0.0131712	0.0834546
Abca15	320631	ENSMUSG00000054746	14.4944	2.67932	26.3095	9.81946	3.29564	0.0172844	0.098874
Abca2	11305	ENSMUSG00000026944	949.386	1498.82	399.952	0.266845	-1.90593	1.92625e-06	7.77819e-05
Abcb5	77706	ENSMUSG00000072791	12.4896	0.425989	24.5533	57.6384	5.84896	0.0127158	0.0816742
Abcb8	74610	ENSMUSG00000028973	160.847	250.729	70.9663	0.28304	-1.82092	0.000342329	0.00580819
Abcc1	17250	ENSMUSG00000023088	5645.31	3546.63	7744	2.18348	1.12663	0.00310244	0.030227
Abcc3	76408	ENSMUSG00000020865	2458.87	4072.08	845.672	0.207676	-2.2676	4.81631e-09	4.08279e-07
Abcc4	239273	ENSMUSG00000032849	1798.85	847.408	2750.3	3.24554	1.69846	1.62254e-05	0.000487129
Abcc5	27416	ENSMUSG00000022822	2874.78	1467.04	4282.53	2.91917	1.54556	0.00471928	0.0411173
Abcc6	27421	ENSMUSG00000030834	11.4652	0.851977	22.0784	25.9143	4.69568	0.00533409	0.0449647
Abcc8	20927	ENSMUSG00000040136	19.2132	1.33966	37.0868	27.6837	4.79097	0.00524759	0.0443434
Abcd1	11666	ENSMUSG00000031378	1260.85	2050.58	471.115	0.229747	-2.12188	4.82122e-05	0.0012017
Abhd12	76192	ENSMUSG00000032046	3521.05	6123.65	918.446	0.149983	-2.73713	0.000158205	0.00320911
Abhd14b	76491	ENSMUSG00000042073	53.8546	82.5931	25.1161	0.304094	-1.71741	0.0171505	0.0983767
Abhd15	67477	ENSMUSG00000000686	117.511	203.65	31.3719	0.154048	-2.69855	0.000143868	0.00298828
Abhd17a	216169	ENSMUSG00000003346	135.729	227.102	44.3568	0.195317	-2.35611	1.19688e-05	0.000374879
Abhd17c	70178	ENSMUSG00000038459	932.965	581.278	1284.65	2.21005	1.14408	0.016488	0.0957819
Abhd2	54608	ENSMUSG00000039202	412.801	595.145	230.457	0.387229	-1.36874	0.0011855	0.0148491
Abhd4	105501	ENSMUSG00000040997	514.282	715.58	312.985	0.437387	-1.19302	0.00372422	0.0344669
Abhd8	64296	ENSMUSG00000007950	59.8817	103.052	16.7114	0.162164	-2.62447	0.000320406	0.00553932
Abi3	66610	ENSMUSG00000018381	301.218	431.72	170.717	0.395436	-1.33848	0.00241487	0.0251399
Abl2	11352	ENSMUSG00000026596	1241.14	1728.61	753.667	0.435995	-1.19762	0.00202611	0.0221498
Abracl	73112	ENSMUSG00000078453	5159.98	1101.13	9218.84	8.37215	3.0656	9.46669e-15	2.77952e-12
Abtb1	80283	ENSMUSG00000030083	146.176	248.73	43.6218	0.175378	-2.51146	0.000477705	0.00753669
Abtb2	99382	ENSMUSG00000032724	207.985	13.9823	401.988	28.7498	4.84548	9.19628e-16	3.25117e-13
Acaa2	52538	ENSMUSG00000036880	381.724	561.88	201.567	0.358736	-1.479	0.00066987	0.00969604
Acads	11409	ENSMUSG00000029545	347.363	523.271	171.456	0.327662	-1.60972	0.000405183	0.00660921
Acap3	140500	ENSMUSG00000029033	283.463	410.891	156.035	0.379747	-1.39689	0.00190798	0.0211195
Accs	329470	ENSMUSG00000040272	71.2516	109.351	33.152	0.303169	-1.7218	0.00835581	0.0615948
Acd	497652	ENSMUSG00000038000	193.997	288.212	99.7829	0.346214	-1.53026	0.00199652	0.0219035
Acot1	26897	ENSMUSG00000072949	21.5203	38.8	4.24059	0.109294	-3.19372	0.0049256	0.0423665
Acot2	171210	ENSMUSG00000021226	212.902	322.765	103.038	0.319236	-1.64731	0.000610467	0.00906956
Acot7	70025	ENSMUSG00000028937	906.912	610.87	1202.95	1.96925	0.977644	0.0134134	0.0843414
Acot9	56360	ENSMUSG00000025287	783.766	422.743	1144.79	2.708	1.43723	0.000291666	0.00515038
Acox3	80911	ENSMUSG00000029098	1454.68	2555.67	353.699	0.138398	-2.85311	3.85256e-05	0.000997578
Acp5	11433	ENSMUSG00000001348	441.405	91.2546	791.555	8.67413	3.11672	0.00521728	0.0441304
Acsf2	264895	ENSMUSG00000076435	115.427	170.642	60.2118	0.352854	-1.50286	0.00811269	0.0603678
Acsl4	50790	ENSMUSG00000031278	6601.49	3265.56	9937.42	3.0431	1.60554	2.48132e-05	0.000685548
Acsl5	433256	ENSMUSG00000024981	4740.81	2570.11	6911.5	2.68918	1.42717	0.000204774	0.00395023
Acss1	68738	ENSMUSG00000027452	95.1103	162.121	28.0992	0.173322	-2.52847	6.07939e-05	0.00146066
Actr10	56444	ENSMUSG00000021076	2106.18	1231.33	2981.02	2.42097	1.27559	0.000697832	0.0100237
Actr1b	226977	ENSMUSG00000037351	599.696	828.809	370.583	0.447128	-1.16124	0.00382259	0.035092
Acvr1b	11479	ENSMUSG00000000532	811.425	467.14	1155.71	2.47401	1.30685	0.00961426	0.0676474
Acvr2a	11480	ENSMUSG00000052155	653.167	372.835	933.498	2.50378	1.32411	0.000762938	0.0106756
Adam12	11489	ENSMUSG00000054555	33.0496	4.16843	61.9309	14.8571	3.89308	0.0174002	0.0993157
Adam15	11490	ENSMUSG00000028041	1804.01	2794.87	813.161	0.290948	-1.78117	2.11908e-06	8.47778e-05
Adam17	11491	ENSMUSG00000052593	12634.1	7559.35	17708.9	2.34265	1.22814	0.000725089	0.0102957
Adam7	11500	ENSMUSG00000022056	11.9766	0.965773	22.9875	23.8022	4.57302	0.0105792	0.0722926
Adam8	11501	ENSMUSG00000025473	12467.2	18927.4	6006.95	0.317367	-1.65577	0.00364034	0.0339747
Adamts10	224697	ENSMUSG00000024299	288.23	486.276	90.1839	0.185458	-2.43083	2.24815e-07	1.21323e-05
Adamts12	239337	ENSMUSG00000047497	15.0462	2.61763	27.4748	10.4961	3.39178	0.00995483	0.0692004
Adamts18	208936	ENSMUSG00000053399	16.2435	2.12994	30.3571	14.2525	3.83315	0.00278603	0.0280432
Adamts19	240322	ENSMUSG00000053441	11.9894	0.913674	23.065	25.2443	4.65788	0.00708557	0.0549187
Adamts4	240913	ENSMUSG00000006403	67.162	4.25618	130.068	30.5598	4.93356	3.9928e-06	0.000148428
Adamts7	108153	ENSMUSG00000032363	27.7158	5.96013	49.4715	8.30041	3.05318	0.00702949	0.0546088
Adamtsl1	77739	ENSMUSG00000066113	22.4918	4.08068	40.9028	10.0235	3.32532	0.0175854	0.099945
Adap1	231821	ENSMUSG00000056413	778.104	1036.74	519.463	0.501052	-0.996967	0.0117925	0.0782688
Adap2	216991	ENSMUSG00000020709	806.789	1321.26	292.314	0.221238	-2.17633	3.60352e-05	0.000951583
Adck1	72113	ENSMUSG00000021044	188.076	278.185	97.9677	0.352168	-1.50566	0.00212772	0.0228509
Adcy3	104111	ENSMUSG00000020654	145.41	225.322	65.4977	0.290685	-1.78247	0.000736144	0.010427
Adcy7	11513	ENSMUSG00000031659	6413.29	8922.27	3904.3	0.437591	-1.19235	0.00104922	0.0136045
Adcy9	11515	ENSMUSG00000005580	549.682	811.656	287.709	0.354471	-1.49626	0.000190469	0.00370731
Add3	27360	ENSMUSG00000025026	512.841	806.35	219.331	0.272005	-1.87829	0.00254873	0.0261252
Adgb	215772	ENSMUSG00000050994	674.853	109.66	1240.05	11.3081	3.49928	0.000145919	0.00301642
Adgrb2	230775	ENSMUSG00000028782	18.9643	2.81917	35.1094	12.4538	3.63851	0.0164481	0.0957215
Adgre1	13733	ENSMUSG00000004730	46431.2	26987.2	65875.3	2.44099	1.28746	0.000422629	0.00682312
Adgrf1	77596	ENSMUSG00000041293	40.0551	1.9478	78.1625	40.1287	5.32656	0.000858731	0.0116773
Adgrg1	14766	ENSMUSG00000031785	111.003	175.738	46.2674	0.263275	-1.92536	0.00281794	0.0282984
Adgrg5	382045	ENSMUSG00000061577	8.51325	0.425989	16.6005	38.9694	5.28427	0.0133835	0.0842469
Adgrg6	215798	ENSMUSG00000039116	412.385	257.279	567.49	2.20574	1.14126	0.00428823	0.0380753
Adgrl2	99633	ENSMUSG00000028184	4458.05	1648.81	7267.29	4.40758	2.13999	1.04795e-08	8.03259e-07
Adgrl3	319387	ENSMUSG00000037605	11.4099	0.939724	21.8801	23.2836	4.54124	0.0158702	0.0938295
Adi1	104923	ENSMUSG00000020629	403.231	581.165	225.297	0.387664	-1.36712	0.00117362	0.014743
Adipor2	68465	ENSMUSG00000030168	992.166	1376.29	608.04	0.441796	-1.17855	0.00176714	0.0199538
Adm	11535	ENSMUSG00000030790	110.612	5.63189	215.592	38.2806	5.25854	0.0103796	0.071295
Adora2a	11540	ENSMUSG00000020178	75.109	2.84522	147.373	51.7966	5.69479	1.81717e-12	3.17968e-10
Adora2b	11541	ENSMUSG00000018500	513.131	59.0687	967.192	16.374	4.03334	1.07425e-07	6.50674e-06
Adprhl2	100206	ENSMUSG00000042558	189.125	260.136	118.115	0.454048	-1.13908	0.0173247	0.0989945
Adra1a	11549	ENSMUSG00000045875	763.027	1390.82	135.236	0.0972347	-3.36239	0.0007456	0.0105179
Adssl1	11565	ENSMUSG00000011148	1102.1	1825.27	378.927	0.207601	-2.26812	1.44308e-07	8.22316e-06
Aebp1	11568	ENSMUSG00000020473	18.9046	4.24658	33.5627	7.90346	2.98248	0.0141265	0.0870553
Aes	14797	ENSMUSG00000054452	2082	2951.97	1212.03	0.410583	-1.28426	0.000750094	0.0105727
AF366264	231201	ENSMUSG00000057116	43.0725	16.404	69.7409	4.25145	2.08796	0.00918775	0.0658227
Aff1	17355	ENSMUSG00000029313	4020.6	2667.31	5373.88	2.01472	1.01058	0.00454534	0.0399285
Agap1	347722	ENSMUSG00000055013	2352.92	3599.29	1106.54	0.307433	-1.70166	6.05916e-06	0.000211619
Agap3	213990	ENSMUSG00000023353	669.65	901.292	438.008	0.485978	-1.04104	0.00880345	0.0639422
Agfg1	15463	ENSMUSG00000026159	2615.42	1557.21	3673.62	2.3591	1.23824	0.0011137	0.0141962
Agfg2	231801	ENSMUSG00000029722	222.412	370.351	74.4736	0.201089	-2.31409	1.65848e-06	6.80801e-05
Ago3	214150	ENSMUSG00000028842	3299.38	1474.07	5124.69	3.47655	1.79766	0.00137463	0.0166058
Ago4	76850	ENSMUSG00000042500	450.37	731.61	169.129	0.231174	-2.11295	2.76994e-05	0.000750917
Agpat1	55979	ENSMUSG00000034254	921.229	1297.77	544.689	0.419712	-1.25253	0.00135375	0.0164707
Agpat2	67512	ENSMUSG00000026922	94.7915	142.372	47.2106	0.331599	-1.59249	0.00552287	0.046174
Agpat5	52123	ENSMUSG00000031467	1254.26	738.754	1769.77	2.39562	1.2604	0.00150301	0.017712
Ahctf1	226747	ENSMUSG00000026491	2878.85	1978.16	3779.54	1.91063	0.934048	0.012045	0.0791407
Ahcyl2	74340	ENSMUSG00000029772	1800.55	2352.91	1248.19	0.530487	-0.914611	0.0112269	0.0756632
Ahnak	66395	ENSMUSG00000069833	79186.9	111994	46379.8	0.414128	-1.27185	0.000656616	0.00953441
Ahr	11622	ENSMUSG00000019256	512.456	139.415	885.497	6.35151	2.6671	0.000593709	0.00884335
Ahsa1	217737	ENSMUSG00000021037	2564.54	3885.78	1243.31	0.319964	-1.64402	1.27531e-05	0.000394503
AI413582	106672	ENSMUSG00000062753	397.227	552.533	241.92	0.437839	-1.19153	0.00445418	0.0392752
AI467606	101602	ENSMUSG00000045165	401.747	616.625	186.868	0.303049	-1.72238	6.27418e-05	0.00149501
AI837181	107242	ENSMUSG00000047423	141.803	227.115	56.49	0.248728	-2.00736	0.000129672	0.0027261
Aim1	11630	ENSMUSG00000019866	1596.68	2223.79	969.574	0.436001	-1.1976	0.00401002	0.0362421
Akap6	238161	ENSMUSG00000061603	124.278	41.1906	207.365	5.03428	2.33178	0.00103741	0.013512
Akna	100182	ENSMUSG00000039158	2278.36	1532.31	3024.4	1.97375	0.980941	0.00756351	0.0573445
Akr1c18	105349	ENSMUSG00000021214	9.92718	0.425989	19.4284	45.6077	5.51121	0.00546567	0.0458064
Akr7a5	110198	ENSMUSG00000028743	96.1705	157.211	35.1298	0.223456	-2.16194	0.000372045	0.00620899
Akt1s1	67605	ENSMUSG00000011096	264.611	403.725	125.497	0.310847	-1.68572	0.000163518	0.00329088
Alas1	11655	ENSMUSG00000032786	5684.04	1270.19	10097.9	7.94988	2.99093	1.62012e-07	9.05183e-06
Aldh16a1	69748	ENSMUSG00000007833	277.661	405.359	149.963	0.369951	-1.43459	0.00155357	0.0180985
Aldh1a2	19378	ENSMUSG00000013584	13.9938	0.425989	27.5616	64.7003	6.0157	0.000512626	0.00787953
Aldh1l1	107747	ENSMUSG00000030088	137.154	196.226	78.0819	0.397918	-1.32946	0.0119561	0.0789013
Aldh2	11669	ENSMUSG00000029455	3392.18	5598.64	1185.72	0.211787	-2.23931	3.58219e-06	0.000135195
Aldh3a2	11671	ENSMUSG00000010025	687.641	995.413	379.87	0.381621	-1.38979	0.000590618	0.00881676
Aldh4a1	212647	ENSMUSG00000028737	133.534	206.454	60.6134	0.293593	-1.76811	0.000821592	0.0113135
Alg10b	380959	ENSMUSG00000075470	609.593	864.65	354.536	0.410034	-1.28618	0.00103161	0.0134771
Alg11	207958	ENSMUSG00000063362	589.167	348.064	830.269	2.38539	1.25422	0.00254831	0.0261252
Alox5ap	11690	ENSMUSG00000060063	2121.31	3089.8	1152.81	0.373101	-1.42236	0.000168072	0.00336433
Alpk1	71481	ENSMUSG00000028028	1338.48	897.926	1779.03	1.98127	0.986423	0.00941013	0.0668354
Alpk2	225638	ENSMUSG00000032845	34.1872	6.62996	61.7445	9.31294	3.21924	0.000509792	0.00786619
Als2cl	235633	ENSMUSG00000044037	437.77	675.205	200.335	0.296702	-1.75291	0.00181653	0.0202887
Ambp	11699	ENSMUSG00000028356	12.3617	0	24.7234	NaN	NaN	0.00041278	0.00670489
Amdhd2	245847	ENSMUSG00000036820	649.176	1088.66	209.697	0.19262	-2.37617	0.000386783	0.00638727
Amot	27494	ENSMUSG00000041688	100.589	152.363	48.8161	0.320395	-1.64208	0.00493874	0.04242
Anapc10	68999	ENSMUSG00000036977	525.593	316.942	734.244	2.31665	1.21204	0.00308561	0.0300969
Anapc11	66156	ENSMUSG00000025135	585.711	775.89	395.533	0.50978	-0.972052	0.0142821	0.0877961
Anapc2	99152	ENSMUSG00000026965	1304.35	1890.56	718.136	0.379853	-1.39649	0.000251709	0.00462882
Ang	11727	ENSMUSG00000072115	42.0449	68.9593	15.1306	0.219413	-2.18828	0.00766585	0.0578629
Angpt2	11601	ENSMUSG00000031465	152.962	215.509	90.4138	0.419535	-1.25314	0.0145706	0.0888777
Angptl2	26360	ENSMUSG00000004105	1780.39	3223.85	336.939	0.104515	-3.25822	5.25049e-16	1.9352e-13
Angptl4	57875	ENSMUSG00000002289	146.298	278.578	14.0177	0.0503188	-4.31276	0.0133139	0.0839596
Ank	11732	ENSMUSG00000022265	1271.58	2077.77	465.392	0.223987	-2.15852	1.08728e-07	6.5399e-06
Ankar	319695	ENSMUSG00000039342	15.9652	2.92317	29.0073	9.92323	3.31081	0.0156373	0.092928
Ankmy2	217473	ENSMUSG00000036188	289.087	415.157	163.017	0.392664	-1.34863	0.00281955	0.0282984
Ankrd13b	268445	ENSMUSG00000037907	250.951	391.93	109.971	0.28059	-1.83347	0.000135097	0.00282642
Ankrd13d	68423	ENSMUSG00000005986	100.985	147.512	54.4576	0.369173	-1.43763	0.00991087	0.0690056
Ankrd33b	67434	ENSMUSG00000022237	854.946	536.083	1173.81	2.1896	1.13067	0.00295925	0.0292932
Ankrd45	73844	ENSMUSG00000044835	9.26361	0.669831	17.8574	26.6596	4.73658	0.0175304	0.0997857
Anks6	75691	ENSMUSG00000066191	67.8429	105.329	30.3563	0.288204	-1.79484	0.00507547	0.0433115
Anp32a	11737	ENSMUSG00000032249	5957.5	3313.28	8601.72	2.59613	1.37636	0.000243329	0.0044938
Antxr1	69538	ENSMUSG00000033420	140.375	14.704	266.046	18.0935	4.1774	9.64736e-06	0.000315323
Anxa3	11745	ENSMUSG00000029484	4076.3	2819.06	5333.54	1.89196	0.919878	0.0126059	0.0813571
Aoah	27052	ENSMUSG00000021322	1958.62	259.364	3657.88	14.1033	3.81796	4.07912e-06	0.000151312
Ap1b1	11764	ENSMUSG00000009090	3295.91	4455.53	2136.29	0.47947	-1.06049	0.00547692	0.0458785
Ap1s1	11769	ENSMUSG00000004849	867.775	1168.27	567.284	0.485577	-1.04223	0.00634466	0.0511917
Ap1s3	252903	ENSMUSG00000054702	1202.42	558.855	1845.98	3.30314	1.72384	0.0100318	0.0696519
Ap2a1	11771	ENSMUSG00000060279	645.878	875.086	416.67	0.476148	-1.07052	0.00597961	0.0489994
Ap3s1	11777	ENSMUSG00000024480	3464.65	2170.56	4758.74	2.1924	1.13251	0.00273659	0.0277065
Ap4m1	11781	ENSMUSG00000019518	196.74	274.226	119.254	0.434873	-1.20133	0.0126978	0.0815892
Ap5b1	381201	ENSMUSG00000049562	213.633	319.496	107.77	0.337313	-1.56784	0.000956704	0.0127191
Ap5s1	69596	ENSMUSG00000068264	99.5449	153.045	46.0449	0.300859	-1.73284	0.00277481	0.0279628
Ap5z1	231855	ENSMUSG00000039623	310.115	441.397	178.832	0.40515	-1.30347	0.00305944	0.029909
Apba2	11784	ENSMUSG00000030519	39.1975	11.8551	66.5399	5.61279	2.48872	0.015121	0.0908572
Apeh	235606	ENSMUSG00000032590	364.224	554.134	174.314	0.314569	-1.66855	0.00011917	0.00254235
Aplp2	11804	ENSMUSG00000031996	7669.2	11058.5	4279.9	0.387024	-1.36951	0.000207923	0.00398435
Apoa1bp	246703	ENSMUSG00000028070	146.911	215.741	78.0814	0.361921	-1.46625	0.00492429	0.0423665
Apobec1	11810	ENSMUSG00000040613	6818.73	11619.2	2018.2	0.173695	-2.52537	4.1297e-11	6.06262e-09
Apoe	11816	ENSMUSG00000002985	23659.3	39222.6	8095.86	0.206408	-2.27643	0.0149561	0.0902877
Appl1	72993	ENSMUSG00000040760	2897.26	1745	4049.52	2.32063	1.21452	0.00115307	0.0145269
Aprt	11821	ENSMUSG00000006589	1221.89	1944.01	499.769	0.257081	-1.9597	3.178e-07	1.64828e-05
Aqp9	64008	ENSMUSG00000032204	39.7225	8.48965	70.9554	8.35787	3.06314	0.000930534	0.0124669
Arap2	212285	ENSMUSG00000037999	315.014	441.965	188.063	0.425516	-1.23271	0.00434222	0.038434
Arfgef3	215821	ENSMUSG00000019852	742.221	1060.96	423.478	0.399145	-1.32502	0.00126505	0.0156085
Arg1	11846	ENSMUSG00000019987	69.9909	15.0977	124.884	8.27174	3.04819	0.00479071	0.0415081
Arg2	11847	ENSMUSG00000021125	108.788	16.7393	200.838	11.998	3.58472	0.00175062	0.019808
Arhgap19	71085	ENSMUSG00000025154	1293.6	2391.04	196.167	0.0820423	-3.60749	7.63757e-06	0.000257906
Arhgap22	239027	ENSMUSG00000063506	712.537	1238.01	187.068	0.151104	-2.72638	6.94856e-11	9.78617e-09
Arhgap24	231532	ENSMUSG00000057315	381.807	640.433	123.181	0.19234	-2.37827	5.28555e-07	2.58649e-05
Arhgap25	232201	ENSMUSG00000030047	1556.9	2540.64	573.155	0.225594	-2.1482	2.70896e-08	1.89223e-06
Arhgap27	544817	ENSMUSG00000034255	354.876	643.422	66.3298	0.103089	-3.27804	1.15288e-12	2.14745e-10
Arhgap31	12549	ENSMUSG00000022799	4363.04	2525.31	6200.77	2.45545	1.29599	0.000331266	0.00568243
Arhgap39	223666	ENSMUSG00000033697	519.968	876.35	163.587	0.186669	-2.42145	2.42933e-08	1.72473e-06
Arhgap9	216445	ENSMUSG00000040345	731.381	1056.23	406.531	0.384888	-1.37749	0.000654955	0.00951828
Arhgdia	192662	ENSMUSG00000025132	5205.42	6762.33	3648.52	0.539536	-0.890209	0.0136716	0.0854683
Arhgef1	16801	ENSMUSG00000040940	1523.97	2267.95	779.994	0.34392	-1.53986	6.21388e-05	0.00148269
Arhgef10l	72754	ENSMUSG00000040964	536.195	865.817	206.574	0.238589	-2.0674	1.59322e-06	6.58698e-05
Arhgef3	71704	ENSMUSG00000021895	1268.08	357.887	2178.27	6.08646	2.6056	1.67851e-10	2.07691e-08
Arhgef6	73341	ENSMUSG00000031133	2169.21	3600.37	738.057	0.204995	-2.28634	3.84334e-07	1.95818e-05
Arhgef7	54126	ENSMUSG00000031511	2110.59	3121.4	1099.79	0.35234	-1.50496	9.64875e-05	0.00211841
Arid1b	239985	ENSMUSG00000069729	2733.69	3992.99	1474.4	0.369247	-1.43734	0.000114229	0.00245203
Arid5a	214855	ENSMUSG00000037447	152.79	84.0453	221.534	2.63589	1.39829	0.00315931	0.0306603
Arid5b	71371	ENSMUSG00000019947	1052.7	715.352	1390.05	1.94317	0.958409	0.00993472	0.0691161
Arl11	219144	ENSMUSG00000043157	462.424	851.036	73.8123	0.0867323	-3.52729	7.86581e-09	6.30831e-07
Arl2	56327	ENSMUSG00000024944	179.657	263.25	96.0645	0.364917	-1.45436	0.00358264	0.0337025
Arl4c	320982	ENSMUSG00000049866	1378.5	2369.96	387.035	0.163308	-2.61433	8.30528e-11	1.11529e-08
Arl5c	217151	ENSMUSG00000038352	260.25	147.214	373.286	2.53567	1.34237	0.00145443	0.0173281
Arpc4	68089	ENSMUSG00000079426	1720.34	2244.93	1195.76	0.532647	-0.908748	0.0125849	0.0813158
Arpp21	74100	ENSMUSG00000032503	19.0627	4.41227	33.7131	7.64077	2.93372	0.0173338	0.0990019
Arrb1	109689	ENSMUSG00000018909	3112.61	4109.37	2115.86	0.514886	-0.957674	0.0107449	0.0731948
Arrdc4	66412	ENSMUSG00000042659	436.502	118.955	754.048	6.33891	2.66424	1.02252e-05	0.00033047
Arsa	11883	ENSMUSG00000022620	502.641	725.065	280.217	0.386472	-1.37157	0.000963956	0.0127959
Arsb	11881	ENSMUSG00000042082	870.094	1175.75	564.439	0.480067	-1.05869	0.0065712	0.0522169
Art2a-ps	11871	ENSMUSG00000092517	110.371	32.7739	187.968	5.73528	2.51986	0.00567232	0.0470128
Ascc1	69090	ENSMUSG00000044475	133.423	190.394	76.4508	0.40154	-1.31639	0.0130715	0.0831267
Ascc3	77987	ENSMUSG00000038774	4871.23	3399.99	6342.47	1.86544	0.899517	0.0132767	0.0838471
Aspscr1	68938	ENSMUSG00000025142	248.13	337.492	158.768	0.470434	-1.08794	0.0150745	0.0906403
Ass1	11898	ENSMUSG00000076441	575.045	82.0686	1068.02	13.0138	3.70197	3.33177e-08	2.2723e-06
Astl	215095	ENSMUSG00000050468	20.2958	0.269892	40.3217	149.399	7.22303	5.7311e-05	0.00139827
Astn1	11899	ENSMUSG00000026587	16.0734	2.12329	30.0235	14.1401	3.82172	0.0100724	0.0699056
Atf3	11910	ENSMUSG00000026628	2932.7	3816.65	2048.76	0.536797	-0.897552	0.0122792	0.0801512
Atf6b	12915	ENSMUSG00000015461	661.913	895.941	427.886	0.477583	-1.06618	0.00715114	0.0553279
Atg101	68118	ENSMUSG00000037204	111.362	162.134	60.5894	0.373699	-1.42005	0.00863739	0.0630589
Atg2a	329015	ENSMUSG00000024773	666.352	940.366	392.339	0.41722	-1.26112	0.00208314	0.0225117
Atg7	74244	ENSMUSG00000030314	718.706	1079.31	358.102	0.331788	-1.59167	7.78395e-05	0.00177423
Atg9b	213948	ENSMUSG00000038295	75.7327	121.678	29.7868	0.244799	-2.03033	0.00137985	0.0166457
Atm	11920	ENSMUSG00000034218	1104.59	1459.54	749.64	0.513615	-0.961242	0.0118939	0.0787607
Atmin	234776	ENSMUSG00000047388	666.316	894.787	437.845	0.489329	-1.03112	0.00942187	0.0668914
Atox1	11927	ENSMUSG00000018585	648.453	988.537	308.368	0.311943	-1.68064	3.89974e-05	0.00100829
Atp10a	11982	ENSMUSG00000025324	267.717	117.093	418.34	3.57272	1.83702	4.20843e-05	0.00106895
Atp13a2	74772	ENSMUSG00000036622	1866.57	3219.71	513.437	0.159467	-2.64867	8.92181e-07	4.03531e-05
Atp1a2	98660	ENSMUSG00000007097	68.407	29.0987	107.715	3.70171	1.88819	0.00430306	0.0381874
Atp1a3	232975	ENSMUSG00000040907	2868.25	4057.05	1679.44	0.413957	-1.27245	0.00758907	0.0575041
Atp1b3	11933	ENSMUSG00000032412	5411.8	3698.17	7125.43	1.92675	0.946167	0.0117882	0.0782688
Atp2b2	11941	ENSMUSG00000030302	17.3815	1.21921	33.5438	27.5127	4.78202	0.00151412	0.0177946
Atp2c1	235574	ENSMUSG00000032570	2873	1952.51	3793.49	1.94288	0.958198	0.0111428	0.0752246
Atp5d	66043	ENSMUSG00000003072	444.317	600.883	287.751	0.478881	-1.06226	0.0118996	0.0787686
Atp5g1	11951	ENSMUSG00000006057	690.42	911.284	469.556	0.515268	-0.956605	0.0140356	0.0868201
Atp5sl	66349	ENSMUSG00000057229	114.321	181.447	47.1954	0.260106	-1.94283	0.000502507	0.00780712
Atp6v0a1	11975	ENSMUSG00000019302	4146.52	6441.09	1851.95	0.28752	-1.79826	4.59341e-06	0.000167519
Atp6v0d2	242341	ENSMUSG00000028238	3678.44	5684.88	1672	0.294113	-1.76556	0.00352495	0.0333858
Atp6v1a	11964	ENSMUSG00000052459	7266.24	10782.6	3749.89	0.347772	-1.52378	0.00243124	0.0252496
Atp6v1e1	11973	ENSMUSG00000019210	2052.89	1410.97	2694.81	1.90989	0.933493	0.0166816	0.0967005
Atp8b1	54670	ENSMUSG00000039529	20.0792	5.07251	35.0859	6.91688	2.79012	0.0150285	0.0904788
Atraid	381629	ENSMUSG00000013622	390.539	569.837	211.241	0.370704	-1.43166	0.000852704	0.0116494
Atrnl1	226255	ENSMUSG00000054843	697.569	372.976	1022.16	2.74056	1.45447	0.000142399	0.00296132
Aup1	11993	ENSMUSG00000068328	824.153	1288.51	359.793	0.279231	-1.84047	4.7826e-06	0.000173687
AW822073	100504180	ENSMUSG00000058537	75.4873	13.579	137.396	10.1183	3.33889	0.0164573	0.0957215
B2m	12010	ENSMUSG00000060802	53008	36552.9	69463	1.90034	0.926261	0.00739522	0.0564925
B3gat3	72727	ENSMUSG00000071649	277.305	409.189	145.422	0.35539	-1.49253	0.000967774	0.0128269
B3gnt3	72297	ENSMUSG00000031803	319.573	495.824	143.323	0.28906	-1.79056	6.56478e-05	0.0015557
B3gnt8	232984	ENSMUSG00000059479	203.683	364.454	42.9113	0.117741	-3.08631	1.84786e-09	1.76853e-07
B4galt1	14595	ENSMUSG00000028413	1749.64	2659.92	839.354	0.315556	-1.66403	1.02928e-05	0.000330803
B4galt4	56375	ENSMUSG00000022793	120.739	190.322	51.1569	0.268791	-1.89544	0.000650696	0.00946433
B4galt6	56386	ENSMUSG00000056124	3565.95	4724.67	2407.23	0.509502	-0.972841	0.00855512	0.0627076
B4gat1	108902	ENSMUSG00000047379	336.297	507.878	164.716	0.324322	-1.6245	0.000241799	0.00447032
Babam1	68251	ENSMUSG00000031820	664.23	875.158	453.301	0.517965	-0.949074	0.0160126	0.094091
Bace2	56175	ENSMUSG00000040605	9.1956	0.669831	17.7214	26.4565	4.72555	0.0169966	0.0977857
Bag6	224727	ENSMUSG00000024392	2074.1	2827.59	1320.61	0.467043	-1.09837	0.00287536	0.0287254
Bahcc1	268515	ENSMUSG00000039741	220.305	316.657	123.952	0.391439	-1.35314	0.00574949	0.0474504
Baiap2	108100	ENSMUSG00000025372	475.189	789.018	161.359	0.204506	-2.28979	1.35322e-07	7.86636e-06
Bak1	12018	ENSMUSG00000057789	673.875	888.072	459.678	0.517613	-0.950054	0.0154597	0.0921254
Bambi	68010	ENSMUSG00000024232	111.858	171.319	52.3977	0.305849	-1.70911	0.00133723	0.0163018
Batf	53314	ENSMUSG00000034266	222.884	31.3818	414.386	13.2047	3.72298	4.29522e-13	8.45524e-11
Batf2	74481	ENSMUSG00000039699	86.5144	46.193	126.836	2.74578	1.45722	0.0100867	0.0699208
Baz1a	217578	ENSMUSG00000035021	3801.74	2124.09	5479.4	2.57965	1.36717	0.000311965	0.00542044
BC005537	79555	ENSMUSG00000019132	7379.63	10646.8	4112.51	0.386269	-1.37232	0.000204245	0.00394441
BC094916	545384	ENSMUSG00000070501	12.8219	1.20962	24.4343	20.2	4.33628	0.00638399	0.0513655
Bcam	57278	ENSMUSG00000002980	30.792	5.98618	55.5977	9.28768	3.21532	0.000743997	0.0105039
Bcap29	12033	ENSMUSG00000020650	1144.62	786.567	1502.67	1.91042	0.933886	0.0168161	0.097037
Bcar3	29815	ENSMUSG00000028121	691.465	1173.61	209.32	0.178356	-2.48717	1.95863e-09	1.85406e-07
Bcas3	192197	ENSMUSG00000059439	351.898	541.028	162.768	0.30085	-1.73288	0.000994087	0.0130657
Bckdha	12039	ENSMUSG00000060376	213.625	342.201	85.0488	0.248535	-2.00848	0.000804759	0.0111349
Bckdk	12041	ENSMUSG00000030802	440.134	647.513	232.755	0.35946	-1.4761	0.000474434	0.0074919
Bcl2a1b	12045	ENSMUSG00000089929	2248.61	378.061	4119.16	10.8955	3.44566	5.1295e-10	5.58858e-08
Bcl2l12	75736	ENSMUSG00000003190	36.0817	63.5949	8.56853	0.134736	-2.89179	0.000886711	0.0120098
Bcl3	12051	ENSMUSG00000053175	292.686	168.142	417.23	2.48141	1.31116	0.00209741	0.0225814
Bcl9l	80288	ENSMUSG00000063382	238.974	377.011	100.937	0.26773	-1.90115	5.81095e-05	0.00140713
Bdp1	544971	ENSMUSG00000049658	5451.16	2959	7943.31	2.68445	1.42463	0.000131614	0.00276024
Bend4	666938	ENSMUSG00000092060	624.208	834.76	413.656	0.495538	-1.01293	0.0128459	0.082266
Bend6	320705	ENSMUSG00000042182	36.9735	4.42228	69.5247	15.7215	3.97467	4.59849e-05	0.00115449
Bhmt	12116	ENSMUSG00000074768	9.10124	0.243843	17.9586	73.6485	6.20258	0.00910088	0.0653626
Blmh	104184	ENSMUSG00000020840	1149.02	782.006	1516.03	1.93864	0.955045	0.0160841	0.0943224
Blnk	17060	ENSMUSG00000061132	1251.06	1751.08	751.03	0.428894	-1.22131	0.00195795	0.021535
Blzf1	66352	ENSMUSG00000026577	689.967	392.93	987.003	2.5119	1.32878	0.00103961	0.0135197
Bmf	171543	ENSMUSG00000040093	283.164	534.042	32.286	0.0604559	-4.04797	1.15975e-05	0.000366611
Bmi1	12151	ENSMUSG00000026739	1656.94	1028.37	2285.51	2.22246	1.15216	0.00334138	0.0319971
Bmp1	12153	ENSMUSG00000022098	58.4342	3.79474	113.074	29.7975	4.89712	0.000501041	0.00779131
Bmp2k	140780	ENSMUSG00000034663	3792.57	2560.44	5024.7	1.96244	0.972648	0.0119654	0.0789047
Bmper	73230	ENSMUSG00000031963	15.0042	1.33966	28.6688	21.4	4.41954	0.0061774	0.0501223
Bmyc	107771	ENSMUSG00000049086	188.482	338.874	38.0899	0.112401	-3.15327	3.6445e-05	0.000958023
Boc	117606	ENSMUSG00000022687	35.629	5.26425	65.9938	12.5362	3.64803	0.00396197	0.036009
Borcs8	10598007672368	ENSMUSG00000002345	231.524	328.155	134.892	0.411062	-1.28257	0.00686849	0.0537727
Braf	109880	ENSMUSG00000002413	2678.78	1503.71	3853.84	2.56289	1.35777	0.0018854	0.0209499
Bri3	55950	ENSMUSG00000047843	2061.55	2731.46	1391.64	0.509487	-0.972883	0.0120472	0.0791407
Brinp1	56710	ENSMUSG00000028351	7.11509	0	14.2302	NaN	NaN	0.0107227	0.0731009
Brinp3	215378	ENSMUSG00000035131	6.52274	0	13.0455	NaN	NaN	0.0157487	0.0933095
Brix1	67832	ENSMUSG00000022247	1363.92	807.239	1920.61	2.37923	1.25049	0.00113365	0.014387
Brk1	101314	ENSMUSG00000033940	1239.65	1689.99	789.308	0.46705	-1.09835	0.00440456	0.038889
Bscl2	14705	ENSMUSG00000071657	411.728	609.782	213.674	0.35041	-1.51289	0.000358064	0.00600459
Bsn	12217	ENSMUSG00000032589	554.787	798.814	310.76	0.389027	-1.36206	0.00274823	0.0277523
Bst1	12182	ENSMUSG00000029082	607.883	76.4651	1139.3	14.8996	3.8972	0.000510396	0.00786619
Btbd2	208198	ENSMUSG00000003344	215.524	357.718	73.3293	0.204992	-2.28636	2.35461e-06	9.22824e-05
Btbd6	399566	ENSMUSG00000002803	129.961	185.214	74.709	0.403366	-1.30984	0.0159713	0.0940334
C130026I21Rik	100041057620078	ENSMUSG00000052477	76.8778	30.2108	123.545	4.08943	2.0319	0.00345664	0.0328646
C1qa	12259	ENSMUSG00000036887	2039.52	2949.28	1129.77	0.383067	-1.38433	0.0103407	0.0711409
C1qb	12260	ENSMUSG00000036905	14672.5	19412.3	9932.78	0.511674	-0.966702	0.0102528	0.0707446
C1qc	12262	ENSMUSG00000036896	4305.47	6411.53	2199.41	0.34304	-1.54355	4.12241e-05	0.00105484
C1ra	50909	ENSMUSG00000055172	195.643	34.932	356.353	10.2013	3.35069	1.57641e-10	1.96461e-08
C2cd3	277939	ENSMUSG00000047248	665.303	907.565	423.041	0.466127	-1.1012	0.00600266	0.0491186
C5ar2	319430	ENSMUSG00000074361	123.635	184.659	62.6108	0.339062	-1.56038	0.00298363	0.0294169
C77080	97130	ENSMUSG00000050390	1627.09	2989.27	264.918	0.0886228	-3.49618	0.0008563	0.0116617
C77370	245555	ENSMUSG00000046449	14.544	2.09724	26.9908	12.8697	3.6859	0.0131636	0.0834369
Cacna1a	12286	ENSMUSG00000034656	763.678	1196.63	330.73	0.276385	-1.85525	8.47628e-06	0.000283882
Cacnb2	12296	ENSMUSG00000057914	21.3896	3.57675	39.2025	10.9604	3.45422	0.00370553	0.034345
Cacnb3	12297	ENSMUSG00000003352	85.1936	30.589	139.798	4.57022	2.19226	0.00179552	0.0201842
Cacul1	78832	ENSMUSG00000033417	2912.49	3824.26	2000.71	0.523161	-0.934672	0.0143473	0.0879525
Cadm1	54725	ENSMUSG00000032076	3056.76	4148.76	1964.75	0.473575	-1.07834	0.00318471	0.030832
Calcoco1	67488	ENSMUSG00000023055	638.829	1042.31	235.35	0.225797	-2.1469	0.00315245	0.0306453
Calcrl	54598	ENSMUSG00000059588	6339.1	2469.55	10208.7	4.1338	2.04747	9.61563e-08	5.90679e-06
Calhm2	72691	ENSMUSG00000033033	219.458	380.187	58.7291	0.154474	-2.69456	6.29376e-08	4.00834e-06
Calu	12321	ENSMUSG00000029767	4696.38	3195.36	6197.4	1.9395	0.955683	0.0114453	0.0767321
Camk1	52163	ENSMUSG00000030272	1065.98	1696.47	435.479	0.256696	-1.96187	1.02897e-06	4.53558e-05
Camk1d	227541	ENSMUSG00000039145	1526.93	2118.58	935.281	0.441466	-1.17963	0.00274882	0.0277523
Cant1	76025	ENSMUSG00000025575	621.518	869.166	373.87	0.430148	-1.2171	0.00223012	0.02373
Capg	12332	ENSMUSG00000056737	11418.3	15382.4	7454.12	0.484587	-1.04517	0.00387387	0.0354314
Capn1	12333	ENSMUSG00000024942	603.352	929.676	277.028	0.297984	-1.74669	2.08822e-05	0.000593994
Capn5	12337	ENSMUSG00000035547	615.608	1041.71	189.508	0.181921	-2.45862	5.27102e-07	2.58649e-05
Car13	71934	ENSMUSG00000027555	2496	529.422	4462.57	8.42913	3.07538	1.38228e-14	3.86214e-12
Car2	12349	ENSMUSG00000027562	59.9967	3.4467	116.547	33.814	5.07955	0.000400318	0.00655454
Casc4	319996	ENSMUSG00000060227	255.651	119.688	391.614	3.27195	1.71015	0.0122057	0.079847
Casp1	12362	ENSMUSG00000025888	2892.56	1393.66	4391.45	3.15101	1.65582	7.37264e-06	0.000249446
Casp2	12366	ENSMUSG00000029863	477.906	726.881	228.932	0.314951	-1.6668	7.07768e-05	0.00164132
Casp3	12367	ENSMUSG00000031628	207.822	295.867	119.778	0.404836	-1.30459	0.0060276	0.0492534
Casp4	12363	ENSMUSG00000033538	1521.2	427.471	2614.92	6.11718	2.61287	1.44581e-11	2.27688e-09
Casp7	12369	ENSMUSG00000025076	310.999	173.792	448.207	2.57898	1.3668	0.00259699	0.0265101
Casp9	12371	ENSMUSG00000028914	515.845	775.024	256.665	0.331171	-1.59435	0.000115349	0.00246691
Cblb	208650	ENSMUSG00000022637	4156.35	6386.51	1926.2	0.301604	-1.72927	4.4152e-06	0.000162387
Cbr1	12408	ENSMUSG00000051483	508.395	751.896	264.893	0.3523	-1.50512	0.0002324	0.00434758
Cbr3	109857	ENSMUSG00000022947	56.683	88.231	25.135	0.284877	-1.81159	0.00870442	0.0633823
Cbx4	12418	ENSMUSG00000039989	221.843	302.776	140.91	0.465391	-1.10348	0.017288	0.098874
Cbx6	494448	ENSMUSG00000089715	98.4981	165.528	31.4683	0.190109	-2.3951	6.85013e-05	0.00161011
Cbx7	52609	ENSMUSG00000053411	74.9348	115.567	34.3026	0.29682	-1.75234	0.00601517	0.0491977
Cbx8	30951	ENSMUSG00000025578	46.0536	74.6859	17.4214	0.233262	-2.09998	0.00765038	0.0578408
Cby1	73739	ENSMUSG00000022428	100.023	147.27	52.7758	0.35836	-1.48052	0.0120385	0.0791407
Cc2d1a	212139	ENSMUSG00000036686	749.373	1021.3	477.441	0.467482	-1.09702	0.00475554	0.0412726
Cc2d1b	319965	ENSMUSG00000028582	1097.51	1477.11	717.916	0.486028	-1.04089	0.00645795	0.0516249
Cc2d2a	231214	ENSMUSG00000039765	161.428	81.4047	241.451	2.96605	1.56854	0.00203794	0.0222033
Ccar1	67500	ENSMUSG00000020074	4313.26	2884.24	5742.28	1.99092	0.993432	0.00755798	0.0573445
Ccdc122	108811	ENSMUSG00000034795	136.784	78.6338	194.935	2.47902	1.30977	0.00977943	0.0685035
Ccdc136	232664	ENSMUSG00000029769	13.9575	2.12329	25.7917	12.147	3.60253	0.0144019	0.0881883
Ccdc146	75172	ENSMUSG00000064280	66.8276	13.4587	120.197	8.93075	3.15878	0.00366217	0.0340778
Ccdc152	100039139	ENSMUSG00000091119	63.3295	97.4416	29.2175	0.299846	-1.7377	0.0159821	0.0940417
Ccdc162	75973	ENSMUSG00000075225	17.7457	1.33966	34.1518	25.4928	4.67202	0.0068367	0.0536621
Ccdc163	68394	ENSMUSG00000028689	99.1638	148.159	50.1689	0.338616	-1.56228	0.00742719	0.0566789
Ccdc22	54638	ENSMUSG00000031143	152.702	228.787	76.6165	0.334881	-1.57828	0.00202994	0.0221498
Ccdc25	67179	ENSMUSG00000022035	782.24	458.659	1105.82	2.41098	1.26962	0.00137684	0.0166209
Ccdc50	67501	ENSMUSG00000038127	6632.79	3121.73	10143.9	3.24944	1.70019	0.000223305	0.00420834
Ccdc58	381045	ENSMUSG00000075229	435.127	237.447	632.807	2.66505	1.41416	0.00114508	0.0144568
Ccdc59	52713	ENSMUSG00000019897	1130.62	779.026	1482.22	1.90266	0.928016	0.0172885	0.098874
Ccdc61	232933	ENSMUSG00000074358	89.181	131.923	46.4394	0.35202	-1.50627	0.0104307	0.0715608
Ccdc97	52132	ENSMUSG00000002608	282.83	400.628	165.033	0.411935	-1.27951	0.00423595	0.0378052
Ccl17	20295	ENSMUSG00000031780	11.9376	1.27797	22.5973	17.6823	4.14423	0.00647974	0.051656
Ccl24	56221	ENSMUSG00000004814	50.7126	8.14552	93.2797	11.4517	3.51748	0.000871381	0.0118206
Ccl3	20302	ENSMUSG00000000982	20122.7	1017.79	39227.7	38.542	5.26836	5.71442e-21	4.49958e-18
Ccl5	20304	ENSMUSG00000035042	3511.34	209.206	6813.48	32.5683	5.0254	4.83157e-09	4.08279e-07
Ccnb3	209091	ENSMUSG00000051592	10.8483	0	21.6965	NaN	NaN	0.000989355	0.0130217
Ccnyl1	227210	ENSMUSG00000070871	678.576	393.391	963.762	2.44988	1.29271	0.000939579	0.0125492
Ccpg1	72278	ENSMUSG00000034563	964.607	1344.55	584.666	0.434842	-1.20144	0.0023968	0.0250041
Ccr9	12769	ENSMUSG00000029530	48.0899	21.0901	75.0898	3.56043	1.83205	0.0116893	0.0778223
Ccrl2	54199	ENSMUSG00000043953	987.528	156.174	1818.88	11.6465	3.54182	0.00223571	0.0237749
Ccsap	73420	ENSMUSG00000031971	173.068	309.35	36.7855	0.118912	-3.07203	6.34878e-09	5.2622e-07
Ccser1	232035	ENSMUSG00000039578	13.1523	1.33966	24.9649	18.6352	4.21996	0.00943564	0.0669617
Cct2	12461	ENSMUSG00000034024	5174.97	3596.76	6753.18	1.87757	0.908869	0.0146622	0.0892142
Cct3	12462	ENSMUSG00000001416	4878.82	2692.8	7064.84	2.6236	1.39155	0.000248642	0.00458216
Cct4	12464	ENSMUSG00000007739	8990.35	5085.69	12895	2.53555	1.3423	0.000292356	0.00515731
Cd151	12476	ENSMUSG00000025510	733.231	1094.9	371.567	0.339363	-1.5591	6.59013e-05	0.00155957
Cd164	53599	ENSMUSG00000019818	2002.4	1356.95	2647.85	1.95132	0.96445	0.00970058	0.0681164
Cd180	17079	ENSMUSG00000021624	5704.78	8189.95	3219.62	0.393119	-1.34696	0.00104878	0.0136045
Cd274	60533	ENSMUSG00000016496	5613.66	737.407	10489.9	14.2254	3.8304	4.43468e-05	0.0011166
Cd28	12487	ENSMUSG00000026012	1638.93	3062.35	215.52	0.0703775	-3.82874	5.98173e-05	0.00144119
Cd300a	217303	ENSMUSG00000034652	4176.83	6589.37	1764.29	0.267749	-1.90105	0.0001513	0.00310542
Cd300e	217306	ENSMUSG00000048498	344.985	70.7081	619.261	8.75799	3.1306	1.6893e-08	1.24527e-06
Cd300lb	217304	ENSMUSG00000063193	3017.35	4833.51	1201.18	0.24851	-2.00862	1.59846e-07	9.01959e-06
Cd300lf	246746	ENSMUSG00000047798	157.075	262.883	51.2677	0.195021	-2.3583	8.76743e-06	0.000291513
Cd300lh	382551	ENSMUSG00000069607	118.032	208.23	27.8333	0.133666	-2.90329	2.22082e-05	0.000625549
Cd302	66205	ENSMUSG00000060703	1446.52	565.184	2327.86	4.11877	2.04221	2.54666e-07	1.35741e-05
Cd33	12489	ENSMUSG00000004609	1198.92	470.816	1927.03	4.09295	2.03314	0.00156871	0.0182604
Cd37	12493	ENSMUSG00000030798	1556.03	2574.49	537.573	0.208808	-2.25975	0.000799253	0.0110941
Cd38	12494	ENSMUSG00000029084	780.536	36.7497	1524.32	41.4786	5.37429	0.00035785	0.00600459
Cd40	21939	ENSMUSG00000017652	1491.96	83.1929	2900.72	34.8674	5.12381	1.67822e-29	4.84531e-26
Cd44	12505	ENSMUSG00000005087	10335	5180.75	15489.3	2.98978	1.58004	3.02186e-05	0.000812851
Cd55	13136	ENSMUSG00000026399	43.3571	10.4866	76.2276	7.26905	2.86177	0.000507534	0.00784968
Cd84	12523	ENSMUSG00000038147	7315.08	10344.5	4285.68	0.414295	-1.27127	0.000492626	0.0077147
Cd93	17064	ENSMUSG00000027435	7497.99	10766.9	4229.04	0.39278	-1.34821	0.000385803	0.00638468
Cd99l2	171486	ENSMUSG00000035776	266.615	379.715	153.515	0.404289	-1.30654	0.00347934	0.0330155
Cdan1	68968	ENSMUSG00000027284	386.279	554.585	217.972	0.393036	-1.34727	0.00180794	0.020245
Cdc42ep2	104252	ENSMUSG00000045664	268.528	43.2629	493.793	11.4138	3.5127	8.24584e-13	1.5697e-10
Cdc42ep3	260409	ENSMUSG00000036533	260.348	413.507	107.188	0.259216	-1.94777	2.81893e-05	0.000759445
Cdca7l	217946	ENSMUSG00000021175	299.692	534.11	65.2736	0.12221	-3.03257	6.54041e-07	3.06215e-05
Cdh12	215654	ENSMUSG00000040452	7.28435	0	14.5687	NaN	NaN	0.0095423	0.06736
Cdhr2	268663	ENSMUSG00000034918	16.2923	2.64368	29.941	11.3255	3.5015	0.0144971	0.08858
Cdipt	52858	ENSMUSG00000030682	957.213	1269.03	645.393	0.50857	-0.975482	0.0128237	0.0822027
Cdk15	271697	ENSMUSG00000026023	46.5485	80.166	12.9309	0.161301	-2.63217	0.000834112	0.0114405
Cdk18	18557	ENSMUSG00000026437	2683.99	4166.84	1201.13	0.28826	-1.79456	2.81355e-06	0.000109036
Cdk19	78334	ENSMUSG00000038481	827.703	1284.44	370.962	0.288812	-1.7918	6.90818e-06	0.000236971
Cdk2	12566	ENSMUSG00000025358	371.522	514.649	228.396	0.44379	-1.17205	0.00555861	0.046361
Cdk20	105278	ENSMUSG00000021483	267.968	460.396	75.5389	0.164074	-2.60758	3.4426e-08	2.33867e-06
Cdk5rap3	80280	ENSMUSG00000018669	227.547	315.388	139.706	0.442966	-1.17473	0.0119334	0.078833
Cdk8	264064	ENSMUSG00000029635	648.688	374.91	922.466	2.4605	1.29895	0.00140023	0.0168446
Cdkn1a	12575	ENSMUSG00000023067	2303.41	933.659	3673.17	3.93417	1.97606	0.000129206	0.00271961
Cds2	110911	ENSMUSG00000058793	1002.67	1352.04	653.296	0.483193	-1.04933	0.00594104	0.0487295
Cdt1	67177	ENSMUSG00000006585	534.564	917.871	151.258	0.164792	-2.60128	8.95665e-07	4.04052e-05
Ceacam18	72431	ENSMUSG00000030472	10.4542	1.12187	19.7865	17.6371	4.14054	0.0151103	0.0908245
Cebpa	12606	ENSMUSG00000034957	469.057	899.136	38.9791	0.0433517	-4.52777	0.000296026	0.00521144
Cela1	109901	ENSMUSG00000023031	35.6079	60.4275	10.7884	0.178535	-2.48572	0.00421139	0.0377023
Celf2	14007	ENSMUSG00000002107	3567.31	5403.32	1731.31	0.320416	-1.64198	1.72508e-05	0.000509425
Cemip	80982	ENSMUSG00000052353	27.779	3.6451	51.913	14.2419	3.83207	0.000223977	0.00421276
Cenpb	12616	ENSMUSG00000068267	3165.61	4847.89	1483.32	0.305973	-1.70852	4.43718e-06	0.00016285
Cenpo	52504	ENSMUSG00000020652	158.295	225.155	91.436	0.406102	-1.30009	0.0106812	0.0729038
Cep126	234915	ENSMUSG00000040729	9.03119	0.243843	17.8185	73.0739	6.19128	0.00886272	0.064238
Cep131	12009	ENSMUSG00000039781	187.424	291.712	83.1351	0.28499	-1.81102	0.000233581	0.00435646
Cep170b	217882	ENSMUSG00000072825	542.223	737.166	347.28	0.471102	-1.08589	0.00685433	0.0537449
Cep19	66994	ENSMUSG00000035790	129.862	184.472	75.2517	0.40793	-1.29361	0.0112574	0.0757915
Cep350	74081	ENSMUSG00000033671	10997.7	7844.58	14150.8	1.80389	0.851115	0.0172815	0.098874
Cept1	99712	ENSMUSG00000040774	1191.73	828.494	1554.97	1.87686	0.90832	0.0137259	0.0856536
Cercam	99151	ENSMUSG00000039787	80.1699	117.647	42.6929	0.362891	-1.46239	0.0162557	0.0950698
Cerk	223753	ENSMUSG00000035891	3161.88	5217.45	1106.31	0.212041	-2.23759	5.62692e-07	2.70014e-05
Cers6	241447	ENSMUSG00000027035	5837.06	2198.87	9475.24	4.30914	2.1074	1.92077e-08	1.40257e-06
Cfap52	71860	ENSMUSG00000020904	9.58333	0.487685	18.679	38.3013	5.25932	0.0138726	0.0862578
Cfap69	207686	ENSMUSG00000040473	10.5145	0	21.029	NaN	NaN	0.0011792	0.0148024
Cfb	14962	ENSMUSG00000090231	373.631	54.0316	693.23	12.8301	3.68146	6.89814e-09	5.63663e-07
Cflar	12633	ENSMUSG00000026031	12096.9	2632.19	21561.6	8.19149	3.03413	8.37731e-15	2.50207e-12
Cftr	12638	ENSMUSG00000041301	14.3889	2.36713	26.4108	11.1573	3.47991	0.016798	0.096965
Ch25h	12642	ENSMUSG00000050370	190.773	23.604	357.941	15.1644	3.92262	0.00565771	0.0469165
Chaf1b	110749	ENSMUSG00000022945	174.2	261.293	87.1082	0.333374	-1.58479	0.0143358	0.0879525
Chchd10	103172	ENSMUSG00000049422	109.071	164.55	53.5916	0.325686	-1.61845	0.00449366	0.039595
Chek2	50883	ENSMUSG00000029521	327.77	494.878	160.662	0.324649	-1.62305	0.000235211	0.00438124
Chia1	81600	ENSMUSG00000062778	8.87521	0	17.7504	NaN	NaN	0.00327966	0.0315806
Chic2	74277	ENSMUSG00000029229	449.391	254.866	643.916	2.52649	1.33713	0.00160154	0.0185452
Chmp6	208092	ENSMUSG00000025371	284.787	388.764	180.81	0.46509	-1.10442	0.014521	0.0886666
Chordc1	66917	ENSMUSG00000001774	1432.42	867.193	1997.65	2.30358	1.20388	0.0020738	0.0224474
Chrnb3	108043	ENSMUSG00000031492	10.6535	0.809677	20.4974	25.3155	4.66195	0.0137258	0.0856536
Chst12	59031	ENSMUSG00000036599	512.812	749.272	276.352	0.368828	-1.43898	0.000417009	0.00676391
Chst14	72136	ENSMUSG00000074916	194.68	296.914	92.4461	0.311357	-1.68336	0.000680785	0.0098274
Chst3	53374	ENSMUSG00000057337	131.467	192.171	70.7617	0.368221	-1.44135	0.00608827	0.0496083
Cib1	23991	ENSMUSG00000030538	186.909	274.31	99.5075	0.362755	-1.46293	0.00330955	0.0317978
Cipc	217732	ENSMUSG00000034157	1372.84	2091.69	653.98	0.312656	-1.67735	0.0139198	0.086373
Cish	12700	ENSMUSG00000032578	43.6916	4.28223	83.101	19.406	4.27843	0.0013694	0.0165675
Ckb	12709	ENSMUSG00000001270	2988.87	4876.11	1101.63	0.225924	-2.14609	2.06498e-08	1.49049e-06
Clcn5	12728	ENSMUSG00000004317	710.65	436.378	984.923	2.25704	1.17443	0.00439882	0.0388582
Clec2d	93694	ENSMUSG00000030157	3726.84	2155.23	5298.44	2.45841	1.29773	0.000127088	0.00268404
Clec4a1	269799	ENSMUSG00000049037	2782.35	1041.09	4523.61	4.34506	2.11938	7.7088e-09	6.21114e-07
Clic6	209195	ENSMUSG00000022949	9.1392	0.425989	17.8524	41.9082	5.38916	0.00899171	0.0647665
Cln5	211286	ENSMUSG00000022125	3837.39	1609.19	6065.58	3.76933	1.91431	3.04966e-07	1.58647e-05
Cln6	76524	ENSMUSG00000032245	324.35	522.771	125.929	0.240888	-2.05357	5.61425e-06	0.000200115
Cln8	26889	ENSMUSG00000026317	2197.86	3132.83	1262.88	0.403112	-1.31075	0.000412357	0.00670489
Clrn3	212070	ENSMUSG00000050866	11.5023	0.809677	22.195	27.4121	4.77674	0.00921694	0.0659496
Cmas	12764	ENSMUSG00000030282	938.301	1218.46	658.143	0.540144	-0.888584	0.0152883	0.0915448
Cmbl	69574	ENSMUSG00000022235	30.8155	50.7175	10.9135	0.215182	-2.21637	0.0154571	0.0921254
Cmklr1	14747	ENSMUSG00000042190	174.299	54.2841	294.313	5.42172	2.43875	4.32294e-06	0.000159332
Cmtm3	68119	ENSMUSG00000031875	1901.7	2605	1198.41	0.460043	-1.12016	0.00610209	0.0496975
Cmtm7	102545	ENSMUSG00000032436	397.302	624.924	169.679	0.27152	-1.88087	1.98347e-05	0.000569165
Cndp1	338403	ENSMUSG00000056162	8.49767	0.269892	16.7254	61.9708	5.95352	0.0127935	0.0820822
Cnn3	71994	ENSMUSG00000053931	74.0105	26.0815	121.939	4.67532	2.22507	0.0125427	0.0811647
Cnnm2	94219	ENSMUSG00000064105	157.537	257.247	57.8265	0.22479	-2.15335	3.62612e-05	0.000954639
Cnnm3	94218	ENSMUSG00000001138	238.815	389.421	88.2093	0.226514	-2.14233	6.11783e-06	0.000212809
Cnot7	18983	ENSMUSG00000031601	1210.72	771.081	1650.37	2.14033	1.09783	0.00522428	0.044168
Cnp	12799	ENSMUSG00000006782	354.52	493.435	215.604	0.436945	-1.19448	0.00646895	0.0516413
Cnpy3	72029	ENSMUSG00000023973	510.588	841.455	179.72	0.213583	-2.22713	1.3243e-07	7.72417e-06
Cnr2	12802	ENSMUSG00000062585	344.825	562.186	127.464	0.22673	-2.14095	1.20955e-06	5.19926e-05
Cntn6	53870	ENSMUSG00000030092	10.231	0.269892	20.192	74.8151	6.22526	0.0125375	0.0811647
Cntnap2	66797	ENSMUSG00000039419	14.528	1.00142	28.0547	28.0149	4.80812	0.0119787	0.0789047
Cntnap5c	620292	ENSMUSG00000038048	17.7288	0.783628	34.6739	44.248	5.46754	0.00995014	0.0691956
Coa3	52469	ENSMUSG00000017188	186.654	274.303	99.0058	0.360936	-1.47018	0.00210207	0.0226042
Coasy	71743	ENSMUSG00000001755	257.887	382.906	132.868	0.346998	-1.527	0.000609237	0.00905907
Cobl	12808	ENSMUSG00000020173	9.25741	0	18.5148	NaN	NaN	0.00355358	0.0335835
Cobll1	319876	ENSMUSG00000034903	41.2591	5.87259	76.6456	13.0514	3.70613	0.000399856	0.00655317
Col11a1	12814	ENSMUSG00000027966	20.8964	3.06967	38.7231	12.6148	3.65704	0.00985651	0.068793
Col11a2	12815	ENSMUSG00000024330	50.8733	17.6301	84.1166	4.77119	2.25435	0.00266847	0.0271598
Col12a1	12816	ENSMUSG00000032332	38.9231	3.61905	74.2271	20.5101	4.35826	0.00675177	0.0532681
Col16a1	107581	ENSMUSG00000040690	24.2308	3.88894	44.5726	11.4614	3.51871	0.0150371	0.0904788
Col19a1	12823	ENSMUSG00000026141	42.4303	3.3425	81.5181	24.3883	4.60812	0.00379868	0.0349467
Col27a1	373864	ENSMUSG00000045672	88.4356	8.9452	167.926	18.7728	4.23057	7.39362e-10	7.85764e-08
Col28a1	213945	ENSMUSG00000068794	16.1098	1.15752	31.062	26.8351	4.74605	0.00624367	0.050518
Col4a1	12826	ENSMUSG00000031502	107.045	38.3006	175.789	4.58973	2.19841	0.000237087	0.004402
Col4a2	12827	ENSMUSG00000031503	162.586	66.9531	258.22	3.85672	1.94738	0.00265764	0.0270814
Col4a5	12830	ENSMUSG00000031274	165.108	237.357	92.8583	0.391217	-1.35396	0.00856763	0.0627478
Col5a3	53867	ENSMUSG00000004098	26.6109	3.35896	49.8628	14.8447	3.89188	0.00145005	0.0172997
Commd5	66398	ENSMUSG00000055041	118.5	169.095	67.9064	0.401588	-1.31621	0.0154567	0.0921254
Comtd1	69156	ENSMUSG00000021773	241.968	391.311	92.6255	0.236706	-2.07883	9.18668e-06	0.000303126
Cops2	12848	ENSMUSG00000027206	4954.67	2993.95	6915.4	2.30979	1.20776	0.0012687	0.0156425
Coq10a	210582	ENSMUSG00000039914	155.581	243.542	67.6191	0.277649	-1.84867	0.000330011	0.00568243
Coq10b	67876	ENSMUSG00000025981	840.087	380.301	1299.87	3.41801	1.77316	1.08125e-05	0.000346862
Coro1a	12721	ENSMUSG00000030707	1112.76	1630.18	595.347	0.365204	-1.45322	0.000186242	0.0036455
Coro2a	107684	ENSMUSG00000028337	1832.12	2642.02	1022.23	0.38691	-1.36993	0.000627368	0.00921789
Coro7	78885	ENSMUSG00000039637	1078.87	1583.73	574.011	0.362442	-1.46418	0.000184088	0.00361559
Cotl1	72042	ENSMUSG00000031827	3726.34	5930.63	1522.06	0.256644	-1.96216	2.03987e-07	1.11122e-05
Cox14	66379	ENSMUSG00000023020	178.095	276.043	80.1473	0.290344	-1.78417	0.000331308	0.00568243
Cp	12870	ENSMUSG00000003617	1884.89	30.3344	3739.45	123.274	6.94573	9.40471e-05	0.00208069
Cpd	12874	ENSMUSG00000020841	22918.4	8591.12	37245.7	4.33538	2.11616	5.13541e-08	3.40845e-06
Cped1	214642	ENSMUSG00000062980	107.806	173.66	41.9519	0.241574	-2.04946	0.00271356	0.0275332
Cpne6	12891	ENSMUSG00000022212	7.67857	0	15.3571	NaN	NaN	0.00739751	0.0564925
Cpt1a	12894	ENSMUSG00000024900	3734.34	5225.95	2242.74	0.429154	-1.22043	0.0123909	0.0805737
Cracr2b	213573	ENSMUSG00000048200	155.735	229.774	81.6951	0.355545	-1.49189	0.00296621	0.0293453
Crat	12908	ENSMUSG00000026853	1639.75	2215.22	1064.28	0.480439	-1.05757	0.00562603	0.0467426
Creb3l2	208647	ENSMUSG00000038648	377.289	524.896	229.682	0.437576	-1.19239	0.00437503	0.0386677
Crebrf	77128	ENSMUSG00000048249	947.141	1469.26	425.023	0.289277	-1.78947	0.00166795	0.0191224
Crk	12928	ENSMUSG00000017776	3129.71	2077.99	4181.43	2.01225	1.00881	0.008255	0.0610856
Crlf2	57914	ENSMUSG00000033467	487.552	662.233	312.872	0.47245	-1.08177	0.0101915	0.0703938
Crot	74114	ENSMUSG00000003623	359.398	566.211	152.584	0.269483	-1.89173	1.46035e-05	0.000443819
Crxos	546024	ENSMUSG00000074365	11.3481	0.487685	22.2085	45.5386	5.50902	0.0137316	0.0856582
Csf2	12981	ENSMUSG00000018916	24.6863	0	49.3727	NaN	NaN	0.00206686	0.0224057
Csf2rb	12983	ENSMUSG00000071713	8774.01	5990.16	11557.9	1.92948	0.948208	0.00612904	0.0498059
Csf3	12985	ENSMUSG00000038067	108.829	1.12187	216.536	193.014	7.59256	0.00212996	0.0228608
Csf3r	12986	ENSMUSG00000028859	1885.73	921.675	2849.79	3.09196	1.62852	0.00158104	0.0183691
Csk	12988	ENSMUSG00000032312	1142.56	1614.39	670.726	0.415466	-1.2672	0.0009521	0.0126742
Csmd3	239420	ENSMUSG00000022311	30.1614	2.97527	57.3475	19.2747	4.26864	0.0130118	0.0828994
Csnk1a1	93687	ENSMUSG00000024576	4322.55	2861.29	5783.81	2.0214	1.01536	0.00633232	0.0511159
Csnk1e	27373	ENSMUSG00000022433	497.02	721.849	272.191	0.377075	-1.40708	0.0043061	0.0381948
Csnk1g2	103236	ENSMUSG00000003345	908.749	1277.42	540.075	0.422785	-1.242	0.00130093	0.0159604
Csnk1g3	70425	ENSMUSG00000073563	1865.41	1044.03	2686.79	2.57349	1.36373	0.000336704	0.00573419
Csrp1	13007	ENSMUSG00000026421	624.994	928.355	321.632	0.346454	-1.52927	0.000285897	0.00508481
Csrp2bp	228714	ENSMUSG00000027425	710.204	956.323	464.084	0.485279	-1.04311	0.00810451	0.0603575
Cstf2	108062	ENSMUSG00000031256	1637.84	900.143	2375.54	2.63907	1.40003	0.000256707	0.004699
Ctc1	68964	ENSMUSG00000020898	185.515	283.225	87.8043	0.310016	-1.68959	0.000480091	0.00756744
Ctdsp1	227292	ENSMUSG00000026176	1006.77	1426.37	587.164	0.411649	-1.28051	0.00107668	0.0138362
Ctdsp2	52468	ENSMUSG00000078429	919.456	1530.11	308.806	0.20182	-2.30886	1.28291e-07	7.50806e-06
Ctdspl2	329506	ENSMUSG00000033411	1973.97	1342.66	2605.27	1.94037	0.956333	0.0128265	0.0822027
Ctla2a	13024	ENSMUSG00000044258	1686.76	862.073	2511.44	2.91326	1.54263	0.001741	0.0197378
Ctnnbip1	67087	ENSMUSG00000028988	343.537	497.805	189.269	0.380208	-1.39514	0.00119859	0.0149483
Ctsa	19025	ENSMUSG00000017760	12044.2	15795.1	8293.35	0.525059	-0.929448	0.0133307	0.0840348
Ctsb	13030	ENSMUSG00000021939	99069.4	144379	53759.8	0.372352	-1.42526	0.000108133	0.00234441
Ctsc	13032	ENSMUSG00000030560	9121.52	2316.71	15926.3	6.87454	2.78126	2.34612e-10	2.80289e-08
Ctsd	13033	ENSMUSG00000007891	57552.2	89267.1	25837.4	0.289439	-1.78867	0.00422194	0.0377707
Ctsf	56464	ENSMUSG00000083282	106.656	155.456	57.8549	0.372163	-1.426	0.0119738	0.0789047
Ctsl	13039	ENSMUSG00000021477	22376.1	29041.6	15710.6	0.540967	-0.886387	0.0092118	0.0659405
Cuedc1	103841	ENSMUSG00000018378	228.457	328.905	128.008	0.389195	-1.36143	0.00358299	0.0337025
Cuedc2	67116	ENSMUSG00000036748	1091.08	1620.75	561.411	0.34639	-1.52953	6.55665e-05	0.0015557
Cul1	26965	ENSMUSG00000029686	4653.34	3148.71	6157.96	1.95571	0.967693	0.00824282	0.0610216
Cul7	66515	ENSMUSG00000038545	275.923	416.088	135.758	0.326272	-1.61585	0.000337637	0.0057342
Cul9	78309	ENSMUSG00000040327	462.021	672.477	251.565	0.374088	-1.41855	0.000801321	0.0111044
Cwc15	66070	ENSMUSG00000004096	4355.83	2759.1	5952.56	2.15743	1.10932	0.00284456	0.0284834
Cxcl1	14825	ENSMUSG00000029380	1648.18	15.2013	3281.16	215.848	7.75387	3.09788e-08	2.12113e-06
Cxcl9	17329	ENSMUSG00000029417	80.8424	15.7409	145.944	9.27167	3.21283	1.11557e-06	4.86775e-05
Cxcr3	12766	ENSMUSG00000050232	31.0532	51.5602	10.5461	0.20454	-2.28955	0.0150354	0.0904788
Cxcr4	12767	ENSMUSG00000045382	2377.01	4620.69	133.323	0.0288535	-5.11511	4.11952e-05	0.00105484
Cyb5r1	72017	ENSMUSG00000026456	597.339	822.711	371.966	0.452123	-1.14521	0.00449637	0.0395987
Cyba	13057	ENSMUSG00000006519	2666.09	3664.29	1667.9	0.455177	-1.1355	0.00237022	0.0248354
Cybb	13058	ENSMUSG00000015340	32493.1	14019.3	50967	3.63549	1.86215	6.58914e-06	0.000227378
Cyc1	66445	ENSMUSG00000022551	183.058	265.491	100.625	0.379016	-1.39967	0.00362477	0.0339232
Cyfip1	20430	ENSMUSG00000030447	16871	8982.65	24759.3	2.75635	1.46276	8.09903e-05	0.00183638
Cyp1b1	13078	ENSMUSG00000024087	30.8333	2.97527	58.6914	19.7264	4.30206	0.00865414	0.0631224
Cyp27a1	104086	ENSMUSG00000026170	211.58	385.39	37.7703	0.0980055	-3.35099	0.00642865	0.0515095
Cyp2j8	665095	ENSMUSG00000082932	8.82922	0	17.6584	NaN	NaN	0.00482667	0.0417436
Cyp4f13	170716	ENSMUSG00000024055	135.724	191.478	79.9696	0.417643	-1.25966	0.0168439	0.0971649
Cysltr1	58861	ENSMUSG00000052821	1008.24	471.841	1544.64	3.27364	1.7109	3.91264e-05	0.00101011
Cytip	227929	ENSMUSG00000026832	376.881	599.443	154.32	0.257438	-1.9577	0.000394327	0.0064692
D2hgdh	98314	ENSMUSG00000073609	207.784	324.812	90.7571	0.279414	-1.83952	0.000164401	0.00330385
D330045A20Rik	102871	ENSMUSG00000042498	122.148	60.3692	183.926	3.04669	1.60724	0.00489326	0.0422141
D430041D05Rik	241589	ENSMUSG00000068373	32.3185	10.412	54.225	5.20795	2.38072	0.0071305	0.0552206
D8Ertd738e	101966	ENSMUSG00000019362	819.161	1157.68	480.637	0.415171	-1.26822	0.00111144	0.0141778
D8Ertd82e	244418	ENSMUSG00000050271	587.476	338.08	836.872	2.47537	1.30764	0.00613611	0.0498339
D930015E06Rik	229473	ENSMUSG00000033767	713.573	1061.4	365.749	0.344592	-1.53704	0.000182108	0.00358078
Daam1	208846	ENSMUSG00000034574	1481.38	755.086	2207.67	2.92373	1.54781	5.6257e-05	0.00137841
Daam2	76441	ENSMUSG00000040260	79.0401	30.4611	127.619	4.18958	2.0668	0.0166387	0.0965276
Dag1	13138	ENSMUSG00000039952	1684	2201.26	1166.74	0.530032	-0.915849	0.0146692	0.0892259
Dagla	269060	ENSMUSG00000035735	212.778	311.536	114.021	0.365996	-1.4501	0.00214873	0.0229768
Daglb	231871	ENSMUSG00000039206	1500.35	2670.49	330.211	0.123652	-3.01564	1.43687e-13	3.27511e-11
Dalrd3	67789	ENSMUSG00000019039	180.292	265.784	94.7998	0.35668	-1.4873	0.00358367	0.0337025
Dapk1	69635	ENSMUSG00000021559	1881.88	2766.06	997.705	0.360695	-1.47115	0.00164259	0.0189193
Dars2	226539	ENSMUSG00000026709	257.137	349.714	164.561	0.470558	-1.08756	0.012421	0.0807088
Dbp	13170	ENSMUSG00000059824	87.7058	143.541	31.8707	0.222032	-2.17116	0.0116467	0.07759
Dbt	13171	ENSMUSG00000000340	529.06	300.886	757.235	2.51669	1.33153	0.00119363	0.0149294
Dcaf11	28199	ENSMUSG00000022214	682.454	968.515	396.394	0.40928	-1.28884	0.00101075	0.0132398
Dcaf15	212123	ENSMUSG00000037103	136.701	209.177	64.2246	0.307034	-1.70353	0.00115663	0.0145613
Dcaf7	71833	ENSMUSG00000049354	1555.57	2213.19	897.955	0.405728	-1.30141	0.000544341	0.00825711
Dcakd	68087	ENSMUSG00000020935	292.894	395.372	190.416	0.481613	-1.05405	0.0125208	0.0811647
Dcbld2	73379	ENSMUSG00000035107	1194.76	258.638	2130.87	8.23882	3.04244	8.51918e-14	2.04969e-11
Dclk1	13175	ENSMUSG00000027797	25.9267	5.23526	46.6181	8.90465	3.15456	0.00721688	0.0557007
Dctpp1	66422	ENSMUSG00000042462	89.2618	135.394	43.1291	0.318545	-1.65043	0.00544228	0.0456863
Dcun1d3	233805	ENSMUSG00000048787	481.022	283.209	678.835	2.39694	1.2612	0.00223831	0.0237879
Dcun1d5	76863	ENSMUSG00000032002	1206.97	688.029	1725.92	2.5085	1.32682	0.000718167	0.0102478
Ddah2	51793	ENSMUSG00000007039	70.6384	114.483	26.7937	0.234041	-2.09517	0.000906665	0.0121848
Ddb1	13194	ENSMUSG00000024740	3920.1	5229.6	2610.6	0.499197	-1.00232	0.00542739	0.0455962
Ddhd1	114874	ENSMUSG00000037697	711.387	442.404	980.37	2.21601	1.14796	0.0024666	0.0255098
Ddi2	68817	ENSMUSG00000078515	1229.28	1624.31	834.244	0.513598	-0.961288	0.00971026	0.0681567
Ddr1	12305	ENSMUSG00000003534	16.8815	2.00949	31.7535	15.8018	3.98201	0.00826858	0.0611504
Ddx1	104721	ENSMUSG00000037149	3121.47	2149.01	4093.94	1.90503	0.929817	0.0153541	0.0918431
Ddx21	56200	ENSMUSG00000020075	5181.35	3231.16	7131.53	2.20711	1.14216	0.0149305	0.0902513
Ddx25	30959	ENSMUSG00000032101	8.03152	0	16.063	NaN	NaN	0.0058329	0.0480015
Ddx5	13207	ENSMUSG00000020719	31857.5	22214.2	41500.8	1.86821	0.901657	0.0107577	0.0732531
Ddx60	234311	ENSMUSG00000037921	557.51	343.757	771.263	2.24363	1.16583	0.00235523	0.0247721
Deaf1	54006	ENSMUSG00000058886	209.462	347.639	71.2852	0.205055	-2.28591	2.22922e-06	8.81661e-05
Decr1	67460	ENSMUSG00000028223	126.108	178.631	73.5845	0.411937	-1.27951	0.0164018	0.0956663
Dedd2	67379	ENSMUSG00000054499	63.9755	97.5989	30.3521	0.310988	-1.68507	0.0115757	0.0772888
Def8	23854	ENSMUSG00000001482	343.669	472.822	214.516	0.453694	-1.14021	0.00727447	0.0559821
Dennd3	105841	ENSMUSG00000036661	27.2484	7.07535	47.4214	6.70234	2.74467	0.00730297	0.0561266
Dennd4c	329877	ENSMUSG00000038024	6858.93	10573.2	3144.65	0.297417	-1.74944	3.16456e-06	0.000120724
Denr	68184	ENSMUSG00000023106	5477.62	1433.33	9521.92	6.6432	2.73188	3.26963e-12	5.49901e-10
Depdc7	211896	ENSMUSG00000027173	143.89	208.637	79.1432	0.379334	-1.39846	0.00836389	0.0616281
Deptor	97998	ENSMUSG00000022419	146.023	220.144	71.9017	0.326612	-1.61435	0.00298226	0.0294169
Dfna5	54722	ENSMUSG00000029821	86.3757	125.923	46.828	0.371877	-1.4271	0.0159482	0.0940013
Dgcr6	13353	ENSMUSG00000003531	191.232	271.543	110.921	0.408483	-1.29165	0.00679634	0.0534664
Dgkd	227333	ENSMUSG00000070738	2322.1	3161.61	1482.59	0.468934	-1.09254	0.00373842	0.0345191
Dgkh	380921	ENSMUSG00000034731	985.511	383.045	1587.98	4.14567	2.05161	1.01726e-05	0.000329382
Dgkz	104418	ENSMUSG00000040479	3592.32	5302.02	1882.61	0.355075	-1.49381	3.77358e-05	0.000983636
Dguok	27369	ENSMUSG00000014554	306.536	431.237	181.835	0.42166	-1.24585	0.00629195	0.0508612
Dhcr7	13360	ENSMUSG00000058454	172.41	290.93	53.8898	0.185233	-2.43259	2.13536e-06	8.52323e-05
Dhodh	56749	ENSMUSG00000031730	62.0987	94.0232	30.1742	0.320923	-1.6397	0.0168986	0.0973508
Dhrs3	20148	ENSMUSG00000066026	3755.33	6298.7	1211.96	0.192414	-2.37772	0.000158857	0.00321482
Dhrs7	66375	ENSMUSG00000021094	398.663	571.793	225.532	0.39443	-1.34216	0.00176895	0.0199538
Dhrs7b	216820	ENSMUSG00000042569	170.28	252.969	87.59	0.346247	-1.53013	0.00251264	0.0258554
Dhrs9	241452	ENSMUSG00000027068	565.748	858.914	272.582	0.317357	-1.65582	0.000215876	0.00409149
Dhx15	13204	ENSMUSG00000029169	3758.85	2463.54	5054.16	2.05159	1.03674	0.0053081	0.0447892
Dhx16	69192	ENSMUSG00000024422	701.32	952.003	450.638	0.473357	-1.079	0.00556524	0.046394
Dhx32	101437	ENSMUSG00000030986	393.634	558.823	228.445	0.408797	-1.29055	0.00219977	0.0234502
Dhx34	71723	ENSMUSG00000006019	240.608	386.28	94.9364	0.245771	-2.02461	1.85479e-05	0.00054183
Dhx40	67487	ENSMUSG00000018425	1097.25	626.874	1567.62	2.50069	1.32232	0.00792273	0.0593365
Diaph2	54004	ENSMUSG00000034480	4944.74	2451.41	7438.08	3.0342	1.60132	2.78877e-05	0.000754841
Dld	13382	ENSMUSG00000020664	2044.33	1347.46	2741.19	2.03434	1.02456	0.00716347	0.0553986
Dlx3	13393	ENSMUSG00000001510	10.9553	0.243843	21.6668	88.8555	6.47339	0.0121449	0.0795481
Dmtf1	23857	ENSMUSG00000042508	1189.02	732.928	1645.11	2.24456	1.16644	0.00257856	0.0263686
Dmxl2	235380	ENSMUSG00000041268	2294.32	1261.05	3327.59	2.63874	1.39985	0.00358871	0.0337133
Dna2	327762	ENSMUSG00000036875	185.536	295.815	75.2565	0.254404	-1.97481	0.000114029	0.00245078
Dnah5	110082	ENSMUSG00000022262	40.1326	4.01233	76.2528	19.0046	4.24828	0.0172444	0.0987518
Dnajb6	23950	ENSMUSG00000029131	4033.15	2432.95	5633.35	2.31544	1.21129	0.00105103	0.0136178
Dnajc1	13418	ENSMUSG00000026740	2396.42	1274.82	3518.01	2.7596	1.46446	0.00028548	0.00508282
Dnajc2	22791	ENSMUSG00000029014	3104.02	1739.81	4468.23	2.56823	1.36077	0.000507966	0.00784968
Dnajc21	78244	ENSMUSG00000044224	1290.08	608.809	1971.36	3.23806	1.69513	2.27602e-05	0.000639018
Dnase2a	13423	ENSMUSG00000003812	1156.08	1861.19	450.979	0.242307	-2.04509	1.83017e-07	1.00648e-05
Dnm1l	74006	ENSMUSG00000022789	2215.31	1544.72	2885.9	1.86824	0.901676	0.0167574	0.0969367
Dnmbp	71972	ENSMUSG00000025195	458.316	631.998	284.634	0.450372	-1.15081	0.00668729	0.0529668
Dnmt1	13433	ENSMUSG00000004099	2653.79	4118.56	1189.01	0.288696	-1.79238	0.00765855	0.0578408
Dnmt3a	13435	ENSMUSG00000020661	2291.35	3338.67	1244.04	0.372617	-1.42423	0.000232179	0.00434758
Dnmt3l	54427	ENSMUSG00000000730	37.9506	2.19164	73.7095	33.6321	5.07177	0.000232268	0.00434758
Dnpep	13437	ENSMUSG00000026209	359.242	492.856	225.628	0.457798	-1.12722	0.00910033	0.0653626
Dnttip2	99480	ENSMUSG00000039756	3034.99	1861.44	4208.54	2.26091	1.1769	0.00190349	0.0210832
Dock10	210293	ENSMUSG00000038608	10120.3	5973.92	14266.6	2.38815	1.25589	0.0140967	0.0869808
Dock8	76088	ENSMUSG00000052085	3968.48	6364.78	1572.18	0.247013	-2.01734	1.41783e-06	5.97594e-05
Dok1	13448	ENSMUSG00000068335	278.301	436.587	120.016	0.274895	-1.86305	4.04341e-05	0.00103923
Dok3	27261	ENSMUSG00000035711	337.522	493.689	181.354	0.367344	-1.4448	0.000831375	0.011412
Dolpp1	57170	ENSMUSG00000026856	108.024	158.223	57.8255	0.365468	-1.45218	0.010151	0.0702393
Dot1l	208266	ENSMUSG00000061589	2102.29	2884.89	1319.68	0.457447	-1.12832	0.00288909	0.0288127
Dpm2	13481	ENSMUSG00000026810	367.862	525.231	210.493	0.400762	-1.31918	0.0021484	0.0229768
Dpm3	68563	ENSMUSG00000042737	229.308	318.348	140.267	0.44061	-1.18243	0.0125325	0.0811647
Dpp3	75221	ENSMUSG00000063904	642.74	923.654	361.826	0.391733	-1.35206	0.000618066	0.00914587
Dpp7	83768	ENSMUSG00000026958	1390.34	1826.97	953.711	0.522017	-0.937832	0.0170201	0.0978554
Dpysl4	26757	ENSMUSG00000025478	11.7114	1.21921	22.2037	18.2115	4.18678	0.0170391	0.0978786
Dram1	71712	ENSMUSG00000020057	3220.93	981.479	5460.37	5.56342	2.47597	2.04859e-10	2.51686e-08
Drap1	66556	ENSMUSG00000024914	391.188	574.306	208.069	0.362297	-1.46476	0.00062589	0.00920399
Draxin	70433	ENSMUSG00000029005	45.864	5.0496	86.6783	17.1654	4.10143	0.00669002	0.0529668
Drc1	381738	ENSMUSG00000073102	11.1093	0.425989	21.7926	51.1577	5.67688	0.0083054	0.0613275
Dscaml1	114873	ENSMUSG00000032087	17.3577	1.7917	32.9238	18.3757	4.19973	0.00374871	0.0345788
Dsel	319901	ENSMUSG00000038702	424.666	260.132	589.201	2.26501	1.17952	0.00696353	0.0543375
Dtd1	66044	ENSMUSG00000027430	137.898	201.153	74.642	0.37107	-1.43024	0.00922068	0.0659496
Dtnbp1	94245	ENSMUSG00000057531	1360.49	1850.25	870.726	0.470598	-1.08743	0.00470273	0.0410819
Dtx3	80904	ENSMUSG00000040415	175.733	261.178	90.2876	0.345694	-1.53243	0.00299313	0.0294479
Duox1	99439	ENSMUSG00000033268	19.9175	2.97527	36.8597	12.3887	3.63095	0.0135983	0.0851027
Duox2	214593	ENSMUSG00000068452	21.1671	1.76565	40.5686	22.9766	4.52209	0.00694716	0.0542342
Dus3l	224907	ENSMUSG00000007603	252.683	358.604	146.761	0.409257	-1.28892	0.00621031	0.0503186
Dusp1	19252	ENSMUSG00000024190	2126.86	703.808	3549.92	5.04388	2.33453	0.00277381	0.0279628
Dusp16	70686	ENSMUSG00000030203	1230.32	155.436	2305.2	14.8305	3.8905	1.72285e-19	1.1938e-16
Dusp2	13537	ENSMUSG00000027368	126.3	21.4313	231.169	10.7865	3.43116	4.72059e-09	4.04826e-07
Dusp3	72349	ENSMUSG00000003518	1850	2955.96	744.053	0.251713	-1.99015	2.43077e-07	1.29964e-05
Dusp7	235584	ENSMUSG00000053716	917.568	1241.58	593.558	0.478067	-1.06471	0.00358219	0.0337025
Dvl2	13543	ENSMUSG00000020888	300.861	477.629	124.093	0.259811	-1.94446	1.79573e-05	0.000527245
Dym	69190	ENSMUSG00000035765	722.723	995.229	450.216	0.452375	-1.14441	0.0062295	0.0504269
Dynll2	68097	ENSMUSG00000020483	714.686	1034.36	395.017	0.381897	-1.38875	0.000429568	0.00690939
Dyrk1b	13549	ENSMUSG00000002409	69.0473	110.972	27.1229	0.244413	-2.0326	0.00957512	0.0674411
E2f1	13555	ENSMUSG00000027490	354.425	485.409	223.44	0.460314	-1.11931	0.00674031	0.0532189
E2f2	242705	ENSMUSG00000018983	115.356	203.876	26.8374	0.131636	-2.92537	0.000512302	0.00787953
Ebi3	50498	ENSMUSG00000003206	515.461	325.543	705.379	2.16678	1.11555	0.00759175	0.0575041
Ebp	13595	ENSMUSG00000031168	173.479	254.964	91.9936	0.360811	-1.47069	0.00363716	0.0339747
Ech1	51798	ENSMUSG00000053898	416.649	608.275	225.023	0.369936	-1.43465	0.000810218	0.0112014
Ecm1	13601	ENSMUSG00000028108	744.959	1131.04	358.875	0.317296	-1.6561	4.14088e-05	0.00105644
Edem1	192193	ENSMUSG00000030104	6805.82	9118.79	4492.84	0.492701	-1.02122	0.00593444	0.0486984
Edn1	13614	ENSMUSG00000021367	333.795	4.79302	662.797	138.284	7.11149	3.2306e-09	2.91477e-07
Eea1	216238	ENSMUSG00000036499	10139.8	5069.17	15210.4	3.00057	1.58524	2.39481e-05	0.000667836
Eef1e1	66143	ENSMUSG00000001707	693.671	344.736	1042.61	3.02436	1.59663	0.000107307	0.00232942
Eepd1	67484	ENSMUSG00000036611	338.123	476.413	199.833	0.419453	-1.25342	0.0147151	0.0893794
Efr3b	668212	ENSMUSG00000020658	377.716	620.15	135.282	0.218144	-2.19665	3.03231e-06	0.000116214
Egfr	13649	ENSMUSG00000020122	86.7389	24.5828	148.895	6.05687	2.59857	0.000520457	0.00797864
Egln1	112405	ENSMUSG00000031987	2269.89	1498.9	3040.88	2.02874	1.02059	0.0125029	0.0811193
Egr1	13653	ENSMUSG00000038418	155.411	222.717	88.1039	0.395587	-1.33793	0.0167657	0.0969367
Ehd1	13660	ENSMUSG00000024772	6283.35	1762.84	10803.9	6.12868	2.61558	2.76896e-09	2.51135e-07
Eif1a	13664	ENSMUSG00000057561	4179.27	2092.93	6265.6	2.9937	1.58193	2.68354e-05	0.000733233
Eif1ax	66235	ENSMUSG00000067194	1174.99	802.406	1547.58	1.92868	0.947614	0.0160177	0.094091
Eif2ak2	19106	ENSMUSG00000024079	4534.05	2485.88	6582.22	2.64784	1.40482	0.0172321	0.098714
Eif2s1	13665	ENSMUSG00000021116	3719.73	2514.07	4925.38	1.95913	0.970213	0.0143856	0.0881192
Eif2s2	67204	ENSMUSG00000074656	4658.94	2544.97	6772.91	2.66129	1.41212	0.000169192	0.00338053
Eif3c	56347	ENSMUSG00000030738	13363	8595.14	18130.9	2.10943	1.07685	0.00402475	0.036294
Eif4e	13684	ENSMUSG00000028156	3468.42	2066.84	4870	2.35625	1.2365	0.00598302	0.0490041
Eif4ebp2	13688	ENSMUSG00000020091	272.985	428.419	117.55	0.274381	-1.86575	0.00012219	0.00259399
Eif4ebp3	108112	ENSMUSG00000090264	126.177	185.061	67.2923	0.363622	-1.45949	0.00797062	0.0596436
Eif4g2	13690	ENSMUSG00000005610	25244.6	15777.2	34712	2.20014	1.13759	0.00248794	0.0256998
Eif5	102641436217869	ENSMUSG00000021282	5760.83	3786.55	7735.11	2.04279	1.03054	0.00531517	0.044827
Eif6	16418	ENSMUSG00000027613	1324.47	812.125	1836.81	2.26173	1.17743	0.0137188	0.0856536
Elf5	13711	ENSMUSG00000027186	9.5533	0.243843	18.8628	77.3563	6.27345	0.00679557	0.0534664
Ell2	192657	ENSMUSG00000001542	10439	4984.03	15893.9	3.18897	1.67309	0.000278872	0.00498031
Elmo2	140579	ENSMUSG00000017670	944.214	1288.15	600.276	0.465998	-1.1016	0.00378075	0.0348372
Eln	13717	ENSMUSG00000029675	14.0878	0.913674	27.2619	29.8377	4.89907	0.0115443	0.0772129
Emc10	69683	ENSMUSG00000008140	417.103	674.175	160.031	0.237373	-2.07477	1.14622e-06	4.93929e-05
Emc8	18117	ENSMUSG00000031819	391.4	551.218	231.581	0.420126	-1.25111	0.00386967	0.0354117
Emilin1	100952	ENSMUSG00000029163	649.32	873.506	425.134	0.486699	-1.0389	0.00737048	0.0564701
Eml3	225898	ENSMUSG00000071647	448.493	679.12	217.865	0.320805	-1.64023	8.58309e-05	0.00192348
Eml4	78798	ENSMUSG00000032624	1567.62	1031.66	2103.57	2.03901	1.02787	0.0060583	0.0494436
Emp3	13732	ENSMUSG00000040212	2714.51	4283.16	1145.86	0.267527	-1.90224	8.27892e-07	3.76419e-05
Enc1	13803	ENSMUSG00000041773	590.786	1072.74	108.833	0.101453	-3.30111	5.23345e-07	2.57554e-05
Engase	217364	ENSMUSG00000033857	210.835	398.716	22.9536	0.0575689	-4.11857	0.000154275	0.0031458
Eno1	13806	ENSMUSG00000063524	553.445	993.395	113.496	0.114251	-3.12972	1.89442e-13	4.15104e-11
Eno1b	13806	ENSMUSG00000063524	553.445	993.395	113.496	0.114251	-3.12972	1.89442e-13	4.15104e-11
Enox1	239188	ENSMUSG00000022012	12.3773	0.243843	24.5107	100.519	6.65132	0.00239894	0.0250041
Enpp1	18605	ENSMUSG00000037370	226.031	310.155	141.907	0.457536	-1.12804	0.0131328	0.0833329
Enpp4	224794	ENSMUSG00000023961	66.8522	24.322	109.382	4.49727	2.16905	0.0102586	0.0707446
Entpd1	12495	ENSMUSG00000048120	1847.37	2651.63	1043.11	0.393386	-1.34598	0.00399887	0.0361925
Entpd6	12497	ENSMUSG00000033068	102.702	151.469	53.935	0.356079	-1.48973	0.00937799	0.0666892
Epb41	269587	ENSMUSG00000028906	2580.29	3523.41	1637.18	0.464657	-1.10576	0.00255912	0.0262162
Epb41l1	13821	ENSMUSG00000027624	1824.9	2845.79	804.006	0.282525	-1.82355	2.95012e-06	0.000113315
Epb41l4b	54357	ENSMUSG00000028434	19.2085	1.12187	37.295	33.2436	5.05501	0.00640712	0.0514798
Epha4	13838	ENSMUSG00000026235	99.0915	5.16691	193.016	37.3562	5.22328	0.000379299	0.00631181
Epha7	13841	ENSMUSG00000028289	27.102	8.62986	45.5741	5.28098	2.40081	0.0117902	0.0782688
Epn1	13854	ENSMUSG00000035203	1096.17	1669.34	522.997	0.313297	-1.6744	1.8405e-05	0.000538564
Epn3	71889	ENSMUSG00000010080	11.1778	0.243843	22.1117	90.6802	6.50272	0.00330093	0.0317678
Erap1	80898	ENSMUSG00000021583	4096.1	2653.48	5538.71	2.08734	1.06166	0.00348204	0.0330155
Erbb4	13869	ENSMUSG00000062209	13.848	0.269892	27.4261	101.619	6.66702	0.00396958	0.0360404
Erf	13875	ENSMUSG00000040857	86.4171	126.297	46.5376	0.368479	-1.44035	0.0160813	0.0943224
Ergic3	66366	ENSMUSG00000005881	1152.29	1593.32	711.25	0.446394	-1.16361	0.00216968	0.0231722
Eri3	140546	ENSMUSG00000033423	289.752	438.741	140.763	0.320835	-1.6401	0.000276737	0.00494729
Erich2	66748	ENSMUSG00000075302	14.4776	1.34946	27.6056	20.4568	4.35451	0.00644907	0.0515908
Erp29	67397	ENSMUSG00000029616	1163.37	1921.78	404.968	0.210726	-2.24656	1.20667e-08	9.16807e-07
Esf1	66580	ENSMUSG00000045624	1925.61	1133.89	2717.33	2.39646	1.26091	0.00203047	0.0221498
Esrrb	26380	ENSMUSG00000021255	14.5813	2.25334	26.9092	11.9419	3.57796	0.0118162	0.0783925
Esyt1	23943	ENSMUSG00000025366	5291.04	7610	2972.09	0.39055	-1.35642	0.000616104	0.00913764
Ethe1	66071	ENSMUSG00000064254	266.948	391.289	142.607	0.364455	-1.45619	0.0014902	0.0176034
Etv6	14011	ENSMUSG00000030199	1031.29	706.516	1356.06	1.91937	0.940633	0.0167804	0.0969367
Eva1b	230752	ENSMUSG00000050212	134.553	65.4837	203.622	3.10951	1.63669	0.00205581	0.0223278
Exoc3l4	74190	ENSMUSG00000021280	52.0889	21.6164	82.5615	3.81939	1.93334	0.00879454	0.0639311
Exosc5	27998	ENSMUSG00000061286	96.0861	142.085	50.0875	0.352518	-1.50423	0.0131629	0.0834369
Ext1	14042	ENSMUSG00000061731	1255.89	334.592	2177.19	6.507	2.70199	9.56403e-06	0.000313576
Ext2	14043	ENSMUSG00000027198	821.525	1089.86	553.186	0.507573	-0.978312	0.0145389	0.0887447
Extl3	54616	ENSMUSG00000021978	1046.63	1409.73	683.522	0.484859	-1.04436	0.00681683	0.0535546
Eya4	14051	ENSMUSG00000010461	194.772	317.116	72.4281	0.228396	-2.13039	2.21399e-05	0.000625513
Ezr	22350	ENSMUSG00000052397	3458.51	1206.12	5710.89	4.73492	2.24334	5.25346e-06	0.000189201
F10	14058	ENSMUSG00000031444	720.117	57.026	1383.21	24.2557	4.60025	0.000510067	0.00786619
F11r	16456	ENSMUSG00000038235	356.436	141.064	571.809	4.05355	2.01919	1.3844e-05	0.000424461
F2r	14062	ENSMUSG00000048376	17.4322	2.47133	32.3931	13.1076	3.71233	0.00401497	0.0362435
F3	14066	ENSMUSG00000028128	77.8193	3.82059	151.818	39.7368	5.3124	4.33921e-10	4.81847e-08
F830016B08Rik	240328	ENSMUSG00000090942	378.088	112.317	643.859	5.73249	2.51916	0.0166852	0.0967005
Faap100	71885	ENSMUSG00000025384	205.366	311.872	98.8599	0.316989	-1.6575	0.000563539	0.00849624
Fadd	14082	ENSMUSG00000031077	188.862	274.783	102.941	0.374627	-1.41647	0.00835116	0.0615867
Fads1	76267	ENSMUSG00000010663	1095.02	1831.15	358.878	0.195985	-2.35119	4.13642e-09	3.61895e-07
Fam102a	98952	ENSMUSG00000039157	329.039	573.985	84.0927	0.146507	-2.77096	1.67331e-05	0.000498913
Fam102b	329739	ENSMUSG00000040339	5240.82	1759.06	8722.58	4.95867	2.30995	5.01176e-05	0.00124382
Fam105a	223433	ENSMUSG00000056069	1114.26	1729.36	499.164	0.288641	-1.79265	1.13656e-05	0.000360598
Fam110b	242297	ENSMUSG00000049119	53.82	86.4799	21.1602	0.244683	-2.03101	0.00513335	0.0436978
Fam114a1	68303	ENSMUSG00000029185	456.385	291.064	621.707	2.13598	1.0949	0.00869764	0.0633823
Fam117a	215512	ENSMUSG00000038893	88.3911	147.972	28.8098	0.194697	-2.3607	0.000171638	0.00341758
Fam117b	72750	ENSMUSG00000041040	813.038	1119.09	506.984	0.453031	-1.14232	0.00347377	0.0329913
Fam129a	63913	ENSMUSG00000026483	1820.91	2493.25	1148.58	0.460675	-1.11818	0.00324895	0.0313198
Fam134c	67998	ENSMUSG00000017802	707.226	1005.6	408.855	0.40658	-1.29839	0.000951791	0.0126742
Fam160a2	74349	ENSMUSG00000044465	285.467	396.336	174.599	0.440533	-1.18268	0.00920886	0.0659405
Fam173a	214917	ENSMUSG00000057411	138.932	249.647	28.2164	0.113025	-3.14529	3.05348e-08	2.09902e-06
Fam189a1	70638	ENSMUSG00000030518	9.80026	0.669831	18.9307	28.2619	4.82079	0.015618	0.0928451
Fam189b	68521	ENSMUSG00000032657	99.3982	149.804	48.9927	0.327046	-1.61243	0.00647775	0.051656
Fam193b	212483	ENSMUSG00000021495	250.253	382.75	117.756	0.307659	-1.7006	0.000311839	0.00542044
Fam195b	192173	ENSMUSG00000061111	156.326	234.153	78.4991	0.335247	-1.5767	0.00243029	0.0252496
Fam198b	68659	ENSMUSG00000027955	986.91	1625.55	348.272	0.214249	-2.22264	2.33551e-06	9.17418e-05
Fam19a2	268354	ENSMUSG00000044071	14.6	1.40136	27.7987	19.8369	4.31012	0.00841575	0.0619049
Fam210b	67017	ENSMUSG00000027495	167.106	239.925	94.2875	0.392988	-1.34744	0.00802619	0.0599559
Fam214a	235493	ENSMUSG00000034858	194.52	362.062	26.9775	0.0745107	-3.74641	0.000223499	0.00420834
Fam219b	78323	ENSMUSG00000032305	295.931	423.411	168.451	0.397842	-1.32973	0.00249198	0.0257262
Fam234a	106581	ENSMUSG00000024187	761.861	1202.73	320.989	0.266883	-1.90572	2.74499e-06	0.000106857
Fam26f	215900	ENSMUSG00000046031	145.69	60.5062	230.873	3.8157	1.93195	0.0125668	0.0812293
Fam3a	66294	ENSMUSG00000031399	412.985	554.349	271.62	0.48998	-1.02921	0.0137164	0.0856536
Fam3c	27999	ENSMUSG00000029672	736.415	1204.06	268.769	0.223219	-2.16347	1.68768e-07	9.37039e-06
Fam46c	74645	ENSMUSG00000044468	134.818	226.605	43.0314	0.189896	-2.39672	0.0155005	0.0923364
Fam53b	77938	ENSMUSG00000030956	638.947	1029.62	248.27	0.241127	-2.05214	2.09727e-05	0.00059559
Fam57a	116972	ENSMUSG00000069808	129.552	58.1286	200.976	3.45744	1.7897	0.00163945	0.0188963
Fam65a	75687	ENSMUSG00000038604	572.332	819.754	324.909	0.396349	-1.33516	0.0011443	0.0144568
Fam69a	67266	ENSMUSG00000029270	415.804	584.881	246.728	0.421843	-1.24522	0.00357386	0.0337025
Fam78a	241303	ENSMUSG00000050592	395.529	571.051	220.007	0.385266	-1.37607	0.00152557	0.0178563
Fam83f	213956	ENSMUSG00000022408	204.382	386.444	22.3203	0.057758	-4.11383	0.000669638	0.00969604
Fam84b	399603	ENSMUSG00000072568	447.233	715.635	178.831	0.249891	-2.00063	0.0103027	0.0709636
Fam89b	17826	ENSMUSG00000024939	494.857	803.685	186.029	0.23147	-2.1111	6.24831e-07	2.94931e-05
Fam8a1	97863	ENSMUSG00000069237	395.788	170.146	621.429	3.65234	1.86882	2.08756e-05	0.000593994
Fam98b	68215	ENSMUSG00000027349	1793.3	927.794	2658.8	2.86573	1.5189	0.00163294	0.0188457
Fam98c	73833	ENSMUSG00000030590	54.7185	92.7348	16.7023	0.180108	-2.47306	0.00105512	0.0136504
Fancg	60534	ENSMUSG00000028453	145.423	220.178	70.668	0.320958	-1.63955	0.00178059	0.0200554
Fastk	66587	ENSMUSG00000028959	261.125	355.451	166.799	0.469261	-1.09154	0.0137839	0.0858609
Fat1	14107	ENSMUSG00000070047	39.995	9.34493	70.6451	7.55972	2.91833	0.0135667	0.0850098
Fat2	245827	ENSMUSG00000055333	25.9251	4.71487	47.1353	9.99715	3.32152	0.00718424	0.0555344
Fat3	270120	ENSMUSG00000074505	741.962	1048.36	435.56	0.415466	-1.2672	0.00231134	0.0244393
Fat4	329628	ENSMUSG00000046743	29.2819	4.38328	54.1806	12.3607	3.62769	0.00487097	0.0420847
Fau	14109	ENSMUSG00000038274	4050.19	5764.27	2336.1	0.405272	-1.30304	0.000291466	0.00515038
Fblim1	74202	ENSMUSG00000006219	1651.47	2939.9	363.044	0.123489	-3.01755	9.88343e-10	1.00712e-07
Fbln2	14115	ENSMUSG00000064080	14.8393	1.9478	27.7308	14.237	3.83157	0.004935	0.04242
Fbn1	14118	ENSMUSG00000027204	34.5232	5.4466	63.5997	11.677	3.54559	0.00392949	0.0358078
Fbn2	10264229514119	ENSMUSG00000024598	28.0746	2.13289	54.0162	25.3254	4.66251	0.0102152	0.0705294
Fbxl20	72194	ENSMUSG00000020883	648.109	1033.36	262.853	0.254367	-1.97502	1.44276e-06	6.06624e-05
Fbxl5	242960	ENSMUSG00000039753	1362.31	566.035	2158.58	3.81351	1.93112	1.49685e-06	6.23316e-05
Fbxl6	30840	ENSMUSG00000022559	109.342	172.678	46.0059	0.266426	-1.90819	0.00082789	0.0113822
Fbxl8	50788	ENSMUSG00000033313	66.2806	100.372	32.1892	0.320699	-1.64071	0.0112022	0.0755372
Fbxo21	231670	ENSMUSG00000032898	352.291	521.012	183.57	0.352334	-1.50498	0.000459732	0.00728631
Fbxo22	71999	ENSMUSG00000032309	1250.84	842.211	1659.48	1.97038	0.978476	0.0114458	0.0767321
Fbxo30	71865	ENSMUSG00000047648	786.991	534.865	1039.12	1.94277	0.958112	0.0129491	0.0827229
Fbxo6	50762	ENSMUSG00000055401	209.985	308.578	111.393	0.360987	-1.46998	0.00197596	0.0216917
Fbxo8	50753	ENSMUSG00000038206	377.955	511.431	244.478	0.478027	-1.06484	0.01575	0.0933095
Fbxw4	30838	ENSMUSG00000040913	143.889	214.38	73.3983	0.342375	-1.54635	0.00305392	0.0298793
Fcgr2b	14130	ENSMUSG00000026656	18965.4	791.24	37139.6	46.9385	5.5527	3.52273e-09	3.14558e-07
Fcgr3	14131	ENSMUSG00000059498	9099.82	4907.29	13292.3	2.70869	1.4376	0.000206596	0.00396659
Fcgr4	246256	ENSMUSG00000059089	548.617	324.198	773.037	2.38446	1.25366	0.00857018	0.0627478
Fcgrt	14132	ENSMUSG00000003420	418.697	735.855	101.539	0.137987	-2.85739	1.52269e-10	1.92537e-08
Fcrl1	229499	ENSMUSG00000059994	102.047	159.108	44.9852	0.282733	-1.82249	0.00170707	0.0194295
Fcrlb	435653	ENSMUSG00000070524	41.858	1.96719	81.7488	41.5561	5.37699	0.000648436	0.00943938
Fes	14159	ENSMUSG00000053158	1452.25	2085.76	818.729	0.392532	-1.34912	0.000575384	0.00865224
Fgd2	26382	ENSMUSG00000024013	485.867	754.757	216.976	0.287477	-1.79848	0.000180993	0.00356289
Fgd4	224014	ENSMUSG00000022788	2828.7	4477.84	1179.56	0.263421	-1.92456	5.56602e-07	2.67834e-05
Fgd6	13998	ENSMUSG00000020021	1136.57	1488.49	784.655	0.527149	-0.923717	0.0130086	0.0828994
Fgf12	14167	ENSMUSG00000022523	8.71174	0.243843	17.1796	70.4538	6.13861	0.0167819	0.0969367
Fgfr2	14183	ENSMUSG00000030849	13.7134	2.12329	25.3034	11.9171	3.57496	0.0164359	0.0957215
Fhod1	234686	ENSMUSG00000014778	365.427	491.962	238.892	0.48559	-1.04219	0.0145831	0.0888785
Fibp	58249	ENSMUSG00000024911	373.945	530.62	217.27	0.409465	-1.28819	0.00281919	0.0282984
Fig4	103199	ENSMUSG00000038417	594.325	790.056	398.595	0.504515	-0.987032	0.0158477	0.0937602
Filip1l	78749	ENSMUSG00000043336	6003.3	1203.91	10802.7	8.97303	3.1656	3.1861e-14	8.23772e-12
Fkbp4	14228	ENSMUSG00000030357	460.209	694.488	225.931	0.32532	-1.62007	8.51151e-05	0.00190991
Flcn	216805	ENSMUSG00000032633	1130.11	1863.9	396.335	0.212638	-2.23353	5.73811e-05	0.00139827
Flnb	286940	ENSMUSG00000025278	2931.2	1061.02	4801.38	4.52526	2.178	0.000158766	0.00321482
Flnc	68794	ENSMUSG00000068699	26.0044	5.55059	46.4582	8.36996	3.06522	0.0154001	0.0919998
Flot2	14252	ENSMUSG00000061981	467.537	649.246	285.828	0.440247	-1.18362	0.00398593	0.036132
Flt1	14254	ENSMUSG00000029648	734.517	444.26	1024.77	2.3067	1.20583	0.00713509	0.0552284
Fmnl1	57778	ENSMUSG00000055805	2506.92	3655.21	1358.63	0.371697	-1.4278	0.000121195	0.00257603
Fmnl3	22379	ENSMUSG00000023008	1029.34	1387	671.688	0.484275	-1.0461	0.00358724	0.0337133
Fmo2	55990	ENSMUSG00000040170	10.5291	0.913674	20.1445	22.0478	4.46256	0.0148397	0.0898525
Fn1	14268	ENSMUSG00000026193	145.805	79.938	211.672	2.64795	1.40488	0.00881559	0.0640036
Fnbp1	14269	ENSMUSG00000075415	3926.51	5177.58	2675.45	0.516738	-0.952496	0.00820487	0.0607925
Fnbp1l	214459	ENSMUSG00000039735	10785.9	3442.65	18129.1	5.26603	2.39672	0.000619635	0.00914587
Fndc3a	319448	ENSMUSG00000033487	5680.88	3583.45	7778.31	2.17062	1.11811	0.00239175	0.0249743
Fnip2	329679	ENSMUSG00000061175	11243.7	17605.8	4881.59	0.277273	-1.85062	0.00218469	0.0233038
Folh1	53320	ENSMUSG00000001773	9.03716	0	18.0743	NaN	NaN	0.00416206	0.0372992
Fosl2	14284	ENSMUSG00000029135	2077.57	685.397	3469.74	5.06238	2.33982	0.000333317	0.00569995
Foxj2	60611	ENSMUSG00000003154	877.018	1171.52	582.512	0.497226	-1.00803	0.00992806	0.0690975
Foxk1	17425	ENSMUSG00000056493	480.286	693.751	266.821	0.384606	-1.37855	0.000930487	0.0124669
Foxn3	71375	ENSMUSG00000033713	611.452	854.204	368.7	0.431631	-1.21213	0.00283921	0.0284463
Foxo3	56484	ENSMUSG00000048756	757.594	1088.84	426.348	0.391562	-1.35269	0.000720813	0.0102633
Foxo4	54601	ENSMUSG00000042903	271.749	430.663	112.835	0.262002	-1.93235	2.37004e-05	0.000662653
Foxred2	239554	ENSMUSG00000016552	470.934	709.629	232.238	0.327267	-1.61146	0.0049645	0.0425743
Fpr1	14293	ENSMUSG00000045551	647.241	5.65459	1288.83	227.926	7.83242	2.08004e-09	1.9477e-07
Fpr2	14289	ENSMUSG00000052270	702.861	8.10947	1397.61	172.343	7.42914	5.54877e-05	0.00136342
Frat2	212398	ENSMUSG00000047604	24.7802	44.6768	4.88356	0.109309	-3.19352	0.00392145	0.0357722
Frmd4b	232288	ENSMUSG00000030064	2317.24	3202.56	1431.92	0.447118	-1.16127	0.00318338	0.030832
Frmpd1	666060	ENSMUSG00000035615	16.2461	1.09582	31.3963	28.651	4.84051	0.000858795	0.0116773
Frmpd4	333605	ENSMUSG00000049176	17.7107	2.58493	32.8364	12.703	3.6671	0.010445	0.0716305
Fry	320365	ENSMUSG00000056602	622.065	965.005	279.124	0.289246	-1.78963	1.20177e-05	0.000374879
Fscn1	14086	ENSMUSG00000029581	107.419	16.5907	198.248	11.9494	3.57886	4.47494e-09	3.87615e-07
Fsd1l	319636	ENSMUSG00000054752	462.214	238.467	685.961	2.87654	1.52434	0.000255088	0.00468102
Fth1	14319	ENSMUSG00000024661	576696	311616	841775	2.70132	1.43367	0.000112519	0.00242434
Ftl1	10086244614325	ENSMUSG00000050708	82279.5	129356	35202.8	0.272139	-1.87759	0.000393253	0.0064633
Fto	26383	ENSMUSG00000055932	779.781	1100.98	458.584	0.416524	-1.26353	0.00132721	0.0161934
Ftsj2	68017	ENSMUSG00000029557	50.028	79.4075	20.6486	0.260033	-1.94323	0.00977187	0.0684782
Fubp1	51886	ENSMUSG00000028034	3226.49	2219.27	4233.7	1.90771	0.931838	0.0147729	0.089628
Fuca1	71665	ENSMUSG00000028673	1634.43	2468.49	800.37	0.324235	-1.62489	2.47303e-05	0.000684349
Fuk	234730	ENSMUSG00000033703	85.9411	133.715	38.1673	0.285438	-1.80875	0.0029781	0.0293958
Fut8	53618	ENSMUSG00000021065	1612.91	770.656	2455.17	3.18582	1.67166	0.0149333	0.0902513
Fyb	23880	ENSMUSG00000022148	19326	12948.4	25703.6	1.98508	0.989196	0.00694614	0.0542342
Fzd3	14365	ENSMUSG00000007989	26.4133	6.44487	46.3818	7.1967	2.84733	0.0050615	0.0432136
Fzd5	14367	ENSMUSG00000045005	207.156	291.052	123.259	0.423495	-1.23958	0.00954666	0.0673632
G6pc2	14378	ENSMUSG00000005232	8.41334	0	16.8267	NaN	NaN	0.00681169	0.0535385
Gaa	14387	ENSMUSG00000025579	1114.01	1657.45	570.564	0.344243	-1.5385	0.000154902	0.0031458
Gab1	14388	ENSMUSG00000031714	679.29	151.874	1206.71	7.94544	2.99013	6.04283e-06	0.000211475
Gab3	210710	ENSMUSG00000032750	208.553	300.038	117.068	0.390176	-1.3578	0.00491741	0.0423381
Gabarapl1	57436	ENSMUSG00000030161	751.002	1126.54	375.467	0.333293	-1.58514	0.00315612	0.030659
Gabpb1	14391	ENSMUSG00000027361	837.718	561.27	1114.17	1.98508	0.989197	0.0129469	0.0827229
Gabrb2	14401	ENSMUSG00000007653	18.1821	3.19306	33.1712	10.3885	3.37692	0.0073961	0.0564925
Gabrp	216643	ENSMUSG00000020159	9.8263	0.243843	19.4088	79.5955	6.31461	0.00935428	0.0666026
Gadd45b	17873	ENSMUSG00000015312	762.73	490.729	1034.73	2.10856	1.07626	0.00519028	0.0439879
Gadd45g	23882	ENSMUSG00000021453	113.153	198.462	27.8436	0.140297	-2.83344	2.21708e-05	0.000625513
Galm	319625	ENSMUSG00000035473	299.321	406.342	192.3	0.473246	-1.07934	0.0135737	0.0850098
Galnt12	230145	ENSMUSG00000039774	152.588	267.898	37.2783	0.139152	-2.84527	1.62508e-07	9.05183e-06
Galt	14430	ENSMUSG00000036073	199.652	291.553	107.751	0.369575	-1.43606	0.00285594	0.0285622
Gamt	14431	ENSMUSG00000020150	218.087	340.932	95.2414	0.279356	-1.83982	0.000115243	0.00246691
Gan	209239	ENSMUSG00000052557	329.221	449.694	208.749	0.464202	-1.10718	0.0113269	0.0761118
Ganc	76051	ENSMUSG00000062646	218.299	304.93	131.668	0.431799	-1.21157	0.0137441	0.0856744
Gas2l1	78926	ENSMUSG00000034201	707.736	1002.78	412.69	0.411545	-1.28088	0.001371	0.0165735
Gas7	14457	ENSMUSG00000033066	15886	6552.61	25219.4	3.84876	1.94439	5.52597e-08	3.58526e-06
Gatsl2	80909	ENSMUSG00000015944	308.067	471.216	144.918	0.307541	-1.70115	0.00018587	0.0036455
Gbe1	74185	ENSMUSG00000022707	1157.57	589.94	1725.2	2.92436	1.54812	0.00474844	0.0412632
Gbp3	55932	ENSMUSG00000028268	1411.5	171.203	2651.8	15.4892	3.95319	6.31327e-07	2.96381e-05
Gbp4	17472	ENSMUSG00000079363	43.4586	12.0315	74.8856	6.22412	2.63787	0.00376595	0.0347193
Gbp7	229900	ENSMUSG00000040253	2251.57	288.339	4214.8	14.6175	3.86963	1.75121e-09	1.69476e-07
Gcdh	270076	ENSMUSG00000003809	187.978	280.24	95.7172	0.341555	-1.54981	0.00144125	0.0172423
Gch1	14528	ENSMUSG00000037580	529.116	170.847	887.385	5.19403	2.37686	2.04972e-08	1.48566e-06
Gcnt1	14537	ENSMUSG00000038843	1137.1	1941.59	332.621	0.171314	-2.54529	0.000588423	0.00881007
Gcnt2	14538	ENSMUSG00000021360	197.641	38.5375	356.744	9.25706	3.21055	0.00692862	0.0541627
Gcnt3	72077	ENSMUSG00000032226	9.04553	0.243843	17.8472	73.1916	6.19361	0.00926394	0.0661497
Gda	14544	ENSMUSG00000058624	4102.72	1200.08	7005.35	5.8374	2.54533	1.45397e-05	0.000442657
Gdpd5	233552	ENSMUSG00000035314	187.341	311.539	63.1431	0.202681	-2.30271	4.26003e-06	0.000157685
Gfi1	14581	ENSMUSG00000029275	73.4029	1.33966	145.466	108.584	6.76267	9.58736e-05	0.00210896
Gfpt2	14584	ENSMUSG00000020363	16.2378	2.19164	30.284	13.8179	3.78847	0.00397177	0.0360413
Gga2	74105	ENSMUSG00000030872	499.125	706.603	291.648	0.412746	-1.27667	0.00204141	0.0222139
Ggct	110175	ENSMUSG00000002797	158.437	58.8252	258.048	4.38669	2.13313	3.94026e-05	0.00101573
Ggnbp2	217039	ENSMUSG00000020530	3936.88	2593.68	5280.09	2.03575	1.02556	0.00682035	0.053558
Ggps1	14593	ENSMUSG00000021302	786.497	509.173	1063.82	2.08931	1.06303	0.00702707	0.0546088
Gigyf1	57330	ENSMUSG00000029714	836.479	1173.76	499.196	0.425296	-1.23346	0.00188852	0.0209576
Ginm1	215751	ENSMUSG00000040006	1960.86	1112.49	2809.23	2.52518	1.33639	0.000429115	0.00690851
Gipc1	67903	ENSMUSG00000019433	371.933	500.908	242.958	0.485035	-1.04384	0.0140572	0.0869051
Git1	216963	ENSMUSG00000011877	853.516	1284.26	422.772	0.329195	-1.60299	4.32437e-05	0.00109359
Gja1	14609	ENSMUSG00000050953	535.573	42.0021	1029.14	24.5022	4.61484	0.00131113	0.0160628
Gk	14933	ENSMUSG00000025059	2292.96	551.898	4034.03	7.30938	2.86975	0.00114149	0.0144466
Gla	11605	ENSMUSG00000031266	3118	4480.66	1755.35	0.391761	-1.35195	0.000289997	0.00514188
Glipr2	384009	ENSMUSG00000028480	73.0649	33.4271	112.703	3.3716	1.75343	0.00981964	0.0686463
Glmp	56700	ENSMUSG00000001418	2162.55	3193.56	1131.53	0.354317	-1.49689	8.01553e-05	0.00182461
Glp2r	93896	ENSMUSG00000049928	17.4676	3.29726	31.638	9.59525	3.26232	0.00896496	0.0646747
Glrx3	30926	ENSMUSG00000031068	242.823	141.939	343.706	2.4215	1.2759	0.00666226	0.0528194
Glrx5	73046	ENSMUSG00000021102	334.588	493.232	175.944	0.356716	-1.48715	0.000680734	0.0098274
Gltp	56356	ENSMUSG00000011884	2865.28	4605.35	1125.21	0.244328	-2.03311	1.28153e-05	0.000395722
Gltscr2	68077	ENSMUSG00000041560	1052.65	1439.87	665.44	0.462154	-1.11356	0.0036423	0.0339747
Glul	14645	ENSMUSG00000026473	6481.35	8726.48	4236.21	0.485444	-1.04262	0.00472102	0.0411173
Gm10220	434689	ENSMUSG00000067698	15.8287	1.76565	29.8918	16.9296	4.08148	0.0126757	0.081504
Gm10696	100043188	ENSMUSG00000074424	20.7871	2.82877	38.7453	13.6969	3.77578	0.0126764	0.081504
Gm11127	100529082	ENSMUSG00000079492	97.7272	43.1199	152.334	3.53281	1.82082	0.0125135	0.0811573
Gm12942	100039968	ENSMUSG00000070737	144.632	215.052	74.211	0.345083	-1.53498	0.00318753	0.030832
Gm13051	626316668033	ENSMUSG00000066009	21.4263	5.68729	37.1653	6.53479	2.70814	0.00878287	0.0638731
Gm13154	1.00862e+23	ENSMUSG00000065999	19.6345	4.36703	34.9019	7.99214	2.99858	0.0135876	0.085066
Gm13251	433791	ENSMUSG00000070605	625.534	385.446	865.622	2.24577	1.16721	0.00239846	0.0250041
Gm2a	14667	ENSMUSG00000000594	3528.11	4706.64	2349.58	0.499206	-1.00229	0.00689127	0.0539194
Gm4297	100043216	ENSMUSG00000081218	32.3708	5.61894	59.1226	10.522	3.39534	0.0101529	0.0702393
Gm4884	233164	ENSMUSG00000048312	11.8692	1.27797	22.4604	17.5751	4.13546	0.00765498	0.0578408
Gm5464	432870	ENSMUSG00000075553	79.8913	41.6824	118.1	2.83334	1.5025	0.0150593	0.0905804
Gm5622	434459	ENSMUSG00000079244	22.5135	0.913674	44.1132	48.2812	5.59339	0.00527206	0.0445079
Gm6377	622976	ENSMUSG00000048621	1438.38	81.0082	2795.76	34.5121	5.10903	1.71739e-13	3.81414e-11
Gm7102	633057	ENSMUSG00000012429	746.173	455.837	1036.51	2.27386	1.18514	0.0114231	0.0766687
Gm7534	665186	ENSMUSG00000073747	9.37467	0.669831	18.0795	26.9911	4.75441	0.0154182	0.0920365
Gmpr	66355	ENSMUSG00000000253	57.873	97.7685	17.9775	0.183878	-2.44318	0.0007219	0.0102633
Gna12	14673	ENSMUSG00000000149	1680.48	2706.07	654.889	0.242008	-2.04687	1.62183e-06	6.6893e-05
Gnb1	14688	ENSMUSG00000029064	13172.9	7936.32	18409.6	2.31966	1.21391	0.0010009	0.0131353
Gng12	14701	ENSMUSG00000036402	3822.53	2191.71	5453.35	2.48817	1.31509	0.000505873	0.00783831
Gng2	14702	ENSMUSG00000043004	2303.29	3077.5	1529.08	0.496859	-1.00909	0.00885366	0.0641993
Gng7	14708	ENSMUSG00000048240	38.2817	68.2755	8.28795	0.12139	-3.04228	0.000458507	0.00727355
Gnl2	230737	ENSMUSG00000028869	1391.4	965.864	1816.94	1.88116	0.911622	0.0164732	0.095745
Gnpda1	26384	ENSMUSG00000052102	1286.51	2314.84	258.169	0.111528	-3.16453	7.98845e-11	1.08112e-08
Gnptg	214505	ENSMUSG00000035521	493.823	697.875	289.77	0.415218	-1.26806	0.00179728	0.0201908
Gorab	98376	ENSMUSG00000040124	393.104	204.779	581.428	2.83929	1.50553	0.000453292	0.00721062
Gorasp1	74498	ENSMUSG00000032513	171.543	262.667	80.4192	0.306165	-1.70762	0.000681332	0.0098274
Got1	14718	ENSMUSG00000025190	623.796	961.728	285.864	0.29724	-1.7503	2.45723e-05	0.000681065
Gpaa1	14731	ENSMUSG00000022561	150.79	235.522	66.0582	0.280476	-1.83405	0.000530677	0.00810663
Gpbp1	73274	ENSMUSG00000032745	2069.17	1422.28	2716.07	1.90966	0.933313	0.0142639	0.0877154
Gpc6	23888	ENSMUSG00000058571	179.151	79.5355	278.765	3.50492	1.80938	0.00676192	0.0532681
Gpd1l	333433	ENSMUSG00000050627	461.306	738.122	184.491	0.249947	-2.00031	2.93801e-06	0.0001131
Gpd2	14571	ENSMUSG00000026827	3416.3	638.306	6194.29	9.70427	3.27862	4.28977e-16	1.65137e-13
Gpnmb	93695	ENSMUSG00000029816	125990	190854	61125.8	0.320275	-1.64262	0.00755376	0.0573445
Gpr137	107173	ENSMUSG00000024958	235.286	369.766	100.807	0.272623	-1.87502	6.8167e-05	0.00160442
Gpr146	80290	ENSMUSG00000044197	932.868	1347.76	517.971	0.384319	-1.37962	0.00805368	0.0600577
Gpr158	241263	ENSMUSG00000045967	11.8996	0.913674	22.8855	25.0478	4.64661	0.00989342	0.0689426
Gpr160	71862	ENSMUSG00000037661	111.837	166.38	57.2931	0.34435	-1.53805	0.00861817	0.0629926
Gpr176	381413	ENSMUSG00000040133	124.269	210.634	37.9052	0.179958	-2.47427	0.003081	0.0300688
Gpr18	110168	ENSMUSG00000050350	174.29	35.6611	312.918	8.77477	3.13336	1.1078e-07	6.6174e-06
Gpr183	321019	ENSMUSG00000051212	477.427	805.155	149.699	0.185925	-2.4272	0.000286468	0.00508973
Gpr31b	436440	ENSMUSG00000071311	107.13	14.8955	199.365	13.3842	3.74246	1.86597e-09	1.77606e-07
Gpr84	80910	ENSMUSG00000063234	2216.95	124.517	4309.39	34.6087	5.11306	2.19818e-17	1.15391e-14
Gpr85	64450	ENSMUSG00000048216	499.787	114.216	885.359	7.75165	2.9545	2.85507e-11	4.26365e-09
Gprasp2	245607	ENSMUSG00000072966	10.8006	0.939724	20.6616	21.9869	4.45857	0.0126262	0.0813911
Gpsm3	106512	ENSMUSG00000034786	524.001	821.582	226.42	0.275591	-1.8594	2.75765e-05	0.000748758
Gpt2	108682	ENSMUSG00000031700	138.412	217.507	59.3177	0.272716	-1.87453	0.000427273	0.00689166
Gpx1	14775	ENSMUSG00000063856	4355.17	6146.24	2564.1	0.417182	-1.26125	0.01124	0.0757036
Gramd1a	52857	ENSMUSG00000001248	2309.89	735.952	3883.83	5.27728	2.3998	1.06437e-09	1.07825e-07
Grb7	14786	ENSMUSG00000019312	9.14641	0.425989	17.8668	41.9421	5.39033	0.00897113	0.0646747
Grcc10	14790	ENSMUSG00000072772	863.096	1232.49	493.703	0.400575	-1.31986	0.000830193	0.0114048
Grk6	26385	ENSMUSG00000074886	334.764	481.975	187.553	0.389134	-1.36166	0.00132715	0.0161934
Grn	14824	ENSMUSG00000034708	35229.9	48582.1	21877.7	0.450324	-1.15097	0.00160155	0.0185452
Gse1	382034	ENSMUSG00000031822	799.619	1090.05	509.184	0.467118	-1.09814	0.00515443	0.0437911
Gsn	227753	ENSMUSG00000026879	5028.49	7581.6	2475.38	0.326498	-1.61485	1.44093e-05	0.000440234
Gspt1	14852	ENSMUSG00000062203	4132.48	2611.34	5653.62	2.16503	1.11439	0.00291707	0.0289916
Gsr	14782	ENSMUSG00000031584	3113	880.509	5345.48	6.0709	2.60191	0.00291268	0.0289813
Gstm5	14866	ENSMUSG00000004032	120.145	172.577	67.7126	0.392362	-1.34974	0.0124002	0.0806038
Gsto1	14873	ENSMUSG00000025068	732.054	1072.42	391.693	0.365243	-1.45307	0.000307459	0.00537427
Gstt1	14871	ENSMUSG00000001663	56.0229	21.9973	90.0484	4.09361	2.03337	0.00361674	0.0338663
Gstt3	103140	ENSMUSG00000001665	57.3595	91.9002	22.8189	0.248301	-2.00984	0.00607301	0.0495071
Gstt4	75886	ENSMUSG00000009093	12.7201	0.425989	25.0143	58.7206	5.8758	0.00118687	0.0148556
Gtf2i	14886	ENSMUSG00000060261	1768.56	2605.18	931.935	0.357724	-1.48308	7.45915e-05	0.001716
Gtf3c6	67371	ENSMUSG00000019837	661.229	445.335	877.123	1.96958	0.977889	0.0152372	0.0914194
Gtpbp4	69237	ENSMUSG00000021149	2466.14	1135.96	3796.32	3.34196	1.7407	5.91476e-06	0.000208255
Gucy2e	14919	ENSMUSG00000020890	20.6887	1.15752	40.2199	34.7467	5.1188	0.0120923	0.0792866
Guk1	14923	ENSMUSG00000020444	149.444	220.837	78.0509	0.353433	-1.50049	0.00331638	0.0318457
Gulo	268756	ENSMUSG00000034450	7.54327	0	15.0865	NaN	NaN	0.00862579	0.0630218
Gusb	110006	ENSMUSG00000025534	2386.46	3560.15	1212.77	0.34065	-1.55364	4.75822e-05	0.00119109
Gys1	14936	ENSMUSG00000003865	1201.2	594.704	1807.69	3.03965	1.60391	0.000178074	0.00352948
H2-Q4	15015	ENSMUSG00000035929	1266.12	655.877	1876.35	2.86083	1.51643	9.16171e-05	0.00203472
H2afj	232440	ENSMUSG00000060032	350.554	510.828	190.28	0.372492	-1.42472	0.000814793	0.0112512
H2afv	77605	ENSMUSG00000041126	206.714	341.481	71.947	0.210691	-2.2468	0.00041952	0.00678557
H3f3a	1.02642e+31	ENSMUSG00000016559,ENSMUSG00000060743	6729.79	4138.19	9321.39	2.6018	1.37951	0.0012257	0.0152315
H3f3b	1.02642e+31	ENSMUSG00000016559,ENSMUSG00000060743	6729.79	4138.19	9321.39	2.6018	1.37951	0.0012257	0.0152315
H60b	667281	ENSMUSG00000075297	274.466	162.26	386.671	2.38303	1.2528	0.00849413	0.0624019
H6pd	100198	ENSMUSG00000028980	1147.21	1585.17	709.253	0.447429	-1.16027	0.014942	0.0902513
Habp4	56541	ENSMUSG00000021476	153.31	233.633	72.9878	0.312404	-1.67852	0.00086805	0.0117847
Hacd4	66775	ENSMUSG00000028497	1087.2	1577.89	596.525	0.378053	-1.40334	0.000482353	0.00759618
Hadh	15107	ENSMUSG00000027984	692.658	1071.3	314.015	0.293116	-1.77046	1.64142e-05	0.000491944
Haghl	68977	ENSMUSG00000061046	158.703	238.427	78.9791	0.331251	-1.59401	0.00244559	0.025353
Has1	15116	ENSMUSG00000003665	131.933	13.7776	250.088	18.1518	4.18204	7.28831e-07	3.36681e-05
Haus4	219072	ENSMUSG00000022177	95.4269	165.404	25.4496	0.153863	-2.70028	1.79307e-05	0.000527245
Haus8	76478	ENSMUSG00000035439	545.672	833.13	258.215	0.309934	-1.68997	3.81814e-05	0.000990144
Hcar2	80885	ENSMUSG00000045502	1046.67	19.2142	2074.12	107.947	6.75418	2.84776e-07	1.49038e-05
Hcfc1r1	353502	ENSMUSG00000023904	851.34	1133.77	568.913	0.50179	-0.994844	0.0107869	0.0733943
Hck	15162	ENSMUSG00000003283	6795.2	2408.37	11182	4.64299	2.21505	8.5911e-09	6.82677e-07
Hcls1	15163	ENSMUSG00000022831	6156.02	3984.71	8327.33	2.08982	1.06338	0.00458059	0.0401566
Hdac10	170787	ENSMUSG00000062906	159.48	234.234	84.7249	0.36171	-1.46709	0.00363923	0.0339747
Hdac5	15184	ENSMUSG00000008855	1238.48	2021.95	455.008	0.225034	-2.15178	3.53948e-08	2.39509e-06
Hdc	15186	ENSMUSG00000027360	33.6377	2.18499	65.0904	29.7898	4.89675	5.64569e-06	0.000200822
Heatr5a	320487	ENSMUSG00000035181	3732.02	5331.63	2132.4	0.399953	-1.3221	0.000330603	0.00568243
Heatr6	217026	ENSMUSG00000000976	1076.46	721.915	1431.01	1.98224	0.98713	0.0110461	0.0748635
Heatr9	629303	ENSMUSG00000018925	23.1981	3.67115	42.725	11.638	3.54078	0.00253936	0.0260832
Hebp1	15199	ENSMUSG00000042770	303.493	444.389	162.597	0.365889	-1.45052	0.00125824	0.0155578
Hectd3	76608	ENSMUSG00000046861	526.196	775.163	277.228	0.357638	-1.48343	0.000330808	0.00568243
Heg1	77446	ENSMUSG00000075254	75.0724	8.20407	141.941	17.3013	4.11281	7.46914e-09	6.07455e-07
Heph	15203	ENSMUSG00000031209	17.3077	2.00949	32.606	16.226	4.02023	0.00245214	0.0254058
Herc3	73998	ENSMUSG00000029804	444.717	607.128	282.306	0.464986	-1.10474	0.00936338	0.0666127
Herc6	67138	ENSMUSG00000029798	1968.9	808.831	3128.97	3.86851	1.95178	1.79391e-07	9.89679e-06
Hes6	55927	ENSMUSG00000067071	186.321	284.486	88.1561	0.309879	-1.69022	0.000645071	0.00942503
Hexb	15212	ENSMUSG00000021665	1981.28	2606.84	1355.73	0.520066	-0.943235	0.0105833	0.0722926
Hfe	15216	ENSMUSG00000006611	731.119	1142.13	320.103	0.280267	-1.83512	6.38235e-06	0.000221123
Hhex	15242	ENSMUSG00000024986	319.554	539.873	99.2341	0.18381	-2.44371	1.0985e-07	6.58451e-06
Hibch	227095	ENSMUSG00000041426	183.688	257.875	109.501	0.424629	-1.23573	0.0104225	0.0715331
Higd1a	56295	ENSMUSG00000038412	806.769	342.606	1270.93	3.7096	1.89126	5.96767e-06	0.000209267
Hip1	215114	ENSMUSG00000039959	2843.42	4841.62	845.222	0.174574	-2.51809	6.84322e-11	9.71681e-09
Hist1h2ab	319172	ENSMUSG00000061615	61.971	117.622	6.32016	0.0537329	-4.21805	0.000336493	0.00573419
Hist1h2bj	319183	ENSMUSG00000069300	41.3258	71.3553	11.2964	0.158313	-2.65915	0.00110607	0.0141301
Hist2h2ab	621893	ENSMUSG00000063689	21.4172	37.1624	5.67201	0.152627	-2.71191	0.0144881	0.0885595
Hist2h2ac	319176	ENSMUSG00000068855	406.933	646.818	167.048	0.258261	-1.9531	0.00242731	0.025239
Hist3h2a	319162	ENSMUSG00000078851	1292.48	1824.83	760.132	0.41655	-1.26344	0.00702983	0.0546088
Hivep2	15273	ENSMUSG00000015501	1812.77	474.036	3151.5	6.64823	2.73297	1.18331e-10	1.55292e-08
Hk2	15277	ENSMUSG00000000628	2672.48	1665.64	3679.32	2.20895	1.14336	0.0036869	0.0341907
Hk3	212032	ENSMUSG00000025877	2790.92	3921.33	1660.5	0.423454	-1.23972	0.000792062	0.0110031
Hlcs	110948	ENSMUSG00000040820	145.766	206.186	85.3466	0.413931	-1.27254	0.0126309	0.0813911
Hmbs	15288	ENSMUSG00000032126	266.935	398.89	134.981	0.338391	-1.56324	0.000492996	0.0077147
Hmcn1	545370	ENSMUSG00000066842	53.0889	8.7272	97.4506	11.1663	3.48108	0.0152301	0.0914194
Hmg20b	15353	ENSMUSG00000020232	369.249	551.727	186.771	0.33852	-1.56269	0.000287685	0.00510611
Hmga1	15361	ENSMUSG00000046711	508.085	828.025	188.146	0.227222	-2.13782	0.000889257	0.0120161
Hmga2	15364	ENSMUSG00000056758	2432.59	4250.76	614.431	0.144546	-2.7904	1.95018e-12	3.3783e-10
Hmgcl	15356	ENSMUSG00000028672	365.656	508.2	223.112	0.439023	-1.18763	0.00540757	0.0455398
Hmgn5	50887	ENSMUSG00000031245	1066.2	491.764	1640.65	3.33625	1.73823	0.000272979	0.0049054
Hmha1	70719	ENSMUSG00000035697	3770.91	6301.01	1240.81	0.196921	-2.34431	5.19067e-08	3.41894e-06
Hnf4a	15378	ENSMUSG00000017950	11.8742	0.243843	23.5046	96.3926	6.59085	0.00361553	0.0338663
Hnrnpd	11991	ENSMUSG00000000568	4060.77	2633.37	5488.16	2.08409	1.05942	0.00487628	0.0421096
Hnrnpdl	50926	ENSMUSG00000029328	2990.14	1905.15	4075.12	2.139	1.09694	0.00338825	0.0323922
Homer3	26558	ENSMUSG00000003573	273.649	433.995	113.302	0.261068	-1.9375	1.96014e-05	0.000566869
Hp	15439	ENSMUSG00000031722	124.01	5.01081	243.01	48.4971	5.59983	0.00289079	0.0288131
Hpcal1	53602	ENSMUSG00000071379	1747.22	2276.69	1217.75	0.534875	-0.902725	0.0140993	0.0869808
Hpgds	54486	ENSMUSG00000029919	4422.81	6275.93	2569.69	0.409452	-1.28823	0.00833793	0.0615415
Hps1	192236	ENSMUSG00000025188	489.652	689.778	289.526	0.419739	-1.25244	0.00291899	0.0289941
Hps6	20170	ENSMUSG00000074811	142.645	208.075	77.2156	0.371095	-1.43014	0.00511812	0.0435896
Hpse	15442	ENSMUSG00000035273	2041.3	3183.97	898.63	0.282236	-1.82503	3.4622e-06	0.000131238
Hr	15460	ENSMUSG00000022096	21.321	5.12461	37.5173	7.32102	2.87204	0.013806	0.0859368
Hs1bp3	58240	ENSMUSG00000020605	498.789	753.006	244.573	0.324796	-1.62239	8.27386e-05	0.00187112
Hs6st1	50785	ENSMUSG00000045216	753.055	1170.91	335.195	0.286267	-1.80457	8.66973e-06	0.000289375
Hsd17b11	114664	ENSMUSG00000029311	1701.62	2232.2	1171.03	0.52461	-0.930683	0.0158812	0.0938621
Hsd17b12	56348	ENSMUSG00000027195	2476.54	1670.81	3282.26	1.96447	0.974141	0.0134915	0.0846678
Hsd17b3	15487	ENSMUSG00000033122	6.97989	0	13.9598	NaN	NaN	0.0118909	0.0787607
Hsd3b7	101502	ENSMUSG00000042289	882.407	1328.93	435.885	0.327997	-1.60824	3.6091e-05	0.000951604
Hsdl1	72552	ENSMUSG00000034189	572.199	803.027	341.371	0.425105	-1.23411	0.00229331	0.0243127
Hspa8	15481	ENSMUSG00000015656	84250.8	56753.3	111748	1.96902	0.977477	0.0107317	0.0731335
Hspbp1	66245	ENSMUSG00000063802	365.869	542.297	189.441	0.349331	-1.51733	0.000530218	0.00810663
Htra1	56213	ENSMUSG00000006205	241.129	121.416	360.843	2.97196	1.57141	0.00152505	0.0178563
Htra2	64704	ENSMUSG00000068329	252.366	385.749	118.984	0.308449	-1.6969	0.000328388	0.00566037
Hunk	26559	ENSMUSG00000053414	11.7597	1.33966	22.1798	16.5563	4.04931	0.0122712	0.0801512
Hyal1	15586	ENSMUSG00000010051	303.435	497.138	109.731	0.220725	-2.17967	1.77993e-06	7.2721e-05
Hyal2	15587	ENSMUSG00000010047	271.204	401.861	140.546	0.349739	-1.51565	0.000602023	0.00895949
Hyi	68180	ENSMUSG00000006395	151.752	224.114	79.3903	0.354241	-1.4972	0.00419085	0.0375378
Ica1	15893	ENSMUSG00000062995	101.786	155.82	47.7516	0.306452	-1.70626	0.00442093	0.0390136
Icam1	15894	ENSMUSG00000037405	4186.62	1042.52	7330.72	7.03173	2.81388	0.00813954	0.0605155
Icmt	57295	ENSMUSG00000039662	291.028	411.35	170.706	0.41499	-1.26885	0.00327865	0.0315806
Id3	15903	ENSMUSG00000007872	817.931	1232.12	403.744	0.327683	-1.60963	0.000273606	0.00491158
Idh1	15926	ENSMUSG00000025950	5400.13	7822.33	2977.93	0.380695	-1.39329	0.0131136	0.0832514
Idh2	269951	ENSMUSG00000030541	925.076	1417.33	432.826	0.305382	-1.71131	1.66983e-05	0.000498734
Ier3	15937	ENSMUSG00000003541	455.091	80.9839	829.198	10.2391	3.35601	0.00298665	0.0294299
Ier5l	72500	ENSMUSG00000089762	82.0864	156.832	7.3407	0.0468061	-4.41716	2.22554e-08	1.5931e-06
Iffo1	320678	ENSMUSG00000038271	291.58	430.994	152.167	0.353061	-1.50201	0.000760418	0.0106575
Ifi204	15951	ENSMUSG00000073489	4274.03	1703.41	6844.66	4.0182	2.00655	0.00427388	0.0380064
Ifi30	65972	ENSMUSG00000031838	729.065	1067.75	390.376	0.365605	-1.45164	0.00201518	0.0220664
Ifih1	71586	ENSMUSG00000026896	2587.73	1352.09	3823.37	2.82774	1.49965	4.15165e-05	0.00105763
Ifit1bl2	112419	ENSMUSG00000067297	55.3604	17.9035	92.8172	5.18431	2.37415	0.000732854	0.0103974
Ifitm7	74482	ENSMUSG00000065968	32.1565	0.425989	63.887	149.973	7.22856	0.000331779	0.00568487
Ifnar2	15976	ENSMUSG00000022971	3295.8	2198.39	4393.22	1.99838	0.998834	0.0113339	0.0761243
Ifrd1	15982	ENSMUSG00000001627	846.013	348.622	1343.4	3.85347	1.94616	2.57963e-05	0.000707071
Ift122	81896	ENSMUSG00000030323	174.022	247.765	100.28	0.404737	-1.30494	0.0083497	0.0615867
Ift140	106633	ENSMUSG00000024169	312.754	455.34	170.168	0.373717	-1.41998	0.00138795	0.01672
Ift172	67661	ENSMUSG00000038564	368.897	549.603	188.192	0.342414	-1.54619	0.000354729	0.00596765
Ift27	67042	ENSMUSG00000016637	76.515	114.765	38.2648	0.333418	-1.58459	0.0132872	0.0838828
Igf2bp1	140486	ENSMUSG00000013415	47.1705	4.65317	89.6879	19.2746	4.26863	0.00308997	0.0301224
Igf2bp2	319765	ENSMUSG00000033581	3451.97	927.19	5976.74	6.44608	2.68842	3.81071e-07	1.94728e-05
Igfbp4	16010	ENSMUSG00000017493	778.953	1374	183.908	0.133849	-2.90132	1.81173e-05	0.000531043
Igfbp5	16011	ENSMUSG00000026185	13.1758	0.487685	25.8639	53.0339	5.72884	0.0133838	0.0842469
Igfbp7	29817	ENSMUSG00000036256	98.7678	5.08896	192.447	37.8165	5.24094	1.17413e-05	0.000369809
Igfbpl1	75426	ENSMUSG00000035551	8.65649	0.243843	17.0691	70.0006	6.1293	0.0115758	0.0772888
Igsf10	242050	ENSMUSG00000036334	15.9195	0.757578	31.0815	41.0275	5.35852	0.00984729	0.0687564
Igsf6	80719	ENSMUSG00000035004	11233.1	3752.4	18713.8	4.98717	2.31822	3.87888e-10	4.42064e-08
Iigp1	60440	ENSMUSG00000054072	48.0625	16.8406	79.2844	4.70793	2.23509	0.00984531	0.0687564
Ikbke	56489	ENSMUSG00000042349	2182.64	1367.47	2997.82	2.19223	1.1324	0.0014156	0.016994
Il11ra1	16157	ENSMUSG00000073889	177.802	262.581	93.0227	0.354262	-1.49711	0.00215699	0.0230509
Il12a	16159	ENSMUSG00000027776	16.7852	0.487685	33.0828	67.8363	6.08399	0.00913815	0.0656031
Il12b	16160	ENSMUSG00000004296	860.859	7.70953	1714.01	222.323	7.79652	0.0140041	0.0867334
Il13ra1	16164	ENSMUSG00000017057	957.37	211.516	1703.22	8.05246	3.00943	6.13457e-11	8.78257e-09
Il16	16170	ENSMUSG00000001741	239.153	334.532	143.775	0.429778	-1.21834	0.00804947	0.0600521
Il17ra	16172	ENSMUSG00000002897	2012.27	882.631	3141.91	3.55971	1.83176	0.0113376	0.0761243
Il17rd	171463	ENSMUSG00000040717	63.0178	16.9536	109.082	6.43415	2.68575	0.00391274	0.0357115
Il18	16173	ENSMUSG00000039217	262.905	147.964	377.845	2.55362	1.35254	0.003595	0.033754
Il19	329244	ENSMUSG00000016524	211.261	1.09582	421.427	384.577	8.58713	0.00953998	0.06736
Il1a	16175	ENSMUSG00000027399	23003.6	110.218	45897	416.421	8.7019	2.17494e-24	2.69118e-21
Il1b	16176	ENSMUSG00000027398	221722	1076.71	442368	410.853	8.68248	1.41803e-22	1.44497e-19
Il1f5	54450	ENSMUSG00000026983	7.73891	0	15.4778	NaN	NaN	0.00722505	0.0557007
Il1f9	215257	ENSMUSG00000044103	348.114	104.007	592.222	5.69404	2.50945	0.0131037	0.08324
Il1rl2	107527	ENSMUSG00000070942	57.8092	14.3689	101.25	7.04644	2.81689	0.000311068	0.00542044
Il20rb	213208	ENSMUSG00000044244	106.69	29.0178	184.362	6.35339	2.66753	7.16023e-06	0.000244648
Il23a	83430	ENSMUSG00000025383	17.453	0.695881	34.2101	49.1608	5.61944	0.000179739	0.00354627
Il27	246779	ENSMUSG00000044701	27.8247	6.27547	49.374	7.86778	2.97596	0.00403612	0.0363776
Il3ra	16188	ENSMUSG00000068758	124.025	184.114	63.9355	0.34726	-1.52591	0.0057813	0.0476675
Il6	16193	ENSMUSG00000025746	2023.45	10.7369	4036.16	375.915	8.55426	9.66925e-07	4.30421e-05
Il6ra	16194	ENSMUSG00000027947	630.042	881.721	378.364	0.42912	-1.22055	0.0134834	0.0846678
Il6st	16195	ENSMUSG00000021756	3093.29	4475.08	1711.49	0.38245	-1.38666	0.000499979	0.00778179
Ilvbl	216136	ENSMUSG00000032763	369.477	535.464	203.49	0.380026	-1.39583	0.00110208	0.0141118
Imp3	102462	ENSMUSG00000032288	185.091	257.941	112.24	0.435138	-1.20046	0.0135707	0.0850098
Impa2	114663	ENSMUSG00000024525	75.387	126.04	24.7343	0.196242	-2.3493	0.000383072	0.00635628
Inafm1	66300	ENSMUSG00000091811	52.7751	81.5809	23.9693	0.293811	-1.76704	0.0127743	0.081989
Inf2	70435	ENSMUSG00000037679	1445.07	2322.62	567.517	0.244344	-2.03302	1.44038e-07	8.22316e-06
Ing4	28019	ENSMUSG00000030330	357.971	508.718	207.224	0.407346	-1.29567	0.00274754	0.0277523
Inhba	16323	ENSMUSG00000041324	188.892	3.82724	373.957	97.7092	6.61042	0.000497933	0.0077639
Ino80	68142	ENSMUSG00000034154	2634.95	1701.2	3568.7	2.09776	1.06885	0.00400501	0.0362291
Ino80b	70020	ENSMUSG00000030034	93.046	156.106	29.986	0.192087	-2.38017	7.59671e-05	0.00173866
Inpp1	16329	ENSMUSG00000026102	120.218	189.225	51.2103	0.270632	-1.8856	0.000645275	0.00942503
Inpp5b	16330	ENSMUSG00000028894	1849.59	1022.29	2676.89	2.61853	1.38876	0.000311697	0.00542044
Inpp5d	16331	ENSMUSG00000026288	4765.3	7045.22	2485.38	0.352776	-1.50318	3.27451e-05	0.000874026
Inppl1	16332	ENSMUSG00000032737	3832.78	6084.87	1580.69	0.259774	-1.94467	2.93634e-07	1.53212e-05
Ints1	68510	ENSMUSG00000029547	862.365	1153.7	571.031	0.494957	-1.01462	0.00889512	0.0642846
Ints5	109077	ENSMUSG00000071652	231.71	332.126	131.293	0.395312	-1.33893	0.00431647	0.0382673
Ip6k1	27399	ENSMUSG00000032594	1008.99	1501.41	516.576	0.34406	-1.53927	8.87727e-05	0.00197408
Iqca	74918	ENSMUSG00000026301	12.5352	0	25.0704	NaN	NaN	0.0112669	0.075826
Iqce	74239	ENSMUSG00000036555	295.108	408.209	182.008	0.44587	-1.16531	0.00890776	0.0643491
Irak2	108960	ENSMUSG00000060477	1677.91	848.916	2506.9	2.95306	1.56221	2.81881e-05	0.000759445
Irak3	73914	ENSMUSG00000020227	4522.72	670.617	8374.82	12.4882	3.6425	6.77328e-12	1.09657e-09
Irf2bp1	272359	ENSMUSG00000044030	173.336	285.637	61.0347	0.213679	-2.22648	1.09469e-05	0.000349233
Irf2bp2	270110	ENSMUSG00000051495	2933.69	4086.97	1780.42	0.435632	-1.19882	0.00107668	0.0138362
Irf3	54131	ENSMUSG00000003184	361.895	486.971	236.818	0.486308	-1.04006	0.0141092	0.0870111
Irf5	27056	ENSMUSG00000029771	2527.28	3844	1210.57	0.314925	-1.66692	1.20321e-05	0.000374879
Irf8	15900	ENSMUSG00000041515	1355.81	1957.14	754.473	0.385497	-1.37521	0.000269025	0.0048545
Isg15	100038882	ENSMUSG00000035692	796.895	255.522	1338.27	5.23738	2.38885	0.00908654	0.0653138
Isoc2a	664994	ENSMUSG00000086784	215.599	332.77	98.4285	0.295786	-1.75738	0.000186859	0.00365345
Itga4	16401	ENSMUSG00000027009	9437.55	5834.86	13040.2	2.23488	1.1602	0.000939411	0.0125492
Itga6	16403	ENSMUSG00000027111	3887.29	6634.74	1139.85	0.1718	-2.54119	7.23305e-05	0.00167116
Itgal	16408	ENSMUSG00000030830	3792.6	1498.31	6086.89	4.0625	2.02237	0.000209948	0.00401426
Itgb3	16416	ENSMUSG00000020689	156.644	233.953	79.335	0.339107	-1.56019	0.00210214	0.0226042
Itgb5	16419	ENSMUSG00000022817	2453.62	4346.73	560.502	0.128948	-2.95514	2.98841e-14	7.96434e-12
Itgb8	320910	ENSMUSG00000025321	543.28	6.23023	1080.33	173.401	7.43797	0.00244081	0.0253187
Itih4	16427	ENSMUSG00000021922	12.4921	1.9478	23.0363	11.8269	3.564	0.0139069	0.086373
Itih5	209378	ENSMUSG00000025780	16.3275	0.939724	31.7152	33.7495	5.07679	0.00171524	0.0195096
Itm2c	64294	ENSMUSG00000026223	1330.68	1977.15	684.203	0.346055	-1.53093	7.23529e-05	0.00167116
Itpr3	16440	ENSMUSG00000042644	1845.92	2713.09	978.752	0.360751	-1.47092	0.00706395	0.0548002
Itpripl1	73338	ENSMUSG00000074825	432.421	609.168	255.674	0.419711	-1.25253	0.00222437	0.0236833
Itsn1	16443	ENSMUSG00000022957	4442.35	3084.03	5800.66	1.88087	0.911399	0.0134697	0.0846337
Ivd	56357	ENSMUSG00000027332	429.183	617.057	241.309	0.391065	-1.35452	0.00194618	0.0214873
Ivns1abp	117198	ENSMUSG00000023150	1388.19	1997.79	778.599	0.389731	-1.35945	0.000590905	0.00881676
Jak2	16452	ENSMUSG00000024789	12330.7	1224.16	23437.3	19.1456	4.25894	7.49012e-11	1.02977e-08
Jmjd6	107817	ENSMUSG00000056962	1409.77	692.691	2126.84	3.0704	1.61843	8.71651e-05	0.00194583
Jmjd8	72106	ENSMUSG00000025736	434.489	597.719	271.258	0.453822	-1.1398	0.00671546	0.0531196
Jmy	57748	ENSMUSG00000021690	537.151	720.897	353.404	0.490229	-1.02847	0.0152506	0.0914194
Josd1	10004377174158	ENSMUSG00000022426	415.915	558.628	273.203	0.48906	-1.03192	0.0119354	0.078833
Josd2	66124	ENSMUSG00000038695	225.828	377.414	74.2419	0.196712	-2.34584	6.84092e-07	3.17709e-05
Kank2	235041	ENSMUSG00000032194	492.928	779.1	206.756	0.265378	-1.91388	4.86862e-06	0.000176073
Kat2a	14534	ENSMUSG00000020918	442.239	609.795	274.683	0.450451	-1.15056	0.00887495	0.0642846
Kbtbd8	243574	ENSMUSG00000030031	96.0258	54.2045	137.847	2.54309	1.34658	0.0170314	0.0978786
Kcna3	16491	ENSMUSG00000047959	101.449	40.3563	162.542	4.02767	2.00994	0.000752123	0.0105866
Kcnab2	16498	ENSMUSG00000028931	1201.72	1812.04	591.39	0.326367	-1.61543	2.68952e-05	0.00073371
Kcnf1	382571	ENSMUSG00000051726	11.8308	0.243843	23.4178	96.0366	6.58551	0.00551603	0.0461596
Kcng3	225030	ENSMUSG00000045053	28.2789	1.88904	54.6688	28.9399	4.85499	2.62561e-05	0.000718539
Kcng4	66733	ENSMUSG00000045246	9.03716	0	18.0743	NaN	NaN	0.00416206	0.0372992
Kcnj2	16518	ENSMUSG00000041695	1184.66	1749.81	619.506	0.354042	-1.49801	0.000240284	0.00445658
Kcnk2	16526	ENSMUSG00000037624	9.21869	0.425989	18.0114	42.2814	5.40195	0.0115975	0.0773894
Kcnk6	52150	ENSMUSG00000046410	918.948	1213.2	624.695	0.514915	-0.957595	0.0133782	0.0842469
Kcnn3	140493	ENSMUSG00000000794	16.9074	0.851977	32.9628	38.6898	5.27388	0.000890744	0.0120268
Kcns3	238076	ENSMUSG00000043673	6.37773	0	12.7555	NaN	NaN	0.0175401	0.0997857
Kcnt1	227632	ENSMUSG00000058740	15.4713	1.42741	29.5151	20.6774	4.36998	0.0034353	0.0327336
Kctd13	233877	ENSMUSG00000030685	155.413	239.365	71.4607	0.298542	-1.74399	0.000380829	0.00632618
Kctd2	70382	ENSMUSG00000016940	222.853	337.301	108.405	0.321388	-1.63761	0.00050363	0.00781055
Kctd9	105440	ENSMUSG00000034327	491.357	309.894	672.819	2.17113	1.11844	0.00809238	0.0602943
Kdelr1	68137	ENSMUSG00000002778	1257.16	1900.23	614.093	0.323167	-1.62965	2.2697e-05	0.00063828
Kdm2b	30841	ENSMUSG00000029475	656.614	927.975	385.253	0.415155	-1.26828	0.00140237	0.0168586
Kdm4b	193796	ENSMUSG00000024201	815.85	547.027	1084.67	1.98285	0.987577	0.0121506	0.0795481
Kdm5b	75605	ENSMUSG00000042207	1888.51	963.386	2813.64	2.92057	1.54625	6.16248e-05	0.00147245
Kdm6b	216850	ENSMUSG00000018476	837.054	152.842	1521.27	9.95319	3.31516	6.76896e-15	2.05717e-12
Kdm7a	338523	ENSMUSG00000042599	4375.33	2695.18	6055.48	2.24678	1.16786	0.00246219	0.0254946
Kdr	16542	ENSMUSG00000062960	291.507	495.247	87.7667	0.177218	-2.4964	0.00366754	0.0340806
Kdsr	70750	ENSMUSG00000009905	256.232	400.592	111.872	0.279267	-1.84028	9.20263e-05	0.00204119
Khk	16548	ENSMUSG00000029162	110.194	175.652	44.7351	0.25468	-1.97324	0.000646117	0.00942939
Kif13b	16554	ENSMUSG00000060012	2062.66	3230.95	894.378	0.276816	-1.853	1.52735e-06	6.32972e-05
Kif1a	16560	ENSMUSG00000014602	64.0741	6.20397	121.944	19.6558	4.29689	0.00105865	0.0136757
Kif21b	16565	ENSMUSG00000041642	1327.35	1788	866.697	0.484729	-1.04475	0.0039909	0.0361581
Kif2a	16563	ENSMUSG00000021693	2086.83	1362.89	2810.78	2.06238	1.04431	0.0163943	0.0956548
Kif3c	16570	ENSMUSG00000020668	723.401	481.271	965.532	2.00621	1.00447	0.0140382	0.0868201
Kif5b	16573	ENSMUSG00000006740	9899.42	6719.35	13079.5	1.94654	0.960913	0.00983186	0.0687041
Kifc3	16582	ENSMUSG00000031788	483.367	805.393	161.34	0.200324	-2.31959	6.99621e-08	4.42319e-06
Kitl	17311	ENSMUSG00000019966	636.914	1164.65	109.183	0.0937476	-3.41507	6.05916e-15	1.87434e-12
Klc4	74764	ENSMUSG00000003546	258.596	459.271	57.9205	0.126114	-2.9872	4.78882e-07	2.38381e-05
Klf11	194655	ENSMUSG00000020653	110.636	163.42	57.8513	0.354003	-1.49817	0.00841079	0.0619049
Klf13	50794	ENSMUSG00000052040	1560.98	2129.49	992.477	0.466064	-1.1014	0.00290478	0.0289193
Klf16	118445	ENSMUSG00000035397	82.9512	121.685	44.2172	0.363374	-1.46047	0.0156513	0.0929472
Klf17	75753	ENSMUSG00000048626	18.3457	0.731528	35.9599	49.1572	5.61933	0.0128621	0.082309
Klhdc7a	242721	ENSMUSG00000078234	13.5865	1.24526	25.9277	20.8211	4.37997	0.0084369	0.0620341
Klhl17	231003	ENSMUSG00000078484	192.906	300.245	85.5661	0.284987	-1.81103	0.00019965	0.00386861
Klhl21	242785	ENSMUSG00000073700	208.392	319.094	97.6903	0.306149	-1.7077	0.000363815	0.00608924
Klhl25	207952	ENSMUSG00000055652	221.99	309.324	134.657	0.435325	-1.19984	0.0105627	0.0722093
Klhl36	234796	ENSMUSG00000031828	133.137	192.028	74.2463	0.386644	-1.37092	0.00848481	0.0623599
Klhl40	72330	ENSMUSG00000074001	7.966	0	15.932	NaN	NaN	0.0133038	0.0839264
Klhl6	239743	ENSMUSG00000043008	451.72	734.637	168.802	0.229776	-2.1217	1.87608e-05	0.000547127
Klk9	101533	ENSMUSG00000047884	6.40937	0	12.8187	NaN	NaN	0.0156892	0.093045
Klra2	16633	ENSMUSG00000030187	330.249	76.5465	583.952	7.62872	2.93144	7.49559e-05	0.0017221
Kpna3	16648	ENSMUSG00000021929	5413.54	2363.54	8463.53	3.58087	1.84031	9.78208e-07	4.33389e-05
Krcc1	57896	ENSMUSG00000053012	3711.94	2549.75	4874.12	1.9116	0.934783	0.0126507	0.0814679
Kri1	215194	ENSMUSG00000035047	1532.54	1010.83	2054.24	2.03222	1.02306	0.00822197	0.0608932
Krit1	79264	ENSMUSG00000000600	1382.02	877.901	1886.13	2.14846	1.1033	0.00305338	0.0298793
Krt75	109052	ENSMUSG00000022986	10.2839	0.243843	20.324	83.3487	6.38109	0.00464253	0.0406379
Ksr1	16706	ENSMUSG00000018334	147.157	79.3318	214.982	2.70991	1.43825	0.00567731	0.0470128
Ktn1	16709	ENSMUSG00000021843	2599.4	1386.13	3812.68	2.7506	1.45975	9.56057e-05	0.0021071
Kxd1	75620	ENSMUSG00000055553	411.18	551.708	270.651	0.49057	-1.02747	0.0139294	0.0863942
L3mbtl3	237339	ENSMUSG00000039089	253.558	362.808	144.308	0.397753	-1.33005	0.00434416	0.038434
Lacc1	210808	ENSMUSG00000044350	2458.53	983.668	3933.39	3.99869	1.99953	0.000211718	0.00403681
Lad1	16763	ENSMUSG00000041782	202.45	8.30492	396.596	47.7543	5.57756	4.2957e-06	0.000158666
Lama1	16772	ENSMUSG00000032796	30.2074	4.89036	55.5245	11.3539	3.50511	0.00580471	0.0478378
Lama2	16773	ENSMUSG00000019899	32.6959	3.91499	61.4769	15.7029	3.97296	0.00412895	0.037137
Lama3	16774	ENSMUSG00000024421	281.367	451.821	110.914	0.245481	-2.02631	0.00254011	0.0260832
Lamb1	16777	ENSMUSG00000002900	19.677	5.03686	34.3171	6.81319	2.76833	0.0143078	0.0878604
Lamtor1	66508	ENSMUSG00000030842	1085.96	1624.51	547.416	0.336973	-1.56929	4.76493e-05	0.00119109
Lamtor4	66096	ENSMUSG00000050552	522.914	743.405	302.424	0.406809	-1.29758	0.0013925	0.0167632
Laptm5	16792	ENSMUSG00000028581	15614.2	20547.2	10681.2	0.519839	-0.943864	0.0108985	0.0740664
Larp1	73158	ENSMUSG00000037331	6748.8	4202.69	9294.91	2.21166	1.14513	0.00194965	0.0215119
Lars2	102436	ENSMUSG00000035202	71589	105296	37881.6	0.359761	-1.47489	0.00135606	0.0164734
Lasp1	16796	ENSMUSG00000038366	4071.45	5298.87	2844.04	0.536725	-0.897744	0.0144279	0.0883024
Lat2	56743	ENSMUSG00000040751	3557.97	5486.7	1629.24	0.296943	-1.75174	3.98262e-06	0.000148368
Lbh	77889	ENSMUSG00000024063	122.33	213.321	31.3395	0.146913	-2.76697	9.55708e-07	4.26694e-05
Lcn2	16819	ENSMUSG00000026822	2035.97	13.2795	4058.67	305.634	8.25566	4.81753e-06	0.00017459
Lcp1	18826	ENSMUSG00000021998	69067.5	40524.5	97610.4	2.40867	1.26824	0.000576796	0.00866595
Lcp2	16822	ENSMUSG00000002699	5321.04	1024.55	9617.53	9.38707	3.23068	3.564e-16	1.40316e-13
Ldb1	16825	ENSMUSG00000025223	672.694	925.043	420.346	0.454407	-1.13794	0.0047417	0.0412352
Ldlrap1	100017	ENSMUSG00000037295	792.229	1273.74	310.715	0.243939	-2.03541	2.74916e-07	1.45559e-05
Letmd1	68614	ENSMUSG00000037353	367.682	518.703	216.661	0.417698	-1.25947	0.00337898	0.0323392
Lfng	16848	ENSMUSG00000029570	1105.99	1746.99	464.993	0.266169	-1.90959	3.7191e-06	0.000140057
Lgr6	329252	ENSMUSG00000042793	10.6598	0.425989	20.8937	49.0475	5.61611	0.00373208	0.0344989
Lhpp	76429	ENSMUSG00000030946	105.142	153.084	57.2	0.373651	-1.42024	0.0153593	0.0918431
Lif	16878	ENSMUSG00000034394	15.3004	1.8111	28.7896	15.8962	3.99061	0.00794966	0.0595125
Lifr	16880	ENSMUSG00000054263	382.336	544.745	219.927	0.403724	-1.30856	0.00269705	0.0274023
Lilr4b	14727	ENSMUSG00000089672	10603.5	6465.4	14741.6	2.28008	1.18908	0.000765071	0.0106968
Lilrb4a	14728	ENSMUSG00000062593	16056.9	9403.24	22710.5	2.41518	1.27213	0.00029899	0.00525828
Limk1	16885	ENSMUSG00000029674	228.534	331.129	125.94	0.380334	-1.39466	0.00299018	0.0294479
Lipa	16889	ENSMUSG00000024781	15677	24604.7	6749.22	0.274305	-1.86614	0.000666482	0.00966957
Lipg	16891	ENSMUSG00000053846	66.8708	7.36504	126.377	17.159	4.10089	0.000188643	0.00368417
Lman2	66890	ENSMUSG00000021484	923.264	1304.66	541.865	0.41533	-1.26767	0.00107829	0.0138467
Lman2l	214895	ENSMUSG00000001143	394.904	580.941	208.867	0.359533	-1.4758	0.000540611	0.00821492
Lmf1	76483	ENSMUSG00000002279	136.16	199.902	72.4179	0.362266	-1.46488	0.00483119	0.0417618
Lmo2	16909	ENSMUSG00000032698	1901.44	2975.77	827.112	0.277949	-1.84711	1.97385e-05	0.000568934
Lnx1	16924	ENSMUSG00000029228	183.808	105.989	261.627	2.46843	1.30359	0.00713089	0.0552206
Lonrf3	74365	ENSMUSG00000016239	2083.29	3182.74	983.833	0.309116	-1.69378	6.98155e-06	0.000239014
Loxhd1	240411	ENSMUSG00000032818	18.7533	2.08764	35.419	16.966	4.08458	0.00358071	0.0337025
Lpar1	14745	ENSMUSG00000038668	146.992	21.3242	272.661	12.7864	3.67654	2.20274e-10	2.6684e-08
Lpar5	381810	ENSMUSG00000067714	225.295	434.855	15.7349	0.0361842	-4.78849	5.57179e-08	3.60149e-06
Lpar6	67168	ENSMUSG00000033446	913.323	1406.76	419.891	0.298482	-1.74428	8.87443e-06	0.000294123
Lpcat2	270084	ENSMUSG00000033192	1633.54	731.934	2535.15	3.46363	1.79228	3.49321e-06	0.000132124
Lpxn	107321	ENSMUSG00000024696	2447.28	4086.63	807.927	0.1977	-2.33862	8.28916e-08	5.18223e-06
Lrfn5	238205	ENSMUSG00000035653	10.7075	0	21.4151	NaN	NaN	0.0120519	0.0791417
Lrmp	16970	ENSMUSG00000030263	642.411	1043.72	241.1	0.231	-2.11403	6.19611e-07	2.93266e-05
Lrp1	16971	ENSMUSG00000040249	42047.4	62283.4	21811.5	0.350197	-1.51376	3.212e-05	0.000858665
Lrp10	65107	ENSMUSG00000022175	505.132	693.491	316.774	0.456782	-1.13042	0.00386942	0.0354117
Lrp2	14725	ENSMUSG00000027070	46.71	8.26262	85.1575	10.3063	3.36546	0.00786572	0.0589605
Lrp2bp	67620	ENSMUSG00000031637	35.0046	11.8883	58.1208	4.8889	2.28951	0.00857864	0.0627832
Lrp5	16973	ENSMUSG00000024913	598.002	960.03	235.975	0.2458	-2.02444	7.59779e-05	0.00173866
Lrrc20	216011	ENSMUSG00000037151	261.613	363.506	159.721	0.439389	-1.18643	0.00839708	0.0618464
Lrrc27	76612	ENSMUSG00000015980	596.876	859.364	334.388	0.389111	-1.36175	0.0116268	0.0774955
Lrrc41	230654	ENSMUSG00000028703	655.315	875.322	435.308	0.497312	-1.00778	0.0115544	0.0772506
Lrrc4c	241568	ENSMUSG00000050587	8.5392	0	17.0784	NaN	NaN	0.00433433	0.0383863
Lrrc63	70859	ENSMUSG00000021997	62.0631	5.71629	118.41	20.7145	4.37257	1.92699e-08	1.40257e-06
Lrrc8c	100604	ENSMUSG00000054720	688.321	445.258	931.383	2.09178	1.06473	0.00642477	0.0515032
Lrrc8d	231549	ENSMUSG00000046079	2025.69	1032.82	3018.55	2.92262	1.54726	0.00101192	0.0132398
Lrrk1	233328	ENSMUSG00000015133	701.309	1065.82	336.801	0.316003	-1.66199	6.44633e-05	0.00153182
Lsr	54135	ENSMUSG00000001247	167.28	251.762	82.798	0.328875	-1.60439	0.00188704	0.0209547
Ltbp3	16998	ENSMUSG00000024940	324.57	486.322	162.818	0.334795	-1.57865	0.000349318	0.00589214
Ltbr	17000	ENSMUSG00000030339	476.146	692.921	259.37	0.374314	-1.41768	0.000488512	0.00767111
Ltc4s	17001	ENSMUSG00000020377	34.5557	60.6394	8.47192	0.13971	-2.8395	0.00225599	0.0239611
Ly75	17076	ENSMUSG00000026980	161.139	17.2627	305.015	17.6691	4.14315	0.000982641	0.0129743
Ly9	17085	ENSMUSG00000004707	9374.11	6508.5	12239.7	1.88057	0.911172	0.0155405	0.0924884
Lyl1	17095	ENSMUSG00000034041	568.907	951.818	185.996	0.195411	-2.35542	4.56418e-06	0.000166805
Lyn	17096	ENSMUSG00000042228	8245.03	3496.56	12993.5	3.71608	1.89378	5.50098e-07	2.66211e-05
Lypla2	26394	ENSMUSG00000028670	297.237	409.062	185.412	0.453262	-1.14158	0.00952586	0.0672987
Lztr1	66863	ENSMUSG00000022761	596.802	803.066	390.538	0.486309	-1.04006	0.0095068	0.0672189
M1ap	110958	ENSMUSG00000030041	65.8754	103.405	28.346	0.274126	-1.86709	0.0059019	0.0485003
Macc1	238455	ENSMUSG00000041886	21.4743	0.487685	42.461	87.0664	6.44404	0.000629835	0.0092463
Mad2l1bp	66591	ENSMUSG00000034509	199.902	287.237	112.567	0.391895	-1.35146	0.00493916	0.04242
Maf1	68877	ENSMUSG00000022553	401.441	653.37	149.512	0.228831	-2.12764	9.94777e-07	4.39605e-05
Mafb	16658	ENSMUSG00000074622	1898.34	2562.22	1234.46	0.481792	-1.05352	0.00422867	0.0377792
Maff	17133	ENSMUSG00000042622	359.42	70.9958	647.845	9.12511	3.18984	2.29868e-07	1.23282e-05
Mageb16	71967	ENSMUSG00000046942	6.73068	0	13.4614	NaN	NaN	0.0137946	0.0858961
Maged1	94275	ENSMUSG00000025151	1272.97	1929.66	616.281	0.319373	-1.64669	2.44472e-05	0.000678683
Magohb	66441	ENSMUSG00000030188	80.0672	26.4453	133.689	5.05531	2.3378	0.000487172	0.00765815
Maml3	433586	ENSMUSG00000061143	157.989	220.946	95.0317	0.430113	-1.21721	0.0147119	0.0893794
Man1c1	230815	ENSMUSG00000037306	1532.95	2537.53	528.366	0.208221	-2.26381	1.87526e-06	7.60777e-05
Man2a2	140481	ENSMUSG00000038886	1567.21	2413.77	720.649	0.298558	-1.74392	3.1388e-05	0.000843
Man2b1	17159	ENSMUSG00000005142	6849.84	9440.7	4258.99	0.45113	-1.14838	0.00169116	0.0193158
Man2b2	17160	ENSMUSG00000029119	3361.17	4794.16	1928.19	0.402196	-1.31403	0.00179462	0.0201842
Man2c1	73744	ENSMUSG00000032295	581.403	806.014	356.792	0.442662	-1.17572	0.00423598	0.0378052
Manba	110173	ENSMUSG00000028164	674.092	1009.17	339.015	0.335935	-1.57375	0.000154768	0.0031458
Map1b	17755	ENSMUSG00000052727	33.9451	9.58527	58.3049	6.08276	2.60473	0.00959872	0.0675655
Map1s	270058	ENSMUSG00000019261	483.841	760.609	207.072	0.272245	-1.87702	1.02868e-05	0.000330803
Map2k1	26395	ENSMUSG00000004936	4066.8	2799.68	5333.92	1.90519	0.929935	0.0171347	0.0983191
Map2k5	23938	ENSMUSG00000058444	313.283	450.504	176.061	0.390809	-1.35546	0.00256217	0.026232
Map3k1	26401	ENSMUSG00000021754	1699.97	2378.73	1021.2	0.429306	-1.21992	0.00149871	0.0176733
Map3k11	26403	ENSMUSG00000004054	792.542	1134.99	450.091	0.396558	-1.3344	0.000722217	0.0102633
Map3k14	53859	ENSMUSG00000020941	507.804	710.881	304.727	0.428661	-1.22209	0.00316964	0.0307262
Map3k3	26406	ENSMUSG00000020700	1396.31	1952.1	840.516	0.43057	-1.21568	0.00145368	0.0173281
Map3k8	26410	ENSMUSG00000024235	617.904	336.755	899.053	2.66975	1.41671	0.000578657	0.00868637
Map3k9	338372	ENSMUSG00000042724	397.045	685.005	109.086	0.159248	-2.65065	1.58566e-09	1.5607e-07
Map4k4	26921	ENSMUSG00000026074	4414.53	2647.67	6181.39	2.33465	1.22321	0.00169262	0.0193158
Mapk6	50772	ENSMUSG00000042688	5462.41	3314.72	7610.09	2.29585	1.19903	0.00119713	0.0149483
Mapk8	26419	ENSMUSG00000021936	526.184	300.258	752.109	2.50488	1.32474	0.00114721	0.0144637
Mapkbp1	26390	ENSMUSG00000033902	789.865	331.267	1248.46	3.76875	1.91408	0.00382587	0.0351035
2017-03-01	72925	ENSMUSG00000036469	2549.27	566.872	4531.66	7.99415	2.99894	0.00901968	0.064914
2017-03-02	224703	ENSMUSG00000079557	570.874	790.924	350.824	0.443563	-1.17279	0.003959	0.0360009
2017-03-06	223455	ENSMUSG00000039100	1698.11	2236.95	1159.26	0.51823	-0.948335	0.00990296	0.0689783
2017-03-08	71779	ENSMUSG00000025702	1140.81	1551.03	730.584	0.471033	-1.0861	0.00415603	0.0372838
Marcks	17118	ENSMUSG00000069662	6350.32	3737.23	8963.41	2.39841	1.26208	0.000499562	0.00778179
Marco	17167	ENSMUSG00000026390	784.96	7.53698	1562.38	207.296	7.69555	3.33481e-05	0.000887386
Mast3	546071	ENSMUSG00000031833	577.931	899.392	256.471	0.28516	-1.81016	8.87989e-06	0.000294123
Matk	17179	ENSMUSG00000004933	179.539	303.045	56.0341	0.184904	-2.43515	0.00236344	0.0247982
Mbd3l2	234988	ENSMUSG00000047508	13.4423	0.425989	26.4585	62.1109	5.95677	0.00324546	0.0313035
Mblac2	72852	ENSMUSG00000051098	152.516	232.738	72.2943	0.310625	-1.68675	0.00129489	0.0159068
Mbp	17196	ENSMUSG00000041607	1353.17	2006.7	699.641	0.348653	-1.52014	0.000456681	0.00725122
Mccc2	78038	ENSMUSG00000021646	152.447	216.291	88.604	0.409652	-1.28753	0.0125905	0.0813218
Mcemp1	69189	ENSMUSG00000013974	15.4958	1.8534	29.1383	15.7216	3.97467	0.00550195	0.0460659
Mcoln1	94178	ENSMUSG00000004567	588.761	864.005	313.517	0.362865	-1.4625	0.00101134	0.0132398
Mcoln2	68279	ENSMUSG00000011008	2334.68	803.802	3865.55	4.80908	2.26576	0.00113706	0.0144197
Mcrs1	51812	ENSMUSG00000037570	225.939	320.117	131.761	0.411604	-1.28067	0.00628665	0.050842
Mcu	215999	ENSMUSG00000009647	370.613	502.194	239.032	0.475977	-1.07104	0.0128004	0.0820961
Mdn1	100019	ENSMUSG00000058006	3629.55	2330.93	4928.17	2.11425	1.08015	0.00384113	0.035221
Mdp1	67881	ENSMUSG00000002329	232.044	321.989	142.1	0.441319	-1.18011	0.0116249	0.0774955
Mea1	17256	ENSMUSG00000002768	715.991	959.531	472.451	0.492377	-1.02216	0.00785924	0.0589375
Mecom	14013	ENSMUSG00000027684	15.8638	1.09582	30.6317	27.9533	4.80494	0.00302792	0.0296846
Med16	216154	ENSMUSG00000013833	186.578	277.928	95.2273	0.342633	-1.54526	0.0018004	0.020193
Med21	108098	ENSMUSG00000030291	2094.92	802.467	3387.37	4.22119	2.07765	0.00106488	0.0137458
Med22	20933	ENSMUSG00000015776	927.401	1328.77	526.036	0.395883	-1.33685	0.00105812	0.0136757
Med24	23989	ENSMUSG00000017210	467.805	621.39	314.221	0.505675	-0.983718	0.0162895	0.095207
Med25	75613	ENSMUSG00000002968	347.991	489.863	206.119	0.420769	-1.2489	0.00378985	0.0348839
Mef2b	105980076	ENSMUSG00000002345	231.524	328.155	134.892	0.411062	-1.28257	0.00686849	0.0537727
Mef2c	17260	ENSMUSG00000005583	1386.15	2172.59	599.709	0.276034	-1.85708	0.00114583	0.0144568
Mef2d	17261	ENSMUSG00000001419	701.82	960.623	443.017	0.461176	-1.11661	0.00432316	0.038307
Mefv	54483	ENSMUSG00000022534	288.964	35.9404	541.988	15.0802	3.91458	1.97286e-15	6.32888e-13
Megf11	214058	ENSMUSG00000036466	334.509	201.43	467.589	2.32135	1.21497	0.0132395	0.0836426
Megf8	269878	ENSMUSG00000045039	388.708	557.351	220.066	0.394842	-1.34065	0.00144326	0.0172544
Mep1a	17287	ENSMUSG00000023914	8.06263	0.269892	15.8554	58.747	5.87644	0.0170501	0.0978983
Mertk	17289	ENSMUSG00000014361	826.067	1358.24	293.891	0.216376	-2.20839	0.00889225	0.0642846
Metrn	70083	ENSMUSG00000002274	71.4431	121.024	21.8624	0.180645	-2.46877	0.000211826	0.00403681
Metrnl	210029	ENSMUSG00000039208	1538.9	2386.02	691.784	0.289932	-1.78621	4.99528e-06	0.000180278
Mettl6	67011	ENSMUSG00000021891	964.132	597.919	1330.34	2.22496	1.15378	0.00300845	0.0295607
Mettl7a1	70152	ENSMUSG00000054619	198.271	342.099	54.4432	0.159145	-2.65159	1.58354e-07	8.96461e-06
Mettl9	59052	ENSMUSG00000030876	1314.58	910.47	1718.69	1.8877	0.916627	0.017497	0.09972
Mex3b	108797	ENSMUSG00000057706	49.9621	79.8572	20.0671	0.251287	-1.99259	0.00684275	0.0536852
Mfap1b	100034361	ENSMUSG00000048222	33.9738	56.5119	11.4356	0.202358	-2.30502	0.0101775	0.0703813
Mfge8	17304	ENSMUSG00000030605	925.412	1575.05	275.772	0.175088	-2.51385	0.000496574	0.00774969
Mfng	17305	ENSMUSG00000018169	109.745	166.883	52.6073	0.315234	-1.66551	0.00450672	0.0396696
Mfsd10	68294	ENSMUSG00000001082	288.553	424.492	152.614	0.359521	-1.47585	0.000875514	0.0118674
Mfsd11	69900	ENSMUSG00000020818	605.042	861.879	348.205	0.404007	-1.30755	0.00149074	0.0176034
Mfsd12	73822	ENSMUSG00000034854	525.559	956.726	94.3921	0.0986616	-3.34137	4.68123e-09	4.03447e-07
Mfsd3	69572	ENSMUSG00000019080	42.2517	70.5723	13.9311	0.197401	-2.3408	0.00401865	0.0362578
Mfsd5	106073	ENSMUSG00000045665	871.165	1192.88	549.453	0.460611	-1.11838	0.0160621	0.0942881
Mfsd6	98682	ENSMUSG00000041439	1261.38	2173.75	349.003	0.160553	-2.63888	4.5896e-11	6.62546e-09
Mfsd7a	243197	ENSMUSG00000029490	184.244	92.098	276.389	3.00103	1.58546	0.000989992	0.0130217
Mfsd7b	226844	ENSMUSG00000066595	2422.41	3646.34	1198.47	0.328677	-1.60526	0.00202913	0.0221498
Mgarp	67749	ENSMUSG00000037161	36.7416	4.75072	68.7326	14.4678	3.85478	0.000492791	0.0077147
Mgat1	17308	ENSMUSG00000020346	1392.38	1962.87	821.892	0.418719	-1.25595	0.000979073	0.0129371
Mgat4a	269181	ENSMUSG00000026110	1489.34	859.931	2118.74	2.46385	1.30092	0.000854745	0.0116589
Mgat4b	103534	ENSMUSG00000036620	1038.48	1369.25	707.708	0.51686	-0.952154	0.0119051	0.0787749
Mgat5	107895	ENSMUSG00000036155	775.618	1131.65	419.583	0.37077	-1.43141	0.000258208	0.00470836
Mgst3	66447	ENSMUSG00000026688	362.711	600.886	124.537	0.207255	-2.27052	5.36532e-07	2.61813e-05
Mib2	76580	ENSMUSG00000029060	442.389	709.661	175.117	0.246762	-2.01881	3.76658e-05	0.000983636
Mical1	171580	ENSMUSG00000019823	368	658.065	77.9346	0.11843	-3.07789	2.0201e-06	8.13819e-05
Micu3	78506	ENSMUSG00000039478	226.237	110.357	342.118	3.10011	1.63232	0.000439192	0.00703154
Mid1ip1	68041	ENSMUSG00000008035	641.758	964.011	319.504	0.331432	-1.59322	9.46288e-05	0.00209089
Midn	59090	ENSMUSG00000035621	1012.61	1315.25	709.967	0.539797	-0.889511	0.0173267	0.0989945
Miip	28010	ENSMUSG00000029022	141.08	203.591	78.5696	0.385919	-1.37363	0.0111823	0.0754329
Milr1	380732	ENSMUSG00000040528	1396.16	703.067	2089.26	2.97164	1.57126	5.86999e-05	0.00141821
Mink1	50932	ENSMUSG00000020827	1257.48	1668.97	845.997	0.506898	-0.980233	0.0129905	0.0828858
Mitf	17342	ENSMUSG00000035158	5331.62	3027.6	7635.64	2.52201	1.33457	0.000206767	0.00396659
Mkl1	223701	ENSMUSG00000042292	1273.45	2029.74	517.165	0.254794	-1.9726	5.02957e-07	2.48226e-05
Mknk2	17347	ENSMUSG00000020190	932.995	1654.27	211.717	0.127982	-2.96599	3.42815e-11	5.07571e-09
Mlec	109154	ENSMUSG00000048578	2440.62	3326.7	1554.55	0.467295	-1.0976	0.00340587	0.0325247
Mlf2	30853	ENSMUSG00000030120	1692.94	2370.27	1015.61	0.428477	-1.22271	0.00126349	0.0156023
Mlkl	74568	ENSMUSG00000012519	1186.51	403.427	1969.59	4.88215	2.28752	7.78603e-06	0.00026139
Mllt11	56772	ENSMUSG00000053192	408.061	199.049	617.073	3.10011	1.63232	0.00541503	0.0455501
Mlycd	56690	ENSMUSG00000074064	146.202	231.277	61.1267	0.264301	-1.91975	0.000259003	0.00471789
Mme	17380	ENSMUSG00000027820	11.424	0.513735	22.3343	43.4744	5.4421	0.0111171	0.0750918
Mmp10	17384	ENSMUSG00000047562	9.10258	0.487685	17.7175	36.3297	5.18308	0.0166147	0.0964206
Mmp1b	83996	ENSMUSG00000041620	9.9178	0.851977	18.9836	22.2819	4.4778	0.0114854	0.0769382
Mmp3	17392	ENSMUSG00000043613	21.993	1.09582	42.8902	39.1399	5.29057	0.00680154	0.053483
Mmp9	17395	ENSMUSG00000017737	892.429	20.6871	1764.17	85.2789	6.41412	6.33034e-14	1.54451e-11
Mnt	17428	ENSMUSG00000000282	774.384	1223.55	325.221	0.265802	-1.91158	1.5441e-05	0.000466
Mob1b	68473	ENSMUSG00000006262	1116.73	672.379	1561.08	2.32173	1.2152	0.00146686	0.0174283
Mob2	101513	ENSMUSG00000025147	196.577	280.663	112.491	0.400805	-1.31903	0.00749507	0.0570713
Mob3b	214944	ENSMUSG00000073910	406.228	227.444	585.013	2.57212	1.36296	0.00148432	0.0175875
Mocos	68591	ENSMUSG00000039616	1390.64	2359.35	421.918	0.178828	-2.48336	4.28737e-10	4.79162e-08
Mospd3	68929	ENSMUSG00000037221	246.259	424.83	67.6889	0.159332	-2.64989	5.04528e-08	3.36151e-06
Mpdu1	24070	ENSMUSG00000018761	204.543	316.836	92.2496	0.291158	-1.78012	0.000355172	0.00596765
Mphosph10	67973	ENSMUSG00000030521	2089.38	1150.43	3028.33	2.63234	1.39634	0.000285492	0.00508282
Mplkip	63305766308	ENSMUSG00000012429	746.173	455.837	1036.51	2.27386	1.18514	0.0114231	0.0766687
Mpnd	68047	ENSMUSG00000003199	594.197	786	402.394	0.511952	-0.965919	0.0175807	0.099945
Mppe1	225651	ENSMUSG00000062526	111.991	181.868	42.1132	0.231559	-2.11055	0.000257926	0.00470817
Mpst	246221	ENSMUSG00000071711	101.792	148.391	55.1928	0.371941	-1.42686	0.0125397	0.0811647
Mpzl2	14012	ENSMUSG00000032092	7.35449	0	14.709	NaN	NaN	0.00928304	0.0662315
Mr1	15064	ENSMUSG00000026471	114.506	175.569	53.4428	0.304398	-1.71597	0.00173686	0.0197038
Mri1	67873	ENSMUSG00000004996	117.57	187.195	47.9455	0.256126	-1.96507	0.000550702	0.00833899
Mroh1	223658	ENSMUSG00000022558	1728.4	2653.38	803.427	0.302794	-1.72359	0.000344722	0.00582672
Mrpl10	107732	ENSMUSG00000001445	379.033	505.585	252.48	0.499382	-1.00179	0.0135576	0.0850011
Mrpl12	56282	ENSMUSG00000039640	452.321	650.398	254.244	0.390905	-1.35511	0.00476101	0.0412994
Mrpl2	27398	ENSMUSG00000002767	450.36	604.335	296.385	0.490431	-1.02788	0.0133017	0.0839264
Mrpl28	68611	ENSMUSG00000024181	302.953	443.737	162.169	0.365461	-1.45221	0.000893216	0.0120345
Mrpl32	75398	ENSMUSG00000015672	1017.08	509.981	1524.18	2.98871	1.57952	0.00707332	0.0548483
Mrpl4	66163	ENSMUSG00000003299	218.461	342.607	94.3142	0.275283	-1.86101	0.000132236	0.00276993
Mrpl45	67036	ENSMUSG00000018882	1077.04	591.271	1562.81	2.64313	1.40225	0.000307757	0.00537427
Mrpl52	68836	ENSMUSG00000010406	606.309	202.717	1009.9	4.98184	2.31668	7.44917e-07	3.43197e-05
Mrps12	24030	ENSMUSG00000045948	123.645	178.352	68.9382	0.386528	-1.37135	0.0121486	0.0795481
Mrps22	64655	ENSMUSG00000032459	852.939	517.464	1188.41	2.29661	1.19951	0.0108626	0.0738612
Mrps24	64660	ENSMUSG00000020477	303.266	434.861	171.671	0.394774	-1.3409	0.00307407	0.0300181
Mrps33	10004132814548	ENSMUSG00000029918	1563.25	961.143	2165.36	2.2529	1.17178	0.0103726	0.0712751
Mrps6	121022	ENSMUSG00000039680	201.626	294.673	108.579	0.368474	-1.44036	0.00413373	0.0371414
Ms4a4b	60361	ENSMUSG00000056290	39.5199	12.5482	66.4916	5.2989	2.40569	0.0049932	0.0427357
Ms4a4c	64380	ENSMUSG00000024675	445.062	92.1215	798.003	8.66251	3.11479	0.000568089	0.00854996
Ms4a4d	66607	ENSMUSG00000024678	28.4539	5.13441	51.7734	10.0836	3.33394	0.00113886	0.014432
Ms4a6c	73656	ENSMUSG00000079419	5691.45	1623.77	9759.13	6.01016	2.5874	8.06639e-12	1.29383e-09
Msantd2	235184	ENSMUSG00000042138	296.671	158.469	434.872	2.7442	1.45639	0.00603433	0.0492846
Msh2	17685	ENSMUSG00000024151	336.901	550.384	123.418	0.22424	-2.15688	1.46194e-06	6.11721e-05
Msh3	17686	ENSMUSG00000014850	208.505	294.796	122.214	0.41457	-1.27031	0.00760484	0.0575781
Msl3	17692	ENSMUSG00000031358	1126.79	1540.46	713.126	0.462932	-1.11113	0.00345548	0.0328646
Msra	110265	ENSMUSG00000054733	543.866	784.652	303.079	0.38626	-1.37236	0.0011187	0.0142389
Msrb2	76467	ENSMUSG00000023094	95.6169	163.143	28.0905	0.172183	-2.53798	0.000124897	0.00264497
Mt2	17750	ENSMUSG00000031762	534.678	58.0028	1011.35	17.4363	4.12402	7.53221e-09	6.09722e-07
Mtdh	67154	ENSMUSG00000022255	10776.2	3144.63	18407.8	5.85373	2.54936	2.82107e-11	4.24952e-09
Mtfr1l	76824	ENSMUSG00000046671	730.232	989.568	470.896	0.47586	-1.07139	0.00494919	0.042485
Mthfd1	108156	ENSMUSG00000021048	387.129	535.426	238.833	0.446061	-1.16469	0.00648916	0.0517073
Mthfd1l	270685	ENSMUSG00000040675	838.187	362.708	1313.67	3.62183	1.85672	0.00012737	0.00268422
Mthfd2l	665563	ENSMUSG00000029376	83.2991	39.0773	127.521	3.2633	1.70633	0.00672534	0.0531735
Mtm1	17772	ENSMUSG00000031337	1057.96	638.27	1477.65	2.31508	1.21106	0.00153972	0.0179613
Mtmr10	233315	ENSMUSG00000030522	1450.99	2260.49	641.492	0.283785	-1.81713	2.14231e-06	8.53131e-05
Mtmr11	194126	ENSMUSG00000045934	214.633	323.562	105.705	0.326692	-1.614	0.000754734	0.0105971
Mtmr3	74302	ENSMUSG00000034354	1451.07	1949.78	952.347	0.488437	-1.03375	0.0052001	0.044028
Mtpn	14489	ENSMUSG00000029840	19789	12187	27391	2.24756	1.16836	0.00163286	0.0188457
Mtr	238505	ENSMUSG00000021311	555.982	787.851	324.113	0.411388	-1.28143	0.0020746	0.0224474
Mtss1	211401	ENSMUSG00000022353	2202.97	3808.81	597.123	0.156774	-2.67324	1.48558e-11	2.31844e-09
Mtus1	102103	ENSMUSG00000045636	540.677	720.729	360.625	0.500362	-0.998957	0.0126793	0.081504
Muc5ac	17833	ENSMUSG00000037974	21.2872	2.43548	40.139	16.4809	4.04273	0.0150004	0.0903832
Mvb12a	73711	ENSMUSG00000031813	265.01	389.037	140.983	0.362391	-1.46438	0.00142051	0.0170412
Mvb12b	72543	ENSMUSG00000038740	659.434	967.853	351.014	0.362673	-1.46326	0.000205211	0.00395426
Mvk	17855	ENSMUSG00000041939	108.626	167.975	49.2759	0.293352	-1.76929	0.0016597	0.0190656
Mxd4	17122	ENSMUSG00000037235	124.711	234.118	15.3048	0.0653721	-3.93518	0.000111578	0.00240707
Myadm	50918	ENSMUSG00000068566	5445.52	2866.28	8024.76	2.79972	1.48528	0.00128685	0.0158212
Mybpc3	17868	ENSMUSG00000002100	48.923	19.4383	78.4077	4.03368	2.0121	0.00642036	0.0515032
Myd88	17874	ENSMUSG00000032508	2513.53	1309.96	3717.11	2.83757	1.50465	0.000202927	0.00392334
Myg1	60315	ENSMUSG00000001285	169.284	241.593	96.9743	0.401395	-1.31691	0.00768363	0.0579467
Myh11	17880	ENSMUSG00000018830	21.8715	2.76707	40.9759	14.8084	3.88834	0.014785	0.0896465
Myh6	17888	ENSMUSG00000040752	22.6505	3.89559	41.4055	10.6288	3.40991	0.00779351	0.0585205
Myh8	17885	ENSMUSG00000055775	18.5982	1.45346	35.7429	24.5916	4.6201	0.0105035	0.0719289
Myl6	17904	ENSMUSG00000090841	3120.88	4216.74	2025.03	0.480236	-1.05818	0.00425002	0.0378775
Mylk	107589	ENSMUSG00000022836	36.3166	7.35524	65.2781	8.87504	3.14975	0.000740932	0.0104691
Myo10	17909	ENSMUSG00000022272	5621.28	3651.3	7591.26	2.07906	1.05593	0.00353714	0.0334464
Myo18a	360013	ENSMUSG00000000631	1824.38	2463.51	1185.25	0.481122	-1.05553	0.00513627	0.0437011
Myo1f	17916	ENSMUSG00000024300	12411.8	18697.1	6126.52	0.327672	-1.60968	0.000332907	0.00569857
Myo3b	329421	ENSMUSG00000042064	23.3695	6.18478	40.5543	6.55712	2.71306	0.0102672	0.0707755
Myo5a	17918	ENSMUSG00000034593	11189	15669.3	6708.7	0.428143	-1.22384	0.00810783	0.0603575
Myt1	17932	ENSMUSG00000010505	20.4801	1.20962	39.7505	32.8621	5.03835	0.0154453	0.0921254
Mzt2	72083	ENSMUSG00000022671	67.8653	106.524	29.2071	0.274185	-1.86678	0.00488048	0.0421248
N4bp1	80750	ENSMUSG00000031652	2607.39	798.264	4416.51	5.53265	2.46797	3.04497e-10	3.54013e-08
N4bp2l1	100637	ENSMUSG00000041132	238.052	423.841	52.2629	0.123308	-3.01966	2.46137e-09	2.25674e-07
Naa15	74838	ENSMUSG00000063273	3587.56	2500.41	4674.72	1.86958	0.902713	0.0162138	0.0948573
Naa25	231713	ENSMUSG00000042719	1218.99	764.482	1673.49	2.18906	1.13031	0.00396776	0.0360404
Naa35	78689	ENSMUSG00000021555	931.875	636.189	1227.56	1.92956	0.94827	0.0174263	0.0993667
Naaa	67111	ENSMUSG00000029413	1127.35	590.771	1663.92	2.81653	1.49392	0.000101177	0.00221021
Nab1	17936	ENSMUSG00000002881	4029.58	2507.96	5551.21	2.21344	1.14629	0.00199913	0.0219183
Naca	17938	ENSMUSG00000061315	10433.7	6835.22	14032.1	2.05291	1.03767	0.0156451	0.0929426
Nacc2	67991	ENSMUSG00000026932	449.946	684.835	215.056	0.314026	-1.67105	8.19401e-05	0.00185549
Naga	17939	ENSMUSG00000022453	601.328	881.169	321.487	0.364842	-1.45466	0.000409913	0.00667381
Nagk	56174	ENSMUSG00000034744	558.127	759.253	357.001	0.4702	-1.08865	0.0111801	0.0754329
Naglu	27419	ENSMUSG00000001751	755.014	1221.13	288.897	0.236582	-2.07959	0.000542353	0.00823416
Nagpa	27426	ENSMUSG00000023143	576.855	771.946	381.763	0.494546	-1.01582	0.0123595	0.0804808
Naip2	17948	ENSMUSG00000078945	3398.74	2061.25	4736.23	2.29774	1.20022	0.00179532	0.0201842
Nampt	59027	ENSMUSG00000020572	12090.6	3581.06	20600.1	5.75251	2.52419	0.00180124	0.020193
Nanos1	332397	ENSMUSG00000072437	163.409	267.309	59.51	0.222626	-2.1673	1.98166e-05	0.000569165
Nat6	56441	ENSMUSG00000079334	271.62	418.184	125.057	0.299047	-1.74155	0.000167868	0.00336433
Nat9	66176	ENSMUSG00000015542	123.838	189.285	58.3925	0.308491	-1.6967	0.00169175	0.0193158
Natd1	24083	ENSMUSG00000018931	317.1	543.071	91.1302	0.167805	-2.57514	1.11227e-06	4.8656e-05
Nav2	78286	ENSMUSG00000052512	2771.44	4743.74	799.14	0.168462	-2.5695	7.91995e-10	8.31499e-08
Nbeal2	235627	ENSMUSG00000056724	1149.6	1885.32	413.884	0.21953	-2.18751	2.60016e-08	1.831e-06
Nbr1	17966	ENSMUSG00000017119	3108.19	4190.54	2025.84	0.483432	-1.04862	0.00390942	0.0357115
Ncapg2	76044	ENSMUSG00000042029	776.897	1284.03	269.767	0.210095	-2.25089	5.26064e-08	3.43987e-06
Nceh1	320024	ENSMUSG00000027698	7275.91	12797.7	1754.09	0.137063	-2.86709	1.42868e-13	3.27511e-11
Ncf4	17972	ENSMUSG00000071715	3883.5	2744.57	5022.43	1.82995	0.871804	0.0170188	0.0978554
Nck1	17973	ENSMUSG00000032475	1234.28	656.301	1812.27	2.76134	1.46537	0.000154583	0.0031458
Nck2	17974	ENSMUSG00000066877	249.315	411.424	87.2059	0.211961	-2.23813	3.14473e-06	0.000120256
Nckipsd	80987	ENSMUSG00000032598	391.054	562.858	219.25	0.38953	-1.36019	0.00148736	0.0175994
Ncln	103425	ENSMUSG00000020238	812.281	1073.44	551.121	0.513416	-0.9618	0.012112	0.0793857
Ncoa3	17979	ENSMUSG00000027678	4482.79	6442.95	2522.62	0.391533	-1.3528	0.000375217	0.00624989
Ncoa5	228869	ENSMUSG00000039804	857.318	577.228	1137.41	1.97047	0.978537	0.0140197	0.086799
Ncor2	20602	ENSMUSG00000029478	4221.15	5456.99	2985.31	0.547062	-0.870224	0.0159987	0.0940751
Ndel1	83431	ENSMUSG00000018736	1635.11	1015.6	2254.62	2.21999	1.15055	0.00279073	0.0280743
Ndfip1	65113	ENSMUSG00000024425	969.621	1417.78	521.459	0.367799	-1.44301	0.00017016	0.00339594
Ndrg3	29812	ENSMUSG00000027634	435.133	596.517	273.749	0.458913	-1.12371	0.00804442	0.0600403
Ndrg4	234593	ENSMUSG00000036564	126.301	190.99	61.6115	0.322591	-1.63222	0.00343191	0.0327193
Ndst1	15531	ENSMUSG00000054008	861.008	1317.31	404.701	0.307216	-1.70267	0.00930926	0.0663913
Ndst2	17423	ENSMUSG00000039308	1134.15	1704.21	564.093	0.331	-1.5951	4.64712e-05	0.00116501
Ndst3	83398	ENSMUSG00000027977	13.545	0.669831	26.4202	39.4431	5.3017	0.00159688	0.0185283
Ndufa13	67184	ENSMUSG00000036199	761.861	1144.55	379.168	0.33128	-1.59388	7.10604e-05	0.00164569
Ndufb7	66916	ENSMUSG00000033938	668.553	940.698	396.408	0.421398	-1.24674	0.00136955	0.0165675
Ndufb9	66218	ENSMUSG00000022354	308.694	455.59	161.797	0.355137	-1.49355	0.00069403	0.00998562
Ndufs7	75406	ENSMUSG00000020153	720.198	1040.47	399.925	0.38437	-1.37943	0.000422195	0.00682246
Ndufv1	17995	ENSMUSG00000037916	471.737	677.667	265.808	0.392239	-1.35019	0.000888183	0.0120161
Necap2	66147	ENSMUSG00000028923	1236.07	1644.22	827.93	0.50354	-0.989823	0.0127336	0.0817586
Nedd4l	83814	ENSMUSG00000024589	852.286	1129.09	575.483	0.509688	-0.972314	0.0169863	0.0977668
Nemf	66244	ENSMUSG00000020982	3106.55	2154.77	4058.32	1.88341	0.913349	0.0137759	0.0858414
Neu1	18010	ENSMUSG00000007038	831.087	1194.54	467.636	0.391479	-1.35299	0.000536527	0.00816355
Neurl3	214854	ENSMUSG00000047180	1185.21	1746.07	624.348	0.357574	-1.48369	0.00863815	0.0630589
Nf2	18016	ENSMUSG00000009073	2572.31	3417.06	1727.56	0.50557	-0.984018	0.0091513	0.0656431
Nfam1	74039	ENSMUSG00000058099	2505.44	3519.11	1491.77	0.423907	-1.23818	0.000863752	0.0117355
Nfat5	54446	ENSMUSG00000003847	5738.47	3275.61	8201.34	2.50376	1.3241	0.000262178	0.00477069
Nfatc1	18018	ENSMUSG00000033016	835.129	1337.65	332.607	0.24865	-2.00781	5.50156e-07	2.66211e-05
Nfatc2	18019	ENSMUSG00000027544	634.728	1040.92	228.538	0.219555	-2.18735	1.52344e-07	8.65265e-06
Nfe2l2	18024	ENSMUSG00000015839	5940.76	4056.02	7825.5	1.92935	0.948118	0.00678362	0.0534149
Nfia	18027	ENSMUSG00000028565	129.98	207.969	51.9912	0.249995	-2.00003	0.000179183	0.00354627
Nfib	18028	ENSMUSG00000008575	13.7259	0.939724	26.512	28.2126	4.81827	0.00497223	0.0426055
Nfic	18029	ENSMUSG00000055053	1147.73	1860.46	434.992	0.233808	-2.0966	9.7666e-08	5.97833e-06
Nfil3	18030	ENSMUSG00000056749	529.176	99.2811	959.071	9.66015	3.27205	2.67392e-13	5.40341e-11
Nfkb1	18033	ENSMUSG00000028163	4652.32	1813.71	7490.93	4.13018	2.0462	3.9288e-08	2.62775e-06
Nfkb2	18034	ENSMUSG00000025225	2027.92	879.604	3176.25	3.611	1.8524	1.41775e-06	5.97594e-05
Nfkbie	18037	ENSMUSG00000023947	878.547	363.644	1393.45	3.83191	1.93806	5.80665e-07	2.77501e-05
Nfkbiz	80859	ENSMUSG00000035356	3143.98	368.613	5919.35	16.0584	4.00526	3.0241e-22	2.91036e-19
Ngly1	59007	ENSMUSG00000021785	785.858	542.637	1029.08	1.89644	0.923296	0.0149741	0.0902877
Nid1	18073	ENSMUSG00000005397	14.5838	2.33149	26.8361	11.5103	3.52485	0.0112882	0.0759106
Nipal3	74552	ENSMUSG00000028803	321.825	542.184	101.466	0.187143	-2.41779	1.86899e-07	1.02458e-05
Nkain1	67149	ENSMUSG00000078532	817.682	1207.78	427.588	0.35403	-1.49806	0.000318817	0.00552286
Nkiras2	71966	ENSMUSG00000017837	161.651	235.943	87.3601	0.37026	-1.43339	0.00367795	0.0341259
Nlrc3	268857	ENSMUSG00000049871	144.981	231.785	58.1765	0.250993	-1.99428	0.000177213	0.00351724
Nlrc4	268973	ENSMUSG00000039193	533.612	299.969	767.255	2.55779	1.3549	0.00120735	0.0150467
Nlrp10	244202	ENSMUSG00000049709	122.846	183.133	62.5584	0.341601	-1.54962	0.00410791	0.0369861
Nlrp14	76858	ENSMUSG00000016626	10.3038	0.487685	20.1198	41.2558	5.36653	0.0089337	0.0645096
Nlrp1b	637515	ENSMUSG00000070390	689.72	1235.88	143.559	0.116159	-3.10582	5.71039e-13	1.11147e-10
Nlrp3	216799	ENSMUSG00000032691	5182.61	569.471	9795.74	17.2015	4.10446	2.52646e-20	1.90286e-17
Nlrp4e	446099	ENSMUSG00000045693	14.8819	1.27797	28.4859	22.29	4.47833	0.00279622	0.0281131
Nlrp9a	233001	ENSMUSG00000054102	6.49127	0	12.9825	NaN	NaN	0.0159468	0.0940013
Nlrx1	270151	ENSMUSG00000032109	87.0612	142.831	31.291	0.219076	-2.19049	0.000256975	0.004699
Nme3	79059	ENSMUSG00000073435	61.7621	104.031	19.4928	0.187374	-2.41601	0.000711125	0.0101557
Nme4	56520	ENSMUSG00000024177	77.3427	116.677	38.0085	0.325759	-1.61812	0.0117683	0.078245
Nmi	64685	ENSMUSG00000026946	628.557	262.391	994.723	3.79099	1.92258	0.00359969	0.0337798
Nmnat3	74080	ENSMUSG00000032456	162.449	238.072	86.826	0.364705	-1.4552	0.00372465	0.0344669
Nod1	107607	ENSMUSG00000038058	255.214	116.258	394.171	3.39047	1.76148	0.000439629	0.00703203
Nod2	257632	ENSMUSG00000055994	401.411	87.0622	715.761	8.22126	3.03936	2.41433e-11	3.66873e-09
Nos2	18126	ENSMUSG00000020826	4231.63	27.5512	8435.71	306.183	8.25825	7.35218e-06	0.00024924
Notch1	18128	ENSMUSG00000026923	2178.24	1155.42	3201.06	2.77047	1.47013	0.00207145	0.0224414
Notch2	18129	ENSMUSG00000027878	10576.5	7080.58	14072.4	1.98747	0.990931	0.00520404	0.0440398
Notch3	18131	ENSMUSG00000038146	24.2557	3.91499	44.5965	11.3912	3.50985	0.0128351	0.0822275
Nox1	237038	ENSMUSG00000031257	98.0474	3.29061	192.804	58.5923	5.87264	1.20671e-14	3.42686e-12
Npas2	18143	ENSMUSG00000026077	56.2538	89.3207	23.1868	0.259591	-1.94569	0.00652838	0.0519243
Npc1	18145	ENSMUSG00000024413	5805.95	8870.64	2741.27	0.309028	-1.69419	4.62383e-06	0.000168274
Npepl1	228961	ENSMUSG00000039263	330.25	492.076	168.425	0.342274	-1.54677	0.000536759	0.00816355
Npepps	19155	ENSMUSG00000001441	3481.32	2033.03	4929.61	2.42476	1.27784	0.000640785	0.0093832
Npr3	18162	ENSMUSG00000022206	12.0508	1.15752	22.9442	19.8219	4.30902	0.0115075	0.0769964
Nptx1	18164	ENSMUSG00000025582	369.228	674.87	63.5857	0.0942192	-3.40784	1.92241e-08	1.40257e-06
Nqo2	18105	ENSMUSG00000046949	866.65	1186.55	546.755	0.460796	-1.1178	0.0118733	0.0786842
Nr1d2	353187	ENSMUSG00000021775	685.017	1076.54	293.49	0.272622	-1.87502	0.00348025	0.0330155
Nr1h2	22260	ENSMUSG00000060601	439.18	599.557	278.802	0.465014	-1.10465	0.00756078	0.0573445
Nr3c1	14815	ENSMUSG00000024431	3423.69	2128.54	4718.84	2.21693	1.14857	0.00226368	0.0240133
Nrg1	211323	ENSMUSG00000062991	62.024	1.33966	122.708	91.5965	6.51722	0.00294418	0.029176
Nrg3	18183	ENSMUSG00000041014	12.1879	1.42741	22.9484	16.077	4.00693	0.0167935	0.096965
Nrm	106582	ENSMUSG00000059791	143.521	202.276	84.7662	0.419062	-1.25477	0.0121653	0.0796142
Nrp1	18186	ENSMUSG00000025810	6436.08	10563	2309.15	0.218607	-2.19359	9.46734e-09	7.45467e-07
Nrp2	18187	ENSMUSG00000025969	17760.5	11119	24402	2.19462	1.13397	0.00196088	0.0215535
Nrros	224109	ENSMUSG00000052384	2521.51	3665.41	1377.61	0.375839	-1.41181	0.000257152	0.004699
Nsrp1	237859	ENSMUSG00000037958	1829.39	1197.81	2460.97	2.05457	1.03883	0.00636715	0.0513015
Nt5c1a	230718	ENSMUSG00000054958	13.3925	0.425989	26.3591	61.8775	5.95134	0.000789237	0.0109727
Nthl1	18207	ENSMUSG00000041429	73.6773	116.973	30.3815	0.259731	-1.94491	0.00237129	0.0248354
Ntpcr	66566	ENSMUSG00000031851	87.7094	133.277	42.1419	0.316198	-1.6611	0.00634841	0.0511981
Nucb2	53322	ENSMUSG00000030659	1258.09	825.495	1690.69	2.04809	1.03428	0.00668489	0.0529668
Nudt1	17766	ENSMUSG00000036639	95.7001	140.011	51.3895	0.36704	-1.44599	0.0143516	0.0879525
Nudt13	67725	ENSMUSG00000021809	128.4	184.058	72.7413	0.395208	-1.33931	0.0143388	0.0879525
Nudt16l1	66911	ENSMUSG00000022516	263.431	374.065	152.797	0.408477	-1.29167	0.00591698	0.0486011
Nudt3	56409	ENSMUSG00000024213	674.321	951.329	397.312	0.41764	-1.25967	0.0132283	0.0836426
Nufip1	27275	ENSMUSG00000022009	1274.38	607.661	1941.1	3.19439	1.67554	1.96621e-05	0.000567676
Numa1	101706	ENSMUSG00000066306	5059.93	7576.29	2543.56	0.335727	-1.57464	2.39793e-05	0.000667836
Numb	18222	ENSMUSG00000021224	1025.94	1414.89	636.979	0.450196	-1.15138	0.00236249	0.0247982
Nup54	269113	ENSMUSG00000034826	816.073	499.826	1132.32	2.26543	1.17978	0.002507	0.025835
Nupl1	71844	ENSMUSG00000063895	1541.55	1031.55	2051.54	1.9888	0.991896	0.00880284	0.0639422
Nupr1	56312	ENSMUSG00000030717	421.423	127.385	715.46	5.61653	2.48968	2.50761e-05	0.000691709
Nus1	52014	ENSMUSG00000023068	2922.56	1970.07	3875.04	1.96695	0.975964	0.00966994	0.0679839
Nvl	67459	ENSMUSG00000026516	1847.52	1270.47	2424.57	1.9084	0.932362	0.0129825	0.0828653
Oaf	102644	ENSMUSG00000032014	102.24	25.9643	178.515	6.87541	2.78145	0.00126364	0.0156023
Ocel1	77090	ENSMUSG00000002396	189.697	268.362	111.031	0.413735	-1.27322	0.00851494	0.0624753
Odf2l	52184	ENSMUSG00000028256	541.256	362.267	720.246	1.98816	0.991436	0.0159753	0.0940334
Ogfod2	66627	ENSMUSG00000023707	128.627	200.539	56.7149	0.282812	-1.82208	0.00070527	0.0100994
Oit3	18302	ENSMUSG00000009654	179.853	255.289	104.417	0.409015	-1.28978	0.00956926	0.0674403
Onecut2	225631	ENSMUSG00000045991	36.4491	5.62874	67.2694	11.951	3.57906	0.0134043	0.084315
Ophn1	94190	ENSMUSG00000031214	507.929	746.139	269.719	0.361487	-1.46799	0.000390519	0.00643057
Optn	71648	ENSMUSG00000026672	1118.78	728.459	1509.09	2.07162	1.05076	0.00644354	0.0515811
Orai3	269999	ENSMUSG00000043964	415.88	626.121	205.638	0.328432	-1.60633	0.000171576	0.00341758
Osbpl11	106326	ENSMUSG00000022807	1879.24	2602.52	1155.96	0.44417	-1.17082	0.00176927	0.0199538
Osbpl8	237542	ENSMUSG00000020189	17951.7	25621.9	10281.5	0.401279	-1.31732	0.000503201	0.00781055
Osgep	66246	ENSMUSG00000006289	228.362	320.089	136.635	0.426865	-1.22815	0.00798305	0.0597109
Osgin2	209212	ENSMUSG00000041153	216.168	123.441	308.894	2.50236	1.32329	0.00500448	0.04279
Osm	18413	ENSMUSG00000058755	84.8458	38.7625	130.929	3.37772	1.75605	0.00331972	0.0318556
Otub1	107260	ENSMUSG00000024767	819.399	1111.66	527.141	0.474194	-1.07645	0.00619224	0.0502192
Otud1	71198	ENSMUSG00000043415	157.929	242.249	73.6091	0.303857	-1.71854	0.00156957	0.0182604
Otud7b	229603	ENSMUSG00000038495	407.074	571.644	242.503	0.424221	-1.23711	0.00435291	0.0384918
Ovol1	18426	ENSMUSG00000024922	54.9168	18.5988	91.2348	4.90541	2.29437	0.00366107	0.0340778
Oxr1	170719	ENSMUSG00000022307	2059.18	2927.7	1190.66	0.406687	-1.29801	0.000582889	0.00874233
P2rx7	18439	ENSMUSG00000029468	666.607	1033.86	299.351	0.289546	-1.78814	1.71839e-05	0.000508849
P2ry1	18441	ENSMUSG00000027765	190.007	322.499	57.5144	0.17834	-2.4873	1.12e-06	4.87483e-05
P2ry2	18442	ENSMUSG00000032860	851.182	371.401	1330.96	3.58363	1.84142	5.78267e-06	0.000204435
P2ry6	233571	ENSMUSG00000048779	989.306	1468.64	509.974	0.347243	-1.52598	7.44664e-05	0.0017154
P4ha1	18451	ENSMUSG00000019916	5736.33	3322.05	8150.62	2.45349	1.29484	0.00703961	0.0546358
P4ha2	18452	ENSMUSG00000018906	237.786	130.157	345.414	2.65382	1.40807	0.00855427	0.0627076
Pabpc6	67543	ENSMUSG00000046173	10.2263	0.487685	19.9649	40.9382	5.35537	0.0155878	0.0927292
Pacrg	69310	ENSMUSG00000037196	81.0309	131.869	30.1929	0.228962	-2.12682	0.000826522	0.0113724
Pacs2	217893	ENSMUSG00000021143	2733.35	3877.43	1589.28	0.40988	-1.28673	0.00802174	0.0599485
Padi2	18600	ENSMUSG00000028927	736.78	1167.74	305.821	0.261891	-1.93296	3.79698e-06	0.000142301
Pafah1b2	18475	ENSMUSG00000003131	2983.48	1971.94	3995.02	2.02593	1.01858	0.00641332	0.0515032
Pald1	27355	ENSMUSG00000020092	448.976	780.764	117.188	0.150094	-2.73606	0.00186955	0.0208137
Pank1	75735	ENSMUSG00000033610	178.5	248.358	108.642	0.437443	-1.19283	0.0132176	0.0836265
Paox	212503	ENSMUSG00000025464	149.347	235.876	62.8187	0.266321	-1.90876	0.000262484	0.00477127
Paqr4	76498	ENSMUSG00000023909	91.3511	150.667	32.0357	0.212627	-2.2336	0.000267816	0.00484277
Paqr7	71904	ENSMUSG00000037348	181.698	334.024	29.372	0.0879339	-3.50744	7.25584e-11	1.00554e-08
Pard3	93742	ENSMUSG00000025812	21.0585	3.3946	38.7224	11.407	3.51185	0.0042234	0.0377707
Parp1	11545	ENSMUSG00000026496	1647.73	2392.43	903.026	0.377451	-1.40564	0.000236164	0.00439428
Parp14	547253	ENSMUSG00000034422	17700.8	8259.52	27142	3.28615	1.7164	0.00374025	0.0345191
Parp8	52552	ENSMUSG00000021725	1567.55	936.248	2198.86	2.34858	1.23179	0.00427634	0.0380087
Parvb	170736	ENSMUSG00000022438	505.103	769.136	241.069	0.313428	-1.67379	4.37921e-05	0.00110585
Patz1	56218	ENSMUSG00000020453	231.666	381.491	81.8412	0.21453	-2.22075	3.80301e-06	0.000142301
Pccb	66904	ENSMUSG00000032527	353.783	518.089	189.478	0.365724	-1.45117	0.00102063	0.0133437
Pcdh10	18526	ENSMUSG00000049100	15.6657	2.21769	29.1137	13.1279	3.71457	0.00508744	0.0433923
Pcdh20	219257	ENSMUSG00000050505	8.26404	0.425989	16.1021	37.7993	5.24029	0.01522	0.0914194
Pcdhb14	93885	ENSMUSG00000044043	11.1615	1.09582	21.2272	19.3711	4.27583	0.0105098	0.0719328
Pcgf3	69587	ENSMUSG00000033623	1354.43	821.338	1887.51	2.2981	1.20044	0.00172836	0.0196202
Pck2	74551	ENSMUSG00000040618	209.268	361.34	57.1957	0.158288	-2.65938	1.39156e-07	8.00862e-06
Pcmtd2	245867	ENSMUSG00000027589	488.408	682.174	294.642	0.431915	-1.21118	0.00425818	0.0379057
Pcna	18538	ENSMUSG00000027342	5979.85	8461.14	3498.56	0.413486	-1.27409	0.00384273	0.035221
Pcnxl3	104401	ENSMUSG00000054874	823.807	1262.48	385.132	0.30506	-1.71284	1.70136e-05	0.000505536
Pcp4l1	66425	ENSMUSG00000038370	1175.01	1895.5	454.526	0.239792	-2.06014	1.96668e-07	1.07473e-05
Pcsk5	18552	ENSMUSG00000024713	29.3192	8.20996	50.4284	6.14235	2.61879	0.0175322	0.0997857
Pctp	18559	ENSMUSG00000020553	307.995	419.72	196.27	0.46762	-1.09659	0.0122843	0.0801512
Pcyox1	66881	ENSMUSG00000029998	1183.55	1898.31	468.802	0.246958	-2.01766	4.02911e-07	2.04083e-05
Pcyt1a	13026	ENSMUSG00000005615	1882.85	3073.02	692.68	0.225407	-2.1494	1.90042e-05	0.000553294
Pdcd10	56426	ENSMUSG00000027835	2663.98	1512.96	3815.01	2.52156	1.33431	0.000380893	0.00632618
Pdcd4	18569	ENSMUSG00000024975	298.775	513.494	84.0566	0.163696	-2.61091	2.69971e-08	1.89223e-06
Pddc1	213350	ENSMUSG00000051007	275.468	406.524	144.411	0.355234	-1.49316	0.000893402	0.0120345
Pde10a	23984	ENSMUSG00000023868	33.6972	3.37815	64.0163	18.9501	4.24414	0.00345492	0.0328646
Pde11a	241489	ENSMUSG00000075270	12.3498	1.76565	22.934	12.989	3.69922	0.014989	0.0903458
Pde12	211948	ENSMUSG00000043702	1153.49	783.785	1523.19	1.94338	0.958571	0.0159222	0.0939442
Pde3b	18576	ENSMUSG00000030671	256.791	399.236	114.345	0.28641	-1.80384	0.00475449	0.0412726
Pde4a	18577	ENSMUSG00000032177	306.489	419.84	193.139	0.460031	-1.1202	0.0125272	0.0811647
Pdgfa	18590	ENSMUSG00000025856	183.295	253.421	113.17	0.446568	-1.16305	0.0158598	0.0937996
Pdgfc	54635	ENSMUSG00000028019	64.4032	102.414	26.3928	0.257708	-1.95619	0.0044551	0.0392752
Pdgfrb	18596	ENSMUSG00000024620	74.7032	11.878	137.529	11.5785	3.53337	1.79167e-06	7.30285e-05
Pdk2	18604	ENSMUSG00000038967	103.676	181.917	25.4345	0.139814	-2.83842	0.000385889	0.00638468
Pdlim2	213019	ENSMUSG00000022090	204.186	297.01	111.361	0.374939	-1.41527	0.0026873	0.0273193
Pdlim5	56376	ENSMUSG00000028273	3113.16	4452	1774.32	0.398544	-1.32719	0.000402103	0.00657756
Pdp1	381511	ENSMUSG00000049225	561.314	854.252	268.375	0.314164	-1.67041	4.93505e-05	0.00122654
Pdpr	319518	ENSMUSG00000033624	385.64	562.666	208.614	0.37076	-1.43144	0.00085207	0.0116494
Pdxk	216134	ENSMUSG00000032788	3722.63	6878.51	566.761	0.0823959	-3.60128	3.55242e-07	1.8315e-05
Pdzk1ip1	67182	ENSMUSG00000028716	109.321	185.842	32.8005	0.176496	-2.50229	2.13572e-05	0.000604527
Pea15a	18611	ENSMUSG00000013698	4251.26	5648.27	2854.26	0.505332	-0.984696	0.00770971	0.0580927
Pebp1	23980	ENSMUSG00000032959	843.44	1171.7	515.18	0.439686	-1.18545	0.00209201	0.0225532
Peg10	170676	ENSMUSG00000092035	167.905	12.6197	323.19	25.61	4.67863	4.53689e-10	5.00589e-08
Peli1	67245	ENSMUSG00000020134	1206.3	768.324	1644.27	2.14007	1.09766	0.00610525	0.0496999
Peli2	93834	ENSMUSG00000021846	269.071	437.428	100.715	0.230243	-2.11877	2.73666e-05	0.000744224
Per3	18628	ENSMUSG00000028957	177.912	253.028	102.797	0.406267	-1.2995	0.0134678	0.0846337
Pet100	100503890	ENSMUSG00000087687	1209.13	763.074	1655.19	2.1691	1.1171	0.00463183	0.0405648
Pex26	74043	ENSMUSG00000067825	105.986	166.28	45.6911	0.274783	-1.86364	0.00110457	0.0141235
Pex6	224824	ENSMUSG00000002763	259.382	378.388	140.376	0.370984	-1.43057	0.00159797	0.0185285
Pf4	56744	ENSMUSG00000029373	724.86	206.09	1243.63	6.03441	2.59321	0.00203041	0.0221498
Pfdn1	67199	ENSMUSG00000024346	1015.42	554.513	1476.32	2.66238	1.41272	0.00774461	0.0582544
Pfdn4	109054	ENSMUSG00000052033	386.736	203.999	569.473	2.79154	1.48106	0.0160614	0.0942881
Pfkfb2	18640	ENSMUSG00000026409	678.414	901.739	455.088	0.504678	-0.986564	0.0123893	0.0805737
Pfkfb3	170768	ENSMUSG00000026773	5965.67	527.66	11403.7	21.6118	4.43375	0.00142957	0.0171381
Pfkfb4	270198	ENSMUSG00000025648	365.521	531.037	200.006	0.376633	-1.40877	0.000974031	0.0128901
Pfkm	18642	ENSMUSG00000033065	94.2857	137.677	50.8946	0.369667	-1.4357	0.0122813	0.0801512
Pgls	66171	ENSMUSG00000031807	139.694	222.874	56.5146	0.253572	-1.97953	0.000264702	0.00479647
Phactr2	215789	ENSMUSG00000062866	952.398	1431.41	473.385	0.330712	-1.59635	7.0502e-05	0.00163714
Phf1	21652	ENSMUSG00000024193	95.731	154.852	36.6098	0.236418	-2.08059	0.000383969	0.00636506
Phka2	110094	ENSMUSG00000031295	1495.81	2475.23	516.396	0.208626	-2.26101	1.60036e-08	1.19496e-06
Phlda1	21664	ENSMUSG00000020205	333.045	28.2572	637.833	22.5725	4.49649	0.000186196	0.0036455
Phpt1	75454	ENSMUSG00000036504	64.1476	98.1491	30.146	0.307145	-1.70301	0.0105047	0.0719289
Pi4kb	107650	ENSMUSG00000038861	855.728	1129.5	581.961	0.515239	-0.956685	0.0123604	0.0804808
Pias3	229615	ENSMUSG00000028101	163.903	238.292	89.5141	0.375648	-1.41255	0.00516303	0.0438427
Pid1	98496	ENSMUSG00000045658	12150.6	6377.95	17923.2	2.81019	1.49067	7.0312e-05	0.0016365
Piezo1	234839	ENSMUSG00000014444	6951.5	10311.9	3591.09	0.348247	-1.52182	3.17488e-05	0.00085137
Pigh	110417	ENSMUSG00000021120	145.071	208.416	81.7257	0.392128	-1.35061	0.00812423	0.0604276
Pigq	14755	ENSMUSG00000025728	610.983	862.398	359.568	0.41694	-1.26209	0.00180122	0.020193
Pigs	276846	ENSMUSG00000041958	356.2	507.053	205.348	0.404983	-1.30407	0.00246546	0.0255098
Pigt	78928	ENSMUSG00000017721	981.129	1335.63	626.628	0.469162	-1.09184	0.00457846	0.0401566
Pigyl	66268	ENSMUSG00000010607	51.7798	90.2664	13.2931	0.147265	-2.76351	0.000215658	0.00409149
Pigz	239827	ENSMUSG00000045625	64.3736	100.745	28.0023	0.277952	-1.84709	0.0095628	0.0674222
Pik3c2a	18704	ENSMUSG00000030660	4426.1	2625.65	6226.56	2.37143	1.24576	0.0144869	0.0885595
Pik3r2	18709	ENSMUSG00000031834	414.909	638.435	191.383	0.299768	-1.73808	0.000592859	0.0088383
Pik3r4	75669	ENSMUSG00000032571	664.321	896.367	432.275	0.482252	-1.05214	0.00874117	0.0635965
Pik3r5	320207	ENSMUSG00000020901	14342.8	9058.19	19627.4	2.16681	1.11557	0.00168847	0.0193158
Pik3r6	104709	ENSMUSG00000046207	652.045	338.838	965.251	2.84871	1.51031	0.000124599	0.0026419
Pilra	231805	ENSMUSG00000046245	622.494	42.3209	1202.67	28.4178	4.82872	1.09936e-21	9.5221e-19
Pilrb1	170741	ENSMUSG00000066684	84.0386	9.97287	158.104	15.8534	3.98672	8.05876e-09	6.43327e-07
Pilrb2	545812	ENSMUSG00000066682	87.5371	9.24134	165.833	17.9447	4.16548	1.39717e-09	1.39098e-07
Pim1	18712	ENSMUSG00000024014	2530.28	808.466	4252.1	5.25946	2.39491	1.57201e-10	1.96461e-08
Pink1	68943	ENSMUSG00000028756	627.002	906.307	347.697	0.383642	-1.38217	0.0160053	0.0940818
Pinx1	72400	ENSMUSG00000021958	464.098	244.334	683.862	2.79889	1.48485	0.000494021	0.00772376
Pip4k2a	18718	ENSMUSG00000026737	2349.84	3279.73	1419.96	0.43295	-1.20773	0.0013274	0.0161934
Pirb	18733	ENSMUSG00000058818	25952.4	10502.7	41402.1	3.94203	1.97894	8.53233e-08	5.29769e-06
Piwil2	57746	ENSMUSG00000033644	125.192	31.206	219.179	7.02361	2.81221	1.73811e-06	7.11805e-05
Piwil4	330890	ENSMUSG00000036912	13.9906	1.9478	26.0334	13.3656	3.74045	0.00676093	0.0532681
Pkd1	18763	ENSMUSG00000032855	1298.67	1911.48	685.857	0.358809	-1.47871	0.000142089	0.00295842
Pkd2l1	329064	ENSMUSG00000037578	7.75121	0	15.5024	NaN	NaN	0.00756406	0.0573445
Pkhd1	241035	ENSMUSG00000043760	31.5895	4.01899	59.16	14.7201	3.87972	0.0175055	0.09972
Pkhd1l1	192190	ENSMUSG00000038725	35.8797	5.3847	66.3747	12.3265	3.6237	0.0130572	0.0830666
Pkib	18768	ENSMUSG00000019876	398.82	605.772	191.867	0.316732	-1.65867	0.000208948	0.00399956
Pkig	18769	ENSMUSG00000035268	352.276	510.17	194.381	0.381013	-1.39209	0.0013664	0.0165616
Pkn1	320795	ENSMUSG00000057672	1619.89	2554.04	685.74	0.268492	-1.89705	7.9388e-07	3.61905e-05
Pla2g15	192654	ENSMUSG00000031903	1515.31	2538.91	491.708	0.193669	-2.36834	0.000698492	0.0100248
Plaa	18786	ENSMUSG00000028577	2592.95	1702.51	3483.38	2.04602	1.03282	0.0063574	0.0512467
Plagl2	54711	ENSMUSG00000051413	2620.84	1069.01	4172.68	3.90332	1.9647	3.7251e-07	1.90917e-05
Plat	18791	ENSMUSG00000031538	56.7126	1.87945	111.546	59.3503	5.89118	8.99017e-11	1.19798e-08
Plaur	18793	ENSMUSG00000046223	1379.69	423.568	2335.82	5.51463	2.46326	2.95763e-08	2.04123e-06
Plbd2	71772	ENSMUSG00000029598	1008.13	1386.38	629.882	0.454337	-1.13816	0.00694189	0.0542342
Plcb2	18796	ENSMUSG00000040061	834.13	1345.4	322.86	0.239973	-2.05905	5.81498e-07	2.77501e-05
Pld2	18806	ENSMUSG00000020828	565.723	786.251	345.195	0.439039	-1.18758	0.00333012	0.0319069
Pld3	18807	ENSMUSG00000003363	8181.91	11719.7	4644.1	0.396263	-1.33547	0.0070228	0.0546088
Pld4	104759	ENSMUSG00000052160	2928.64	4553.26	1304.03	0.286394	-1.80393	0.000131326	0.00275752
Plek	56193	ENSMUSG00000020120	26216.5	3811.17	48621.9	12.7577	3.6733	9.57803e-16	3.31841e-13
Plekhb2	226971	ENSMUSG00000026123	1544.74	2003.54	1085.94	0.542013	-0.883601	0.0157896	0.0935124
Plekhg1	213783	ENSMUSG00000040624	469.385	166.695	772.075	4.63167	2.21153	0.016371	0.0955828
Plekhg3	263406	ENSMUSG00000052609	674.517	954.825	394.208	0.412859	-1.27628	0.00134262	0.016356
Plekhh2	213556	ENSMUSG00000040852	140.132	230.61	49.655	0.21532	-2.21544	0.000899128	0.0121022
Plekhj1	78670	ENSMUSG00000035278	312.968	455.108	170.828	0.375357	-1.41366	0.0014034	0.0168593
Plekhm1	353047	ENSMUSG00000034247	3306.65	5740.31	872.985	0.15208	-2.7171	5.53635e-07	2.67148e-05
Plekhm2	69582	ENSMUSG00000028917	2076.44	3258.44	894.441	0.2745	-1.86512	0.000108943	0.00235902
Plekho1	67220	ENSMUSG00000015745	1118.92	1971.89	265.952	0.134871	-2.89034	1.63423e-12	2.97997e-10
Plekho2	102595	ENSMUSG00000050721	6795.2	9745.46	3844.95	0.394537	-1.34177	0.000368191	0.00615633
Plin2	11520	ENSMUSG00000028494	7252.09	10924.8	3579.4	0.327641	-1.60981	7.76094e-06	0.000261054
Plin3	66905	ENSMUSG00000024197	958.707	1366.2	551.21	0.403461	-1.3095	0.00111702	0.014228
Plk3	12795	ENSMUSG00000028680	344.521	120.477	568.564	4.71926	2.23856	1.08338e-06	4.75126e-05
Plk5	216166	ENSMUSG00000035486	8.20541	0	16.4108	NaN	NaN	0.00827435	0.0611504
Plod1	18822	ENSMUSG00000019055	2318.89	3169.06	1468.72	0.463458	-1.10949	0.00214625	0.0229768
Plod3	26433	ENSMUSG00000004846	877.848	1153.24	602.461	0.522409	-0.936748	0.0149731	0.0902877
Plpp2	50784	ENSMUSG00000052151	182.705	272.085	93.3236	0.342994	-1.54375	0.001721	0.0195622
Plpp5	71910	ENSMUSG00000031570	410.927	259.742	562.111	2.16412	1.11378	0.0109058	0.0740866
Plscr4	235527	ENSMUSG00000032377	245.373	385.043	105.703	0.274524	-1.865	0.0001207	0.00256865
Pltp	18830	ENSMUSG00000017754	9358.71	13882.6	4834.79	0.348262	-1.52175	0.00291526	0.0289903
Plxdc1	72324	ENSMUSG00000017417	428.935	750.327	107.543	0.143328	-2.80261	3.99845e-10	4.52714e-08
Plxna2	18845	ENSMUSG00000026640	1344.48	1995.37	693.577	0.347592	-1.52453	0.00143404	0.0171716
Plxnb2	140570	ENSMUSG00000036606	14050.5	19224.5	8876.41	0.461724	-1.1149	0.00205526	0.0223278
Plxnc1	54712	ENSMUSG00000074785	3285.1	5142.35	1427.84	0.277663	-1.84859	0.00124297	0.015402
Plxnd1	67784	ENSMUSG00000030123	4803.62	6646.68	2960.57	0.445421	-1.16676	0.00718769	0.0555363
Pmm1	29858	ENSMUSG00000022474	231.98	347.983	115.977	0.333285	-1.58517	0.000700933	0.0100515
Pmp22	18858	ENSMUSG00000018217	5728.88	7464.27	3993.49	0.535015	-0.902349	0.0129957	0.082888
Pnkd	56695	ENSMUSG00000026179	202.461	295.488	109.435	0.370352	-1.43303	0.00235902	0.024788
Pnkp	59047	ENSMUSG00000002963	278.234	378.357	178.11	0.470748	-1.08697	0.0145017	0.08858
Pnma3	245468	ENSMUSG00000046287	8.71174	0.243843	17.1796	70.4538	6.13861	0.0167819	0.0969367
Pno1	66249	ENSMUSG00000020116	2559.62	1245.46	3873.79	3.11033	1.63707	1.9845e-05	0.000569165
Pnp	18950	ENSMUSG00000021871	3420.43	1669.14	5171.71	3.09843	1.63154	1.55269e-05	0.000467777
Pnp2	667034	ENSMUSG00000068417	31.3432	9.52378	53.1626	5.58209	2.48081	0.00965206	0.0678858
Pnpla6	50767	ENSMUSG00000004565	332.279	484.36	180.199	0.372035	-1.42649	0.00148575	0.0175923
Pnpla7	241274	ENSMUSG00000036833	2282.8	3825.84	739.769	0.193361	-2.37063	0.000817648	0.0112772
Pnpo	103711	ENSMUSG00000018659	157.839	227.904	87.7735	0.385134	-1.37657	0.00646441	0.0516288
Pnrc1	108767	ENSMUSG00000040128	1463.96	994.126	1933.8	1.94523	0.959937	0.00861601	0.0629926
Pold1	18971	ENSMUSG00000038644	174.766	288.728	60.8033	0.21059	-2.24749	0.00109592	0.0140522
Pold2	18972	ENSMUSG00000020471	121.088	177.088	65.0881	0.367547	-1.444	0.00662728	0.0526143
Polr2f	69833	ENSMUSG00000033020	121.424	177.936	64.9125	0.364809	-1.45479	0.00583072	0.0480015
Polr2j	20022	ENSMUSG00000039771	598.839	805.025	392.654	0.487755	-1.03577	0.00951285	0.0672342
Polr2k	1.00862e+22	ENSMUSG00000045996	492.753	302.932	682.575	2.25323	1.17199	0.00501909	0.0428938
Polr3d	67065	ENSMUSG00000000776	698.22	348.49	1047.95	3.00711	1.58838	9.35018e-05	0.00207127
Pomk	74653	ENSMUSG00000037251	162.161	228.169	96.1541	0.421416	-1.24668	0.0104163	0.0715184
Pomt2	217734	ENSMUSG00000034126	180.837	251.797	109.876	0.436369	-1.19638	0.0158131	0.0935874
Pon2	330260	ENSMUSG00000032667	572.936	791.594	354.278	0.44755	-1.15988	0.00373438	0.0345017
Pou2f2	18987	ENSMUSG00000008496	1501.46	913.369	2089.55	2.28774	1.19392	0.00349752	0.0331442
Pparg	19016	ENSMUSG00000000440	839.891	1426.03	253.757	0.177947	-2.49048	2.32517e-09	2.15396e-07
Ppef2	19023	ENSMUSG00000029410	13.612	0.425989	26.7979	62.9077	5.97516	0.000637225	0.00933896
Ppfibp2	19024	ENSMUSG00000036528	784.409	313.466	1255.35	4.00474	2.00171	0.00366082	0.0340778
Ppid	67738	ENSMUSG00000027804	846.513	563.576	1129.45	2.00408	1.00294	0.0117075	0.0779137
Ppig	228005	ENSMUSG00000042133	5238.1	2883.63	7592.57	2.63299	1.3967	0.00019993	0.00386971
Ppm1n	232941	ENSMUSG00000030402	13.5492	0.731528	26.3669	36.0436	5.17167	0.00273041	0.0276602
Ppp1r12a	17931	ENSMUSG00000019907	5646.07	3813.97	7478.16	1.96073	0.97139	0.00816881	0.0606445
Ppp1r12c	232807	ENSMUSG00000019254	1421.16	1952.13	890.179	0.456004	-1.13288	0.00341444	0.0325886
Ppp1r15b	108954	ENSMUSG00000046062	3723.39	2050.5	5396.27	2.63168	1.39599	0.000254799	0.00468069
Ppp1r16a	73062	ENSMUSG00000033819	202.422	306.048	98.7961	0.322812	-1.63123	0.000979072	0.0129371
Ppp1r16b	228852	ENSMUSG00000037754	199.866	96.0371	303.696	3.16228	1.66096	0.0023596	0.024788
Ppp2r4	110854	ENSMUSG00000039515	780.362	1210.96	349.763	0.288831	-1.7917	6.78775e-06	0.000233766
Ppp2r5a	226849	ENSMUSG00000026626	3036	1964.22	4107.77	2.0913	1.0644	0.0125632	0.0812293
Ppp3ca	19055	ENSMUSG00000028161	1695.9	2218.9	1172.91	0.528601	-0.919749	0.0169877	0.0977668
Ppp3cc	19057	ENSMUSG00000022092	293.707	135.348	452.067	3.34003	1.73986	0.000154101	0.0031458
Ppp4c	56420	ENSMUSG00000030697	699.205	922.549	475.861	0.515811	-0.955085	0.0119737	0.0789047
Ppp4r2	232314	ENSMUSG00000052144	4882.16	2622.1	7142.22	2.72385	1.44565	8.62126e-05	0.00192954
Ppp6r2	71474	ENSMUSG00000036561	397.447	556.258	238.636	0.429002	-1.22094	0.00453462	0.0398747
Ppt2	54397	ENSMUSG00000015474	384.231	526.996	241.465	0.458191	-1.12598	0.00816616	0.0606445
Pqlc1	66943	ENSMUSG00000034006	415.952	581.494	250.41	0.430632	-1.21547	0.00425065	0.0378775
Pqlc2	212555	ENSMUSG00000028744	151.613	224.955	78.2704	0.347938	-1.5231	0.00314788	0.030618
Prcp	72461	ENSMUSG00000061119	1005.43	1420.66	590.207	0.415445	-1.26727	0.00166356	0.0190847
Prdm1	12142	ENSMUSG00000038151	725.12	443.047	1007.19	2.27333	1.18481	0.00426057	0.0379075
Prdx2	21672	ENSMUSG00000005161	1175.28	1700.96	649.599	0.381902	-1.38873	0.000270159	0.00486221
Prdx5	54683	ENSMUSG00000024953	2330.4	1018.6	3642.2	3.57568	1.83822	2.6786e-06	0.000104508
Prelid2	77619	ENSMUSG00000056671	244.353	81.9341	406.771	4.96461	2.31168	2.81002e-06	0.000109036
Prex2	109294	ENSMUSG00000048960	74.0188	26.3705	121.667	4.61377	2.20595	0.0101817	0.0703818
Prickle2	243548	ENSMUSG00000030020	17.47	2.73142	32.2086	11.7919	3.55972	0.0049591	0.042549
Prkacb	18749	ENSMUSG00000005034	2710.95	3859.56	1562.34	0.404798	-1.30473	0.000465819	0.00736258
Prkag2	108099	ENSMUSG00000028944	270.028	438.025	102.032	0.232936	-2.10199	6.16747e-06	0.000214106
Prkcd	18753	ENSMUSG00000021948	3978.6	2810.95	5146.26	1.83079	0.872467	0.0126006	0.0813569
Prkch	18755	ENSMUSG00000021108	1409.59	2045.82	773.356	0.378017	-1.40348	0.000647477	0.00943586
Prkd1	18760	ENSMUSG00000002688	14.3608	2.18499	26.5366	12.145	3.60229	0.0168729	0.0972679
Prkrip1	66801	ENSMUSG00000039737	477.614	309.501	645.728	2.08635	1.06098	0.0133639	0.0842137
Prpf40a	56194	ENSMUSG00000061136	8714.16	4738.4	12689.9	2.6781	1.42121	0.000151951	0.00311213
Prps2	110639	ENSMUSG00000025742	466.347	677.104	255.591	0.377476	-1.40554	0.000948684	0.0126611
Prr12	233210	ENSMUSG00000046574	928.034	1345.74	510.324	0.379214	-1.39892	0.000270294	0.00486221
Prrc1	73137	ENSMUSG00000024594	527.634	763.157	292.112	0.382768	-1.38546	0.000842405	0.011536
Prrc2c	226562	ENSMUSG00000040225	20770.1	13775.6	27764.7	2.0155	1.01114	0.00557175	0.0464259
Psap	19156	ENSMUSG00000004207	104609	154065	55152	0.357978	-1.48206	6.10696e-05	0.00146143
Psen2	19165	ENSMUSG00000010609	1021.06	1646.09	396.027	0.240587	-2.05537	2.27856e-07	1.22583e-05
Psenen	66340	ENSMUSG00000036835	704.038	959.592	448.483	0.467368	-1.09737	0.00541668	0.0455501
Pskh1	244631	ENSMUSG00000048310	163.773	247.701	79.8445	0.322342	-1.63333	0.00135563	0.0164734
Psma2	19166	ENSMUSG00000015671	2625.34	1584.81	3665.88	2.31314	1.20985	0.00131352	0.0160806
Psma3	19167	ENSMUSG00000060073	4145.14	2838.75	5451.54	1.9204	0.941409	0.0131881	0.0835007
Psma4	26441	ENSMUSG00000032301	3960.52	2143.5	5777.53	2.69537	1.43049	0.000631074	0.00925664
Psma5	26442	ENSMUSG00000068749	2581.47	1105.48	4057.45	3.67031	1.8759	0.00263031	0.0268186
Psma6	26443	ENSMUSG00000021024	10265.8	2751.98	17779.6	6.46068	2.69169	5.09575e-12	8.3277e-10
Psmb4	19172	ENSMUSG00000005779	504.085	685.144	323.027	0.471474	-1.08475	0.00698712	0.0544235
Psmb7	19177	ENSMUSG00000026750	4301.2	2582.86	6019.54	2.33057	1.22068	0.00129565	0.0159068
Psmc1	19179	ENSMUSG00000021178	1967.91	1352.26	2583.55	1.91054	0.933978	0.0139017	0.086373
Psmc2	19181	ENSMUSG00000028932	2422.25	1551.08	3293.42	2.1233	1.08631	0.00480374	0.0415868
Psmc4	23996	ENSMUSG00000030603	3001.25	1970.94	4031.56	2.0455	1.03245	0.00643191	0.0515118
Psmc6	67089	ENSMUSG00000021832	2483.46	1336.41	3630.5	2.71661	1.44181	0.000175969	0.00349979
Psmd1	70247	ENSMUSG00000026229	7566.46	5195.74	9937.17	1.91256	0.935505	0.014571	0.0888777
Psmd10	53380	ENSMUSG00000031429	609.336	337.832	880.841	2.60733	1.38258	0.000853573	0.0116521
Psmd12	66997	ENSMUSG00000020720	2614.42	1667.85	3560.98	2.13507	1.09428	0.00382184	0.035092
Psmd5	66998	ENSMUSG00000026869	1296.11	831.939	1760.29	2.11589	1.08126	0.00565113	0.0468844
Psmd7	17463	ENSMUSG00000039067	3732.11	2474.72	4989.49	2.01618	1.01163	0.00720602	0.0556531
Ptbp3	230257	ENSMUSG00000028382	15018.7	9863.1	20174.4	2.04544	1.03241	0.00470647	0.0410924
Ptchd1	211612	ENSMUSG00000041552	652.841	1022.57	283.113	0.276864	-1.85275	1.0258e-05	0.000330803
Ptger1	19216	ENSMUSG00000019464	791.322	1081.16	501.485	0.46384	-1.1083	0.00888276	0.0642846
Ptges3	10264146456351	ENSMUSG00000071072	6739.37	4342.04	9136.7	2.10424	1.0733	0.00562865	0.0467426
Ptgir	19222	ENSMUSG00000043017	269.765	144.844	394.687	2.72492	1.44621	0.000912319	0.0122512
Ptgr2	77219	ENSMUSG00000072946	446.648	635.599	257.696	0.405438	-1.30245	0.00160633	0.0185881
Ptgs1	19224	ENSMUSG00000047250	112.201	201.365	23.0376	0.114407	-3.12775	0.00647824	0.051656
Ptms	69202	ENSMUSG00000030122	1780.54	3153.01	408.071	0.129423	-2.94984	1.91701e-13	4.15104e-11
Ptp4a1	10264313119243	ENSMUSG00000026064	480.143	305.764	654.522	2.14061	1.09802	0.00934446	0.0665601
Ptpn12	19248	ENSMUSG00000028771	4777.85	2159.53	7396.18	3.4249	1.77606	2.53097e-06	9.89705e-05
Ptpn18	19253	ENSMUSG00000026126	337.107	595.037	79.1759	0.13306	-2.90985	5.65909e-10	6.12702e-08
Ptpn2	19255	ENSMUSG00000024539	1705.64	874.688	2536.6	2.9	1.53605	6.99635e-05	0.00163339
Ptpra	19262	ENSMUSG00000027303	5233.85	7676.72	2790.98	0.363564	-1.45972	6.97102e-05	0.00162967
Ptprb	19263	ENSMUSG00000020154	29.2613	5.13126	53.3914	10.4051	3.37922	0.0161301	0.0944951
Ptpre	19267	ENSMUSG00000041836	5794.33	2730.72	8857.93	3.24381	1.69769	0.000622165	0.00915697
Ptprg	19270	ENSMUSG00000021745	21.1045	2.19164	40.0174	18.2591	4.19055	0.0130506	0.0830547
Ptprj	19271	ENSMUSG00000025314	25403.8	9669.88	41137.8	4.25422	2.08889	2.45097e-08	1.73298e-06
Ptprq	237523	ENSMUSG00000035916	15.5945	1.20962	29.9793	24.7842	4.63135	0.005411	0.0455466
Ptprs	19280	ENSMUSG00000013236	1378.21	1924.93	831.498	0.431964	-1.21102	0.00238189	0.0249163
Ptprt	19281	ENSMUSG00000053141	18.8614	3.04362	34.6791	11.394	3.51021	0.0109511	0.0743363
Ptpru	19273	ENSMUSG00000028909	28.2165	8.49981	47.9331	5.63932	2.49552	0.0103401	0.0711409
Ptx3	19288	ENSMUSG00000027832	22.9196	1.09582	44.7434	40.831	5.35159	0.0120151	0.0790796
Pvr	52118	ENSMUSG00000040511	659	297.815	1020.18	3.42556	1.77634	8.70539e-06	0.000290007
Pwwp2b	101631	ENSMUSG00000060260	560.267	892.754	227.779	0.255142	-1.97063	1.51137e-06	6.27851e-05
Pxdn	69675	ENSMUSG00000020674	20.4115	0.757578	40.0653	52.8861	5.72482	0.00151907	0.0178174
Pxn	19303	ENSMUSG00000029528	1298.33	1907.97	688.697	0.360958	-1.4701	0.000140745	0.00293749
Pycrl	66194	ENSMUSG00000022571	96.8039	139.622	53.9855	0.386654	-1.37089	0.0161263	0.0944951
Pydc3	100033459	ENSMUSG00000066677	174.778	63.4467	286.109	4.50944	2.17295	0.000337197	0.00573419
Pygb	110078	ENSMUSG00000033059	757.393	1166.79	347.994	0.298249	-1.74541	1.19597e-05	0.000374879
Pzp	11287	ENSMUSG00000030359	14.1056	0.809677	27.4015	33.8425	5.08076	0.0167751	0.0969367
Qdpr	102643271110391	ENSMUSG00000015806	600.043	845.846	354.241	0.418801	-1.25566	0.00187815	0.0208827
Qsox1	104009	ENSMUSG00000033684	239.488	324.952	154.024	0.473992	-1.07707	0.0167644	0.0969367
R3hdm4	109284	ENSMUSG00000035781	387.742	585.369	190.116	0.32478	-1.62247	0.000152836	0.00312582
Rab10	19325	ENSMUSG00000020671	10536.3	4845.43	16227.2	3.34896	1.74371	3.17787e-06	0.000120724
Rab11fip5	52055	ENSMUSG00000051343	1137.78	1766.57	508.99	0.288123	-1.79524	3.81644e-05	0.000990144
Rab1b	76308	ENSMUSG00000024870	655.045	978.155	331.935	0.339348	-1.55916	0.000127207	0.00268404
Rab20	19332	ENSMUSG00000031504	1041.43	332.839	1750.02	5.25785	2.39447	9.51301e-10	9.75112e-08
Rab29	226422	ENSMUSG00000026433	300.887	427.033	174.74	0.409196	-1.28914	0.00673486	0.0532002
Rab32	67844	ENSMUSG00000019832	2905.89	1551.1	4260.69	2.74689	1.4578	0.000165135	0.00331476
Rab3d	19340	ENSMUSG00000019066	367.394	526.071	208.717	0.396747	-1.33371	0.00236627	0.0248129
Rab3gap2	98732	ENSMUSG00000039318	2274.77	3184.21	1365.32	0.428778	-1.2217	0.00145674	0.0173318
Rab3il1	74760	ENSMUSG00000024663	1954.19	3108.94	799.448	0.257145	-1.95935	4.92017e-07	2.44218e-05
Rab40c	224624	ENSMUSG00000025730	214.408	324.512	104.304	0.321418	-1.63748	0.00054738	0.00829595
Rab43	69834	ENSMUSG00000030055	721.788	1026.41	417.164	0.40643	-1.29892	0.00330304	0.0317705
Rab4a	19341	ENSMUSG00000019478	238.905	334.865	142.946	0.426878	-1.2281	0.00889007	0.0642846
Rab6b	270192	ENSMUSG00000032549	229.916	347.048	112.785	0.324983	-1.62157	0.00395056	0.035962
Rab7b	226421	ENSMUSG00000052688	4868.95	8231.88	1506.02	0.18295	-2.45048	3.66618e-10	4.20591e-08
Rabep1	54189	ENSMUSG00000020817	4744.62	3350.01	6139.24	1.83261	0.873897	0.0141644	0.0872269
Rad23a	19358	ENSMUSG00000003813	331.893	487.832	175.954	0.360686	-1.47118	0.000590692	0.00881676
Rad9a	19367	ENSMUSG00000024824	320.753	435.553	205.953	0.472855	-1.08053	0.0123627	0.0804808
Rai14	75646	ENSMUSG00000022246	2523.24	1197.3	3849.18	3.21489	1.68477	3.9887e-05	0.00102669
Ralbp1	19765	ENSMUSG00000024096	1652.14	2196.84	1107.44	0.504106	-0.9882	0.00799561	0.059779
Ralgapa2	241694	ENSMUSG00000037110	3784.26	2181.66	5386.86	2.46915	1.30402	0.00061986	0.00914587
Ralgds	19730	ENSMUSG00000026821	1410.79	633.133	2188.45	3.45655	1.78933	5.31437e-06	0.000190602
Ranbp10	74334	ENSMUSG00000037415	976.722	1363.3	590.149	0.432884	-1.20795	0.00254425	0.0261102
Ranbp2	19386	ENSMUSG00000003226	14344.9	8777.97	19911.7	2.26838	1.18166	0.00124521	0.0154076
Rap1b	215449	ENSMUSG00000052681	13615.6	7240.02	19991.3	2.76121	1.4653	6.80292e-05	0.00160336
Rap2a	76108	ENSMUSG00000051615	2361.66	3390.14	1333.18	0.393251	-1.34648	0.000215083	0.00408989
Rap2c	72065	ENSMUSG00000050029	1483.25	954.389	2012.11	2.10827	1.07606	0.00518137	0.0439769
Rapgef2	76089	ENSMUSG00000062232	1844.63	727.065	2962.2	4.07418	2.02651	1.17287e-07	6.88732e-06
Rapgef4	56508	ENSMUSG00000049044	96.0687	36.2916	155.846	4.29427	2.10241	0.00819778	0.0607751
Rasa2	114713	ENSMUSG00000032413	888.933	531.962	1245.9	2.34209	1.2278	0.00261311	0.0266589
Rasa3	19414	ENSMUSG00000031453	1472.6	2487.98	457.223	0.183773	-2.44401	6.53128e-10	6.98404e-08
Rasef	242505	ENSMUSG00000043003	14.9403	0.97537	28.9053	29.6352	4.88924	0.00969437	0.0681004
Rasgef1a	70727	ENSMUSG00000030134	70.8545	111.637	30.0719	0.269372	-1.89233	0.00567747	0.0470128
Rasgrf1	19417	ENSMUSG00000032356	27.054	3.69054	50.4175	13.6613	3.77202	0.0119367	0.078833
Rasgrp1	19419	ENSMUSG00000027347	476.431	6.51637	946.346	145.226	7.18216	2.42314e-37	2.0988e-33
Rasgrp3	240168	ENSMUSG00000071042	1931.4	3721.17	141.626	0.0380595	-4.7156	2.07975e-27	4.00305e-24
Rassf3	192678	ENSMUSG00000025795	553.221	967.821	138.621	0.14323	-2.80359	7.09562e-11	9.9127e-09
Rassf4	213391	ENSMUSG00000042129	14611	8199.56	21022.5	2.56385	1.35831	8.49912e-05	0.0019096
Rassf5	54354	ENSMUSG00000026430	591.397	809.049	373.746	0.461957	-1.11417	0.00699231	0.0544395
Rbbp8	225182	ENSMUSG00000041238	1056.11	666.697	1445.52	2.16818	1.11649	0.00394881	0.035962
Rbck1	24105	ENSMUSG00000027466	715.17	1044.75	385.59	0.369074	-1.43802	0.000394359	0.0064692
Rbfa	68731	ENSMUSG00000024570	318.499	524.467	112.531	0.214563	-2.22053	1.23159e-06	5.28089e-05
Rbm14	56275	ENSMUSG00000006456	646.1	876.53	415.67	0.474222	-1.07637	0.00638047	0.051361
Rbm26	74213	ENSMUSG00000022119	2285.43	1600.99	2969.87	1.85502	0.891433	0.0167313	0.0968706
Rbm39	170791	ENSMUSG00000027620	7993.63	4469.88	11517.4	2.57667	1.36551	0.000215617	0.00409149
Rbm42	68035	ENSMUSG00000036733	726.871	973.726	480.016	0.492968	-1.02043	0.00850516	0.06243
Rbm7	67010	ENSMUSG00000042396	1374.17	911.087	1837.25	2.01655	1.01189	0.00765549	0.0578408
Rbpj	19664	ENSMUSG00000039191	15603.9	6829.69	24378	3.56941	1.83569	6.89845e-05	0.00161708
Rbpms	19663	ENSMUSG00000031586	88.7584	43.2045	134.312	3.10876	1.63634	0.0148682	0.0899937
Rcbtb1	71330	ENSMUSG00000035469	331.417	467.185	195.65	0.418784	-1.25572	0.00536265	0.0451834
Rcbtb2	105670	ENSMUSG00000022106	1147.34	2041.09	253.593	0.124244	-3.00875	4.39623e-11	6.39966e-09
Rcc2	108911	ENSMUSG00000040945	918.571	1423.64	413.502	0.290454	-1.78362	7.18736e-06	0.00024466
Rcl1	59028	ENSMUSG00000024785	471.384	175.074	767.694	4.38497	2.13257	0.0143434	0.0879525
Rcn1	19672	ENSMUSG00000005973	164.143	77.5486	250.738	3.2333	1.69301	0.000584908	0.00876502
Rcor2	104383	ENSMUSG00000024968	43.5644	14.421	72.7078	5.0418	2.33394	0.00357564	0.0337025
Rdh16	19683	ENSMUSG00000069456	10.1094	0.669831	19.5491	29.185	4.86716	0.0163851	0.095633
Reep4	72549	ENSMUSG00000033589	293.28	400.647	185.914	0.464034	-1.1077	0.0126147	0.0813571
Rel	19696	ENSMUSG00000020275	1847.1	1021.91	2672.29	2.61498	1.3868	0.000454867	0.00722905
Relb	19698	ENSMUSG00000002983	417.074	259.335	574.813	2.21649	1.14827	0.00413219	0.0371414
Rell1	100532	ENSMUSG00000047881	999.444	1572.33	426.563	0.271294	-1.88207	0.000889197	0.0120161
Renbp	19703	ENSMUSG00000031387	803.112	1107.1	499.124	0.450839	-1.14931	0.0039282	0.0358078
Repin1	58887	ENSMUSG00000052751	190.818	289.31	92.3264	0.319126	-1.6478	0.000483966	0.00761467
Reps1	19707	ENSMUSG00000019854	1277.29	657.059	1897.53	2.88791	1.53003	7.02463e-05	0.0016365
Reps2	194590	ENSMUSG00000040855	693.371	1171.78	214.965	0.183452	-2.44653	4.16914e-05	0.00106053
Rere	68703	ENSMUSG00000039852	3087.14	4739.5	1434.77	0.302726	-1.72391	0.000684371	0.00986303
Rest	19712	ENSMUSG00000029249	1808.84	1056.53	2561.14	2.42411	1.27745	0.000551954	0.00835066
Retsat	67442	ENSMUSG00000056666	201.087	280.304	121.87	0.43478	-1.20164	0.0122973	0.0802059
Rfc2	19718	ENSMUSG00000023104	458.449	663.514	253.384	0.381882	-1.3888	0.00110474	0.0141235
Rffl	67338	ENSMUSG00000020696	507.364	139.999	874.729	6.24811	2.64342	1.37084e-07	7.9157e-06
Rfwd2	26374	ENSMUSG00000040782	3637.98	2143.99	5131.98	2.39366	1.25922	0.000800455	0.0111019
Rfx1	19724	ENSMUSG00000031706	301.669	466.298	137.04	0.293889	-1.76666	0.000224734	0.00422242
Rgl1	19731	ENSMUSG00000026482	2173.31	656.728	3689.89	5.6186	2.49021	0.000150385	0.00309398
Rgl2	19732	ENSMUSG00000041354	683.45	1068.3	298.602	0.279511	-1.83902	8.48875e-06	0.000283882
Rgs1	50778	ENSMUSG00000026358	652.61	1034.06	271.159	0.262227	-1.93111	0.0147755	0.089628
Rgs10	67865	ENSMUSG00000030844	3166.38	4191.71	2141.04	0.51078	-0.969226	0.0164555	0.0957215
Rgs18	64214	ENSMUSG00000026357	306.858	480.256	133.461	0.277895	-1.84739	6.63838e-05	0.00156885
Rgs2	19735	ENSMUSG00000026360	1110.38	2102.96	117.795	0.0560136	-4.15808	1.34034e-15	4.46513e-13
Rgs20	58175	ENSMUSG00000002459	30.2183	10.6656	49.771	4.6665	2.22234	0.0136244	0.0852348
Rgs9	19739	ENSMUSG00000020599	67.9044	12.0962	123.713	10.2274	3.35437	0.000921778	0.0123687
Rhbdf2	217344	ENSMUSG00000020806	1627.66	771.706	2483.62	3.21835	1.68632	1.09391e-05	0.000349233
Rhbdl2	230726	ENSMUSG00000043333	14.6176	1.76565	27.4696	15.5578	3.95956	0.00632918	0.0511144
Rhobtb2	246710	ENSMUSG00000022075	94.4214	138.414	50.4288	0.364333	-1.45667	0.0117857	0.0782688
Rhog	56212	ENSMUSG00000073982	1254.6	1656.37	852.827	0.514875	-0.957704	0.00989183	0.0689426
Rhoj	80837	ENSMUSG00000046768	120.259	194.535	45.9827	0.236372	-2.08087	0.000214845	0.00408985
Rhoq	104215	ENSMUSG00000024143	4716.6	1864.29	7568.91	4.05995	2.02146	1.36219e-07	7.89202e-06
Rhou	69581	ENSMUSG00000039960	102.631	14.7853	190.477	12.8829	3.68739	1.14156e-06	4.93929e-05
Rhov	228543	ENSMUSG00000034226	148.898	249.062	48.7329	0.195665	-2.35354	1.2436e-05	0.000385382
Ric1	226089	ENSMUSG00000038658	1867.66	1091.99	2643.33	2.42066	1.2754	0.00414058	0.0371644
Rilpl2	80291	ENSMUSG00000029401	946.923	576.106	1317.74	2.28732	1.19366	0.00131904	0.0161368
Rims2	116838	ENSMUSG00000037386	23.7802	4.52607	43.0344	9.50812	3.24916	0.0107633	0.0732624
Ring1	19763	ENSMUSG00000024325	108.738	155.851	61.6249	0.39541	-1.33858	0.0147767	0.089628
Riok3	66878	ENSMUSG00000024404	7950.83	3321.64	12580	3.7873	1.92117	4.57027e-07	2.28818e-05
Rlf	109263	ENSMUSG00000049878	1783.91	1070.52	2497.3	2.33279	1.22205	0.00165706	0.0190479
Rlim	19820	ENSMUSG00000056537	8097.59	5156.15	11039	2.14094	1.09824	0.00301562	0.0296142
Rmnd5b	66089	ENSMUSG00000001054	439.446	601.397	277.495	0.461418	-1.11585	0.00732252	0.0562519
Rnasel	24014	ENSMUSG00000066800	1591.83	2365.43	818.225	0.34591	-1.53153	8.32947e-05	0.00187886
Rnd1	223881	ENSMUSG00000054855	293.464	23.3141	563.615	24.1748	4.59544	6.57181e-09	5.42111e-07
Rnf123	84585	ENSMUSG00000041528	578.304	801.454	355.154	0.443138	-1.17417	0.00471724	0.0411173
Rnf14	56736	ENSMUSG00000060450	2590.06	1537.85	3642.28	2.36843	1.24393	0.0010371	0.013512
Rnf144b	218215	ENSMUSG00000038068	269.126	510.332	27.9199	0.0547093	-4.19207	1.12607e-05	0.000357926
Rnf149	67702	ENSMUSG00000048234	13731.6	4052.95	23410.3	5.77611	2.5301	0.000117802	0.00251626
Rnf157	217340	ENSMUSG00000052949	232.307	329.444	135.171	0.410299	-1.28525	0.00564454	0.0468521
Rnf166	68718	ENSMUSG00000014470	384.308	614.77	153.846	0.25025	-1.99856	5.34683e-06	0.00019137
Rnf167	70510	ENSMUSG00000040746	441.188	594.772	287.604	0.483554	-1.04825	0.011023	0.0747362
Rnf187	108660	ENSMUSG00000020496	436.78	699.058	174.503	0.249626	-2.00216	2.89569e-06	0.00011172
Rnf19b	75234	ENSMUSG00000028793	2059.44	1233.86	2885.01	2.33819	1.22539	0.0115038	0.0769964
Rnf220	66743	ENSMUSG00000028677	560.26	817.836	302.683	0.370102	-1.434	0.000427945	0.00689608
Rnf26	213211	ENSMUSG00000053128	477.682	691.894	263.469	0.380794	-1.39292	0.00230226	0.0243927
Rnf5	54197	ENSMUSG00000015478	350.458	481.51	219.406	0.455663	-1.13396	0.00900896	0.0648638
Rnh1	107702	ENSMUSG00000038650	7403.45	12527.7	2279.23	0.181936	-2.4585	1.23125e-10	1.59172e-08
[truncated: 749 more rows]

## Sheet: MyD88 Independent DEGs
ID	Entrez ID	Ensembl ID	baseMean	WT_UN	WT_10	foldChange	log2FoldChange	pval	padj	baseMean_1	KO_UN	KO_100	foldChange_1	log2FoldChange_1	pval_1	padj_1
AA467197	433470	ENSMUSG00000033213	1417.26	147.627	2686.89	18.2005	4.18591	1.00897e-08	7.76815e-07	260.309	45.8516	474.766	10.3544	3.37217	1.84743e-08	1.40236e-05
Acsl1	14081	ENSMUSG00000018796	8669.93	1242.99	16096.9	12.9501	3.69489	8.37454e-20	6.04467e-17	2172.7	636.86	3708.54	5.82317	2.5418	6.81926e-07	0.00028347
Adgre5	26364	ENSMUSG00000002885	1933.59	3071.57	795.601	0.259021	-1.94886	0.00989386	0.0689426	1087.38	1801.12	373.644	0.207451	-2.26916	6.95479e-05	0.0139567
Ak4	11639	ENSMUSG00000028527	1556.58	247.674	2865.49	11.5696	3.53227	1.76128e-16	7.44162e-14	292.543	31.8399	553.246	17.3758	4.11901	7.97298e-12	1.74e-08
Arhgap18	73910	ENSMUSG00000039031	1966.73	3503.94	429.519	0.122582	-3.02819	1.41413e-13	3.27511e-11	1032.9	1773.54	292.273	0.164797	-2.60124	3.38524e-06	0.00120618
Birc3	11796	ENSMUSG00000032000	3305.71	817.839	5793.58	7.08401	2.82457	2.68252e-13	5.40341e-11	825.211	376.37	1274.05	3.38511	1.7592	0.000351347	0.0515476
Bnip3	12176	ENSMUSG00000078566	1777.64	646.038	2909.24	4.50321	2.17095	9.19649e-08	5.66942e-06	417.356	164.936	669.776	4.06082	2.02177	0.000214724	0.0340806
C3	12266	ENSMUSG00000024164	13942.8	2273.25	25612.4	11.2668	3.49401	3.43737e-17	1.56699e-14	2955.17	1360.64	4549.71	3.3438	1.74149	0.000295742	0.0445117
Cav1	12389	ENSMUSG00000007655	4809.32	1048.71	8569.92	8.17187	3.03067	9.76645e-05	0.00213887	3693.39	652.976	6733.8	10.3125	3.36632	9.8796e-09	8.24164e-06
Ccl22	20299	ENSMUSG00000031779	216.569	20.5834	412.554	20.043	4.32503	1.50339e-11	2.32528e-09	115.389	34.3245	196.454	5.72344	2.51688	7.53636e-05	0.014784
Ccl9	20308	ENSMUSG00000019122	56204.7	8826.54	103583	11.7354	3.55279	0.00124495	0.0154076	5051.42	1824.22	8278.62	4.53818	2.18211	2.68523e-05	0.00666334
Cd14	12475	ENSMUSG00000051439	6932.71	1708.88	12156.5	7.11374	2.83061	2.29661e-13	4.85172e-11	1352.94	362.909	2342.97	6.45608	2.69066	0.000400517	0.0568507
Cd69	12515	ENSMUSG00000030156	641.617	16.6095	1266.62	76.2591	6.25284	2.58385e-09	2.35579e-07	38.0779	6.81927	69.3366	10.1678	3.34593	0.000269933	0.0413401
Cebpb	12608	ENSMUSG00000056501	2047.89	464.639	3631.15	7.81499	2.96624	1.53814e-13	3.46042e-11	475.071	163.848	786.294	4.79893	2.26271	1.99122e-05	0.00543198
Chn2	69993	ENSMUSG00000004633	269.75	455.796	83.7042	0.183644	-2.44502	2.80188e-07	1.47082e-05	168.198	286.322	50.0751	0.174891	-2.51547	0.00034088	0.0504358
Clec4d	17474	ENSMUSG00000030144	23185.4	7731.28	38639.6	4.99782	2.3213	1.72641e-09	1.68076e-07	15654.3	5495.07	25813.5	4.69757	2.23192	8.03847e-06	0.00250614
Clec4e	56619	ENSMUSG00000030142	22721.6	616.952	44826.2	72.6574	6.18304	3.5618e-44	6.1701e-40	14335.9	245.77	28426	115.661	6.85376	3.42029e-29	5.97148e-25
Clec5a	23845	ENSMUSG00000029915	4153.62	891.022	7416.21	8.32327	3.05715	1.05688e-14	3.0514e-12	1578.98	440.814	2717.14	6.16392	2.62385	4.20746e-07	0.000188354
Clmp	71566	ENSMUSG00000032024	247.793	44.1369	451.449	10.2284	3.35451	0.00051323	0.00788181	250.766	30.1424	471.39	15.6388	3.96705	4.59824e-10	5.73434e-07
Cxcl2	20310	ENSMUSG00000058427	4832.29	80.7584	9583.83	118.673	6.89085	2.93629e-13	5.84659e-11	124.847	20.9817	228.713	10.9006	3.44633	1.63174e-07	8.90267e-05
Cxcl3	330122	ENSMUSG00000029379	3803.18	16.7781	7589.58	452.35	8.82129	1.1999e-05	0.000374879	151.555	17.0936	286.016	16.7324	4.06457	2.34188e-09	2.55543e-06
Dst	13518	ENSMUSG00000026131	20440.2	2282.29	38598.1	16.912	4.07997	2.38546e-13	4.97871e-11	4764.11	1327.25	8200.98	6.17891	2.62735	1.78088e-07	9.42193e-05
Ednrb	13618	ENSMUSG00000022122	1665.12	205.32	3124.92	15.2198	3.92788	0.000567747	0.00854996	412.763	97.4921	728.035	7.46763	2.90065	1.13271e-07	6.59201e-05
Egln3	112407	ENSMUSG00000035105	409.94	177.889	641.99	3.60894	1.85157	0.000295543	0.00520822	177.672	48.1447	307.199	6.38074	2.67372	7.36208e-06	0.00233699
Ehd4	98878	ENSMUSG00000027293	3156.98	4947.23	1366.73	0.276262	-1.85589	1.4728e-06	6.14778e-05	1304.56	2116.06	493.056	0.233007	-2.10156	0.000182468	0.0294974
Ero1l	50527	ENSMUSG00000021831	5680.85	1402.72	9958.99	7.09977	2.82777	7.95581e-13	1.53132e-10	1975.66	801.76	3149.56	3.92831	1.97391	0.000227202	0.0357362
Ets2	23872	ENSMUSG00000022895	6341.66	751.395	11931.9	15.8797	3.98911	4.10004e-22	3.73815e-19	708.868	248.165	1169.57	4.71287	2.23661	1.41606e-05	0.00426258
Fabp3	14077	ENSMUSG00000028773	1444.49	361.41	2527.57	6.99364	2.80604	0.0011213	0.0142512	918.049	371.353	1464.75	3.94435	1.97979	0.000145352	0.0246379
Fas	14102	ENSMUSG00000024778	929.389	68.8699	1789.91	25.9897	4.69987	1.09227e-25	1.57679e-22	205.011	38.2977	371.723	9.70616	3.2789	9.10202e-08	5.47973e-05
Fmnl2	71409	ENSMUSG00000036053	2312.27	619.214	4005.32	6.46839	2.69341	1.52914e-11	2.34419e-09	1303.24	409.345	2197.13	5.36742	2.42423	4.87552e-06	0.00161371
Fzd1	14362	ENSMUSG00000044674	719.277	29.4493	1409.1	47.8485	5.5804	4.47515e-09	3.87615e-07	204.819	60.5439	349.094	5.76596	2.52756	2.89722e-05	0.00683548
Gas6	14456	ENSMUSG00000031451	3580.46	5988.69	1172.22	0.19574	-2.35299	1.72704e-09	1.68076e-07	1275.24	2095.46	455.017	0.217144	-2.20328	0.000100992	0.0181775
Gbp2	14469	ENSMUSG00000028270	6291.55	446.448	12136.7	27.1849	4.76473	4.02127e-30	1.39321e-26	738.86	147.804	1329.92	8.99782	3.16958	3.41496e-09	3.50716e-06
Gbp2b	14468	ENSMUSG00000040264	2325.4	78.8795	4571.91	57.9607	5.857	7.8309e-19	4.84481e-16	141.597	32.333	250.861	7.75867	2.95581	9.6713e-05	0.0177738
Gca	227960	ENSMUSG00000026893	110.351	54.0259	166.676	3.08511	1.62532	0.00269965	0.0274126	123.026	42.3733	203.678	4.80675	2.26506	0.00057817	0.0742226
Gem	14579	ENSMUSG00000028214	117.5	11.212	223.788	19.9596	4.31901	2.25825e-12	3.83526e-10	140.964	16.1365	265.791	16.4714	4.04189	2.27566e-09	2.55543e-06
Gpr155	68526	ENSMUSG00000041762	305.666	546.997	64.3343	0.117614	-3.08787	3.35216e-05	0.000890636	240.09	396.398	83.7826	0.21136	-2.24223	0.000502303	0.0669444
Gsap	212167	ENSMUSG00000039934	3895.2	902.038	6888.36	7.63644	2.9329	4.11266e-14	1.0477e-11	1905.49	564.658	3246.32	5.74919	2.52336	1.67224e-06	0.000663537
Gyg	27357	ENSMUSG00000019528	1964.45	3211.44	717.459	0.223407	-2.16225	0.00187762	0.0208827	1306.77	2127.22	486.314	0.228615	-2.12901	0.00016168	0.0268835
H2-M2	14990	ENSMUSG00000016283	443.31	22.8941	863.726	37.727	5.23752	3.55499e-25	4.73716e-22	852.017	39.4655	1664.57	42.1778	5.39841	2.3142e-19	1.34679e-15
Hif1a	15251	ENSMUSG00000021109	13567.7	2765.93	24369.5	8.81062	3.13924	5.69379e-08	3.6531e-06	4550.63	1643.68	7457.57	4.53713	2.18178	1.84103e-05	0.00518427
Hpgd	15446	ENSMUSG00000031613	555.901	1077.37	34.4298	0.0319572	-4.96772	0.0038189	0.035092	531.109	965.915	96.302	0.0997003	-3.32626	9.9132e-09	8.24164e-06
Ifi203	1.00504e+22	ENSMUSG00000039997	5615.43	1252.71	9978.14	7.96521	2.99371	0.00136175	0.0165309	1711.11	626.596	2795.63	4.46161	2.15757	2.74793e-05	0.00666334
Ifi205	226695	ENSMUSG00000054203	2182.62	71.9175	4293.32	59.6978	5.89961	1.50754e-17	8.42423e-15	220.814	46.3098	395.318	8.53637	3.09362	4.41447e-07	0.00019268
Ift57	73916	ENSMUSG00000032965	1415.94	456.882	2374.99	5.19826	2.37803	3.2487e-09	2.91592e-07	609.911	267.403	952.419	3.56174	1.83258	0.000501645	0.0669444
Il1rn	16181	ENSMUSG00000026981	25738.1	1183.4	50292.7	42.4986	5.40934	4.32231e-05	0.00109359	1048.99	446.888	1651.08	3.69462	1.88543	0.000238752	0.0372176
Irg1	16365	ENSMUSG00000022126	60163.5	567.853	119759	210.898	7.7204	2.72215e-28	6.73654e-25	12197.4	220.964	24173.8	109.402	6.77349	1.05059e-18	4.58555e-15
Itga1	109700	ENSMUSG00000042284	249.381	29.4472	469.315	15.9375	3.99436	0.00332109	0.0318556	129.172	28.6672	229.676	8.0118	3.00213	1.88249e-06	0.000730364
Jag1	16449	ENSMUSG00000027276	1661.19	561.005	2761.38	4.92221	2.29931	0.000263887	0.00479173	1339.86	302.05	2377.67	7.87178	2.97669	1.92902e-08	1.40328e-05
Jdp2	81703	ENSMUSG00000034271	1187.61	116.266	2258.96	19.4292	4.28016	0.00043524	0.00697998	155.253	59.641	250.864	4.20624	2.07253	0.000591826	0.0754211
Kctd12b	207474	ENSMUSG00000041633	579.068	1014.78	143.356	0.141269	-2.82349	0.000430636	0.00692014	593.629	922.426	264.831	0.287103	-1.80036	0.000638668	0.0808008
Lancl3	236285	ENSMUSG00000047344	268.911	43.6992	494.124	11.3074	3.49919	1.64471e-08	1.21758e-06	65.4967	18.8028	112.191	5.96671	2.57693	0.000506546	0.0669984
Lmo4	16911	ENSMUSG00000028266	4650.23	1393.33	7907.13	5.67498	2.50462	7.58956e-11	1.03523e-08	1638.1	754.54	2521.66	3.34198	1.7407	0.000802688	0.0959872
Lpin1	14245	ENSMUSG00000020593	327.699	592.212	63.1861	0.106695	-3.22844	7.80314e-07	3.57602e-05	250.147	416.03	84.2629	0.20254	-2.30372	0.000210565	0.0337271
Lztfl1	93730	ENSMUSG00000025245	6238.25	714.117	11762.4	16.4712	4.04188	3.28351e-17	1.5373e-14	2341.43	741.17	3941.68	5.31819	2.41093	6.50009e-05	0.0131959
Malt1	240354	ENSMUSG00000032688	7875.2	693.354	15057	21.7162	4.4407	8.92764e-23	9.66585e-20	1977.77	541.675	3413.87	6.30243	2.65591	2.73703e-07	0.000132738
Met	17295	ENSMUSG00000009376	1054.27	53.5522	2054.98	38.3735	5.26204	0.00109426	0.0140414	515.105	33.9822	996.228	29.3161	4.87362	4.97723e-16	1.44829e-12
Mmp13	17386	ENSMUSG00000050578	29848.5	373.523	59323.5	158.822	7.31126	0.000319307	0.00552583	865.232	127.528	1602.94	12.5693	3.65183	4.55704e-11	6.73175e-08
Mmp14	17387	ENSMUSG00000000957	1927.94	57.2344	3798.65	66.37	6.05246	7.25657e-06	0.000246482	537.042	45.5984	1028.49	22.5553	4.4954	4.6269e-11	6.73175e-08
Mnda	381308	ENSMUSG00000026536	1408.77	270.796	2546.75	9.40467	3.23338	1.86091e-15	6.08238e-13	239.122	74.2616	403.982	5.43999	2.4436	2.33958e-05	0.00600687
Ms4a6d	68774	ENSMUSG00000024679	14699.6	2431.33	26967.8	11.0918	3.47142	2.53923e-18	1.46624e-15	4249.18	1871.31	6627.06	3.5414	1.82432	0.00057223	0.0740042
Msantd3	66665	ENSMUSG00000039693	149.352	12.6387	286.066	22.6342	4.50043	0.00185597	0.0206758	91.0855	10.2743	171.897	16.7307	4.06443	4.53374e-08	3.16619e-05
Msr1	20288	ENSMUSG00000025044	23828.3	4294.64	43361.9	10.0967	3.33582	8.58087e-17	3.71616e-14	5219.52	2353.57	8085.47	3.4354	1.78048	0.000459685	0.063194
Nfkbia	18035	ENSMUSG00000021025	7788.97	1541.77	14036.2	9.10393	3.18649	5.17895e-16	1.9352e-13	1068.04	341.988	1794.09	5.24606	2.39123	3.48563e-06	0.00121711
Olr1	108078	ENSMUSG00000030162	372.968	11.6377	734.299	63.0967	5.97949	1.54179e-27	3.33856e-24	168.815	15.5043	322.125	20.7765	4.37688	2.62923e-11	4.59037e-08
Orai2	269717	ENSMUSG00000039747	1716.25	502.6	2929.89	5.82948	2.54337	2.2309e-10	2.68374e-08	505.799	209.898	801.7	3.81947	1.93337	0.000170868	0.0281433
Pde4b	18578	ENSMUSG00000028525	3933.21	198.136	7668.29	38.7022	5.27434	6.17709e-34	3.56686e-30	380.396	88.1283	672.664	7.63278	2.93221	2.06328e-07	0.000105949
Pfkl	18641	ENSMUSG00000020277	3480.97	1608.48	5353.47	3.32828	1.73478	1.01624e-05	0.000329382	1002.07	458.032	1546.1	3.37554	1.75512	0.000444133	0.0615406
Pla2g4a	18783	ENSMUSG00000056220	4441.18	659.565	8222.8	12.467	3.64004	1.6983e-18	1.01447e-15	739.072	254.133	1224.01	4.81641	2.26796	8.55874e-05	0.0164205
Plpp3	67916	ENSMUSG00000028517	452.072	140.115	764.028	5.45286	2.44701	5.99957e-09	4.99666e-07	450.375	141.903	758.847	5.34765	2.4189	6.18731e-06	0.00200045
Prkar2b	19088	ENSMUSG00000002997	1286.06	584.428	1987.7	3.4011	1.766	0.000856138	0.0116617	1137.79	327.421	1948.15	5.95	2.57289	1.58119e-05	0.00460099
Procr	19124	ENSMUSG00000027611	1732.79	104.461	3361.12	32.1759	5.00791	0.00168907	0.0193158	311.346	62.224	560.467	9.00725	3.17109	4.0721e-07	0.000187091
Pstpip2	19201	ENSMUSG00000025429	3481.75	614.439	6349.06	10.3331	3.3692	2.96335e-17	1.46669e-14	1015.19	374.485	1655.89	4.42178	2.14463	2.26884e-05	0.00591219
Ptges	64292	ENSMUSG00000050737	4102.47	81.7892	8123.15	99.3182	6.63399	6.59782e-07	3.0807e-05	383.43	33.5433	733.316	21.8618	4.45034	0.000739945	0.0897132
Ptgs2	19225	ENSMUSG00000032487	26842.6	153.753	53531.4	348.164	8.44362	1.00389e-08	7.76815e-07	200.265	68.2911	332.239	4.86504	2.28245	0.000129722	0.0224239
Rab11fip1	75767	ENSMUSG00000031488	2342.76	269.944	4415.58	16.3573	4.03187	1.29381e-05	0.000398802	373.383	141.998	604.768	4.25899	2.09051	8.87213e-05	0.0168313
Rnf150	330812	ENSMUSG00000047747	1208.25	2251.6	164.894	0.0732339	-3.77135	4.28125e-19	2.85247e-16	752.519	1340.36	164.674	0.122858	-3.02494	6.5801e-07	0.0002802
Rtp4	67775	ENSMUSG00000033355	5680.41	2023.77	9337.04	4.6137	2.20592	0.00208864	0.0225463	2028.78	834.309	3223.25	3.86337	1.94986	0.000287337	0.0436228
Saa3	20210	ENSMUSG00000040026	58807.7	911.408	116704	128.048	7.00054	1.26732e-06	5.42069e-05	1050.27	284.27	1816.28	6.38926	2.67565	0.000103277	0.0183992
Sema3c	20348	ENSMUSG00000028780	136.489	35.5108	237.467	6.68717	2.7414	0.000337093	0.00573419	104.369	29.6185	179.12	6.04758	2.59636	8.96562e-05	0.0168313
Serpinb9b	20706	ENSMUSG00000021403	108.57	48.8003	168.339	3.44955	1.78641	0.00639818	0.0514319	336.158	30.4731	641.842	21.0626	4.39661	5.08159e-13	1.26742e-09
Sgsh	27029	ENSMUSG00000005043	731.651	1403.28	60.0239	0.0427741	-4.54712	9.05479e-07	4.07418e-05	299.264	503.671	94.8568	0.188331	-2.40866	5.21485e-05	0.0111032
Slamf8	74748	ENSMUSG00000053318	429.368	147.115	711.621	4.83719	2.27417	8.90831e-09	7.04651e-07	167.582	49.1501	286.015	5.81921	2.54082	3.28726e-05	0.0076523
Slc26a11	268512	ENSMUSG00000039908	308.979	573.399	44.5586	0.0777095	-3.68576	0.000344767	0.00582672	235.651	403.409	67.8929	0.168298	-2.57091	2.19595e-05	0.00589832
Slc7a11	26570	ENSMUSG00000027737	19501.5	183.729	38819.3	211.285	7.72305	0.000290913	0.00515038	3796.07	174.578	7417.56	42.4884	5.409	3.37712e-21	2.94806e-17
Sod2	20656	ENSMUSG00000006818	17839.9	1912.97	33766.9	17.6515	4.14172	5.88313e-24	6.79423e-21	3518.28	639.77	6396.79	9.99857	3.32172	2.54054e-10	3.41194e-07
Spic	20728	ENSMUSG00000004359	378.022	23.7855	732.259	30.786	4.9442	0.00030216	0.00530864	167.382	22.2636	312.5	14.0364	3.8111	8.98044e-09	8.24164e-06
Tarm1	245126	ENSMUSG00000053338	1110.33	10.4604	2210.21	211.294	7.72311	9.80372e-09	7.68461e-07	117.386	8.94992	225.822	25.2317	4.65717	2.66163e-05	0.00666334
Tma16	66282	ENSMUSG00000025591	2688.53	205.048	5172	25.2234	4.65669	3.78444e-09	3.34479e-07	316.235	85.9686	546.501	6.35698	2.66834	0.000708345	0.0873339
Tmem154	320782	ENSMUSG00000056498	437.31	805.157	69.4636	0.0862735	-3.53494	1.79767e-12	3.17765e-10	399.607	687.986	111.229	0.161673	-2.62885	4.89872e-06	0.00161371
Tnfaip3	21929	ENSMUSG00000019850	10165.9	720.579	19611.1	27.2158	4.76637	3.46507e-15	1.09137e-12	860.67	261.432	1459.91	5.58426	2.48137	0.000176837	0.0288542
Tpcn1	252972	ENSMUSG00000032741	2139.79	3734.29	545.289	0.146022	-2.77574	2.47326e-10	2.93454e-08	942.974	1538.3	347.645	0.225992	-2.14566	0.000132827	0.0227355
Traf1	22029	ENSMUSG00000026875	1944.78	155.751	3733.81	23.9729	4.58333	9.41669e-27	1.63125e-23	272.647	80.646	464.647	5.76157	2.52646	0.000243674	0.0376486
Txnrd1	50493	ENSMUSG00000020250	13358.5	3248.52	23468.6	7.2244	2.85288	0.00127428	0.0157001	7214.3	1851.21	12577.4	6.79415	2.76429	6.65452e-08	4.30301e-05
Vcan	13003	ENSMUSG00000021614	5210.4	140.919	10279.9	72.9487	6.18881	1.12901e-07	6.69788e-06	683.753	168.067	1199.44	7.13668	2.83525	1.47111e-07	8.28517e-05
Vegfc	22341	ENSMUSG00000031520	75.8876	16.5541	135.221	8.16845	3.03006	0.00739804	0.0564925	56.34	10.1177	102.562	10.1369	3.34154	9.12817e-05	0.0169541
Wwp1	107568	ENSMUSG00000041058	8653.25	14221.1	3085.35	0.216955	-2.20453	8.10322e-08	5.08595e-06	8205.39	13516.4	2894.35	0.214136	-2.2234	0.000358416	0.0521466
Zdhhc14	224454	ENSMUSG00000034265	685.947	1154.83	217.06	0.187957	-2.41152	1.15159e-07	6.78539e-06	539.214	849.711	228.717	0.26917	-1.89341	0.000517359	0.0679141
Zeb1	21417	ENSMUSG00000024238	381.184	68.4117	693.957	10.1438	3.34253	4.91168e-05	0.00122249	190.972	63.185	318.759	5.04485	2.33481	0.000107092	0.0188861

## Sheet: MyD88 Privative DEGs
ID	Entrez ID	Ensembl ID	baseMean	KO_UN	KO_100	foldChange	log2FoldChange	pval	padj
Aph1c	68318	ENSMUSG00000053040	821.389	1307.17	335.609	0.256745	-1.96159	0.000374257	0.0538151
Atp2b4	381290	ENSMUSG00000026463	265.756	99.6071	431.905	4.33609	2.11639	0.00052236	0.0680589
B3gnt5	108105	ENSMUSG00000022686	167.076	54.3975	279.755	5.14279	2.36255	7.49725e-05	0.014784
Ccr1	12768	ENSMUSG00000025804	217.953	67.0674	368.839	5.49953	2.45931	6.43774e-05	0.0131959
Cd24a	12484	ENSMUSG00000047139	4779.23	1691.55	7866.9	4.65071	2.21745	1.50876e-05	0.00446464
Cmpk2	22169	ENSMUSG00000020638	270.922	92.1171	449.726	4.88211	2.2875	3.78687e-05	0.00847627
Cxcl10	15945	ENSMUSG00000034855	466.655	26.639	906.671	34.0354	5.08897	4.3957e-17	1.53489e-13
Dcstamp	75766	ENSMUSG00000022303	59.1496	10.4425	107.857	10.3286	3.36857	1.90106e-05	0.00526834
Dusp4	319520	ENSMUSG00000031530	855.059	237.649	1472.47	6.19597	2.63133	2.5666e-06	0.000953411
Fads2	56473	ENSMUSG00000024665	133.936	43.4928	224.38	5.15901	2.36709	0.000124347	0.0217098
Gclc	14629	ENSMUSG00000032350	1657.63	518.191	2797.06	5.39774	2.43236	2.55375e-06	0.000953411
Gclm	14630	ENSMUSG00000028124	2562.53	680.272	4444.79	6.53384	2.70793	2.39533e-07	0.000119486
Gpr141	353346	ENSMUSG00000053101	360.74	143.673	577.808	4.0217	2.0078	0.000160352	0.0268835
Gpr68	238377	ENSMUSG00000047415	163.976	49.6431	278.308	5.60618	2.48702	2.71584e-05	0.00666334
Gsta3	14859	ENSMUSG00000025934	119.994	26.2001	213.787	8.15978	3.02853	3.2934e-06	0.00119791
Hspa1a	193740	ENSMUSG00000091971	181.312	66.0155	296.609	4.49303	2.16769	0.000404548	0.0569597
Hspa1b	15511	ENSMUSG00000090877	282.407	46.2248	518.588	11.2188	3.48785	1.31377e-08	1.04259e-05
Ifit1	15957	ENSMUSG00000034459	780.223	267.129	1293.32	4.84154	2.27547	2.82837e-05	0.00676445
Ifit2	15958	ENSMUSG00000045932	778.326	282.594	1274.06	4.50843	2.17263	1.61258e-05	0.0046154
Ifit3	15959	ENSMUSG00000074896	599.515	190.771	1008.26	5.28518	2.40195	0.000757718	0.0912345
Ifit3b	667370	ENSMUSG00000062488	74.3469	22.0587	126.635	5.74083	2.52126	0.000305897	0.0456467
Layn	244864	ENSMUSG00000060594	271.677	56.5532	486.8	8.60781	3.10565	7.55301e-08	4.70957e-05
Lox	16948	ENSMUSG00000024529	163.899	12.8922	314.905	24.426	4.61034	1.1653e-11	2.26056e-08
Lrp8	16975	ENSMUSG00000028613	298.613	127.758	469.468	3.67466	1.87761	0.000734711	0.0897015
Maf	17132	ENSMUSG00000055435	1480.47	2399.5	561.443	0.233984	-2.09552	4.71145e-05	0.0101552
Me1	17436	ENSMUSG00000032418	229.367	96.1637	362.571	3.77035	1.9147	0.000473807	0.0646266
Mt1	17748	ENSMUSG00000031765	571.338	929.373	213.303	0.229513	-2.12336	0.000420844	0.0587802
Ndrg1	17988	ENSMUSG00000005125	299.341	486.493	112.189	0.230608	-2.11649	0.000701983	0.0873339
Pdpn	14726	ENSMUSG00000028583	659.861	126.573	1193.15	9.42659	3.23674	0.000710316	0.0873339
Ppfibp1	67533	ENSMUSG00000016487	3900.03	1748.47	6051.59	3.46108	1.79122	0.000488573	0.066124
Prdx1	18477	ENSMUSG00000028691	14472.1	6045.05	22899.3	3.7881	1.92147	6.30532e-05	0.0131053
Serpinb9	20723	ENSMUSG00000045827	818.626	166.73	1470.52	8.81976	3.14074	9.43252e-09	8.24164e-06
Sgk1	20393	ENSMUSG00000019970	2978.01	1083.21	4872.8	4.49846	2.16943	1.23625e-05	0.0037866
Siglech	233274	ENSMUSG00000051504	530.596	212.78	848.413	3.98728	1.9954	9.80634e-05	0.0178343
Spint1	20732	ENSMUSG00000027315	93.2244	28.5164	157.932	5.53829	2.46944	0.000376049	0.0538151
Thbs1	21825	ENSMUSG00000040152	2158.36	674.642	3642.08	5.39854	2.43257	3.61945e-05	0.00820675
Tmeff1	230157	ENSMUSG00000028347	171.446	49.1751	293.717	5.97287	2.57843	2.2461e-05	0.00591219
