# Supplementary material for: Macrophage mediated recognition and clearance of Borrelia burgdorferi elicits MyD88-dependent and -independent phagosomal signals that contribute to phagocytosis and inflammation
Source: BMC Immunol. 2021 May 17;22:32. doi: 10.1186/s12865-021-00418-8 (PMC8127205; doi:10.1186/s12865-021-00418-8)
Supplement: Supplementary file 5 — Additional file 5: Supplemental File 5. Identified transcription factors. [file 12865_2021_418_MOESM5_ESM.xlsx]

## Sheet: MyD88 Dependent TF
ID	Ensembl ID	Gene description	Species	Site model ID	Yes density per 1000bp	No density per 1000bp	Yes-No ratio	P-value	baseMean	WT_UN	WT_10	foldChange	log2FoldChange	pval	padj
Bbx	ENSMUSG00000022641	bobby sox homolog (Drosophila)	Mus musculus	V$BBX_03	0.115045	0.0333333	3.45135	0.000260806	3676.74	3258.82	4094.66	1.25649	0.329396	0.489221	0.647077
Bcl6	ENSMUSG00000022508	B cell leukemia/lymphoma 6	Mus musculus	V$BCL6_02	0.328957	0.188889	1.74154	0.000466505	3315.81	4210.6	2421.01	0.57498	-0.798415	0.0216996	0.112287
Cbfb	ENSMUSG00000031885	core binding factor beta	Mus musculus	V$COREBINDINGFACTOR_Q6	1.05638	0.8	1.32047	0.000510768	1519.68	1441.35	1598.01	1.10869	0.14886	0.748614	0.847277
Dmrt2	ENSMUSG00000048138	doublesex and mab-3 related transcription factor 2	Mus musculus	V$DMRT2_01	0.347532	0.211111	1.64621	0.000940919	6.03439	2.73142	9.33736	3.41849	1.77336	0.393932	0.563788
Egr2	ENSMUSG00000037868	early growth response 2	Mus musculus	V$EGR2_05	0.390075	0.222222	1.75534	0.000123527	239.887	218.448	261.327	1.19629	0.258563	0.675456	0.795472
Foxc1	ENSMUSG00000050295	forkhead box C1	Mus musculus	V$FOXC1_06	0.123434	0.0555556	2.22181	0.00444603	8.65662	1.67125	15.642	9.35944	3.22642	0.092099	0.24042
Foxf2	ENSMUSG00000038402	forkhead box F2	Mus musculus	V$FOX_Q2	0.176163	0.0944444	1.86525	0.00458279	5.15189	0.913674	9.39011	10.2773	3.36139	0.191223	0.360845
Foxg1	ENSMUSG00000020950	forkhead box G1	Mus musculus	V$FOXG1_05	0.102462	0.0611111	1.67665	0.0531979	9.9442	2.19164	17.6968	8.07467	3.0134	0.10844	0.26163
Foxi1	ENSMUSG00000047861	forkhead box I1	Mus musculus	V$HFH3_01	0.339743	0.211111	1.60931	0.00159571	4.70629	1.52181	7.89077	5.18513	2.37438	0.320913	0.49428
Foxj2	ENSMUSG00000003154	forkhead box J2	Mus musculus	V$FOXJ2_06	0.224698	0.116667	1.92598	0.000954027	877.018	1171.52	582.512	0.497226	-1.00803	0.00992806	0.0690975
Foxj3	ENSMUSG00000032998	forkhead box J3	Mus musculus	V$FOXJ3_12	0.224698	0.116667	1.92598	0.000954027	1010.65	1122.3	898.996	0.80103	-0.320072	0.379665	0.550279
Foxk1	ENSMUSG00000056493	forkhead box K1	Mus musculus	V$FOXK1_07	0.102462	0.0611111	1.67665	0.0531979	480.286	693.751	266.821	0.384606	-1.37855	0.000930487	0.0124669
Foxo1	ENSMUSG00000044167	forkhead box O1	Mus musculus	V$FOXO1_01	0.210916	0.111111	1.89824	0.00161868	278.313	365.689	190.937	0.52213	-0.93752	0.0326442	0.141092
Foxo4	ENSMUSG00000042903	forkhead box O4	Mus musculus	V$FOXO4_01	0.17077	0.0833333	2.04924	0.00200031	271.749	430.663	112.835	0.262002	-1.93235	2.37004e-05	0.000662653
Foxp3	ENSMUSG00000039521	forkhead box P3	Mus musculus	V$FOXP3_01	0.224698	0.116667	1.92598	0.000954027	40.3694	44.4532	36.2856	0.816266	-0.292889	0.716018	0.824926
Gata3	ENSMUSG00000015619	GATA binding protein 3	Mus musculus	V$GATA3_05	0.234285	0.122222	1.91687	0.000799688	5.53407	2.39318	8.67495	3.62486	1.85793	0.427742	0.59321
Hnf4a	ENSMUSG00000017950	alpha,hepatic nuclear factor 4	Mus musculus	V$HNF4A_02	0.128827	0.0611111	2.10807	0.00558484	11.8742	0.243843	23.5046	96.3926	6.59085	0.00361553	0.0338663
Irf1	ENSMUSG00000018899	interferon regulatory factor 1	Mus musculus	V$IRF_Q6	0.554853	0.388889	1.42677	0.00161805	2106.49	1082.7	3130.28	2.89118	1.53166	0.0628344	0.197912
Irf2	ENSMUSG00000031627	interferon regulatory factor 2	Mus musculus	V$IRF_Q6	0.554853	0.388889	1.42677	0.00161805	2310.19	2113.87	2506.5	1.18574	0.245788	0.48097	0.640124
Irf3	ENSMUSG00000003184	interferon regulatory factor 3	Mus musculus	V$IRF_Q6	0.554853	0.388889	1.42677	0.00161805	361.895	486.971	236.818	0.486308	-1.04006	0.0141092	0.0870111
Irf4	ENSMUSG00000021356	interferon regulatory factor 4	Mus musculus	V$IRF_Q6	0.554853	0.388889	1.42677	0.00161805	80.0546	81.4357	78.6734	0.966081	-0.0497844	0.88132	0.935255
Irf5	ENSMUSG00000029771	interferon regulatory factor 5	Mus musculus	V$IRF_Q6	0.554853	0.388889	1.42677	0.00161805	2527.28	3844	1210.57	0.314925	-1.66692	1.20321e-05	0.000374879
Irf7	ENSMUSG00000025498	interferon regulatory factor 7	Mus musculus	V$IRF_Q6	0.554853	0.388889	1.42677	0.00161805	975.827	713.688	1237.97	1.7346	0.794605	0.251427	0.42594
Irf8	ENSMUSG00000041515	interferon regulatory factor 8	Mus musculus	V$IRF_Q6	0.554853	0.388889	1.42677	0.00161805	1355.81	1957.14	754.473	0.385497	-1.37521	0.000269025	0.0048545
Irf9	ENSMUSG00000002325	interferon regulatory factor 9	Mus musculus	V$IRF_Q6_01	0.695664	0.494444	1.40696	0.000698865	506.736	539.396	474.076	0.878902	-0.186225	0.699668	0.811593
Klf4	ENSMUSG00000003032	Kruppel-like factor 4 (gut)	Mus musculus	V$GKLF_Q4	1.08095	0.872222	1.2393	0.00457472	136.165	179.96	92.3704	0.513282	-0.962176	0.0735134	0.214462
Lhx3	ENSMUSG00000026934	LIM homeobox protein 3	Mus musculus	V$LHX3_01	0.42363	0.266667	1.58861	0.000607637	6.3068	2.36713	10.2465	4.32865	2.11392	0.35073	0.524174
Mecom	ENSMUSG00000027684	MDS1 and EVI1 complex locus	Mus musculus	V$EVI1_01	0.490739	0.338889	1.44808	0.00208835	15.8638	1.09582	30.6317	27.9533	4.80494	0.00302792	0.0296846
Nhlh1	ENSMUSG00000051251	nescient helix loop helix 1	Mus musculus	V$HEN1_02	1.94019	1.55556	1.24726	0.000146706	5.64542	0.425989	10.8648	25.505	4.67271	0.0661792	0.20351
Nr1h3	ENSMUSG00000002108	group H,member 3,nuclear receptor subfamily 1	Mus musculus	V$PXR_Q2	0.118041	0.0333333	3.54123	0.000180278	367.972	347.692	388.251	1.11665	0.159182	0.617427	0.75184
Nr1h4	ENSMUSG00000047638	group H,member 4,nuclear receptor subfamily 1	Mus musculus	V$PXR_Q2	0.118041	0.0333333	3.54123	0.000180278	5.89588	0.757578	11.0342	14.5651	3.86444	0.129023	0.287824
Nr1i2	ENSMUSG00000022809	group I,member 2,nuclear receptor subfamily 1	Mus musculus	V$PXR_Q2	0.118041	0.0333333	3.54123	0.000180278	7.80722	1.91509	13.6994	7.15336	2.83862	0.286673	0.461271
Nr1i3	ENSMUSG00000005677	group I,member 3,nuclear receptor subfamily 1	Mus musculus	V$PXR_Q2	0.118041	0.0333333	3.54123	0.000180278	6.56586	6.82191	6.3098	0.924932	-0.11258	1	1
Nr2f2	ENSMUSG00000030551	group F,member 2,nuclear receptor subfamily 2	Mus musculus	V$HNF4_Q6	0.11864	0.0277778	4.27105	4.77587e-05	19.4428	4.37663	34.509	7.88484	2.97908	0.0840663	0.229433
Pbx1	ENSMUSG00000052534	pre B cell leukemia homeobox 1	Mus musculus	V$PBX1_01	0.120438	0.0388889	3.09697	0.00041072	123.98	164.843	83.118	0.504226	-0.987859	0.0682665	0.207143
Pou2f1	ENSMUSG00000026565	POU domain,class 2,transcription factor 1	Mus musculus	V$OCT1_06	0.329556	0.188889	1.74471	0.00044619	503.74	585.717	421.763	0.720081	-0.473768	0.240006	0.414561
Pou5f1	ENSMUSG00000024406	POU domain,class 5,transcription factor 1	Mus musculus	V$OCT4_01	0.786142	0.555556	1.41506	0.000273631	11.706	8.64926	14.7627	1.70681	0.771304	0.602352	0.740091
Prdm1	ENSMUSG00000038151	PR domain containing 1,with ZNF domain	Mus musculus	V$BLIMP1_Q6_01	3.16314	2.46667	1.28236	1.08953e-07	725.12	443.047	1007.19	2.27333	1.18481	0.00426057	0.0379075
Rara	ENSMUSG00000037992	alpha,retinoic acid receptor	Mus musculus	V$RARA_04	0.0934742	0.0222222	4.20634	0.000348474	465.502	514.975	416.03	0.807866	-0.307813	0.506766	0.661147
Rreb1	ENSMUSG00000039087	ras responsive element binding protein 1	Mus musculus	V$RREB1_01	1.29186	0.961111	1.34413	5.74771e-05	4110.95	4699.51	3522.4	0.749525	-0.415951	0.270617	0.445787
Rxra	ENSMUSG00000015846	retinoid X receptor alpha	Mus musculus	V$PXR_Q2	0.118041	0.0333333	3.54123	0.000180278	568.238	850.276	286.201	0.336598	-1.5709	0.0244743	0.119596
Sox30	ENSMUSG00000040489	SRY (sex determining region Y)-box 30	Mus musculus	V$SOX40_04	0.719631	0.516667	1.39283	0.000777556	7.25788	2.81917	11.6966	4.14895	2.05275	0.287608	0.462388
Srebf1	ENSMUSG00000020538	sterol regulatory element binding transcription factor 1	Mus musculus	V$SREBP1_Q6	0.318771	0.211111	1.50997	0.00608277	789.574	935.96	643.188	0.687196	-0.541207	0.154772	0.320096
Stat5a	ENSMUSG00000004043	signal transducer and activator of transcription 5A	Mus musculus	V$STAT5A_Q4	0.666303	0.472222	1.41099	0.00082202	669.355	549.439	789.271	1.4365	0.522562	0.183948	0.35261
Stat5b	ENSMUSG00000020919	signal transducer and activator of transcription 5B	Mus musculus	V$STAT5B_01	0.40865	0.266667	1.53244	0.00156297	737.416	942.774	532.058	0.564353	-0.825329	0.0357469	0.147932
Tbx15	ENSMUSG00000027868	T-box 15	Mus musculus	V$TBX15_02	2.3806	1.91667	1.24205	3.95275e-05	11.2582	3.34916	19.1672	5.723	2.51677	0.0904025	0.238145
Tbx5	ENSMUSG00000018263	T-box 5	Mus musculus	V$TBX5_05	1.25651	0.961111	1.30735	0.000258664	25.3026	10.3987	40.2065	3.86651	1.95103	0.0531168	0.181981
Trp53	ENSMUSG00000059552	transformation related protein 53	Mus musculus	V$TRP53_01	2.80542	2.28889	1.22567	2.63895e-05	428.702	565.157	292.248	0.517109	-0.951459	0.0285814	0.131388
Zbtb3	ENSMUSG00000071661	zinc finger and BTB domain containing 3	Mus musculus	V$ZBTB4_04	1.01144	0.761111	1.3289	0.000519752	44.5174	52.9383	36.0964	0.681858	-0.552456	0.421366	0.587365
Zbtb41	ENSMUSG00000033964	zinc finger and BTB domain containing 41 homolog	Mus musculus	V$ZBTB41_05	0.236681	0.122222	1.93648	0.000653882	614.952	496.747	733.157	1.47592	0.561611	0.164917	0.331229
Zeb1	ENSMUSG00000024238	zinc finger E-box binding homeobox 1	Mus musculus	V$DELTAEF1_01	1.35597	1.01667	1.33375	5.71359e-05	381.184	68.4117	693.957	10.1438	3.34253	4.91168e-05	0.00122249
Zfp39	ENSMUSG00000037001	zinc finger protein 39	Mus musculus	V$ZFP39_01	0.639939	0.444444	1.43986	0.000584354	127.882	148.384	107.379	0.723654	-0.466629	0.41081	0.578756
Zfp90	ENSMUSG00000031907	zinc finger protein 90	Mus musculus	V$ZFP90_05	0.15579	0.0611111	2.5493	0.000379943	582.962	708.51	457.413	0.645598	-0.631292	0.121016	0.277737
Zic1	ENSMUSG00000032368	zinc finger protein of the cerebellum 1	Mus musculus	V$ZIC1_04	0.218106	0.1	2.18106	0.000220311	34.8645	15.9657	53.7632	3.36742	1.75164	0.13523	0.296558

## Sheet: MyD88 Independent TF
ID	Ensembl ID	Gene description	Species	Site model ID	Yes density per 1000bp	No density per 1000bp	Yes-No ratio	P-value	baseMean	KO_UN	KO_100	foldChange	log2FoldChange	pval	padj	baseMean_1	WT_UN	WT_10	foldChange_1	log2FoldChange_1	pval_1	padj_1
Alx4	ENSMUSG00000040310	aristaless-like homeobox 4	Mus musculus	V$ALX4_06	9.83607	7.01667	1.40181	2.12314e-11	143.302	133.481	153.123	1.14715	0.198059	1	1	100.621	63.338	137.904	2.17727	1.12252	0.165862	0.332647
Arid5a	ENSMUSG00000037447	AT rich interactive domain 5A (MRF1-like)	Mus musculus	V$ARID5A_03	0.92004	0.527778	1.74323	0.000937057	38.6204	37.2749	39.966	1.0722	0.10057	0.962312	1	152.79	84.0453	221.534	2.63589	1.39829	0.00315931	0.0306603
Arx	ENSMUSG00000035277	aristaless related homeobox	Mus musculus	V$ARX_04	10.6557	7.73333	1.3779	3.10273e-11	10.8882	12.1459	9.63042	0.792894	-0.334799	0.772229	1	5.71958	1.9478	9.49136	4.87287	2.28477	0.248779	0.423507
Atf4	ENSMUSG00000042406	activating transcription factor 4	Mus musculus	V$ATF4_03	2.35865	1.52778	1.54384	2.68417e-05	1189.43	1242.02	1136.83	0.915304	-0.127677	0.909825	1	3440.15	2756.14	4124.16	1.49635	0.581451	0.243453	0.418428
Bbx	ENSMUSG00000022641	bobby sox homolog (Drosophila)	Mus musculus	V$BBX_03	4.11509	2.36667	1.73877	1.27951e-11	2899.6	2031.91	3767.28	1.85406	0.890691	0.0571937	1	3676.74	3258.82	4094.66	1.25649	0.329396	0.489221	0.647077
Bcl6	ENSMUSG00000022508	B cell leukemia/lymphoma 6	Mus musculus	V$BCL6_02	0.518568	0.194444	2.66692	8.6203e-05	1970.85	2197.2	1744.5	0.793961	-0.332859	0.618927	1	3315.81	4210.6	2421.01	0.57498	-0.798415	0.0216996	0.112287
Cdx2	ENSMUSG00000029646	caudal type homeobox 2	Mus musculus	V$CDX2_Q5_01	1.62262	0.994444	1.63168	9.93054e-05	8.48959	8.79332	8.18587	0.930919	-0.103273	0.927295	1	5.85448	1.09582	10.6131	9.68511	3.27577	0.136603	0.298033
Cebpa	ENSMUSG00000034957	CCAAT/enhancer binding protein (C/EBP),alpha	Mus musculus	V$CEBP_01	0.485112	0.233333	2.07905	0.00232816	138.634	188.191	89.0768	0.473331	-1.07908	0.405964	1	469.057	899.136	38.9791	0.0433517	-4.52777	0.000296026	0.00521144
Cebpb	ENSMUSG00000056501	CCAAT/enhancer binding protein (C/EBP),beta	Mus musculus	V$CEBPB_01	0.368016	0.116667	3.15442	0.000193029	475.071	163.848	786.294	4.79893	2.26271	1.99122e-05		2047.89	464.639	3631.15	7.81499	2.96624	1.53814e-13	3.46042e-11
Cebpg	ENSMUSG00000056216	CCAAT/enhancer binding protein (C/EBP),gamma	Mus musculus	V$CEBPG_Q6_01	0.234192	0.0444444	5.26932	0.00013942	554.519	599.119	509.919	0.851114	-0.232576	0.599782	1	702.74	783.923	621.557	0.79288	-0.334825	0.369405	0.541342
Ctnnb1	ENSMUSG00000006932	beta 1,catenin (cadherin associated protein)	Mus musculus	V$BETACATENIN_Q3	1.38842	0.894444	1.55228	0.000933828	8631.07	6867.52	10394.6	1.51359	0.597974	0.179488	1	10506.2	13061.4	7951.08	0.608748	-0.716084	0.0470069	0.170784
Dbp	ENSMUSG00000059824	D site albumin promoter binding protein	Mus musculus	V$DBP_Q6_01	2.52593	1.77222	1.42529	0.000266713	63.026	81.2724	44.7796	0.550981	-0.859925	0.356955	1	87.7058	143.541	31.8707	0.222032	-2.17116	0.0116467	0.07759
Dlx1	ENSMUSG00000041911	distal-less homeobox 1	Mus musculus	V$DLX1_01	3.16159	2.12222	1.48976	7.33936e-06	7.90277	6.65685	9.14869	1.37433	0.458725	0.819497	1	6.31924	0.487685	12.1508	24.9152	4.63896	0.0799142	0.223855
Dlx2	ENSMUSG00000023391	distal-less homeobox 2	Mus musculus	V$DLX2_01	1.63934	1.1	1.49031	0.000975809	13.2508	9.64791	16.8537	1.74688	0.80478	0.893458	1	6.37189	1.46306	11.2807	7.71038	2.9468	0.22203	0.396511
E2f6	ENSMUSG00000057469	E2F transcription factor 6	Mus musculus	V$E2F6_01	2.89394	1.83333	1.57852	1.34947e-06	296.753	251.635	341.871	1.3586	0.442117	0.45999	1	427.499	461.631	393.367	0.852123	-0.230866	0.538113	0.687088
E4f1	ENSMUSG00000024137	E4F transcription factor 1	Mus musculus	V$PHIAP3_03	0.301104	0.1	3.01104	0.00103162	127.79	159.76	95.8197	0.599772	-0.737515	0.272961	1	218.394	263.771	173.017	0.655936	-0.608373	0.187656	0.356874
Egr2	ENSMUSG00000037868	early growth response 2	Mus musculus	V$EGR2_05	3.61325	1.78333	2.02612	5.25764e-15	171.287	179.825	162.748	0.905035	-0.143954	0.914432	1	239.887	218.448	261.327	1.19629	0.258563	0.675456	0.795472
Elf1	ENSMUSG00000036461	E74-like factor 1	Mus musculus	V$ELF1_Q6	1.30478	0.788889	1.65395	0.000326698	1241.22	1572.41	910.035	0.578753	-0.78898	0.257578	1	2311.11	2971.93	1650.3	0.555295	-0.848673	0.0241655	0.118946
Fos	ENSMUSG00000021250	FBJ osteosarcoma oncogene	Mus musculus	V$CFOS_Q4	0.802944	0.405556	1.97986	0.000251598	758.404	446.418	1070.39	2.39773	1.26167	0.0170857		1083.45	1238.55	928.359	0.749554	-0.415895	0.238008	0.412508
Fosb	ENSMUSG00000003545	FBJ osteosarcoma oncogene B	Mus musculus	V$AP1_Q4_01	0.819672	0.394444	2.07804	9.47518e-05	21.0481	25.7245	16.3717	0.636426	-0.651935	0.463513	1	24.1511	22.4721	25.8302	1.14943	0.200921	0.859325	0.920998
Fosl2	ENSMUSG00000029135	fos-like antigen 2	Mus musculus	V$AP1_Q4_01	0.819672	0.394444	2.07804	9.47518e-05	417.471	245.103	589.84	2.4065	1.26694	0.0112274		2077.57	685.397	3469.74	5.06238	2.33982	0.000333317	0.00569995
Foxa2	ENSMUSG00000037025	forkhead box A2	Mus musculus	V$FOXA2_05	0.535296	0.261111	2.05007	0.0016783	8.40845	8.63091	8.186	0.948452	-0.0763536	0.856897	1	7.94407	0.487685	15.4004	31.5787	4.98088	0.0319114	0.13928
Foxa3	ENSMUSG00000040891	forkhead box A3	Mus musculus	V$HNF3_Q6	0.468384	0.172222	2.71965	0.000149248	8.32696	10.3942	6.2597	0.602229	-0.731616	0.757053	1	7.92161	2.21769	13.6255	6.14402	2.61918	0.143126	0.306087
Foxc1	ENSMUSG00000050295	forkhead box C1	Mus musculus	V$FREAC3_01	0.602208	0.3	2.00736	0.00117321	10.8281	13.9517	7.70439	0.552218	-0.856691	0.497726	1	8.65662	1.67125	15.642	9.35944	3.22642	0.092099	0.24042
Foxd1	ENSMUSG00000078302	forkhead box D1	Mus musculus	V$FREAC4_01	1.50552	0.977778	1.53974	0.000715276	9.51288	4.58033	14.4454	3.1538	1.65709	0.347368	1	7.45286	1.759	13.1467	7.47398	2.90188	0.22969	0.403583
Foxg1	ENSMUSG00000020950	forkhead box G1	Mus musculus	V$FOXG1_05	0.66912	0.311111	2.15074	0.000239967	17.9512	12.7898	23.1126	1.80712	0.853694	0.497278	1	9.9442	2.19164	17.6968	8.07467	3.0134	0.10844	0.26163
Foxi1	ENSMUSG00000047861	forkhead box I1	Mus musculus	V$HFH3_01	0.284376	0.0833333	3.41251	0.000580012	11.1106	9.22062	13.0005	1.40994	0.49563	0.632022	1	4.70629	1.52181	7.89077	5.18513	2.37438	0.320913	0.49428
Foxj1	ENSMUSG00000034227	forkhead box J1	Mus musculus	V$HFH4_01	0.401472	0.161111	2.4919	0.00100644	8.91682	8.20361	9.63003	1.17388	0.231281	0.830884	1	7.71387	2.48758	12.9401	5.2019	2.37904	0.183024	0.351514
Foxj2	ENSMUSG00000003154	forkhead box J2	Mus musculus	V$FOXJ2_01	0.234192	0.0666667	3.51288	0.00148611	361.862	467.568	256.156	0.547847	-0.868156	0.378028	1	877.018	1171.52	582.512	0.497226	-1.00803	0.00992806	0.0690975
Foxj3	ENSMUSG00000032998	forkhead box J3	Mus musculus	V$FOXJ3_14	0.886584	0.472222	1.87747	0.000322635	496.263	616.476	376.05	0.609999	-0.71312	0.33899	1	1010.65	1122.3	898.996	0.80103	-0.320072	0.379665	0.550279
Foxk1	ENSMUSG00000056493	forkhead box K1	Mus musculus	V$FOXK1_07	0.451656	0.188889	2.39112	0.000775656	173.018	208.81	137.225	0.657179	-0.605642	0.593113	1	480.286	693.751	266.821	0.384606	-1.37855	0.000930487	0.0124669
Foxo1	ENSMUSG00000044167	forkhead box O1	Mus musculus	V$FOXO1_01	0.535296	0.238889	2.24077	0.000587307	218.796	226.209	211.383	0.934459	-0.097796	0.816383	1	278.313	365.689	190.937	0.52213	-0.93752	0.0326442	0.141092
Foxo3	ENSMUSG00000048756	forkhead box O3	Mus musculus	V$FOXO3_01	0.184008	0.0277778	6.62429	0.000277842	267.48	383.771	151.19	0.393959	-1.34388	0.0847668	1	757.594	1088.84	426.348	0.391562	-1.35269	0.000720813	0.0102633
Foxo4	ENSMUSG00000042903	forkhead box O4	Mus musculus	V$FOXO4_01	0.200736	0.0444444	4.51656	0.000910846	150.898	169.862	131.933	0.776704	-0.364563	0.558326	1	271.749	430.663	112.835	0.262002	-1.93235	2.37004e-05	0.000662653
Foxp1	ENSMUSG00000030067	forkhead box P1	Mus musculus	V$FOXP1_01	0.869856	0.433333	2.00736	0.000111465	1287.16	1641.18	933.15	0.568586	-0.814549	0.169244	1	4459.44	3428.2	5490.69	1.60163	0.679537	0.0601598	0.193592
Foxp3	ENSMUSG00000039521	forkhead box P3	Mus musculus	V$FOXP3_01	0.685848	0.277778	2.46905	2.36769e-05	29.5258	34.0131	25.0384	0.73614	-0.441948	0.668105	1	40.3694	44.4532	36.2856	0.816266	-0.292889	0.716018	0.824926
Gata6	ENSMUSG00000005836	GATA binding protein 6	Mus musculus	V$GATA6_06	2.35865	1.38889	1.69823	6.57666e-07	8.97127	8.79332	9.14921	1.04047	0.0572392	0.870147	1	7.32613	0.731528	13.9207	19.0297	4.25018	0.0644452	0.200248
Gfi1b	ENSMUSG00000026815	growth factor independent 1B	Mus musculus	V$GFI1B_01	0.284376	0.0722222	3.93751	0.000208068	15.306	10.8698	19.7421	1.81622	0.860942	0.53224	1	9.06281	2.70537	15.4202	5.69986	2.51093	0.126386	0.284417
Gtf2b	ENSMUSG00000028271	general transcription factor IIB	Mus musculus	V$TFIIB_Q6	1.5557	1.06667	1.45847	0.00210651	659.03	557.758	760.302	1.36314	0.446934	0.409704	1	1056.82	899.452	1214.19	1.34992	0.432875	0.251954	0.426392
Hdx	ENSMUSG00000034551	highly divergent homeobox	Mus musculus	V$HDX_01	0.853128	0.472222	1.80662	0.000785669	17.6385	8.79332	26.4836	3.01179	1.59062	0.248602	1	9.12509	0.851977	17.3982	20.421	4.35198	0.0191198	0.104847
Hlf	ENSMUSG00000003949	hepatic leukemia factor	Mus musculus	V$HLF_01	1.35497	0.816667	1.65914	0.000236721	21.0691	18.0623	24.0759	1.33294	0.414609	0.802671	1	9.77979	0.783628	18.776	23.9603	4.58257	0.0215219	0.111959
Hlx	ENSMUSG00000039377	H2.0-like homeobox	Mus musculus	V$HB24_01	3.93108	2.58333	1.52171	1.91279e-07	111.924	116.473	107.376	0.921897	-0.117322	0.925087	1	481.957	376.233	587.68	1.56201	0.643403	0.110889	0.264811
Hmga1	ENSMUSG00000046711	high mobility group AT-hook 1	Mus musculus	V$HMGIY_Q3	2.00736	1.25556	1.59878	3.26788e-05	84.5077	107.867	61.1488	0.566892	-0.818853	0.644249	1	508.085	828.025	188.146	0.227222	-2.13782	0.000889257	0.0120161
Hmga2	ENSMUSG00000056758	high mobility group AT-hook 2	Mus musculus	V$HMGIY_Q3	2.00736	1.25556	1.59878	3.26788e-05	1433.02	1822.14	1043.91	0.572902	-0.803639	0.129074	1	2432.59	4250.76	614.431	0.144546	-2.7904	1.95018e-12	3.3783e-10
Hnf1a	ENSMUSG00000029556	HNF1 homeobox A	Mus musculus	V$HNF1_Q6_01	22.9174	16.1722	1.41708	1.43139e-25	26.9402	23.0641	30.8164	1.33612	0.41805	0.627732	1	25.3688	21.1973	29.5403	1.39359	0.478807	0.591126	0.731016
Hnf1b	ENSMUSG00000020679	HNF1 homeobox B	Mus musculus	V$HNF1B_Q6_01	1.10405	0.638889	1.72808	0.000374118	11.3847	5.43492	17.3344	3.18945	1.67331	0.268293	1	9.774	2.30544	17.2426	7.47909	2.90286	0.0798276	0.22369
Hoxa10	ENSMUSG00000000938	homeobox A10	Mus musculus	V$HOXA10_01	2.34192	1.56111	1.50016	7.89723e-05	14.7795	7.40898	22.1501	2.98963	1.57997	0.348061	1	5.20316	0.425989	9.98033	23.4286	4.5502	0.0881677	0.234757
Hoxa9	ENSMUSG00000038227	homeobox A9	Mus musculus	V$HOXA9_Q5_01	1.52225	0.894444	1.70189	5.21925e-05	14.8848	8.10115	21.6684	2.67473	1.41939	0.332254	1	6.54526	0.939724	12.1508	12.9302	3.69267	0.0986522	0.249792
Hoxb3	ENSMUSG00000048763	homeobox B3	Mus musculus	V$HOXB3_01	5.65406	3.98889	1.41745	1.36522e-07	24.3107	24.0636	24.5577	1.02053	0.029323	0.821118	1	15.7322	7.99882	23.4656	2.93363	1.55269	0.238676	0.413203
Hoxd13	ENSMUSG00000001819	homeobox D13	Mus musculus	V$HOXD13_06	1.23787	0.694444	1.78254	8.52923e-05	7.78842	10.7616	4.81528	0.447452	-1.1602	0.470388	1	5.50007	0	11.0001	NaN	NaN	0.0304371	0.135508
Hoxd3	ENSMUSG00000079277	homeobox D3	Mus musculus	V$HOXD3_01	2.14118	1.33333	1.60589	1.57576e-05	14.4577	8.20943	20.7061	2.52223	1.3347	0.737098	1	6.41205	1.27797	11.5461	9.03478	3.17549	0.196589	0.367242
Irf1	ENSMUSG00000018899	interferon regulatory factor 1	Mus musculus	V$IRF_Q6	0.267648	0.0611111	4.3797	0.000156354	772.004	480.37	1063.64	2.21421	1.14679	0.0160859		2106.49	1082.7	3130.28	2.89118	1.53166	0.0628344	0.197912
Irf2	ENSMUSG00000031627	interferon regulatory factor 2	Mus musculus	V$IRF_Q6	0.267648	0.0611111	4.3797	0.000156354	1281.58	1312.68	1250.47	0.952609	-0.0700445	0.899399	1	2310.19	2113.87	2506.5	1.18574	0.245788	0.48097	0.640124
Irf3	ENSMUSG00000003184	interferon regulatory factor 3	Mus musculus	V$IRF_Q6	0.267648	0.0611111	4.3797	0.000156354	115.157	160.015	70.2983	0.439322	-1.18665	0.259899	1	361.895	486.971	236.818	0.486308	-1.04006	0.0141092	0.0870111
Irf4	ENSMUSG00000021356	interferon regulatory factor 4	Mus musculus	V$IRF_Q6	0.267648	0.0611111	4.3797	0.000156354	55.4758	64.726	46.2256	0.714173	-0.485654	0.558577	1	80.0546	81.4357	78.6734	0.966081	-0.0497844	0.88132	0.935255
Irf5	ENSMUSG00000029771	interferon regulatory factor 5	Mus musculus	V$IRF_Q6	0.267648	0.0611111	4.3797	0.000156354	899.953	1141.22	658.688	0.57718	-0.792906	0.450438	1	2527.28	3844	1210.57	0.314925	-1.66692	1.20321e-05	0.000374879
Irf6	ENSMUSG00000026638	interferon regulatory factor 6	Mus musculus	V$IRF_Q6	0.267648	0.0611111	4.3797	0.000156354	41.3229	45.0879	37.558	0.832995	-0.263621	0.710067	1	21.9272	20.8428	23.0116	1.10406	0.142812	0.917963	0.95724
Irf7	ENSMUSG00000025498	interferon regulatory factor 7	Mus musculus	V$IRF_Q6	0.267648	0.0611111	4.3797	0.000156354	229.885	173.275	286.494	1.6534	0.72544	0.137248	1	975.827	713.688	1237.97	1.7346	0.794605	0.251427	0.42594
Irf8	ENSMUSG00000041515	interferon regulatory factor 8	Mus musculus	V$IRF_Q6	0.267648	0.0611111	4.3797	0.000156354	513.42	731.202	295.639	0.404319	-1.30643	0.211609	1	1355.81	1957.14	754.473	0.385497	-1.37521	0.000269025	0.0048545
Irf9	ENSMUSG00000002325	interferon regulatory factor 9	Mus musculus	V$IRF_Q6_01	0.301104	0.0666667	4.51656	4.8143e-05	150.1	150.455	149.746	0.995289	-0.00681214	0.787334	1	506.736	539.396	474.076	0.878902	-0.186225	0.699668	0.811593
Irx2	ENSMUSG00000001504	Iroquois related homeobox 2 (Drosophila)	Mus musculus	V$IRX2_01	1.38842	0.722222	1.92243	4.37583e-06	10.4187	7.35484	13.4825	1.83315	0.874321	0.631623	1	7.50178	0.913674	14.0899	15.4211	3.94684	0.0619446	0.196821
Irx3	ENSMUSG00000031734	Iroquois related homeobox 3	Mus musculus	V$IRX3_01	0.719304	0.4	1.79826	0.00205857	8.06544	5.53738	10.5935	1.91309	0.935904	0.736608	1	6.31985	0.425989	12.2137	28.6715	4.84154	0.0439501	0.16468
Irx5	ENSMUSG00000031737	Iroquois related homeobox 5 (Drosophila)	Mus musculus	V$IRX5_01	1.2546	0.616667	2.03449	2.85867e-06	12.2032	11.4054	13.001	1.1399	0.188905	0.99124	1	7.63433	3.21911	12.0495	3.74313	1.90425	0.297418	0.471854
Irx6	ENSMUSG00000031738	Iroquois related homeobox 6 (Drosophila)	Mus musculus	V$IRXB3_01	1.6728	0.827778	2.02083	9.22366e-08	14.9869	10.2318	19.7421	1.92948	0.948212	0.487786	1	6.17017	2.79977	9.54058	3.40762	1.76877	0.348509	0.522116
Jdp2	ENSMUSG00000034271	Jun dimerization protein 2	Mus musculus	V$JUNDM2_04	0.736032	0.311111	2.36582	2.51192e-05	155.253	59.641	250.864	4.20624	2.07253	0.000591826		1187.61	116.266	2258.96	19.4292	4.28016	0.00043524	0.00697998
Jun	ENSMUSG00000052684	jun proto-oncogene	Mus musculus	V$CFOSCJUN_Q5	1.84008	1.18333	1.555	0.000152756	1524.61	1558.01	1491.2	0.957122	-0.0632258	0.908555	1	3516.16	3986.63	3045.69	0.763975	-0.388402	0.30065	0.47511
Junb	ENSMUSG00000052837	jun B proto-oncogene	Mus musculus	V$AP1_Q4_01	0.819672	0.394444	2.07804	9.47518e-05	277.741	272.847	282.635	1.03587	0.0508494	0.729434	1	1902.76	1760.74	2044.77	1.16131	0.215756	0.586415	0.728176
Jund	ENSMUSG00000071076	jun D proto-oncogene	Mus musculus	V$AP1_Q4_01	0.819672	0.394444	2.07804	9.47518e-05	230.571	282.988	178.154	0.629547	-0.667614	0.374908	1	962.505	1067.91	857.097	0.802591	-0.317264	0.484433	0.642805
Klf2	ENSMUSG00000055148	Kruppel-like factor 2 (lung)	Mus musculus	V$LKLF_Q6	0.535296	0.266667	2.00736	0.00213596	126.997	126.877	127.118	1.0019	0.00274558	0.965997	1	164.428	209.154	119.703	0.572321	-0.805103	0.296074	0.470359
Lef1	ENSMUSG00000027985	lymphoid enhancer binding factor 1	Mus musculus	V$LEF1_Q3	1.18769	0.716667	1.65724	0.000561393	13.2654	13.5303	13.0005	0.960846	-0.0576234	0.940214	1	11.8675	3.00132	20.7338	6.90822	2.78831	0.0661209	0.203484
Lhx3	ENSMUSG00000026934	LIM homeobox protein 3	Mus musculus	V$LHX3_01	0.66912	0.266667	2.5092	2.29834e-05	10.9486	8.41435	13.4829	1.60237	0.680205	0.913247	1	6.3068	2.36713	10.2465	4.32865	2.11392	0.35073	0.524174
Lhx5	ENSMUSG00000029595	LIM homeobox protein 5	Mus musculus	V$LHX5_01	0.50184	0.222222	2.25828	0.000785784	19.2306	14.3848	24.0764	1.67373	0.74307	0.791911	1	9.79172	2.25334	17.3301	7.69087	2.94315	0.083426	0.228705
Lhx9	ENSMUSG00000019230	LIM homeobox protein 9	Mus musculus	V$LHX9_01	3.32887	2.28333	1.4579	1.19742e-05	27.2478	19.3441	35.1514	1.81716	0.861684	0.689118	1	13.1786	3.51505	22.8422	6.4984	2.70008	0.0552152	0.185475
Mafb	ENSMUSG00000074622	protein B (avian),v-maf musculoaponeurotic fibrosarcoma oncogene family	Mus musculus	V$MAFB_08	0.58548	0.288889	2.02666	0.00120925	1103.64	1260.64	946.635	0.750913	-0.413282	0.520727	1	1898.34	2562.22	1234.46	0.481792	-1.05352	0.00422867	0.0377792
Mafk	ENSMUSG00000018143	protein K (avian),v-maf musculoaponeurotic fibrosarcoma oncogene family	Mus musculus	V$MAFK_Q3	0.267648	0.0888889	3.01104	0.001942	137.64	156.348	118.931	0.760683	-0.394632	0.632613	1	357.585	425.846	289.325	0.679412	-0.557642	0.233634	0.407784
Mecom	ENSMUSG00000027684	MDS1 and EVI1 complex locus	Mus musculus	V$EVI1_04	6.30646	4.35556	1.44791	4.73395e-09	25.4779	21.1016	29.8542	1.41478	0.500579	0.776379	1	15.8638	1.09582	30.6317	27.9533	4.80494	0.00302792	0.0296846
Meis1	ENSMUSG00000020160	Meis homeobox 1	Mus musculus	V$MEIS1_06	0.200736	0.0388889	5.16178	0.000471294	95.4805	104.771	86.1896	0.822645	-0.281659	0.72999	1	112.336	116.811	107.86	0.92337	-0.115019	0.859759	0.921292
Meox1	ENSMUSG00000001493	mesenchyme homeobox 1	Mus musculus	V$MOX1_01	2.29174	1.48889	1.53923	3.83103e-05	8.23077	4.42373	12.0378	2.72119	1.44424	0.415962	1	5.35554	1.6356	9.07548	5.5487	2.47215	0.274004	0.44873
Mnx1	ENSMUSG00000001566	motor neuron and pancreas homeobox 1	Mus musculus	V$HB9_01	1.70626	1.09444	1.55902	0.000240008	8.84186	5.64566	12.0381	2.13227	1.09239	0.638694	1	5.2751	0	10.5502	NaN	NaN	0.0595627	0.192669
Myb	ENSMUSG00000019982	myeloblastosis oncogene	Mus musculus	V$MYB_07	0.485112	0.211111	2.2979	0.000786625	15.5648	15.7209	15.4087	0.98014	-0.02894	0.933172	1	15.4743	5.4368	25.5118	4.69243	2.23034	0.0712517	0.211642
Nfatc2	ENSMUSG00000027544	calcineurin dependent 2,cytoplasmic,nuclear factor of activated T cells	Mus musculus	V$NFAT_Q6	1.35497	0.827778	1.63687	0.000324474	341.19	463.297	219.083	0.472877	-1.08046	0.085542	1	634.728	1040.92	228.538	0.219555	-2.18735	1.52344e-07	8.65265e-06
Nfatc4	ENSMUSG00000023411	calcineurin dependent 4,cytoplasmic,nuclear factor of activated T cells	Mus musculus	V$NFAT3_Q3	1.72298	1.14444	1.50552	0.000570313	28.9722	24.7191	33.2253	1.34412	0.426657	0.943962	1	21.7914	5.61229	37.9706	6.76561	2.75822	0.133394	0.294339
Nfe2l1	ENSMUSG00000038615	-like 1,erythroid derived 2,nuclear factor	Mus musculus	V$TCF11_01	0.786216	0.427778	1.83791	0.000945015	1070.37	1241.3	899.436	0.724592	-0.46476	0.710863	1	3845.53	3513.73	4177.34	1.18886	0.249581	0.528277	0.679385
Nfil3	ENSMUSG00000056749	interleukin 3,nuclear factor,regulated	Mus musculus	V$E4BP4_01	3.42924	2.18333	1.57064	2.05422e-07	108.092	56.8065	159.378	2.80562	1.48832	0.0166539		529.176	99.2811	959.071	9.66015	3.27205	2.67392e-13	5.40341e-11
Nfkb1	ENSMUSG00000028163	nuclear factor of kappa light polypeptide gene enhancer in B cells 1,p105	Mus musculus	V$P50_Q6	0.552024	0.261111	2.11413	0.00099182	919.462	676.573	1162.35	1.718	0.780729	0.10581	1	4652.32	1813.71	7490.93	4.13018	2.0462	3.9288e-08	2.62775e-06
Nfkb2	ENSMUSG00000025225	nuclear factor of kappa light polypeptide gene enhancer in B cells 2,p49/p100	Mus musculus	V$NFKB_Q6_01	0.301104	0.0833333	3.61325	0.000260427	301.801	196.26	407.343	2.07553	1.05348	0.184474	1	2027.92	879.604	3176.25	3.611	1.8524	1.41775e-06	5.97594e-05
Nr1h2	ENSMUSG00000060601	group H,member 2,nuclear receptor subfamily 1	Mus musculus	V$DR4_Q2	0.535296	0.272222	1.96639	0.00269687	117.277	151.738	82.8161	0.545782	-0.873604	0.477426	1	439.18	599.557	278.802	0.465014	-1.10465	0.00756078	0.0573445
Nr1h3	ENSMUSG00000002108	group H,member 3,nuclear receptor subfamily 1	Mus musculus	V$DR4_Q2	0.535296	0.272222	1.96639	0.00269687	131.503	131.557	131.448	0.999174	-0.00119189	0.798166	1	367.972	347.692	388.251	1.11665	0.159182	0.617427	0.75184
Nr1i2	ENSMUSG00000022809	group I,member 2,nuclear receptor subfamily 1	Mus musculus	V$DR4_Q2	0.535296	0.272222	1.96639	0.00269687	11.5654	9.16648	13.9642	1.5234	0.607296	0.837701	1	7.80722	1.91509	13.6994	7.15336	2.83862	0.286673	0.461271
Nr1i3	ENSMUSG00000005677	group I,member 3,nuclear receptor subfamily 1	Mus musculus	V$DR4_Q2	0.535296	0.272222	1.96639	0.00269687	9.31447	8.99825	9.63069	1.07028	0.0979949	0.849531	1	6.56586	6.82191	6.3098	0.924932	-0.11258	1	1
Nr2e1	ENSMUSG00000019803	group E,member 1,nuclear receptor subfamily 2	Mus musculus	V$TLX_01	0.351288	0.111111	3.16159	0.000263235	44.1847	41.6619	46.7074	1.12111	0.164923	1	1	24.9284	9.53393	40.3228	4.22939	2.08045	0.0729543	0.213776
Nr2f2	ENSMUSG00000030551	group F,member 2,nuclear receptor subfamily 2	Mus musculus	V$DR4_Q2	0.535296	0.272222	1.96639	0.00269687	34.7826	35.8596	33.7055	0.939928	-0.0893774	1	1	19.4428	4.37663	34.509	7.88484	2.97908	0.0840663	0.229433
Nr4a1	ENSMUSG00000023034	group A,member 1,nuclear receptor subfamily 4	Mus musculus	V$NUR77_Q5_01	0.16728	0.0166667	10.0368	0.000122991	94.1912	64.6369	123.745	1.91447	0.936944	0.103364	1	209.133	125.353	292.914	2.33671	1.22448	0.030395	0.13539
Pax6	ENSMUSG00000027168	paired box 6	Mus musculus	V$PAX6_02	4.04818	2.82778	1.43158	4.18052e-06	14.906	9.58796	20.2241	2.10932	1.07678	0.57047	1	16.5235	4.62047	28.4265	6.1523	2.62113	0.0673194	0.205531
Pax7	ENSMUSG00000028736	paired box 7	Mus musculus	V$PAX7_01	1.33824	0.8	1.6728	0.000212549	17.4218	9.80451	25.0391	2.55383	1.35266	0.344311	1	6.88333	0.425989	13.3407	31.317	4.96887	0.031723	0.138772
Pbx1	ENSMUSG00000052534	pre B cell leukemia homeobox 1	Mus musculus	V$PBX1_10	0.50184	0.188889	2.6568	0.000116607	99.8678	94.2863	105.449	1.11839	0.161429	0.710093	1	123.98	164.843	83.118	0.504226	-0.987859	0.0682665	0.207143
Pou2f1	ENSMUSG00000026565	POU domain,class 2,transcription factor 1	Mus musculus	V$POU2F1_Q4_01	5.00167	3.81111	1.31239	6.6735e-05	323.704	362.837	284.57	0.784292	-0.350538	0.543907	1	503.74	585.717	421.763	0.720081	-0.473768	0.240006	0.414561
Pou2f2	ENSMUSG00000008496	POU domain,class 2,transcription factor 2	Mus musculus	V$POU2F2_04	1.12078	0.683333	1.64016	0.000962016	220.306	334.199	106.413	0.318411	-1.65104	0.0407762	1	1501.46	913.369	2089.55	2.28774	1.19392	0.00349752	0.0331442
Pou3f3	ENSMUSG00000045515	POU domain,class 3,transcription factor 3	Mus musculus	V$BRN1_Q6	1.68953	1.23333	1.36989	0.00593547	8.75144	10.7616	6.74131	0.626425	-0.674787	0.653867	1	6.33261	2.19164	10.4736	4.77888	2.25667	0.257664	0.431967
Pou5f1	ENSMUSG00000024406	POU domain,class 5,transcription factor 1	Mus musculus	V$OCT4_01	0.4182	0.122222	3.42164	3.07889e-05	13.392	16.1907	10.5934	0.654289	-0.612	0.626216	1	11.706	8.64926	14.7627	1.70681	0.771304	0.602352	0.740091
Pou6f1	ENSMUSG00000009739	POU domain,class 6,transcription factor 1	Mus musculus	V$POU6F1_01	1.07059	0.561111	1.90799	5.94219e-05	136.262	164.667	107.856	0.654995	-0.610443	0.417225	1	193.244	257.939	128.548	0.498366	-1.00472	0.0407224	0.158451
Prdm1	ENSMUSG00000038151	PR domain containing 1,with ZNF domain	Mus musculus	V$BLIMP1_Q4	0.568752	0.205556	2.7669	2.41925e-05	357.15	337.764	376.536	1.11479	0.156771	0.768043	1	725.12	443.047	1007.19	2.27333	1.18481	0.00426057	0.0379075
Rara	ENSMUSG00000037992	alpha,retinoic acid receptor	Mus musculus	V$DR4_Q2	0.535296	0.272222	1.96639	0.00269687	149.581	177.823	121.339	0.682357	-0.551401	0.474868	1	465.502	514.975	416.03	0.807866	-0.307813	0.506766	0.661147
Rarg	ENSMUSG00000001288	gamma,retinoic acid receptor	Mus musculus	V$DR4_Q2	0.535296	0.272222	1.96639	0.00269687	124.991	102.159	147.823	1.44698	0.533047	0.382813	1	282.102	307.81	256.394	0.832962	-0.263677	0.815699	0.892011
Rela	ENSMUSG00000024927	v-rel reticuloendotheliosis viral oncogene homolog A (avian)	Mus musculus	V$NFKAPPAB_01	0.284376	0.0833333	3.41251	0.000580012	329.54	379.33	279.751	0.737488	-0.439309	0.661951	1	1132.94	1166.7	1099.18	0.94213	-0.0860021	0.839762	0.908009
Relb	ENSMUSG00000002983	avian reticuloendotheliosis viral (v-rel) oncogene related B	Mus musculus	V$RELBP50_Q3	0.317832	0.105556	3.01104	0.000753432	135.366	84.3909	186.341	2.20807	1.14279	0.0437244	1	417.074	259.335	574.813	2.21649	1.14827	0.00413219	0.0371414
Rxra	ENSMUSG00000015846	retinoid X receptor alpha	Mus musculus	V$DR4_Q2	0.535296	0.272222	1.96639	0.00269687	295.15	389.033	201.266	0.517348	-0.950792	0.37526	1	568.238	850.276	286.201	0.336598	-1.5709	0.0244743	0.119596
Rxrb	ENSMUSG00000039656	retinoid X receptor beta	Mus musculus	V$DR4_Q2	0.535296	0.272222	1.96639	0.00269687	128.972	164.534	93.4105	0.567728	-0.816729	0.312172	1	333.864	513.899	153.829	0.299338	-1.74015	6.75023e-05	0.00159311
Sall4	ENSMUSG00000027547	sal-like 4 (Drosophila)	Mus musculus	V$DRRS_04	3.89762	2.53889	1.53517	1.28333e-07	21.2467	10.2318	32.2616	3.15307	1.65676	0.164358	1	11.6833	2.63702	20.7295	7.86094	2.9747	0.0632493	0.198426
Shox2	ENSMUSG00000027833	short stature homeobox 2	Mus musculus	V$SHOX2_01	1.38842	0.783333	1.77246	3.85183e-05	11.1439	5.43492	16.8529	3.10086	1.63267	0.291716	1	6.65837	1.48911	11.8276	7.94278	2.98964	0.204278	0.376271
Six1	ENSMUSG00000051367	sine oculis-related homeobox 1	Mus musculus	V$SIX1_Q3	0.936768	0.505556	1.85295	0.000284287	19.6393	11.3513	27.9273	2.46028	1.29882	0.211083	1	25.042	0.243843	49.8402	204.395	7.67522	1.14433e-06	4.93929e-05
Sox10	ENSMUSG00000033006	SRY (sex determining region Y)-box 10	Mus musculus	V$SOX_Q6	3.26196	2.11667	1.54108	1.03515e-06	16.7207	11.7728	21.6686	1.84057	0.880155	0.649619	1	10.3752	1.94114	18.8093	9.68979	3.27647	0.0581485	0.190152
Sox11	ENSMUSG00000063632	SRY (sex determining region Y)-box 11	Mus musculus	V$SOX11_05	2.34192	1.53889	1.52183	4.77911e-05	24.0065	18.6403	29.3727	1.57576	0.65605	0.6869	1	11.2859	1.33966	21.2322	15.8489	3.98631	0.0164304	0.0957215
Sox12	ENSMUSG00000051817	SRY (sex determining region Y)-box 12	Mus musculus	V$SOX_Q6	3.26196	2.11667	1.54108	1.03515e-06	15.2188	14.0658	16.3719	1.16395	0.219024	1	1	12.0391	5.49184	18.5864	3.38437	1.75889	0.2593	0.433638
Sox13	ENSMUSG00000070643	SRY (sex determining region Y)-box 13	Mus musculus	V$SOX_Q6	3.26196	2.11667	1.54108	1.03515e-06	14.8094	16.1365	13.4822	0.83551	-0.259272	0.900051	1	12.8332	2.55888	23.1076	9.03038	3.17479	0.0563965	0.18748
Sox17	ENSMUSG00000025902	SRY (sex determining region Y)-box 17	Mus musculus	V$SOX17_08	0.736032	0.377778	1.94832	0.000566904	12.2906	7.24656	17.3347	2.39213	1.25829	0.449026	1	7.5833	2.09724	13.0694	6.23169	2.63962	0.212258	0.385464
Sox21	ENSMUSG00000061517	SRY (sex determining region Y)-box 21	Mus musculus	V$SOX_Q6	3.26196	2.11667	1.54108	1.03515e-06	13.9128	11.9352	15.8904	1.33139	0.412936	0.969229	1	5.59321	1.02747	10.1589	9.88733	3.30558	0.200585	0.371789
Sox30	ENSMUSG00000040489	SRY (sex determining region Y)-box 30	Mus musculus	V$SOX40_04	1.99063	1.26111	1.57847	5.30213e-05	12.6941	6.60853	18.7798	2.84175	1.50678	0.610763	1	7.25788	2.81917	11.6966	4.14895	2.05275	0.287608	0.462388
Sox5	ENSMUSG00000041540	SRY (sex determining region Y)-box 5	Mus musculus	V$SOX5_Q5	3.83071	2.82778	1.35467	0.000106428	81.4622	64.6951	98.2294	1.51834	0.602498	0.631558	1	52.434	16.7916	88.0764	5.24526	2.39101	0.0335714	0.143276
Sox6	ENSMUSG00000051910	SRY (sex determining region Y)-box 6	Mus musculus	V$SOX_Q6	3.26196	2.11667	1.54108	1.03515e-06	29.3028	23.4547	35.151	1.49868	0.583689	0.766488	1	15.1845	4.34098	26.028	5.99589	2.58397	0.110596	0.26451
Sox8	ENSMUSG00000024176	SRY (sex determining region Y)-box 8	Mus musculus	V$SOX8_04	1.85681	1.08333	1.71398	6.86554e-06	14.3704	11.4054	17.3353	1.51992	0.603998	0.986114	1	8.26867	2.47133	14.066	5.69167	2.50885	0.174127	0.341957
Sox9	ENSMUSG00000000567	SRY (sex determining region Y)-box 9	Mus musculus	V$SOX_Q6	3.26196	2.11667	1.54108	1.03515e-06	14.0447	13.1629	14.9264	1.13397	0.181386	0.741541	1	13.2362	3.87269	22.5998	5.83567	2.5449	0.14704	0.311124
Stat3	ENSMUSG00000004040	signal transducer and activator of transcription 3	Mus musculus	V$STAT_01	3.44597	2.07778	1.65849	9.09426e-09	1009.64	1022.08	997.191	0.975647	-0.0355687	0.895728	1	3522.84	2249.81	4795.87	2.13168	1.09199	0.00302552	0.0296779
Stat5a	ENSMUSG00000004043	signal transducer and activator of transcription 5A	Mus musculus	V$STAT5A_Q6	1.18769	0.688889	1.72406	0.000243207	163.366	191.91	134.822	0.702528	-0.509373	0.421515	1	669.355	549.439	789.271	1.4365	0.522562	0.183948	0.35261
Stat5b	ENSMUSG00000020919	signal transducer and activator of transcription 5B	Mus musculus	V$STAT_01	3.44597	2.07778	1.65849	9.09426e-09	296.096	370.703	221.49	0.597487	-0.74302	0.268037	1	737.416	942.774	532.058	0.564353	-0.825329	0.0357469	0.147932
Stat6	ENSMUSG00000002147	signal transducer and activator of transcription 6	Mus musculus	V$STAT_01	3.44597	2.07778	1.65849	9.09426e-09	1340.88	1756.82	924.954	0.526495	-0.925509	0.347401	1	3558.32	4577.63	2539.01	0.554656	-0.850335	0.0190875	0.104777
Tbp	ENSMUSG00000014767	TATA box binding protein	Mus musculus	V$TBP_Q6	1.12078	0.666667	1.68116	0.000592344	229.245	249.035	209.454	0.841064	-0.249712	0.734824	1	487.673	446.801	528.545	1.18295	0.242392	0.548124	0.696087
Tbx15	ENSMUSG00000027868	T-box 15	Mus musculus	V$TBX15_02	0.618936	0.288889	2.14247	0.00042407	18.06	11.0806	25.0393	2.25975	1.17616	0.523896	1	11.2582	3.34916	19.1672	5.723	2.51677	0.0904025	0.238145
Tbx2	ENSMUSG00000000093	T-box 2	Mus musculus	V$TBX2_04	0.50184	0.216667	2.31618	0.000588181	17.4696	12.3083	22.6308	1.83866	0.878652	0.419486	1	8.03868	1.91509	14.1623	7.39507	2.88656	0.139441	0.301499
Tbx22	ENSMUSG00000031241	T-box 22	Mus musculus	V$TBX22_01	2.32519	1.56111	1.48945	0.000106667	21.5804	16.6779	26.483	1.58791	0.667126	0.517529	1	13.5979	1.8534	25.3425	13.6735	3.77331	0.0183872	0.102387
Tbx3	ENSMUSG00000018604	T-box 3	Mus musculus	V$TBX3_02	0.50184	0.216667	2.31618	0.000588181	17.2385	8.47431	26.0027	3.06841	1.61749	0.541815	1	10.5414	1.21921	19.8637	16.2922	4.02611	0.0346862	0.145794
Tbx5	ENSMUSG00000018263	T-box 5	Mus musculus	V$TBX5_05	0.736032	0.405556	1.81487	0.00161455	35.5593	33.0793	38.0393	1.14994	0.201561	0.829877	1	25.3026	10.3987	40.2065	3.86651	1.95103	0.0531168	0.181981
Tcf7	ENSMUSG00000000782	T cell specific,transcription factor 7	Mus musculus	V$TCF7_05	1.48879	0.916667	1.62414	0.000208896	13.4251	15.775	11.0751	0.702067	-0.510319	0.696103	1	8.06189	3.489	12.6348	3.62132	1.85651	0.292032	0.466556
Tcf7l2	ENSMUSG00000024985	HMG box,T cell specific,transcription factor 7 like 2	Mus musculus	V$TCF4_Q5_01	2.32519	1.58333	1.46854	0.000171515	313.101	457.195	169.007	0.369661	-1.43573	0.248987	1	513.258	774.609	251.907	0.325205	-1.62058	9.6608e-05	0.00211841
Tef	ENSMUSG00000022389	thyrotroph embryonic factor	Mus musculus	V$VBP_01	3.49615	2.37222	1.47379	4.36214e-06	292.139	319.453	264.824	0.828992	-0.27057	0.865232	1	412.708	649.797	175.618	0.270266	-1.88755	1.9102e-05	0.000555207
Trp53	ENSMUSG00000059552	transformation related protein 53	Mus musculus	V$TRP53_01	1.92372	1.23333	1.55977	0.000100573	108.709	126.416	91.0026	0.719865	-0.474201	0.69039	1	428.702	565.157	292.248	0.517109	-0.951459	0.0285814	0.131388
Trp73	ENSMUSG00000029026	transformation related protein 73	Mus musculus	V$P73_Q6	0.384744	0.166667	2.30846	0.00253275	20.5937	16.1482	25.0392	1.55059	0.632819	0.776615	1	11.8917	1.18357	22.5998	19.0946	4.2551	0.0513262	0.178718
Uncx	ENSMUSG00000029546	UNC homeobox	Mus musculus	V$UNCX_05	2.22482	1.47222	1.5112	9.13448e-05	18.0414	19.7115	16.3713	0.830548	-0.267864	0.869205	1	9.29953	4.64946	13.9496	3.00026	1.58509	0.399885	0.569414
Zfp143	ENSMUSG00000061079	zinc finger protein 143	Mus musculus	V$STAF_03	0.986952	0.538889	1.83146	0.000249278	385.165	425.09	345.24	0.812157	-0.300169	0.602124	1	699.025	530.765	867.284	1.63403	0.70843	0.0750713	0.21696
Zfp184	ENSMUSG00000006720	zinc finger protein 184 (Kruppel-like)	Mus musculus	V$ZFP184_01	3.19505	2.21667	1.44138	2.90294e-05	10.4637	10.8157	10.1118	0.934915	-0.0970921	0.988178	1	9.30769	4.44812	14.1673	3.185	1.67129	0.35029	0.523788
Zfp239	ENSMUSG00000042097	zinc finger protein 239	Mus musculus	V$MOK2_01	1.22114	0.755556	1.61622	0.000802576	20.5123	13.5786	27.4461	2.02128	1.01527	0.377937	1	14.2852	15.9551	12.6153	0.790676	-0.338842	0.776889	0.866524
Zfp3	ENSMUSG00000043602	zinc finger protein 3	Mus musculus	V$ZFP3_07	6.94212	5.08333	1.36566	1.44024e-07	44.8713	48.3322	41.4104	0.856788	-0.222991	0.663388	1	60.6113	52.1808	69.0419	1.32313	0.403954	0.58714	0.72873
Zfp35	ENSMUSG00000063281	zinc finger protein 35	Mus musculus	V$ZFP35_02	2.30846	1.48333	1.55627	2.4273e-05	384.143	412.455	355.831	0.862714	-0.213045	0.795098	1	690.151	619.437	760.866	1.22832	0.296685	0.454074	0.617495
Zfp382	ENSMUSG00000074220	zinc finger protein 382	Mus musculus	V$ZFP382_02	0.886584	0.466667	1.89982	0.000261671	80.3102	109.1	51.5202	0.472228	-1.08244	0.197454	1	170.608	201.654	139.562	0.692086	-0.530977	0.270489	0.445619
Zfp39	ENSMUSG00000037001	zinc finger protein 39	Mus musculus	V$ZFP39_01	0.351288	0.0944444	3.71952	6.27607e-05	102.804	107.378	98.2295	0.914804	-0.128465	0.665562	1	127.882	148.384	107.379	0.723654	-0.466629	0.41081	0.578756
Zfp410	ENSMUSG00000042472	zinc finger protein 410	Mus musculus	V$APA1_01	0.267648	0.0777778	3.44119	0.000792794	131.825	155.795	107.856	0.692292	-0.530547	0.563262	1	250.521	254.513	246.53	0.968631	-0.0459805	1	1
Zfp422	ENSMUSG00000059878	zinc finger protein 422	Mus musculus	V$ZFP422_02	0.451656	0.2	2.25828	0.00140541	317.647	339.648	295.645	0.870446	-0.200173	0.75387	1	521.504	515.941	527.068	1.02157	0.0307827	0.931892	0.965847
Zfp536	ENSMUSG00000043456	zinc finger protein 536	Mus musculus	V$ZFP536_03	1.20442	0.705556	1.70705	0.000274446	18.887	13.2171	24.5569	1.85797	0.89373	0.413345	1	8.18211	3.68095	12.6833	3.44565	1.78478	0.31843	0.492207
Zfp628	ENSMUSG00000074406	zinc finger protein 628	Mus musculus	V$ZEC_04	0.267648	0.0777778	3.44119	0.000792794	59.8039	87.8285	31.7792	0.361832	-1.46661	0.0772258	1	178.442	247.703	109.181	0.440776	-1.18188	0.0210908	0.110613
Zfp629	ENSMUSG00000045639	zinc finger protein 629	Mus musculus	V$ZFP629_02	1.57243	0.983333	1.59908	0.000213356	174.813	214.324	135.301	0.631293	-0.663619	0.392325	1	345.296	460.944	229.648	0.498212	-1.00517	0.0192637	0.105262
Zfp668	ENSMUSG00000049728	zinc finger protein 668	Mus musculus	V$ZFP668_01	1.43861	0.894444	1.60838	0.000333404	96.1189	112.308	79.9299	0.711703	-0.490652	0.51163	1	233.604	286.247	180.962	0.632187	-0.661577	0.171754	0.339258
Zfp771	ENSMUSG00000054716	zinc finger protein 771	Mus musculus	V$ZFP771_01	2.05754	1.27778	1.61025	2.06996e-05	17.7285	24.8641	10.593	0.426035	-1.23095	0.398827	1	61.4813	71.9091	51.0536	0.709975	-0.494161	0.481214	0.64035
Zfp775	ENSMUSG00000007216	zinc finger protein 775	Mus musculus	V$ZFP775_03	3.4627	2.31667	1.49469	2.39953e-06	36.1764	39.6105	32.7423	0.826607	-0.274726	0.847008	1	64.662	88.0781	41.246	0.468289	-1.09453	0.0861007	0.231966
Zfp784	ENSMUSG00000043290	zinc finger protein 784	Mus musculus	V$ZFP784_01	2.69321	1.55556	1.73135	4.54886e-08	40.2727	44.9138	35.6317	0.793334	-0.334	0.687284	1	69.4829	87.8835	51.0823	0.58125	-0.78277	0.235081	0.409318
Zfp90	ENSMUSG00000031907	zinc finger protein 90	Mus musculus	V$ZFP90_05	1.03714	0.605556	1.7127	0.000652124	363.531	440.084	286.977	0.652097	-0.616842	0.282776	1	582.962	708.51	457.413	0.645598	-0.631292	0.121016	0.277737
Zfp93	ENSMUSG00000055305	zinc finger protein 93	Mus musculus	V$ZFP93_02	7.72834	5.72778	1.34927	8.9981e-08	40.125	45.5809	34.669	0.760602	-0.394786	0.602076	1	34.2114	40.0429	28.38	0.708741	-0.49667	0.528054	0.679195

## Sheet: MyD88 Privative TF
ID	Ensembl ID	Gene description	Species	Site model ID	Yes density per 1000bp	No density per 1000bp	Yes-No ratio	P-value	baseMean	KO_UN	KO_100	foldChange	log2FoldChange	pval	padj
Cdx2	ENSMUSG00000029646	caudal type homeobox 2	Mus musculus	V$CDX2_01	2.0614	1.10556	1.86459	0.000206555	8.48959	8.79332	8.18587	0.930919	-0.103273	0.927295	1
Cebpa	ENSMUSG00000034957	CCAAT/enhancer binding protein (C/EBP),alpha	Mus musculus	V$CEBPA_Q4	1.00877	0.505556	1.99537	0.00386833	138.634	188.191	89.0768	0.473331	-1.07908	0.405964	1
Cebpb	ENSMUSG00000056501	CCAAT/enhancer binding protein (C/EBP),beta	Mus musculus	V$CEBPB_Q3	1.14035	0.533333	2.13816	0.000980312	475.071	163.848	786.294	4.79893	2.26271	1.99122e-05
Dbp	ENSMUSG00000059824	D site albumin promoter binding protein	Mus musculus	V$DBP_Q6_01	1.57895	0.805556	1.96007	0.000491271	63.026	81.2724	44.7796	0.550981	-0.859925	0.356955	1
Ebf1	ENSMUSG00000057098	early B cell factor 1	Mus musculus	V$COE1_Q6_01	1.00877	0.405556	2.48738	0.000335624	18.5897	14.0658	23.1136	1.64324	0.716546	0.890733	1
Egr1	ENSMUSG00000038418	early growth response 1	Mus musculus	V$EGR1_08	1.22807	0.583333	2.10526	0.000785698	68.3364	102.004	34.6683	0.339871	-1.55694	0.132791	1
Egr2	ENSMUSG00000037868	early growth response 2	Mus musculus	V$EGR2_05	0.482456	0.127778	3.77574	0.00087281	171.287	179.825	162.748	0.905035	-0.143954	0.914432	1
Egr4	ENSMUSG00000071341	early growth response 4	Mus musculus	V$NGFIC_01	0.964912	0.422222	2.28532	0.00113744	12.1042	6.39197	17.8164	2.78731	1.47887	0.429355	1
Fos	ENSMUSG00000021250	FBJ osteosarcoma oncogene	Mus musculus	V$AP1_01	0.964912	0.3	3.21637	2.15054e-05	758.404	446.418	1070.39	2.39773	1.26167	0.0170857
Fosb	ENSMUSG00000003545	FBJ osteosarcoma oncogene B	Mus musculus	V$AP1_01	0.964912	0.3	3.21637	2.15054e-05	21.0481	25.7245	16.3717	0.636426	-0.651935	0.463513	1
Fosl2	ENSMUSG00000029135	fos-like antigen 2	Mus musculus	V$FRA2_Q4_01	0.833333	0.261111	3.19149	8.29662e-05	417.471	245.103	589.84	2.4065	1.26694	0.0112274
Foxg1	ENSMUSG00000020950	forkhead box G1	Mus musculus	V$FOXG1_03	1.09649	0.522222	2.09966	0.00149893	17.9512	12.7898	23.1126	1.80712	0.853694	0.497278	1
Hnf1a	ENSMUSG00000029556	HNF1 homeobox A	Mus musculus	V$HNF1_Q6_01	0.701754	0.222222	3.15789	0.000323494	26.9402	23.0641	30.8164	1.33612	0.41805	0.627732	1
Hnf1b	ENSMUSG00000020679	HNF1 homeobox B	Mus musculus	V$HNF1_Q6_01	0.701754	0.222222	3.15789	0.000323494	11.3847	5.43492	17.3344	3.18945	1.67331	0.268293	1
Hoxa9	ENSMUSG00000038227	homeobox A9	Mus musculus	V$HOXA9_03	1.62281	0.816667	1.98711	0.000332163	14.8848	8.10115	21.6684	2.67473	1.41939	0.332254	1
Hsf1	ENSMUSG00000022556	heat shock factor 1	Mus musculus	V$HSF1_01	2.10526	1.21111	1.73829	0.00068151	143.933	181.937	105.929	0.582228	-0.780343	0.522333	1
Hsf2	ENSMUSG00000019878	heat shock factor 2	Mus musculus	V$HSF2_Q6	1.53509	0.7	2.19298	9.79498e-05	495.369	455.308	535.43	1.17597	0.233856	0.581692	1
Irf1	ENSMUSG00000018899	interferon regulatory factor 1	Mus musculus	V$IRF1_Q5	0.921053	0.377778	2.43808	0.000737686	772.004	480.37	1063.64	2.21421	1.14679	0.0160859
Irf2	ENSMUSG00000031627	interferon regulatory factor 2	Mus musculus	V$IRF2_Q6	0.964912	0.394444	2.44626	0.000538613	1281.58	1312.68	1250.47	0.952609	-0.0700445	0.899399	1
Irf3	ENSMUSG00000003184	interferon regulatory factor 3	Mus musculus	V$IRF3_Q3	0.745614	0.272222	2.73899	0.000800965	115.157	160.015	70.2983	0.439322	-1.18665	0.259899	1
Irf5	ENSMUSG00000029771	interferon regulatory factor 5	Mus musculus	V$IRF5_04	5.78947	2.86111	2.02351	1.19533e-11	899.953	1141.22	658.688	0.57718	-0.792906	0.450438	1
Irf7	ENSMUSG00000025498	interferon regulatory factor 7	Mus musculus	V$IRF7_01	1.40351	0.616667	2.27596	0.00010742	229.885	173.275	286.494	1.6534	0.72544	0.137248	1
Irf8	ENSMUSG00000041515	interferon regulatory factor 8	Mus musculus	V$ICSBP_Q6	0.614035	0.0888889	6.90789	1.28194e-06	513.42	731.202	295.639	0.404319	-1.30643	0.211609	1
Jdp2	ENSMUSG00000034271	Jun dimerization protein 2	Mus musculus	V$JUNDM2_04	1.09649	0.372222	2.9458	2.04365e-05	155.253	59.641	250.864	4.20624	2.07253	0.000591826
Jun	ENSMUSG00000052684	jun proto-oncogene	Mus musculus	V$AP1_01	0.964912	0.3	3.21637	2.15054e-05	1524.61	1558.01	1491.2	0.957122	-0.0632258	0.908555	1
Junb	ENSMUSG00000052837	jun B proto-oncogene	Mus musculus	V$JUNB_Q6	1.14035	0.544444	2.09452	0.00125843	277.741	272.847	282.635	1.03587	0.0508494	0.729434	1
Jund	ENSMUSG00000071076	jun D proto-oncogene	Mus musculus	V$AP1_01	0.964912	0.3	3.21637	2.15054e-05	230.571	282.988	178.154	0.629547	-0.667614	0.374908	1
Mecom	ENSMUSG00000027684	MDS1 and EVI1 complex locus	Mus musculus	V$EVI1_01	1.79825	0.855556	2.10185	5.90151e-05	25.4779	21.1016	29.8542	1.41478	0.500579	0.776379	1
Nfkb1	ENSMUSG00000028163	nuclear factor of kappa light polypeptide gene enhancer in B cells 1,p105	Mus musculus	V$NFKB_Q6	0.964912	0.316667	3.04709	4.15612e-05	919.462	676.573	1162.35	1.718	0.780729	0.10581	1
Pbx1	ENSMUSG00000052534	pre B cell leukemia homeobox 1	Mus musculus	V$PBX1_02	1.57895	0.811111	1.94665	0.00054692	99.8678	94.2863	105.449	1.11839	0.161429	0.710093	1
Pou3f2	ENSMUSG00000095139	POU domain,class 3,transcription factor 2	Mus musculus	V$POU3F2_01	1.57895	0.694444	2.27368	4.2357e-05	42.7101	38.7134	46.7069	1.20648	0.270805	0.851336	1
Prdm1	ENSMUSG00000038151	PR domain containing 1,with ZNF domain	Mus musculus	V$BLIMP1_Q4	6.88596	5.65556	1.21756	0.0135985	357.15	337.764	376.536	1.11479	0.156771	0.768043	1
Rela	ENSMUSG00000024927	v-rel reticuloendotheliosis viral oncogene homolog A (avian)	Mus musculus	V$NFKB_Q6	0.964912	0.316667	3.04709	4.15612e-05	329.54	379.33	279.751	0.737488	-0.439309	0.661951	1
Tfcp2	ENSMUSG00000009733	transcription factor CP2	Mus musculus	V$CP2_02	0.877193	0.3	2.92398	0.000143207	91.6197	98.012	85.2273	0.869559	-0.201643	0.742476	1
Zfp382	ENSMUSG00000074220	zinc finger protein 382	Mus musculus	V$ZFP382_02	0.482456	0.0888889	5.42763	8.39728e-05	80.3102	109.1	51.5202	0.472228	-1.08244	0.197454	1
