# Supplementary material for: Macrophage mediated recognition and clearance of Borrelia burgdorferi elicits MyD88-dependent and -independent phagosomal signals that contribute to phagocytosis and inflammation
Source: BMC Immunol. 2021 May 17;22:32. doi: 10.1186/s12865-021-00418-8 (PMC8127205; doi:10.1186/s12865-021-00418-8)
Supplement: Supplementary file 6 — Additional file 6: Supplemental File 6. Identified master regulators. [file 12865_2021_418_MOESM6_ESM.xlsx]

## Sheet: MyD88 Dependent MR
ID	Ensembl ID Comp 2 Expressed Genes (Genes Symbol)	WT_10 Comp 2 Expressed Genes (Genes Symbol)	WT_UN Comp 2 Expressed Genes (Genes Symbol)	baseMean Comp 2 Expressed Genes (Genes Symbol)	foldChange Comp 2 Expressed Genes (Genes Symbol)	log2FoldChange Comp 2 Expressed Genes (Genes Symbol)	padj Comp 2 Expressed Genes (Genes Symbol)	pval Comp 2 Expressed Genes (Genes Symbol)	FDR	Hit names	Maximal radius	Ranks sum	Reachable total	Reached from set	Score
Acot7	ENSMUSG00000028937	1202.95	610.87	906.912	1.96925	0.977644	0.0843414	0.0134134	0.044	["bcl6","egr2","evi1","foxg1","foxo1","gata3","hnf4a","irf1","irf2","irf3","irf4","irf7","irf8","isgf3g","klf4","lhx3","mllt7","nr1h3","nr1h4","nr1i2","nr1i3","pbx1","pou2f1","pou5f1","rara","srebf1","stat5a","stat5b","tbx5","trp53","zic1"]	3.98554	480	3228	31	0.360366
Bcar3	ENSMUSG00000028121	209.32	1173.61	691.465	0.178356	-2.48717	1.85406e-07	1.95863e-09	0.028	["bcl6","egr2","evi1","foxg1","foxo1","gata3","hnf4a","irf1","irf2","irf3","irf4","irf7","irf8","isgf3g","klf4","lhx3","mllt7","nr1h3","nr1h4","nr1i2","nr1i3","pbx1","pou2f1","pou5f1","rara","srebf1","stat5a","stat5b","tbx5","trp53","zeb1","zic1"]	3.38991	194	3813	32	0.57937
Cd14	ENSMUSG00000051439	12156.5	1708.88	6932.71	7.11374	2.83061	4.85172e-11	2.29661e-13	0.049	["bcl6","egr2","evi1","foxg1","foxo1","gata3","hnf4a","irf1","irf2","irf3","irf4","irf7","irf8","isgf3g","klf4","lhx3","mllt7","nr1h3","nr1h4","nr1i2","nr1i3","pbx1","pou2f1","pou5f1","rara","srebf1","stat5a","stat5b","tbx5","trp53","zeb1","zic1"]	3.59101	309	3902	32	0.698634
Cep131	ENSMUSG00000039781	83.1351	291.712	187.424	0.28499	-1.81102	0.00435646	0.000233581	0.048	["bcl6","egr2","evi1","foxg1","foxo1","gata3","hnf4a","irf1","irf2","irf3","irf4","irf7","irf8","isgf3g","klf4","lhx3","mllt7","nr1h3","nr1h4","nr1i2","nr1i3","pou2f1","pou5f1","rara","srebf1","stat5a","stat5b","tbx5","trp53","zic1"]	3.98241	350	3005	30	0.340686
Ctss	ENSMUSG00000038642	73512.1	83181.1	78346.6	0.883761	-0.178273	0.785375	0.661011	0.009	["bcl6","egr2","evi1","foxg1","foxo1","gata3","hnf4a","irf1","irf2","irf3","irf4","irf7","irf8","isgf3g","klf4","lhx3","mllt7","nr1h3","nr1h4","nr1i2","nr1i3","pbx1","pou2f1","pou5f1","rara","srebf1","stat5a","stat5b","tbx5","trp53","zeb1","zic1"]	3.99218	193	3612	32	0.492428
Cxcl1	ENSMUSG00000029380	3281.16	15.2013	1648.18	215.848	7.75387	2.12113e-06	3.09788e-08	0.01	["bcl6","egr2","evi1","foxg1","foxo1","gata3","hnf4a","irf1","irf2","irf3","irf4","irf7","irf8","isgf3g","klf4","lhx3","mllt7","nr1h3","nr1h4","nr1i2","nr1i3","pbx1","pou2f1","pou5f1","rara","srebf1","stat5a","stat5b","tbx5","trp53","zeb1","zic1"]	3.37715	63	3807	32	0.60371
Etv6	ENSMUSG00000030199	1356.06	706.516	1031.29	1.91937	0.940633	0.0969367	0.0167804	0.032	["bcl6","egr2","evi1","foxg1","foxo1","gata3","hnf4a","irf1","irf2","irf3","irf4","irf7","irf8","isgf3g","klf4","lhx3","mllt7","nr1h3","nr1h4","nr1i2","nr1i3","pbx1","pou2f1","pou5f1","rara","srebf1","stat5a","stat5b","tbx5","trp53","zeb1","zic1"]	3.43351	127	3812	32	0.59564
Fas	ENSMUSG00000024778	1789.91	68.8699	929.389	25.9897	4.69987	1.57679e-22	1.09227e-25	0.02	["bcl6","egr2","evi1","foxg1","foxo1","gata3","hnf4a","irf1","irf2","irf3","irf4","irf7","irf8","isgf3g","klf4","lhx3","mllt7","nr1h3","nr1h4","nr1i2","nr1i3","pbx1","pou2f1","pou5f1","rara","srebf1","stat5a","stat5b","tbx5","trp53","zeb1","zic1"]	3.60612	307	3897	32	0.698873
Id3	ENSMUSG00000007872	403.744	1232.12	817.931	0.327683	-1.60963	0.00491158	0.000273606	0.025	["bcl6","egr2","evi1","foxg1","foxo1","gata3","hnf4a","irf1","irf2","irf3","irf4","irf7","irf8","isgf3g","klf4","lhx3","mllt7","nr1h3","nr1h4","nr1i2","nr1i3","pou2f1","pou5f1","rara","srebf1","stat5a","stat5b","tbx5","trp53","zic1"]	3.7311	267	3028	30	0.347536
Ifih1	ENSMUSG00000026896	3823.37	1352.09	2587.73	2.82774	1.49965	0.00105763	4.15165e-05	0.035	["bcl6","egr2","evi1","foxg1","foxo1","gata3","hnf4a","irf1","irf2","irf3","irf4","irf7","irf8","isgf3g","klf4","lhx3","mllt7","nr1h3","nr1h4","nr1i2","nr1i3","pbx1","pou2f1","pou5f1","rara","srebf1","stat5a","stat5b","tbx5","trp53","zeb1","zic1"]	3.39116	219	3814	32	0.579375
Ikbke	ENSMUSG00000042349	2997.82	1367.47	2182.64	2.19223	1.1324	0.016994	0.0014156	0.021	["bcl6","egr2","evi1","foxg1","foxo1","gata3","hnf4a","irf1","irf2","irf3","irf4","irf7","irf8","isgf3g","klf4","lhx3","mllt7","nr1h3","nr1h4","nr1i2","nr1i3","pbx1","pou2f1","pou5f1","rara","srebf1","stat5a","stat5b","tbx5","trp53","zeb1","zic1"]	3.36625	175	3823	32	0.586782
Il6	ENSMUSG00000025746	4036.16	10.7369	2023.45	375.915	8.55426	4.30421e-05	9.66925e-07	0.026	["bcl6","egr2","evi1","foxg1","foxo1","gata3","hnf4a","irf1","irf2","irf3","irf4","irf7","irf8","isgf3g","klf4","lhx3","mllt7","nr1h3","nr1h4","nr1i2","nr1i3","pbx1","pou2f1","pou5f1","rara","srebf1","stat5a","stat5b","tbx5","trp53","zeb1","zic1"]	3.23496	223	3949	32	0.793035
Il7	ENSMUSG00000040329	28.298	14.2817	21.2899	1.98142	0.986532	0.482205	0.307691	0.018	["bcl6","egr2","evi1","foxg1","foxo1","gata3","hnf4a","irf1","irf2","irf3","irf4","irf7","irf8","isgf3g","klf4","lhx3","mllt7","nr1h3","nr1h4","nr1i2","nr1i3","pbx1","pou2f1","pou5f1","rara","srebf1","stat5a","stat5b","tbx5","trp53","zic1"]	3.41307	240	3707	31	0.514605
Irak2	ENSMUSG00000060477	2506.9	848.916	1677.91	2.95306	1.56221	0.000759445	2.81881e-05	0.027	["bcl6","egr2","evi1","foxg1","foxo1","gata3","hnf4a","irf1","irf2","irf3","irf4","irf7","irf8","isgf3g","klf4","lhx3","mllt7","nr1h3","nr1h4","nr1i2","nr1i3","pbx1","pou2f1","pou5f1","rara","srebf1","stat5a","stat5b","tbx5","trp53","zeb1","zic1"]	3.37746	166	3818	32	0.58282
Irf8	ENSMUSG00000041515	754.473	1957.14	1355.81	0.385497	-1.37521	0.0048545	0.000269025	0.035	["bcl6","egr2","evi1","foxg1","foxo1","gata3","hnf4a","irf1","irf2","irf3","irf4","irf7","irf8","isgf3g","klf4","lhx3","mllt7","nr1h3","nr1h4","nr1i2","nr1i3","pbx1","pou2f1","pou5f1","rara","srebf1","stat5a","stat5b","tbx5","trp53","zeb1","zic1"]	2.81511	178	3934	32	0.78108
Kpna3	ENSMUSG00000021929	8463.53	2363.54	5413.54	3.58087	1.84031	4.33389e-05	9.78208e-07	0.035	["bcl6","egr2","evi1","foxg1","foxo1","gata3","hnf4a","irf1","irf2","irf3","irf4","irf7","irf8","isgf3g","klf4","lhx3","mllt7","nr1h3","nr1h4","nr1i2","nr1i3","pbx1","pou2f1","pou5f1","rara","srebf1","stat5a","stat5b","tbx5","trp53","zeb1","zic1"]	3.39116	219	3814	32	0.579375
Ly96	ENSMUSG00000025779	569.171	252.94	411.056	2.25023	1.17007	0.170891	0.0470855	0.01	["bcl6","egr2","evi1","foxg1","foxo1","gata3","hnf4a","irf1","irf2","irf3","irf4","irf7","irf8","isgf3g","klf4","lhx3","mllt7","nr1h3","nr1h4","nr1i2","nr1i3","pbx1","pou2f1","pou5f1","rara","srebf1","stat5a","stat5b","tbx5","trp53","zeb1","zic1"]	3.63057	303	3892	32	0.699283
Med14	ENSMUSG00000064127	1171.28	1041.88	1106.58	1.1242	0.168898	0.771041	0.641696	0.035	["bcl6","egr2","evi1","foxg1","foxo1","gata3","hnf4a","irf1","irf2","irf3","irf4","irf7","irf8","isgf3g","klf4","lhx3","mllt7","nr1h3","nr1h4","nr1i2","nr1i3","pbx1","pou2f1","pou5f1","rara","srebf1","stat5a","stat5b","tbx5","trp53","zic1"]	3.90537	397	3222	31	0.362337
Myd88	ENSMUSG00000032508	3717.11	1309.96	2513.53	2.83757	1.50465	0.00392334	0.000202927	0.005	["bcl6","egr2","evi1","foxg1","foxo1","gata3","hnf4a","irf1","irf2","irf3","irf4","irf7","irf8","isgf3g","klf4","lhx3","mllt7","nr1h3","nr1h4","nr1i2","nr1i3","pbx1","pou2f1","pou5f1","rara","srebf1","stat5a","stat5b","tbx5","trp53","zeb1","zic1"]	3.76358	160	3938	32	0.804694
Ncoa3	ENSMUSG00000027678	2522.62	6442.95	4482.79	0.391533	-1.3528	0.00624989	0.000375217	0.035	["bcl6","egr2","evi1","foxg1","foxo1","gata3","hnf4a","irf1","irf2","irf3","irf4","irf7","irf8","isgf3g","klf4","lhx3","mllt7","nr1h3","nr1h4","nr1i2","nr1i3","pbx1","pou2f1","pou5f1","rara","srebf1","stat5a","stat5b","tbx5","trp53","zeb1","zic1"]	3.37807	142	3837	32	0.610661
Ncor2	ENSMUSG00000029478	2985.31	5456.99	4221.15	0.547062	-0.870224	0.0940751	0.0159987	0.043	["bcl6","egr2","evi1","foxg1","foxo1","gata3","hnf4a","irf1","irf2","irf3","irf4","irf7","irf8","isgf3g","klf4","lhx3","mllt7","nr1h3","nr1h4","nr1i2","nr1i3","pbx1","pou2f1","pou5f1","rara","srebf1","stat5a","stat5b","tbx5","trp53","zeb1","zic1"]	3.63594	206	3854	32	0.646871
Nr3c1	ENSMUSG00000024431	4718.84	2128.54	3423.69	2.21693	1.14857	0.0240133	0.00226368	0.049	["bcl6","egr2","evi1","foxg1","foxo1","gata3","hnf4a","irf1","irf2","irf3","irf4","irf7","irf8","isgf3g","klf4","lhx3","mllt7","nr1h3","nr1h4","nr1i2","nr1i3","pbx1","pou2f1","pou5f1","rara","srebf1","stat5a","stat5b","tbx5","trp53","zeb1","zic1"]	3.05631	196	3889	32	0.654818
Pdlim5	ENSMUSG00000028273	1774.32	4452	3113.16	0.398544	-1.32719	0.00657756	0.000402103	0.026	["bcl6","egr2","evi1","foxg1","foxo1","gata3","hnf4a","irf1","irf2","irf3","irf4","irf7","irf8","isgf3g","klf4","lhx3","mllt7","nr1h3","nr1h4","nr1i2","nr1i3","pbx1","pou2f1","pou5f1","rara","srebf1","stat5a","stat5b","tbx5","trp53","zeb1","zic1"]	3.40174	91	3799	32	0.588105
Prdm1	ENSMUSG00000038151	1007.19	443.047	725.12	2.27333	1.18481	0.0379075	0.00426057	0.002	["bcl6","egr2","evi1","foxg1","foxo1","gata3","hnf4a","irf1","irf2","irf3","irf4","irf7","irf8","isgf3g","klf4","lhx3","mllt7","nr1h3","nr1h4","nr1i2","nr1i3","pbx1","pou2f1","pou5f1","prdm1","rara","srebf1","stat5a","stat5b","tbx5","trp53","zic1"]	3.51687	132	3286	32	0.419129
Psen2	ENSMUSG00000010609	396.027	1646.09	1021.06	0.240587	-2.05537	1.22583e-05	2.27856e-07	0.05	["bcl6","egr2","evi1","foxg1","foxo1","gata3","hnf4a","irf1","irf2","irf3","irf4","irf7","irf8","isgf3g","klf4","lhx3","mllt7","nr1h3","nr1h4","nr1i2","nr1i3","pbx1","pou2f1","pou5f1","rara","srebf1","stat5a","stat5b","tbx5","trp53","zeb1","zic1"]	3.45798	264	3805	32	0.575456
Rars	ENSMUSG00000018848	6829.26	3631.13	5230.2	1.88075	0.911308	0.131929	0.0287801	0.049	["bcl6","egr2","evi1","foxg1","foxo1","gata3","hnf4a","irf1","irf2","irf3","irf4","irf7","irf8","isgf3g","klf4","lhx3","mllt7","nr1h3","nr1h4","nr1i2","nr1i3","pbx1","pou2f1","pou5f1","rara","srebf1","stat5a","stat5b","tbx5","trp53","zeb1","zic1"]	3.64746	322	3825	32	0.591872
Smarcc1	ENSMUSG00000032481	2238.57	2262.05	2250.31	0.98962	-0.0150539	0.973057	0.944073	0.023	["bcl6","egr2","evi1","foxg1","foxo1","gata3","hnf4a","irf1","irf2","irf3","irf4","irf7","irf8","isgf3g","klf4","lhx3","mllt7","nr1h3","nr1h4","nr1i2","nr1i3","pbx1","pou2f1","pou5f1","rara","srebf1","stat5a","stat5b","tbx5","trp53","zic1"]	3.96307	280	3295	31	0.390731
Stat1	ENSMUSG00000026104	4178.47	2660.72	3419.6	1.57043	0.651159	0.470359	0.296067	0.006	["bcl6","egr2","evi1","foxg1","foxo1","gata3","hnf4a","irf1","irf2","irf3","irf4","irf7","irf8","isgf3g","klf4","lhx3","mllt7","nr1h3","nr1h4","nr1i2","nr1i3","pbx1","pou2f1","pou5f1","rara","srebf1","stat5a","stat5b","tbx5","trp53","zeb1","zic1"]	3.41563	286	3926	32	0.7681
Suco	ENSMUSG00000040297	2615.21	883.568	1749.39	2.95983	1.56551	0.0338597	0.00361212	0.039	["bcl6","egr2","evi1","foxg1","foxo1","gata3","hnf4a","irf1","irf2","irf3","irf4","irf7","irf8","isgf3g","klf4","lhx3","mllt7","nr1h3","nr1h4","nr1i2","nr1i3","pou2f1","pou5f1","rara","srebf1","stat5a","stat5b","tbx5","trp53","zic1"]	3.72467	305	3037	30	0.347441
Tcf3	ENSMUSG00000020167	174.623	386.288	280.455	0.452055	-1.14543	0.0750309	0.0110924	0.016	["bcl6","egr2","evi1","foxg1","foxo1","gata3","hnf4a","irf1","irf2","irf3","irf4","irf7","irf8","isgf3g","klf4","lhx3","mllt7","nr1h3","nr1h4","nr1i2","nr1i3","pbx1","pou2f1","pou5f1","rara","srebf1","stat5a","stat5b","tbx5","trp53","zeb1","zic1"]	3.35226	114	3842	32	0.618274
Trps1	ENSMUSG00000038679	3560.37	1357.16	2458.76	2.6234	1.39144	0.00370182	0.00018976	0.015	["bcl6","egr2","evi1","foxg1","foxo1","gata3","hnf4a","irf1","irf2","irf3","irf4","irf7","irf8","isgf3g","klf4","lhx3","mllt7","nr1h3","nr1h4","nr1i2","nr1i3","pou2f1","pou5f1","rara","srebf1","stat5a","stat5b","tbx5","trp53","zeb1","zic1"]	3.57679	178	3284	31	0.398795
Uba7	ENSMUSG00000032596	775.227	878.686	826.956	0.882257	-0.18073	0.862078	0.77061	0.033	["bcl6","foxg1","foxo1","gata3","hnf4a","irf1","irf2","irf3","irf4","irf7","irf8","isgf3g","klf4","mllt7","nr1h3","nr1i2","nr1i3","pou2f1","pou5f1","srebf1","stat5a","stat5b","trp53"]	3.95377	492	1964	23	0.241522
Vac14	ENSMUSG00000010936	755.664	1315.26	1035.46	0.574537	-0.799529	0.148353	0.0362017	0.014	["bcl6","egr2","evi1","foxg1","foxo1","gata3","hnf4a","irf1","irf2","irf3","irf4","irf7","irf8","isgf3g","klf4","lhx3","mllt7","nr1h3","nr1h4","nr1i2","nr1i3","pbx1","pou2f1","pou5f1","rara","srebf1","stat5a","stat5b","tbx5","trp53","zeb1","zic1"]	3.13605	303	3893	32	0.699226

## Sheet: MyD88 Independent MR
ID	Ensembl ID Comp 2 Expressed Genes (Genes Symbol)	WT_10 Comp 2 Expressed Genes (Genes Symbol)	WT_UN Comp 2 Expressed Genes (Genes Symbol)	baseMean Comp 2 Expressed Genes (Genes Symbol)	foldChange Comp 2 Expressed Genes (Genes Symbol)	log2FoldChange Comp 2 Expressed Genes (Genes Symbol)	padj Comp 2 Expressed Genes (Genes Symbol)	pval Comp 2 Expressed Genes (Genes Symbol)	Entrez ID	FDR	Gene description	Hit names	Maximal radius	Ranks sum	Reachable total	Reached from set	Score
Acot7	ENSMUSG00000028937	1202.95	610.87	906.912	1.96925	0.977644	0.0843414	0.0134134	70025	0.012	acyl-CoA thioesterase 7	["atf4","bcl6","cdx2","cebpa","cebpb","ctnnb1","dlx1","e4f1","egr2","evi1","fos","fosb","fosl2","foxa2","foxa3","foxg1","foxo1","foxo3a","gata6","gfi1b","gtf2b","hlxb9","hmga1","hoxa9","hoxb3","irf1","irf2","irf3","irf4","irf7","irf8","isgf3g","jun","junb","jund1","klf2","lef1","lhx3","lhx9","mafb","mllt7","myb","nfatc2","nfatc4","nfil3","nfkb1","nr1h2","nr1h3","nr1i2","nr1i3","nr2e1","nr4a1","pa…	3.99592	687	3230	79	0.339927
Acvr1b	ENSMUSG00000000532	1155.71	467.14	811.425	2.47401	1.30685	0.0676474	0.00961426	11479	0.023	activin A receptor,type 1B	["atf4","bcl6","cdx2","cebpa","cebpb","ctnnb1","dlx1","dlx2","e4f1","egr2","evi1","fos","fosb","fosl2","foxa2","foxa3","foxg1","foxo1","foxo3a","gata6","gfi1b","gtf2b","hlxb9","hmga1","hmga2","hoxa10","hoxa9","hoxb3","irf1","irf2","irf3","irf4","irf7","irf8","isgf3g","jun","junb","jund1","jundm2","klf2","lef1","lhx3","lhx9","mafb","meis1","mllt7","myb","nfatc2","nfatc4","nfil3","nfkb1","nr1h2","n…	3.72864	635	3586	83	0.442828
Atf2	ENSMUSG00000027104	2076.58	1446.49	1761.54	1.43561	0.52166	0.340054	0.172483	11909	0.016	activating transcription factor 2	["atf4","bcl6","cdx2","cebpa","cebpb","ctnnb1","dlx1","dlx2","e2f6","e4f1","egr2","evi1","fos","fosb","fosl2","foxa2","foxa3","foxg1","foxo1","foxo3a","gata6","gfi1b","gtf2b","hlxb9","hmga1","hmga2","hoxa10","hoxa9","hoxb3","irf1","irf2","irf3","irf4","irf7","irf8","isgf3g","jun","junb","jund1","jundm2","klf2","lef1","lhx3","lhx9","mafb","meis1","mllt7","myb","nfatc2","nfatc4","nfil3","nfkb1","nr…	3.70666	335	3906	86	0.675596
Cct4	ENSMUSG00000007739	12895	5085.69	8990.35	2.53555	1.3423	0.00515731	0.000292356	12464	0.019	chaperonin containing Tcp1,subunit 4 (delta)	["atf4","bcl6","cdx2","cebpa","cebpb","ctnnb1","e4f1","egr2","evi1","fos","fosb","fosl2","foxa2","foxo1","foxo3a","gata6","gfi1b","gtf2b","hoxa9","hoxb3","irf1","irf2","irf3","irf4","irf8","isgf3g","jun","junb","jund1","klf2","lef1","lhx9","mafb","mllt7","myb","nfatc2","nfil3","nfkb1","nr1h2","nr1h3","nr1i2","nr1i3","nr2e1","nr4a1","pax6","pbx1","pou2f1","pou2f2","pou5f1","rara","rela","relb","so…	3.99664	900	2414	63	0.235855
Cxcl2	ENSMUSG00000058427	9583.83	80.7584	4832.29	118.673	6.89085	5.84659e-11	2.93629e-13	20310	0.033	chemokine (C-X-C motif) ligand 2	["atf4","bcl6","cdx2","cebpa","cebpb","ctnnb1","dlx1","dlx2","e4f1","egr2","evi1","fos","fosb","fosl2","foxa2","foxa3","foxg1","foxo1","foxo3a","gata6","gfi1b","gtf2b","hlxb9","hmga1","hmga2","hoxa10","hoxa9","hoxb3","irf1","irf2","irf3","irf4","irf7","irf8","isgf3g","jun","junb","jund1","jundm2","klf2","lef1","lhx3","lhx9","mafb","meis1","mllt7","myb","nfatc2","nfatc4","nfil3","nfkb1","nr1h2","n…	3.90621	552	3745	84	0.510069
Fkbp3	ENSMUSG00000020949	895.17	682.589	788.88	1.31143	0.391145	0.522142	0.348617	30795	0.036	FK506 binding protein 3	["atf4","bcl6","cdx2","cebpa","cebpb","ctnnb1","dlx1","dlx2","e4f1","egr2","evi1","fos","fosb","fosl2","foxa2","foxa3","foxg1","foxo1","foxo3a","gata6","gfi1b","gtf2b","hlxb9","hmga1","hmga2","hoxa10","hoxa9","hoxb3","irf1","irf2","irf3","irf4","irf7","irf8","isgf3g","jun","junb","jund1","jundm2","klf2","lef1","lhx3","lhx9","mafb","meis1","mllt7","myb","nfatc2","nfatc4","nfil3","nfkb1","nr1h2","n…	3.95211	767	3439	84	0.384419
Flna	ENSMUSG00000031328	27160.6	28816.9	27988.7	0.942524	-0.0853994	0.890124	0.812997	192176	0.007	alpha,filamin	["atf4","bcl6","cdx2","cebpa","cebpb","ctnnb1","dlx1","dlx2","e2f6","e4f1","egr2","evi1","fos","fosb","fosl2","foxa2","foxa3","foxg1","foxo1","foxo3a","gata6","gfi1b","gtf2b","hlxb9","hmga1","hmga2","hoxa10","hoxa9","hoxb3","irf1","irf2","irf3","irf4","irf7","irf8","isgf3g","jun","junb","jund1","jundm2","klf2","lef1","lhx3","lhx9","mafb","meis1","mllt7","myb","nfatc2","nfatc4","nfil3","nfkb1","nr…	3.75777	328	3915	86	0.684418
Il12b	ENSMUSG00000004296	1714.01	7.70953	860.859	222.323	7.79652	0.0867334	0.0140041	16160	0.013	interleukin 12b	["atf4","bcl6","cdx2","cebpa","cebpb","ctnnb1","dlx1","dlx2","e4f1","egr2","evi1","fos","fosb","fosl2","foxa2","foxa3","foxg1","foxo1","foxo3a","gata6","gfi1b","gtf2b","hlxb9","hmga1","hmga2","hoxa10","hoxa9","hoxb3","irf1","irf2","irf3","irf4","irf7","irf8","isgf3g","jun","junb","jund1","jundm2","klf2","lef1","lhx3","lhx9","mafb","meis1","mllt7","myb","nfatc2","nfatc4","nfil3","nfkb1","nr1h2","n…	3.90506	508	3749	84	0.518993
Kpna4	ENSMUSG00000027782	2762.43	1497.19	2129.81	1.84508	0.883682	0.10244	0.0184365	16649	0.008	karyopherin (importin) alpha 4	["atf4","bcl6","cdx2","cebpa","cebpb","ctnnb1","dlx1","dlx2","e4f1","egr2","evi1","fos","fosb","fosl2","foxa2","foxa3","foxg1","foxo1","foxo3a","gata6","gfi1b","gtf2b","hlxb9","hmga1","hmga2","hoxa10","hoxa9","hoxb3","irf1","irf2","irf3","irf4","irf7","irf8","isgf3g","jun","junb","jund1","jundm2","klf2","lef1","lhx3","lhx9","mafb","meis1","mllt7","myb","nfatc2","nfatc4","nfil3","nfkb1","nr1h2","n…	3.83713	516	3556	83	0.440399
Lcn2	ENSMUSG00000026822	4058.67	13.2795	2035.97	305.634	8.25566	0.00017459	4.81753e-06	16819	0.049	lipocalin 2	["atf4","bcl6","cdx2","cebpa","cebpb","ctnnb1","dlx1","dlx2","e4f1","egr2","evi1","fos","fosb","fosl2","foxa2","foxa3","foxg1","foxo1","foxo3a","gata6","gfi1b","gtf2b","hlxb9","hmga1","hmga2","hoxa10","hoxa9","hoxb3","irf1","irf2","irf3","irf4","irf7","irf8","isgf3g","jun","junb","jund1","jundm2","klf2","lef1","lhx3","lhx9","mafb","meis1","mllt7","myb","nfatc2","nfatc4","nfil3","nfkb1","nr1h2","n…	3.90621	578	3749	84	0.509973
Lemd3	ENSMUSG00000048661	445.846	386.182	416.014	1.1545	0.207264	0.761354	0.629151	380664	0.007	LEM domain containing 3	["atf4","bcl6","cdx2","cebpa","cebpb","ctnnb1","dlx1","dlx2","e4f1","egr2","evi1","fos","fosb","fosl2","foxa2","foxa3","foxg1","foxo1","foxo3a","gata6","gfi1b","gtf2b","hlxb9","hmga1","hmga2","hoxa10","hoxa9","hoxb3","irf1","irf2","irf3","irf4","irf7","irf8","isgf3g","jun","junb","jund1","jundm2","klf2","lef1","lhx3","lhx9","mafb","meis1","mllt7","myb","nfatc2","nfatc4","nfil3","nfkb1","nr1h2","n…	3.64331	474	3541	83	0.438332
Med12	ENSMUSG00000079487	2384.77	2555.62	2470.19	0.933147	-0.0998244	0.916332	0.852476	59024	0	mediator complex subunit 12	["atf4","bcl6","cdx2","cebpa","cebpb","ctnnb1","dlx1","e4f1","egr2","evi1","fos","fosb","fosl2","foxa2","foxg1","foxo1","foxo3a","gata6","gfi1b","gtf2b","hlxb9","hoxa9","irf1","irf2","irf3","irf4","irf8","isgf3g","jun","junb","jund1","klf2","lef1","lhx9","mafb","mllt7","myb","nfatc2","nfatc4","nfil3","nfkb1","nr1h2","nr1h3","nr1i2","nr1i3","nr2e1","nr4a1","pax6","pbx1","pou2f1","pou2f2","pou5f1",…	3.88463	454	2882	72	0.316365
Nap1l1	ENSMUSG00000058799	8994.52	7972.55	8483.54	1.12819	0.174005	0.825919	0.717691	53605	0.001	nucleosome assembly protein 1-like 1	["atf4","bcl6","cdx2","cebpa","cebpb","ctnnb1","dlx1","dlx2","e4f1","egr2","evi1","fos","fosb","fosl2","foxa2","foxa3","foxg1","foxo1","foxo3a","gata6","gfi1b","gtf2b","hlxb9","hmga1","hmga2","hoxa10","hoxa9","hoxb3","irf1","irf2","irf3","irf4","irf7","irf8","isgf3g","jun","junb","jund1","jundm2","klf2","lef1","lhx3","lhx9","mafb","meis1","mllt7","myb","nfatc2","nfatc4","nfil3","nfkb1","nr1h2","n…	3.55691	317	3719	84	0.499152
Nap1l4	ENSMUSG00000059119	2107.64	1691.3	1899.47	1.24617	0.317497	0.592845	0.427137	17955	0	nucleosome assembly protein 1-like 4	["atf4","bcl6","cdx2","cebpa","cebpb","ctnnb1","dlx1","dlx2","e4f1","egr2","evi1","fos","fosb","fosl2","foxa2","foxa3","foxg1","foxo1","foxo3a","gata6","gfi1b","gtf2b","hlxb9","hmga1","hmga2","hoxa10","hoxa9","hoxb3","irf1","irf2","irf3","irf4","irf7","irf8","isgf3g","jun","junb","jund1","jundm2","klf2","lef1","lhx3","lhx9","mafb","meis1","mllt7","myb","nfatc2","nfatc4","nfil3","nfkb1","nr1h2","n…	3.55768	330	3720	84	0.499144
Ncor2	ENSMUSG00000029478	2985.31	5456.99	4221.15	0.547062	-0.870224	0.0940751	0.0159987	20602	0.004	nuclear receptor co-repressor 2	["atf4","bcl6","cdx2","cebpa","cebpb","ctnnb1","dlx1","dlx2","e2f6","e4f1","egr2","evi1","fos","fosb","fosl2","foxa2","foxa3","foxg1","foxo1","foxo3a","gata6","gfi1b","gtf2b","hlxb9","hmga1","hmga2","hoxa10","hoxa9","hoxb3","irf1","irf2","irf3","irf4","irf7","irf8","isgf3g","jun","junb","jund1","jundm2","klf2","lef1","lhx3","lhx9","mafb","meis1","mllt7","myb","nfatc2","nfatc4","nfil3","nfkb1","nr…	3.58805	162	3846	86	0.624514
Plau	ENSMUSG00000021822	454.806	3810.45	2132.63	0.119358	-3.06664	0.189536	0.0577338	18792	0.021	plasminogen activator,urokinase	["atf4","bcl6","cdx2","cebpa","cebpb","ctnnb1","dlx1","dlx2","e2f6","e4f1","egr2","evi1","fos","fosb","fosl2","foxa2","foxa3","foxg1","foxo1","foxo3a","gata6","gfi1b","gtf2b","hlxb9","hmga1","hmga2","hoxa10","hoxa9","hoxb3","irf1","irf2","irf3","irf4","irf7","irf8","isgf3g","jun","junb","jund1","jundm2","klf2","lef1","lhx3","lhx9","mafb","meis1","mllt7","myb","nfatc2","nfatc4","nfil3","nfkb1","nr…	3.91543	552	3846	86	0.582277
Polr2c	ENSMUSG00000031783	364.86	580.129	472.494	0.628929	-0.669031	0.238624	0.0907382	20021	0.022	polymerase (RNA) II (DNA directed) polypeptide C	["atf4","bcl6","cdx2","cebpa","cebpb","ctnnb1","dlx1","e4f1","egr2","evi1","fos","fosb","fosl2","foxa2","foxg1","foxo1","foxo3a","gata6","gfi1b","gtf2b","hoxa9","irf1","irf2","irf3","irf4","irf8","isgf3g","jun","junb","jund1","klf2","lef1","lhx9","mafb","mllt7","myb","nfatc2","nfatc4","nfil3","nfkb1","nr1h2","nr1h3","nr1i2","nr1i3","nr2e1","nr4a1","pax6","pbx1","pou2f1","pou2f2","pou5f1","rara","…	3.90173	799	2867	71	0.286137
Psmc6	ENSMUSG00000021832	3630.5	1336.41	2483.46	2.71661	1.44181	0.00349979	0.000175969	67089	0.019	6,ATPase,macropain) 26S subunit,proteasome (prosome	["atf4","bcl6","cdx2","cebpa","cebpb","ctnnb1","e4f1","egr2","evi1","fos","fosb","fosl2","foxa2","foxo1","foxo3a","gata6","gfi1b","gtf2b","hoxa9","hoxb3","irf1","irf2","irf3","irf4","irf8","isgf3g","jun","junb","jund1","klf2","lef1","lhx9","mafb","mllt7","myb","nfatc2","nfil3","nfkb1","nr1h2","nr1h3","nr1i2","nr1i3","nr2e1","nr4a1","pax6","pbx1","pou2f1","pou2f2","pou5f1","rara","rela","relb","so…	3.99702	888	2410	63	0.23587
Rars	ENSMUSG00000018848	6829.26	3631.13	5230.2	1.88075	0.911308	0.131929	0.0287801	104458	0.012	arginyl-tRNA synthetase	["atf4","bcl6","cdx2","cebpa","cebpb","ctnnb1","dlx1","dlx2","e2f6","e4f1","egr2","evi1","fos","fosb","fosl2","foxa2","foxa3","foxg1","foxo1","foxo3a","gata6","gfi1b","gtf2b","hlxb9","hmga1","hmga2","hoxa10","hoxa9","hoxb3","irf1","irf2","irf3","irf4","irf7","irf8","isgf3g","jun","junb","jund1","jundm2","klf2","lef1","lhx3","lhx9","mafb","meis1","mllt7","myb","nfatc2","nfatc4","nfil3","nfkb1","nr…	3.9201	499	3824	86	0.562881
Rpa2	ENSMUSG00000028884	163.65	253.847	208.748	0.644681	-0.633342	0.619844	0.457002	19891	0.006	replication protein A2	["atf4","bcl6","cdx2","cebpa","cebpb","ctnnb1","dlx1","dlx2","e2f6","e4f1","egr2","evi1","fos","fosb","fosl2","foxa2","foxa3","foxg1","foxo1","foxo3a","gata6","gfi1b","gtf2b","hlxb9","hmga1","hmga2","hoxa10","hoxa9","hoxb3","irf1","irf2","irf3","irf4","irf7","irf8","isgf3g","jun","junb","jund1","klf2","lef1","lhx3","lhx9","mafb","meis1","mllt7","myb","nfatc2","nfatc4","nfil3","nfkb1","nr1h2","nr1…	3.98333	510	3354	83	0.372545
Smad1	ENSMUSG00000031681	594.739	722.212	658.475	0.823496	-0.280166	0.613567	0.44901	17125	0.002	SMAD family member 1	["atf4","bcl6","cdx2","cebpa","cebpb","ctnnb1","dlx1","dlx2","e4f1","egr2","evi1","fos","fosb","fosl2","foxa2","foxa3","foxg1","foxo1","foxo3a","gata6","gfi1b","gtf2b","hlxb9","hmga1","hmga2","hoxa10","hoxa9","hoxb3","hoxd13","irf1","irf2","irf3","irf4","irf7","irf8","isgf3g","jun","junb","jund1","jundm2","klf2","lef1","lhx3","lhx9","mafb","meis1","mllt7","myb","nfatc2","nfatc4","nfil3","nfkb1","…	3.60193	293	3746	85	0.542199
Smarca5	ENSMUSG00000031715	5101.22	2576.24	3838.73	1.9801	0.985575	0.0646747	0.0089715	93762	0.034	SWI/SNF related,actin dependent regulator of chromatin,matrix associated,member 5,subfamily a	["atf4","bcl6","cdx2","cebpa","cebpb","ctnnb1","dlx1","dlx2","egr2","evi1","fos","fosb","fosl2","foxa2","foxg1","foxo1","foxo3a","gata6","gfi1b","gtf2b","hmga1","hoxa9","irf1","irf2","irf3","irf4","irf8","isgf3g","jun","junb","jund1","jundm2","klf2","lef1","lhx3","mafb","mllt7","myb","nfatc2","nfil3","nfkb1","nr1h2","nr1h3","nr1i2","nr1i3","nr4a1","pax6","pbx1","pou2f1","pou2f2","pou5f1","rara","…	3.99082	873	2679	71	0.272712
Smarcc1	ENSMUSG00000032481	2238.57	2262.05	2250.31	0.98962	-0.0150539	0.973057	0.944073	20588	0.045	SWI/SNF related,actin dependent regulator of chromatin,matrix associated,member 1,subfamily c	["atf4","bcl6","cdx2","cebpa","cebpb","ctnnb1","dlx1","e4f1","egr2","evi1","fos","fosb","fosl2","foxa2","foxa3","foxg1","foxo1","foxo3a","gata6","gfi1b","gtf2b","hlxb9","hmga1","hoxa9","hoxb3","irf1","irf2","irf3","irf4","irf7","irf8","isgf3g","jun","junb","jund1","klf2","lef1","lhx3","lhx9","mafb","mllt7","myb","nfatc2","nfatc4","nfil3","nfkb1","nr1h2","nr1h3","nr1i2","nr1i3","nr2e1","nr4a1","pa…	3.97392	791	3297	78	0.350685
Sub1	ENSMUSG00000022205	2875.3	1502.41	2188.85	1.91379	0.93643	0.131246	0.0285252	20024	0.036	SUB1 homolog (S. cerevisiae)	["atf4","bcl6","cdx2","cebpa","cebpb","ctnnb1","dlx1","dlx2","e4f1","egr2","evi1","fos","fosb","fosl2","foxa2","foxg1","foxo1","foxo3a","gata6","gfi1b","gtf2b","hoxa9","hoxb3","irf1","irf2","irf3","irf4","irf8","isgf3g","jun","junb","jund1","jundm2","klf2","lef1","lhx9","mafb","mllt7","myb","nfatc2","nfatc4","nfil3","nfkb1","nr1h2","nr1h3","nr1i2","nr1i3","nr2e1","nr4a1","pax6","pbx1","pou2f1","p…	3.93424	908	3023	74	0.304796
Upf1	ENSMUSG00000058301	1481.31	1873.11	1677.21	0.790833	-0.338556	0.530349	0.357403	19704	0.025	UPF1 regulator of nonsense transcripts homolog (yeast)	["atf4","bcl6","cebpa","cebpb","ctnnb1","egr2","evi1","fos","fosb","fosl2","foxa2","foxo1","foxo3a","gata6","gtf2b","irf1","irf2","irf3","irf4","isgf3g","jun","junb","jund1","klf2","lef1","lhx3","mafb","mllt7","myb","nfatc2","nfatc4","nfil3","nfkb1","nr1h2","nr1h3","nr1i2","nr1i3","nr4a1","pax6","pou2f1","pou2f2","pou5f1","rela","relb","sox9","stat3","stat5a","stat5b","stat6","tbp","tbx2","tbx5",…	3.98637	961	2088	57	0.212154
Vrk1	ENSMUSG00000021115	519.058	684.365	601.711	0.758452	-0.398871	0.742408	0.605143	22367	0.05	vaccinia related kinase 1	["atf4","bcl6","cdx2","cebpa","cebpb","ctnnb1","dlx1","dlx2","e2f6","e4f1","egr2","evi1","fos","fosb","fosl2","foxa2","foxa3","foxg1","foxo1","foxo3a","gata6","gfi1b","gtf2b","hlxb9","hmga1","hmga2","hoxa10","hoxa9","hoxb3","irf1","irf2","irf3","irf4","irf7","irf8","isgf3g","jun","junb","jund1","jundm2","klf2","lef1","lhx3","lhx9","mafb","meis1","mllt7","myb","nfatc2","nfatc4","nfil3","nfkb1","nr…	3.91315	593	3850	86	0.578928

## Sheet: MyD88 Privative MR
ID	Ensembl ID_1	Entrez ID	FDR	Gene description	Hit names	Maximal radius	Ranks sum	Reachable total	Reached from set	Score	Z-Score	KO_100 Comparison 5 Expressed Genes (Gene Symbol)	KO_UN Comparison 5 Expressed Genes (Gene Symbol)	baseMean Comparison 5 Expressed Genes (Gene Symbol)	foldChange Comparison 5 Expressed Genes (Gene Symbol)	log2FoldChange Comparison 5 Expressed Genes (Gene Symbol)	padj Comparison 5 Expressed Genes (Gene Symbol)	pval Comparison 5 Expressed Genes (Gene Symbol)
Cd40	ENSMUSG00000017652	21939	0.049	CD40 antigen	["cdx2","cebpa","cebpb","ebf1","egr1","egr2","evi1","fos","fosb","fosl2","foxg1","hoxa9","hsf1","hsf2","irf1","irf2","irf3","irf7","irf8","jun","junb","jund1","jundm2","nfkb1","pbx1","pou3f2","rela","tcf1","tcf2","tcfcp2"]	3.14861	355	3903	30	0.713765	1.16337	93.8941	26.9464	60.4203	3.48447	1.80094	0	0.0181332
Csf1	ENSMUSG00000014599	12977	0.046	colony stimulating factor 1 (macrophage)	["cdx2","cebpa","cebpb","ebf1","egr1","egr2","evi1","fos","fosb","fosl2","foxg1","hoxa9","hsf1","hsf2","irf1","irf2","irf3","irf7","irf8","jun","junb","jund1","jundm2","nfkb1","pbx1","pou3f2","rela","tcf1","tcf2","tcfcp2"]	3.28098	357	3907	30	0.713542	1.12303	96.2999	40.4283	68.3641	2.38199	1.25217	1	0.0484196
Cxcl1	ENSMUSG00000029380	14825	0.005	chemokine (C-X-C motif) ligand 1	["cdx2","cebpa","cebpb","ebf1","egr1","egr2","evi1","fos","fosb","fosl2","foxg1","hoxa9","hsf1","hsf2","irf1","irf2","irf3","irf7","irf8","jun","junb","jund1","jundm2","nfkb1","pbx1","pou3f2","rela","tcf1","tcf2","tcfcp2"]	3.74303	92	3795	30	0.604903	3.16513	6.74118	8.89578	7.81848	0.757795	-0.400121	1	0.863396
Cxcl2	ENSMUSG00000058427	20310	0.047	chemokine (C-X-C motif) ligand 2	["cdx2","cebpa","cebpb","ebf1","egr1","egr2","evi1","fos","fosb","fosl2","foxg1","hoxa9","hsf1","hsf2","irf1","irf2","irf3","irf7","irf8","jun","junb","jund1","jundm2","nfkb1","pbx1","pou3f2","rela","tcf1","tcf2","tcfcp2"]	3.57078	410	3745	30	0.558655	1.56167	228.713	20.9817	124.847	10.9006	3.44633	0	1.63174e-07
Dag1	ENSMUSG00000039952	13138	0.044	dystroglycan 1	["cdx2","cebpa","cebpb","ebf1","egr1","egr2","evi1","fos","fosb","fosl2","foxg1","hoxa9","hsf1","hsf2","irf1","irf2","irf3","irf7","irf8","jun","junb","jund1","jundm2","nfkb1","pbx1","rela","tcf1","tcf2","tcfcp2"]	3.99549	436	3309	29	0.401674	2.17791	720.811	790.064	755.437	0.912345	-0.132349	1	0.895427
Dusp4	ENSMUSG00000031530	319520	0.047		["cdx2","cebpa","cebpb","ebf1","egr1","egr2","evi1","fos","fosb","fosl2","foxg1","hoxa9","hsf1","hsf2","irf1","irf2","irf3","irf7","irf8","jun","junb","jund1","jundm2","nfkb1","pbx1","pou3f2","rela","tcf1","tcf2","tcfcp2"]	3.73237	439	3855	30	0.804566	1.12096	1472.47	237.649	855.059	6.19597	2.63133	0	2.5666e-06
Flna	ENSMUSG00000031328	192176	0.018	alpha,filamin	["cdx2","cebpa","cebpb","ebf1","egr1","egr2","evi1","fos","fosb","fosl2","foxg1","hoxa9","hsf1","hsf2","irf1","irf2","irf3","irf7","irf8","jun","junb","jund1","jundm2","nfkb1","pbx1","pou3f2","rela","tcf1","tcf2","tcfcp2"]	3.12432	351	3915	30	0.735372	1.37321	9233.13	9036.96	9135.05	1.02171	0.0309835	1	0.703366
Il12b	ENSMUSG00000004296	16160	0.014	interleukin 12b	["cdx2","cebpa","cebpb","ebf1","egr1","egr2","evi1","fos","fosb","fosl2","foxg1","hoxa9","hsf1","hsf2","irf1","irf2","irf3","irf7","irf8","jun","junb","jund1","jundm2","nfkb1","pbx1","pou3f2","rela","tcf1","tcf2","tcfcp2"]	3.49339	371	3749	30	0.567203	1.8021	25.0388	17.4242	21.2315	1.43701	0.523071	1	0.700042
Ncor2	ENSMUSG00000029478	20602	0.034	nuclear receptor co-repressor 2	["cdx2","cebpa","cebpb","ebf1","egr1","egr2","evi1","fos","fosb","fosl2","foxg1","hoxa9","hsf1","hsf2","irf1","irf2","irf3","irf7","irf8","jun","junb","jund1","jundm2","nfkb1","pbx1","pou3f2","rela","tcf1","tcf2","tcfcp2"]	3.40403	223	3846	30	0.65856	2.20509	1161.86	2502.18	1832.02	0.464338	-1.10675	1	0.306223
Plau	ENSMUSG00000021822	18792	0.047	plasminogen activator,urokinase	["cdx2","cebpa","cebpb","ebf1","egr1","egr2","evi1","fos","fosb","fosl2","foxg1","hoxa9","hsf1","hsf2","irf1","irf2","irf3","irf7","irf8","jun","junb","jund1","jundm2","nfkb1","pbx1","pou3f2","rela","tcf1","tcf2","tcfcp2"]	3.41064	238	3846	30	0.61087	2.21847	372.197	1230.47	801.334	0.302483	-1.72507	1	0.451464
Ubp1	ENSMUSG00000009741	22221	0.024	upstream binding protein 1	["cebpa","cebpb","egr1","egr2","evi1","fos","fosb","fosl2","foxg1","hsf1","hsf2","irf1","irf2","irf3","irf8","jun","junb","jund1","nfkb1","pbx1","rela","tcf2","tcfcp2"]	3.95926	557	2169	23	0.263359	2.15029	843.593	1108.83	976.212	0.760796	-0.394419	1	0.649618
Vcam1	ENSMUSG00000027962	22329	0.02	vascular cell adhesion molecule 1	["cdx2","cebpa","cebpb","ebf1","egr1","egr2","evi1","fos","fosb","fosl2","foxg1","hoxa9","hsf1","hsf2","irf1","irf2","irf3","irf7","irf8","jun","junb","jund1","jundm2","nfkb1","pbx1","pou3f2","rela","tcf1","tcf2","tcfcp2"]	3.26958	202	3855	30	0.626557	2.3767	58.7427	11.1405	34.9416	5.27288	2.39859	0	0.00707442
